# Supplementary material for: A Genome-Wide Association Study Pinpoints Quantitative Trait Genes for Plant Height, Heading Date, Grain Quality, and Yield in Rye (Secale cereale L.)
Source: Front Plant Sci. 2021 Oct 29;12:718081. doi: 10.3389/fpls.2021.718081 (PMC8586073; doi:10.3389/fpls.2021.718081)
Supplement: Supplementary file 1 [file Table_1.XLSX]

## Sheet: supplTable1
DArTseqTM SNP ID	Chromosome	Lo7 Physical map position (bp)	Sequence 5' >3'	SNP	MAF	PIC	No Hom1	No Het	No Hom2	No of obs	No of alleles (n= )	Gene diversity (n= )	Heterozygosity (n= )
100025094|F|0--52:C>G	chr5R	690471899	TGCAGAAAACAGAACACTACAGTCTCGCTTGATTCAATCCACATGGAAACCCCACGTGCGTTGATACCA	52:C>G	0.5	0.37	94	17	95	206	2	0.5	0.08
100003694|F|0--28:C>T			TGCAGAAAACAGTTCAACTAGACCTGCTCCTTCCGCCGAGATCGGAAGAGCGGTTCAGCAGGAATGCCG	28:C>T	0.45	0.37	76	26	96	198	2	0.49	0.13
100011507|F|0--22:T>C	chr5R	865111693	TGCAGAAAACATGGGGATTGGATCCTGTGATTTATTTGCATATATTCTTGTCTCGATGAGGAGGCAATC	22:T>C	0.37	0.36	97	32	50	179	2	0.47	0.18
100026805|F|0--38:T>C	chr5R	706347198	TGCAGAAAAGTGGTCGGGTGCTACAAGAAAAGGGCCGATTGCCCACGGCCGACTGCTGGCAAAAAATGT	38:T>C	0.21	0.28	162	12	39	213	2	0.33	0.06
100019038|F|0--20:G>C	chr3R	655395786	TGCAGAAAATTCAGTCAGTAGATGTATGATGGAGGGAGGGAGCAGCAGGTACAGTTGCATTGGCGACCA	20:G>C	0.2	0.27	163	17	34	214	2	0.32	0.08
100002186|F|0--22:C>T			TGCAGAAACAAGAGAAGAAATGCATCAGTTCTGTACAGAAGAAACACGAAATCCGAGATCGGAAGAGCG	22:C>T	0.09	0.15	10	15	168	193	2	0.16	0.08
100019452|F|0--26:G>C			TGCAGAAAGAACGATGTGAGGAAGGTGGTGTGCATCCCGAGATCGGAAGAGCGGTTCAGCAGGAATGCC	26:G>C	0.29	0.33	137	14	52	203	2	0.41	0.07
100070036|F|0--21:T>C			TGCAGAAAGAATTTGATCTTCTTTCATCCAGGGAGGAGATCGGTGGCCGCCGCCGAGATCGGAAGAGCG	21:T>C	0.27	0.31	129	18	41	188	2	0.39	0.1
100012762|F|0--50:G>A	chr6R	661024998	TGCAGAAAGCATCCAAAGATTGAGATCGACGATGAACCAGAAGATCATCAGAATCACTACTTACATTGT	50:G>A	0.35	0.35	132	14	68	214	2	0.46	0.07
100039576|F|0--13:C>G	chr1R	320936366	TGCAGAAAGCCTTCAAAGTCCTCCTTGGCGACATGCGTGACCCCAAAATGCTCTACTCGGACAGGGGTC	13:C>G	0.22	0.29	35	24	153	212	2	0.35	0.11
100009159|F|0--29:C>G	chr2R	757398465	TGCAGAAAGCTTCGCTTGATCACATCTGCCCCAACTTGCACGCCATTATTTAGAAGCCTCTGGACACCA	29:C>G	0.27	0.32	49	17	147	213	2	0.39	0.08
100032007|F|0--34:C>T			TGCAGAAAGGAGTAAAAGGCCGAGCGCTAGCTGCCCTGGCCCCTCGCCTCGCCGAGATCGGAAGAGCGG	34:C>T	0.17	0.24	29	11	164	204	2	0.28	0.05
100006477|F|0--68:G>A	chr7R	49102323	TGCAGAAAGTTCTCTGCTAATAAGGTGTCTTGAAACCCCAGAATCTGGCAGCGATAAATTACAGACTTG	68:G>A	0.21	0.28	133	71	10	214	2	0.33	0.33
100025165|F|0--51:T>C	chr6R	658701517	TGCAGAAATACCGTGCGAAGCTCCAAATGAAGAATGACATGTGCAACACCTTGAATAGGTGCCCGCGCT	51:T>C	0.1	0.16	180	14	13	207	2	0.17	0.07
100003232|F|0--15:C>T			TGCAGAAATACTTCTCTGAAACGAGAGATGGGTCAACAAGCAAGATGAGCGAGTCCGAGATCGGAAGAG	15:C>T	0.4	0.36	74	23	117	214	2	0.48	0.11
100024323|F|0--51:G>A	chr7R	717321418	TGCAGAAATGGCGTTGCGTCAGTAAACAGAGCAGAGCAGAGCAGGAAGCCAGTTAATGGAGACAGATAA	51:G>A	0.37	0.36	121	26	67	214	2	0.47	0.12
100006347|F|0--10:T>C			TGCAGAAATTTTGTAGGCGAGCTCTTTGTTAGCAAGGTGATATCTTGAAGCACCTAGAGGACTACCACA	10:T>C	0.22	0.28	134	12	33	179	2	0.34	0.07
100081929|F|0--21:T>C	chr7R	189429874	TGCAGAACAAACAATCATCGTTCGTTGACGCTCCACACAGAGATAATGCAAGCAGCAAGAAGGGGAGGA	21:T>C	0.14	0.21	170	29	15	214	2	0.24	0.14
100056675|F|0--23:A>T	chr2R	131658537	TGCAGAACACAGTACAGGAGGAAATTTTTTTACCAAGGTCAGGCAGCAAAGCAGGGGACGGCGCGCGGC	23:A>T	0.24	0.3	140	9	40	189	2	0.36	0.05
100032931|F|0--44:C>G	chr3R	750725799	TGCAGAACACCAACGCCGAGATCTCCGTCTCGTCGGGGCACCGTCCGAAGCCTGATGCGTTCGAGCTCT	44:C>G	0.42	0.37	106	31	72	209	2	0.49	0.15
100081926|F|0--64:C>T	chr1R	394997468	TGCAGAACACCACCCAGTTCGGCCTCATGGCCGTCAGCCTCGGCTACTACGACACCCTCATGTCCTGCT	64:C>T	0.49	0.37	82	29	87	198	2	0.5	0.15
100047229|F|0--27:T>G	chr5R	664391849	TGCAGAACACTCCCGTCAGGACTTACTTCTGTAGTGACCATCAACTTTCAGACAGACAGCATGGGTAAA	27:T>G	0.34	0.35	56	17	118	191	2	0.45	0.09
100000505|F|0--20:C>G	chr3R	43318625	TGCAGAACACTTATCTCTCTCCATCGTTATGGACTGGCAACCACAAAGAATAGACATATGAGCCGAGAT	20:C>G	0.37	0.36	64	29	121	214	2	0.46	0.14
100004331|F|0--37:T>G			TGCAGAACAGAGGAACACTCTATCTTGCTAAGCATATTGGTACAAGGCCCGAGATCGGAAGAGCGGTTC	37:T>G	0.08	0.14	163	5	12	180	2	0.15	0.03
100001005|F|0--21:G>A	chr2R	527261379	TGCAGAACAGAGGACAAGCAAGAAAACCACGGTACAACGCTGATACGAACTGTGCATCCAGACCCGAGA	21:G>A	0.17	0.24	155	19	24	198	2	0.28	0.1
100057107|F|0--19:C>T			TGCAGAACATGGTGCGCGACGCCGTGCAAGGAGCGATCGCGAGGGATGCCGAGATCGGAAGAGCGGTTC	19:C>T	0.11	0.18	18	10	178	206	2	0.2	0.05
100003116|F|0--25:T>C			TGCAGAACCAAATATTAGAAGAAAATAGAAAGCTTAATTTGGTAAACCGAGATCGGAAGAGCGGTTCAG	25:T>C	0.25	0.3	112	47	21	180	2	0.37	0.26
100009052|F|0--58:C>G			TGCAGAACCACAGGAGTTTCGCAATGCGTCAGTAACCCTGGATCAACGCGCTACGCAACAACCAAAAAT	58:C>G	0.14	0.21	24	11	174	209	2	0.24	0.05
100013110|F|0--40:C>T	chr6R	679636524	TGCAGAACCTCCAGTGGATCAAGATCATTCTAAACACTTTCAAGAACCAACTTTGCGACCTGCATACCG	40:C>T	0.28	0.32	45	10	126	181	2	0.4	0.06
100055461|F|0--16:G>A			TGCAGAACCTCGACGTGTCCAGGAACTCGCTCTCGGGCGACCTGCCGCTCGACCTCCGAGATCGGAAGA	16:G>A	0.11	0.18	152	13	14	179	2	0.2	0.07
100041719|F|0--17:T>C	chr2R	687944600	TGCAGAACCTGCGCTCGTTGTCGCTCGACTCGTGCAAGGTGACGGCCTGCGAGATCAAGAAGCTTCAGT	17:T>C	0.2	0.27	35	6	145	186	2	0.33	0.03
100033658|F|0--47:A>C	chrUn	379293634	TGCAGAACGCCGTGAAAGGTAAGGCACGCTCATCACCTTTCGCTTTCATGAATGCTGCCATGCTGGTGC	47:A>C	0.33	0.34	54	25	125	204	2	0.44	0.12
100078988|F|0--54:T>A	chr1R	492436677	TGCAGAACGGAATGTGGCATCAAATCGGTGGTGGTGGTTATGAGTTGACCGTGCTTGCTATGGCTAGCT	54:T>A	0.14	0.21	19	21	173	213	2	0.24	0.1
100002935|F|0--56:C>G	chr5R	429996311	TGCAGAACTAATCCAATTTTGGTGCCAGATCACAACTGAAACATCACAAAATTCTACTGACCGCGACAG	56:C>G	0.1	0.16	17	6	176	199	2	0.18	0.03
100146964|F|0--34:C>T			TGCAGAACTATCTGCTGAGCAACCTGGCCCCGTTCGACCCGACGGCGCCCGAGATCGGAAGAGCGGTTC	34:C>T	0.44	0.37	99	14	76	189	2	0.49	0.07
100018631|F|0--66:C>A	chr3R	804567911	TGCAGAACTCATATTCTGTTGACACCTTTCACAATCATCATAACAACAACAAAAGTAGTAGTAATACTA	66:C>A	0.47	0.37	91	6	79	176	2	0.5	0.03
100075392|F|0--18:T>G	chr2R	716348265	TGCAGAAGAAGGTGAGGCTCTTCTTGGAGACGAACGGAGGGAGAGGACAGGTTAAATAGGGAGCGCAGC	18:T>G	0.32	0.34	125	19	54	198	2	0.44	0.1
100007727|F|0--13:G>A			TGCAGAAGAGATGGAAGAATGATGAGTGAGGAGGACCGAGATCGGAAGAGCGGTTCAGCAGGAATGCCG	13:G>A	0.08	0.13	170	12	9	191	2	0.14	0.06
100009836|F|0--10:T>C	chr4R	801432639	TGCAGAAGAGTATCATTGAAACAGACTTCACCTATGTTTATAATAGCTGTTGTGCATTGCTGTGATCGC	10:T>C	0.32	0.34	114	8	51	173	2	0.43	0.05
100010717|F|0--32:T>G			TGCAGAAGATAATGCACCTGCCTATTAGATACTGTTATTGCTCGATTATCATACAGATGAGCTGGTCAC	32:T>G	0.29	0.33	127	6	51	184	2	0.41	0.03
100036421|F|0--55:T>A	chr4R	736905702	TGCAGAAGCATGACGACGGTGCTCGAAGTAGGTGAAGTAGAACCCGAGCGTGATGTAGACCATGCACGG	55:T>A	0.08	0.14	174	11	11	196	2	0.15	0.06
100014385|F|0--40:T>C	chr3R	839389901	TGCAGAAGCGATCTACTACACTAGCCGCCTAGGATAGCATTGAGGAGGAAGGATGGGCGCCGACATGGA	40:T>C	0.15	0.23	177	6	30	213	2	0.26	0.03
100016812|F|0--49:G>C			TGCAGAAGCTCCCGTACGCCAAGCTAGCTAATTAGCTTAAAGCTAGCGGGGACTCGCCGAGATCGGAAG	49:G>C	0.15	0.22	153	14	21	188	2	0.25	0.07
100115678|F|0--16:G>A	chr1R	304299593	TGCAGAAGCTCGGGGTGAAGAAGATCCTGGTGAACCAGCTGCACCCCGTCGGCTGCACGCCGTGGCTCA	16:G>A	0.42	0.37	74	29	106	209	2	0.49	0.14
100008280|F|0--44:T>A	chrUn	360034239	TGCAGAAGGAGGCCGATCAATATATGTAGTAATTTATCTAGTTCTAGTCTAAACGTCACGTAGAGTCGT	44:T>A	0.34	0.35	93	58	33	184	2	0.45	0.32
100047311|F|0--25:G>A			TGCAGAAGGCCGCGCAGATGGGCGCGACGACGAGCAGCCACAACGCTGGCGCCGAGATCGGAAGAGCGG	25:G>A	0.12	0.19	180	18	16	214	2	0.21	0.08
100015934|F|0--16:C>T	chr1R	642078754	TGCAGAAGGCGTCCATCCTTGGAAGGAAGAGGAAGACAAACATGCCCGACGGGCCTTCAACGCCCTGAA	16:C>T	0.16	0.23	147	8	24	179	2	0.26	0.04
100086994|F|0--20:T>A	chr2R	819163813	TGCAGAAGGGGGTGTCCCCCTTGTACATGAAGATGTCGCTGTCGCGCGCCAGCGCCTTGGTGCAGAGCG	20:T>A	0.24	0.3	137	21	35	193	2	0.36	0.11
100072819|F|0--18:A>G	chr4R	862165364	TGCAGAAGGGTGAGAGAGAGAGCGCGCGAAGCAGGTTAAGGTAGCAGCAATGGCGATGACGGAGAGCCT	18:A>G	0.37	0.36	121	16	69	206	2	0.47	0.08
100035220|F|0--28:G>C			TGCAGAAGGTCGGGAATGCCCTCAAGCGGTCCGCGGGCTCCGAGATCGGAAGAGCGGTTCAGCAGGAAT	28:G>C	0.18	0.25	163	24	27	214	2	0.3	0.11
100011293|F|0--28:A>G	chr1R	599997707	TGCAGAAGTAATTTAGGATGTGACATATATTGATTGCTCAATAGCCAGTAGTAGCTAGTATTTTGTGTA	28:A>G	0.21	0.27	18	45	133	196	2	0.33	0.23
100020465|F|0--14:C>A			TGCAGAAGTTATCCCTTGATGCCAAGACTGAAGCCATCGAGGCGCCGAGATCGGAAGAGCGGTTCAGCA	14:C>A	0.23	0.29	153	19	40	212	2	0.36	0.09
100033581|F|0--48:A>T	chr2R	70675817	TGCAGAATAGTGACCGTCATGTCATGCTGTCGAAGACAAGCTACTAGTAGTCAGTGAGTGCTTGTCTAC	48:A>T	0.44	0.37	78	8	102	188	2	0.49	0.04
100005149|F|0--26:T>C	chr1R	608973717	TGCAGAATATACTCCTAGGCCCTAGCTACAACCTTCTGGCATTTTCTAACGGGTTCTACAAATGGCATC	26:T>C	0.38	0.36	60	24	106	190	2	0.47	0.13
100028744|F|0--12:A>G	chr4R	82850084	TGCAGAATATGAACTGCTCACGCGCCATGTGACATGTCTTGTTTTCTCACTCAGTGTGGCGCTGTTCTC	12:A>G	0.38	0.36	70	24	119	213	2	0.47	0.11
100015439|F|0--12:C>T			TGCAGAATATGCCGATGCCGCCCGCCACGGTGCTCCGACCGAGATCGGAAGAGCGGTTCAGCAGGAATG	12:C>T	0.06	0.1	3	16	172	191	2	0.11	0.08
100015439|F|0--28:G>C			TGCAGAATATGCCGATGCCGCCCGCCACGGTGCTCCGACCGAGATCGGAAGAGCGGTTCAGCAGGAATG	28:G>C	0.16	0.23	173	5	31	209	2	0.27	0.02
100054465|F|0--66:G>T	chr3R	836296343	TGCAGAATCTGAATATTTGCACAAAGGCGGAACGCGGACATGACACGCCCGAAAGGGCGCGCGGCGGCG	66:G>T	0.15	0.22	30	4	178	212	2	0.26	0.02
100018362|F|0--43:G>T	chr5R	59010777	TGCAGAATCTTCTAAACAAAGTCGCAACTGATCAGCAGCAGCCGCAACAACAAGGGCAGCAGCACCGCC	43:G>T	0.33	0.34	66	9	139	214	2	0.44	0.04
100001749|F|0--11:T>C			TGCAGAATGTTTGCATGCTGTCCTTTTCTTTTCAAGGCCTGATCCTTGGAACCTCTTTGCCGAGATCGG	11:T>C	0.11	0.18	162	7	18	187	2	0.2	0.04
100017490|F|0--13:T>A	chr6R	846215176	TGCAGAATTAAGCTAAAAAGGACAAAAAGCAGAGTTTGGACGTTGGCTAAAGTTTGTTCCGAACAAAGG	13:T>A	0.23	0.29	128	15	32	175	2	0.35	0.09
100000807|F|0--42:C>T	chr5R	526702849	TGCAGAATTCTATGGATCTTCCTCGAAATATCACTGGGAATACTGGTGATCTTCAAGAACCTGTGGATC	42:C>T	0.13	0.2	21	9	169	199	2	0.22	0.05
100018435|F|0--8:T>C	chr6R	848953226	TGCAGAATTGACGTGCCTTGGAACACCACGTCCACCGTGGTGCCGTGCTTGAACCGCCGCACAATAGTG	8:T>C	0.19	0.26	137	21	25	183	2	0.31	0.11
100023627|F|0--38:C>G	chr6R	639120515	TGCAGAATTGAGATGATGAGATGGTTACTGTGTGCGAACACGAGCGTTGAGAAGGCGAAGTAGAAGATG	38:C>G	0.31	0.34	108	39	37	184	2	0.43	0.21
100016370|F|0--58:G>A	chr2R	842825889	TGCAGAATTGGTCACGCTGGTCGTTCATTCGGCATGTAAGCGCCGTCCTGCTCCATAGGCCACATACCA	58:G>A	0.42	0.37	79	23	112	214	2	0.49	0.11
100001758|F|0--49:A>T	chr1R	334094015	TGCAGACAAAATACACGACGACAGTATGAGACAGACGCAGCAACAACACAACTAGGAGGCTACATGATG	49:A>T	0.38	0.36	109	27	61	197	2	0.47	0.14
100014137|F|0--32:C>T	chr6R	58437842	TGCAGACAAACCCACGACACAGGTGATCAAATCAAGAGCTCGAGCTCGGAAGGAAGTGACACTATAAAT	32:C>T	0.07	0.12	7	14	186	207	2	0.13	0.07
100001514|F|0--38:T>A			TGCAGACAACTCCGAGGTCGACCTTAGTAGCAGTTTCCTTCCATGGATTGGCCTTCATCATTAGCAACC	38:T>A	0.12	0.19	178	11	19	208	2	0.21	0.05
100059981|F|0--29:C>G	chr3R	115375273	TGCAGACACAAGCAAGAGACCACGCACGCCCACGTTTGTTACGGTCGGCTAGAACAACGCGACCTCGGA	29:C>G	0.35	0.35	127	19	65	211	2	0.46	0.09
100010432|F|0--10:A>G	chr5R	660495141	TGCAGACACCAAACGTGATGAATGATTTTGATGAGATTTCCAAGCACCATCCATGTCTGAAATGTGTTT	10:A>G	0.19	0.26	12	51	130	193	2	0.31	0.26
100007869|F|0--55:T>C	chr6R	637144855	TGCAGACACCCATTTCTGCGTCGTAAGAATAGAAGCACATCATCACGTCTGACAGTAGTATAACTCCGT	55:T>C	0.06	0.1	168	11	5	184	2	0.11	0.06
100055321|F|0--34:C>G	chr1R	370420810	TGCAGACACGCGCAAAAGCAGTGTGTCACTGAACCAACAAAACGAACGAAAGTGCACGTCACAGTAGGG	34:C>G	0.19	0.26	138	14	28	180	2	0.31	0.08
100056669|F|0--46:A>G			TGCAGACAGACAGCCTGGTCGGACGGAATCGGTTGGTCAATGTTTTACCGTGGCTCTTTCCGAGATCGG	46:A>G	0.45	0.37	98	25	79	202	2	0.5	0.12
100026454|F|0--13:G>A	chr4R	876799045	TGCAGACAGGTGCGCGCGTCGTGCTGTTGCGCCCAGATCGACCAAGACACGAGCATAAAAAAATAGCAT	13:G>A	0.15	0.23	161	13	24	198	2	0.26	0.07
100037435|F|0--9:C>T	chr2R	198748761	TGCAGACATCGGTGTGATGAGCGGAGCGTCGCTGTACATCCAGAAGGACCTGAAGATCAACGACACCCA	9:C>T	0.31	0.34	126	20	52	198	2	0.43	0.1
100049719|F|0--57:T>C	chr3R	761882749	TGCAGACATCTTCGTGGCCGTGCCTAGGGGGTTGGATGGCGTCCCGCCGTTGCTGGTTCGCACAAGGTT	57:T>C	0.19	0.26	152	16	29	197	2	0.31	0.08
100040320|F|0--24:G>C			TGCAGACCAGACCGCGCGCCGCACGATATGCATACCGAGATCGGAAGAGCGGTTCAGCAGGAATGCCGA	24:G>C	0.07	0.12	176	18	4	198	2	0.12	0.09
100006499|F|0--26:C>T	chr7R	643140744	TGCAGACCATTGACTTGTTATCATCTCGCTCTTCCAATGCTTGTCATCAGCATGTTGTAACCCCTGACG	26:C>T	0.32	0.34	51	10	113	174	2	0.44	0.06
100067476|F|0--37:T>C	chr1R	590572599	TGCAGACCCAAATTAATGTGGGGTGAGATTAGTGGGTTACTCATGACTTTTCACAGTCCCAAGTGCCCA	37:T>C	0.18	0.25	165	19	28	212	2	0.29	0.09
100035335|F|0--19:T>C	chr4R	191357096	TGCAGACCCTGGAATAATGTGGTCGAATCTTGGAAGGGTCGATCGATTGTGTCCATGTTTAGTCGTCGC	19:T>C	0.13	0.2	173	26	15	214	2	0.23	0.12
100061607|F|0--19:A>G	chr7R	751419598	TGCAGACCCTTGCGAGGCGAGTCCTGAGGCAGACGTGCTTCGGCGCCACCAGGTACAACATCGACTGGA	19:A>G	0.48	0.37	97	25	87	209	2	0.5	0.12
100078009|F|0--31:C>G	chr2R	917142038	TGCAGACCGCCCCGTCATCGAACAGCACATCCACGTCGATGGACACCTCGACGACCTGGCCGAGCCACG	31:C>G	0.08	0.14	15	4	194	213	2	0.15	0.02
100012729|F|0--68:T>G	chr3R	851677149	TGCAGACCTCCCTGGATTCACCTACATATAGAGTCACAGAGACCATGAATCTTCGACCGCATAGCTCTT	68:T>G	0.25	0.31	149	19	44	212	2	0.38	0.09
100023851|F|0--43:G>C	chr1R	335370619	TGCAGACCTCGCGCAAGAGGTACTTCGTGCTCGAGGACTCCGCGCTCCGCTGCTTCAAGGCCGCCCCGA	43:G>C	0.18	0.25	153	19	26	198	2	0.29	0.1
100064047|F|0--38:G>A			TGCAGACCTGCTCGGGCAGTCCTCAGCTTTTCTTTTGCGGCCGAGATCGGAAGAGCGGTTCAGCAGGAA	38:G>A	0.06	0.1	179	15	4	198	2	0.11	0.08
100053160|F|0--64:A>G	chr5R	494380228	TGCAGACCTGGGCACGAACAGAGGGCTGTCGTACATCGACATGAGCGACAACCTTCTTGAAGGGAGGAT	64:A>G	0.45	0.37	104	17	85	206	2	0.5	0.08
100005715|F|0--10:C>T			TGCAGACCTTCATCAGCGTCACCATCGTGGCATTCATCCCGAGATCGGAAGAGCGGTTCAGCAGGAATG	10:C>T	0.27	0.32	49	17	145	211	2	0.4	0.08
100015545|F|0--43:A>G			TGCAGACCTTTTTATCCAGCAGCACATCTTGATATCCTAGCTTAGTTGTTGATGAAGAATTTAGTAAAT	43:A>G	0.22	0.29	33	15	134	182	2	0.35	0.08
100016546|F|0--21:C>T			TGCAGACGAAGTGTAGCAATTCTGGTGAGCAAAAGCTAAAGCGACGTGCGTGGCCTGCTCCCGAGATCG	21:C>T	0.2	0.27	37	13	164	214	2	0.32	0.06
100044467|F|0--5:A>G	chr5R	404309991	TGCAGACGAATTGACCTGCTGTGGAATTGCATTTATTTTTGTCGTCATCATGGTGGCCGGAGCACCAGG	5:A>G	0.42	0.37	64	19	94	177	2	0.49	0.11
100076208|F|0--38:A>T	chr4R	898726409	TGCAGACGACACCACAATGCACAGGGAGACCACCATCGACAGTTTCCCCCTCGCGTCGCGTGATGGCCT	38:A>T	0.29	0.33	57	12	145	214	2	0.42	0.06
100115369|F|0--19:C>G			TGCAGACGAGGGAGCAGCTCAGGAGGTCGACGCAGTCCAGCTGCGAGAAGACCCGAGATCGGAAGAGCG	19:C>G	0.14	0.22	174	17	22	213	2	0.25	0.08
100012717|F|0--41:C>G	chr4R	55998898	TGCAGACGATCGAGTCGGCCATGATGGTAGGCAATGCCTTACAGGAGACATAGAAAGCTCTTTCATCGA	41:C>G	0.47	0.37	84	21	97	202	2	0.5	0.1
100011053|F|0--65:T>C	chr6R	509209611	TGCAGACGCAGAAGCAGCAGTGTTGATGAGGTTAAGAATTTGATTGATGTCAGAAACGCTCGCAGTAGG	65:T>C	0.11	0.18	175	11	17	203	2	0.2	0.05
100042559|F|0--10:C>A			TGCAGACGCTCTTGGCGATGAACCAGGTGGCGGAGCACATGGTCCTCACCGAGATCGGAAGAGCGGTTC	10:C>A	0.37	0.36	107	18	59	184	2	0.47	0.1
100067961|F|0--19:G>C	chr1R	25406282	TGCAGACGCTGCTCATCCTGCTCCTCAGCCGCGTGCTCGCCCTGCTCCTCCGCCCGCTCCGCCAGCCCA	19:G>C	0.26	0.31	157	2	55	214	2	0.39	0.01
100003417|F|0--5:A>G	chr2R	754013309	TGCAGACGGAACATGCATGCAGATGCAGTACAAGGAAATGACACCAAAATCGGTGCAAGAGATGAATCA	5:A>G	0.36	0.35	120	18	62	200	2	0.46	0.09
100041268|F|0--64:T>G	chr1R	439427024	TGCAGACGGAGGCGCAGAGCTTCGACGTGCCCAGCGCCGACATGATCTACAGCCTCGCCTACCTTCCGC	64:T>G	0.15	0.22	29	6	179	214	2	0.25	0.03
100020179|F|0--42:T>G	chr4R	612009180	TGCAGACGGCAGCTTATTGAGGGACTAGTTTAAAGCGAGGGCTGCAATGCGCTGGGTCCGCGAAGGCCG	42:T>G	0.41	0.37	75	24	115	214	2	0.48	0.11
100029052|F|0--32:G>T			TGCAGACGGGCGTGCAATCTGAGTGTGGAGAAGGCCACCGATCGACACCTTTGGCCGAGATCGGAAGAG	32:G>T	0.24	0.3	37	19	141	197	2	0.36	0.1
100054335|F|0--31:A>T			TGCAGACGTCGCGTGGTGCACGCCCACCTCGATCCCGTCGCCGAGATCGGAAGAGCGGTTCAGCAGGAA	31:A>T	0.3	0.33	41	27	112	180	2	0.42	0.15
100017218|F|0--55:T>C	chr3R	867883443	TGCAGACTAAACTGATAAATCATGTTCAGTAATAAACTAGGCATGCTGAAATTGATATTCACTACTAGT	55:T>C	0.37	0.36	113	21	62	196	2	0.47	0.11
100068970|F|0--39:C>G			TGCAGACTACTGTCAAATCCGACGAACAATCATGAGCGGCTGCGCGCCCTCCCTCCGAGATCGGAAGAG	39:C>G	0.18	0.25	26	13	145	184	2	0.29	0.07
100014299|F|0--30:A>T			TGCAGACTAGCAACGCTGGAATTCGCGGGGATTAACGGATGCATGCAGAATGCATGCCGAGATCGGAAG	30:A>T	0.09	0.16	17	5	185	207	2	0.17	0.02
100014299|F|0--31:T>A			TGCAGACTAGCAACGCTGGAATTCGCGGGGATTAACGGATGCATGCAGAATGCATGCCGAGATCGGAAG	31:T>A	0.07	0.12	183	16	6	205	2	0.13	0.08
100010328|F|0--30:T>C	chr7R	56743591	TGCAGACTCCCAGTCGCTGAGCTCTCAAGGTTCTACCAGCGGGAGCACTTTCGAGAGCCGAGATCGGAA	30:T>C	0.3	0.33	135	31	48	214	2	0.42	0.14
100001205|F|0--23:C>A	chr4R	38739998	TGCAGACTCTGCATGCTTGATCACGCTCTTCATGCGCTCCTCGAACATGCCGCGCCACTTGGTCCCTGC	23:C>A	0.06	0.11	195	11	8	214	2	0.12	0.05
100003980|F|0--16:G>T	chr3R	690252804	TGCAGACTCTTTCCTAGTTCTAACAGGAAGCTACTGCACCGTGGCGTCCAATATTTCTCTGTTGCAACC	16:G>T	0.1	0.16	12	19	183	214	2	0.18	0.09
100079471|F|0--57:T>G	chr3R	107176724	TGCAGACTGGGCAATAATAAGTTTAACCGCCTGATGTGATGTTGTGCGGCGCAAAGTTGGAGGAGGAGG	57:T>G	0.4	0.36	122	13	78	213	2	0.48	0.06
100034030|F|0--17:G>C	chr6R	147215	TGCAGACTGTGGGTCTTGGACGATGCTGGAGACGAGCTCGTAGGCGCTGCCAATGGCGTACTCCATGCC	17:G>C	0.43	0.37	112	20	81	213	2	0.49	0.09
100013205|F|0--53:G>A	chr3R	902662395	TGCAGACTTGCAGTAGTTCGCAAACACATTTCCAGGGACGATATTATTTTTCAGAGCCTTTTGGCGTCC	53:G>A	0.07	0.12	192	13	8	213	2	0.13	0.06
100006597|F|0--21:G>C	chr7R	202305620	TGCAGACTTGTCGTACTGCATGAGTAGCTTCCACACATGCACTGACACATACGTGAAAGAATCGTACGG	21:G>C	0.46	0.37	103	24	87	214	2	0.5	0.11
100017298|F|0--32:A>G	chr5R	41417026	TGCAGACTTTCTCTCGAAATGGAAGACTGTCCACTCTTTTGCTTTTCCTGCGGCACCAAAGGTCACATT	32:A>G	0.18	0.26	33	12	166	211	2	0.3	0.06
100001583|F|0--27:T>A	chr7R	546351742	TGCAGACTTTGTCCATTCTTCTCCCCATCAGTAGCAACCAAAATTTGTGGTCCTTTACGCTTCAACTGA	27:T>A	0.08	0.14	187	16	10	213	2	0.15	0.08
100000407|F|0--18:T>C			TGCAGAGAAAAGCATGCATAACCTCCCATGTTTCCATCCGAGATCGGAAGAGCGGTTCAGCAGGAATGC	18:T>C	0.15	0.22	152	31	13	196	2	0.25	0.16
100035764|F|0--17:C>G	chr7R	254292313	TGCAGAGAAAGCAACGTCGGAACTGAAACAGCGTCGGCCGCCTTATGTAAACCCAAACCTCCCACCGAG	17:C>G	0.38	0.36	69	26	118	213	2	0.47	0.12
100006305|F|0--30:C>G	chr3R	718596300	TGCAGAGAAAGGGATCATCCAGAGGTACACCGCAATCCTCGACAAGACCATCAACCTGGGGATCAAGCA	30:C>G	0.07	0.12	6	16	188	210	2	0.12	0.08
100005282|F|0--5:A>C			TGCAGAGAAATCATGCCGCTTCTCAGATCTCCTGTTATGACCGAGATCGGAAGAGCGGTTCAGCAGGAA	5:A>C	0.13	0.2	19	7	152	178	2	0.22	0.04
100004062|F|0--8:A>C			TGCAGAGAACAGACGCTGTTTGATTCGATCGCCATCTTTCTCCTTCCGTTCCGAGATCGGAAGAGCGGT	8:A>C	0.25	0.3	35	35	144	214	2	0.37	0.16
100003877|F|0--36:A>G			TGCAGAGAAGGCAAGACAGGAGTCTGTCGATGCTCCAAATGTATAGCAATATCAAACGAGTCCGAGATC	36:A>G	0.46	0.37	69	33	83	185	2	0.5	0.18
100015816|F|0--35:C>T	chr7R	606546706	TGCAGAGAAGGGGCTTGGTCAACGGGTACTTCTGTCAGCTCTGCATGCGACAACTGGAGAGTTCCGTTC	35:C>T	0.12	0.19	11	28	175	214	2	0.21	0.13
100026758|F|0--10:A>T	chr7R	19712631	TGCAGAGACAACTGGTGGAGCACCCAAGAGAAGTACACTCAACACTCCAAAACAAGTTGCAAAGACATC	10:A>T	0.26	0.31	37	16	123	176	2	0.38	0.09
100008617|F|0--17:A>T	chr5R	709567868	TGCAGAGACAGTTCTTCACTGACGAATTCTTTTCCTTGCAGAATGATCAGCATTTGTTCCATTGGCGCT	17:A>T	0.3	0.33	33	64	117	214	2	0.42	0.3
100008361|F|0--5:A>C	chrUn	152677612	TGCAGAGACCCTTCCTATACCGCCCTGCTCGATCTACTCTGCACGCACACTGTTTTCTCTCCCACTTTG	5:A>C	0.1	0.17	16	6	160	182	2	0.19	0.03
100044756|F|0--19:C>T			TGCAGAGACTGTAGCTGCGCCTTGCCGCTGAGGCCGCGCTGCCGAGATCGGAAGAGCGGTTCAGCAGGA	19:C>T	0.24	0.3	41	20	153	214	2	0.36	0.09
100031800|F|0--59:G>A	chr7R	854668386	TGCAGAGAGAAGTAGTACGCCCTGCGCCATCCGTTGGTGATCTAACGACATTCGCTGGTGCTACAACCA	59:G>A	0.19	0.26	136	6	30	172	2	0.31	0.03
100002102|F|0--8:G>T			TGCAGAGAGATATACGAGAATGCGTACGTGCAGTGCAAGCTCCGAGATCGGAAGAGCGGTTCAGCAGGA	8:G>T	0.38	0.36	65	11	112	188	2	0.47	0.06
100075767|F|0--6:G>A	chr4R	55998895	TGCAGAGAGATGGAGTCTCGCGAATTTGCCCAGTACCACCTCAGGAGCGGCACTTGGTCTCAAGCAGTC	6:G>A	0.12	0.19	167	1	22	190	2	0.21	0.01
100008844|F|0--28:C>G			TGCAGAGAGCCACCAAAGGAGATGCCGCCGCTTCCCTTCACCGAGATCGGAAGAGCGGTTCAGCAGGAA	28:C>G	0.37	0.36	66	25	119	210	2	0.47	0.12
100086929|F|0--40:A>C	chr3R	248953770	TGCAGAGAGCCGCGCAGATCGGCTCCGTCACATCCTCCAAAACCTCGATGCCGCTCGCGGGGGCCTTTG	40:A>C	0.39	0.36	66	34	114	214	2	0.47	0.16
100063086|F|0--57:A>G	chr3R	813673987	TGCAGAGAGCGAGCAAGCAGCTGATACACCTCTGCGAGCCCGCAATGTCGACTAGCTACCGCGCTCCGA	57:A>G	0.1	0.16	160	11	13	184	2	0.18	0.06
100079466|F|0--29:A>G	chr4R	206232449	TGCAGAGAGCTGACAGCGCTCGTCCTTGGACTGAGTTTAAGATTGACTCGGCGGCGGCTCACTACAGAT	29:A>G	0.27	0.32	42	13	123	178	2	0.4	0.07
100022035|F|0--23:A>T			TGCAGAGAGGCAAGCGAATCGACAGCGCCCTTTGCGAACCAACTGACTCCGACCTTCACCCGAGATCGG	23:A>T	0.16	0.23	27	8	163	198	2	0.26	0.04
100036931|F|0--30:C>G			TGCAGAGAGGCGAGCAGAACGTCTTCTTCTCTTTCTGTTGCGATCACGACGTTCTCGGACCCGAGATCG	30:C>G	0.2	0.27	25	20	131	176	2	0.32	0.11
100024272|F|0--46:T>C	chr1R	615459432	TGCAGAGAGGGCACATCTCGCTCTCTCTGAGGGTTTCCGCCAGGCATGCGCCATGGAAGACGTGGGGCA	46:T>C	0.27	0.32	145	16	50	211	2	0.4	0.08
100024272|F|0--52:A>G	chr1R	615459432	TGCAGAGAGGGCACATCTCGCTCTCTCTGAGGGTTTCCGCCAGGCATGCGCCATGGAAGACGTGGGGCA	52:A>G	0.05	0.09	3	12	163	178	2	0.1	0.07
100016521|F|0--41:A>G			TGCAGAGATTACTTCGGGTTAGGCGTTTCCTCAATTTTTTTATAACTTCCCGAGATCGGAAGAGCGGTT	41:A>G	0.29	0.33	45	16	124	185	2	0.41	0.09
100007550|F|0--21:A>T	chr6R	420563661	TGCAGAGATTCCTTTGTCGCCAATAAGTATACAGTTTGAGTATTTTGGCTGCGCACTTGTGTGCCTTTG	21:A>T	0.26	0.31	47	17	150	214	2	0.38	0.08
100003858|F|0--17:A>T			TGCAGAGATTGCAACACATGATAGCCTGCAATATCTTCTGCTTGGTGGCAACAAGCTCACCGAGATCGG	17:A>T	0.24	0.3	36	18	137	191	2	0.36	0.09
100047941|F|0--61:T>A	chr6R	812549000	TGCAGAGCACACGGACGACGCCGAATCAGCCACGGCTGTACGTACAATTACAACCACGACCTAGCGTCC	61:T>A	0.49	0.37	91	20	88	199	2	0.5	0.1
100064997|F|0--46:C>A			TGCAGAGCACGCCGACGCCGAGCGGCACGATGTCCAGCACCTCCTCCGTCTCTCTCGCCGAGATCGGAA	46:C>A	0.08	0.14	185	22	7	214	2	0.15	0.1
100079462|F|0--52:G>A	chr1R	561058194	TGCAGAGCACGGGTGTAGTATGTACTATGAATTATGATGGTCGTGTCAGGGCGTAGATGAGGCGTGCAC	52:G>A	0.41	0.37	100	12	68	180	2	0.48	0.07
100014804|F|0--8:A>C	chr1R	408847340	TGCAGAGCAGCGCACACCTGAGCCGCCGCTTCGTCCTTGTCGCCGTCCAGCCTTCCCCTCAGGACCCGA	8:A>C	0.47	0.37	103	12	90	205	2	0.5	0.06
100003303|F|0--55:T>C	chr3R	30109304	TGCAGAGCAGCTCTGCCACTTTCTCTTTGCTTACTTAACAGATAACAGTTGTTAGTGCGTAGTCATGAG	55:T>C	0.36	0.35	106	15	56	177	2	0.46	0.08
100021847|F|0--45:C>T	chr6R	9954439	TGCAGAGCATCCCTCCAGATATCCCATCGCCTCCTCGATTCCTTCCAGATTGTACGCGTCACGCAGCAT	45:C>T	0.37	0.36	127	16	70	213	2	0.46	0.08
100002752|F|0--38:T>C	chr2R	18243805	TGCAGAGCATCGATGAACCTCATGACACCGTGAAGGTCTGATGCCACCTCAAAGCTGATGATGCCGCCT	38:T>C	0.48	0.37	87	25	79	191	2	0.5	0.13
100043171|F|0--55:C>G	chr6R	646664474	TGCAGAGCATGGAGGAGCCGTCCATGGCCGACCCGCCGCGGATCTTCTGGAAGTCCAGGAGGAGGCCGT	55:C>G	0.48	0.37	88	13	94	195	2	0.5	0.07
100031712|F|0--9:A>C	chr7R	572369102	TGCAGAGCCACGGACAGCGAGCCGTAGCCGCAGTGTGCCTTCAGGTCAATCTTCCTCCCAACGGCGTAC	9:A>C	0.19	0.26	28	21	159	208	2	0.3	0.1
100021022|F|0--34:C>G			TGCAGAGCCGCCAGAACCCGACCTTCTACTACGTCCCGTTCACCGAGATCGGAAGAGCGGTTCAGCAGG	34:C>G	0.33	0.34	67	6	141	214	2	0.44	0.03
100011963|F|0--19:C>G	chr5R	537479957	TGCAGAGCGCCATCCAGGCCGCCATCGCGCACTGCAAGAACTCCATCGCCGTGGCCAAGCAGTAGTGCG	19:C>G	0.43	0.37	87	9	118	214	2	0.49	0.04
100061599|F|0--18:T>C	chr6R	868123711	TGCAGAGCGCGACCTCCATAGTGAGCCGCCTCGACCACCCCCATAACAGGCCTGCCTCCCCGCGATGCC	18:T>C	0.24	0.3	41	11	142	194	2	0.36	0.06
100012525|F|0--31:G>C			TGCAGAGCGTCTCCAAGGTGATGAAGTTTGCGGAGCTGCTGGTGGCCCCCAAGTCCCCGAGATCGGAAG	31:G>C	0.26	0.31	139	25	41	205	2	0.39	0.12
100005449|F|0--7:C>T	chr2R	250440893	TGCAGAGCGTTTTAATGGCCGCACAGTGAAACTGCGTCCCTTTCCCTATCATCGCCTTCAATGAGCCAG	7:C>T	0.41	0.37	106	23	69	198	2	0.48	0.12
100056935|F|0--28:C>G	chr6R	97197634	TGCAGAGCTACTGCTTCGCCAAGATGGCCGAGGTCGGGTCCCGCCCCTGCATCATCGACGGCCAGACGG	28:C>G	0.32	0.34	134	23	57	214	2	0.44	0.11
100054457|F|0--45:G>A	chr1R	578669780	TGCAGAGCTAGCAAGCATCACGCGGTTTGGAGTTCGACTCCCATCGCCTGCGCTTTTCTTTTTTCGATT	45:G>A	0.26	0.31	42	25	143	210	2	0.38	0.12
100003616|F|0--21:A>G			TGCAGAGCTAGCAGCTAGCAGAACCGCTGATCATCCCGAGATCGGAAGAGCGGTTCAGCAGGAATGCCG	21:A>G	0.18	0.25	30	18	166	214	2	0.3	0.08
100089433|F|0--14:A>G	chr2R	888769304	TGCAGAGCTCCGACACGCCCAACGGCCCGCTCAAGCTCTCCCTCCAGCTCGTCAGCGCCACCGTCGCCG	14:A>G	0.2	0.27	28	18	140	186	2	0.32	0.1
100011530|F|0--13:C>G	chr2R	908240833	TGCAGAGCTCCTGCGTGGTGTTGCCGTTGAAGCCACAGATGTCGGCGCCCATCATTGGGATGCCGAAGA	13:C>G	0.1	0.16	18	7	189	214	2	0.18	0.03
100035513|F|0--61:G>A	chr2R	908443168	TGCAGAGCTCCTGGCTTGTGTTACCCCTGAAGCCGCATATGTCGGCGCCGATCATGGGGATGCCAAAGA	61:G>A	0.42	0.37	104	22	72	198	2	0.49	0.11
100000631|F|0--35:T>C	chr2R	720238630	TGCAGAGCTCTGCCTGCACAATTAAATTTCAGGAATTCAATGGATTTCCACACAAGAAAAAACAGTCCG	35:T>C	0.07	0.12	158	8	8	174	2	0.13	0.05
100016792|F|0--31:A>C	chr4R	867281269	TGCAGAGCTGCGGATATCACGTTGGCGGCCAAGGAATACCTGAAGGAGTTGTAGTCGCTGTAGGAGACC	31:A>C	0.14	0.21	7	45	162	214	2	0.24	0.21
100051228|F|0--52:G>A	chr5R	13374218	TGCAGAGCTGGTTGCCCGAAGAGTGGATGGACGGTGCAAGGATGTCATCGGGGCAGAAAGCTTGCCGAT	52:G>A	0.17	0.25	159	6	31	196	2	0.29	0.03
100003059|F|0--16:C>T	chr3R	883695125	TGCAGAGCTTGCGCGGCCGCACCCATCTGATCCCGCTGGGGCACCGCCTGTACGCGCTCAACAAATTCA	16:C>T	0.08	0.14	7	15	159	181	2	0.15	0.08
100005474|F|0--6:G>A	chr6R	779094750	TGCAGAGGAAAAGTAAAGGAAAAGGAAAGAGCCAGACGTGAATTTTCTAAAAGACGTCTACGACCCGAG	6:G>A	0.36	0.36	116	12	64	192	2	0.46	0.06
100005474|F|0--60:C>A	chr6R	779094750	TGCAGAGGAAAAGTAAAGGAAAAGGAAAGAGCCAGACGTGAATTTTCTAAAAGACGTCTACGACCCGAG	60:C>A	0.15	0.22	145	7	22	174	2	0.25	0.04
100001351|F|0--40:G>C	chr7R	892692163	TGCAGAGGAAGACTTCCTCGGACACCACTCTTGCGCACATGAAGGTGCCAAAAGGAACTATGATAACGA	40:G>C	0.1	0.17	165	6	16	187	2	0.18	0.03
100045587|F|0--10:T>C	chr3R	745214284	TGCAGAGGAATACCATACCAGCTTGGCGCATGATGGATCGGTCGCGATGTGAAGTGAAACATCCGAAGG	10:T>C	0.35	0.35	59	7	113	179	2	0.45	0.04
100081865|F|0--10:T>C			TGCAGAGGAATGGCAAGAGCTGCCGGCTGCGTTGGATCAACTACCTGCGGCCCGAGATCGGAAGAGCGG	10:T>C	0.1	0.17	153	8	14	175	2	0.18	0.05
100015225|F|0--6:G>A	chr2R	804569598	TGCAGAGGACAGTAAGTTTCCTCAGCCTCTGAATCCGAGATACACGCCTCCATTCCCAGAATGCTGCAT	6:G>A	0.44	0.37	107	16	83	206	2	0.49	0.08
100046880|F|0--62:C>G	chr5R	873860607	TGCAGAGGAGCGAGCAACTGAGGGAGCTCTATGAGTCGCTCTTGTCCGGCAAGGCGGACCACCGTGCGA	62:C>G	0.3	0.33	61	3	145	209	2	0.42	0.01
100015858|F|0--65:A>T	chrUn	60900160	TGCAGAGGATGATGGCTTCCTTGCAAGGTGCAACCACTTTGCTCCTGGCAATGCATCTGGTCTTGATTT	65:A>T	0.44	0.37	82	21	107	210	2	0.49	0.1
100072131|F|0--26:C>A			TGCAGAGGCAAGGAGCAGAGAGTGGGCATGGACGTCGTCGCCCCGAGATCGGAAGAGCGGTTCAGCAGG	26:C>A	0.48	0.37	93	15	86	194	2	0.5	0.08
100047396|F|0--22:G>A	chr7R	838986628	TGCAGAGGCATGCGTATAACGTGTGAGGAATAAAGGTGATTAAAATCAACTAACATGGTAATCACTAGT	22:G>A	0.33	0.34	121	9	56	186	2	0.44	0.05
100048210|F|0--49:T>G	chr7R	96883969	TGCAGAGGCATGGGCACAAGCATGTCCATTACTCCCCATCATGCACGCATACGGACGGATGGCCCTGGC	49:T>G	0.45	0.37	89	14	110	213	2	0.5	0.07
100023459|F|0--22:T>C			TGCAGAGGCCTGCAAGCACCACTAATGCAAGCAAAGACACGGTATGCAGTACTGGTGTACACGGTTTCA	22:T>C	0.4	0.37	66	10	101	177	2	0.48	0.06
100009460|F|0--17:G>A	chr4R	664519021	TGCAGAGGCGCTTGGGTGTACGCTCTTCTCATCTGAAGTGTAAGGACTACTGTTTGATATCGCCAACAC	17:G>A	0.09	0.15	188	11	14	213	2	0.17	0.05
100067946|F|0--54:C>G			TGCAGAGGCTAGACACACACACAGACACGACGTACAGCTTCCTCCTACCTCGCCCTCGCCGCCGAGATC	54:C>G	0.32	0.34	114	7	53	174	2	0.44	0.04
100016608|F|0--43:C>G	chr7R	132365776	TGCAGAGGCTGCCTGACAAGTTTACCAGGGTGCTACTAGACGGCAGCAAGCCCCAGGAAGTGAAGCTGC	43:C>G	0.23	0.29	44	12	158	214	2	0.36	0.06
100049610|F|0--33:A>T	chr1R	375402807	TGCAGAGGCTGCTGAAGTTGTCTGGAACCGTGGACTTCTCAAGCGAGTTGGAATATGCCACGGTATAAG	33:A>T	0.35	0.35	58	22	116	196	2	0.46	0.11
100008024|F|0--13:G>A			TGCAGAGGGACATGGGGTTGGGGCTTTATCCTTCGGGACCAATCCGAGATCGGAAGAGCGGTTCAGCAG	13:G>A	0.46	0.37	97	33	79	209	2	0.5	0.16
100008428|F|0--63:C>T	chr6R	690197962	TGCAGAGGGAGAGAGGACTGGTGACCAATAATCTCTTGGTAATGTAGCACTAGGCAAGGTTTTCAATTT	63:C>T	0.39	0.36	59	16	98	173	2	0.47	0.09
100032438|F|0--41:A>G			TGCAGAGGGAGCCATGTGTCCGTTTCCCGAAGCGTGAAAACATCCCGAGATCGGAAGAGCGGTTCAGCA	41:A>G	0.33	0.34	112	22	49	183	2	0.44	0.12
100045444|F|0--63:T>C	chr7R	777416063	TGCAGAGGGAGGAGGCAATCGGGATCGATGCAGTCAGATCGCTGTTAAGTTATGCATAGTGAGTTGTCT	63:T>C	0.19	0.26	141	4	31	176	2	0.3	0.02
100025111|F|0--29:C>T			TGCAGAGGGATCGGAGTCAAGGGGGCAAGCAGGATGTGGCCAGCTGATTTCTTCGCCGAGATCGGAAGA	29:C>T	0.08	0.14	10	10	163	183	2	0.15	0.05
100011437|F|0--37:G>A	chr3R	150959040	TGCAGAGGGTCATCAAGCAGGAGTTCTCAGGGTGCACGGTGATCACCATAGCACACAGGGTTCCCACCG	37:G>A	0.08	0.14	164	19	6	189	2	0.15	0.1
100068188|F|0--18:T>G	chr6R	142464365	TGCAGAGGGTCTAAAGGATGGGGTGATCATGAGCAAGCAGGAGAGTACAGACTCTAATCGTTTCAGGAC	18:T>G	0.28	0.32	53	14	147	214	2	0.4	0.07
100074555|F|0--8:G>C	chr4R	147779397	TGCAGAGGGTGGTATACGCGGAGCGCCAGGAGGAGCTGACAGAGGCCGCACGCATGAGGTCAGGTATCT	8:G>C	0.25	0.3	47	9	154	210	2	0.37	0.04
100006440|F|0--33:C>A	chr2R	663834085	TGCAGAGGTGCTCCTCAAAGGTGAGCACCAACTCTTGTTTTGGATTTACCCAGAAATTTCAGTGTTTAT	33:C>A	0.05	0.1	183	9	6	198	2	0.1	0.05
100084866|F|0--29:G>C			TGCAGAGGTGGTGACCGCTCGATGAGCTCGGACACGTCGGCGCACGGCAGCAGGGCCGAGATCGGAAGA	29:G>C	0.49	0.37	83	19	78	180	2	0.5	0.11
100041128|F|0--15:G>T	chr3R	835685732	TGCAGAGTAACCGTGGCGGAGTTTGTTTCTGCACCTCTCGTTGGCTGGAGCCTGGGAACGATATCCACG	15:G>T	0.33	0.34	65	9	139	213	2	0.44	0.04
100043375|F|0--64:G>C	chrUn	190603804	TGCAGAGTCAAAATTCCCCAATGCCCATTGCTTCCCGTCTCCTTCCTTCCCCACGAATTTAGTAGTCGT	64:G>C	0.39	0.36	105	10	66	181	2	0.48	0.06
100026662|F|0--16:G>T	chr3R	153751905	TGCAGAGTCCATCGCGGTACTATGTCTCTCTCGAGGGCATATCGCTCGGTGACGTTCGCCTGCCGATCC	16:G>T	0.05	0.09	4	10	159	173	2	0.1	0.06
100066495|F|0--45:G>C	chrUn	358742916	TGCAGAGTCGCGCGCCATCACCAGGTACATCGCGACCAAGTACGGGGCGGAGCTGCTGCCGACGCCGTC	45:G>C	0.47	0.37	84	8	96	188	2	0.5	0.04
100016466|F|0--16:C>T	chr3R	738555190	TGCAGAGTGAAAGGCACGATCGACTCAATGATTGTTCATCTGACATATATGGCGATATTTGATTTGAAT	16:C>T	0.47	0.37	87	11	78	176	2	0.5	0.06
100090911|F|0--58:C>G	chr7R	839406636	TGCAGAGTGAGACGGGAGCCGACGTCACCTTTCTTGTGGGCGACGAGTCTTTTGCTGCCCATAAGAACA	58:C>G	0.32	0.34	59	19	133	211	2	0.44	0.09
100028163|F|0--35:T>A	chr3R	652362003	TGCAGAGTGCTCTGGGACTTGTCCGCATGTGGAATTTGGTGTTTATTTATGTTTTGTTCCCCTTGGAAA	35:T>A	0.12	0.19	151	9	17	177	2	0.21	0.05
100012313|F|0--33:T>A	chr1R	308350642	TGCAGAGTGCTGCAATGGCCTACAGAGAAGCTTTTTTCTTTTTTCTTTCCGAGATAATGTTGGCACTTT	33:T>A	0.45	0.37	77	17	94	188	2	0.5	0.09
100002491|F|0--21:T>G			TGCAGAGTGGAAGGGAAGCCATACTTTGTTGAGTGACCGAGATCGGAAGAGCGGTTCAGCAGGAATGCC	21:T>G	0.29	0.33	115	21	42	178	2	0.42	0.12
100002491|F|0--32:G>T			TGCAGAGTGGAAGGGAAGCCATACTTTGTTGAGTGACCGAGATCGGAAGAGCGGTTCAGCAGGAATGCC	32:G>T	0.27	0.31	42	11	126	179	2	0.39	0.06
100033224|F|0--7:T>A			TGCAGAGTGGGGTGTACGGCCGATTTTATCGCATGCACCCGAGATCGGAAGAGCGGTTCAGCAGGAATG	7:T>A	0.09	0.15	181	10	13	204	2	0.16	0.05
100058378|F|0--28:C>A	chr3R	801822788	TGCAGAGTGTGGATCGCGTCGTCTACATCTGGTAAATTCGTCCGAAACACTCGAGGGCTTCTTCTGTCC	28:C>A	0.09	0.16	182	9	15	206	2	0.17	0.04
100058378|F|0--46:A>G	chr3R	801822788	TGCAGAGTGTGGATCGCGTCGTCTACATCTGGTAAATTCGTCCGAAACACTCGAGGGCTTCTTCTGTCC	46:A>G	0.07	0.13	11	5	167	183	2	0.14	0.03
100021179|F|0--36:G>A	chr3R	92961403	TGCAGAGTTCCCACGTTGATTGTCGAGCACATGACCGTGTTTCTGCTGCTTTGATTATTGGGGCCGATC	36:G>A	0.13	0.2	177	8	23	208	2	0.23	0.04
100005786|F|0--44:G>A	chr2R	840353958	TGCAGAGTTGGACAAATAGAGACGTTCGTACGATACGACGTTCAGCCTGCATGCATGTGCTTCCACTGT	44:G>A	0.15	0.23	170	20	23	213	2	0.26	0.09
100064993|F|0--56:T>C	chr1R	718456425	TGCAGAGTTGGACTTGGAGTGCTCCTCATCGTCTTCCTCCCGCTGCTTCAGCTCGATGGTGCAGTCAAT	56:T>C	0.16	0.24	138	15	21	174	2	0.27	0.09
100064993|F|0--63:G>A	chr1R	718456425	TGCAGAGTTGGACTTGGAGTGCTCCTCATCGTCTTCCTCCCGCTGCTTCAGCTCGATGGTGCAGTCAAT	63:G>A	0.23	0.29	131	11	36	178	2	0.36	0.06
100012575|F|0--8:T>C	chr6R	461792795	TGCAGAGTTTAATTACGACTTGAGGACGACTGGCCACTTTCTTAATCTATATATCTCCTGCATTGGCGG	8:T>C	0.17	0.25	162	8	31	201	2	0.29	0.04
100019891|F|0--12:C>A	chr3R	879093657	TGCAGAGTTTGACTGTGCATGCCACTGTCTGTGCCCAATACTTGAGCCGAGCTTTCACCTGGTCTGGAT	12:C>A	0.2	0.27	139	7	32	178	2	0.32	0.04
100008940|F|0--27:G>C	chrUn	161518039	TGCAGATAACAAAATAAGGAACACCAAGATAATTTTCAGCAAATCAGCGTAGAGGTTGTTGTTATTGAA	27:G>C	0.06	0.1	159	12	4	175	2	0.11	0.07
100024162|F|0--16:C>T	chr4R	732199282	TGCAGATAATATTTGGCGGCGGCGGCGCCAGTGAGCAACCTGAAGAGGAGCCTTCAATGATGACCAATG	16:C>T	0.1	0.16	15	4	159	178	2	0.17	0.02
100001487|F|0--10:T>C			TGCAGATAATTTACACCTATTTTTCGGGTCAAATATCCGAGATCGGAAGAGCGGTTCAGCAGGAATGCC	10:T>C	0.45	0.37	96	29	75	200	2	0.49	0.14
100016520|F|0--22:A>T	chr1R	557859147	TGCAGATACATAGAGAATTATAAATTCAGATTAGGCTCATGCTTACAACAAGACTTTGGTCTTAAAATT	22:A>T	0.37	0.36	108	12	62	182	2	0.47	0.07
100012524|F|0--25:G>C	chr5R	479723536	TGCAGATACCAACGGGCAAGTTCTTGAGAACTTGAATGCTACTGTATATGTCTCAATCACTGAAACTAA	25:G>C	0.35	0.35	59	12	116	187	2	0.45	0.06
100008569|F|0--8:C>G	chr4R	130609396	TGCAGATACCGTCAGATGGCTTCCTTACCATTAAGGGCAACCGTCTATTCCCCAAGTTGAGGTCATTTG	8:C>G	0.11	0.17	14	13	165	192	2	0.19	0.07
100006260|F|0--58:C>T	chr6R	566145645	TGCAGATACCTGGAAGATTATATTGCAGAACGAAGAGGTTAAAGCTCCTGTAAGTTTGCTTGCCCTGAC	58:C>T	0.43	0.37	68	13	92	173	2	0.49	0.08
100009254|F|0--39:C>T	chr2R	43926500	TGCAGATACTGACCAGATGCAGACATGTACATAGTCGGCCAATGCGTTTGGCCACACCGTCAAAACCGA	39:C>T	0.09	0.15	11	11	167	189	2	0.16	0.06
100021630|F|0--40:T>C			TGCAGATAGCGAAACTGAATTTTGCTTCGTGATTGAACCGTGGCCGCTAGCGCTAGCCGAGATCGGAAG	40:T>C	0.13	0.2	153	24	12	189	2	0.22	0.13
100046151|F|0--37:C>T	chr6R	754922316	TGCAGATAGGGGCTTGTGGGTTATGGATAGGGGCTTACAGACCACAAAGCTTTGCATTGCAAGAGAAAC	37:C>T	0.3	0.33	54	20	137	211	2	0.42	0.09
100002945|F|0--15:C>G	chr2R	772269139	TGCAGATAGTAAGTACTACTTGCACTGACTGCCCGCGCATCAGATTCAGTGCCGTAGAAGCCAAGAAGA	15:C>G	0.45	0.37	101	10	82	193	2	0.5	0.05
100019172|F|0--19:C>T	chr3R	626205966	TGCAGATATCAGACACCAACACAGCTAGCATTAGCGCCACCACCACCACCCATCACCACTGCCAGTACC	19:C>T	0.17	0.24	25	22	167	214	2	0.28	0.1
100043895|F|0--35:T>C	chr2R	3969023	TGCAGATATCATCTGTACGCACGATGTGTCGTGCATCAGCCGTAGATGAGATGAGATGAGAGTACATGT	35:T>C	0.12	0.19	171	25	12	208	2	0.21	0.12
100060117|F|0--50:G>A	chr6R	707091195	TGCAGATATGGCGAGCCCGACCTTCTCAGTTCCGACGACGACGGCCACAAGCAAGGAGACCGCTGCCAA	50:G>A	0.07	0.12	190	4	12	206	2	0.13	0.02
100107420|F|0--48:C>T	chr2R	611416077	TGCAGATATGGTAGAGATATGATTGATCGATCGGTTGGTTTCGTCGATCGATCAGGTGGGACACGCCGA	48:C>T	0.05	0.09	3	14	181	198	2	0.1	0.07
100058826|F|0--23:G>A	chr3R	112064996	TGCAGATATGTGTCCCGTTCCTGGAAACGCATATTCCAATATTTGGCTTGTAGGTTGAGATAGTATCTT	23:G>A	0.05	0.1	174	8	6	188	2	0.1	0.04
100025032|F|0--16:G>A	chr3R	922209862	TGCAGATATTCAACAAGAGGTGGAAGGAGGCGGTGGCGGAGGACATGTGCTGGACGGACCCCTACCCGC	16:G>A	0.08	0.13	196	3	15	214	2	0.14	0.01
100041068|F|0--7:C>A			TGCAGATCAAACGCGCGGATGATTCAGCGAGCGACCGAGATCGGAAGAGCGGTTCAGCAGGAATGCCGA	7:C>A	0.08	0.13	193	9	12	214	2	0.14	0.04
100003353|F|0--27:C>A			TGCAGATCAACGAGTATTTTATAGCATCCGTCCACTTTTTTTCATCAGCAATTGCACCGAGATCGGAAG	27:C>A	0.4	0.37	106	25	67	198	2	0.48	0.13
100005762|F|0--65:C>T	chr7R	340019718	TGCAGATCACTCCTAGGGATGAAGAATCGCCTGCCTTGCCTCATAACAAGCTGAAACGAGGATGACCCC	65:C>T	0.37	0.36	66	27	121	214	2	0.47	0.13
100050377|F|0--22:C>G	chr7R	98175058	TGCAGATCACTCGTGCGTGGCTCTTGCGGTGAAAAATCCACGACCCGTCTTTCGCGAGAATGAGTGGTA	22:C>G	0.22	0.28	37	7	142	186	2	0.34	0.04
100019848|F|0--42:G>C	chr4R	752563179	TGCAGATCAGCAAGGGAAGCAGCCAAGAAGGGGATGGAAGGGGAGGGCTGCTCGCTGCTGCACGGGGCT	42:G>C	0.08	0.13	161	5	11	177	2	0.14	0.03
100030123|F|0--32:T>C	chr3R	655586651	TGCAGATCAGCGCCGCTGACAGCCACCGTCACTGTCGGCCTCAAGCGCCCTCGACCTGGATTCCGCCGC	32:T>C	0.18	0.25	151	10	30	191	2	0.3	0.05
100003757|F|0--45:C>G	chr7R	99354809	TGCAGATCCCATCACTTCCTTCCTCTACCGCGCGCTCCACGTCAGCCAAGTACGTAGGTCCCTGTCAGG	45:C>G	0.15	0.22	23	8	154	185	2	0.25	0.04
100034321|F|0--14:A>G			TGCAGATCCTCCGCACCAAGAAGAACCCCGAGGCGGCGCCGAGATCGGAAGAGCGGTTCAGCAGGAATG	14:A>G	0.33	0.35	54	34	126	214	2	0.44	0.16
100028466|F|0--36:G>C	chr1R	316919975	TGCAGATCCTTCTTGATCTGAGCAGTAACTCATTGTGGGGTGCAATCCCCTCGAATCTTGGGATGCTGA	36:G>C	0.12	0.19	161	6	20	187	2	0.22	0.03
100062517|F|0--15:T>A	chr2R	888756624	TGCAGATCGAGCTTCTGTTCGATTCATTCAGATGTTTCAGGCTTCAATCCAAGCACGGAAGGAAGAGGT	15:T>A	0.31	0.34	134	21	54	209	2	0.43	0.1
100011882|F|0--58:C>G	chr3R	263753362	TGCAGATCGAGGTATCCCACAATTCCCTTCTGGCCGCGATTAATTCGTTCTGTCAGTACCCGCCAAGTG	58:C>G	0.12	0.19	15	20	171	206	2	0.21	0.1
100013162|F|0--57:G>C	chr5R	539111318	TGCAGATCGATTCCAACAATCAGCACGCTCACGGGATCACAGTAGACAGCAGTACTAGCACATTTCATT	57:G>C	0.3	0.33	136	18	52	206	2	0.42	0.09
100013162|F|0--6:T>C	chr5R	539111318	TGCAGATCGATTCCAACAATCAGCACGCTCACGGGATCACAGTAGACAGCAGTACTAGCACATTTCATT	6:T>C	0.09	0.15	161	10	12	183	2	0.17	0.05
100047938|F|0--53:T>A	chr2R	821512373	TGCAGATCGCAGGTCTCTCTCGCCCTCCATCTTGAATTCTTGATGCTGGAATTTTCCTGCGGTTGTAGG	53:T>A	0.05	0.1	177	9	6	192	2	0.1	0.05
100023751|F|0--13:T>A	chr2R	674404896	TGCAGATCGCCACTGCCCAATACGTACGGGCACTACCCAATGCGTACGGCAATCTTCATCGTCTCGAGC	13:T>A	0.13	0.2	168	8	22	198	2	0.23	0.04
100024291|F|0--59:G>A	chr6R	690826920	TGCAGATCGGGCCTCCTCCATACGCCTTTTTTGTTTGTCCTTCGTTGGCTATGTATTTCGTTTTCTTTT	59:G>A	0.35	0.35	61	11	116	188	2	0.46	0.06
100107335|F|0--51:C>G	chr5R	842188615	TGCAGATCGTAATTTACGTGTTGGCACGCCGAGTCAGTTCGTCGGAGCTGCCATGGGTTCCGCCGTGGC	51:C>G	0.35	0.35	54	23	108	185	2	0.46	0.12
100004387|F|0--19:T>C	chrUn	60982317	TGCAGATCTCCATTGGAAGTGTCGTTGTCATCTACCTCGACGACGCTCTTAGAAAGGGCTACGGCCTCC	19:T>C	0.19	0.26	165	16	33	214	2	0.31	0.07
100059158|F|0--61:G>C	chr6R	390340709	TGCAGATCTCGTGGAACTACAACTACGGGGCGGCAGGGCAGAGCCTCGGCTTCGACGGGCTGAAAGACC	61:G>C	0.25	0.31	152	15	47	214	2	0.38	0.07
100072114|F|0--67:C>T			TGCAGATCTGGAGCACCGTGCGTCGCCGTGCCATGGCCCGCGCAAGCGTGTGAGCCCGCACAAGCACCA	67:C>T	0.11	0.17	17	5	163	185	2	0.19	0.03
100090856|F|0--12:C>G			TGCAGATGACCTCCCACGCGCGCTCGAAGCCGCCGCGGTACCCGAGATCGGAAGAGCGGTTCAGCAGGA	12:C>G	0.17	0.24	26	20	168	214	2	0.28	0.09
100000474|F|0--32:A>G			TGCAGATGACTGAGAATGTGGTGTTGGTAATTAGGCCGAGATCGGAAGAGCGGTTCAGCAGGAATGCCG	32:A>G	0.22	0.28	30	31	149	210	2	0.34	0.15
100001450|F|0--62:A>C	chr2R	170175544	TGCAGATGAGACATGGATATACAGTAGTTATTAACGTGTTAAGATTTGGAAAGCTAGCAGCAATTCAAG	62:A>C	0.42	0.37	75	29	110	214	2	0.49	0.14
100040515|F|0--60:T>C	chr7R	77542192	TGCAGATGAGAGGGAGAACAATCCCAGCAGAGTGCCTGCGCTTGAGGCTTCGATACGTGCTTATGCTGA	60:T>C	0.1	0.16	172	3	17	192	2	0.17	0.02
100001572|F|0--24:C>G			TGCAGATGAGGAGCAGCAGCAGCACCACCACCACTACCGAGATCGGAAGAGCGGTTCAGCAGGAATGCC	24:C>G	0.25	0.31	44	20	148	212	2	0.38	0.09
100001417|F|0--43:G>A	chr2R	876341181	TGCAGATGATGCGAGCTTAGCTTACTTGGATGCTAGATTGCTGGGATGCATTAATGTGTACTGCCCACC	43:G>A	0.14	0.21	159	12	21	192	2	0.24	0.06
100004330|F|0--53:T>C	chr1R	370464326	TGCAGATGATTGCTGGGCAGAACCCGAACGTGATGCAAAGGTTTGTGCAGAATTTGCCCTCCCACCGAG	53:T>C	0.23	0.29	150	28	36	214	2	0.36	0.13
100027166|F|0--18:A>T	chr4R	629489050	TGCAGATGCAAAAGAAGCAGGCGGTGATGATAAGAAACTAGTTTTGGAACTTCAAGCTGCTCAAAGAGG	18:A>T	0.24	0.3	41	9	141	191	2	0.36	0.05
100051014|F|0--43:C>G	chr4R	813546694	TGCAGATGCAGGTATACCCCGGCCCGGTTTGGGAATCCAGGCACTCGCTGTGCTTGCTCACGCAGCTGT	43:C>G	0.08	0.13	11	6	164	181	2	0.14	0.03
100000638|F|0--23:A>T	chr2R	3968818	TGCAGATGCAGGTCTTATGCAAGACCTGTAGCAGCAGAGCAAATCTAGAAAATCAGCTGCATCCGAGAT	23:A>T	0.08	0.14	7	21	183	211	2	0.15	0.1
100035376|F|0--51:C>A	chr3R	673054155	TGCAGATGCCAACCCACCCAACCTGCTAGCTTCTTAACCGAAGCAAAGCAACGCAAAGCAGCTCGGAGA	51:C>A	0.19	0.26	168	12	34	214	2	0.3	0.06
100097108|F|0--40:T>C	chr7R	699816784	TGCAGATGCCTCGCGCCACGGTGGAGGAGAGGAGCCTGGATGGCGGCATCGAGGAGGAGAGCATCGCGC	40:T>C	0.08	0.14	187	18	9	214	2	0.15	0.08
100013610|F|0--54:T>A	chr1R	523141076	TGCAGATGCTGTGCCCACCAATAACTACTATCCTAGAGCAGACAGAATATAAATTCAGAAAGCTGCTTC	54:T>A	0.15	0.23	157	13	23	193	2	0.26	0.07
100034319|F|0--28:G>C			TGCAGATGCTTCCTTACATGCCGCTCGAGGCCGACGTGTTCCGAGATCGGAAGAGCGGTTCAGCAGGAA	28:G>C	0.39	0.36	110	19	67	196	2	0.48	0.1
100016918|F|0--22:T>A	chr1R	657101265	TGCAGATGGACTCACACGCGGCTCCCCTTTACACTTGTTTATTGCATGCAGCTTCTTCACCCCTTTTGG	22:T>A	0.15	0.22	149	1	25	175	2	0.25	0.01
100020399|F|0--10:G>C	chr2R	711558017	TGCAGATGGCGCTGCGGGCCAGCGCCGCCAACCTCAAGCAGGACCTGTACGCCATCATCCAGGCGAGGC	10:G>C	0.09	0.15	182	18	9	209	2	0.16	0.09
100020399|F|0--44:C>T	chr2R	711558017	TGCAGATGGCGCTGCGGGCCAGCGCCGCCAACCTCAAGCAGGACCTGTACGCCATCATCCAGGCGAGGC	44:C>T	0.05	0.1	5	12	190	207	2	0.1	0.06
100011046|F|0--10:C>A			TGCAGATGGGCTTCTCCTTCTTCACGGACGCCATCGCCGAGATCGGAAGAGCGGTTCAGCAGGAATGCC	10:C>A	0.11	0.18	187	6	21	214	2	0.2	0.03
100003255|F|0--50:C>T	chr2R	607730521	TGCAGATGGTACAGGATGTGGTCGAACATGATGTTCCTCTGGTCCATCTACTCCGTCTTCTACACCCCC	50:C>T	0.21	0.28	34	24	156	214	2	0.34	0.11
100032263|F|0--35:G>A	chr7R	625555026	TGCAGATGGTGCCGTGGGACGGCGGGAACAAGGACGACCTGCTCGGGGAAGAACGCTTCCAGATGCAAC	35:G>A	0.39	0.36	118	27	69	214	2	0.47	0.13
100001939|F|0--27:G>T			TGCAGATGTAAGTAAAGCTGCTAGCTTGCGAGAATCATTTACTGCCGAGATCGGAAGAGCGGTTCAGCA	27:G>T	0.22	0.28	33	28	153	214	2	0.34	0.13
100009376|F|0--28:G>A	chr7R	815020145	TGCAGATGTAATTAACTCTTTTTCATACGTGCACGTACGCGTGTGTGATGTGATGCTCATGCCACAAGC	28:G>A	0.33	0.34	128	7	61	196	2	0.44	0.04
100000863|F|0--18:T>A			TGCAGATGTATATAATCATTTTTGCTTTGCTATTGTGCTGTGGTACTGAATTTGATCCGAGATCGGAAG	18:T>A	0.24	0.3	149	27	38	214	2	0.37	0.13
100052193|F|0--42:A>G	chr4R	637078769	TGCAGATGTCCTCGTGGACGAACACCTCGAGGCAGATCGCGCACACCAGCTTCTCCGACGCCCTCCTGC	42:A>G	0.26	0.31	42	19	137	198	2	0.38	0.1
100036810|F|0--5:A>G	chr1R	584196020	TGCAGATGTGGTCGCCGAAGTAGGTGATGACGTAGAGGGAGAGGTCGTCGTCCGACTGCTGGACCTGCC	5:A>G	0.23	0.29	37	25	152	214	2	0.36	0.12
100005414|F|0--24:C>T			TGCAGATGTTGTACCTGTCAGCCGCCACGAGCAGATGGCCGAGATCGGAAGAGCGGTTCAGCAGGAATG	24:C>T	0.12	0.18	16	14	168	198	2	0.21	0.07
100052765|F|0--32:C>T	chr7R	875169635	TGCAGATTAACAAGGATTACAAGTATTTTACCCTCGCTGTTGGATCTTGGGGTATATAACAAGCTCTGC	32:C>T	0.06	0.1	6	11	188	205	2	0.11	0.05
100037323|F|0--51:T>G			TGCAGATTACAGGCATTTATCAAAAGTAATGGGTCCATACCTTGCTCGGGATAGGTGGAGCCGAGATCG	51:T>G	0.08	0.13	13	7	194	214	2	0.14	0.03
100014022|F|0--10:C>G			TGCAGATTACCTGCGTCGTCACGCTCTACATTTGGTGCGCCGCCACGAACCCCGAGATCGGAAGAGCGG	10:C>G	0.19	0.26	27	26	161	214	2	0.3	0.12
100003915|F|0--52:C>T			TGCAGATTATAGGAACATTTTAATTTACAGATCACATGAACATTTCAATTTTCCTACCGAGATCGGAAG	52:C>T	0.25	0.3	40	8	129	177	2	0.37	0.05
100013213|F|0--38:G>C	chr3R	622646351	TGCAGATTCACAAACGCAGCAGATTTACCCCCATTCTCGGATCAGAACAATCCGCTTTGGCAACGAGCA	38:G>C	0.42	0.37	78	22	114	214	2	0.49	0.1
100053970|F|0--26:G>T			TGCAGATTCACGGTATGGTCGGATCTGGGTGTTTCTTGGAGTTGTTGGTTGCTCGCCGTCGCCGAGATC	26:G>T	0.24	0.3	43	7	147	197	2	0.36	0.04
100030819|F|0--46:C>G	chr2R	828794357	TGCAGATTCCGTCGGCACCGCGTCATCGCCACCGCCAGAACCCCGCCGTGACCCCTCCCCTGAATTCTC	46:C>G	0.46	0.37	104	14	87	205	2	0.5	0.07
100065630|F|0--27:C>A			TGCAGATTCGCGCTGGGGCGCTTTGTCCCTTGTTTCGGCCTGTCTAAGGCGTGGACCGAGATCGGAAGA	27:C>A	0.21	0.28	16	49	127	192	2	0.33	0.26
100003814|F|0--32:G>T			TGCAGATTCTTTGAGCAGAATGAACATGACGGGTGGCTTGGGATTACAAGCCCACCGAGATCGGAAGAG	32:G>T	0.11	0.18	14	21	179	214	2	0.2	0.1
100019888|F|0--15:G>C			TGCAGATTGAGCACAGGTTACATCAGCCGATCCGCCGAGATCGGAAGAGCGGTTCAGCAGGAATGCCGA	15:G>C	0.25	0.3	47	13	154	214	2	0.38	0.06
100011942|F|0--18:T>C			TGCAGATTGATCTTGGGATAGGTTTGAAGAAAGCAACAAAGAAGAAGAAAGAAGAGGAAGAAGCAGAAC	18:T>C	0.42	0.37	94	20	65	179	2	0.49	0.11
100011340|F|0--24:G>A			TGCAGATTGTGAACTTTGGGCCAAGCGCCGTGAACCTCACATTATCTGCAACCGAGATCGGAAGAGCGG	24:G>A	0.4	0.36	106	25	65	196	2	0.48	0.13
100031993|F|0--52:C>A	chr7R	116140613	TGCAGATTGTGCCGTCACCAATGACACAATTTCAGTGGTAGGTATGTCGATCCAGCATAGAACAATATA	52:C>A	0.32	0.34	52	20	121	193	2	0.44	0.1
100012059|F|0--30:C>T	chr4R	847360442	TGCAGATTTATAGCTGGGCAGGTGCACACACAAAACTGGCCAACCTTCTAGTCTGGCGCGCCTGATCCG	30:C>T	0.2	0.27	36	6	156	198	2	0.32	0.03
100022465|F|0--36:C>T	chr5R	68860980	TGCAGATTTATTTTCTCTGAACTAAGATTCTTGCATCATGGAGTATTTCATAGACATTTCTATCTTGAC	36:C>T	0.15	0.22	24	6	150	180	2	0.26	0.03
100008133|F|0--22:T>C	chr5R	458671915	TGCAGATTTGAGGAAAGAGACGTCCGTCCTACTCTCCTCTCCGCTCTTTAAAGCTCCCCGCAGCCGAGA	22:T>C	0.25	0.3	150	22	42	214	2	0.37	0.1
100025108|F|0--42:A>T	chr1R	544361331	TGCAGATTTGGGCCTTGAATGTAGTACTGAAGACTGTTACAAAATGGCGAAGAGTTACTCAATTTTTTA	42:A>T	0.27	0.31	45	14	136	195	2	0.39	0.07
100069185|F|0--61:G>A	chr1R	391533003	TGCAGATTTGTGGCGATCCTGATAATGCGGGGAAGTGGGAGTGCTGCACCCACGTGATACTGCTGCTAA	61:G>A	0.43	0.37	107	11	80	198	2	0.49	0.06
100003369|F|0--14:T>C	chr1R	626879006	TGCAGCAAACTTGATGTGGTACTCAACGAGCGATGTGCGTACGTGCAGGTTAATGAGGCAACTGTCTGC	14:T>C	0.33	0.34	126	15	57	198	2	0.44	0.08
100031322|F|0--64:T>G	chr4R	520724825	TGCAGCAAAGACGACAAGCACGCGTTAGTCATTGGCGATGCAAACAGTTTCTACGGCGACGTGCTTGCG	64:T>G	0.22	0.28	150	11	38	199	2	0.34	0.06
100003602|F|0--21:T>G			TGCAGCAAAGCATGCGCTCTGTGACGAGGGCCACACGCCGAGATCGGAAGAGCGGTTCAGCAGGAATGC	21:T>G	0.26	0.31	150	18	46	214	2	0.38	0.08
100052904|F|0--12:T>C	chrUn	59900798	TGCAGCAAAGTCTATGCAGTTGTTATTTGATATACTCTACCAGCCAGTAGAAAGGCTCGTACGTGTTCC	12:T>C	0.46	0.37	91	6	77	174	2	0.5	0.03
100035276|F|0--55:T>C	chr7R	234071016	TGCAGCAAAGTGTCCATGGATTGCAAATTTTGTCTTTGCCCCATATGCGATCATGTGCTACGGCCACGC	55:T>C	0.44	0.37	100	15	78	193	2	0.49	0.08
100054701|F|0--38:G>A			TGCAGCAAATCTGGTGGTTCGAGGTGGTCGGGGAGATCGACTTCCGCTTCCCGAGATCGGAAGAGCGGT	38:G>A	0.18	0.26	164	21	29	214	2	0.3	0.1
100011832|F|0--23:G>A			TGCAGCAACAGGTACCAGCAAAGGCCCCTCTTCAGTGCCGAGATCGGAAGAGCGGTTCAGCAGGAATGC	23:G>A	0.41	0.37	97	8	67	172	2	0.48	0.05
100006331|F|0--5:C>T	chr2R	749073800	TGCAGCAACATAAACACAATCTGAGGTTTCGGGAGGAAAAAGCTCATGTTTGAAATGCCTGTGAAAATT	5:C>T	0.14	0.22	23	15	174	212	2	0.25	0.07
100022145|F|0--22:G>A			TGCAGCAACCGAAAATCTCAGCGCCCCACGGATTTTTTATAATCCGAGATCGGAAGAGCGGTTCAGCAG	22:G>A	0.05	0.1	196	13	5	214	2	0.1	0.06
100024364|F|0--22:T>C	chr7R	597776336	TGCAGCAACGAAAATGAAGAAATACAAGCCGTAAATCCGCAGCTTGGGACAAGATTTGGGACGGCAGGA	22:T>C	0.12	0.19	164	10	18	192	2	0.21	0.05
100039129|F|0--28:G>T	chr6R	770879945	TGCAGCAACGACTTAGCGTGAGTATATCGTTTACCTCGTCGGTCGCACAATCTCCACTCCACCACCGCC	28:G>T	0.24	0.3	133	3	40	176	2	0.36	0.02
100014449|F|0--17:T>C	chr3R	163084472	TGCAGCAACTTTTCAAGTTTCGATCCACTAATTTCGCTCTAAAGTACGAAAACTCGGCCCACTCTTGGT	17:T>C	0.19	0.26	161	20	31	212	2	0.31	0.09
100048513|F|0--18:C>A			TGCAGCAAGACCTCGGCGCCGATGTGATCGGCCTCGCTACGCCGCCGAGATCGGAAGAGCGGTTCAGCA	18:C>A	0.24	0.3	150	18	42	210	2	0.37	0.09
100047847|F|0--40:G>A			TGCAGCAAGACGAGGTACTCCCCCACTGCCTGCTCGAATCGATTGCTTCGTCGCCCTACGCCTCGGATG	40:G>A	0.12	0.18	177	12	18	207	2	0.2	0.06
100123996|F|0--32:A>G	chr3R	29724508	TGCAGCAAGCAAGGGAGAAAATGAGCAAAGGCACAAGGATGGTAGCGAAGCTGACGGCTTACCCGCGTG	32:A>G	0.07	0.12	6	16	177	199	2	0.13	0.08
100003270|F|0--36:C>G			TGCAGCAAGCAATCATGCCGAAAATATCAGTCCGAACTTGCCCGAGATCGGAAGAGCGGTTCAGCAGGA	36:C>G	0.47	0.37	100	28	86	214	2	0.5	0.13
100079397|F|0--7:A>G	chr2R	818411832	TGCAGCAAGGACACTCATGAGCTGAACCGTAAGAAAAGAGAGTGCGTACGTTGGAGTACTTGAGAGGGC	7:A>G	0.17	0.25	30	5	153	188	2	0.29	0.03
100093487|F|0--57:G>A	chr3R	738555761	TGCAGCAAGGAGCGGTGCAAATTTAGCGCAAGTGAAGCATCGGCACACTCATATTTGGTGGTTTTGCGC	57:G>A	0.42	0.37	110	13	79	202	2	0.49	0.06
100000476|F|0--28:G>C	chr3R	251493076	TGCAGCAAGTCAGGAGCCATCATCTCCTGGAACTGGAAGACGTCCTCCTCCAGGAAGCTCAGGAATCCC	28:G>C	0.13	0.2	173	24	16	213	2	0.23	0.11
100002525|F|0--20:C>A			TGCAGCAAGTGCCGCACGCCCATCCGAGGCAAGAACCCGAGATCGGAAGAGCGGTTCAGCAGGAATGCC	20:C>A	0.15	0.22	160	16	22	198	2	0.26	0.08
100002147|F|0--9:T>C	chr4R	129061054	TGCAGCAAGTGCGCTATCAACCCAGTCTATTTTCTGTGAGTTCCATTATGTGCAGTGCAGTTGCTTGCT	9:T>C	0.06	0.11	190	21	3	214	2	0.12	0.1
100013047|F|0--22:G>C	chr4R	111875416	TGCAGCAAGTTAGGTGTCAAAGGTTAGTTTATTCACCACAATATATTCTTCTGTGTGGGAACCCCAATT	22:G>C	0.32	0.34	129	11	57	197	2	0.43	0.06
100019826|F|0--52:C>T	chr6R	782828897	TGCAGCAAGTTATGCCATGGCTATGATATCTGACTCTGAGTTGGGTCAAAAGCACATTTAGAGCCTGTT	52:C>T	0.31	0.34	115	12	48	175	2	0.43	0.07
100054208|F|0--34:T>G	chr6R	613226619	TGCAGCAATCACGCGCGTGCCGAAGAACGTCGTCTTCCATCCCTCACTTCAATGGCCTGAGGATCCTGC	34:T>G	0.45	0.37	100	14	80	194	2	0.49	0.07
100027670|F|0--30:T>G	chr6R	630856075	TGCAGCAATCATGAGACCAAACCGTCCATGTATGCTGTCGACCTCACCTCAATTGGGGACGTACACTGA	30:T>G	0.49	0.37	92	13	98	203	2	0.5	0.06
100077930|F|0--27:C>A	chr5R	568980723	TGCAGCAATCCAAGCCGAGTTTGCATCCGTGCCTTCTCGCCGATCGCCCGATCCGTGCCTTCTCGCCGA	27:C>A	0.08	0.14	155	7	11	173	2	0.15	0.04
100015670|F|0--22:G>C			TGCAGCAATGGAAAAATCGCAAGGATGAAGATACAGCAGCAGCCGAGATCGGAAGAGCGGTTCAGCAGG	22:G>C	0.38	0.36	78	69	33	180	2	0.47	0.38
100009420|F|0--17:T>C	chr3R	661051207	TGCAGCAATGGCACGAATAACAACAAACGGGCAACGCTCGAACAGTCAGAAGTATGAAGTGCGAGAACC	17:T>C	0.42	0.37	114	19	81	214	2	0.49	0.09
100000914|F|0--33:G>A			TGCAGCAATGTGTGGGGTATCATCTAGTTCCTGGAAAAATAGTGCACAGATATAACCGAGATCGGAAGA	33:G>A	0.1	0.17	169	17	12	198	2	0.19	0.09
100005244|F|0--62:C>T			TGCAGCAATTCGGCACGATTCACCATGGGTAAGTCAAATCTACAAACAAACCAGGAAGGCCCCGAAGCT	62:C>T	0.4	0.37	72	7	108	187	2	0.48	0.04
100006484|F|0--19:C>G	chr5R	474639072	TGCAGCAATTTGTTGGCGTCCATGCATCCACCGCGGCGAAGGCCCGCGCAAACATCTCAACTCCCATCT	19:C>G	0.26	0.31	47	10	142	199	2	0.39	0.05
100005595|F|0--7:C>G			TGCAGCACAAAGAAACGAGGGAATTTGACAACACGACGAACAATCCGAGATCGGAAGAGCGGTTCAGCA	7:C>G	0.08	0.14	5	21	168	194	2	0.15	0.11
100025401|F|0--13:G>A	chr3R	26321723	TGCAGCACAAATCGACATTGGCGAGCGATGGATCAACACGTACGCTGCGAACCGGGAACAAACTAAAGG	13:G>A	0.2	0.27	153	10	34	197	2	0.32	0.05
100076993|F|0--64:G>T	chr7R	843307512	TGCAGCACAACCTCCCTCGTCGCCGCCGCATCGCAGCAGGCGCCCAGGGCCTGCACCGCCGCGCGGCCA	64:G>T	0.41	0.37	67	22	99	188	2	0.49	0.12
100048612|F|0--60:A>C	chr3R	645595744	TGCAGCACAAGAAGCGCGTGCGCGACATGGACCTTGCGGGCGGTCGCCCTAGCCCTGGCCATAGCGCTG	60:A>C	0.34	0.35	123	16	59	198	2	0.45	0.08
100038204|F|0--28:T>C	chr3R	242108953	TGCAGCACAAGATCATGCAGCTGCGCAGTCGTGAGCTTCCGAAGGCTGAGCGGCAGCCCCAAGTACCTG	28:T>C	0.49	0.37	86	20	90	196	2	0.5	0.1
100002720|F|0--39:G>T	chr4R	784820369	TGCAGCACAAGCTAGAGCTGATTGTGGTGCACAAACATAGCTTTTCAGGAAATCACATGTTGCTGGCAT	39:G>T	0.34	0.35	59	5	115	179	2	0.45	0.03
100044899|F|0--9:A>G			TGCAGCACAATAGCTACTATGCAAGCTAGCGCGTCGCGCCGCGCGCGTTGGCCGAGATCGGAAGAGCGG	9:A>G	0.38	0.36	61	41	110	212	2	0.47	0.19
100014996|F|0--44:G>C	chr2R	794007642	TGCAGCACACACAAATTATTAGGCGATTTCAATAAAATTCAAATGGAAATTTTGGTACTTTGACCTAAA	44:G>C	0.47	0.37	106	13	94	213	2	0.5	0.06
100015248|F|0--40:T>G	chr2R	669408625	TGCAGCACAGCAACAGCTTGATGAAATCAGCAAGAAGCCATAGGAAGTTTGAGAAGATGATCCATTCTG	40:T>G	0.17	0.25	152	7	29	188	2	0.29	0.04
100032921|F|0--11:G>A	chr5R	845361967	TGCAGCACAGCGCGCTCGACCTCTGCCTAGGCGTGGCGCTCGGCCGCCTCCCCTTGGCCAAAGAGGCCA	11:G>A	0.18	0.25	165	12	31	208	2	0.29	0.06
100052185|F|0--26:A>G	chr3R	925975304	TGCAGCACAGGAATCGGGGGAGAAAGAGGAAAGGGAAAGGAGGGATCGATCAAAAGGAGAGAAAGGCCC	26:A>G	0.36	0.35	63	20	122	205	2	0.46	0.1
100034915|F|0--56:C>G	chr4R	505524964	TGCAGCACATCGAGCCCTCCCGCTTCATCTCCTTCTCCTTCCCCAACCCTCTCCTCCACGACGCCTCCA	56:C>G	0.43	0.37	80	25	109	214	2	0.49	0.12
100039309|F|0--11:G>A	chr5R	570706641	TGCAGCACATCGGTTTTATGATTAGTACAGACAGCGACGAATGGAACGAACAGATTCAAGCACAAGCAC	11:G>A	0.49	0.37	98	24	92	214	2	0.5	0.11
100025899|F|0--38:A>T			TGCAGCACATTGATGGGGCTGATTGTGCTCTCCCTCCCACCCCCAGCCTCCGAGATCGGAAGAGCGGTT	38:A>T	0.25	0.3	45	14	152	211	2	0.37	0.07
100034818|F|0--21:A>G	chr7R	818541850	TGCAGCACCAACCAGCGCGGCACAGTTCTTGGTCTTGCGGCAAAGGATGGACACGACACGGTCTATCTC	21:A>G	0.5	0.37	94	25	95	214	2	0.5	0.12
100022980|F|0--62:T>G	chr7R	199784293	TGCAGCACCAATGCGCTCTCAAAGAAAAATTTGAGGAAGGCGAGCTCGCCGCGGCCCCCTTGTAAATCA	62:T>G	0.5	0.38	97	20	97	214	2	0.5	0.09
100048315|F|0--10:G>A	chr2R	834192404	TGCAGCACCAGCGGAGACTCCTTGCTGACGGTGAGCACGCACCGTATCGTGAAGCAGCCGTCGCCTTGG	10:G>A	0.41	0.37	118	18	78	214	2	0.48	0.08
100074508|F|0--25:T>A	chr5R	39242065	TGCAGCACCGAGGACAAGACATGCCTTTACAGGGTACCGTACATGGACTGGTCGGCGAGCGAAGGTAGC	25:T>A	0.19	0.26	171	3	40	214	2	0.31	0.01
100071137|F|0--16:A>G			TGCAGCACCGCGGGGAAGAGGGCGCCGGGATCGTCGCCGCCGAGATCGGAAGAGCGGTTCAGCAGGAAT	16:A>G	0.48	0.37	97	5	91	193	2	0.5	0.03
100072426|F|0--13:G>T			TGCAGCACCGCGGGGAGGAGGGCGCCGGCATCTGCGCCGCCGAGATCGGAAGAGCGGTTCAGCAGGAAT	13:G>T	0.23	0.29	39	6	141	186	2	0.35	0.03
100012404|F|0--30:A>G			TGCAGCACCGCTCTTGGAGCTGTCTATACTACGGCGCCGAGATCGGAAGAGCGGTTCAGCAGGAATGCC	30:A>G	0.21	0.27	27	28	143	198	2	0.33	0.14
100016599|F|0--17:G>C			TGCAGCACCTCACCTCAGTGGATCCCGTGGCAATCGGGCTCAACGGCGAAGGATCTGACCGAGATCGGA	17:G>C	0.06	0.11	157	15	3	175	2	0.11	0.09
100083222|F|0--67:T>G	chr5R	440480408	TGCAGCACCTCGACCTCTCCCAGAACGACCTGGTGGGCCCTCTGCCCGCCTGCCTCGCCGCCCTCCCTG	67:T>G	0.1	0.16	157	2	16	175	2	0.18	0.01
100006783|F|0--64:C>T	chr2R	41675480	TGCAGCACCTCGCCAAGCTGAAGAAGCTCTGGAAGCTCAGCGTCAACGTCACCACCGACGCCAACGTCG	64:C>T	0.07	0.12	7	15	192	214	2	0.13	0.07
100076131|F|0--7:C>G	chr4R	516513078	TGCAGCACCTGCTCCGCCCACGGCCACGACCAGCTCAGCGTGGACACGATGCAGCTCATCTTCTGGTCG	7:C>G	0.23	0.29	147	10	41	198	2	0.36	0.05
100083954|F|0--58:T>C	chr7R	19393875	TGCAGCACGACGAGGCTGGGGTCTTGGGCTTCTTGTCCTTCTTGTGCGCATCCCACCTTTCGACGGAGT	58:T>C	0.2	0.27	126	79	3	208	2	0.33	0.38
100034111|F|0--50:C>G	chr2R	941181131	TGCAGCACGGAGATGGGGTTGGTGTAGTGCATCTTGGGCAGCAGCGGCCGCCCGTACTGCCCCAGCATG	50:C>G	0.48	0.37	92	20	100	212	2	0.5	0.09
100096879|F|0--11:T>C			TGCAGCACGGGTCACTGCGCCCGCCACCGTTAAGACTCGGCTCTGCAAGAACCACGGCGCGCCGAGATC	11:T>C	0.26	0.31	39	30	140	209	2	0.38	0.14
100019566|F|0--20:G>T	chr7R	144149244	TGCAGCACGGTCGTCTCCTTGGGCAGCACCGTCGGCCCCACCATCACCTTGGGCCCCAGGAGCACGTCC	20:G>T	0.08	0.14	9	18	187	214	2	0.15	0.08
100027904|F|0--51:A>C	chr1R	571619551	TGCAGCACGTCCGAGAAGCTGAGCTTGTCCAAGGACACCTGGCCGTGCGGCACACCCTGAGGCAGCGGC	51:A>C	0.06	0.11	8	7	168	183	2	0.12	0.04
100063416|F|0--41:C>G	chr6R	712995570	TGCAGCACGTCGCCCAGCTTGACGAGAGGGACTGTGGCCTGCTGGCCTGCTGCGACGGCCTCCTCCTCG	41:C>G	0.08	0.14	10	15	184	209	2	0.15	0.07
100089275|F|0--8:G>A	chr5R	725005449	TGCAGCACGTGGCCGCTCTCCTCGCCGCTGGTGGCGCTGCTGAGCGCCGCGGCCGCCTCAACGTCCCGC	8:G>A	0.15	0.22	167	21	20	208	2	0.25	0.1
100016748|F|0--33:G>A	chr3R	906967329	TGCAGCACTCCCAGCTTAGGCAGCTCGCAGCTAGAATGACGCTATGCTTCGAATTAGCACTGCATACCT	33:G>A	0.38	0.36	129	6	77	212	2	0.47	0.03
100069970|F|0--8:T>G	chr4R	708949640	TGCAGCACTCGCTTTGTGTTGGGTCTAACCGTAGGCAGCTCTCTGCTCTCTCTCCTCCGATGGAAGGTA	8:T>G	0.13	0.2	2	47	149	198	2	0.22	0.24
100062675|F|0--32:A>C	chr7R	791380914	TGCAGCACTGCCACGAGCGTAACATCCTGCACAGGGACATCAAGGGCTCGAACCTGCTGATCGACCGCG	32:A>C	0.16	0.24	147	5	27	179	2	0.28	0.03
100012696|F|0--49:A>T			TGCAGCACTGGATGGATACAGCCGCGCACGCAGCCAAGACCGATCAAGCAGACCGACCGAGATCGGAAG	49:A>T	0.06	0.11	1	24	189	214	2	0.11	0.11
100026923|F|0--28:C>A			TGCAGCACTGGCGTGTTTACCTCAGTTCCGCTACTGCCAATGCCCCGAGATCGGAAGAGCGGTTCAGCA	28:C>A	0.1	0.16	171	13	13	197	2	0.18	0.07
100002126|F|0--13:G>C			TGCAGCACTGTCAGTTTCGGTTCTGGTCTCCTGCTTAGTTCCGAGATCGGAAGAGCGGTTCAGCAGGAA	13:G>C	0.37	0.36	106	10	61	177	2	0.47	0.06
100024581|F|0--32:A>G	chr6R	761671052	TGCAGCACTTGGATTTGAGATCCTAGGATGGGAAAGTTGACTTGGGACAGAGGAGAGATGTGCAGGGGC	32:A>G	0.48	0.37	93	13	87	193	2	0.5	0.07
100014462|F|0--22:A>G	chr1R	634404554	TGCAGCACTTGTGGACCGGTCCAATCTCAAATGCAGCTGTCGATGTTGTTCAAGGGAGCCGAGATCGGA	22:A>G	0.34	0.35	56	16	118	190	2	0.45	0.08
100017967|F|0--63:C>T	chr2R	222896408	TGCAGCAGAAAAACAAAAGGCCCATTCAGTCTTATCAGCAAATTAAATACTCCTACTCGCATACATAAA	63:C>T	0.05	0.1	7	6	172	185	2	0.1	0.03
100001360|F|0--28:G>A	chr7R	830825072	TGCAGCAGAAACCTGAAGTTGTCTGGAAGAAGCAGGGCACTGTGTGTCTGATTGCCAGTTCTTCTGCCT	28:G>A	0.05	0.09	188	13	4	205	2	0.1	0.06
100030380|F|0--14:C>T	chr2R	176224086	TGCAGCAGAAATCGCTTTGGATTTGCACGTAGAGCGCCCCGCGCAGGTACACGCCGTAGCGCTTCTGGT	14:C>T	0.26	0.31	118	72	18	208	2	0.38	0.35
100005651|F|0--18:A>G			TGCAGCAGAAATCGTATAAATTAAAGAAGAAACAACAGCACTTGCTTTGGACAGTAATCGACCGAGATC	18:A>G	0.09	0.15	12	12	183	207	2	0.16	0.06
100006421|F|0--5:C>A	chr4R	902849040	TGCAGCAGAACTCTCAAAGAGGAAGTAAACGACAGCAACGTACCCGTCCAGCCTCTCCATTATCCCGTG	5:C>A	0.09	0.15	192	6	16	214	2	0.16	0.03
100001885|F|0--31:A>G			TGCAGCAGAAGCCAAATCAAGCTAGAGACGAAAAGAAGTGAAAAATAACACCAACGGCCTTGCATTCCT	31:A>G	0.11	0.18	16	8	158	182	2	0.2	0.04
100068408|F|0--20:A>C	chr5R	541375658	TGCAGCAGAAGGACGTGCTGAGGGCCTTCATCGAATCGAGGGCCCAGAAGCGCGCGAGCGGGCCTGCTG	20:A>C	0.41	0.37	72	28	112	212	2	0.48	0.13
100007968|F|0--24:G>A			TGCAGCAGAGAAAAAACGCACGCAGAAATCAGCGAAGAAGATCCGAGATCGGAAGAGCGGTTCAGCAGG	24:G>A	0.44	0.37	102	35	77	214	2	0.49	0.16
100058351|F|0--12:C>G			TGCAGCAGAGGGCGTGCTGGAAGAGGCCTCCTTGCCACCACGAGCATCCGAGATCGGAAGAGCGGTTCA	12:C>G	0.15	0.22	24	12	161	197	2	0.26	0.06
100070821|F|0--61:G>C	chr4R	737087843	TGCAGCAGATCGAGAAGGATTTCGGCTCCTTTTTTAATTTCAGGGAGGAGTTCATGCGCTCGGCGCTGT	61:G>C	0.24	0.3	141	10	42	193	2	0.37	0.05
100066236|F|0--8:A>G	chr1R	16632857	TGCAGCAGATCGTTTGGCACGACGATGATGGCCTCCACCGTCGCCGTGTTGCCCTGGTCCGCCCCCCAT	8:A>G	0.09	0.14	12	6	157	175	2	0.16	0.03
100018589|F|0--64:C>T	chr1R	385333907	TGCAGCAGATTCTTCTTACCAAGCCGAGCGAGCTGTTTCGTGTAAAATCAAATCTTCGCGTCCGCCTGT	64:C>T	0.46	0.37	86	23	105	214	2	0.5	0.11
100020001|F|0--28:C>A			TGCAGCAGATTGCTGCTATTTCGCACAGCCTAGCGACCGACGAAATAAATTGGGCCGAGATCGGAAGAG	28:C>A	0.4	0.36	111	7	72	190	2	0.48	0.04
100007057|F|0--36:T>C	chr2R	733050620	TGCAGCAGCACCCCGATCTCCGCCAGCGACAGCACGTCCTCCAGTATCACCTTGGCGAATATCCGAGAT	36:T>C	0.47	0.37	94	23	81	198	2	0.5	0.12
100083937|F|0--25:C>G	chr4R	36986192	TGCAGCAGCACCTGCGCAGGATCACCGTGCCGCTGCTCGTGCTGCACGGCGCCGACGACATGGTGACCG	25:C>G	0.12	0.19	4	44	166	214	2	0.21	0.21
100003597|F|0--24:A>G			TGCAGCAGCACGAGCAAACCATCCAACCAACTAATACTTCAGCACCGAGATCGGAAGAGCGGTTCAGCA	24:A>G	0.18	0.25	27	17	153	197	2	0.3	0.09
100083205|F|0--57:A>T	chr6R	701276682	TGCAGCAGCACGGGGGCGCCGTCGTGAAGCGGAAGCGCACCAAGAGGCCGCGCCACCAGACGCCGCCGA	57:A>T	0.34	0.35	60	17	123	200	2	0.45	0.08
100067192|F|0--46:A>T	chr3R	184706731	TGCAGCAGCAGCACCAGAACACGGAGCATTAGCGAAGCAAGCGGCAAGAGCAGCAGATCGGCCCGCAGC	46:A>T	0.26	0.31	151	15	47	213	2	0.38	0.07
100020110|F|0--62:G>A	chr2R	818353692	TGCAGCAGCAGCAGCCTGTATCGGTGACGAACCCTCAACATGTATAGGTTAGAGACGGACGGGCCGAAG	62:G>A	0.27	0.32	145	22	47	214	2	0.4	0.1
100033221|F|0--14:G>A	chr4R	704714683	TGCAGCAGCAGCCCGAGAGAGAAATAATGGTGTATGAGGCAGTGGAGGCCATTGCTCTCAGGAGCCAGG	14:G>A	0.35	0.35	116	11	59	186	2	0.45	0.06
100083935|F|0--21:C>T	chr5R	42257358	TGCAGCAGCAGGATCAAATCCCGTATGGCTCCAGTTCCATATTTTACATCTAGGGCCGTGTCTGGAGTG	21:C>T	0.17	0.24	25	15	152	192	2	0.28	0.08
100020962|F|0--16:G>A	chr7R	582807316	TGCAGCAGCAGTTCGCGATGTCAAGACACCGATTTGTATCGGCGCAGTTCTCATCAAAGCCACACAAGA	16:G>A	0.36	0.36	66	10	119	195	2	0.46	0.05
100005534|F|0--56:G>A	chr7R	338457562	TGCAGCAGCATGGCCACAGAGTATGCCGTCATCCTCTCAGCCATGGCGATGCCCGCGCAGATCCTCCTC	56:G>A	0.35	0.35	126	15	63	204	2	0.45	0.07
100079939|F|0--61:C>G	chr5R	687225306	TGCAGCAGCCGTAGTGGAGGAAGACGCCGAGCGGCGGCAGGATGATGGCGAGCAGGATCTCCAGGAAGG	61:C>G	0.21	0.28	35	12	146	193	2	0.33	0.06
100081766|F|0--23:A>G	chr6R	101724601	TGCAGCAGCCGTGCAACAGCGGCAGATCCTTGCTTCTTCCCGAAGCGAGGAACGACTAGCGGCTCTCCT	23:A>G	0.16	0.24	153	13	25	191	2	0.28	0.07
100007056|F|0--16:A>G			TGCAGCAGCCGTGCGTATCCCCTTCGGGCCTCAGCTCCGAGATCGGAAGAGCGGTTCAGCAGGAATGCC	16:A>G	0.34	0.35	57	22	121	200	2	0.45	0.11
100036977|F|0--32:C>G			TGCAGCAGCGAGAGGCCGCAGATCAGCAGGAGCACCGAGATCGGAAGAGCGGTTCAGCAGGAATGCCGA	32:C>G	0.41	0.37	69	12	103	184	2	0.48	0.07
100018928|F|0--14:T>C			TGCAGCAGCGCCAGTGACGCTGCTAGCGACTAAACGCGCGCTTTATCTCGATCGCCGAGATCGGAAGAG	14:T>C	0.37	0.36	103	28	54	185	2	0.46	0.15
100004881|F|0--28:C>A			TGCAGCAGCGCCTGCAAGGTAATCCTTTCTAGCAGTTCCTCCACCGAGATCGGAAGAGCGGTTCAGCAG	28:C>A	0.4	0.36	119	19	76	214	2	0.48	0.09
100060596|F|0--43:A>C	chr1R	594236237	TGCAGCAGCGCCTGTTTTGTTTCACACAACCCATGTTTGTTCCATACATCCCAAGCCCCGCAGGTAACG	43:A>C	0.12	0.19	16	13	151	180	2	0.22	0.07
100040119|F|0--20:A>G			TGCAGCAGCGCGAGGAGCGCATCGTGATCGCCCTCGCCGAGATCGGAAGAGCGGTTCAGCAGGAATGCC	20:A>G	0.11	0.18	14	18	175	207	2	0.2	0.09
100027828|F|0--46:A>G	chr1R	405121399	TGCAGCAGCGCTGAAGACCCCACCCCATGGGGGCAAGTGATAACTCATGGACGGATAGCGACTGCTCGA	46:A>G	0.38	0.36	68	17	116	201	2	0.47	0.08
100062283|F|0--66:G>C	chr1R	96112272	TGCAGCAGCGGCAGCCGCCGCAGCTTCCTCCGCCACCAGCCGATCATGCACCTTCTTGATATACTCGGC	66:G>C	0.11	0.17	181	7	19	207	2	0.19	0.03
100001076|F|0--8:C>G	chr1R	521020906	TGCAGCAGCGTGTGGTACTTGATGGTCCACCAGAGCGCCATGTCCGTGATGAGGAACTGCACCTCGCCG	8:C>G	0.12	0.19	18	17	179	214	2	0.22	0.08
100017310|F|0--50:C>A			TGCAGCAGCTCCCCGTGGACTACGCCCAGAAGGGCGTCCTCCTGCCCAAGCCTCCGAGATCGGAAGAGC	50:C>A	0.44	0.37	72	71	49	192	2	0.49	0.37
100042470|F|0--38:C>A	chr4R	147475442	TGCAGCAGCTCCTTCCCGGGGATCACCACCTGCGTCAGCACGAACCGCCCATCCGCGCGGAACGTCCGA	38:C>A	0.05	0.09	196	12	5	213	2	0.1	0.06
100078384|F|0--34:T>C			TGCAGCAGCTCGATCTTGCCGGCGTCCTCGCCTTTGCCGCGCCTCCGAGATCGGAAGAGCGGTTCAGCA	34:T>C	0.46	0.37	76	12	92	180	2	0.5	0.07
100012345|F|0--31:C>T			TGCAGCAGCTCTCCGACGAGCTCCGCTCCGACGTCATCTTCCACGTCTCCAAGACCGAGATCGGAAGAG	31:C>T	0.26	0.31	41	27	145	213	2	0.38	0.13
100043739|F|0--19:T>C			TGCAGCAGCTCTTCGTGGATATGTTCCAGGCCGACCTCGCCGCCGAGATCGGAAGAGCGGTTCAGCAGG	19:T>C	0.09	0.16	183	22	9	214	2	0.17	0.1
100019499|F|0--16:A>G			TGCAGCAGCTGCCACCATGTCACCAGGACCGCTGCCGAGATCGGAAGAGCGGTTCAGCAGGAATGCCGA	16:A>G	0.27	0.32	140	24	45	209	2	0.4	0.11
100055568|F|0--65:A>C	chr5R	691474526	TGCAGCAGCTGCGGGAACAGGCCAGGAATATGCTCCAGGGTGCCGGCACGCCGTAAACTAATGAAATGG	65:A>C	0.12	0.19	18	11	162	191	2	0.22	0.06
100006868|F|0--16:A>G	chrUn	229898520	TGCAGCAGCTGCTACTACTACTACTACTGACATTACATGATGTATAGTTTTTCTTGATGGCCTCGGCGC	16:A>G	0.35	0.35	130	16	65	211	2	0.45	0.08
100003879|F|0--17:A>G	chr1R	38604880	TGCAGCAGCTGCTGGTGAGACCGCTTGCAGTGGGCAATGGCGCCCTGGATGGCCCCCTCCTCCGACCCG	17:A>G	0.11	0.18	10	26	166	202	2	0.2	0.13
100063226|F|0--45:A>G	chr4R	157169966	TGCAGCAGCTGTCGCGCGGAGGGCGGAGTTCGAGCGCGGATAGGCACGTGGAAGGGGCACTGGAGGCGG	45:A>G	0.09	0.16	12	13	173	198	2	0.17	0.07
100007807|F|0--14:C>G			TGCAGCAGCTTGGACCGCTTGTGCACGACCATCATGGTGAACCACGGGATGCTTCCGAGATCGGAAGAG	14:C>G	0.16	0.23	25	7	144	176	2	0.27	0.04
100032527|F|0--22:A>G	chr6R	755142918	TGCAGCAGCTTTCAGTGGCGGTAGGCACTGAATCGACGTGTCCGATGACTGTCCATATAATCCCACGTT	22:A>G	0.36	0.35	56	14	105	175	2	0.46	0.08
100004640|F|0--33:C>G			TGCAGCAGGAAAGCCTGAACTTATATGCAGGTACTGCATCGCAATGATTTCCCCGAGATCGGAAGAGCG	33:C>G	0.2	0.27	13	50	127	190	2	0.32	0.26
100004640|F|0--41:C>T			TGCAGCAGGAAAGCCTGAACTTATATGCAGGTACTGCATCGCAATGATTTCCCCGAGATCGGAAGAGCG	41:C>T	0.06	0.11	10	5	183	198	2	0.12	0.03
100004049|F|0--61:A>C	chr1R	383615419	TGCAGCAGGACCTTGAGAATCCTATCTGCCAACCTCAATTCCTCACGGGGCCTCCGCCTGGAACCGAGA	61:A>C	0.35	0.35	68	10	129	207	2	0.46	0.05
100009932|F|0--46:G>C	chr7R	699614750	TGCAGCAGGAGCTGGTGAGCTCTCTCGCTCCCTAGCAATGTCGCAAGCATCATGCATGAATCCGAGCTG	46:G>C	0.14	0.21	165	12	21	198	2	0.24	0.06
100087893|F|0--36:T>G			TGCAGCAGGAGGCCGATCGCACGGAGCGAGACAGCGTTGGTAGGGGCCGAGATCGGAAGAGCGGTTCAG	36:T>G	0.37	0.36	61	23	114	198	2	0.46	0.12
100017276|F|0--38:A>G	chr4R	64534684	TGCAGCAGGCCCAACAGATAAACACATAACATGCATCTACAACATTAGTTACACATAAAATTCCAGCTG	38:A>G	0.15	0.23	27	4	158	189	2	0.26	0.02
100054077|F|0--50:T>C			TGCAGCAGGCCCTTGGAGAAGGCCAGCGACCGCAGGCGCTTCCGCTCCTCTGCCTCCGAGATCGGAAGA	50:T>C	0.36	0.35	70	13	131	214	2	0.46	0.06
100007829|F|0--60:A>G	chr4R	578539603	TGCAGCAGGCTCCTCCACAGGGTCCTTGAAATTAGCATGTTCACTCAGCTCCTCAAATGCATTAACAAC	60:A>G	0.42	0.37	74	22	106	202	2	0.49	0.11
100067907|F|0--50:C>G			TGCAGCAGGTAGACCAGGTCCTCGTTGGCGCCGGCCTCGGCGCGCGCCAGCGCGAAGTCCGAGATCGGA	50:C>G	0.47	0.37	90	18	101	209	2	0.5	0.09
100025795|F|0--37:G>C			TGCAGCAGGTGAAACCTGACCTGCTGCTCGTGCTCTCGTTTGGTCTCTGCGTCCGAGATCGGAAGAGCG	37:G>C	0.14	0.21	176	8	25	209	2	0.24	0.04
100060277|F|0--13:A>G	chr1R	539954996	TGCAGCAGTCAGAACGCAGAGATTATTTACTGTGCGCACGCGAATACCTGGCTTTCCTAGCTGGAGTGG	13:A>G	0.28	0.32	126	5	48	179	2	0.41	0.03
100031567|F|0--10:C>G	chrUn	381695896	TGCAGCAGTCCCGTGGAGAGGCAAGAAAGGTGGAATGGCATGTGAGTACTATGTACCATGGTACAACCA	10:C>G	0.12	0.19	13	17	144	174	2	0.22	0.1
100058664|F|0--58:C>G	chr4R	798050966	TGCAGCAGTCTGAGGCGAGCAACAGCGGCAATCGGAACTCTTCCTTGAGCAGATGGTGCCACATCATTT	58:C>G	0.07	0.12	12	3	180	195	2	0.13	0.02
100001552|F|0--53:C>G	chr1R	140894102	TGCAGCAGTGAAGTTGGTATCTGGCCATGGAGCTGGTTGTAGGACAGGTTCAGCCGCTCCAGCTTCACG	53:C>G	0.11	0.17	13	19	182	214	2	0.19	0.09
100003639|F|0--13:C>T	chr7R	549708140	TGCAGCAGTGACACCAACAGTGCATTTCACGTAACTGTATTCGCAGTTTTTGCCATGCCTCAGAAATTA	13:C>T	0.06	0.1	4	16	193	213	2	0.11	0.08
100012996|F|0--8:T>C	chr4R	55069630	TGCAGCAGTGCTTCTTCCACGCTGCTCATTTCGGTTAGCTACCTGTAAACTAAGTTTGTTTTTGCTTCT	8:T>C	0.35	0.35	121	16	60	197	2	0.45	0.08
100011189|F|0--13:A>T	chr2R	579806837	TGCAGCAGTTCTTAGGGGCATTTCCTCGAACAGCCTCCTTGCACTCTCCAAGTCCCCGCACTTCACGTA	13:A>T	0.07	0.12	6	15	177	198	2	0.13	0.08
100040301|F|0--8:A>C			TGCAGCATAAAAAATGGAGAATCAGATGAGATCAGCACCAAATGTGATGTGTCTGGACAGTCTCGAGTC	8:A>C	0.28	0.32	45	10	126	181	2	0.4	0.06
100003455|F|0--19:T>C	chr7R	770824921	TGCAGCATAAACCAGTAACTAGAACATCCAACGCATGCCTGTGTGGTACACATCCTTTCCCGATCAGAT	19:T>C	0.11	0.18	147	11	14	172	2	0.2	0.06
100038621|F|0--11:A>T	chr1R	446210124	TGCAGCATACCAGTGTAGATGTTGCAGACAGGAGCGCAAAGCAACTACAGGGAAATGGATGGTACTGTA	11:A>T	0.32	0.34	51	21	118	190	2	0.44	0.11
100031605|F|0--47:A>G			TGCAGCATATGGAAGAAGAAGAAGAAGAAGCGCACCTCTCGGTTGCGACAATGCCCGCCGTCCAAACCT	47:A>G	0.47	0.37	97	9	84	190	2	0.5	0.05
100024479|F|0--5:C>G	chr7R	895211685	TGCAGCATCAGTCCAATTTTTTTCCCCTATATGAACTGCTGAGGAGGAGTTCCACCACAGCAGGTCACA	5:C>G	0.32	0.34	110	14	48	172	2	0.44	0.08
100001659|F|0--38:A>G	chrUn	12008823	TGCAGCATCCGCCACAAAATGAAGCTTCAGGTAGCCACAGTAGCCTTCTTCCTCCTGGTGACCATGGCC	38:A>G	0.29	0.33	128	15	48	191	2	0.41	0.08
100066694|F|0--62:C>A	chr7R	815354709	TGCAGCATCCTCATCTGCATCTGCTTCGGCGCCAAGATCCCCGACGAGCTCATCGTGGAGATCGAGGAG	62:C>A	0.07	0.13	193	11	10	214	2	0.13	0.05
100008047|F|0--55:T>C	chr2R	593469824	TGCAGCATCCTCGGCGTAATCCTCTGCTCGCTCTGCAATGTCAGACACCTTGTCTTTGGCGTTCCTTGC	55:T>C	0.34	0.35	132	18	64	214	2	0.45	0.08
100015813|F|0--47:A>T	chr1R	539728458	TGCAGCATCTCCACCCAGATAAGACATCTTCCAAACCAGCAGAAAACAGTTTCTCCGCGGTAAAGCAGT	47:A>T	0.49	0.37	79	14	81	174	2	0.5	0.08
100123067|F|0--22:A>C	chr5R	481388773	TGCAGCATGAGAAAAAAGTTTGACAATGCGGCAATAGCCTAGGCACTGTTGTGTGAAGTCACCAGCGTG	22:A>C	0.25	0.3	130	8	40	178	2	0.37	0.04
100012396|F|0--64:T>G	chr7R	76917356	TGCAGCATGCATGCCACCAACTCCGTGTCTCAATTGCGACATCTGAGAGATCGCACATGTTTTTTAACA	64:T>G	0.3	0.33	112	16	44	172	2	0.42	0.09
100060757|F|0--15:G>A	chr2R	54374204	TGCAGCATGCATGGAGTTGCCTCACTGCATACGCACGAGAGGCATGGCGTGAGTTCGGTCACCTTGTGG	15:G>A	0.11	0.17	161	6	17	184	2	0.19	0.03
100003968|F|0--29:A>C	chr1R	464707995	TGCAGCATGCCCTCCAGCATGCCTTGGTCAAAGCCATCCAGGTAGAGAGGTTCCTGCTGGCCCATCTCC	29:A>C	0.21	0.28	34	22	157	213	2	0.33	0.1
100037674|F|0--20:C>G	chr7R	104307442	TGCAGCATGCCCTCCTTGGCCGCCTCGGCGATGAACTGCTTCTCAAAGTCGGCCCCCTTGGCCAGCGTG	20:C>G	0.42	0.37	109	31	74	214	2	0.49	0.14
100004353|F|0--40:C>A	chr3R	906967332	TGCAGCATGCCTTGTATGAAGATGAACATGATTATGTGCCCTTTTCACTATGTTTGAACAGATTACTGC	40:C>A	0.39	0.36	127	6	80	213	2	0.48	0.03
100003102|F|0--11:G>T			TGCAGCATGGAGATGCCGCTCCTCACCCTGCCCCCGATCTCCGCCAGATCGCTCCGAGATCGGAAGAGC	11:G>T	0.07	0.13	8	15	191	214	2	0.13	0.07
100000952|F|0--10:A>G	chr6R	637418490	TGCAGCATGGAGGACTACTGGGAGAAGAGACGGTCAAAACAAACAACATACATGCAAGAACTCTCCCTA	10:A>G	0.08	0.14	9	12	164	185	2	0.15	0.06
100000952|F|0--56:A>T	chr6R	637418490	TGCAGCATGGAGGACTACTGGGAGAAGAGACGGTCAAAACAAACAACATACATGCAAGAACTCTCCCTA	56:A>T	0.16	0.23	22	20	164	206	2	0.26	0.1
100020255|F|0--32:C>T			TGCAGCATGGGCAGCATCAAGCGGTCCGACGCCCTCGCCGAGATCGGAAGAGCGGTTCAGCAGGAATGC	32:C>T	0.19	0.26	5	66	132	203	2	0.3	0.33
100035063|F|0--50:G>C	chr2R	851660859	TGCAGCATGTACACGGACAAGGAGGTCTCGGTGATCGCGCGCCAGTCGGTGAACTGCTCGACCGTCCAG	50:G>C	0.12	0.19	181	7	22	210	2	0.21	0.03
100049392|F|0--23:A>G			TGCAGCATGTCCGCCTGCGTCGCAGCGACTCTGGCGCGCACCATCTCCGCGCCCGAGATCGGAAGAGCG	23:A>G	0.29	0.33	52	21	141	214	2	0.41	0.1
100002465|F|0--60:C>T	chr4R	584393059	TGCAGCATGTCCTCCAGCATGCCTTGGTCCAAGCCATCATCCAGGTACAGAGGTTCCTGTCGGCCCATC	60:C>T	0.11	0.17	14	18	182	214	2	0.19	0.08
100008664|F|0--9:T>C			TGCAGCATGTGCACACATGTACCACTATGCGTGATCTCTGCTGAAGTCCGAGATCGGAAGAGCGGTTCA	9:T>C	0.2	0.27	157	24	30	211	2	0.32	0.11
100000979|F|0--19:C>A			TGCAGCATTAGCACCCACTCTAGACAGTGGGATCAAGACCGAGATCGGAAGAGCGGTTCAGCAGGAATG	19:C>A	0.16	0.23	173	12	28	213	2	0.27	0.06
100027072|F|0--60:T>A	chr1R	136413439	TGCAGCATTAGGCACCAAGGTAACTAAGACTGAAACCAGACATTATACATGACAAAGTGCTGAATTGCA	60:T>A	0.45	0.37	96	12	76	184	2	0.49	0.07
100062095|F|0--62:T>G	chr5R	134054678	TGCAGCATTATTCAACACCACTAGCAGTTGCAGCAGCAAGCTAGGCGGGCGATGGATGGATCTATCTAT	62:T>G	0.14	0.22	173	20	21	214	2	0.25	0.09
100007998|F|0--48:G>A	chr1R	358605265	TGCAGCATTGGGTTCATGCCATCAAGGGATTATATATGCTGGCCAACCGTTGAGCTATCACCGTGAGTC	48:G>A	0.43	0.37	98	8	73	179	2	0.49	0.04
100011578|F|0--44:A>G			TGCAGCATTTCTGGCCCAACATGTTGCTATCAATCTGTCATAGCATGGCCGAGATCGGAAGAGCGGTTC	44:A>G	0.35	0.35	56	25	112	193	2	0.46	0.13
100026474|F|0--49:C>T	chr3R	232421527	TGCAGCATTTTGAGACCCTTGTCGTGCACCATTTCCACGAGCGGGAGCGCGCCATCCTGGACGCATGCA	49:C>T	0.09	0.15	10	13	167	190	2	0.16	0.07
100075686|F|0--22:A>C	chr5R	634595034	TGCAGCCAAAAGCGACCACCGTATCGTGGGCAAATACGTGGGCGCCGCATGCACCGAGCCCGCCACGTG	22:A>C	0.1	0.17	16	8	169	193	2	0.19	0.04
100019792|F|0--40:C>G			TGCAGCCAAAATGATCATTTCATTTTCTGCACGAAAAAGCCGCCGAGATCGGAAGAGCGGTTCAGCAGG	40:C>G	0.46	0.37	72	16	85	173	2	0.5	0.09
100013046|F|0--18:C>T	chr3R	943109147	TGCAGCCAAACAAACCAACAAAAGGTTTAACTGAATTGGGCAAGAAAAATACGTACTAGCCATTCAGAT	18:C>T	0.36	0.35	59	23	115	197	2	0.46	0.12
100016478|F|0--30:A>G	chr4R	817205436	TGCAGCCAAACAGAACCACACACAGTGAGCAAGAAAGCATAGCACCAGGAGGGAATCTTCCACGGGGGG	30:A>G	0.13	0.2	20	7	160	187	2	0.22	0.04
100001217|F|0--13:G>A	chr5R	65862267	TGCAGCCAAACATGAAACCATCAATGCTGAAGTTGTTTCCTAGAGTGAGCTTGTCCTTGGCCAAGCTTC	13:G>A	0.38	0.36	110	16	64	190	2	0.47	0.08
100037491|F|0--37:G>C			TGCAGCCAAAGCCTGAGCTGCCCGACCAAGACCGAGTGGACCAAACCGTGGTCGGATGCACTCCCGAGA	37:G>C	0.11	0.17	161	12	14	187	2	0.19	0.06
100028334|F|0--61:C>G	chr7R	769978409	TGCAGCCAAAGTACTTAACGCCAGGCTGGAAAGGCCGTGTGTTTCTACGAGCATGCAGTAGCCCTTGGC	61:C>G	0.29	0.33	50	3	127	180	2	0.41	0.02
100017614|F|0--26:T>C	chr1R	583785452	TGCAGCCAAATACTGCTCCTTGTTTATTACCACTAACTGGTAACCAAGTTGCAGTCTTGGTGATAACAA	26:T>C	0.18	0.25	154	15	28	197	2	0.3	0.08
100024731|F|0--68:C>A	chr6R	749972960	TGCAGCCAAATTTATGCCCATTTGAGAACAGAGTTCCAGCAAAACAGAACAGAAAATACAGTACAGTAC	68:C>A	0.16	0.24	150	3	28	181	2	0.27	0.02
100077885|F|0--46:G>C	chr5R	567168116	TGCAGCCAACGGTGAACGCGAGCAGCCAGTTCCTCATCTACTTCCTGAAAGGTGGTTTCAGTCATCACC	46:G>C	0.3	0.33	51	27	134	212	2	0.42	0.13
100134460|F|0--37:C>G			TGCAGCCAAGGGGGAATGGCGAGCCCGTGTGACACTGCTGGGAGTATGCCGAGATCGGAAGAGCGGTTC	37:C>G	0.47	0.37	102	20	90	212	2	0.5	0.09
100064757|F|0--34:A>G	chr2R	730733086	TGCAGCCAAGTTAACCGCAGATCGAATCGCGGCGATGGATTCGATCCATCCATCGGAGATACAGTATAA	34:A>G	0.44	0.37	101	19	78	198	2	0.49	0.1
100045819|F|0--12:A>G	chr7R	182059911	TGCAGCCAATGGAAGCAGCCCAGGGAGAATCATTGACGAAACAACGCGCGGCCAAAGGGACAACCACAA	12:A>G	0.26	0.31	45	6	133	184	2	0.39	0.03
100076958|F|0--46:C>T	chr1R	383378093	TGCAGCCACACACGTATGCCATTTGCAAGTAAATCAACAATGAACTCGTAACGGGTATAGGAATGGCGA	46:C>T	0.16	0.23	26	8	159	193	2	0.26	0.04
100031097|F|0--10:G>A			TGCAGCCACAGGCTTCTTGGCTTTGGGCTTAGGCACTGCCTGGCCGAGATCGGAAGAGCGGTTCAGCAG	10:G>A	0.1	0.16	186	14	14	214	2	0.18	0.07
100011759|F|0--30:C>A	chr4R	595863887	TGCAGCCACATATTAACTGGTGCTTAATCGCTCATGGCGATCAGGTCTTTGCTGCTCCCTCTGGCCCTG	30:C>A	0.27	0.31	138	7	48	193	2	0.39	0.04
100021219|F|0--55:C>G	chr2R	55203736	TGCAGCCACGGGCCTGCTCGCAAACACGCACGCATTCCAAGGCTCAGACTCCAGACTCCAGAGTCCGCG	55:C>G	0.35	0.35	62	22	127	211	2	0.45	0.1
100056323|F|0--36:G>A	chr2R	855929598	TGCAGCCACGTGTGGATCCCTCCCACCGTTGCTCCAGCCGCCTCGGCTCACAGCCAGACCACACACAAA	36:G>A	0.29	0.33	133	19	48	200	2	0.41	0.1
100004101|F|0--51:T>C	chr4R	674323327	TGCAGCCACTGGCAAGCATGCCTTCGCCATCTTGTACGTCCAGTATCTCTGTAAGGACCTTGAAAGAGT	51:T>C	0.43	0.37	74	29	102	205	2	0.49	0.14
100024210|F|0--44:T>G			TGCAGCCAGCGCAGGAAACCCTTGGCTCTGCTACGGGCTACAGTTGCCGAGATCGGAAGAGCGGTTCAG	44:T>G	0.19	0.26	147	20	26	193	2	0.3	0.1
100007792|F|0--19:C>G	chr2R	25906743	TGCAGCCAGCGTGCGCTTTCGCCGTTGCTTATATAGCCCTAGCAGCCAACGCAAGGCTTCAGTGCAGCA	19:C>G	0.11	0.17	19	5	176	200	2	0.19	0.02
100023601|F|0--62:C>T	chr6R	592746854	TGCAGCCAGGAGTGCAGGGAGCATCAGATCGAGAAAGACGAGCTCAGGGAGCAGAACTGCACCATCACA	62:C>T	0.07	0.12	5	18	184	207	2	0.13	0.09
100003534|F|0--40:T>C			TGCAGCCAGGCACTTTGGCCACCTTCTTCTCCTCCATCACTGACCGAGATCGGAAGAGCGGTTCAGCAG	40:T>C	0.17	0.24	157	29	21	207	2	0.28	0.14
100033680|F|0--22:T>G	chr6R	639394128	TGCAGCCAGTCGCTCGCCGCAGTCGGCCATGCTTGTGCCACGCTTTCACGTCACACGGAAGAATCCGAG	22:T>G	0.29	0.33	43	22	123	188	2	0.41	0.12
100025766|F|0--14:A>T			TGCAGCCAGTTATCAGCTGCCACCGTGCCAGCCTCCCGACAGTGACGTCCCCCGAGATCGGAAGAGCGG	14:A>T	0.14	0.21	23	7	163	193	2	0.24	0.04
100000560|F|0--8:T>C			TGCAGCCATATAGATATGATGAACCCATCTATAGAAAGCAGCTTTAGTAGGTTCCCATCCGAGATCGGA	8:T>C	0.11	0.17	164	13	14	191	2	0.19	0.07
100024936|F|0--59:A>T	chr6R	147105626	TGCAGCCATGATTGTGTAGGTCAGGTTCTTCGTCGGATCACTGCATGGGCTCCCTGCAAATCATTCACA	59:A>T	0.05	0.1	10	0	177	187	2	0.1	0
100043602|F|0--41:T>C	chr1R	109080283	TGCAGCCATGGATATCCAGCTACCAGCACCAGTTTGGGGCTTCACGCCGAGTTCATATGGCTCTTCTGC	41:T>C	0.18	0.25	155	6	32	193	2	0.3	0.03
100027900|F|0--27:G>C	chr7R	199753889	TGCAGCCATGGCTAGCAAGTCCTCCTTGCTAAGCGTGACGCGCGGCAGTGTGCGGCCGATCTTGCTCTC	27:G>C	0.35	0.35	130	16	67	213	2	0.46	0.08
100023226|F|0--41:A>C	chr2R	820810727	TGCAGCCCAAGCCGAAGAAGAGCTTCAAGTAAGGCAAGCGCAACTGTCGCCTGTTCAAATGTCGAACTC	41:A>C	0.49	0.37	98	3	93	194	2	0.5	0.02
100058508|F|0--37:C>G	chr4R	655119176	TGCAGCCCAAGCCGCTCCGCCGCGTGCTCCGCTACCTCGAGGAGGACAAGATAGTGTCGCGGGACCACC	37:C>G	0.16	0.24	24	17	157	198	2	0.27	0.09
100005155|F|0--9:C>T			TGCAGCCCACCTGTCCTGCTCACCATGTCCTTGTCATCCGAGATCGGAAGAGCGGTTCAGCAGGAATGC	9:C>T	0.49	0.37	77	20	82	179	2	0.5	0.11
100021537|F|0--22:A>G	chr4R	558673912	TGCAGCCCACGGATCAGAACGCACTAGATCAGGGGCAGAGAGCTAGCTAGCTAATCGCACCCAGATCCC	22:A>G	0.07	0.12	5	14	164	183	2	0.12	0.08
100080477|F|0--60:A>T	chr2R	737194709	TGCAGCCCAGGCCACAGTTATCTGCGTTTCCCTATCGGCCATCGCCGCAAGGAGACAGGAAAGGAGGGC	60:A>T	0.46	0.37	84	14	100	198	2	0.5	0.07
100019448|F|0--27:A>G	chr2R	765853976	TGCAGCCCATTTAGGCGCCAATACTTCAGTGCAGACTACAGCGTAACAGGTAAGTAAGGGGATCCATGA	27:A>G	0.16	0.23	19	17	140	176	2	0.26	0.1
100002654|F|0--50:T>C	chr2R	790332402	TGCAGCCCCAAATGCAGGTCTCACATGTTTGATGGTTGCAAGGTTTGTCATGCCAGTAAATGGCACAGC	50:T>C	0.42	0.37	106	36	72	214	2	0.49	0.17
100031425|F|0--17:C>T			TGCAGCCCCAATCGAAGCAGCAGCTCCTTTCCGAGCTGCAACCGAGATCGGAAGAGCGGTTCAGCAGGA	17:C>T	0.3	0.33	55	14	137	206	2	0.42	0.07
100057666|F|0--61:A>G	chr5R	544718166	TGCAGCCCCACGACGAGCGCCCATGAGAAGTTGAGCGCGATGGCGGCGCCGATGACGCCAAACCCGAAG	61:A>G	0.39	0.36	95	23	58	176	2	0.48	0.13
100080475|F|0--47:A>G	chrUn	104233622	TGCAGCCCCACGATGTAGTCGATCGCGTCCCCGAGGATCGACGCACGATCCATCTGCCGACATGGATCC	47:A>G	0.24	0.3	124	39	25	188	2	0.36	0.21
100035271|F|0--38:C>G			TGCAGCCCCCAATCGAAGCAGCAGCTCCTTTCCGAGCTCCAACCGAGATCGGAAGAGCGGTTCAGCAGG	38:C>G	0.49	0.37	82	11	85	178	2	0.5	0.06
100009103|F|0--18:C>T	chrUn	359595470	TGCAGCCCCCCTGAACTTCGATCCAAACCCTCGAACCACCAGCATCAGCAGCTCCCATCCCATGGCGCC	18:C>T	0.42	0.37	67	24	96	187	2	0.49	0.13
100049686|F|0--8:C>T			TGCAGCCCCCCTTGTCCCCTCCCCTGTCTGCCTCCTACGCCGCGCCGAGATCGGAAGAGCGGTTCAGCA	8:C>T	0.08	0.14	8	18	185	211	2	0.15	0.09
100011203|F|0--13:C>T			TGCAGCCCCCTAGCTAGAATGATACAGCTCAGCCCCTAGAATGGTACTGCCGAGATCGGAAGAGCGGTT	13:C>T	0.39	0.36	60	18	99	177	2	0.48	0.1
100038681|F|0--50:T>C	chr5R	726612780	TGCAGCCCCGCCGACTCCTCCGTCTCCTTCACGCTCTCCGAGATCACCGCTAACCTCAGCAACCACGCG	50:T>C	0.39	0.36	73	21	120	214	2	0.48	0.1
100041970|F|0--18:G>C			TGCAGCCCCGTACTCATGGTGCTCGAGTCCGCCGACAGCTCCCGCGACCTGGCCGAGATCGGAAGAGCG	18:G>C	0.4	0.37	71	22	110	203	2	0.48	0.11
100039936|F|0--38:T>C	chrUn	330897621	TGCAGCCCCTCGATGGTGGAGCTCCACCCGCAGTGCGTTAGAAACGCGCACACGGCTGCGTGCCCCAGT	38:T>C	0.24	0.3	130	6	38	174	2	0.36	0.03
100025081|F|0--11:A>G	chr1R	557914204	TGCAGCCCGATACGTCATCGTTTGAACAGGAGCGCCTGTTTCTTCCACTTGACTGGTCATCGCCGATGA	11:A>G	0.42	0.37	70	15	101	186	2	0.49	0.08
100025553|F|0--17:C>G	chr3R	22288604	TGCAGCCCGATGCCGCCCACGGGCGCCCCCTTCTCCATGAGCGCGTTGACCTGCGCGATGTACTTCTCC	17:C>G	0.12	0.19	15	21	175	211	2	0.21	0.1
100025720|F|0--67:T>G	chr6R	607263135	TGCAGCCCGCACACATAAACGTAAGGATCGTGGTCATGTCATGTACGTGTACGTCCTTGTTTTGCAGTT	67:T>G	0.26	0.31	52	7	151	210	2	0.39	0.03
100015310|F|0--10:G>C			TGCAGCCCGCGCGCTTCGGTCGCTGCATCTATCCTCCTCTATCCGTGATCCCGTATACCTTGACGCGAC	10:G>C	0.43	0.37	64	21	88	173	2	0.49	0.12
100057518|F|0--11:G>C			TGCAGCCCGCTGACCTGGTCGTCCTGGAACAGCAGGATCACGCCGCCGAGATCGGAAGAGCGGTTCAGC	11:G>C	0.18	0.25	153	19	26	198	2	0.29	0.1
100052612|F|0--25:C>G			TGCAGCCCGTCGTCTTCCTCCACGGCGGTCCTGGGGCCGAGATCGGAAGAGCGGTTCAGCAGGAATGCC	25:C>G	0.43	0.37	73	31	104	208	2	0.49	0.15
100084698|F|0--25:C>G			TGCAGCCCGTCGTCTTCCTCCACGGCGGTCCTGGGGCCGGCACGTCGCCGAGATCGGAAGAGCGGTTCA	25:C>G	0.41	0.37	65	20	96	181	2	0.49	0.11
100027821|F|0--48:A>T	chr7R	722743622	TGCAGCCCGTGGCCAACACCAGCAGCTTGGTCCTCATCAACCTGCTCAAAGGCAAGCCTTTCTTCCGTC	48:A>T	0.46	0.37	97	14	81	192	2	0.5	0.07
100007463|F|0--15:G>C	chr6R	702049799	TGCAGCCCTAAATAGGAAACGCCGTATTTTTCTCCCTTAATTTCTTTTCTAATTCCTAATTTCAACCGA	15:G>C	0.23	0.29	147	10	40	197	2	0.35	0.05
100083880|F|0--25:A>C			TGCAGCCCTACCTCGGCCCCATCGCAGAGCGCCTCGGGGTCGGCCCGCACGCCGAGATCGGAAGAGCGG	25:A>C	0.33	0.35	61	20	131	212	2	0.45	0.09
100003054|F|0--7:C>A			TGCAGCCCTAGTGAGCCCCATGCACTTTACACACTACACGCCCGAGATCGGAAGAGCGGTTCAGCAGGA	7:C>A	0.29	0.33	124	21	44	189	2	0.41	0.11
100017225|F|0--12:G>C	chr2R	711551317	TGCAGCCCTCTGGCCTGGCTCTTGAAAAGAGGGGGAGTGAAACCTATGATGGACACCAATTGTGGCAAT	12:G>C	0.43	0.37	110	17	80	207	2	0.49	0.08
100010007|F|0--21:T>C			TGCAGCCCTGAAAATACACTCTACCACGTCTCCTCGCGCCAGCTCCGAGATCGGAAGAGCGGTTCAGCA	21:T>C	0.42	0.37	105	18	75	198	2	0.49	0.09
100006853|F|0--33:G>A	chr6R	578549235	TGCAGCCCTGCGCTCAGATATAGAAATAACCTGGGGATGCCGTGTGGACTTGTTCCCAGGACCGAGATC	33:G>A	0.42	0.37	117	15	82	214	2	0.49	0.07
100106243|F|0--28:A>C			TGCAGCCCTTCTCCTTCCCCGAGTGGGAAGAGCACCGCCGTCTGTCGGCCGGGAAGACCCGCCGAGATC	28:A>C	0.25	0.3	138	15	41	194	2	0.38	0.08
100018218|F|0--19:T>G			TGCAGCCCTTCTCCTTTGATGAATGGGACGCCCACGCCCGCCGAGATCGGAAGAGCGGTTCAGCAGGAA	19:T>G	0.47	0.37	102	20	91	213	2	0.5	0.09
100047733|F|0--62:A>G	chr6R	654789682	TGCAGCCGACGGCATGTCGTCGAAGATGCCTGTGTTCAAGTTGAACACCAGGGGCATGCGCCATACGTA	62:A>G	0.46	0.37	91	29	76	196	2	0.5	0.15
100085634|F|0--19:T>C	chr2R	116980622	TGCAGCCGACGGGTATTGCTAGTTGTCAGTTCTTTATCCTTGTTGAAGGTGAGAGAGAATGTGGTCAGA	19:T>C	0.24	0.3	44	8	151	203	2	0.36	0.04
100032816|F|0--20:G>A	chr2R	934394658	TGCAGCCGATGCACATCAGCGGTGCAGTTGGCGGCGAGCCTCTGGACGAATTCAGAGTCCTCTTTGCCA	20:G>A	0.07	0.12	189	18	6	213	2	0.13	0.08
100076941|F|0--6:C>T			TGCAGCCGCCAGCCGAGCCGACGAGCTGCTGACCGCGCACGCCGAGATCGGAAGAGCGGTTCAGCAGGA	6:C>T	0.15	0.22	22	13	159	194	2	0.25	0.07
100003150|F|0--39:T>A			TGCAGCCGCCCATCCAATCCATGCATAGCCCTATATATCTTAAACCGAGATCGGAAGAGCGGTTCAGCA	39:T>A	0.31	0.34	120	16	50	186	2	0.43	0.09
100011901|F|0--61:C>G	chrUn	325799284	TGCAGCCGCCGCCCCAGCCGAGGACCTCAAGAGCTTTGATGCCGAGTTCGTCAAGGTCGACCAGGCCAC	61:C>G	0.17	0.24	14	41	153	208	2	0.28	0.2
100067890|F|0--24:G>A	chr2R	888722660	TGCAGCCGCGAGGGCGAACTCGCCGCGAAGCTCTCGTGCGGGGAGGCTCACGAAACACGGCCAGAGGCA	24:G>A	0.26	0.31	138	8	46	192	2	0.39	0.04
100029159|F|0--12:T>C			TGCAGCCGCGGCTACCTGGCCGCCTTCGTCATGCTCATCCGAGATCGGAAGAGCGGTTCAGCAGGAATG	12:T>C	0.16	0.23	135	45	8	188	2	0.27	0.24
100050061|F|0--43:A>G	chr6R	522545607	TGCAGCCGCGGTTAACGCTGGCAACGAGGCATCCCTCGGTGGTAGCCATGGGAACATGGTAGTCACGCC	43:A>G	0.3	0.33	49	19	130	198	2	0.42	0.1
100079311|F|0--48:C>G	chr3R	31510968	TGCAGCCGCTCGTCGGCGCCCTCCAGGTCCCACAGGAACCCCACCTTGCCATGGTCGCTCGGGTCCCTC	48:C>G	0.41	0.37	118	6	80	204	2	0.48	0.03
100066679|F|0--41:C>T	chr5R	733880665	TGCAGCCGCTGCGCCATGATCACGTTCCCGCCAACGGTCGCCGTGTTGCGGACGAACGGCGAGGCCACC	41:C>T	0.1	0.16	13	12	171	196	2	0.18	0.06
100076935|F|0--39:G>A	chr2R	908443165	TGCAGCCGCTGGATCCAGCTCGGTGCATTCTACCCGTTCGCGAGGGCGCACACGGAGAGAACCACCGAA	39:G>A	0.1	0.16	177	4	17	198	2	0.17	0.02
100014195|F|0--63:A>T	chr4R	651084496	TGCAGCCGCTGTCCATGAATCGCAGCTCTGCTGGGCCTGGAGGCCTGGACCTCGATCAACATCAGCCAA	63:A>T	0.4	0.36	68	12	105	185	2	0.48	0.06
100066207|F|0--15:C>G			TGCAGCCGGGCAGGCCGCGGAGATGGATAGCATGTATGCCGGGATGCTCCGAGATCGGAAGAGCGGTTC	15:C>G	0.49	0.37	96	19	90	205	2	0.5	0.09
100002806|F|0--16:C>G			TGCAGCCGTATAGGCACACGTACTTGATCTCGCTTCTGCCGAGATCGGAAGAGCGGTTCAGCAGGAATG	16:C>G	0.1	0.17	19	3	179	201	2	0.18	0.01
100063575|F|0--11:T>C	chr6R	32566282	TGCAGCCGTCATAGCACTCATGGAAGACGACTATGGGCTCTTTAAATTGATTGCTACGTGGAGTACATA	11:T>C	0.45	0.37	78	6	95	179	2	0.5	0.03
100030112|F|0--26:A>T			TGCAGCCGTCGCCATGGGGAGCTGCAACCATGGGAGCAGGCTGCTGCATGCACGAAGCCGAGATCGGAA	26:A>T	0.11	0.18	14	11	152	177	2	0.2	0.06
100000071|F|0--64:G>A	chr6R	765104246	TGCAGCCGTGCCCTTAGTGCTACAGTGTAGTTTAGCATCATGCATGAAGATGAAAGTTGTGTTAGCTTT	64:G>A	0.08	0.14	169	23	5	197	2	0.15	0.12
100040632|F|0--7:G>A			TGCAGCCGTTCTCCAAGGAGGAGTGGAGCTCCCACCGAGATCGGAAGAGCGGTTCAGCAGGAATGCCGA	7:G>A	0.21	0.28	31	21	146	198	2	0.33	0.11
100069149|F|0--42:G>C	chr6R	644889789	TGCAGCCGTTGGACGCACGTAAGAGGCTGCACTCTGTTGCGTGGCATTGGTCGCTCGCTGTCAACCGAG	42:G>C	0.26	0.31	46	19	149	214	2	0.38	0.09
100016716|F|0--7:T>C			TGCAGCCTAACAAGGACAAGTCCGAGCTGCTCCAGCCCAAGGTGCTGCACCCGAGATCGGAAGAGCGGT	7:T>C	0.49	0.37	99	21	94	214	2	0.5	0.1
100010598|F|0--19:G>T			TGCAGCCTACGACCTCAAGGCCGTAGCAGAAATACATGTCATCCGAGATCGGAAGAGCGGTTCAGCAGG	19:G>T	0.38	0.36	69	11	114	194	2	0.47	0.06
100038817|F|0--14:C>G			TGCAGCCTAGGCACCGCCCAGCTGCTAATCGAGCCATCTCGCCGAGATCGGAAGAGCGGTTCAGCAGGA	14:C>G	0.48	0.37	62	76	69	207	2	0.5	0.37
100005207|F|0--43:G>A			TGCAGCCTATATGTTGGCCAGTTGGAAGCCCAACACAGAAGTAGGTGTCCGAGATCGGAAGAGCGGTTC	43:G>A	0.2	0.27	155	18	33	206	2	0.32	0.09
100010421|F|0--39:A>C	chr1R	720454870	TGCAGCCTCAAACTCTCATGCTGTACGTCTTGCAAACCAATTTTCTGTCACCATAGCTCGCCATTTCCA	39:A>C	0.34	0.35	63	15	129	207	2	0.45	0.07
100020158|F|0--20:A>G	chr7R	699467808	TGCAGCCTCATGTGCTACAAAATCCACCTTGATTTAAGTATTAGTTTGACCTCTGATGCCCAGGACCAT	20:A>G	0.35	0.35	58	13	113	184	2	0.46	0.07
100002249|F|0--28:T>C	chr1R	697803604	TGCAGCCTCCATCATTCTCTTCTTCCCCTAAATCTCCATGTTTGGAGCTCTCGTCTTCAGACCCCACTT	28:T>C	0.07	0.13	175	11	9	195	2	0.14	0.06
100019978|F|0--14:G>C			TGCAGCCTCCCCATGTGCTTCTTCTTCCCCTGCTCCATGGCATCCACCGAGATCGGAAGAGCGGTTCAG	14:G>C	0.48	0.37	81	12	88	181	2	0.5	0.07
100009202|F|0--29:G>T	chr3R	85798381	TGCAGCCTCTACGGGGACGCACTGGTGTCGCCCTCGCTGGAGCGCCTCGCCATCGTCCACTGTCACACC	29:G>T	0.1	0.16	17	4	171	192	2	0.18	0.02
100009202|F|0--57:C>G	chr3R	85798381	TGCAGCCTCTACGGGGACGCACTGGTGTCGCCCTCGCTGGAGCGCCTCGCCATCGTCCACTGTCACACC	57:C>G	0.21	0.28	32	23	149	204	2	0.34	0.11
100044430|F|0--54:A>G	chr3R	669539369	TGCAGCCTCTTCGGCAAGCAGGCGCCCCAAACACAGCACCGCGCGGGCGGCGGCAGCGCCAAGGGGAAG	54:A>G	0.23	0.29	33	33	147	213	2	0.36	0.15
100015488|F|0--44:G>A	chr7R	722744089	TGCAGCCTCTTGGAGCTCACCATCCTGTCGTCCTCCCCTTCAACGAACCTGCAAATGACCTTCTGGTTA	44:G>A	0.48	0.37	83	20	91	194	2	0.5	0.1
100003317|F|0--19:A>G			TGCAGCCTGACGACTCAGTATACATGCAGCCAGCTCTTCGCCGAGATCGGAAGAGCGGTTCAGCAGGAA	19:A>G	0.11	0.17	13	18	177	208	2	0.19	0.09
100002903|F|0--59:G>A	chr2R	848742162	TGCAGCCTGCTGTTCTTCCCACTGAAGATCTGGTTAAGGATCACCGCCAGCCTCACGCCGCCCTGAGCG	59:G>A	0.1	0.17	183	16	14	213	2	0.19	0.08
100009868|F|0--28:A>C	chr4R	504780046	TGCAGCCTGCTTGCTTCGATTAGTTCCCAATGAGAGTTTCTGTGGTAAACGTGTCCTTTGTCCTGGTTT	28:A>C	0.45	0.37	70	21	89	180	2	0.49	0.12
100000892|F|0--64:A>T	chr4R	895611771	TGCAGCCTGGTGTCATCTGCCTCTGTGGTGTCCATGAGGAATAGTTCCTCCTTTTTCTTGCGCAAGCCC	64:A>T	0.15	0.22	15	30	156	201	2	0.25	0.15
100021348|F|0--35:A>G	chr3R	69030736	TGCAGCCTTAGGAGCACATCCAGCAAGTCTTCGCTATCTCGAGCAGCGGAAGACGCACCAGCAGCAGTT	35:A>G	0.23	0.29	39	13	146	198	2	0.35	0.07
100035746|F|0--34:T>C	chr2R	747246978	TGCAGCCTTGCAGGAGGGAGGGAGGAGGGCATGGTTCTCGTCTCGTCGCCTGGCTTTCTCATGGCCTCT	34:T>C	0.11	0.18	179	18	14	211	2	0.19	0.09
100061552|F|0--14:T>C	chr5R	543656187	TGCAGCCTTTGCCTTGGTGCAGCGGCGCGTCGTCAAAACTGGCAGCTAGCCAGATGGTGTCCACACTCT	14:T>C	0.36	0.35	114	26	58	198	2	0.46	0.13
100052496|F|0--36:C>G	chr6R	775271400	TGCAGCGAACACAGACGGTTGTTCCAGACGTACATACGCATCGGTTAGGCATGCAGGGTCACGTCAAGA	36:C>G	0.08	0.14	13	9	188	210	2	0.15	0.04
100008603|F|0--6:G>T	chr5R	621508274	TGCAGCGAACAGTAAAAGATTTTTAGCGTGGGACAGCAACGTTGGATGTTGTTGCACAAAGATCGTGCC	6:G>T	0.13	0.2	23	6	177	206	2	0.22	0.03
100023113|F|0--8:A>C	chr7R	96426663	TGCAGCGAACCAAGCTTCGATTCTTCGAGGATCATAAAGAAACTAGGCGGCCGCTTTGTAGGACGCCTC	8:A>C	0.32	0.34	55	21	131	207	2	0.43	0.1
100016363|F|0--35:C>T			TGCAGCGAAGAAGAGACTTCTCCAACATCATAGCCCCTGGGGTCCCGAGATCGGAAGAGCGGTTCAGCA	35:C>T	0.28	0.32	37	24	114	175	2	0.4	0.14
100032688|F|0--35:C>T			TGCAGCGAAGAAGAGACTTCTCCAACATCATAGCCCCTGGGGTCCCGGGAGAAGGAGAACCCGAGATCG	35:C>T	0.27	0.32	36	23	116	175	2	0.4	0.13
100007123|F|0--30:G>A	chr5R	864957081	TGCAGCGACAGAGAGTGGACCTTGATGTCGGATGTACATGCAACCAAACGGAGCTCTCGCAGACGCGGG	30:G>A	0.15	0.22	132	39	7	178	2	0.25	0.22
100021752|F|0--39:T>G			TGCAGCGACAGGTTGCAGAGAAAACTCACCTGAGTACGCTAGACACGGCAGCAGACAACTTTTCCGAGA	39:T>G	0.36	0.36	114	16	61	191	2	0.46	0.08
100026746|F|0--25:G>C	chr6R	831489868	TGCAGCGACGCCGAGTGGACAGTCAGGTTTTCGTCACGATTCAAGAGACACTTCATCTTGAGCCTCAAC	25:G>C	0.33	0.34	132	10	61	203	2	0.44	0.05
100003674|F|0--32:C>T			TGCAGCGACGCCGTGCCATGCACCAACATCACCCTCTCCGAGATCGGAAGAGCGGTTCAGCAGGAATGC	32:C>T	0.14	0.21	19	17	162	198	2	0.24	0.09
100083099|F|0--13:G>T			TGCAGCGACGGCCGCCAGTGCCCCCTCGTCTCGTGATCGTCGTGGTAGCACACCGTGCCGAGATCGGAA	13:G>T	0.5	0.37	94	27	92	213	2	0.5	0.13
100028115|F|0--62:G>A	chr6R	606281283	TGCAGCGACTCCCCGATGGCGTGCGCCTCCCGCAGCCGCATGTCCTCCGAGAGCACGATGTCGACCTGG	62:G>A	0.21	0.27	165	10	39	214	2	0.33	0.05
100018250|F|0--48:T>C	chr3R	623300273	TGCAGCGACTGCAAGCTTTTGCCCTCCTTTCTTATTTCTTCTTTCTTTTCGTGATTTCGTTGCCGAGAT	48:T>C	0.12	0.18	177	17	16	210	2	0.21	0.08
100043793|F|0--14:C>G	chr4R	771950272	TGCAGCGAGAGCGGCCGCGCGCTGGTGTCGCACCACTCGGTCCTCATCTTCGAGGCCTTCTCCGCGACG	14:C>G	0.1	0.17	19	6	189	214	2	0.18	0.03
100143711|F|0--41:G>T			TGCAGCGAGAGGAGCACCTTTTTGAGCCGCTCCCTGGCTTGGGCGTCGATGAGGTTCCCTTCCCCGTCG	41:G>T	0.48	0.37	83	8	90	181	2	0.5	0.04
100100549|F|0--49:A>T	chr6R	643020962	TGCAGCGAGCCTGCAAGGACCATTTCTCGCGGCGGCATTGGGGGATTGGATTTGGGATGAGCTTCAAGG	49:A>T	0.27	0.32	49	9	138	196	2	0.4	0.05
100075649|F|0--27:A>C	chr2R	787852238	TGCAGCGAGGCCGTGCAGGAGCGGCGCATGCGAGCATCTGGGGCTCGATCCATGGGCCGATCTCCTGCT	27:A>C	0.46	0.37	89	15	105	209	2	0.5	0.07
100025882|F|0--29:T>C	chr1R	653211399	TGCAGCGAGGTCGCTAACTCGGGAGCAGGTGAAGCCGTGACCTTGGCATAGAGCTACTTTGTCGGGCAT	29:T>C	0.35	0.35	119	12	60	191	2	0.45	0.06
100021422|F|0--46:C>G	chr4R	724734119	TGCAGCGATCAAGCAAGTAGCAACGTCATCAGTCGAATGTCAACTACATATATATTCGAATTGAAAGAA	46:C>G	0.08	0.13	11	6	162	179	2	0.14	0.03
100096277|F|0--41:C>T	chr3R	52816461	TGCAGCGATCGCGGTGATTACCGTGTGCTCGATTGCCGTCACGGCCGTGTCCTCGTCAAAGACAGGTGG	41:C>T	0.11	0.18	16	13	169	198	2	0.2	0.07
100016213|F|0--36:G>C	chr3R	906090786	TGCAGCGATGCTTCCCGATCTGCGCCTTCTTCAAGGGCGTGGAGCAACGAAGGTCGGCTCCTTCCTTCT	36:G>C	0.48	0.37	83	25	89	197	2	0.5	0.13
100079287|F|0--15:G>A			TGCAGCGCAAGCGCCGCCACGGTCACGGCCTCCTCGCGATCGTACGCGTCTCCCAGCCTCCGAGATCGG	15:G>A	0.1	0.16	171	15	12	198	2	0.18	0.08
100002503|F|0--21:A>G			TGCAGCGCAGAAACAGGGCAGAGAGGTCAGGATTCGCCGAGATCGGAAGAGCGGTTCAGCAGGAATGCC	21:A>G	0.09	0.16	8	24	182	214	2	0.17	0.11
100007165|F|0--40:A>C	chr5R	458987269	TGCAGCGCATAAGGTCCTTCAGCATCTTCTCCTTCCCGTCATCGTCCTTCCACACCGCGGAGCCCAGCC	40:A>C	0.2	0.27	164	15	35	214	2	0.32	0.07
100084629|F|0--20:C>G	chrUn	405776564	TGCAGCGCATCCACCGCCTCCGTCGCCAGATCCAGAGCAAGTGCACGCAGATCAAGCGGTGGCGCACGC	20:C>G	0.4	0.36	42	67	82	191	2	0.48	0.35
100084629|F|0--21:G>A	chrUn	405776564	TGCAGCGCATCCACCGCCTCCGTCGCCAGATCCAGAGCAAGTGCACGCAGATCAAGCGGTGGCGCACGC	21:G>A	0.19	0.26	141	8	29	178	2	0.3	0.04
100062829|F|0--19:C>T	chr4R	884269517	TGCAGCGCATCGGTGGGCGCTGGATGTCCGCGCCTAACCTGGAGACCATCAAGATCAGGGGTTGCTGGA	19:C>T	0.27	0.32	43	8	123	174	2	0.39	0.05
100068372|F|0--56:C>G	chr1R	438514661	TGCAGCGCATGCAGCAGGCCGACATGGGACTGGGAGCCAAGGGAAAACGTGTCCTCCGCCGCCGTGCAA	56:C>G	0.18	0.25	25	25	155	205	2	0.3	0.12
100005749|F|0--19:C>T	chr7R	618459904	TGCAGCGCATGTCGTACCTCAACGTGGGCATCTACCCGTTCACGTCCCTCTTCCTCATCATGTACTGCC	19:C>T	0.34	0.35	67	10	137	214	2	0.45	0.05
100064744|F|0--14:T>C			TGCAGCGCCACCCATTTGGCGCCGAACCGCGGGATCTGCCGCTGCCGAGATCGGAAGAGCGGTTCAGCA	14:T>C	0.38	0.36	119	24	68	211	2	0.47	0.11
100006679|F|0--32:G>C	chr3R	696474382	TGCAGCGCCATCATCATGGGCACCTGCCTGGCGCAGTTCCAGACCTTCTCCATCCAGCAGGGCTCCACC	32:G>C	0.18	0.25	163	24	27	214	2	0.3	0.11
100014350|F|0--24:G>T	chr4R	15781339	TGCAGCGCCCGCGCCGCAAAGCCTGTTGGAAGTCTAATTTAAGGACCATCGCTTCCTCTTAACCGCTGT	24:G>T	0.47	0.37	63	54	73	190	2	0.5	0.28
100051307|F|0--32:T>G			TGCAGCGCCGACTTGTCGAGCACCTGGTCGTCTGCCAGCGACCCCGAGATCGGAAGAGCGGTTCAGCAG	32:T>G	0.4	0.36	116	21	73	210	2	0.48	0.1
100057197|F|0--6:G>A			TGCAGCGCCGCAGTCCTTCATCGGCATCAACTACGGCGACATCGCCGACAACCTGCCGCCGCCGAGATC	6:G>A	0.15	0.22	169	25	20	214	2	0.26	0.12
100005492|F|0--17:A>G			TGCAGCGCCGCCGTACCATGCACTAACATTACCCTCTCCGAGATCGGAAGAGCGGTTCAGCAGGAATGC	17:A>G	0.17	0.24	23	26	162	211	2	0.28	0.12
100005492|F|0--31:C>T			TGCAGCGCCGCCGTACCATGCACTAACATTACCCTCTCCGAGATCGGAAGAGCGGTTCAGCAGGAATGC	31:C>T	0.07	0.12	9	10	180	199	2	0.13	0.05
100052734|F|0--45:C>A			TGCAGCGCCGCTGTTGGTTCTAGTGCTCCTCCTGCGTGTCAAGGCCGCGCTCCGAGATCGGAAGAGCGG	45:C>A	0.48	0.37	86	7	92	185	2	0.5	0.04
100008466|F|0--15:G>A	chr4R	681769298	TGCAGCGCCGTGTGTGGGCATTTACTTGCTTCCTTTTTTGCACCCGACTGAAAAAAGACTTTGGCAGTA	15:G>A	0.19	0.26	136	11	28	175	2	0.31	0.06
100036914|F|0--13:C>T			TGCAGCGCCTCACCGCGCGCTCCAGCCGCTACCTCTGGTTCCCCGAGATCGGAAGAGCGGTTCAGCAGG	13:C>T	0.13	0.2	18	19	177	214	2	0.22	0.09
100034161|F|0--55:C>T	chr1R	726552747	TGCAGCGCCTCGACCTCTCCGCCTTGCCCGCGCTCCAGGTGCTCGACCTCTACGACAACGACCTCGCCG	55:C>T	0.27	0.32	50	6	137	193	2	0.4	0.03
100061369|F|0--14:G>A			TGCAGCGCCTCGAGGAACTTGTCGTGCTCGGGCTCGGTCCAGCTCTCCCGAGATCGGAAGAGCGGTTCA	14:G>A	0.11	0.18	175	12	17	204	2	0.2	0.06
100036740|F|0--67:C>T	chr5R	802055575	TGCAGCGCCTTGTCTCTGGTCATCCCGCCCTCCACGGCGACGAACAGCAGGATCCCCAGCGTCTTGGCC	67:C>T	0.1	0.17	17	6	174	197	2	0.18	0.03
100072042|F|0--9:C>T	chr2R	19126900	TGCAGCGCGCAGGGGGAGAGTTCACCGTCACAGGACATGTCCTTCAACCTGCGCGGTGGCCTGTTCCTG	9:C>T	0.37	0.36	28	75	74	177	2	0.47	0.42
100076483|F|0--17:C>G			TGCAGCGCGTCGAGGACCAGCAGCTCGTCGTCCTGCGCCGAGATCGGAAGAGCGGTTCAGCAGGAATGC	17:C>G	0.42	0.37	76	10	106	192	2	0.49	0.05
100072686|F|0--37:C>T	chr6R	474902785	TGCAGCGCGTCGGCGTCGAGCCGCAGTTCCGCAACGGCCTCCGCGTCACCGACGCGCTCACCATGGAGG	37:C>T	0.08	0.13	11	8	175	194	2	0.14	0.04
100072686|F|0--55:G>T	chr6R	474902785	TGCAGCGCGTCGGCGTCGAGCCGCAGTTCCGCAACGGCCTCCGCGTCACCGACGCGCTCACCATGGAGG	55:G>T	0.07	0.12	11	7	183	201	2	0.13	0.03
100011922|F|0--49:G>C			TGCAGCGCTACCTTGCTGCTGTAGCTGCATGACAGAGCCAGGCGGCCCCGCAGCTCCGAGATCGGAAGA	49:G>C	0.17	0.25	165	22	26	213	2	0.29	0.1
100021536|F|0--55:C>T	chr4R	163122818	TGCAGCGCTCATGGATCATCCTCTTGGCCTGCGCCGTCGCCATGCTCCCCATCTACGTCTTCACCTCCC	55:C>T	0.37	0.36	64	32	118	214	2	0.47	0.15
100049273|F|0--8:T>C	chr3R	610108538	TGCAGCGCTCCTCACCTGGTGCCAGCCCGTCAATTCCCATCCAGCGGCGCAGCAGGACACTCTTTCGCT	8:T>C	0.34	0.35	115	10	57	182	2	0.45	0.05
100029482|F|0--61:A>C	chr6R	659670524	TGCAGCGCTCGAGCTTGGCGCACTCCCGCCTGCTCTGCGGGATGCGCAGGAGGCTCATGCCAACGGCGA	61:A>C	0.28	0.32	144	22	48	214	2	0.4	0.1
100033727|F|0--38:G>T			TGCAGCGCTCGGGGATTGGGCAGGTGCTAGTTAATCCAGCCATGGCGCCGAGATCGGAAGAGCGGTTCA	38:G>T	0.16	0.23	25	10	158	193	2	0.26	0.05
100006366|F|0--40:A>T			TGCAGCGCTGCACAACTCGGACATGATGATCTCCTACCGTAACCGAGATCGGAAGAGCGGTTCAGCAGG	40:A>T	0.07	0.12	7	16	188	211	2	0.13	0.08
100069661|F|0--66:G>C	chr2R	134838872	TGCAGCGCTGCCATCGGCGTGGCCGAGGAGCTCGGCATCCCCGCCTACTTCTTCTGCACCTCAGGGGCC	66:G>C	0.24	0.3	154	16	44	214	2	0.37	0.07
100025236|F|0--48:G>T	chr3R	736466001	TGCAGCGCTGTATAATGCATAGTTTTGGGAAGCTAATGTTTGTCAGCTGTACGAGCGTTTTCGTTTGTT	48:G>T	0.35	0.35	66	18	130	214	2	0.46	0.08
100008359|F|0--55:A>C	chr4R	474164055	TGCAGCGCTTAAAACGTTGGGGAGCCATGGTTATGGTTTTATAGAGGAGCCAATCATTTATAAAACTGA	55:A>C	0.12	0.19	17	16	178	211	2	0.21	0.08
100009075|F|0--40:C>T	chr4R	174209068	TGCAGCGCTTCAGGGCTGAGCTTAATCTGAGCGCATGTATCGTCGTCCCAGCTGCGTCGGAACGGTTGC	40:C>T	0.08	0.13	8	14	176	198	2	0.14	0.07
100056086|F|0--41:C>G	chr4R	876102124	TGCAGCGCTTGCCTAAACATCCCGGAGCCGCGGGGCACGCCCAGAGCCTCGGCGCATGCCACCATCGTC	41:C>G	0.42	0.37	81	16	117	214	2	0.49	0.07
100015456|F|0--8:T>C	chr4R	589576118	TGCAGCGCTTGCCTGAACATCCCTGAGCCCCGAGGCACACCTATACCTTCAGCGGATGCGACCACTGCC	8:T>C	0.2	0.27	152	8	34	194	2	0.32	0.04
100003728|F|0--53:T>C	chr7R	703203060	TGCAGCGGAAAATACATTATATCCCTGGATGGCTGGATGTCCCGAATAACTGATGGTGATACAACGTTC	53:T>C	0.46	0.37	105	21	88	214	2	0.5	0.1
100046414|F|0--44:G>T	chr6R	665064567	TGCAGCGGACATGTCATTCTTCTTCGTCTGCGACAGCTGTGTGCGAAGTTGACGCACGCTGGCCCGAGA	44:G>T	0.43	0.37	60	41	88	189	2	0.49	0.22
100080414|F|0--41:A>G	chr7R	254721129	TGCAGCGGACCAACAGAAGAAGAGCAGCGTAGAGACGGAGTATTGTTTTATTTATCATCACTCTTAGCA	41:A>G	0.44	0.37	76	11	97	184	2	0.49	0.06
100063021|F|0--19:C>G			TGCAGCGGAGCTGCTCCGCCTCGCCGTCCTACGACGAGCGCCTCTCCTTCAGCCGAGATCGGAAGAGCG	19:C>G	0.35	0.35	62	27	125	214	2	0.46	0.13
100054415|F|0--58:T>G	chr7R	73455246	TGCAGCGGAGGCGATCAGGAGCTTCTTGACCTGCTGCTCCTGGACGGAGGGAAAGCGCTGCTGGGAGCC	58:T>G	0.35	0.35	119	10	62	191	2	0.46	0.05
100017141|F|0--41:C>A	chr5R	486850144	TGCAGCGGATTTCTAACATCCCCTTTTATCTGGATGGTGATCTTGCAATTTATTTTTATGCGATTTGCA	41:C>A	0.07	0.12	181	3	12	196	2	0.13	0.02
100011015|F|0--25:A>G	chr1R	13700006	TGCAGCGGCAAGGACACCGCCACAGATCAGCATCGCTCTAATGATGCTCCTCGCCCGAATCCATGCCGA	25:A>G	0.24	0.3	36	16	133	185	2	0.36	0.09
100069132|F|0--42:A>G	chr2R	179456313	TGCAGCGGCACAGCTCGACCCAGGGACGCGGGCATTATTACCATAGACGCGCTCGGAGATCTCGAGCAG	42:A>G	0.23	0.29	37	22	154	213	2	0.35	0.1
100047913|F|0--49:T>C	chr7R	75356114	TGCAGCGGCACGACAAGAAGGTCCAGTCGGAGCTGCACCAGCTGGTCATTGAGATACTCACGAGTCTCG	49:T>C	0.38	0.36	66	12	111	189	2	0.47	0.06
100039422|F|0--46:C>T			TGCAGCGGCATCCCGAAGCACGCAGCCTTTTCCCACCCCCTCTTTCCCCGCCCGAGATCGGAAGAGCGG	46:C>T	0.08	0.14	10	13	174	197	2	0.15	0.07
100112684|F|0--22:C>G			TGCAGCGGCCGCCGCCGCATCGCCGCGGGCAGCACGAAGTAGAGCTGCCCGAGATCGGAAGAGCGGTTC	22:C>G	0.32	0.34	52	17	122	191	2	0.43	0.09
100073344|F|0--42:C>T	chr3R	686159160	TGCAGCGGCGATGTGGTCGCCGCGCCACTTACGTCCGTGCATCATTCGGTCCAGAGGCATGGCGCGCCG	42:C>T	0.22	0.29	35	25	153	213	2	0.35	0.12
100055047|F|0--65:A>C	chr5R	777565809	TGCAGCGGCGGCAACCTGCACTCCCTCCGCCAGAAGCAGCCCAACAAGCACTTCACCGAGCACGCAGCC	65:A>C	0.23	0.29	38	12	145	195	2	0.35	0.06
100048690|F|0--41:C>T	chr4R	587357203	TGCAGCGGCGTCAGCTCGTGGTTGTACACGTCCGCCATGGACGCCTCCTCCTTGCCCTTGGGCTGCCCG	41:C>T	0.27	0.32	43	9	122	174	2	0.4	0.05
100028636|F|0--20:T>G			TGCAGCGGGACGAGGAAGTTTGCGCCGCCCTCCTTGCCGAGATCGGAAGAGCGGTTCAGCAGGAATGCC	20:T>G	0.5	0.37	102	10	101	213	2	0.5	0.05
100068878|F|0--22:A>C			TGCAGCGGGAGCACCAGGCGCCAAACATCTCGGAGATGAAGCCGAGATCGGAAGAGCGGTTCAGCAGGA	22:A>C	0.34	0.35	119	12	59	190	2	0.45	0.06
100045558|F|0--45:C>G	chr5R	716357415	TGCAGCGGGCAGCGACTCCACCCCATTCATGGTCGTCCTCATGGCCGTCTCCATCGAACCGTCCGAGAT	45:C>G	0.29	0.33	49	23	136	208	2	0.41	0.11
100047633|F|0--52:C>T	chr2R	85553445	TGCAGCGGGTCGCGTACCTCAACGTCGGCATCTATCCGTTCACCTCCATCTTCCTGCTCACCTACTGCT	52:C>T	0.4	0.36	70	12	110	192	2	0.48	0.06
100006648|F|0--46:C>G	chr6R	704730131	TGCAGCGGGTCGTGGATCTGGACTTGCATCTGGGTTGAATGGGGATCAGAGGAATTGAGAAGAAGAAAA	46:C>G	0.37	0.36	65	27	122	214	2	0.46	0.13
100029841|F|0--29:C>G	chr3R	715363930	TGCAGCGGTAAGTAATTAGGCATGGAGGACGTACGGACACTAGTCCGTGAGATGGGCCATAAACCACGG	29:C>G	0.47	0.37	91	23	78	192	2	0.5	0.12
100071076|F|0--40:G>A	chr1R	427440278	TGCAGCGGTAGTAGCCCCTCGGGTACGGCGACCCCTTGATGGGCTTCTGCCCGTACTTCCTCCACGCCC	40:G>A	0.38	0.36	67	12	114	193	2	0.47	0.06
100032772|F|0--18:G>C	chr4R	686904704	TGCAGCGGTCCAGCTCAAGCGACCCATGGAGCAGTTCCACCACGGCCACCACGTGCGGCTGCGGAACCG	18:G>C	0.25	0.31	151	11	47	209	2	0.38	0.05
100020564|F|0--13:T>C			TGCAGCGGTGACATGCCAACGTTTGCCGACTGCTTGTGTACCGAGATCGGAAGAGCGGTTCAGCAGGAA	13:T>C	0.33	0.34	110	27	47	184	2	0.44	0.15
100038606|F|0--68:T>C	chr6R	49958004	TGCAGCGGTGTGGGAGAGGACAGCGCGTCTTTGCCCACCAAGTGTTCGACGAAACGCCTCGGCTGCATT	68:T>C	0.09	0.15	169	5	15	189	2	0.17	0.03
100060729|F|0--20:T>C	chr3R	175138282	TGCAGCGGTTACCTCAGTGGTCGCGGAGATGGATTTGACGACGTCTGGGACGATGGATCTGAGCTGTGG	20:T>C	0.47	0.37	100	26	87	213	2	0.5	0.12
100076476|F|0--27:A>T	chr6R	699759377	TGCAGCGGTTATTTTCGATAAGCATCGAGATGCACAGCCTGCCGCCTCCAAGGTACGCAAGCTCGGTGC	27:A>T	0.25	0.31	48	12	154	214	2	0.38	0.06
100076890|F|0--50:T>C			TGCAGCGGTTGGCGTCGACAGTCCTACACCTCAAACTTCCCCCTATTGCGTACCTCGCCACCGAGATCG	50:T>C	0.38	0.36	107	18	63	188	2	0.47	0.1
100014519|F|0--55:A>T			TGCAGCGTAGGAGATAGGGATTAGGGAAAGCATGTCAGCATGATAATCGGCAAAAATTTGTTCGAGGAT	55:A>T	0.18	0.25	28	6	138	172	2	0.3	0.03
100053329|F|0--16:C>G			TGCAGCGTATCCATCTCGCCGATGGTCGCCGGGATCGCGCCGAGATCGGAAGAGCGGTTCAGCAGGAAT	16:C>G	0.22	0.29	36	12	139	187	2	0.35	0.06
100053329|F|0--28:C>G			TGCAGCGTATCCATCTCGCCGATGGTCGCCGGGATCGCGCCGAGATCGGAAGAGCGGTTCAGCAGGAAT	28:C>G	0.31	0.34	47	21	116	184	2	0.43	0.11
100032032|F|0--5:C>A			TGCAGCGTCACCGCCGCCGCCTCGTGCTTGGGGCTCTCCGAGATCGGAAGAGCGGTTCAGCAGGAATGC	5:C>A	0.2	0.27	161	20	33	214	2	0.32	0.09
100026975|F|0--38:A>G			TGCAGCGTCACCGCCTGCTCGCGCACCTCCACCAGGTCATCGTAGATCACCGCCGAGATCGGAAGAGCG	38:A>G	0.28	0.32	95	94	8	197	2	0.4	0.48
100007479|F|0--67:G>C	chr6R	827871320	TGCAGCGTCACCTTTGTCCAGCAATCATTTGATGCCTCCGTTTCATCCTCTAATCATGCATGGTAGTGG	67:G>C	0.42	0.37	70	15	100	185	2	0.49	0.08
100021751|F|0--14:G>A	chr3R	117446347	TGCAGCGTCAGGCAGAACACAAACAAAACAAACAAACCAAGCTTACTTCCTCGTACAACATCCAGAGCA	14:G>A	0.22	0.29	154	23	36	213	2	0.35	0.11
100062248|F|0--41:C>T			TGCAGCGTCAGGCCATCCCTGAAGATATCGTCCGTCGGCGACCTCCCGAGATCGGAAGAGCGGTTCAGC	41:C>T	0.07	0.13	6	14	158	178	2	0.14	0.08
100017646|F|0--27:C>T			TGCAGCGTCAGGGAACGGACCTGCCAGCCTAGATTAACTAGAAACCGAGATCGGAAGAGCGGTTCAGCA	27:C>T	0.07	0.12	9	12	191	212	2	0.13	0.06
100055043|F|0--23:T>C			TGCAGCGTCCGCGGATACTGCTCTGCCGAGATGCGCCTCGACATCCCGAGATCGGAAGAGCGGTTCAGC	23:T>C	0.38	0.36	124	12	73	209	2	0.47	0.06
100016848|F|0--20:T>C	chr7R	112591572	TGCAGCGTCCTCCAAGCCTATCGCGGCCAGCCCCTAGCCTTCTACAGTGAGCTACTGCGGCTCTGAAAA	20:T>C	0.08	0.14	163	6	12	181	2	0.15	0.03
100063196|F|0--19:T>C			TGCAGCGTCGCCGCCTGCTTGCGCACCGCCACCAGGTCGTCGTAGACCACCGCCGAGATCGGAAGAGCG	19:T>C	0.32	0.34	34	53	104	191	2	0.43	0.28
100003321|F|0--6:G>A	chr6R	872505840	TGCAGCGTCTGAATATGAACTGCATTTCGTTGAAAAGAATATGAACTAGTCCTTTCCGAATCTTTGCTT	6:G>A	0.1	0.16	154	5	15	174	2	0.18	0.03
100008208|F|0--16:A>G			TGCAGCGTGACACGATACCCTGCCTGGAGCTACAGCCGAGATCGGAAGAGCGGTTCAGCAGGAATGCCG	16:A>G	0.33	0.35	55	15	117	187	2	0.45	0.08
100049376|F|0--7:T>C	chr6R	857405700	TGCAGCGTGCCGCCGTCCTTGGAGAAGCGCACGCGCTCGACCTTGCCCTTCTTGACGGCCGCGAGGAAC	7:T>C	0.25	0.31	131	9	41	181	2	0.38	0.05
100057911|F|0--41:C>A	chr2R	260280885	TGCAGCGTGCTGCTGGCCCTCATCATCGTCCTCGCCATCGTCTTCGTCGCGCTCTACTTCACCGTGTTC	41:C>A	0.1	0.17	170	15	13	198	2	0.19	0.08
100057779|F|0--35:T>C			TGCAGCGTGGGGATGAGGATGGCCATGGCGAGCTGTGGCCGAGATCGGAAGAGCGGTTCAGCAGGAATG	35:T>C	0.35	0.35	61	28	123	212	2	0.46	0.13
100054177|F|0--21:C>T	chr6R	704740382	TGCAGCGTGTAACAGCGATCGCGCTGATGCTGCTGCTGGAGGCGGAGCTGGACCACGGAGTCCATGGCG	21:C>T	0.1	0.17	14	12	167	193	2	0.19	0.06
100030971|F|0--45:G>A	chr6R	102506023	TGCAGCGTGTATGTCATTTGAGATCCTACCGATGACTGTATTCAGGATAACGCGAGTACAAAACCAGCC	45:G>A	0.1	0.16	181	10	15	206	2	0.18	0.05
100037259|F|0--23:A>G			TGCAGCGTTGCTGCGCAGGTTGTAGCCCAATAGCGCGCTTTTTTCCTTGTCCGAGATCGGAAGAGCGGT	23:A>G	0.31	0.34	50	26	125	201	2	0.43	0.13
100009092|F|0--19:C>T			TGCAGCTAAAATGACTCGGCGCCGCAGCTTCTAGGACGGCTTTGTGCAGCATTCCGAGATCGGAAGAGC	19:C>T	0.12	0.18	20	9	184	213	2	0.2	0.04
100020847|F|0--14:G>A	chr5R	683757778	TGCAGCTAAATGCAGTAGAGCAGAACCACCTAGTATTTGGACACCACTTCCACATTTCGACCTGTCCCT	14:G>A	0.13	0.21	154	7	21	182	2	0.23	0.04
100020847|F|0--65:C>G	chr5R	683757778	TGCAGCTAAATGCAGTAGAGCAGAACCACCTAGTATTTGGACACCACTTCCACATTTCGACCTGTCCCT	65:C>G	0.16	0.23	26	7	149	182	2	0.27	0.04
100001392|F|0--34:T>G			TGCAGCTAAATGGGTCAAACGGTTACGAGTAAAATGCACAAATTTGGCACATGGTCAGGCACCGAGATC	34:T>G	0.39	0.36	118	15	74	207	2	0.48	0.07
100036105|F|0--39:G>A	chr5R	610311318	TGCAGCTAACGACAAGGACTGGTCGAAGATCGGACACTGGTCGAGTTGAATTTGACATAGCGATTGAGA	39:G>A	0.06	0.1	179	8	7	194	2	0.11	0.04
100028301|F|0--44:T>G	chr6R	724406563	TGCAGCTAATGCTAGCCGCAGGCTCTCCTGTCACTAGGTCCTGGTACCCCTCCTAATCATATATACCCT	44:T>G	0.32	0.34	118	10	54	182	2	0.44	0.05
100021436|F|0--8:C>T	chr5R	706977146	TGCAGCTACATCGTAAGCTTGAGCTAGAACCGTAATTAGGTGAATCAATCCGCCAGCAGCAAAAAAAAA	8:C>T	0.4	0.37	73	8	111	192	2	0.48	0.04
100006483|F|0--29:C>G			TGCAGCTACCTCCTCAGCCTCCTCCGCCCCGCCCTCATCCGAGATCGGAAGAGCGGTTCAGCAGGAATG	29:C>G	0.31	0.34	52	10	122	184	2	0.43	0.05
100054176|F|0--7:A>T			TGCAGCTACCTCCTCCATGTCGACGCCGACGACGAGGCGCTGATCCAAATCCCCGAGATCGGAAGAGCG	7:A>T	0.31	0.33	60	10	142	212	2	0.43	0.05
100021497|F|0--59:C>G			TGCAGCTACGATCTTTGACATTTTTTGGCGTCCGATCGCTTGATCGAGACCTGGGCCACCTCCGAGATC	59:C>G	0.11	0.17	12	15	153	180	2	0.19	0.08
100004430|F|0--13:A>C			TGCAGCTACTCCTACTGCTTCCTTCCCCCCTGTCGCCGAGATCGGAAGAGCGGTTCAGCAGGAATGCCG	13:A>C	0.21	0.28	31	14	135	180	2	0.33	0.08
100042173|F|0--17:A>G	chr7R	118642343	TGCAGCTAGCAGCGGGGAACAGTTGCCGCCATGTAGTAGATCGCAACATGGTGGCCAAGACCTGCACAG	17:A>G	0.2	0.27	138	11	31	180	2	0.32	0.06
100015955|F|0--20:C>A	chr1R	94648181	TGCAGCTAGCCTCCGTCCACCGCTGCTGTTCTCTTCTTCTTGGGGTTCAGAAGTGGTTGCGGTTAACAT	20:C>A	0.18	0.25	149	17	26	192	2	0.29	0.09
100005498|F|0--43:C>T	chr2R	63784017	TGCAGCTAGCTTGAAACCAACTATTACATCATTTCTTAATCAGCTCATTTTGCGATTATTGTAGTAAGT	43:C>T	0.23	0.29	38	14	146	198	2	0.35	0.07
100028087|F|0--26:T>C	chr4R	43566523	TGCAGCTAGGACCTGACGGAATCATCTCATACCCGTCGATCGCTTTTCATGCATGCATCTCATGCGTGC	26:T>C	0.31	0.33	120	7	51	178	2	0.42	0.04
100013063|F|0--42:C>T	chr2R	673203192	TGCAGCTAGGCCAACTTCTGGTATGCAGCTTGTTTCATTAGTCGATTGATCCTACCCCACTTCTTATCA	42:C>T	0.48	0.37	97	13	104	214	2	0.5	0.06
100015684|F|0--22:G>A			TGCAGCTAGTGAGGCTTCATCTGACGCGGAGTACTCAGTGTACCTCTTCCTACCGAGATCGGAAGAGCG	22:G>A	0.07	0.12	179	12	7	198	2	0.12	0.06
100005023|F|0--18:C>T	chr5R	557392480	TGCAGCTAGTTTCTGAAGCTGGGTTCCTTTTGATTCAGGTTACCAGTTCTTCATGGACGAGGATGCGGA	18:C>T	0.1	0.16	10	18	170	198	2	0.17	0.09
100010619|F|0--17:A>G	chr3R	801549172	TGCAGCTATAGCTCGGGACGCTCTGCCTACCACGTGCTGCATGCATGCGCCCGCCTGCCATCGTCATGC	17:A>G	0.33	0.35	59	24	129	212	2	0.45	0.11
100067619|F|0--59:C>T	chr2R	804966638	TGCAGCTATCGCCTACTGCGTGGCGCTACTTCTACAAACGCCCAGGCCCGCAAGCCCCGCGGCTGCGCG	59:C>T	0.05	0.09	8	5	186	199	2	0.1	0.03
100008494|F|0--48:T>G	chr7R	846054186	TGCAGCTCAAAACACCCAGCAGTTACGGAGCTGGAGTGCCTTTCAGCATCTGCGAGGCCTGCGATGCTT	48:T>G	0.28	0.32	149	11	54	214	2	0.4	0.05
100007744|F|0--17:A>G	chr4R	499468393	TGCAGCTCAAATCCCTCAGCGGATTAAATTGGGCGCAGAAAGAGCAGTGCAAATTGCCGCTGGATGCAC	17:A>G	0.26	0.31	41	30	143	214	2	0.39	0.14
100075211|F|0--55:G>C	chr5R	634202855	TGCAGCTCAACGGCCTCTCCGTCGCCAAGGACGTCGGCAAGGCCTTCGGCCTGCTGGCCGAGATCGGAA	55:G>C	0.38	0.36	97	51	50	198	2	0.47	0.26
100027575|F|0--47:T>C			TGCAGCTCAGCTTGTGACGACTCGGGCCGATCGAGAGCCGCCTACACTGTTGCTCCGAGATCGGAAGAG	47:T>C	0.08	0.13	167	18	6	191	2	0.14	0.09
100002643|F|0--46:A>G	chr5R	541730923	TGCAGCTCATATACCATGTCGCCTCTTTCCCGCGTGACGTGCATCTATTTTGTGATGGATGGACGCCGC	46:A>G	0.16	0.24	27	16	171	214	2	0.27	0.07
100056739|F|0--31:C>G	chr7R	843126947	TGCAGCTCATCGACCTGTACTACGACTGGCCCCGCGGCCGCAACCTGAACCTCATCCACAACCAGCTCT	31:C>G	0.38	0.36	72	15	121	208	2	0.47	0.07
100057503|F|0--40:G>T	chr2R	934394189	TGCAGCTCATCGACGACATCCGTGCCAAGGTGCAAGCGGTGTGTGGCCCTGTGGTCTCTTGCGCCGACA	40:G>T	0.18	0.25	27	16	151	194	2	0.3	0.08
100014229|F|0--10:G>A	chr5R	729337747	TGCAGCTCCAGCTTTGCTGTCACACAGAGGACACAGGACACAGGGCGCACGGTTTCCGTGGGCTACAAC	10:G>A	0.42	0.37	114	19	81	214	2	0.49	0.09
100008038|F|0--46:A>C			TGCAGCTCCATCTTCATTGGCCACGTTCTTCCCCACGACCACTGCCACTAGGCCGAGATCGGAAGAGCG	46:A>C	0.12	0.19	14	18	162	194	2	0.21	0.09
100033642|F|0--34:C>G			TGCAGCTCCCCTACGGCATCGACTTCCCGCAGTCCAGGCCCACCGAGATCGGAAGAGCGGTTCAGCAGG	34:C>G	0.19	0.26	31	21	162	214	2	0.31	0.1
100084562|F|0--38:C>G	chr2R	788209633	TGCAGCTCCCGCAGCTCGACGCCGTCCACGGCCGCCTCCGCGAAGTCCACGCCGCGGCCGCTGCACAGC	38:C>G	0.36	0.36	71	10	129	210	2	0.46	0.05
100009200|F|0--65:A>G	chr1R	522841353	TGCAGCTCCCGCTTCTCCTTGCCATAGTCCTTCTTGTTCGTGAAGGCGATCTGTTTGTTCACCACACAT	65:A>G	0.08	0.13	4	24	181	209	2	0.14	0.11
100132342|F|0--43:C>T			TGCAGCTCCCGGCCGCGCCCGCCACGCGGTATGGGGGCAGCGGCACTGGCGCCGAGATCGGAAGAGCGG	43:C>T	0.35	0.35	125	13	65	203	2	0.46	0.06
100035802|F|0--50:T>A	chr7R	887015404	TGCAGCTCCCTCATGGCGCTGCTCAGCTCCTGCTGGAGCGACTGGATGCATCCCGCCATCTTCTGCTTC	50:T>A	0.26	0.31	127	7	43	177	2	0.39	0.04
100079824|F|0--15:T>C	chr4R	580633821	TGCAGCTCCCTGGATTGGCTTGCTCTGCGCGTGTAACTCGTGTTGACCTGTAGAACTTTTTCCTTTTTT	15:T>C	0.28	0.32	125	6	46	177	2	0.4	0.03
100022123|F|0--35:C>A			TGCAGCTCCGATGCTCGGTAGCAGGGAGAGGAATCCTGATTGCTCCGAGATCGGAAGAGCGGTTCAGCA	35:C>A	0.23	0.29	139	15	37	191	2	0.36	0.08
100051752|F|0--46:T>C	chr4R	139317627	TGCAGCTCCGCCGACTCCGCGAGCTGAGTCTGGAGCGGAGGGATTCTGAACACTCCTGAAGCCAACCGA	46:T>C	0.08	0.13	186	14	9	209	2	0.14	0.07
100055535|F|0--46:C>T	chr1R	639443601	TGCAGCTCCTCCCCAGCAATGTCGTGCGGCAGTTCTACGTCAACCTCAACGGCAAACCGTGGTACCCGA	46:C>T	0.46	0.37	106	18	88	212	2	0.5	0.08
100014242|F|0--31:T>C	chr2R	64112130	TGCAGCTCCTCGAAATTGACGCAGAATTCAATTACAGGGACAAAAACACGGCGTTGGCGTTGGCGACGC	31:T>C	0.07	0.12	190	18	5	213	2	0.12	0.08
100087638|F|0--17:C>G	chr2R	24004753	TGCAGCTCCTCGAGGTACACGCTGCTGGTGCCGTCGAGGAAGCTGTCCGTCATCCTGGACAGCGGCACC	17:C>G	0.06	0.11	10	2	172	184	2	0.11	0.01
100087638|F|0--59:C>G	chr2R	24004753	TGCAGCTCCTCGAGGTACACGCTGCTGGTGCCGTCGAGGAAGCTGTCCGTCATCCTGGACAGCGGCACC	59:C>G	0.1	0.16	12	15	177	204	2	0.17	0.07
100065767|F|0--64:T>A	chr5R	753947233	TGCAGCTCCTGCTCCCTCCACGCCCCCATCAATGCCGCCCTTCCACGGCCCACCACCCTGCGGCTGCGG	64:T>A	0.48	0.37	95	11	88	194	2	0.5	0.06
100012384|F|0--64:C>T	chr6R	645848786	TGCAGCTCCTGCTCTTTTCCTCCTTCATCCAGAAGCACCCGCCTGGGATTGAGATCCCATTCAACAAAG	64:C>T	0.45	0.37	91	16	74	181	2	0.5	0.09
100000322|F|0--37:C>G	chr7R	575336871	TGCAGCTCCTTGGATCTGACCTAGCTCTCGATCGATCCATCCATGCATCCATCTCCAATGCCAAACCGA	37:C>G	0.07	0.12	6	18	190	214	2	0.13	0.08
100092676|F|0--50:A>G	chr2R	216451405	TGCAGCTCGAAGAATCCGTGCTGGATGCCAGCAATCTTAAATGCCTCGGCAGCGTTAACTTTTGTGCCA	50:A>G	0.19	0.26	28	19	151	198	2	0.31	0.1
100038124|F|0--29:G>A	chr3R	677905931	TGCAGCTCGATGACCAGACCACTAAACCAGATATCGGCCGCCCATGAGTGAAATGGAGCATCAACATCT	29:G>A	0.49	0.37	98	17	95	210	2	0.5	0.08
100059901|F|0--33:T>G			TGCAGCTCGCCCGCATCGTCGGTCGGTCTTGTTTCCTCCGAGATCGGAAGAGCGGTTCAGCAGGAATGC	33:T>G	0.49	0.37	91	19	88	198	2	0.5	0.1
100014754|F|0--65:G>C	chr1R	653040996	TGCAGCTCGCCCTTCATCATGCCGCCGAACTCCAGCACGCTCCACGCCAGCATCGTCGAGCTGAAGGCC	65:G>C	0.43	0.37	84	17	113	214	2	0.49	0.08
100019563|F|0--19:G>C	chr6R	715609124	TGCAGCTCGCCGACGCGCTGCACGGCCGAGGCCTCGCCATCACCGTCCTCCACACCACCTTCAACGCCC	19:G>C	0.4	0.37	103	11	68	182	2	0.48	0.06
100059735|F|0--9:C>T	chr1R	689253156	TGCAGCTCGCCGACGGCAGCATGGGGGCCGTGGCGCCCTCGCCGTCAGTGCCTAGCTTCGTGACCAACC	9:C>T	0.06	0.11	11	5	195	211	2	0.12	0.02
100081005|F|0--13:G>C	chr2R	125659989	TGCAGCTCGCCGAGGTGCTCCACGGCCGCGGCCTCGCGGTCACCATCCTCCACACCACGTTCAACGCCC	13:G>C	0.16	0.23	27	12	170	209	2	0.27	0.06
100064915|F|0--29:C>G			TGCAGCTCGCCGTTGCGGAGGTCGTAGCCCTCGAGGGCCGAGATCGGAAGAGCGGTTCAGCAGGAATGC	29:C>G	0.28	0.32	54	13	147	214	2	0.41	0.06
100010267|F|0--17:C>T			TGCAGCTCGCCTCTGGTCTCCCACGTTTCCTTTCCCCGAGATCGGAAGAGCGGTTCAGCAGGAATGCCG	17:C>T	0.12	0.19	13	15	144	172	2	0.21	0.09
100063954|F|0--11:G>C			TGCAGCTCGCTGGCCACGGCCACCTACCTGCCCCCGCTCCTCGCCCCGAGATCGGAAGAGCGGTTCAGC	11:G>C	0.36	0.36	123	27	64	214	2	0.46	0.13
100037968|F|0--22:T>G			TGCAGCTCGGAGCAAGGTGCAGTCTTTCCTGGAGGCCGCGTGCTCCGAGATCGGAAGAGCGGTTCAGCA	22:T>G	0.08	0.14	189	15	10	214	2	0.15	0.07
100075609|F|0--32:A>G			TGCAGCTCGGTCATCGCCGCAGGGGACAGAATATCGGGCCGAGATCGGAAGAGCGGTTCAGCAGGAATG	32:A>G	0.3	0.33	51	8	122	181	2	0.42	0.04
100006786|F|0--10:T>C			TGCAGCTCGGTCCAGCCCTCACCACTACCTTCCCTCCCTCCGAGATCGGAAGAGCGGTTCAGCAGGAAT	10:T>C	0.09	0.15	169	14	11	194	2	0.17	0.07
100081607|F|0--51:T>C	chr5R	142635498	TGCAGCTCTCCTCTCTCGCACGCGCGCCCGTGCCAGGAGCGCCCCGTGCTCTGATGGGATCGCCGAGAT	51:T>C	0.44	0.37	81	27	106	214	2	0.49	0.13
100058938|F|0--15:G>A	chr4R	673688675	TGCAGCTCTGCGGCCGCCATGGGCTCCCTCCGCCGTCAATGCCGCCGCGCTACGCACCTTGGCTACGCC	15:G>A	0.06	0.11	168	14	4	186	2	0.11	0.08
100041242|F|0--61:A>G	chr5R	20778164	TGCAGCTCTGCGTCGGCCGCCGCTGCCTCGTCTTCCAGCTCCTCCACGCCGACTACTTCCCACAGGCGC	61:A>G	0.43	0.37	77	17	103	197	2	0.49	0.09
100052486|F|0--44:A>G	chr6R	611505396	TGCAGCTCTGCTCGTAAACACGCGCGTCTACTCGGTGCACGCACAGATCAACACGTGAGCGCTCGTGGC	44:A>G	0.49	0.37	76	21	81	178	2	0.5	0.12
100045878|F|0--67:G>C	chr7R	781796691	TGCAGCTCTGCTGCATCTCCCTCGGCCTTCTCCTGATGGCCGCCGTCTGCCCGCACGTCCCGCTGCTGA	67:G>C	0.16	0.24	174	10	30	214	2	0.27	0.05
100076453|F|0--51:A>C	chr2R	803913653	TGCAGCTCTTCTTCTCCTCCGCGTCGTGGTAGAAGGTGTACCAGTCGTTGGACCTGGCGCCCCACCGCT	51:A>C	0.15	0.22	25	15	174	214	2	0.26	0.07
100009816|F|0--65:C>T	chr5R	833455918	TGCAGCTCTTGCATCATGGCCGTTTGCTCAAAGATCTCCCTCTTCCTTAATGAAAAAAGGGCAGCCATA	65:C>T	0.07	0.12	7	12	176	195	2	0.12	0.06
100005061|F|0--32:A>T	chr7R	620368419	TGCAGCTCTTGCCACACCTCTCAAGTCCTAATAAATTCAGCAAGTTGCTACCAATTAAGTTAAGAGCAC	32:A>T	0.1	0.16	15	13	186	214	2	0.18	0.06
100068090|F|0--57:G>C	chr2R	19938558	TGCAGCTCTTGCGCTCCGTGGCCTCGTAGTAGTAGGTGTCCCAGTCGGCGTCCCTCTGCCCCTCCGTCT	57:G>C	0.24	0.3	38	13	133	184	2	0.37	0.07
100037105|F|0--38:C>T	chr1R	668844736	TGCAGCTCTTTCTTCGGCTGCGCGCCTATGTGTCGCGTCCTGCGGAACGTTCTATATGACGCATTCTGC	38:C>T	0.14	0.21	21	7	152	180	2	0.24	0.04
100084547|F|0--6:T>A	chr1R	655208759	TGCAGCTGAAACGGCCCTCTCCGACTGCCACCGACGTCCTCCAGCCTTGCTTTGGCAGCCTTGGTCAAG	6:T>A	0.4	0.36	101	15	65	181	2	0.48	0.08
100048076|F|0--40:G>T	chr1R	683470056	TGCAGCTGAATGAGGCGGTCAGAAGGGGTCCCTATCTTTCGGAGAAGAGGCAACGTGTGGAGGCACAGC	40:G>T	0.11	0.17	17	12	184	213	2	0.19	0.06
100002592|F|0--15:A>C			TGCAGCTGACGCTGAAAGTAGCCTACATTCACTACCCGAGATCGGAAGAGCGGTTCAGCAGGAATGCCG	15:A>C	0.28	0.32	51	18	145	214	2	0.4	0.08
100056879|F|0--51:C>G	chr3R	868443213	TGCAGCTGAGATGGCGCTGTCGAGCGCGCACCCAGGTCCCCTGAACTCGTGCCGGGAAGAGGGGGCAGC	51:C>G	0.41	0.37	73	5	108	186	2	0.48	0.03
100012322|F|0--34:G>T	chr5R	559538696	TGCAGCTGATGTCTTGTGAATTTTTTGTGTTGTTGTAGTTTTCGTTGAAATAGCCCTCATAATACTGTA	34:G>T	0.1	0.17	14	15	176	205	2	0.19	0.07
100002490|F|0--14:G>A	chr1R	324546740	TGCAGCTGATTCATGACACATTTGTATGTAATTGTTCATGTTCAATTGTTTTCTTACTCACCAGGTGAA	14:G>A	0.39	0.36	122	19	73	214	2	0.47	0.09
100015977|F|0--35:C>T	chr3R	836296346	TGCAGCTGCAAATGGGTGATATAATTGAACAAGGGCTAGAGGTCGAGCGCGGAGATTCCAGATTCCCGT	35:C>T	0.41	0.37	80	17	117	214	2	0.49	0.08
100037726|F|0--24:G>A			TGCAGCTGCAAGGGGAGGAAAGGGGACGGGGTTAGGAGGATGTGCCGAGATCGGAAGAGCGGTTCAGCA	24:G>A	0.12	0.19	172	32	9	213	2	0.21	0.15
100034901|F|0--42:A>G	chr2R	686058299	TGCAGCTGCACCTGCATGCCTCCCCCGTGGATTTCTTTACCTAAGGCGTGCCTGCAACCGCCCCAGTCC	42:A>G	0.24	0.3	156	14	44	214	2	0.36	0.07
100022801|F|0--17:T>C	chr1R	522128320	TGCAGCTGCACCTGCCGTTGGTCGAGGCCTCCAACGTGCTCACAAACTACCACGGCACCTCCAACCTCA	17:T>C	0.13	0.2	179	13	22	214	2	0.23	0.06
100002314|F|0--34:C>G			TGCAGCTGCACGATGCATCGGTGAACGATCTCCTCATACCGAGATCGGAAGAGCGGTTCAGCAGGAATG	34:C>G	0.12	0.19	13	21	161	195	2	0.21	0.11
100044422|F|0--59:C>G	chrUn	78542234	TGCAGCTGCACGTACAGCTCCCCGTCCGCGAACCGCTTGATCTTGATCCGCCCCAGCTCCAGCCCGAGG	59:C>G	0.49	0.37	95	10	98	203	2	0.5	0.05
100013953|F|0--60:T>A	chrUn	326562901	TGCAGCTGCACTGTAGATGTGCCACGTGCCGCATTTTCATTGGCTGAAAGGTGTTTGCTGTTGTGGCTA	60:T>A	0.14	0.21	139	35	8	182	2	0.24	0.19
100020563|F|0--56:C>T	chr2R	720184966	TGCAGCTGCACTTGCTTAGTTTGCCACGCAACACCTCCCAAAGAAGCAACGAAATACCAGTCTCCAGAT	56:C>T	0.29	0.33	48	11	126	185	2	0.41	0.06
100024120|F|0--24:A>G			TGCAGCTGCATACTCTGATAACTCATAAACTCCTCGGTAGAGGGAGAACCCGAGATCGGAAGAGCGGTT	24:A>G	0.06	0.11	6	10	165	181	2	0.11	0.06
100041811|F|0--19:A>G			TGCAGCTGCATTTACCTCTACCCTCGGAACTCAAACGTGCACAGAGGCCACCGAGATCGGAAGAGCGGT	19:A>G	0.4	0.36	77	16	121	214	2	0.48	0.07
100031877|F|0--52:T>C			TGCAGCTGCCATCCGCTCCAGTACTGCGCACCTGTGCCGCAGTTGGCATCTGTCGCCGAGATCGGAAGA	52:T>C	0.36	0.36	58	27	112	197	2	0.46	0.14
100042602|F|0--60:A>T	chr4R	674357927	TGCAGCTGCCATGGTTCTGCTCTTGATGGTGGCGACGGCGCAGGGCATCAGGCTGGACGCAGGGAGCAA	60:A>T	0.47	0.37	100	26	86	212	2	0.5	0.12
100053220|F|0--25:T>C	chr4R	121843035	TGCAGCTGCCCACTGGAGCTGGAGATGCTGGCTCCTAGCACCACCAGCAGCAGGGCCACGGCACCGCTG	25:T>C	0.4	0.36	65	13	101	179	2	0.48	0.07
100019495|F|0--19:C>T			TGCAGCTGCCGCATGTCGCCGACAGATGCTGCTGGTGCCGAGATCGGAAGAGCGGTTCAGCAGGAATGC	19:C>T	0.26	0.31	33	36	128	197	2	0.38	0.18
100019351|F|0--17:A>C			TGCAGCTGCGAGCCGTAAGCCGCCCGCCAGTCCTCCTCCGAGATCGGAAGAGCGGTTCAGCAGGAATGC	17:A>C	0.45	0.37	87	15	109	211	2	0.49	0.07
100029838|F|0--48:A>G	chr6R	38185375	TGCAGCTGCGCGCGGACAACGCCAAACACTCGATCAGAAAATGGGGGGAAAATCCTCAAAATCGCAAAA	48:A>G	0.27	0.31	44	17	137	198	2	0.39	0.09
100009930|F|0--13:C>A			TGCAGCTGCGCTCCCGATGTGGTGTTCGACGCCAACGTGATCCGAGATCGGAAGAGCGGTTCAGCAGGA	13:C>A	0.14	0.21	158	19	18	195	2	0.24	0.1
100019327|F|0--20:G>C	chr2R	779073227	TGCAGCTGCGGCGAGAGCTTGAGAGCCGTCATGGAGGACTCGGCGTCCTGGCCGTAGATCTGGTCGCCG	20:G>C	0.19	0.26	168	10	35	213	2	0.31	0.05
100030719|F|0--47:A>G	chr6R	756534581	TGCAGCTGCGGCGTCCAGTAGTACCCCTTGAGCGGCATCAGGTTGGGATGCCGTGCCTTGCCCAGCACG	47:A>G	0.27	0.31	148	6	52	206	2	0.39	0.03
100006238|F|0--62:T>G	chr5R	686888153	TGCAGCTGCGTCTTGGCCATGATCTCCGTCCTCCTCAGCTCCATCTCGCCCTTCTTCACCTCTGCCTCG	62:T>G	0.25	0.3	154	14	46	214	2	0.37	0.07
100076857|F|0--32:G>C			TGCAGCTGCGTGAACCCGCGCGGGTGGCCCGTGATCCGAGATCGGAAGAGCGGTTCAGCAGGAATGCCG	32:G>C	0.11	0.18	173	18	14	205	2	0.2	0.09
100081596|F|0--14:C>T			TGCAGCTGCTCCAACAGGCCGAGCCGGGACGGCGAGAAGACCGAGATCGGAAGAGCGGTTCAGCAGGAA	14:C>T	0.45	0.37	87	14	71	172	2	0.5	0.08
100005555|F|0--17:G>T			TGCAGCTGCTCGATGCCGTCGCCGTTCCACAGTATCCGAGATCGGAAGAGCGGTTCAGCAGGAATGCCG	17:G>T	0.14	0.21	26	7	181	214	2	0.24	0.03
100100027|F|0--21:A>G	chr4R	673108894	TGCAGCTGCTGCTAGATGACTAGTAGCAGGAGCCAAGAGGTGGTGGTGTAAGTGTGATGGTGCCTGATG	21:A>G	0.13	0.2	164	13	19	196	2	0.23	0.07
100068345|F|0--23:G>A			TGCAGCTGCTGGGCCCCGACGAGGAGAAGCCCTCGCCGAGATCGGAAGAGCGGTTCAGCAGGAATGCCG	23:G>A	0.07	0.12	180	10	8	198	2	0.12	0.05
100014060|F|0--6:T>C	chr7R	5148273	TGCAGCTGCTGGTGTCTGATTCAAACCCTTGTGGTGTTTTCAGGCGCCGATGAGCAGAGGCTGCTGGAA	6:T>C	0.12	0.19	152	12	15	179	2	0.21	0.07
100004699|F|0--13:T>C			TGCAGCTGCTTCGTGGACTTTTCCTGCGTCCAAGGGCCGAGATCGGAAGAGCGGTTCAGCAGGAATGCC	13:T>C	0.38	0.36	114	22	65	201	2	0.47	0.11
100092592|F|0--32:G>A	chr7R	842838816	TGCAGCTGCTTGGGCACGTCGAACACGGACACGTGAATGTCGACGTCTTCCTCGTCCTTCACGGTAAGG	32:G>A	0.34	0.35	68	136	1	205	2	0.45	0.66
100024850|F|0--26:A>G			TGCAGCTGGAAGTGCAGGATGAGGGTAATGCTTTCGCCATCCGATGCCGACCACATGGTACCGTTCATC	26:A>G	0.49	0.37	84	12	86	182	2	0.5	0.07
100009997|F|0--17:G>T	chr2R	172861447	TGCAGCTGGACTGGTACGTTTCACGTTTTGTTGACGAGCTAGTTCTACTCACTCCCAGGAAGCAGGAGG	17:G>T	0.42	0.37	77	26	110	213	2	0.49	0.12
100030464|F|0--41:A>G	chr7R	884710112	TGCAGCTGGATGCATGCCTGGATCGGCGACAGAGCCGTACAACACACTCCGTGTGCGACTTTCTGCCGA	41:A>G	0.44	0.37	109	19	84	212	2	0.49	0.09
100075187|F|0--47:C>G	chr5R	330085467	TGCAGCTGGCCGCGCACGACTGCTCGCACTCCGCCGCCGTCTTGTACCTCTCGAACGGCAGCTGCTCCT	47:C>G	0.4	0.37	75	22	117	214	2	0.48	0.1
100029409|F|0--67:G>A	chr2R	894709022	TGCAGCTGGCCGTGTACCTCTGCGCCGCCATGTCGCTCATGCTCTTCGCCGAGCGCCTCTACATGGGGC	67:G>A	0.06	0.1	197	4	10	211	2	0.11	0.02
100079800|F|0--53:C>T	chr3R	80787339	TGCAGCTGGCGAACTCGGCGATCCTGCCGATGGCGCTCAGGACTGCCATCGAGCTGGGCCTGCTCGAGA	53:C>T	0.18	0.26	24	31	159	214	2	0.3	0.14
100068343|F|0--37:T>C	chr6R	733479438	TGCAGCTGGCGTTCCAGAGCATCGGCGTGGTGTACGGTGACGTGGGGACGTCGCCGCTGTACGTGTACT	37:T>C	0.47	0.37	105	18	91	214	2	0.5	0.08
100004949|F|0--50:G>A	chr3R	677920475	TGCAGCTGGGACATGTTGAAGATAGCAGGAGGCATGGGGCCTGAGAGAAGGTTGCCTTCCAGGACCAGC	50:G>A	0.1	0.17	188	8	18	214	2	0.18	0.04
100111978|F|0--31:A>G	chr2R	889121297	TGCAGCTGGGAGAGGACCCGCAGATGGACGAACTGGAGACGGCGGGCGACGCCGATCAGGAAGCCAGCA	31:A>G	0.07	0.13	12	4	173	189	2	0.14	0.02
100037153|F|0--22:T>C	chr5R	34446073	TGCAGCTGGGCAAGATGAGCATTGCGTCGTGGGCCAGCAAGGAGGATCGCATCCGCACCTCGCCGAGAT	22:T>C	0.4	0.37	69	28	108	205	2	0.48	0.14
100015830|F|0--59:A>T	chr3R	194469251	TGCAGCTGGGCGAGGCGCGAGGCGATGATTTCATGGTACCTTGGCTCTGTTGAGGACATAACAGGCTCG	59:A>T	0.11	0.17	16	9	167	192	2	0.19	0.05
100015589|F|0--25:G>T	chr2R	572604068	TGCAGCTGGTCCTATGGCCATATAAGAGCCAGCCGAGACGAAGGCGAAACAGGGCACAATTAAAGCAAG	25:G>T	0.19	0.26	30	20	164	214	2	0.3	0.09
100045260|F|0--32:C>T	chr2R	121992812	TGCAGCTGTAACGCGGGATGCATGTACAAAACCAGGATAGTGTATGTGTGTGGTACAAGCCGCGTACAA	32:C>T	0.06	0.1	2	16	159	177	2	0.11	0.09
100085450|F|0--19:C>G	chr1R	664908126	TGCAGCTGTTCCGCGCGACCCAGAAGGACTACAGCGAGGCGGCGCGGTGGATCATCGGCCTCATGGCGA	19:C>G	0.39	0.36	75	9	120	204	2	0.48	0.04
100001792|F|0--11:C>A			TGCAGCTGTTGCTGTCAGTTAGTCACTCTCCTATTGACCGAGATCGGAAGAGCGGTTCAGCAGGAATGC	11:C>A	0.25	0.3	126	13	37	176	2	0.37	0.07
100047274|F|0--40:C>T			TGCAGCTTAGAGCATGCCCTAGGACGCGTAAAAATCGCCTCCTGAAGGCGAGCCGAGATCGGAAGAGCG	40:C>T	0.2	0.27	33	6	137	176	2	0.33	0.03
100001964|F|0--35:C>G			TGCAGCTTCACAAAGTACCGCAAGTCCTTCAAAGACTACATCCGAGATCGGAAGAGCGGTTCAGCAGGA	35:C>G	0.16	0.24	13	31	131	175	2	0.27	0.18
100009703|F|0--62:C>G	chr3R	674251789	TGCAGCTTCAGCCTCTCACTTTGATAAATTGCCATGCTATCAGCTCTCACTATGTCATATGACACCATG	62:C>G	0.47	0.37	81	22	94	197	2	0.5	0.11
100001353|F|0--31:G>A			TGCAGCTTCATGCGTGCACGGCAGTACATGCGTGTTGGCTGGCTCTGGAACCAAAGTCCGAGATCGGAA	31:G>A	0.08	0.13	180	11	10	201	2	0.14	0.05
100001353|F|0--43:T>A			TGCAGCTTCATGCGTGCACGGCAGTACATGCGTGTTGGCTGGCTCTGGAACCAAAGTCCGAGATCGGAA	43:T>A	0.12	0.19	180	10	21	211	2	0.22	0.05
100085444|F|0--40:T>C	chr1R	137037135	TGCAGCTTCCGCACCGCCACATCTCCTTCGCCGTTCCCCTTGGCTCCGTCGTCCTCCTCCTCCCCTCGC	40:T>C	0.14	0.22	15	31	166	212	2	0.25	0.15
100023477|F|0--40:C>A	chr5R	846929602	TGCAGCTTCCGCCTAACACCATCCCTCCCTCCTTGGCGCACCCTCTCGCCAGCAGCTTACTAATGGCGG	40:C>A	0.17	0.24	173	9	31	213	2	0.28	0.04
100040564|F|0--36:A>G			TGCAGCTTCGCCCATATGGCCTCGTGCTGCTCCAGCACATCCAGCGCAGCCCGAGATCGGAAGAGCGGT	36:A>G	0.32	0.34	50	11	114	175	2	0.43	0.06
100015235|F|0--25:G>C			TGCAGCTTCGGCATGTCGCTGCCAAGACTTGGTGGCATCTCCCCTGAAAAATTGTTGTTCCCGAGATCG	25:G>C	0.39	0.36	105	15	65	185	2	0.48	0.08
100003212|F|0--48:C>T	chr2R	898660557	TGCAGCTTCGGGCACCTCAAGAGCTTGGAGGCCAACAAAACTGGGCACCTGGATCCCCACCTCCCCATC	48:C>T	0.34	0.35	56	17	117	190	2	0.45	0.09
100030968|F|0--44:G>A			TGCAGCTTCGGGCGGTTGGATGGCAAAGCGTGCGGCCAGGCCAAGGCGTCCTTCAGAGCCGAGATCGGA	44:G>A	0.07	0.12	190	18	6	214	2	0.13	0.08
100026239|F|0--9:T>A	chr6R	698176482	TGCAGCTTCTATCTCGTGGTCTCCAATCCATGACTTTTATTTTTCCAGCTTCATCTCTTCAACGGCGTC	9:T>A	0.06	0.11	194	9	8	211	2	0.11	0.04
100052058|F|0--32:T>C	chr7R	761586880	TGCAGCTTCTCAGCGACGGTACAGTCGTGCGCTCTGCGGCCTTGCCCTTCCCTGTCGACGGCAACGTCG	32:T>C	0.37	0.36	120	11	68	199	2	0.47	0.06
100045955|F|0--68:G>C	chr3R	174822283	TGCAGCTTCTGCTGGACCATGGCGTTGTGGCGCTGCGCGAAGTCGTTGTAGGTCTTGAGGCAGCCGACG	68:G>C	0.32	0.34	54	28	132	214	2	0.43	0.13
100074366|F|0--50:G>C			TGCAGCTTCTTCCTCCTCTTCTTCCTTCTCCTCCTCCCTCCGCCGCCGCCGCCGAGATCGGAAGAGCGG	50:G>C	0.22	0.28	36	15	147	198	2	0.34	0.08
100000912|F|0--17:C>G			TGCAGCTTCTTGGATCTCATGGAGTCCATGTGCACGACCGAGATCGGAAGAGCGGTTCAGCAGGAATGC	17:C>G	0.06	0.1	10	4	196	210	2	0.11	0.02
100054285|F|0--36:T>C			TGCAGCTTCTTGTTACCGAGTCGAGCTCTCCACACATGGCGACACCTGTCCCGAGATCGGAAGAGCGGT	36:T>C	0.15	0.22	134	29	11	174	2	0.25	0.17
100072319|F|0--65:T>G	chr3R	11224377	TGCAGCTTGACAGGCTCTGGGATGAGGGGGATCTGCTGGAGTGGAGGAGCCTTGGCCTCCTGCTTTGGA	65:T>G	0.41	0.37	103	35	67	205	2	0.48	0.17
100021719|F|0--20:G>A	chr1R	674027408	TGCAGCTTGAGCGGGCAGACGGCCTCGATCTTGCACTTGGTGTAGCGCGCCGTGTAGCTCACCTTGCGG	20:G>A	0.19	0.26	169	10	35	214	2	0.3	0.05
100003141|F|0--8:G>C			TGCAGCTTGATGCAGGCCAGAGATAGCCAGCCAACGCCGAGATCGGAAGAGCGGTTCAGCAGGAATGCC	8:G>C	0.12	0.19	174	24	14	212	2	0.22	0.11
100046597|F|0--47:G>C	chr2R	886557337	TGCAGCTTGATTGTATGTTTGTTGTATCAGGGCGTCTCGTCTCTTTTGGCCACTTCGTGTGTTTCTTTC	47:G>C	0.06	0.1	197	7	9	213	2	0.11	0.03
100003410|F|0--35:G>A	chr4R	147573294	TGCAGCTTGCAAGTAGTGACAACATACGTGTATACGGCCTTGCTCTGTGTATCAGATGTATATTTGCTG	35:G>A	0.4	0.36	113	12	73	198	2	0.48	0.06
100005401|F|0--28:G>A			TGCAGCTTGCCCCCAGATTTCGTTTCCAGAACGAATCCACCGAGATCGGAAGAGCGGTTCAGCAGGAAT	28:G>A	0.31	0.33	130	22	51	203	2	0.42	0.11
100006894|F|0--20:G>A	chr4R	631154443	TGCAGCTTGCCGCATACGGTGGCATGGACCAGCTGCCTGCGTTAGTTAGTAGGAGTCGTTGCCATCCGT	20:G>A	0.11	0.18	143	27	6	176	2	0.2	0.15
100062615|F|0--32:C>G	chr2R	856993038	TGCAGCTTGGCGATGCGGCGCACGTACGGCTCCGAGCAAAACGCGATCATGGTCCTCTTCACGTCCTTG	32:C>G	0.11	0.17	170	12	15	197	2	0.19	0.06
100067840|F|0--32:C>G			TGCAGCTTGGCGCCGCCGCCGGCCACCTCCTTCACGTGCTCCGAGATCGGAAGAGCGGTTCAGCAGGAA	32:C>G	0.46	0.37	80	9	94	183	2	0.5	0.05
100056068|F|0--41:T>G			TGCAGCTTGGGGAGCAGGTAGTACCTGATCATCTCGTCCTCTGTCGGCATGAACCGAGATCGGAAGAGC	41:T>G	0.45	0.37	84	25	105	214	2	0.5	0.12
100065327|F|0--18:T>G			TGCAGCTTGGTCGACACGTCCGCCGCCGCCGCTCTGTGCTCGACGCCGAGATCGGAAGAGCGGTTCAGC	18:T>G	0.27	0.32	130	6	46	182	2	0.39	0.03
100021325|F|0--26:G>C			TGCAGCTTGTCAAGAACGGACAGGAGGACCTGCACATCGCCGCAAGAATTCCAGTCAGATCGAGTCACC	26:G>C	0.22	0.29	136	5	37	178	2	0.35	0.03
100028454|F|0--43:C>G			TGCAGCTTGTCGACCAAGGATACGAGGCCCTTCATGTGTTGCGCCGCAAGTCCTGCCCGAGATCGGAAG	43:C>G	0.23	0.29	39	21	152	212	2	0.36	0.1
100035050|F|0--28:A>G			TGCAGCTTTTCGTTTGAAAAGGCGTGAAACGGGTCAAGCAGATGAACCGAGATCGGAAGAGCGGTTCAG	28:A>G	0.44	0.37	88	22	67	177	2	0.49	0.12
100023881|F|0--28:C>A			TGCAGCTTTTGTGCGTCACGGCGTTGCACGCTAGCCGAGATCGGAAGAGCGGTTCAGCAGGAATGCCGA	28:C>A	0.12	0.19	158	14	15	187	2	0.21	0.07
100011552|F|0--67:G>C	chr7R	330657987	TGCAGCTTTTGTGTGAGCTACCGAACGAACGTCACGCTCCTGGGCGCATCACGCTCTTGAGATCTTCGT	67:G>C	0.33	0.34	137	13	64	214	2	0.44	0.06
100005466|F|0--35:G>C	chr1R	621565529	TGCAGGAAAAACTGCTGTGAGATTCAGAGACCCAAGAAAACGACACAAAGATCCTGCATCTGGTCTGCC	35:G>C	0.2	0.27	139	26	25	190	2	0.32	0.14
100000988|F|0--7:A>G			TGCAGGAAAAGATAGTGAAGCCGCACCTGAAGCACGACTACAATATGCTATGCAAGAAGCCGAGATCGG	7:A>G	0.32	0.34	53	28	126	207	2	0.44	0.14
100003958|F|0--45:C>T	chr5R	38659533	TGCAGGAAAGAAAAGGCTTTTTATGCTCTGTTATCAATACTGTTGCTCCTGCAAATCTAAACAGTCAAA	45:C>T	0.07	0.13	4	23	187	214	2	0.13	0.11
100007661|F|0--67:T>A	chr4R	3967984	TGCAGGAAATACTGATCCACCGTGCCCTAGATTCACCACGGCGGAGCAATGGTCAGGTCAGGTCAGCTA	67:T>A	0.07	0.11	192	16	6	214	2	0.12	0.07
100047362|F|0--13:T>C	chr2R	145009403	TGCAGGAAATGGCTGGTGAGAATGCAGATATTCAAAGTTTCTGTTTGGAAACATGGCTGTTTTGGCAGA	13:T>C	0.24	0.3	149	17	41	207	2	0.36	0.08
100007853|F|0--11:T>A			TGCAGGAAATTTGGTGCAGCAGTCGGTCAGTTAGGAGGCGCCGAGATCGGAAGAGCGGTTCAGCAGGAA	11:T>A	0.11	0.17	169	8	17	194	2	0.19	0.04
100087561|F|0--6:A>T			TGCAGGAACACCTTCTGGCTGACGCTCTGGTACGGCCGCGTCCGAGATCGGAAGAGCGGTTCAGCAGGA	6:A>T	0.33	0.35	111	26	49	186	2	0.44	0.14
100031350|F|0--16:T>A	chr4R	883956635	TGCAGGAACAGCGGCATTTCTTGATTGATGCGGAGATGATCTCGTCGTGCCCCATCTGCGGCCACCAAG	16:T>A	0.5	0.37	93	20	91	204	2	0.5	0.1
100011659|F|0--37:G>A	chr2R	590581792	TGCAGGAACAGGGCAGCCATCGGTTACACGAATCGGCGCCGAAAATGGACACGGGCAATGGACCGATCC	37:G>A	0.4	0.36	110	36	67	213	2	0.48	0.17
100067594|F|0--59:G>A	chr7R	680149860	TGCAGGAACAGGGCCGCCGCGGAGGCCTCCTCCGCCGCGGCGCCGAGGAGGCCGTACTTGTCCGAGGCG	59:G>A	0.14	0.22	165	7	25	197	2	0.25	0.04
100067349|F|0--35:C>G			TGCAGGAACATCTCCACCACCGCCTTCTGGTTGTGCGAGTGGTTCCCGCCGCCGCCGAGATCGGAAGAG	35:C>G	0.45	0.37	75	14	93	182	2	0.5	0.08
100007238|F|0--8:C>T	chr1R	675428062	TGCAGGAACCATCCCCGTCTCCAACCAATCGAGTATGGACAAGCTGCTGGCCTTCTCCATCCTGAGCGC	8:C>T	0.08	0.13	9	9	159	177	2	0.14	0.05
100029835|F|0--64:T>A	chr7R	775196691	TGCAGGAACCGCAAATCGAGAAAGACGCGCGTCTCGTGCTTCAGCCTGGATAGAAATTAAGGCCTATGG	64:T>A	0.13	0.2	154	4	21	179	2	0.22	0.02
100052364|F|0--25:G>A			TGCAGGAACGGCCGGCATCGCTTTCGCCTAGAGCTTCATAGCCGAGATCGGAAGAGCGGTTCAGCAGGA	25:G>A	0.48	0.37	94	8	85	187	2	0.5	0.04
100090239|F|0--33:A>G	chr2R	669408963	TGCAGGAACTGCCGCTGCCGCTGCCGCCATCACAGACCGTCTGACGGTGCAGTTCGGCGATGCCGCAGT	33:A>G	0.19	0.26	154	12	31	197	2	0.31	0.06
100026777|F|0--12:G>A	chr4R	676633997	TGCAGGAAGAGGGAGGCGTCCCTGTGCAGCGGCCACAAGACACTAAAGCACCTTGTCCCCGACGACCAG	12:G>A	0.35	0.35	119	20	58	197	2	0.45	0.1
100006589|F|0--47:C>G	chr4R	700950825	TGCAGGAAGCGGTCGAACCAGTCGCTTGCTTCCTTCACCATGTTCGCCGTCAACAGATGTTCAACTCCC	47:C>G	0.48	0.37	66	70	60	196	2	0.5	0.36
100024497|F|0--43:T>G	chr7R	872347894	TGCAGGAAGCTCAACGCCCTGCCTGTCCTCGGCGAGCTCCCCTTCCTGGAGCTTCTGGATGTCAAGGAG	43:T>G	0.42	0.37	103	8	73	184	2	0.49	0.04
100046755|F|0--68:G>C	chr5R	779580096	TGCAGGAAGCTCGTCGAGGTAAGCCGCGCACGCCCTCCCTCCTCCCACCAGCCGCGGCTAAGGCATTTG	68:G>C	0.28	0.32	133	6	49	188	2	0.4	0.03
100056283|F|0--33:C>G			TGCAGGAAGGGACCGACAAGTCGTCGTTTTACCCACCCCGCCGAGATCGGAAGAGCGGTTCAGCAGGAA	33:C>G	0.2	0.26	34	14	162	210	2	0.31	0.07
100006742|F|0--55:G>T	chr4R	780631656	TGCAGGAAGGTTCCAACTCCTCAACTGTGGTTTGCTCTAAGTGAAGCCTGAGAAAGTCAGATTGATAGT	55:G>T	0.15	0.22	27	6	164	197	2	0.26	0.03
100009082|F|0--36:G>C			TGCAGGAAGTTCCAGGCTCCGCACCATGGCGACTTCGCCGAGATCGGAAGAGCGGTTCAGCAGGAATGC	36:G>C	0.44	0.37	102	17	77	196	2	0.49	0.09
100002251|F|0--20:C>T	chr4R	20173171	TGCAGGAAGTTGGTTCTTGCCTGACACTGGACAAGTTTGAGAAGATGGTGCGACCATTTGCCATGCCCC	20:C>T	0.14	0.21	18	24	172	214	2	0.24	0.11
100004819|F|0--8:T>C			TGCAGGAATAGCTTGGGCATGACGGCCATGCCCAGCCGAGATCGGAAGAGCGGTTCAGCAGGAATGCCG	8:T>C	0.09	0.15	188	15	11	214	2	0.16	0.07
100013123|F|0--52:G>A	chr1R	726000840	TGCAGGACACAACATAGCGAAATCATCTTCAGAATCAACACAACACATCTTTGCCTCGCCGTCCGTGGA	52:G>A	0.25	0.3	145	10	45	200	2	0.38	0.05
100041886|F|0--7:C>T			TGCAGGACATCGACGACTGGCTGCCCGTCACCTCCTCCCGAGATCGGAAGAGCGGTTCAGCAGGAATGC	7:C>T	0.18	0.25	26	23	165	214	2	0.29	0.11
100007018|F|0--19:T>C			TGCAGGACATCGTACACCGTATACATTCCCTCTTGCCGAGATCGGAAGAGCGGTTCAGCAGGAATGCCG	19:T>C	0.11	0.18	157	14	14	185	2	0.2	0.08
100010907|F|0--22:G>A	chr2R	829459236	TGCAGGACCAATTCAATTCTGCGCACGAAGTCCAAGCGATCCATCTGCCGCTTCAGGTTTCAGCAACTC	22:G>A	0.22	0.29	139	19	33	191	2	0.35	0.1
100075160|F|0--16:G>C	chr1R	497762224	TGCAGGACCCCACGGGGGCCCTCGCCGACTGGAACGCCTCCGATGCCGACCCCTGCTCCTGGAACGGCG	16:G>C	0.19	0.26	152	15	31	198	2	0.31	0.08
100035358|F|0--23:G>T	chr2R	684845472	TGCAGGACCCTCCCTCTGACTTAGATGATGCCGATCTTGTTGGCCACGTCAAGAGCATCGTAGTCTGGT	23:G>T	0.49	0.37	97	13	103	213	2	0.5	0.06
100055029|F|0--25:A>C	chr6R	261110100	TGCAGGACCGAAGTGCTGAACGAGCAACCAGTCCACCACCCCCTTCCAGCAGGACGGCGCAGCGGATGC	25:A>C	0.24	0.3	154	15	44	213	2	0.37	0.07
100063540|F|0--49:T>A			TGCAGGACCTTGAAGCCGAGGTCGTCGTCGAAGCTGGTGGCGTACTGCATCCCGAGATCGGAAGAGCGG	49:T>A	0.07	0.11	195	10	9	214	2	0.12	0.05
100018270|F|0--33:G>A	chr5R	622697736	TGCAGGACGAGATAAATCGAGTCACCGAAGGCAGACCGACCATCGAGGAAGACGAGCTGAGCAGGATGG	33:G>A	0.11	0.18	180	21	13	214	2	0.2	0.1
100061701|F|0--10:C>G	chrUn	255635262	TGCAGGACGCCAGACCACAGGCTGCTACAACGGTATTGCACTGCAACTGGCCGTTTTTTTTCCTTACTT	10:C>G	0.49	0.37	69	51	71	191	2	0.5	0.27
100055917|F|0--23:C>G	chr1R	660237669	TGCAGGACGGCTCCGCCGCCACGCCTTCGGGAAGATCAGATTGGCAGCTCAATACGTCGATCCAGCCGT	23:C>G	0.47	0.37	91	19	104	214	2	0.5	0.09
100057014|F|0--18:C>G			TGCAGGACGTGGCCGTGGCCGGCACCACCAGCAGCAAGGACGTGCTGGCCAAGCCGAGATCGGAAGAGC	18:C>G	0.48	0.37	96	30	86	212	2	0.5	0.14
100004070|F|0--20:G>T			TGCAGGACTTCCAGGGCATGGTGGTGCTCATGGAGCAGGCCGAGATCGGAAGAGCGGTTCAGCAGGAAT	20:G>T	0.13	0.2	20	15	176	211	2	0.23	0.07
100045872|F|0--28:T>A			TGCAGGACTTGCATTGCCTGGGCGACAGTCGGCCGCTCGCTCCGAGATCGGAAGAGCGGTTCAGCAGGA	28:T>A	0.45	0.37	106	23	84	213	2	0.49	0.11
100001177|F|0--11:A>G	chr4R	33447439	TGCAGGAGAACAAAATTGAATTTCATCATCCTAGACAGAACCAAAATTAACCACTCTGCTAGAGTTGCT	11:A>G	0.21	0.28	4	80	122	206	2	0.34	0.39
100045871|F|0--45:C>G	chr1R	516503808	TGCAGGAGAAGACCGCCAAGAAGGCGGCGCAGGCCACGCAGGGGGCCGACGACGCCAAGAAGAAGAACG	45:C>G	0.11	0.18	15	17	182	214	2	0.2	0.08
100021435|F|0--53:G>C	chr4R	786178951	TGCAGGAGAAGCATACCATACCTGTCTGCCTGGGCGTATGCATGTTTGCATGGGAGCAGAGAAACTTGC	53:G>C	0.27	0.32	127	7	45	179	2	0.4	0.04
100080956|F|0--16:G>C	chr4R	883947796	TGCAGGAGACAACCAGGACCACTTGCACGGCGGAGACTGCCACTTGAGCCCCTTCAAGGTGGTCTTGGT	16:G>C	0.09	0.15	183	13	13	209	2	0.17	0.06
100044939|F|0--44:T>A	chr7R	760754163	TGCAGGAGACTAGAAACTGAGCAGCGGCGCGACAAACACTTGCATCCGAACCGAATTTGGTTTTCGCGC	44:T>A	0.47	0.37	99	11	87	197	2	0.5	0.06
100028569|F|0--24:C>T	chr6R	590798673	TGCAGGAGAGAGCGATAATTCGTACGGATCCAGAAACCAACCAAGACAAGAAAGAAAGGCCGCCTCGCG	24:C>T	0.17	0.24	22	18	140	180	2	0.29	0.1
100095607|F|0--49:T>C	chr6R	754007765	TGCAGGAGAGGATCAGGGAGAGGGTGAACGTGAGGGAAGGCACCTCCTATATGAGGTCGGCCGTGCGGC	49:T>C	0.09	0.15	172	17	9	198	2	0.16	0.09
100006301|F|0--30:C>G	chrUn	212556802	TGCAGGAGAGTAGGGTCGGCACAACGCCCACCCCAGGAACCCAGGCATCATTTGCGCGCACCGAACGGG	30:C>G	0.11	0.17	12	22	179	213	2	0.19	0.1
100051844|F|0--27:T>C			TGCAGGAGATCATCGACGAGAGGAAGGTTGCCCGCGTCGAGAAGATCAAGGCCGAGATCGGAAGAGCGG	27:T>C	0.41	0.37	42	76	78	196	2	0.48	0.39
100016536|F|0--32:A>T	chr4R	510055519	TGCAGGAGATTCCGTTCCAAAATGCAGATATTATTTATTCCATCGTTTTATGTAGCAAACTGACTATTG	32:A>T	0.14	0.22	21	15	162	198	2	0.25	0.08
100061186|F|0--17:G>A			TGCAGGAGCACAAATCGGAATCGGGTGAGCAAAAGGAGGCGCGGCGCCGAGATCGGAAGAGCGGTTCAG	17:G>A	0.07	0.12	174	20	4	198	2	0.13	0.1
100008524|F|0--24:A>G			TGCAGGAGCACGACGCCAACAGCAACGCCTTCTCGGCCACCAAGCTGTCCATCTCCATCCCGAGATCGG	24:A>G	0.17	0.25	28	18	168	214	2	0.29	0.08
100011876|F|0--40:G>C			TGCAGGAGCACTCCAGCTTCATGGCGCCGCCCCCCTCGGAGAGCTCCACCATGCAGATCCGAGATCGGA	40:G>C	0.09	0.16	178	1	18	197	2	0.17	0.01
100003438|F|0--41:C>T	chr5R	836904220	TGCAGGAGCAGCAGCAAACCCTGTGTAGCTCAGGGCTTCGCCGTCAGTCACTATCATCAGGCCCGAGAT	41:C>T	0.06	0.1	4	14	174	192	2	0.11	0.07
100023530|F|0--20:T>C			TGCAGGAGCAGGACCGTCTCTAATTAATAAAAGGTCACGCTGCCACGCCGAGATCGGAAGAGCGGTTCA	20:T>C	0.2	0.27	162	17	35	214	2	0.32	0.08
100011844|F|0--38:A>C			TGCAGGAGCAGGCACAAACTGTGGAGGCTGTGGACCAGATCCGAGATCGGAAGAGCGGTTCAGCAGGAA	38:A>C	0.47	0.37	85	30	99	214	2	0.5	0.14
100024752|F|0--25:G>A			TGCAGGAGCGATGGATGATGGAGATGGAATCCGCCGCATGCTTTTGTCGTTGTGGAACATAAACGGCTC	25:G>A	0.12	0.19	149	12	15	176	2	0.21	0.07
100061184|F|0--66:G>T	chr7R	788995445	TGCAGGAGCTATGGTCGAGTTTAGTGTCGTCGCGAGCCGCGCGCAGCGCCAGCGGCGAGGATGACGGCC	66:G>T	0.09	0.16	11	15	169	195	2	0.17	0.08
100019995|F|0--48:G>T	chr5R	193080090	TGCAGGAGCTGGAGCGAGTTTTGAAAACAATTCCATGTTTCTAAAAATGTCAAGACATCCCATGAATTT	48:G>T	0.48	0.37	86	17	93	196	2	0.5	0.09
100044496|F|0--36:T>C	chr2R	772245098	TGCAGGAGCTGGAGGAATGCTTCATGCGCCCCAGGCTGCCGCCGCCGCACATGTCCGCCGACATGTACG	36:T>C	0.49	0.37	92	15	98	205	2	0.5	0.07
100003873|F|0--27:C>G	chr1R	697172852	TGCAGGAGCTTCAGAAGAGATAGATACCGAGGTCAACAGGTGAGCTTTCGAGGAAGCTGAATTTTCTGG	27:C>G	0.39	0.36	72	20	117	209	2	0.48	0.1
100015159|F|0--44:G>C	chr6R	618006124	TGCAGGAGGAAAGTCAACAGTATATCATCGTGTACGCACGCAGAGATGACGATATAGACGCATGCATGC	44:G>C	0.47	0.37	105	16	93	214	2	0.5	0.07
100009753|F|0--11:T>G			TGCAGGAGGAATAGTGCAAAGGTATCCTCACCTCGGCATGCTCCCGAGATCGGAAGAGCGGTTCAGCAG	11:T>G	0.45	0.37	92	19	74	185	2	0.5	0.1
100030069|F|0--14:A>G	chr6R	103640001	TGCAGGAGGCGACTATCCGATCACAATGCTCGGCGCCGGAAGCCACAGCCAGACGCATTCTCCTTTGCA	14:A>G	0.39	0.36	109	5	68	182	2	0.47	0.03
100068836|F|0--29:A>G	chr3R	722559592	TGCAGGAGGGGCCCTGTGGAGCTACAGTGACATGTTGCATCGACACAAGGACGGACGCAGGTAGGCAAA	29:A>G	0.45	0.37	78	18	99	195	2	0.49	0.09
100063727|F|0--22:C>G			TGCAGGAGGTCGTACACCGGAGCCGACAGTGACATTCTTCCTCGCGGGATCCGAGATCGGAAGAGCGGT	22:C>G	0.38	0.36	115	5	68	188	2	0.47	0.03
100008819|F|0--13:T>G			TGCAGGAGGTTCCTCGCGACCTCCAAGGAGATCACCCCGAGATCGGAAGAGCGGTTCAGCAGGAATGCC	13:T>G	0.12	0.19	150	15	14	179	2	0.21	0.08
100071327|F|0--35:G>C	chr5R	830875208	TGCAGGAGTAGAACACATGCAACCTATGGATGGTCGTGATGTCCTATGCATGCATGCATCAACGGTGGA	35:G>C	0.12	0.18	172	13	17	202	2	0.21	0.06
100026432|F|0--65:C>G	chr2R	197732428	TGCAGGAGTCTCGTGGTGGGTCGTGTGAGGAAGAATCGCATGCCTTCAGTCAAGGAAGCAGTGGGCAAG	65:C>G	0.06	0.1	4	16	194	214	2	0.11	0.07
100029363|F|0--63:T>G	chr5R	697990398	TGCAGGAGTGAAGATTAACCTCACCTTCGGAGGTTAATGGACAACTAACAACCCAGGGAAGTATTAAAA	63:T>G	0.25	0.3	130	2	42	174	2	0.37	0.01
100006311|F|0--52:G>C	chr4R	791099283	TGCAGGAGTGAGGAGATGCGAGCAATAGTCTGAAGGTCATCCCCTAAGCATAGCTCGATAGGATTTTTT	52:G>C	0.27	0.32	122	13	42	177	2	0.4	0.07
100038252|F|0--42:C>T	chr1R	581384773	TGCAGGATAATCACCCCACCTCGTGCTTCATGAGTCAGTGGCCCGTAGTTCATTTCACCTACCATCACT	42:C>T	0.06	0.1	10	1	177	188	2	0.11	0.01
100011465|F|0--16:A>G	chr6R	428465772	TGCAGGATAATTCCTCAACACCGACTAGCTTGTCGCCAACGGATTTGTCCCGTGCTCCAGGCCAAGTGC	16:A>G	0.11	0.17	12	19	168	199	2	0.19	0.1
100017886|F|0--29:T>G	chr2R	690565580	TGCAGGATACTGGTAGAAATCTATTTTGGTTTGCCTTCGTTTTCAGAGAAATGGACACTACGACAATCC	29:T>G	0.41	0.37	112	9	77	198	2	0.48	0.05
100030145|F|0--49:G>A	chr2R	19771929	TGCAGGATCACCTCATTAGCGGCCATGATCCGCTTGAGGCAGAGCGTCTGTAGCGACGCCGAGAAGACG	49:G>A	0.38	0.36	65	29	118	212	2	0.47	0.14
100016106|F|0--53:C>A	chr5R	623234367	TGCAGGATCATCCACAGCAGCAGCGCCCTCCTCATTCGACTGCAACCCAGCGCCCGCGCCCTCCTCGGG	53:C>A	0.13	0.2	176	16	20	212	2	0.23	0.08
100040905|F|0--17:C>G	chr5R	561892778	TGCAGGATCCCCGTGGCCACGGGCATCATCATGACGGTGCAGGGCGTGTTGTGGATCCACATGCTGATG	17:C>G	0.36	0.36	43	57	96	196	2	0.46	0.29
100012802|F|0--15:T>C	chr1R	404768306	TGCAGGATCGATCACTAAAACACCAAAATCTTGGCTGTAAAACGGGAGAAAAAGAAACACAGCCGAGAT	15:T>C	0.16	0.23	152	33	16	201	2	0.27	0.16
100047990|F|0--11:T>C	chr5R	550628629	TGCAGGATCGGTGCAGAAGCGTCACGCCGTGTTCTTCCCTTTCCCGGCGCAGGGCCACGTCAAGCCGAG	11:T>C	0.07	0.12	177	10	8	195	2	0.12	0.05
100004548|F|0--29:C>T			TGCAGGATCTATATGTATGCACATGAATCCTGGTACTGGTAGTGCACCCGAGATCGGAAGAGCGGTTCA	29:C>T	0.49	0.37	87	20	84	191	2	0.5	0.1
100062785|F|0--35:C>G	chr5R	823076312	TGCAGGATCTCCACCTGCGGGTACTTCTCCCTGAACCCTTCGATGAGCTCCTTGCTGAGCGGCGCGCCG	35:C>G	0.31	0.34	53	21	131	205	2	0.43	0.1
100002473|F|0--35:T>C			TGCAGGATCTCCTCTAGACCTGTCTCTCACTATGGTACCCGAGATCGGAAGAGCGGTTCAGCAGGAATG	35:T>C	0.13	0.2	148	32	9	189	2	0.23	0.17
100001381|F|0--16:G>C			TGCAGGATCTCGTTAGGACCAAATTGGATCATCGTGCTCCCCACGATTGTGCTGCCGAGATCGGAAGAG	16:G>C	0.06	0.11	177	20	2	199	2	0.11	0.1
100006067|F|0--10:G>C	chr5R	516321899	TGCAGGATCTGGGCCTCCAGTTCACCCCTGTCAACGACTCTCTCTACGAGACGGTGAGGAGCCTCCAGG	10:G>C	0.27	0.31	152	10	52	214	2	0.39	0.05
100038541|F|0--26:C>T	chr5R	3964836	TGCAGGATGAACCACAGCGACCAGCACGCCGAGAAGCCAAGCAACGCAGCCGAGCCCACCGCCCACCTC	26:C>T	0.16	0.23	25	13	159	197	2	0.27	0.07
100035356|F|0--8:G>A			TGCAGGATGACGATGAGCTTGCTGGCCGACGTGGAGTCCAGCCCGAGATCGGAAGAGCGGTTCAGCAGG	8:G>A	0.21	0.28	140	24	29	193	2	0.33	0.12
100036237|F|0--25:A>G	chr5R	500034214	TGCAGGATGAGAACAACTCATGCCCAATCTGCCGGCACGAGCTGAGGACGGACGACCATGCGTACGAGA	25:A>G	0.09	0.15	11	9	154	174	2	0.16	0.05
100023242|F|0--55:C>A	chr5R	541394994	TGCAGGATGAGGTTAGGCCACTCACTGACAGCACGCTGCATGCCTGCCGCGGGGGCCTATCGCTTTTCG	55:C>A	0.24	0.3	130	9	38	177	2	0.36	0.05
100007509|F|0--59:C>G	chr6R	796709303	TGCAGGATGCACTCGACAAGCAGTCAATACTTTGAATTGATCTACTAGCAGTACCCGTCCAGTGATCAA	59:C>G	0.08	0.13	11	6	169	186	2	0.14	0.03
100044715|F|0--32:T>C			TGCAGGATGCATCCCGCGATCTCGCTAGCCGCTTGCGTTTCCGAGATCGGAAGAGCGGTTCAGCAGGAA	32:T>C	0.08	0.14	151	18	5	174	2	0.15	0.1
100037596|F|0--25:C>A	chr3R	833446278	TGCAGGATGCCGTGCCTGCCGCCAACCATCGGTTATATTCAAATCCCTCTTACCACATGGCGGCAGAGT	25:C>A	0.24	0.3	129	5	38	172	2	0.36	0.03
100069867|F|0--53:G>C	chr1R	428622528	TGCAGGATGGTCGCCGCCCACGTCCACTGCGACACGATCACGCTGGCGATCAGGCCCGTCTTCACGCTC	53:G>C	0.2	0.27	158	24	31	213	2	0.32	0.11
100053099|F|0--35:C>G	chr5R	527762718	TGCAGGATGTCGCGGGCGCCAGACGCGGACGAGGCCACGATGGCAGTGGTCGTACCGAGCTTCAAGGAC	35:C>G	0.12	0.19	25	2	187	214	2	0.21	0.01
100003392|F|0--20:C>A	chr4R	742642060	TGCAGGATTAGATGATGAGGCGCCAACAGGTCTCCAGCTTCATGCCCTGCTCTGTCCCAAAGCTCGCAG	20:C>A	0.26	0.31	118	62	20	200	2	0.38	0.31
100024845|F|0--6:A>G	chr3R	208081776	TGCAGGATTTGAAGAAGATGTTCTTACCAACTGTTGCGGAGGGCCTGGGACACTCATCTGCGGCGACGA	6:A>G	0.43	0.37	98	23	72	193	2	0.49	0.12
100002191|F|0--59:A>G			TGCAGGATTTGTTTTGTTGATTTGGTCTAATGCTTATTCGAGAACCATTCATAAATACAAAGACTATTA	59:A>G	0.12	0.19	11	23	157	191	2	0.21	0.12
100001740|F|0--26:T>G			TGCAGGCAAGATAGCACTGCATTTGTTTATCTTGCCAATCATTTCTGCAAGTAGGCCGAGATCGGAAGA	26:T>G	0.32	0.34	134	21	59	214	2	0.44	0.1
100028266|F|0--12:C>T	chr7R	745746912	TGCAGGCAAGCCCTTTCCGTCGCTCTTGATGGATAGCAGCAGGAGGAGGGCCTTCTTCAATCTCGCAGG	12:C>T	0.45	0.37	101	25	81	207	2	0.5	0.12
100020561|F|0--25:G>T	chr2R	605101987	TGCAGGCACAGAAAGAGGCTGGTCTGCAAGAAAATACTCGTAGCACGCACGATGTGATAACGCGCATGA	25:G>T	0.21	0.27	31	26	157	214	2	0.33	0.12
100058909|F|0--9:A>G			TGCAGGCACAGCGAGGCAAACACATGTGAGCTACCGCCCGCTGAGCGCCCACGGCGCCGAGATCGGAAG	9:A>G	0.26	0.31	149	17	48	214	2	0.39	0.08
100043420|F|0--17:A>G	chr5R	555518544	TGCAGGCACATATACCTATCGGACCTGATGCGCTTCATGAGGCAGGAGGAGGCCCTCAAGGCCATGGAC	17:A>G	0.45	0.37	93	9	75	177	2	0.49	0.05
100001461|F|0--35:T>A	chr2R	67396103	TGCAGGCACCTGGCCTATATGGATCACGAGAGGGGTCTGATCTGCCTGCGTGATGTCTGAATGCCCGAG	35:T>A	0.25	0.31	156	8	50	214	2	0.38	0.04
100054908|F|0--12:C>G			TGCAGGCACGCACGACCACGATCGACTAAAGGCCCGCCGAGATCGGAAGAGCGGTTCAGCAGGAATGCC	12:C>G	0.07	0.12	9	6	163	178	2	0.13	0.03
100039223|F|0--38:C>G			TGCAGGCAGAACCTGGCCCTCAGCATGGGCCGCATGTACCGCACCGAGATCGGAAGAGCGGTTCAGCAG	38:C>G	0.45	0.37	84	25	105	214	2	0.5	0.12
100007290|F|0--17:T>G	chr5R	673626007	TGCAGGCAGATCCACATTTCCCATCAGAACAGGGCATACAGAATGTGAAATATTCCATGAAAAATGCAA	17:T>G	0.09	0.15	161	6	13	180	2	0.16	0.03
100022346|F|0--14:C>A	chr3R	775022104	TGCAGGCAGCAACCCACAACGCGATCATCTCTCTCCCCATCGCTTCGTTCGCACCTAGCTTCTCTCCCT	14:C>A	0.22	0.28	154	18	36	208	2	0.34	0.09
100075554|F|0--41:T>C	chrUn	360203719	TGCAGGCAGCACGCCTCCATCACGCCGCCGAGCGACCCCGCTGCCGCCTTGACGTAGGGCGGGATCGGC	41:T>C	0.38	0.36	57	21	102	180	2	0.47	0.12
100054639|F|0--7:A>G			TGCAGGCAGCGTTCTGCAACGCGCTGGAGGAGGCGATCAACACGTTCGTCGACCCGCCGAGATCGGAAG	7:A>G	0.39	0.36	65	39	110	214	2	0.48	0.18
100032564|F|0--9:C>T			TGCAGGCAGCTCCCCAATTCGCGCGCCGCAGATTCCGAGATCGGAAGAGCGGTTCAGCAGGAATGCCGA	9:C>T	0.15	0.22	19	25	167	211	2	0.25	0.12
100015786|F|0--50:G>T	chr2R	708297387	TGCAGGCAGGCAGTGGCATTGCAGGGCCGCGTGGCCACCCTGTCTGTGGCGACGGAAGAATGGAGCTTT	50:G>T	0.4	0.36	71	26	114	211	2	0.48	0.12
100007087|F|0--17:C>T			TGCAGGCAGTTCAGGTACGGCTGTATCCTTCTCGTTTCAGGACATTCCCCATCGCCGAGATCGGAAGAG	17:C>T	0.06	0.1	4	12	156	172	2	0.11	0.07
100039983|F|0--28:A>C	chr2R	724408837	TGCAGGCATCGTTGAATATGTGTGGCGAAGGATTCGCAGATGTGGAAGTCCATGCATGCGTACTGGTCC	28:A>C	0.32	0.34	55	14	123	192	2	0.44	0.07
100018423|F|0--20:C>T			TGCAGGCATCTGAGCCTCTGCCGCGACTGCTTCGCCGCCGAGATCGGAAGAGCGGTTCAGCAGGAATGC	20:C>T	0.22	0.29	32	31	151	214	2	0.35	0.14
100007421|F|0--59:G>C	chr7R	749095742	TGCAGGCATCTGTAGTCGACCAGCGATGTTTCAGCGAGCTGATGCGCCAACTTCTGAACGTCCAGGTCG	59:G>C	0.4	0.37	100	49	60	209	2	0.48	0.23
100006486|F|0--27:T>G			TGCAGGCATGAACATGATGGAGCCGCTTCCGCTGTCGCCGAGATCGGAAGAGCGGTTCAGCAGGAATGC	27:T>G	0.38	0.36	123	18	73	214	2	0.47	0.08
100031736|F|0--18:A>T	chr6R	528563243	TGCAGGCATGTCCGCTTGATTCATTCTGAGGAGTGTGGTACTGTGGTTAAGCATAGCATGATGCAGTTG	18:A>T	0.09	0.15	14	8	172	194	2	0.17	0.04
100072614|F|0--61:A>C	chr5R	541393725	TGCAGGCATTCCTGGAGCAAGGGATACCTACCACGCCCCATATGCTCGTGGCAATGATGCCAAAGGTAC	61:A>C	0.19	0.26	33	17	164	214	2	0.31	0.08
100055649|F|0--49:G>C	chr3R	123106969	TGCAGGCCAAACAATTAAAGCCAATTCAGTTTCAGCTCGATCTCAAGAAGGAACATGCAGGGTACACGG	49:G>C	0.27	0.32	47	11	138	196	2	0.39	0.06
100044261|F|0--11:A>C	chr6R	566464845	TGCAGGCCAAGAGGGGTACGTTTCCTTCCTCCTCCACCACCTCACCTCCCTTCTCGCTGAGCTCCACGC	11:A>C	0.14	0.21	14	19	140	173	2	0.23	0.11
100014345|F|0--28:T>C	chr4R	780001448	TGCAGGCCAAGCTGGACTCCCGCCACCCTAGCTTTGTCAAGCCCATGACCCAGTCTCACGTCACCGAGA	28:T>C	0.35	0.35	63	24	127	214	2	0.46	0.11
100039041|F|0--28:C>A			TGCAGGCCAAGGATCACACCAGAACTGGCGTGGGGCGCAATACACACCCGAGATCGGAAGAGCGGTTCA	28:C>A	0.33	0.34	115	23	51	189	2	0.44	0.12
100010229|F|0--54:C>G	chr4R	888860279	TGCAGGCCACAAAAGCCTCTCGTCTCCACTGTCCCCTGTTTGCACCCTCATCTCCAGATCTCTCATGTG	54:C>G	0.08	0.13	167	21	4	192	2	0.14	0.11
100011454|F|0--8:A>G	chr4R	811270861	TGCAGGCCACAGCAGGGTCGAATACTGAATGATTCAGATGGTGTAAACACCAATTGAAGTGACGAAAAG	8:A>G	0.35	0.35	62	4	116	182	2	0.46	0.02
100036728|F|0--46:G>C			TGCAGGCCACCAGCCATGCGTACTGAGGATGCGCGTGCGCTCTTGGGTCCGAGATCGGAAGAGCGGTTC	46:G>C	0.45	0.37	72	10	91	173	2	0.49	0.06
100013395|F|0--45:C>T	chr3R	658930458	TGCAGGCCACTACGAAACTTGCCTCGTGATCCCGAGCAATGCCCCCTATGCCTAATTTGTTAAGCTCAT	45:C>T	0.14	0.21	22	8	157	187	2	0.24	0.04
100013395|F|0--60:T>C	chr3R	658930458	TGCAGGCCACTACGAAACTTGCCTCGTGATCCCGAGCAATGCCCCCTATGCCTAATTTGTTAAGCTCAT	60:T>C	0.12	0.18	156	8	17	181	2	0.21	0.04
100022005|F|0--65:T>G	chr1R	476105155	TGCAGGCCATCGAGGCATGTCTCCTGGTTGGTCAGGATCGCCGAGAGCAACGTCTGCACGTCGTCTGCC	65:T>G	0.12	0.19	165	16	16	197	2	0.21	0.08
100111024|F|0--64:G>C	chr3R	19253698	TGCAGGCCCAATTCAGAGTGAAGGATGTGGATGACCCTGATGCGCCCACGTCTACTGGCTGGTCGTACG	64:G>C	0.34	0.35	85	61	30	176	2	0.45	0.35
100066384|F|0--31:G>C	chr4R	881755336	TGCAGGCCCACGTCGCCGACCGCCTCGCCGCGCTCTCCGCCTCCGCGCAGCAGGGACAGCAGGGGCCGC	31:G>C	0.35	0.35	118	10	62	190	2	0.46	0.05
100090116|F|0--10:G>T	chr5R	734987159	TGCAGGCCCAGCGCCGACTCCTGCGCGGCCTCCTTCTCCATCGCGAGCCGCGCCGCGGCCGCCTCCAGC	10:G>T	0.17	0.24	35	2	173	210	2	0.28	0.01
100041039|F|0--55:A>T	chrUn	9254247	TGCAGGCCGAGCAGCCCTTCGCCGAGATCCTCTCCGCCTCCAGCACCACCTCAGCAGATCCCCAGGAGT	55:A>T	0.18	0.26	24	23	145	192	2	0.3	0.12
100039920|F|0--31:T>C			TGCAGGCCGAGGCCGGAATGCTTGAGTGCCTTGTTACAAGAACCGAGATCGGAAGAGCGGTTCAGCAGG	31:T>C	0.34	0.35	133	8	67	208	2	0.45	0.04
100041380|F|0--55:C>G	chr6R	857405505	TGCAGGCCGAGGCGCCGACGCCCGCCGCCAACCCCTTCGCCGACACCCTGCTCACCGCGCCCAAGCCCG	55:C>G	0.31	0.34	51	10	117	178	2	0.43	0.06
100019767|F|0--59:C>T	chr1R	384718699	TGCAGGCCGCCTTGTTATCCTTGTGTTCTTCTTTTCTTTTGATGGGAATGTTTTCCTTTCGTTCTGACG	59:C>T	0.49	0.37	84	13	79	176	2	0.5	0.07
100080290|F|0--52:C>G	chr4R	2332397	TGCAGGCCGTCATGGCGGACCCAGCTGGGCTTCTCCGTCAGCATCTCCGCGCCCCCCTCTACCTGCCGC	52:C>G	0.24	0.3	42	9	145	196	2	0.36	0.05
100075950|F|0--61:C>G	chr5R	463800367	TGCAGGCCTCGCCCACCGCGCTCGGCTCCATCGCGCTCTCCCGCTCCGTCGTGCAGGCCGCCTGCTACC	61:C>G	0.49	0.37	87	9	89	185	2	0.5	0.05
100007714|F|0--25:T>C	chr2R	732022904	TGCAGGCCTGCGACCACTACTAGTGTGTAGAAGCAAATGCCATGCACATTGGTGGACTGATCTTGGCCA	25:T>C	0.49	0.37	89	25	84	198	2	0.5	0.13
100079159|F|0--34:A>G	chr3R	539730677	TGCAGGCCTGGAAGCGCGCCATCCTCTCCGACCCACGCAACGTCACGGGCTCCTGGTCGGGCCCCGAGA	34:A>G	0.22	0.29	34	27	153	214	2	0.35	0.13
100068826|F|0--9:G>T	chrUn	74216383	TGCAGGCCTGGCCAAATGGGCCGGCACGGCCAAGTTATGCGGGCTGGGCTGGCATGCGTGCTGCCCTCC	9:G>T	0.08	0.14	13	4	167	184	2	0.15	0.02
100074730|F|0--28:G>C			TGCAGGCCTTCGTCCCCGATCTCGAGGTGGCCGTCGCCGACCTCCTCGCCTTCTTCCGAGATCGGAAGA	28:G>C	0.35	0.35	70	11	133	214	2	0.46	0.05
100007790|F|0--43:T>A			TGCAGGCGACAGCTACAATGGAGCAACTATTTGCTCTCTAAAATACACTCCCGAGATCGGAAGAGCGGT	43:T>A	0.16	0.23	164	13	26	203	2	0.27	0.06
100000715|F|0--36:C>G			TGCAGGCGATGCTTGCTCATTGCCCATCCCTGGAGTCCGCAAAGCTCAAGAACATCACCGAGATCGGAA	36:C>G	0.08	0.13	6	20	184	210	2	0.14	0.1
100057885|F|0--13:T>C	chr2R	624485190	TGCAGGCGATTGCTCAAGTGAGGACGGTCTACTCCTACGTGGGGGAGTCCAAGGCCCTGAATTCCTACT	13:T>C	0.27	0.31	148	18	48	214	2	0.39	0.08
100027632|F|0--40:A>G	chr2R	736295354	TGCAGGCGCAGAGCAAGCTCGTCCCCAACCAGATGCTACGATACACGCGCTACTTCCGAAACCCAGCCG	40:A>G	0.3	0.33	46	26	126	198	2	0.42	0.13
100007773|F|0--19:G>A	chr5R	824200099	TGCAGGCGCCGAGCCAGTCGATGGGGATCGGGACGACCAACAGCCGCAACCTGAGCCAGATGCTGAGCC	19:G>A	0.08	0.13	172	21	5	198	2	0.14	0.11
100064506|F|0--38:T>C			TGCAGGCGCCGAGGGGTTGATCACCGTGTCGAATTGTTTCGTTCATTGTCCGTCCGAGATCGGAAGAGC	38:T>C	0.37	0.36	103	14	57	174	2	0.47	0.08
100053417|F|0--47:G>A	chr5R	756665639	TGCAGGCGCCGCACGTTCGCCGCTATCTCCTCGGCCACATTCTTGGCGAAATCCTCCACCTCGGCGAAG	47:G>A	0.5	0.37	95	12	94	201	2	0.5	0.06
100039410|F|0--19:T>C			TGCAGGCGCCTCCAATTTCTATCGACTTGAATCCCGACGTCCATCGGCACCAACCCGAGATCGGAAGAG	19:T>C	0.21	0.28	154	12	36	202	2	0.33	0.06
100005186|F|0--55:C>T	chr6R	867791044	TGCAGGCGCCTTTCTCCTTCTTGAAGGCGTCGATTTTGGCCTTGTCTCCCTCCCGCCATGCTCTCAGAT	55:C>T	0.43	0.37	65	24	91	180	2	0.49	0.13
100072921|F|0--43:C>T	chr6R	814711136	TGCAGGCGCGCGGCGGCTGCTTGGGTTACTGGTGTCGACTGGGCTGGTGTCCATGCATAGTGCATGGGC	43:C>T	0.26	0.31	49	13	152	214	2	0.38	0.06
100024974|F|0--17:A>G	chr2R	74833146	TGCAGGCGCGGAGGAGGACTTCAGGCGTGATGCACACGATGAACTCGAGCATAGTATGCGCAAGCACAC	17:A>G	0.18	0.25	27	17	154	198	2	0.29	0.09
100071013|F|0--9:A>C	chr3R	797810350	TGCAGGCGGAGAGGGTGGCAAAAAAAAATCACTTATAAACTCAAACGCATGCCGCCGAAGACCGAACTC	9:A>C	0.08	0.14	12	7	172	191	2	0.15	0.04
100071317|F|0--68:C>T	chr7R	834437586	TGCAGGCGGCTCATCGCGCAAGGATTTGCAGGATTTCGTTGCACACCTCACTAGGTGATACTATAGGCC	68:C>T	0.3	0.33	53	8	128	189	2	0.42	0.04
100090066|F|0--25:G>A	chr3R	177242519	TGCAGGCGTACCAGATGGCGAGGTAGATGAGGAAGGTGAGGATGCCGATGGCGAAGGAGAGGCCCATGA	25:G>A	0.25	0.3	149	20	43	212	2	0.38	0.09
100064297|F|0--7:G>A	chr6R	616116153	TGCAGGCGTACTGTTGAGGTCGTTGGAGGGCGGCGCCACGATAAGCACGCCGTCGTCCTTGGGCGAGCT	7:G>A	0.36	0.36	117	38	59	214	2	0.46	0.18
100025784|F|0--25:C>A			TGCAGGCGTCAAAAGGACGAGCCTTCGCTGAAGAGAGGCACCACTTGGGCCGAGATCGGAAGAGCGGTT	25:C>A	0.2	0.27	164	15	35	214	2	0.32	0.07
100018333|F|0--36:A>G			TGCAGGCGTCACCGTCACCTCCTCGATCAGCGCCTCAATCTCCGAGATCGGAAGAGCGGTTCAGCAGGA	36:A>G	0.05	0.09	6	9	185	200	2	0.1	0.04
100075531|F|0--12:T>G	chr5R	784194701	TGCAGGCGTCACTTCCACCTCCGCCATCAGCTCCTCAATCTCTGGATACGTGGCATGGTAGTCGATGGA	12:T>G	0.43	0.37	81	20	111	212	2	0.49	0.09
100004447|F|0--58:G>A			TGCAGGCTAAATTTGTAGAGCTGGTAAGTATGTGCTCCGCAGATCTTGTAATTTAGCAGAGCCGAGATC	58:G>A	0.49	0.37	84	19	79	182	2	0.5	0.1
100080903|F|0--42:A>G	chr7R	764152084	TGCAGGCTAAGCGTCGCGATCAGCCTCCTAGGAGCCTCGTGCAGCGCATCGTCGTCAGCGGATGCGCCA	42:A>G	0.43	0.37	71	18	96	185	2	0.49	0.1
100074729|F|0--32:C>A	chr3R	862501588	TGCAGGCTACCCACGGGCGGTCCGAAGAATTTCTCTGCGCGGCTGCACACACAAACGACGGCGATGCCG	32:C>A	0.3	0.33	144	8	60	212	2	0.42	0.04
100008470|F|0--48:A>C	chr1R	556881058	TGCAGGCTACCTGGTTCATTTCATCTTTGGAGTGACAGGGAAGTAACCACTGTAGGGCTTTGACCTTCA	48:A>C	0.2	0.27	30	17	150	197	2	0.31	0.09
100039850|F|0--58:A>C	chr3R	939379057	TGCAGGCTACGCGCCACATATGGTAGTATTGTACACACACACGGGCAAACTGTTGGTCAAAGTGGATCC	58:A>C	0.25	0.3	37	12	126	175	2	0.37	0.07
100005316|F|0--5:G>A	chr5R	683162770	TGCAGGCTACTAGAGTAAACTGAGTGATGCAGCAGCCACCCACAACCATCAACCATGACAACCAAAATG	5:G>A	0.22	0.28	149	17	36	202	2	0.34	0.08
100047166|F|0--22:C>T	chr1R	569418790	TGCAGGCTAGAAACAGCGGCATCTATAAGCAGTACACGAAAGTGGCCGGAGCCTCCTTACCGGCTTCGG	22:C>T	0.33	0.35	61	6	126	193	2	0.44	0.03
100056858|F|0--8:C>G			TGCAGGCTCAGCTCCGTGACGCCGCCGTCGGCATTGCACGACACGCCGAGATCGGAAGAGCGGTTCAGC	8:C>G	0.23	0.29	38	15	145	198	2	0.35	0.08
100029618|F|0--29:A>C	chr3R	884491481	TGCAGGCTCCAGATATGGAAGCTCGCCACACGCCTCTGGAACGCCGTCGTCGACCGCGCCAACTCCGCC	29:A>C	0.18	0.26	33	13	168	214	2	0.3	0.06
100068555|F|0--66:C>T	chr5R	826539345	TGCAGGCTCTTGACGTAGGTCCAGGCCTCCCGCTGCGAGACCTTGTCCCACCAGCGGCTGACGTTCCTG	66:C>T	0.32	0.34	128	12	57	197	2	0.44	0.06
100039724|F|0--34:T>G	chr6R	421451991	TGCAGGCTGATTATATTGCTAGCGATGGATGTCCTACATTGGGGACGGAGGCCTGCAACGACGCCGAGA	34:T>G	0.16	0.23	169	21	24	214	2	0.27	0.1
100015894|F|0--29:C>T	chr5R	392427994	TGCAGGCTGCCCCCAACCAGCAGGCCATCCCCTCGTCTGAAGCTCTCTACTCCCTGTTGTCTCCGAGAT	29:C>T	0.11	0.17	11	23	179	213	2	0.19	0.11
100015030|F|0--16:T>G			TGCAGGCTGCTGCTCCTTCCTCCTACGCTACGCTTTCCTCCCGAGATCGGAAGAGCGGTTCAGCAGGAA	16:T>G	0.44	0.37	110	11	86	207	2	0.49	0.05
100003256|F|0--66:G>A	chr1R	466698830	TGCAGGCTGGAGCACAATCGGTGACGTGCAGTCAATTTCTAGCCACCGTCAGATTTCAATCCAAGGGCT	66:G>A	0.31	0.33	131	20	52	203	2	0.42	0.1
100008654|F|0--59:G>A	chr7R	875154864	TGCAGGCTGGTGGTGCGTGCGTTGATGCTCCAGGCTCCAGGTCATGAACTAACTAAGTTGTCAGATCCC	59:G>A	0.11	0.17	185	9	18	212	2	0.19	0.04
100053089|F|0--41:A>G	chr7R	569756992	TGCAGGCTGTTCGACCCATGTCTTCACCTGCCCGCTGGATAATTCGGGTGTGCATGCTCGCGCCTTCGA	41:A>G	0.22	0.29	142	19	34	195	2	0.35	0.1
100063344|F|0--9:C>T	chr5R	554600953	TGCAGGCTTCTTCTCTCTGGCGGCGAGCTTTCTTCCTCGGAGAATCGCAGTCGAGCGGATCTCGTCAGC	9:C>T	0.21	0.27	34	8	142	184	2	0.33	0.04
100048463|F|0--67:C>A	chr5R	124613705	TGCAGGCTTGTATTGGGAATGCCATCCGCTTCCAGCGTGCGGTTGACCGGGCTGCCATCACAATAATCT	67:C>A	0.41	0.37	84	2	123	209	2	0.48	0.01
100029754|F|0--51:C>T	chr4R	687634619	TGCAGGGAAATTCACCAGTGGCTAGAGGGATTCGACGATCACTTTGTACACCATATTCCGTCTACCACT	51:C>T	0.08	0.14	162	6	12	180	2	0.15	0.03
100004921|F|0--7:A>G			TGCAGGGAAATTTTAGGTCGTCCTGTTTCGCCAGAATCGTTTCTTCTCCGTCACCGAGATCGGAAGAGC	7:A>G	0.14	0.21	17	21	160	198	2	0.24	0.11
100010294|F|0--25:A>G			TGCAGGGAACGTATCTGGTGCAACAACGAGTTTGGTGCTGCCGAGATCGGAAGAGCGGTTCAGCAGGAA	25:A>G	0.32	0.34	51	21	121	193	2	0.43	0.11
100010741|F|0--13:A>T	chr6R	883999799	TGCAGGGAAGCAAAGAGGTACATACGACAGTTAGCCAGCGAGAACAAGGAGACACACAATCCCCAGTTA	13:A>T	0.18	0.25	25	12	139	176	2	0.29	0.07
100078190|F|0--45:G>A	chr6R	646457232	TGCAGGGACCCTGAGAGCACCGCCTATGTTGTGTCCCTGGGGGTAGCTATTTTAATCTACATTGTTCTC	45:G>A	0.31	0.34	128	15	54	197	2	0.43	0.08
100003682|F|0--53:C>A	chr6R	688382290	TGCAGGGACGAGGGCTTCGACAGCGGCCATTGCAAGAACACCTGGACATGCATCTGCTACAAGAACTGC	53:C>A	0.39	0.36	120	11	75	206	2	0.48	0.05
100071306|F|0--34:C>T	chr4R	810011009	TGCAGGGACTAACGGGCATGGGAGGGAAGCAAGGCGTGAGGAACATACCAGCGGCAGATTGGGCGCATA	34:C>T	0.15	0.22	25	13	169	207	2	0.26	0.06
100001501|F|0--28:A>G			TGCAGGGACTCCCATCTGCTGATCTCCCATGGAATGCTTCCGAGATCGGAAGAGCGGTTCAGCAGGAAT	28:A>G	0.27	0.32	32	34	115	181	2	0.39	0.19
100035584|F|0--7:A>G			TGCAGGGACTCGACACGTAGGCGCCATGCATTGGCCGAGATCGGAAGAGCGGTTCAGCAGGAATGCCGA	7:A>G	0.38	0.36	108	24	61	193	2	0.47	0.12
100008253|F|0--32:C>G			TGCAGGGACTGGACGTAGTTGATGATCTCGTCCAGCATGCCGAGATCGGAAGAGCGGTTCAGCAGGAAT	32:C>G	0.27	0.32	43	20	135	198	2	0.39	0.1
100006349|F|0--61:C>T	chr2R	199038908	TGCAGGGAGAACAAGATGGTGCTAGTGTTGCGTTTAGCTTAATTTCGCTTGGATATAATGACAGAAAAA	61:C>T	0.25	0.31	156	7	50	213	2	0.38	0.03
100049755|F|0--29:C>G	chr5R	766833358	TGCAGGGAGAGCGCCCTGGTGATGTTGCGCAGCACGGCCTGCTCGTGCTGCTGCTCCTGCACGCTCGGG	29:C>G	0.27	0.31	43	26	141	210	2	0.39	0.12
100003284|F|0--65:A>C	chr4R	63059473	TGCAGGGAGATCTACAAGTGCATCCAGGACGAGCTGCTCTCGCTGCTCCTCCACCCCATGACCATAGCC	65:A>C	0.5	0.37	93	25	95	213	2	0.5	0.12
100020773|F|0--41:T>G	chr6R	758318928	TGCAGGGAGCTCACCATCGCCCAGCAGAGCTCGTAGAGGAATCGGGCCCTGGGGACCGAGATCGGAAGA	41:T>G	0.21	0.27	159	20	34	213	2	0.33	0.09
100009040|F|0--15:A>G	chr5R	543668211	TGCAGGGAGGAGAATAGAAGGCGCTCATTATTCAAGCCCGCGCACGCACCACGGAATGCATTGCCATGT	15:A>G	0.05	0.09	3	16	195	214	2	0.1	0.07
100073970|F|0--12:T>C	chr3R	889675305	TGCAGGGAGTGCTGTGCTTGCTGTTTTTGGAGTGTTTGCTGGTTAAATGTTGCCGTCTGTTGGTGCTGG	12:T>C	0.34	0.35	128	15	61	204	2	0.45	0.07
100002837|F|0--7:C>G	chr4R	11360008	TGCAGGGCAAGTTCCTGCTCAACAGCACCGTGGCCAAGGCCACCATCTACGTCGAAGGGCCCAAGGCCG	7:C>G	0.23	0.29	37	9	138	184	2	0.35	0.05
100082150|F|0--40:G>A			TGCAGGGCAATCCCGGCCTCTGCGGGTGGAAGCTCCTCGCGCCGTGCCACGCCGCCGAGATCGGAAGAG	40:G>A	0.12	0.19	180	15	19	214	2	0.22	0.07
100066139|F|0--23:A>C	chrUn	6091407	TGCAGGGCAGAGGCGAGACGTAGAAAGCATGTGTGTGCACAGGTTTGGAGATGAGTGTTTGATCCACCT	23:A>C	0.39	0.36	62	23	103	188	2	0.48	0.12
100009048|F|0--27:T>C	chr3R	267795008	TGCAGGGCATCACACCAGCAACGCGAATGTAACCCGATATAGAATACCATAGAGGCACGGAGGCCAGCC	27:T>C	0.17	0.24	165	23	25	213	2	0.28	0.11
100001020|F|0--12:T>A			TGCAGGGCATCTTCCAATGCAATGTGCTCGACACCACTCCGAGATCGGAAGAGCGGTTCAGCAGGAATG	12:T>A	0.08	0.14	173	16	8	197	2	0.15	0.08
100060858|F|0--30:T>C			TGCAGGGCCCGATGCGGAGCGAGCGCAACGTGGTGCAGGAGAAGAGACCCCCCGAGATCGGAAGAGCGG	30:T>C	0.31	0.34	116	24	45	185	2	0.43	0.13
100007384|F|0--10:C>G	chr1R	543267156	TGCAGGGCCTCGGGATGCTGGCGCTCTCGTCCATGTTCTCGTCACCTCACAGCGAACAATGCAAACTCG	10:C>G	0.24	0.3	44	5	148	197	2	0.36	0.03
100068809|F|0--39:C>T	chr4R	872693472	TGCAGGGCCTCGTGCACGCGATCACTACCGCTGCGGCGCCCGCGCCCACGGCCGCACTAGGCATGGAAA	39:C>T	0.08	0.14	9	17	188	214	2	0.15	0.08
100048939|F|0--23:G>C			TGCAGGGCGATGGGCGACCAGCTGGAGGGCGACGAGGGGCAGCACATGAAGTACCGAGATCGGAAGAGC	23:G>C	0.23	0.29	145	25	35	205	2	0.36	0.12
100077680|F|0--38:C>G	chr2R	772040560	TGCAGGGCGCCTTTGGATCGAATGGAGCTCCAGTCGCGCGGGCCGTGCGTGCGGACGTGCTCCAGCAGC	38:C>G	0.32	0.34	123	14	54	191	2	0.43	0.07
100084386|F|0--8:G>C			TGCAGGGCGGAGAGGTTGCAGAAGACGGCCGCCGGGATGGGCCCGAGATCGGAAGAGCGGTTCAGCAGG	8:G>C	0.07	0.12	173	7	9	189	2	0.12	0.04
100068806|F|0--12:C>G	chr2R	896720246	TGCAGGGCGGCGCTGGGTGCCGACAGGCGCGTGGACTACCACTTCTGCGTGTCCAGGCTGAGCCAGCAC	12:C>G	0.33	0.34	120	48	46	214	2	0.44	0.22
100015765|F|0--35:G>A			TGCAGGGCGTCAATTTTTCACTCTTCGGTCTTGGTGGCGACCTTGCTTTGCGCCACACGTCCGAGATCG	35:G>A	0.09	0.15	177	26	6	209	2	0.17	0.12
100058282|F|0--5:G>C			TGCAGGGCGTCGTTGTTGGAGAACTCGCGGCCGAAGAGCCGAGATCGGAAGAGCGGTTCAGCAGGAATG	5:G>C	0.05	0.1	167	16	2	185	2	0.1	0.09
100054028|F|0--7:C>G	chr3R	742617777	TGCAGGGCGTGCAGAGCATGTACGCCGTCGGGAAGGTGAAGATGTGCGCGTCCGAGTTCCACCTCGGCG	7:C>G	0.09	0.15	16	4	173	193	2	0.17	0.02
100021780|F|0--60:G>A	chr4R	797488583	TGCAGGGCTATACAAACCAAACTCGCCAACACAGCGTTCATACGGGCTAAGCTTAGGTACGACTGCGAG	60:G>A	0.17	0.24	164	22	24	210	2	0.28	0.1
100006052|F|0--42:T>G			TGCAGGGCTATTCGATTAGTGGTTGGATTTAGAACATCTGGTTCCGAGATCGGAAGAGCGGTTCAGCAG	42:T>G	0.45	0.37	84	24	104	212	2	0.5	0.11
100082876|F|0--41:T>C			TGCAGGGCTCAGCTGCGGCAATCCATTGCCGAGGCCGAGGCTGAGCTCGCCGAGATCGGAAGAGCGGTT	41:T>C	0.48	0.37	91	20	83	194	2	0.5	0.1
100008634|F|0--38:G>C	chr2R	189815868	TGCAGGGCTGCGCCATGCAGCTGTTGTTGCTACTGAGTGCATCGCTTTACCTAACATCATATGATGATG	38:G>C	0.41	0.37	118	18	78	214	2	0.48	0.08
100008870|F|0--38:G>A			TGCAGGGCTGGCCAAGATCCTGAAGAAGTATGACAAGCGTACGGGGCGGCTACTCCGAGATCGGAAGAG	38:G>A	0.33	0.35	127	29	56	212	2	0.44	0.14
100049352|F|0--46:C>T	chr4R	849425914	TGCAGGGCTGGCGTCGCTGGGCGGGGGCGCGCTACCAGAAGGTCTTCGGCATACTTGATGGAATTATCG	46:C>T	0.41	0.37	65	18	99	182	2	0.48	0.1
100027889|F|0--36:T>A	chr4R	895654594	TGCAGGGCTTCCTAGCAGTTGCATGATGCTCGCGGCTGATCCTCTCTGCCTGCTCAATGTAAACGCTTC	36:T>A	0.22	0.28	145	7	38	190	2	0.34	0.04
100018316|F|0--36:T>G			TGCAGGGGAAAGGGTTCACTGACGGTGGAGCGCGTGTTGCCGAGATCGGAAGAGCGGTTCAGCAGGAAT	36:T>G	0.13	0.2	178	15	21	214	2	0.23	0.07
100058446|F|0--36:T>G	chr6R	720649878	TGCAGGGGAAAGGGTTCACTGACGGTGGAGCGCGTGTTGCCGGCGCCGAAGCCGTTCAAGCTGTGCTAC	36:T>G	0.13	0.2	156	6	20	182	2	0.22	0.03
100073242|F|0--28:G>A	chr5R	518263477	TGCAGGGGAAGGGCCTCTGCCTCATGCCGGTCTCCCTCGCCTCCGCCATCTCCTCCGCCACGTGCCAGC	28:G>A	0.43	0.37	97	17	70	184	2	0.49	0.09
100024522|F|0--47:G>A	chr2R	148015056	TGCAGGGGAATAGTGCCACTTACCAGTAGAAATGCAGAAGAACTTTAGAGGAACTGAAGTGCAGAACTC	47:G>A	0.38	0.36	60	13	102	175	2	0.47	0.07
100064490|F|0--34:G>A	chr1R	608314600	TGCAGGGGACCTGGAGACGGTTGAGTGCGTAGGCGATTGCAGAGCCCACGGCGAAGGAGAAGGCGAAGA	34:G>A	0.46	0.37	108	4	90	202	2	0.5	0.02
100017260|F|0--45:G>A	chr2R	741973840	TGCAGGGGACGCAAAGATTCCTTGGAACAGTGGGTAGTTCGGAGGGAAGCGTCAGAGCACAAGGAAGCC	45:G>A	0.2	0.27	155	31	28	214	2	0.32	0.14
100013414|F|0--29:C>G	chr2R	936365481	TGCAGGGGAGGGATCAGCCACTTGTTCCTCAACCAGCAGGAAAATGTGACTTGTTTCAACTCTGCTAGG	29:C>G	0.3	0.33	51	4	119	174	2	0.42	0.02
100035582|F|0--11:T>C	chr6R	304032379	TGCAGGGGAGGTGTGCGTTCCACGAGAGCGAGACTATCTTCCGCCGTGCGCACATGCTCTGCTTGTTTA	11:T>C	0.26	0.31	148	22	44	214	2	0.38	0.1
100003735|F|0--65:A>G	chr6R	697046368	TGCAGGGGATAAGGCTGCATCGATAGGTAGCTTAGCTCCGTGCTCGATTGGTCGATTTGCTATCGACTA	65:A>G	0.07	0.12	6	17	184	207	2	0.13	0.08
100075516|F|0--21:T>G	chr2R	37390385	TGCAGGGGATCACCGACTCGTTGTAGAACGCGGAAAAGGACACGCAGCAGTGGGGCGGCTTGGACGGTT	21:T>G	0.36	0.35	60	20	117	197	2	0.46	0.1
100072907|F|0--55:C>T	chr4R	78166357	TGCAGGGGATGGTCGAGGCAGCAGTGCATGCCGCCGACAAGGAGATGGCTAAGGCCGCCAGGAGGATAC	55:C>T	0.26	0.31	43	16	134	193	2	0.39	0.08
100040894|F|0--21:G>T			TGCAGGGGCCGTTGCAAGCCAGCAGATGCGTTGGAGAGGTCTGAAACCCCGAGATCGGAAGAGCGGTTC	21:G>T	0.09	0.15	13	11	179	203	2	0.17	0.05
100047894|F|0--27:T>G			TGCAGGGGCGACCTGCCATGTAAAGCCTACGGTGTTCACAGCGGAGGCGATGAGGTCACCGAGATCGGA	27:T>G	0.3	0.33	139	22	53	214	2	0.42	0.1
100075927|F|0--28:G>C	chr6R	845171451	TGCAGGGGCGCGACATCGTGCGGCCGCGGGGCCAGCGCAGGAGCCGCTTCCTCTTCTCCTTCCCCGAGA	28:G>C	0.34	0.35	134	12	67	213	2	0.45	0.06
100062407|F|0--10:C>G			TGCAGGGGCTCCGCGAAGACATCCTCGACGAACCGCCTACCGAGATCGGAAGAGCGGTTCAGCAGGAAT	10:C>G	0.31	0.34	52	15	126	193	2	0.43	0.08
100034740|F|0--44:C>G			TGCAGGGGGATGTTGGTGACGAGACCGCGTGCTCCTGCTGCTGCCGTAGTTGTGCAGCCGAGATCGGAA	44:C>G	0.47	0.37	98	31	85	214	2	0.5	0.14
100007615|F|0--51:A>G			TGCAGGGGTATCCTTTTCCTCGTTGAGGAAAACACAAAGTAGTATATAGCCATCTTCATCCCGAGATCG	51:A>G	0.38	0.36	31	73	73	177	2	0.47	0.41
100026680|F|0--27:C>T			TGCAGGGGTTGGCAAGACAGCAATTGTCGAGGGCCTTGCACAGCGTATCGCTGCCGAGATCGGAAGAGC	27:C>T	0.24	0.3	35	21	135	191	2	0.36	0.11
100065933|F|0--43:C>G			TGCAGGGTACAACGTCGTCGTCGCCGTCTGCCGCGCCCACATACTCTTGCCGAGATCGGAAGAGCGGTT	43:C>G	0.46	0.37	85	26	102	213	2	0.5	0.12
100030618|F|0--21:C>T			TGCAGGGTCCAGCTCCTGAAGCATGGCCATCAGCTTCGGGTCCCGAGATCGGAAGAGCGGTTCAGCAGG	21:C>T	0.08	0.14	12	11	191	214	2	0.15	0.05
100009102|F|0--65:T>C	chr7R	555466829	TGCAGGGTCGTTTCATCAAGGAAAACGAAGGTGTTGCAATGGCCGATTGAGACGAGCTGCGGCCTTCAT	65:T>C	0.09	0.16	184	20	10	214	2	0.17	0.09
100015666|F|0--61:C>T	chr7R	338375892	TGCAGGGTCTAATAAACTCCCCCTTTGGCTCCATGCTTTCTGAAAAGCGAGTGTATCGATGCATCCACC	61:C>T	0.39	0.36	69	27	117	213	2	0.47	0.13
100002630|F|0--52:T>C	chr4R	615129445	TGCAGGGTGAATCCACCACGCGTGCATGGACCATGATGCCACAAGTGCATTTTCCACTACTGTCCCCAT	52:T>C	0.3	0.33	122	18	48	188	2	0.42	0.1
100021338|F|0--26:C>G	chr7R	144443065	TGCAGGGTGCAAGCGAGCCGATTCGTCCGTCCAATTATTGAACCCATGCCTGGCTGGCCGTAGTCGTCA	26:C>G	0.22	0.28	43	7	164	214	2	0.34	0.03
100064111|F|0--24:A>G			TGCAGGGTGCTGGCAACGGAAGCAACATCAGGGGTGCATCCCGAGATCGGAAGAGCGGTTCAGCAGGAA	24:A>G	0.13	0.2	14	23	161	198	2	0.22	0.12
100077670|F|0--31:T>C	chr2R	758045838	TGCAGGGTGGCCCATGGCATGCGCGCACGCGTCCCCTCCCAGCCGCTCCGCGGAGAGACCACCATGATT	31:T>C	0.28	0.32	52	17	145	214	2	0.41	0.08
100058443|F|0--38:C>G			TGCAGGGTGGCGCGCGCGATGGCGGCATCATGTGGGCTCCATCCGAGATCGGAAGAGCGGTTCAGCAGG	38:C>G	0.41	0.37	69	13	102	184	2	0.48	0.07
100011098|F|0--17:G>T			TGCAGGGTTAGTTTGTGGACACACACTTGCCATGGGCAGCATTTCACCCTCTTGATTGTACAGACTACA	17:G>T	0.48	0.37	88	15	80	183	2	0.5	0.08
100071943|F|0--46:T>C			TGCAGGGTTCTGTGATTCCGCCTCGGGCGCCTCGGGGATCTCTCCGTTGCTCGCCGAGATCGGAAGAGC	46:T>C	0.15	0.22	168	27	19	214	2	0.26	0.13
100049929|F|0--67:C>A	chr6R	420350295	TGCAGGGTTGGATGGAGCACGGAGAGCACGGCTATGGCACGGCCCTAGCAACTTCTATGGGGATCTTCC	67:C>A	0.25	0.31	153	14	47	214	2	0.38	0.07
100001721|F|0--6:G>A			TGCAGGGTTTAATTAACCCAAATGACAAGTGGCACACGTGTGGCACGAATCACTCCGAGATCGGAAGAG	6:G>A	0.1	0.17	183	9	17	209	2	0.18	0.04
100002803|F|0--15:G>A	chr7R	734197607	TGCAGGTAAACGCCAGTTAATCCTTCAATCTTCAAAAGAAACACAAACCATCTGCATATATGTATCTAG	15:G>A	0.17	0.24	157	21	23	201	2	0.28	0.1
100067096|F|0--61:C>G	chr3R	659430245	TGCAGGTAACAGGGAGGGAGGTTTTGCTCTGTTTGGGATGGTTTATGTGGTTCGGGGCTCCCAGGGCGG	61:C>G	0.18	0.25	28	17	154	199	2	0.3	0.09
100045470|F|0--41:T>C	chr2R	918652573	TGCAGGTAACCGTATCCGAAACGTGAAGGGTAAACATCAACTTGACTCTTGACAAGGCCGAGCAGAGGA	41:T>C	0.47	0.37	96	19	84	199	2	0.5	0.1
100021416|F|0--19:A>G	chr4R	721329423	TGCAGGTAAGTGCAGCTGCACAGCGACAGATCCGCGAGGCACGGGAAAGCGAGACGCGCGGACGGCTGG	19:A>G	0.11	0.17	2	36	150	188	2	0.19	0.19
100002397|F|0--48:C>T	chr4R	829630263	TGCAGGTAATATTGCATGTATCTTAAAAAGCCAGTCCTTGGCTTTATCCTCCGTCCGCTCAATCATTGG	48:C>T	0.08	0.14	12	8	173	193	2	0.15	0.04
100002475|F|0--36:C>T			TGCAGGTACACCTCCACGCCTGCATGCACAAACACACACAATGTTTCATCGATGCCGAGATCGGAAGAG	36:C>T	0.16	0.23	20	21	147	188	2	0.27	0.11
100002475|F|0--44:T>C			TGCAGGTACACCTCCACGCCTGCATGCACAAACACACACAATGTTTCATCGATGCCGAGATCGGAAGAG	44:T>C	0.26	0.31	145	7	50	202	2	0.39	0.03
100079126|F|0--32:A>G	chr5R	852533849	TGCAGGTACACTGCCGACTAAAACATCGTAACATGACGAGAATGCCCTCGGAGCTGCTGGTTGCGTGAA	32:A>G	0.15	0.23	24	18	172	214	2	0.26	0.08
100006543|F|0--38:G>C	chr4R	163122629	TGCAGGTACATCTGGAGCGTGTAGGACCAGACACTGGAGAGCATGATGGGGATGTACCAGAGGGCGATG	38:G>C	0.34	0.35	127	29	58	214	2	0.45	0.14
100019720|F|0--27:C>T			TGCAGGTACCATTGATCGCTCATGCTCCAACGACGCTTCAGCCCCAACACCGAGATCGGAAGAGCGGTT	27:C>T	0.2	0.27	30	18	148	196	2	0.32	0.09
100103832|F|0--50:T>C	chr3R	829092244	TGCAGGTACGCCGCGAGCAGCAGCCACGCCACCGCGCGCGTGGCGGCATCTGCCTGGTCCACCACCGCG	50:T>C	0.27	0.32	147	10	52	209	2	0.4	0.05
100008198|F|0--37:T>G	chr4R	106213818	TGCAGGTACTACAAAGCTTAGGCAGGAATGGGCACTGTTTTTCAAGTTCAGCAGAGTTTTAGCTGCACA	37:T>G	0.23	0.29	141	22	34	197	2	0.35	0.11
100021269|F|0--68:G>C	chr3R	719469065	TGCAGGTACTACACCTCGTTCCAGCTGAGCGAGAAGAGCGACGTGTACAGCTTCGGGATCGTGCTGCTG	68:G>C	0.48	0.37	91	26	83	200	2	0.5	0.13
100013797|F|0--48:C>G	chr5R	510730129	TGCAGGTAGAACGTCACGCCTGACCCGACCGCGCCCTGCATGCCCAACCATCCACATTGTTTAACACTT	48:C>G	0.11	0.17	18	3	164	185	2	0.19	0.02
100083580|F|0--44:T>A	chr4R	10078928	TGCAGGTAGATCGTAGCTGAGGACAGGAACGACGCTGACCACCGTGGTATGCGCTTCTCTCCTTGACCT	44:T>A	0.38	0.36	32	66	75	173	2	0.47	0.38
100051514|F|0--61:T>C	chr7R	276890441	TGCAGGTAGGACCTCGGCGGTTCACAGGACAACCGCATGCGCAGGTGTTGCAGGGAATGACTGAGTCAT	61:T>C	0.37	0.36	122	25	67	214	2	0.47	0.12
100008522|F|0--34:C>T			TGCAGGTATAAATACACAAGCGCGCATCACCTACCGTTGAGTTGCCGAGATCGGAAGAGCGGTTCAGCA	34:C>T	0.17	0.24	20	32	161	213	2	0.28	0.15
100005760|F|0--24:G>A	chr3R	800967246	TGCAGGTATTTGACCCGAATGCTAGCTAGGGTTTTGACAGTAACCTCACCTCATGGAGCTATCATGTCT	24:G>A	0.32	0.34	138	14	61	213	2	0.43	0.07
100006603|F|0--20:A>G	chr5R	753638599	TGCAGGTCAAATGAGGACATAGGGATCGTATCATAAGCTTCACAATTTTCTTACCACATGAGGTACAAA	20:A>G	0.4	0.36	117	24	73	214	2	0.48	0.11
100004604|F|0--13:T>C	chr4R	883947326	TGCAGGTCAAGGATATGGAGCATGTTAACGGTCTTCCGCAGCACCCATGTGGCAACACCATGAGAATTG	13:T>C	0.42	0.37	72	10	101	183	2	0.49	0.05
100059355|F|0--42:T>G	chr5R	438189552	TGCAGGTCACACAACGCGTTTAGTGCTTTCTGTTGATGGTTTTGGAGTACTCTAGCCCGAAATCTGGTG	42:T>G	0.46	0.37	93	18	78	189	2	0.5	0.1
100029512|F|0--16:C>G	chr2R	113398344	TGCAGGTCACCGCGTTCTCGCCCCTCATCGACACCATCAACCGCCGCGACGGCACAGTCAACCGCTGCC	16:C>G	0.09	0.14	10	14	174	198	2	0.16	0.07
100003412|F|0--10:T>C			TGCAGGTCACTCACGACCCCTTGTGTTTCCCCATCTGCACCGAGATCGGAAGAGCGGTTCAGCAGGAAT	10:T>C	0.49	0.37	94	32	88	214	2	0.5	0.15
100003539|F|0--18:A>T	chr6R	605037389	TGCAGGTCAGCTACAAGTAAACATCATCTACATACCTAGTAATGAAACATGGAGCTCACATAAAATGGG	18:A>T	0.13	0.2	22	4	157	183	2	0.23	0.02
100007315|F|0--38:A>G			TGCAGGTCATGTATGGCGGTAATGCAATCCCTCAGCTCAGATGCCCTGTACCCGAGATCGGAAGAGCGG	38:A>G	0.33	0.34	53	31	126	210	2	0.44	0.15
100009632|F|0--16:A>G	chr3R	803624078	TGCAGGTCCATCACCAAGTCCTGATACTCCTGAATCCTAGAGCTTATATGAGACAGATACCTCGGGCTG	16:A>G	0.15	0.23	31	4	179	214	2	0.26	0.02
100001947|F|0--23:C>G			TGCAGGTCCCGCCCCTCCATCACCGTCTGGTTGCTCCGAGATCGGAAGAGCGGTTCAGCAGGAATGCCG	23:C>G	0.12	0.19	12	26	176	214	2	0.21	0.12
100001839|F|0--8:C>G			TGCAGGTCCCTCATGTACTAGCCCAGTTGAAGGTCTCGCCGAGATCGGAAGAGCGGTTCAGCAGGAATG	8:C>G	0.3	0.33	52	24	138	214	2	0.42	0.11
100030707|F|0--23:A>G	chr3R	73629868	TGCAGGTCCGAAGTTGCAGTGGTAAAAAACAAAACAGCGTCGTCCGCGAAGATAGAAGCTCTCGGTATC	23:A>G	0.23	0.29	5	76	110	191	2	0.35	0.4
100030286|F|0--21:C>G			TGCAGGTCCGAGCCAAGGGTACGACACGAGTTTAACCGCCGAGATCGGAAGAGCGGTTCAGCAGGAATG	21:C>G	0.31	0.34	49	12	116	177	2	0.43	0.07
100075090|F|0--50:A>G	chr1R	591683248	TGCAGGTCCTCATCGGCGACTGGTTCACCAAGGACCACGCCGTCATGGCCAGCCTCCTCGACGCCGAGA	50:A>G	0.1	0.17	10	20	168	198	2	0.18	0.1
100110158|F|0--14:T>C	chr1R	99955159	TGCAGGTCCTCCTCTGTCAACAGCGTCTTCTTCCCGCCGCTCCCAGCCTTGTCGTATGGCTGCGCCATC	14:T>C	0.38	0.36	66	10	110	186	2	0.47	0.05
100069839|F|0--27:C>T			TGCAGGTCCTGGCAGTCCCCCCGCGGCCTGGCAAAGAAAGGGGACGAGAGGGCCGCCCGAGATCGGAAG	27:C>T	0.16	0.24	26	17	169	212	2	0.27	0.08
100074290|F|0--58:G>C	chr4R	652880689	TGCAGGTCGACATAGGACCGCGTCGGCGGCAAGATGCACCCTGAGCGCATCCACGCGCGCGTCGCTGAC	58:G>C	0.41	0.37	105	37	69	211	2	0.49	0.18
100060850|F|0--11:C>G	chr5R	39698935	TGCAGGTCGGCCGTGGTGGCCACCAGCTCGTCCATGGTGGTGTCGAGGAGCTCCATGCAGTCCATGACG	11:C>G	0.36	0.36	73	10	131	214	2	0.46	0.05
100039404|F|0--20:A>C	chr2R	67127348	TGCAGGTCGGCGTCACTGAAACGCCGTCCCAGGAGACGCCTGGCGCCATAGATGGTGCGGTTCGGGTTG	20:A>C	0.09	0.16	10	20	181	211	2	0.17	0.09
100046828|F|0--11:G>C			TGCAGGTCGGGGCGCATCGGTCGCCGAGGCCGAGAAGACCGAGATCGGAAGAGCGGTTCAGCAGGAATG	11:G>C	0.23	0.29	159	10	45	214	2	0.36	0.05
100048743|F|0--24:C>T			TGCAGGTCGGGTTCCCCCCTAAGCCGCTCGACGACGCGAGCAAGACCATCGAGGAAGCCGAGATCGGAA	24:C>T	0.09	0.15	11	15	181	207	2	0.16	0.07
100024202|F|0--28:C>G			TGCAGGTCGTCCAAGCAGCAGGATGAAACGGAAGTCCCACGGCCACCTTGTCCGCCGCCGAGATCGGAA	28:C>G	0.1	0.17	11	21	180	212	2	0.18	0.1
100016591|F|0--40:A>G			TGCAGGTCGTCGACCTCAGCAGCAACTACTTCAGGGGCGCACTCCCGAGATCGGAAGAGCGGTTCAGCA	40:A>G	0.16	0.23	26	17	170	213	2	0.27	0.08
100006290|F|0--51:G>C	chr1R	716564444	TGCAGGTCTTGCGTGACTGACTGATACTTGAGCTGTAATAACTTGTGTTCGGTCAGGGCTCGAGCTTTT	51:G>C	0.18	0.25	166	20	28	214	2	0.29	0.09
100081459|F|0--46:A>G	chr5R	575645118	TGCAGGTGAAGGTGCTGGTGCTGTCGTCGTAGGCGTAGCTGTAGGCACGCGGGCACGCCATCTTGAAGA	46:A>G	0.17	0.24	18	25	136	179	2	0.28	0.14
100021505|F|0--18:G>A	chr7R	275386777	TGCAGGTGACATGAACTGGTATGTAATGCGTACCTGAGGTGAAGTTGAACTGCCTGACGCTGCCGATGC	18:G>A	0.33	0.34	122	22	54	198	2	0.44	0.11
100004948|F|0--33:A>G	chr7R	656049858	TGCAGGTGACCCCACGCCAGTCGCAGAATTCCCAGGACGCGCTCCTCCATGAAGCTAAAACTCTGCTTG	33:A>G	0.21	0.28	29	24	144	197	2	0.33	0.12
100046739|F|0--27:C>G	chr2R	741462733	TGCAGGTGACCGCCGTAACCGATCCCACCTCACCGTTTACGCAGTCTCTAGCAGCGACGCTGCCCGAGA	27:C>G	0.2	0.27	32	22	160	214	2	0.32	0.1
100005463|F|0--58:A>G	chr6R	689812435	TGCAGGTGAGCTGACCTGATTGGCAAATCCTTCTGAGGATGGTCATGTAGACGTTGACAGCCCCGCTGC	58:A>G	0.16	0.23	22	13	148	183	2	0.26	0.07
100070667|F|0--53:T>C			TGCAGGTGATGGAGATGAGCAGCACGGCGACAAGGCGGGACTCAGACAGGATGTCGCCCTCCGAGATCG	53:T>C	0.38	0.36	69	26	119	214	2	0.47	0.12
100004161|F|0--17:G>C			TGCAGGTGCAAAAAAACGCATCATCCTTTTGCACAAAACAAACCCCGAGATCGGAAGAGCGGTTCAGCA	17:G>C	0.48	0.37	92	22	99	213	2	0.5	0.1
100082837|F|0--59:G>C	chr3R	833859738	TGCAGGTGCAGCCAGGTGGAGTACTGGTCGGGGTGCATCTGCTGGTCCGACACCCGCACGGTCGGCACG	59:G>C	0.17	0.24	31	7	171	209	2	0.28	0.03
100009907|F|0--12:G>C			TGCAGGTGCAGGGGATCTCGAGCCTTATCCAGTGTACAGAGGGCGCTGGTTTAGAGGCCGAGATCGGAA	12:G>C	0.43	0.37	80	24	110	214	2	0.49	0.11
100004151|F|0--29:A>T			TGCAGGTGCAGGGTGGCGAGCGAGTAGCCAGGGCACATCCGAGATCGGAAGAGCGGTTCAGCAGGAATG	29:A>T	0.07	0.12	0	29	181	210	2	0.13	0.14
100037902|F|0--29:T>C	chr1R	384716239	TGCAGGTGCAGGTAAGCCGCCTGGAAAGATGACGTCGTCGCGAGTGCCGCCTCCAAGGCGGCCTCCTCT	29:T>C	0.23	0.29	35	28	151	214	2	0.35	0.13
100040550|F|0--62:T>A	chr4R	846897491	TGCAGGTGCATGGAACGTTGTCGCCAAGGCTCGGCCGTCGACGCCAAGGGAACCTGGAGGACTGAGGCC	62:T>A	0.07	0.12	189	10	9	208	2	0.13	0.05
100036190|F|0--49:C>T	chr6R	40200282	TGCAGGTGCCGCTGCACGTGCATGCATGGGCCATCGCACGTATTTTGATCGGATCTCGCGTCCGAGATT	49:C>T	0.13	0.2	22	8	168	198	2	0.23	0.04
100013098|F|0--38:C>T	chr2R	790532649	TGCAGGTGCGAGTATTCAATGGGACGGCTATCTGTCTACCCCCTAGAAAAACAAGGCAAAATGGGTCTC	38:C>T	0.38	0.36	65	23	115	203	2	0.47	0.11
100013098|F|0--50:A>C	chr2R	790532649	TGCAGGTGCGAGTATTCAATGGGACGGCTATCTGTCTACCCCCTAGAAAAACAAGGCAAAATGGGTCTC	50:A>C	0.14	0.21	21	7	145	173	2	0.24	0.04
100052571|F|0--42:T>C	chr3R	693980537	TGCAGGTGCGGATTCGCTTGCTGGTACTCCGCCAGCGTACGCTGCCCATCCGTATGATTCGGCTCCTGT	42:T>C	0.18	0.26	154	15	29	198	2	0.3	0.08
100004456|F|0--27:C>G			TGCAGGTGCTCAACCTCAGCCTGAATGCCCTCCAAGGAAGCATCCCGAGATCGGAAGAGCGGTTCAGCA	27:C>G	0.35	0.35	62	15	124	201	2	0.45	0.07
100060358|F|0--22:T>C	chr3R	644061168	TGCAGGTGCTCAATCTGGAGGATCTGCGCGGCGTCGCGGCCGAGGAGATGGGCATCCCGAGATCGGAAG	22:T>C	0.31	0.34	59	15	140	214	2	0.43	0.07
100012557|F|0--46:C>G	chr5R	399102851	TGCAGGTGCTCCAAAATGCAAAGCCATTAACCAGATTGCCACTTGTCGGCCCCATGCTAACTCCTCCAG	46:C>G	0.35	0.35	67	14	133	214	2	0.45	0.07
100011306|F|0--19:T>A	chr5R	717942617	TGCAGGTGCTCCCTGTTGTTGCATTGTAATCACACTGACTTGACATGAAAAGATGATGGGCTTCCAACT	19:T>A	0.38	0.36	110	14	65	189	2	0.47	0.07
100037407|F|0--10:G>C	chr7R	45292948	TGCAGGTGCTGAGCGCGCTGGACGCGGCCAAGACGCAGTGGTACCACTTCACGGCCATCGTCGTCGCCG	10:G>C	0.13	0.2	177	17	20	214	2	0.23	0.08
100055496|F|0--13:A>G			TGCAGGTGCTTGCAGAGATCGACGATAGGTTCTTGAAGGCGTCAGAGAGCGCCGAGATCGGAAGAGCGG	13:A>G	0.36	0.36	107	23	56	186	2	0.46	0.12
100005684|F|0--48:C>T	chr4R	12751568	TGCAGGTGGACCCTGAAAATGCTGAGATGGAGAAAGCGTTCACGTAAGCAGCTATCCTAACTCGTGCTC	48:C>T	0.39	0.36	47	56	90	193	2	0.48	0.29
100027977|F|0--6:T>A	chr1R	628734690	TGCAGGTGGACGAGTCGAGCATGACAGGGGAGCCCCACCCAATCGAGATCGATGCCGAGAAGAACCCCT	6:T>A	0.47	0.37	80	36	91	207	2	0.5	0.17
100073573|F|0--41:C>G	chr4R	193643287	TGCAGGTGGAGGTGGTGCTCCTGCTGCTGCCTCCTGCTCCCCGCCGCCAACTCCTCCATGGCCGCGGCG	41:C>G	0.31	0.34	124	9	54	187	2	0.43	0.05
100062573|F|0--28:C>A	chr2R	132751939	TGCAGGTGGCCGTGTGGGCGTGCATGGTCATGTCGGTGATGCTGGTGGTGGAGGCCCTGTGCAACTGCG	28:C>A	0.48	0.37	95	9	86	190	2	0.5	0.05
100081448|F|0--43:G>A	chr4R	582716032	TGCAGGTGGCGCCGCGGGGCTCGCACGCGCTGGTGGTGTCCACGGAGACCATCACGCCCAACTACTACG	43:G>A	0.25	0.31	138	10	43	191	2	0.38	0.05
100064670|F|0--60:C>G	chr6R	755335005	TGCAGGTGGCGCCGCTGGGCGTGCCGGCCGTGGCGCGCAGCTGCTACGAGAAGGCGACGGCCATGATGG	60:C>G	0.26	0.31	42	9	129	180	2	0.38	0.05
100052963|F|0--27:G>T			TGCAGGTGGCGGCGCCATTCTTGGTTGGTTGGTTGAGCTTGTTAGCCCGAGATCGGAAGAGCGGTTCAG	27:G>T	0.48	0.37	75	34	69	178	2	0.5	0.19
100026261|F|0--28:C>G	chr6R	775011095	TGCAGGTGGCGGGAGAGCTGGGCGCAACCAAGCTGGTGCTAGAGACGGATTGTGCCAACCTTGCCAAGA	28:C>G	0.12	0.19	16	17	176	209	2	0.21	0.08
100007485|F|0--46:G>C	chr1R	693482502	TGCAGGTGGGGTCTCTTCTCGGCCGCCATCAACCCTGCAAAACAAGGAAGCAACGGCATCAGCGGAAGG	46:G>C	0.35	0.35	133	9	71	213	2	0.46	0.04
100020809|F|0--40:G>A	chr1R	650405917	TGCAGGTGGTGCACCTCAACTCCTGTCTCTGCGGCGACAGGGACATGATGATGATTGTGGATGCCCCCG	40:G>A	0.35	0.35	118	9	62	189	2	0.46	0.05
100043644|F|0--47:G>C	chr3R	194465352	TGCAGGTGGTGGTAGAAGGTGAGGTTGCCGTCGTAGACGTGGAGCATGAGCGTCGTCGCCTGCCGCTCC	47:G>C	0.19	0.26	162	16	31	209	2	0.3	0.08
100037524|F|0--25:G>C			TGCAGGTGGTTGATTGATTCTGCGAGCGTCCGCTGCTGGTTCGTCCAATCTGTTCGCGCCGAGATCGGA	25:G>C	0.37	0.36	122	24	68	214	2	0.47	0.11
100058272|F|0--46:C>T	chr4R	771281227	TGCAGGTGTACGTGTTCGCGCTCTTCAACGAGGACCAGAAGCCCGGCCCGGCCTCCGAGCGGCACTACG	46:C>T	0.11	0.18	18	8	174	200	2	0.2	0.04
100056842|F|0--61:T>C	chr2R	92857079	TGCAGGTGTCGCACGCGTTCGGGCCGTGCTCACCGCTGGGAAGCGCGGCCGCAGCGCCGTCTTGGGCGG	61:T>C	0.41	0.37	107	18	72	197	2	0.48	0.09
100028445|F|0--28:C>T	chr2R	618520814	TGCAGGTGTTCATCGCGCTGCTCTGCGCCATGAAGTACGGCATCTTCCTCTTCTACGCCGTCTGGCTTC	28:C>T	0.06	0.1	4	14	180	198	2	0.1	0.07
100000759|F|0--13:T>G	chr3R	664705019	TGCAGGTTAATTTTGATCCTGCTAACATTACAGAAGAAGCTTCCATTTCCTCTCTGAGATCCGTTCGTC	13:T>G	0.13	0.21	163	10	21	194	2	0.23	0.05
100023586|F|0--38:G>C	chr2R	912277411	TGCAGGTTACAGGTGAAGACGCTGGGCAAGTTTTTCGCGATGAGCTTCAGCTGGGGCTTCTTCCAGTGG	38:G>C	0.05	0.1	195	15	4	214	2	0.1	0.07
100020683|F|0--43:G>T	chr4R	526809723	TGCAGGTTATGTTCCTTTATTGCAAACACTGCTCTGGTGATCAGCTAGTGTCGACCTACAGCAGTAGAG	43:G>T	0.34	0.35	54	13	111	178	2	0.45	0.07
100004658|F|0--40:G>A			TGCAGGTTCATGGAGACGCAATGACTCCAGAATCTCGACAGATGAGAACGTGAACCGAGATCGGAAGAG	40:G>A	0.07	0.12	189	21	4	214	2	0.13	0.1
100002831|F|0--15:T>C	chr3R	101510686	TGCAGGTTCCATCAGTAACAAAAGGCCAGTCGTCAGTTAAACAGAACCATTCTCGTTCAACCGTGGAGA	15:T>C	0.08	0.14	189	14	11	214	2	0.15	0.07
100084310|F|0--24:G>A	chr6R	764547382	TGCAGGTTCCATGGGTTCCCCATCGGCCAGCTTCGGGCGGGCGGCGTCCACAAAGGGAGCCCCTTGATC	24:G>A	0.12	0.19	182	10	20	212	2	0.21	0.05
100076321|F|0--32:T>C			TGCAGGTTCGCGTCTCCATGCTCCTTCGCTCTTCTCGCCTCAGCGGGGCAGGACGAGGACTCCGAGATC	32:T>C	0.14	0.21	139	24	12	175	2	0.24	0.14
100049840|F|0--28:A>G	chr2R	809277850	TGCAGGTTCGTGTGGTGGACGAAGGCCTACACGAGGCTCTGAAGCAGCAGCTGCTGCTGCTGAGCCCGA	28:A>G	0.24	0.3	42	10	141	193	2	0.37	0.05
100053899|F|0--36:A>G			TGCAGGTTCGTTGAGAGCGAGCAACCCGACGCTTCCACTTGGGCCGAGATCGGAAGAGCGGTTCAGCAG	36:A>G	0.17	0.24	18	36	158	212	2	0.28	0.17
100020223|F|0--68:G>A	chr7R	866608765	TGCAGGTTCTCCATGCCCAGCTCAAACCAATCACGACCGTTGGCAGCACGAAAATATATCAAGATATCG	68:G>A	0.4	0.36	115	15	74	204	2	0.48	0.07
100064101|F|0--34:A>C	chr1R	672367365	TGCAGGTTCTCCGAGCCCGAGTCCGACTCCGACGAGCCCCGCCCCAGGCCCGACTACAACAAGCCCATC	34:A>C	0.37	0.36	67	24	123	214	2	0.47	0.11
100056407|F|0--21:C>T	chr5R	194560833	TGCAGGTTCTCCTGGCGTTGGCCTGACTCCGAGGTGTAGACATGGGGAAGCACCGAATCGAGGCCGAGA	21:C>T	0.07	0.12	0	28	185	213	2	0.12	0.13
100001899|F|0--53:G>C			TGCAGGTTCTGCCACACCACCGTCCACAGCACCGCGATGATGCTGAGCACCACGCCGAGATCGGAAGAG	53:G>C	0.36	0.36	131	10	73	214	2	0.46	0.05
100075074|F|0--29:C>G			TGCAGGTTCTTCTCCAGCTCGTCGATCACCGCCCGCCCGCCGAGATCGGAAGAGCGGTTCAGCAGGAAT	29:C>G	0.24	0.3	125	13	35	173	2	0.36	0.08
100024521|F|0--57:A>G	chr6R	831896154	TGCAGGTTGCAAGGCAACCCTGGTAGCACCTGGGCGAGCACCCTCTCATTTGTATGCATTCGCACGCAT	57:A>G	0.4	0.36	62	17	98	177	2	0.48	0.1
100023875|F|0--57:T>C	chrUn	309208695	TGCAGGTTGGAGGGGACTAGCAAGCTTATGTCGCTCAAGGCTCATCCACGTATGTATTGATTAGTACAC	57:T>C	0.29	0.33	121	51	34	206	2	0.41	0.25
100000876|F|0--43:A>G	chr2R	809524399	TGCAGGTTGGCAAACACTATGCTCACAGCGGCCAGCACAAGCAACCTCATCTGGAGCATCACTCACAGG	43:A>G	0.09	0.14	5	24	169	198	2	0.16	0.12
100008553|F|0--25:T>C	chr5R	430634193	TGCAGGTTGGCTTGCAGACTTACCGTGACCTCCAATGCATCCATGGCTGGTTTCCCATGCAGCAAGTTC	25:T>C	0.27	0.32	148	17	49	214	2	0.39	0.08
100022720|F|0--30:C>T	chr5R	394452191	TGCAGGTTGGTCACCACCACCAGAGATTTCCAGGTACCATGCAACAAAGACAGTTGATATGTACTACGC	30:C>T	0.45	0.37	73	17	91	181	2	0.5	0.09
100014467|F|0--57:G>A	chr5R	857403140	TGCAGGTTGGTTGCTGATCCATGCAGAATAGTAGTGGTATTAAGGTTCAGTTGTGGTGCTAGTACTTGC	57:G>A	0.21	0.28	141	21	30	192	2	0.33	0.11
100026493|F|0--48:A>G			TGCAGGTTGTCGAGTTAGATTTTGTATATCCAAGTGAAGGAATCCATCAGCGATATGGCGCCGAGATCG	48:A>G	0.41	0.37	67	9	99	175	2	0.48	0.05
100014443|F|0--56:A>G			TGCAGGTTGTTTCTTGCATCCTAAAGCAACCTAGGATTAGTTCCTAGAGGTAGTAAACACATAGATCCC	56:A>G	0.41	0.37	105	11	72	188	2	0.48	0.06
100008561|F|0--29:A>T	chr3R	800219538	TGCAGGTTTAGCAAAAGAACAAATCCAGAATTCTAAATCTATCTAACTAGCCAGATGCAACTGTCCTGC	29:A>T	0.32	0.34	126	14	55	195	2	0.43	0.07
100065074|F|0--44:A>G	chr7R	171267992	TGCAGGTTTCAGAGGACGAGCCAGCTTATTACTCCTGGCTGGCGAATCCTAGCTAGCTTGAACCAGACG	44:A>G	0.39	0.36	114	12	71	197	2	0.48	0.06
100003917|F|0--29:G>A			TGCAGGTTTGAAATCTGAATACTCTCTTCGTGTTGTTTGGTGCAGGTATGAGCCGAGATCGGAAGAGCG	29:G>A	0.23	0.29	157	15	41	213	2	0.35	0.07
100006629|F|0--66:C>T	chr5R	669034884	TGCAGGTTTTGCAATCACGGTATACAGTTAGCAACATGCCTTGCGCAGATCGCACAATACAAATTTCCC	66:C>T	0.21	0.28	37	6	145	188	2	0.33	0.03
100010668|F|0--18:G>C			TGCAGGTTTTGTTCTCTGGTGACTAGCGAGCTCCAACTCAGGTCGACAACCGAGATCGGAAGAGCGGTT	18:G>C	0.12	0.19	171	16	17	204	2	0.22	0.08
100028206|F|0--6:A>T			TGCAGTAAAAAAGGAAGCGATTCCATCGAGCGAGCCCAGAGTAACAGCGCCACCGAGATCGGAAGAGCG	6:A>T	0.19	0.26	30	23	161	214	2	0.31	0.11
100002844|F|0--10:C>A			TGCAGTAAACCGTGCTTGCTCAAACTCACGAAATTGCCCGTGCGCATAGAGGGAATATTCCCGAGATCG	10:C>A	0.35	0.35	129	19	66	214	2	0.46	0.09
100014303|F|0--18:G>C	chr3R	11501370	TGCAGTAAACGTGTAAAAGACTTGACTAATTATCTTGTAAACAATCTACGCCCTGTGGAGTGTCTTCTG	18:G>C	0.4	0.36	104	6	67	177	2	0.48	0.03
100004391|F|0--19:A>G	chr3R	266105183	TGCAGTAAACTCGGCATGGACTGATCTCTGCGTACTTCAACAATGCAGCCCATTACCTCCCCGACTCAC	19:A>G	0.11	0.18	9	27	162	198	2	0.2	0.14
100002636|F|0--47:C>G	chr7R	831479830	TGCAGTAACTCATTCGGTAAAGCTCCAAACCCATGCAGTAACACATGCCAAGATATGTTATTTCTTGAT	47:C>G	0.3	0.33	57	6	137	200	2	0.42	0.03
100000760|F|0--25:T>G			TGCAGTAAGACGGAGATGAAAAATGTCTTGGAGTTTTTGCAGTGGACCTGAACTCCGAGATCGGAAGAG	25:T>G	0.45	0.37	105	24	85	214	2	0.5	0.11
100020186|F|0--53:T>G			TGCAGTAATACTAGTTCATCTTGCATTATCTTGCCGCATCACGTATGGCTATGTACATCGAACTATGGA	53:T>G	0.22	0.29	133	6	36	175	2	0.35	0.03
100004119|F|0--36:C>G	chr5R	610091811	TGCAGTAATGCTCATGAGATGATGCACGCAATATTCCAGTTGCCTGAAGATAAGAGGCTACTAGTCACA	36:C>G	0.07	0.12	8	10	177	195	2	0.12	0.05
100001920|F|0--54:C>A			TGCAGTAATGGGACAGGAACTCCATGGTGAACCGCTTCATCTCCAGGTCGTCCCCGTAGTCCGAGATCG	54:C>A	0.11	0.17	182	18	14	214	2	0.19	0.08
100007944|F|0--54:C>G	chr2R	732191547	TGCAGTAATTGTCATCCCCATGATGTTCCGCGAGATGAAGTGGTACTATGTTGTCATTGCATACCTACT	54:C>G	0.19	0.26	27	26	158	211	2	0.31	0.12
100013402|F|0--58:T>A	chr2R	736993463	TGCAGTACCAATTAAGTACTCCGTATTTAACTCTCTGTTACTGTAGCCATTAGTTAACTGCACTGGTGG	58:T>A	0.36	0.36	113	26	59	198	2	0.46	0.13
100010474|F|0--56:T>C	chr5R	67840869	TGCAGTACCACCGCCTCCGCTGATTCCTTAGGCGTCTGTGCCATGGGAAGCCACGCTAGAGGACGCCTC	56:T>C	0.15	0.22	20	18	156	194	2	0.25	0.09
100039909|F|0--9:A>G			TGCAGTACCATCAAGAAGGACGGGAGCGGCCATGCCGAGATCGGAAGAGCGGTTCAGCAGGAATGCCGA	9:A>G	0.45	0.37	93	22	74	189	2	0.49	0.12
100002772|F|0--17:A>C			TGCAGTACCATGAGAAGACAACTCTTTGAAACGTGACATACCAAGACCACCGAGATCGGAAGAGCGGTT	17:A>C	0.23	0.29	36	9	132	177	2	0.35	0.05
100000829|F|0--16:G>A			TGCAGTACCTGTACCAGCAGCAGTATGCCATCTTCAACCAATCCGAGATCGGAAGAGCGGTTCAGCAGG	16:G>A	0.14	0.21	158	25	15	198	2	0.24	0.13
100029183|F|0--42:T>A			TGCAGTACCTTAACCTCTCTCACAATTCGCTCTCCGGTGGCCTGCCGAGATCGGAAGAGCGGTTCAGCA	42:T>A	0.26	0.31	144	20	43	207	2	0.38	0.1
100050850|F|0--29:C>T	chr2R	71770449	TGCAGTACGAGCTGCATCAGCAGGGAAGGCCGCTGCGTCAGCAGTAGCAGCGCACCGCTGCTGACGCTA	29:C>T	0.38	0.36	73	16	125	214	2	0.47	0.07
100051715|F|0--68:C>G	chr4R	700330481	TGCAGTACGGTAGAAGCATAATTAGCTGGCGCGACTGGCGGTCAACTAACCATGGGAATGTCGTTGAGC	68:C>G	0.14	0.21	20	9	149	178	2	0.24	0.05
100026279|F|0--59:A>G	chr4R	730057773	TGCAGTACTACCTGGCGCTTGCATTCTGGAAGTGATTCATGGCTTCTATATTTGCCTACAGAGACACTG	59:A>G	0.34	0.35	44	56	114	214	2	0.45	0.26
100011020|F|0--20:A>T	chr2R	146142584	TGCAGTACTACTGCAATAGAAGGGGAACTTGAATGACCAACACAGCACAGCATGTTTGCCATGTCGTCT	20:A>T	0.49	0.37	86	18	91	195	2	0.5	0.09
100028517|F|0--29:G>A	chr3R	855696810	TGCAGTACTGCCTCGGAGTCGGAGGCGAAGAACTGATTTGCATCCAAAAAACACATGACCGTCATGGAA	29:G>A	0.35	0.35	130	14	66	210	2	0.45	0.07
100019041|F|0--28:A>C	chr2R	681728847	TGCAGTACTGCTAGCTAGTCAGCTCACCAAAAAAATATACTACGCGTCTCTTGCTCGTCAGCCAATCGC	28:A>C	0.5	0.37	91	9	92	192	2	0.5	0.05
100018984|F|0--8:T>A	chr2R	800607898	TGCAGTACTTCAAAATGTGGAAAACATAATGATTTGTTACAACAACTGGTAGCGCCTGTAGCCTTCGTC	8:T>A	0.18	0.25	154	12	28	194	2	0.29	0.06
100007939|F|0--61:C>T	chr4R	739948785	TGCAGTACTTCTTCCCCATCTTCCACTGGGGCTCCAACTACAGCCTCCGCCTCCTCCGCTCCGACGCCG	61:C>T	0.13	0.2	21	12	181	214	2	0.22	0.06
100004774|F|0--7:C>G	chr2R	761591022	TGCAGTACTTGTAGCTGTACCTGTGGAAGGGCACCTTGCCTGCCAGGGACGAAAAACAGCAGGAACATG	7:C>G	0.12	0.18	19	5	162	186	2	0.2	0.03
100012442|F|0--24:T>C			TGCAGTAGAATTCTTCTTGATCGGTCAATGTTTACCAATGAGATGCCGAGATCGGAAGAGCGGTTCAGC	24:T>C	0.48	0.37	76	13	84	173	2	0.5	0.08
100030994|F|0--16:T>A	chr1R	506927243	TGCAGTAGCCACAGACTAGCAGGGCGATGCAGGCGACGATGATGTAGAGCTTCCCCTTCTGCTGCTGCG	16:T>A	0.15	0.22	168	4	28	200	2	0.26	0.02
100065064|F|0--51:A>G			TGCAGTAGCTAGGAGCAGTGGCGGCAGCGCTAGTAGCAGGCATCAGAAGCAAGCAGCAGCGCAGCAGCA	51:A>G	0.27	0.32	47	14	137	198	2	0.4	0.07
100029863|F|0--30:C>G	chr1R	540311419	TGCAGTAGCTGCATGACTACGTGCGTACGGCCGCGTTGCTGTCTCACCTGAACTGAATCAATCCCTGAT	30:C>G	0.28	0.32	51	16	147	214	2	0.4	0.07
100035894|F|0--31:C>T	chr1R	555653065	TGCAGTAGGAAGGGTGGTGGATAGGCAAGTGCAAGCTGCAAGATCTGTTCGAGACCAGTTGTGATGTCA	31:C>T	0.46	0.37	85	12	101	198	2	0.5	0.06
100014851|F|0--37:G>A	chr7R	102634984	TGCAGTAGGAGTGGTGTGAGGAAATAAGGTGAGGCGCGGCACAGACTTTAAACAGCAATCCTTCAGTTA	37:G>A	0.08	0.14	153	21	4	178	2	0.15	0.12
100015497|F|0--26:G>C			TGCAGTAGGCCGCCTAGGGTCGCTCAGCCGCTCGCCGCACAGGACGCAGCACTCCTCCTGCTGTTTCCC	26:G>C	0.19	0.26	140	10	30	180	2	0.31	0.06
100000957|F|0--21:A>G			TGCAGTAGGCTCCAGTTGCCGATACTCCTGCCAATTCGATTGCAAAGCCAATGAATTTCACCGAGATCG	21:A>G	0.36	0.36	58	13	106	177	2	0.46	0.07
100004359|F|0--10:T>C	chr3R	781831330	TGCAGTAGGCTGCGCGCTCGTGAGTCCGACGCAGTTGTTGACCCATGACTCATGACTAGGAACATGGAC	10:T>C	0.12	0.19	180	9	21	210	2	0.21	0.04
100004359|F|0--21:G>C	chr3R	781831330	TGCAGTAGGCTGCGCGCTCGTGAGTCCGACGCAGTTGTTGACCCATGACTCATGACTAGGAACATGGAC	21:G>C	0.07	0.12	180	13	8	201	2	0.13	0.06
100001238|F|0--32:C>A			TGCAGTAGGGAAAATATCTGGTGATACAACTTCTTAGGAGATACAATGCTCCGAGATCGGAAGAGCGGT	32:C>A	0.3	0.33	119	7	48	174	2	0.42	0.04
100005792|F|0--45:A>G			TGCAGTAGTAAGTAGGATCATGCATGCACAGACAGGGATCAGCTGACTTGCCGAGATCGGAAGAGCGGT	45:A>G	0.45	0.37	73	31	94	198	2	0.49	0.16
100005594|F|0--25:A>G			TGCAGTAGTACCTGTACATGTACACATCTTTGTCGGGACTGAGCTCCCTCCGAGATCGGAAGAGCGGTT	25:A>G	0.27	0.32	47	23	144	214	2	0.4	0.11
100029466|F|0--20:C>T	chr2R	754908958	TGCAGTAGTAGATCATCTTGCCGACCACCACGAATCGTGTTCTGTGAAAACGACAACGTCGGCCAAAGA	20:C>T	0.11	0.18	17	10	165	192	2	0.2	0.05
100000630|F|0--20:A>T	chr4R	809932919	TGCAGTAGTAGATGTGGTGTAGACTTACAAATCGTATCAACAAATTGTATCAACAAGCCATCCTTGACA	20:A>T	0.1	0.16	15	10	183	208	2	0.17	0.05
100007198|F|0--14:A>G	chr3R	736603144	TGCAGTATATACGGAGCAGTTAGTTGTCCCAAGACCCTCATGAACTCCCGCGTAACTTCTTTGTTCCCT	14:A>G	0.44	0.37	100	20	78	198	2	0.49	0.1
100117450|F|0--29:T>G			TGCAGTATCACGGGGGAGGCCAGGTGGAATACGCCGTGGACGCCGTCGACCGCCGAGATCGGAAGAGCG	29:T>G	0.49	0.37	93	8	97	198	2	0.5	0.04
100016173|F|0--25:C>T	chr4R	75289203	TGCAGTATCCTAGCCTGTTGCTGGACTTCATGGGGAGCTATCTCACCGAGCTGAGCCTTTTGGATTATG	25:C>T	0.06	0.1	4	15	188	207	2	0.1	0.07
100016173|F|0--49:G>A	chr4R	75289203	TGCAGTATCCTAGCCTGTTGCTGGACTTCATGGGGAGCTATCTCACCGAGCTGAGCCTTTTGGATTATG	49:G>A	0.07	0.12	183	19	5	207	2	0.13	0.09
100038588|F|0--26:G>T			TGCAGTATCCTCCTGAGGTCGTCGGCGCGCACGAAGCCGAGATCGGAAGAGCGGTTCAGCAGGAATGCC	26:G>T	0.3	0.33	51	16	131	198	2	0.42	0.08
100030398|F|0--40:A>T	chr5R	807173168	TGCAGTATGAAGAGGTGAAGTTCAAGGCATTCGATTTGGCATCGAAGCCTGAAGGTGAGGGCACCCCGA	40:A>T	0.47	0.37	81	12	93	186	2	0.5	0.06
100001621|F|0--16:C>G			TGCAGTATTCACGTAGCGATGAGATCGCTTACTGTGCATTTTTCAACTTCTTTTTAATGCCCCGAGATC	16:C>G	0.07	0.12	6	16	191	213	2	0.12	0.08
100012789|F|0--40:T>C	chr3R	747335892	TGCAGTATTGATGCATATGTGTGCCATCTACTTATCTTCCTCCTGAAAGGCTTGACATTGCGCCAAAGC	40:T>C	0.12	0.19	148	7	18	173	2	0.22	0.04
100027491|F|0--9:A>T	chr6R	459453432	TGCAGTCAAATTTTTAGAGGATTAACTGTAGTGTTAACTTCGCAAGAAAAGGGGCTGAAACCCTCGCAG	9:A>T	0.21	0.28	33	7	134	174	2	0.33	0.04
100007578|F|0--50:A>G	chr6R	696432621	TGCAGTCAACTCTAGCAGGAAATTAATCAACCGTTGGGATCAGTGATTTCACCGTGCCTCTGCTTGTGT	50:A>G	0.08	0.13	5	23	185	213	2	0.14	0.11
100035981|F|0--34:G>A			TGCAGTCAAGGAAGTTCAGGATGCCGGTGCTGCCGCCCAAGATGCCGAGATCGGAAGAGCGGTTCAGCA	34:G>A	0.15	0.22	138	45	6	189	2	0.26	0.24
100037834|F|0--67:T>C	chr2R	851244109	TGCAGTCAAGGCGCGGCAGTCAAGAAGGCGCAACTTCCCCAGCCTCAACCTGTGTTTTGATTTTCGGTT	67:T>C	0.08	0.14	166	9	11	186	2	0.15	0.05
100014500|F|0--61:C>A	chr4R	4467885	TGCAGTCAATTCATGGATGCTCAAGTTAATGTGTAGGTGTAACAAAACTAACCAAGTCAGTCGTGCATG	61:C>A	0.29	0.33	125	19	46	190	2	0.41	0.1
100098428|F|0--51:C>G	chr6R	699149438	TGCAGTCACCTGGCCTTGGCCGCCTCTTCCACCGTGAGTCTCTCGTCCGTCCACCACCGCCGTCGCCGC	51:C>G	0.08	0.14	163	17	7	187	2	0.15	0.09
100069022|F|0--16:A>T	chr7R	281179826	TGCAGTCACTTTTCGCAGGACAACGTCCATCAAGGCTCGCTTCACGTCCTATGAAAAAAGCGCAAAAGC	16:A>T	0.16	0.24	26	18	169	213	2	0.27	0.08
100006299|F|0--23:A>G	chr1R	668847913	TGCAGTCAGTGCTTAATTAGCACAAGCAAGGGAGAAAAGAACAAGGGCCGAGCGGATTGTTGCACTGAC	23:A>G	0.23	0.29	31	25	131	187	2	0.36	0.13
100011083|F|0--31:C>G			TGCAGTCCAACATCTTCATCGAGGGCGTCTCCCACAAGATCCGCCGAGATCGGAAGAGCGGTTCAGCAG	31:C>G	0.34	0.35	62	9	127	198	2	0.45	0.05
100000965|F|0--64:G>C	chr4R	647863366	TGCAGTCCAACCACATCATGTAGTTGTACTTCTATATTGCTCTCACGTGTAGCATGCCATGATGGTCAC	64:G>C	0.36	0.35	123	29	62	214	2	0.46	0.14
100021854|F|0--13:A>C			TGCAGTCCAACCCAGTCTGCCTCTGCCAGCTGCTCGCCGAGATCGGAAGAGCGGTTCAGCAGGAATGCC	13:A>C	0.38	0.36	64	21	113	198	2	0.47	0.11
100067758|F|0--25:G>C	chr4R	831018865	TGCAGTCCAACTTCCTCGTCGGCGAGCTGCCATCGGGTGACATGTTCAAGGGCATGAGGAGCCTCGAGT	25:G>C	0.16	0.23	172	13	27	212	2	0.27	0.06
100035133|F|0--68:A>C	chr7R	567445005	TGCAGTCCAAGGAGGTGTGGGTCGGGGTCACCTACGGCGTGGCCGCCGCCATGGTCCACGAGGGCATGA	68:A>C	0.09	0.15	12	12	170	194	2	0.17	0.06
100015254|F|0--46:G>C	chr1R	110904308	TGCAGTCCACGAGAACATCGCTCGTGGGGAAATCCAGCTCGATGAAGGGCTTCGCCTGCTCCTCCTCCG	46:G>C	0.13	0.2	170	21	16	207	2	0.22	0.1
100004247|F|0--62:A>C	chr1R	610812451	TGCAGTCCAGCCGAGGTCGCGTACACGCTGATCCCGACAATGTGCTACTTCGAGTTCCTCCCAGTCCAG	62:A>C	0.24	0.3	43	6	142	191	2	0.37	0.03
100030061|F|0--32:C>G	chr2R	596502879	TGCAGTCCAGGTACTGGACGACGTTGTAGGTGCCGTTGTTGTATATCTTCACGACGTAGCACGGATCAT	32:C>G	0.47	0.37	102	22	90	214	2	0.5	0.1
100027401|F|0--16:G>C	chr2R	202591139	TGCAGTCCCAGGCCCCGCATTTCCTTCAAAACCTAAGCACAAGCATTTGCCGCCTCGGTGCTCTACCAC	16:G>C	0.1	0.16	171	2	18	191	2	0.18	0.01
100087198|F|0--39:G>C	chr3R	50383495	TGCAGTCCCTCCTATAAAACCCACCCAATCCCCACCCGTGTGAAGCACCCTCCGCCACTTCCCCGTGTT	39:G>C	0.46	0.37	106	18	90	214	2	0.5	0.08
100005944|F|0--19:G>C			TGCAGTCCCTGCCCAGTGGGAACCTCTCCCTGCTCTGCGATGTGCTGGTCCGAGATCGGAAGAGCGGTT	19:G>C	0.09	0.15	185	20	9	214	2	0.16	0.09
100022817|F|0--62:G>C	chr7R	753996503	TGCAGTCCGACATACACAATGAAATGCTGCTTCACATGTCCTGTGTTCAATCAATTCAGCAGGCTGACC	62:G>C	0.2	0.27	140	14	30	184	2	0.32	0.08
100029143|F|0--6:C>G	chr5R	547837045	TGCAGTCCGATTCCGTATCTCCTCCCCATACGGATCCACTAACTCCGCGAGTCTAGCCAAATCAACAGC	6:C>G	0.28	0.32	46	16	134	196	2	0.4	0.08
100086132|F|0--36:T>G	chr4R	115027611	TGCAGTCCTGCTCCTCGCTGGCGTCTTCATCCTCTCTCGCCGCCTCTCTCGCGACCCCGCAGGTTCGTG	36:T>G	0.05	0.1	195	15	4	214	2	0.1	0.07
100016077|F|0--49:A>C	chr6R	8277395	TGCAGTCCTGTCCTGTGGGGAGGTTGAGCTCGCAGTTCTTGTAGCAGAAAGCGTAGCACTGGCAGAACG	49:A>C	0.45	0.37	78	18	97	193	2	0.5	0.09
100016955|F|0--15:G>A	chr6R	759214451	TGCAGTCGAAGCCGCGTCCAAGGTCATTTTTCTACCATCTCACGCGCATCGAGCTTCAGCCTCGTATAA	15:G>A	0.25	0.3	135	17	39	191	2	0.37	0.09
100006063|F|0--64:C>A	chr6R	666492711	TGCAGTCGCGACGACAAGAAGATCAAGATCAAAGAGATGAACCTCTCCTGCATGAAGAACCTCACGTGC	64:C>A	0.17	0.24	139	13	23	175	2	0.28	0.07
100024801|F|0--56:T>G	chr2R	783325884	TGCAGTCGCGCGCCATGATCTCCAGTCCACGGTGGGTTGCTTCCTCTGCACTGTACTCTGGACAGCCGA	56:T>G	0.28	0.32	146	18	50	214	2	0.4	0.08
100009481|F|0--35:T>C	chr4R	102455864	TGCAGTCGCTTTAGCTTGCTTGACACACAACGGCCTAGCCAAGTCAGCTACTGCTAGGGAGTTTGTTCC	35:T>C	0.27	0.32	144	23	47	214	2	0.4	0.11
100056696|F|0--42:G>A	chr5R	426628546	TGCAGTCGGATCCCGCGCTCGCCAAGGAACAAGAGCATGGTGGAGGCGTCTAGCTAGCTTGTTGGTCCC	42:G>A	0.11	0.18	179	20	14	213	2	0.2	0.09
100066096|F|0--40:G>C	chr5R	539109160	TGCAGTCGGCGGCGCGCACCTGGAGCTTCATCTGCGCGGGGAAGTACCCCATCGACCACCCGTACGCGA	40:G>C	0.24	0.3	39	16	143	198	2	0.36	0.08
100066322|F|0--50:A>G			TGCAGTCGTGCCCCTGCCCACCAACCGCGCACAGCAGGCCGGCTGCACACACCGAGATCGGAAGAGCGG	50:A>G	0.36	0.35	63	11	118	192	2	0.46	0.06
100006694|F|0--19:A>G			TGCAGTCGTTCATCTGCCTAACCATCATCACCTTCGTCCCTGTGTACGACCGAGATCGGAAGAGCGGTT	19:A>G	0.19	0.26	23	29	148	200	2	0.3	0.14
100002243|F|0--35:A>T	chr3R	811752127	TGCAGTCTATGGTATTTCTCAAGAAACACAAATGCAATTTTCTTATGGTTGGTTCTGGATCCTTACCGA	35:A>T	0.09	0.15	15	7	181	203	2	0.17	0.03
100021673|F|0--9:A>G	chrUn	523354959	TGCAGTCTCACCAAGTACTTGAGATTTTGCTCTCATTATGAGAACAGGTTGGGGCTGATTGATAATGGA	9:A>G	0.44	0.37	109	13	83	205	2	0.49	0.06
100072873|F|0--63:C>T	chr6R	444923835	TGCAGTCTCCACCACACGGACTTGCCACCATGACGGCGGCTCCTCTTCTATCGTTGACGGATGCGGCGA	63:C>T	0.08	0.13	9	12	177	198	2	0.14	0.06
100005971|F|0--27:G>A	chr3R	106586667	TGCAGTCTCCGTGCAGTGCAGTCCTGCGCCATTATGCATTCTCCTGTTACCACGGAGATGCGCCTAAAC	27:G>A	0.39	0.36	121	15	76	212	2	0.48	0.07
100002452|F|0--13:C>T	chr3R	738555187	TGCAGTCTGCACTCACCTCAACCTGTCTGTGGGGACAGTGAGCTTGCAGTCCTTGAGATGATGGTACAC	13:C>T	0.11	0.18	20	6	180	206	2	0.2	0.03
100056137|F|0--27:A>G			TGCAGTCTGGCGACGACTACTTCGTCGACCAGAGGCCGAGATCGGAAGAGCGGTTCAGCAGGAATGCCG	27:A>G	0.06	0.1	1	18	160	179	2	0.11	0.1
100053520|F|0--12:C>T	chr6R	13513781	TGCAGTCTGTGTCCAGTGAGCGTCCGCATCTCGGGCTAACCCTATCCCCTTCTTGCCGCTCGCTGTTTT	12:C>T	0.25	0.3	44	15	150	209	2	0.37	0.07
100021599|F|0--48:C>A	chr1R	696112467	TGCAGTCTTACCAGAAAAGCAGCAGCGAGCAGTAGTGCAGTACAACAGCCGTATACATTCCACTGTAAC	48:C>A	0.26	0.31	130	3	44	177	2	0.38	0.02
100002375|F|0--42:T>C	chr2R	453323749	TGCAGTCTTCGACAAGATCATGCCCTCTACCTCGGACCTTGCTCGCTCCATCATGGAGGAAACTTGCTC	42:T>C	0.05	0.09	181	14	3	198	2	0.1	0.07
100055621|F|0--26:G>C			TGCAGTGAAAAGGCTAGACAGTGCCTGCCGCAGCTTTGACGGACAGAGCGGGCCGAGATCGGAAGAGCG	26:G>C	0.5	0.37	82	15	83	180	2	0.5	0.08
100052947|F|0--29:C>A	chr1R	392139587	TGCAGTGAAACACGAAAATATCACGAAAGCGCTACACGGAAACTCACCGCCCCCCGCCGTGCCATGCGG	29:C>A	0.45	0.37	110	15	89	214	2	0.5	0.07
100008365|F|0--9:C>T	chr2R	765851583	TGCAGTGAACTCTGATCCTTAACAATGACGAGTAGACAGTAATGATTCTGGTCATGGATCCTCGTATCT	9:C>T	0.11	0.18	19	10	185	214	2	0.2	0.05
100007136|F|0--6:G>A			TGCAGTGAACTGTCATTGATTCACACAGGACGGGCGCACTGAGTGAGTACCTGTCCCGAGATCGGAAGA	6:G>A	0.28	0.32	142	26	46	214	2	0.4	0.12
100004084|F|0--10:C>T	chr1R	115572923	TGCAGTGAAGCCTGAGTCCGACAATGGTGGATTGGGCGAGGGGGATGCTTCCCTGCCATCCCCTGATGC	10:C>T	0.17	0.24	18	25	136	179	2	0.28	0.14
100057448|F|0--62:T>C	chr1R	133009615	TGCAGTGAAGTGCGATGAACTGGGGTGGCTAGGAGCCTAGGAGCGCTCGCGTATATGTAGTGTTCCGTC	62:T>C	0.13	0.21	150	17	16	183	2	0.23	0.09
100042427|F|0--15:A>G	chr6R	495054378	TGCAGTGAATTAATGAATGCAAACGAGATCAGAAACCGTTGCGAGACCACGACGCCGACACCGACACCG	15:A>G	0.09	0.15	5	26	164	195	2	0.17	0.13
100015432|F|0--30:C>A	chr7R	875174620	TGCAGTGACATCCACTACTGGCCACTGCACCTCTGTGCTTTTCTCCGTTGATTTCCTTCGCCGCCCCCT	30:C>A	0.29	0.33	144	16	53	213	2	0.41	0.08
100026964|F|0--11:C>A	chr3R	652963398	TGCAGTGACGCCTAAGCCGTGTTGAAGCAGTCCCAGCTTCGTCTTCGTGAAGTCCTCATACGCCTCTTC	11:C>A	0.43	0.37	101	11	74	186	2	0.49	0.06
100006264|F|0--54:T>C	chr2R	779264586	TGCAGTGACTGATGAATCCGATGATGATGGAAGCTGGCCAACTTGCAAGCATGATAAACCTTGCACCAT	54:T>C	0.08	0.14	177	15	9	201	2	0.15	0.07
100008786|F|0--29:A>G	chr5R	696746540	TGCAGTGACTTATTTCCATAAAAAGAATGAGTAAATCTCTCTCAGAGTGGAAGGGAATAAATTTCCGAT	29:A>G	0.08	0.14	11	8	169	188	2	0.15	0.04
100004369|F|0--15:T>C			TGCAGTGAGCAAGCCTACACGCGATACCATGCTGGCACCGAGATCGGAAGAGCGGTTCAGCAGGAATGC	15:T>C	0.36	0.36	98	25	51	174	2	0.46	0.14
100013011|F|0--37:A>C	chr3R	176623636	TGCAGTGAGCGCCAATAGGCCTCCGCGGCACTAAATGAGCGTAATATGGGAGGGGACATCCTATGTGCC	37:A>C	0.42	0.37	80	9	114	203	2	0.49	0.04
100084239|F|0--41:G>A	chrUn	280765716	TGCAGTGAGCGCCAGCTGCCTTCCGCGGCGTTGAAGGTGTGGAATAGGTGCTCCCATTGTTGCCCCGAG	41:G>A	0.12	0.19	152	6	18	176	2	0.21	0.03
100004614|F|0--38:G>C	chr2R	768977924	TGCAGTGAGGTAGACACTTCTCCAACATGGTAGCCTCTGGGTTGTTCCGAGAAGGAAAATCCTGCCCCG	38:G>C	0.42	0.37	102	9	72	183	2	0.49	0.05
100077124|F|0--27:A>G			TGCAGTGAGTCAGAGTCTGGCGTCCTCATCGGCGACCACCCACCGAGATCGGAAGAGCGGTTCAGCAGG	27:A>G	0.12	0.19	14	19	156	189	2	0.22	0.1
100009089|F|0--36:C>A	chr1R	639549958	TGCAGTGATATCGCGCACCGACACTAAGTCCAAGACCATCCAATTCTTGTGGGAAACCGTGCCGAACCA	36:C>A	0.5	0.37	92	29	91	212	2	0.5	0.14
100034291|F|0--59:A>G	chr3R	252173717	TGCAGTGATATGAATCTCTTCAGTGAATTATTGCTTCTTCATTTTCCCTGCACTGTACAATTTTTGATC	59:A>G	0.48	0.37	92	18	84	194	2	0.5	0.09
100008739|F|0--11:A>G			TGCAGTGATCAAAATGCTTTGTTAACCTGGTTTTGGCTCCCGAGATCGGAAGAGCGGTTCAGCAGGAAT	11:A>G	0.06	0.1	4	17	193	214	2	0.11	0.08
100003459|F|0--33:T>C			TGCAGTGATCAAGCTGTGGTCAGGCGGTAGCAGTCCTGCCGAGATCGGAAGAGCGGTTCAGCAGGAATG	33:T>C	0.36	0.36	121	31	62	214	2	0.46	0.14
100026736|F|0--38:G>A			TGCAGTGATCGATGCACGCCGCTGCCGATCGCCTGTTCGCCCGAGATCGGAAGAGCGGTTCAGCAGGAA	38:G>A	0.2	0.27	142	20	28	190	2	0.32	0.11
100020435|F|0--52:T>C	chr6R	573555412	TGCAGTGATGTCAATTTCGACTTGGGCAAGCTAGCGTCCCTTTGCCTTTTTTTCTGTGATCTTGGCTTC	52:T>C	0.06	0.11	178	8	8	194	2	0.12	0.04
100050632|F|0--44:T>G	chr3R	780939658	TGCAGTGATGTGCTGCCCCCAATCTCTCGTACAGCTCGGGTTTCTAGGCGGAGGCCAAGGGGGAAGAGG	44:T>G	0.32	0.34	128	19	54	201	2	0.43	0.09
100050311|F|0--58:C>A	chr2R	678026429	TGCAGTGATGTGTGTACTACGTGGTTAAGCTTGAGAGTTTGCGTTTTGTTTTGATAGGCTTGGACTGGA	58:C>A	0.19	0.26	145	13	28	186	2	0.3	0.07
100021368|F|0--68:C>T	chr5R	845447402	TGCAGTGATTCAAAGCGTTTGCAACATGCCCTGATGCCCTATGTTGCGACCACAAAAAGTCCCTGTGGC	68:C>T	0.29	0.33	56	5	141	202	2	0.41	0.02
100077581|F|0--33:C>T	chr5R	461522016	TGCAGTGATTTTTGAGAGGACATGGACGGCGTGCTTGGCGATTTCCTTGGAGGTTTGGATGGATATGGG	33:C>T	0.27	0.32	51	14	149	214	2	0.4	0.07
100000143|F|0--40:G>A			TGCAGTGCAACAAAGGTTTGTGAATGCATAGTTCTTTTGCGGAACAAAGTATATCAACCGAGATCGGAA	40:G>A	0.08	0.14	189	15	10	214	2	0.15	0.07
100004079|F|0--52:G>A	chr2R	750917030	TGCAGTGCAACTACACCGCACCACCCTTCCTGCCACTGCCAGCCTTTCGGTTGGGCATGCATGCCACCC	52:G>A	0.48	0.37	80	27	88	195	2	0.5	0.14
100034375|F|0--18:A>G			TGCAGTGCAATCTCCTCCAATGAGACGTTCAGGTTCAGCATCCGGACTGGTCTCCGAGATCGGAAGAGC	18:A>G	0.11	0.17	17	3	155	175	2	0.19	0.02
100002327|F|0--31:G>A	chr2R	918752512	TGCAGTGCAATCTGACCTTCCTTTCCAGCCAGCCTTGTGTGTAAACGAGGCCGTCCGTGCCTCAACATT	31:G>A	0.27	0.32	130	16	44	190	2	0.4	0.08
100036276|F|0--38:A>G			TGCAGTGCACAACAGCGGGTGACTGAGTCTCTGAATTCAGAGACCTGGTGCCGAGATCGGAAGAGCGGT	38:A>G	0.19	0.26	7	64	137	208	2	0.3	0.31
100004316|F|0--38:T>A	chr2R	122146802	TGCAGTGCACAACTAGGCCTATATCAATCCAACTTCACTTGCGTATGTGTACCTGGACAAAACAGTCGT	38:T>A	0.15	0.22	161	19	21	201	2	0.26	0.09
100004316|F|0--42:G>C	chr2R	122146802	TGCAGTGCACAACTAGGCCTATATCAATCCAACTTCACTTGCGTATGTGTACCTGGACAAAACAGTCGT	42:G>C	0.07	0.13	175	4	12	191	2	0.14	0.02
100005297|F|0--14:G>A	chr1R	536396770	TGCAGTGCACCAGAGTCATATCTCCGCACTGAACAAACTGCCACTAGAACTGCATGCGACTAAAATCAC	14:G>A	0.12	0.19	147	9	17	173	2	0.22	0.05
100024897|F|0--49:A>G	chr3R	808655657	TGCAGTGCACCGCCGCCTCCCGCAGCGCGCACACCGCCAGCGCCAGCACAAAGAAGCCCACGCTCATGC	49:A>G	0.31	0.33	52	17	129	198	2	0.42	0.09
100006753|F|0--44:T>G	chr6R	792917912	TGCAGTGCACTGTACGAGACGGCATCCATCCCTGGTATGTGACCTATCCAGCGCATCCAGTTGACCTTT	44:T>G	0.19	0.26	154	9	33	196	2	0.31	0.05
100005906|F|0--15:T>C	chr2R	851463053	TGCAGTGCAGACCAGTACGTACATTATTAAGGCGGCGTCTCTTGGACTACTACTAGATCCTTCCAGCAG	15:T>C	0.1	0.17	163	6	16	185	2	0.18	0.03
100001014|F|0--24:A>T			TGCAGTGCAGCGTACAAAAGGGCTAATAAGATGGCCCGAGATCGGAAGAGCGGTTCAGCAGGAATGCCG	24:A>T	0.26	0.31	46	9	143	198	2	0.38	0.05
100006768|F|0--30:T>G			TGCAGTGCAGCTGCTATTTACTGCATGCAGTATACAGGAAGACCGAGATCGGAAGAGCGGTTCAGCAGG	30:T>G	0.41	0.37	105	12	71	188	2	0.48	0.06
100027372|F|0--13:G>T	chr1R	556632669	TGCAGTGCAGGTAGATCGATACCAGCAGGAGATCTTCACGTCGGTTACGATGTGACAAAAAAACATCTG	13:G>T	0.07	0.13	10	11	189	210	2	0.14	0.05
100012233|F|0--61:C>T	chr2R	938146710	TGCAGTGCATGCATGACAACGTATCGGTCGGTCAATGATGATCATGACGATGTGTAGTTGCCTCCCGAC	61:C>T	0.19	0.26	30	8	140	178	2	0.31	0.04
100025844|F|0--27:T>G	chr3R	913225513	TGCAGTGCCACGACTTACTTCTTGATATGGTCTTTTATGCTAACGATTTTTGTAAAGTAAAACATTTTT	27:T>G	0.16	0.23	147	11	24	182	2	0.27	0.06
100059673|F|0--13:G>C			TGCAGTGCCATGGGGCCAACGACGCGTCGAGCGACGCGCTCTCCGAGATCGGAAGAGCGGTTCAGCAGG	13:G>C	0.26	0.31	152	14	48	214	2	0.38	0.07
100050415|F|0--64:C>G	chr5R	498695902	TGCAGTGCCCCATCGCGACGCACGCGCGCCATGTTCGCTCGCTCATCCATCGTGGAACGTGGATCCGCA	64:C>G	0.24	0.3	140	11	41	192	2	0.37	0.06
100059336|F|0--59:T>G			TGCAGTGCCGGTCCCAGTCGTCGGAGGTGCACGTGCCCAAGCCCAAGGCCAGCTCCAGCTCCGAGATCG	59:T>G	0.31	0.34	115	14	48	177	2	0.43	0.08
100032842|F|0--5:T>C	chr7R	836480001	TGCAGTGCGAAGAGCCCCACCAGCACGACGCACGCGAGCAGCACCGTGTAGTCTGCGACCCATGAGACG	5:T>C	0.37	0.36	62	12	111	185	2	0.46	0.06
100044695|F|0--65:C>T	chr2R	606919037	TGCAGTGCGAGGGCCTCGTCATCGGGGCACTCGGCGCTGGCGTTGTACGTCATGTACTGCGTGAGCTCC	65:C>T	0.12	0.19	22	2	165	189	2	0.21	0.01
100037295|F|0--62:A>G	chr6R	767036659	TGCAGTGCGATGACAAGCACCTGGTGTGCTCGACCTGCCGCGGCGTTCATGGTAAGGCGTGCAGTCGCC	62:A>G	0.06	0.1	5	13	179	197	2	0.11	0.07
100075452|F|0--42:A>G	chr1R	615279058	TGCAGTGCGCCGCGGATGAAGCTGAAACCGTCGACGGCGAGGACACAGACTACTGCGAGCGGCCGACGA	42:A>G	0.12	0.19	14	15	153	182	2	0.21	0.08
100075452|F|0--61:G>A	chr1R	615279058	TGCAGTGCGCCGCGGATGAAGCTGAAACCGTCGACGGCGAGGACACAGACTACTGCGAGCGGCCGACGA	61:G>A	0.29	0.32	139	12	52	203	2	0.41	0.06
100023924|F|0--43:A>C			TGCAGTGCGCGCCCTGCCTTGACTGCTTCGAGCAGAGCGGGCCAATCTTCGACCCGAGATCGGAAGAGC	43:A>C	0.2	0.27	31	24	155	210	2	0.33	0.11
100010343|F|0--40:T>C			TGCAGTGCGGGTGAATGATATCTTCAGAAGAAAGGCACCATTATATATCCGAGATCGGAAGAGCGGTTC	40:T>C	0.39	0.36	98	20	59	177	2	0.48	0.11
100080775|F|0--60:A>G	chr5R	568110780	TGCAGTGCGTGGCGCGACACCATCGACGCCCGCCTGCGCGCCCACCTGCTCCCGTGCTCGATGCGCGGA	60:A>G	0.14	0.21	165	14	21	200	2	0.24	0.07
100000515|F|0--45:G>A	chr7R	134770750	TGCAGTGCTAAATACTGGAGATCACCTTGTGACTATTCAGAAATAGTTACAGATATAACAGTCCCGAGA	45:G>A	0.47	0.37	58	81	48	187	2	0.5	0.43
100003586|F|0--46:G>C			TGCAGTGCTAAGACAAACCTCCATGGGCCAATGTTTTACCTATGATGACCGAGATCGGAAGAGCGGTTC	46:G>C	0.08	0.14	182	16	9	207	2	0.15	0.08
100019671|F|0--28:G>C			TGCAGTGCTGCATATGGTGGTGAGCAAAGTAATTTGGGGGCGTGCCTGCTCCGAGATCGGAAGAGCGGT	28:G>C	0.2	0.27	166	9	39	214	2	0.32	0.04
100018704|F|0--48:C>G	chr6R	619785991	TGCAGTGCTGCCTGCACAAGACATGCTTGGAGGAGCAGCGAAGACAGGCCAGAGATTGAGGCAAACCAA	48:C>G	0.24	0.3	38	10	129	177	2	0.37	0.06
100003644|F|0--29:A>G	chr1R	562209919	TGCAGTGCTTCCTTGCCTCCATCATGGTGACCATAGCAGACAATGATGGCATTCCAGGATACAGAGTTC	29:A>G	0.31	0.34	137	21	55	213	2	0.43	0.1
100022606|F|0--28:C>T	chr6R	560350598	TGCAGTGGAATATCAGGTTTCTTCGGGGCGCGGAACACAAACCCCGTCTCCATTTTTCCAAGCACGTAC	28:C>T	0.17	0.24	24	19	155	198	2	0.28	0.1
100008803|F|0--59:G>A	chr5R	835744220	TGCAGTGGAGATCATGACAGTAAAATATCTTATGTTGACACCCAAGCATGGATCAGACGGCTTAACCTG	59:G>A	0.14	0.21	173	19	20	212	2	0.24	0.09
100020150|F|0--9:G>A	chr7R	10478723	TGCAGTGGAGTTCATGTGGCATGGAGAAATAAACTTACCGCCTCGCAACCAAAATTCAGATACAGTTCC	9:G>A	0.35	0.35	120	13	62	195	2	0.46	0.07
100034040|F|0--47:T>C	chr7R	593485598	TGCAGTGGCATCCTCTGCATGGAGGAGGTGCTGCCGCCTCCAAGCTGTTCCATGAGCTGCTGCTGATAA	47:T>C	0.21	0.28	30	17	136	183	2	0.33	0.09
100029102|F|0--36:G>C	chr6R	659833091	TGCAGTGGCCGACGGGCTGCGGGGCCGTGCTGCTGTGCTCAGAGATGGGAGGCCCCGTTCTAAAGGCGC	36:G>C	0.26	0.31	145	24	44	213	2	0.39	0.11
100039834|F|0--12:G>A	chr6R	799969778	TGCAGTGGCGCCGCATGGTGTCCTCGCTCGCCTCGGAGGGCCGCCTCACCAACTGCATCGCCATGTGCG	12:G>A	0.26	0.31	124	11	40	175	2	0.38	0.06
100017798|F|0--60:T>C	chr3R	875235158	TGCAGTGGCGTCGCTCCTACGAAGAAAGGGAGGCTCTGCTCAGAGACATATGCTGGTAACTGCAACTGA	60:T>C	0.34	0.35	122	10	61	193	2	0.45	0.05
100064836|F|0--8:C>T	chr4R	157169963	TGCAGTGGCGTCTCCTCCTCCACGGCCGCCGCAACGTCTGGCTGCGCCTCGACGACCCTCCCAGGAGGC	8:C>T	0.09	0.14	11	12	175	198	2	0.16	0.06
100004933|F|0--33:A>C			TGCAGTGGCTAAGTTAGGCTACTGTAGCTGGGAATTGGCCCCGCAAAGGCAGCGAATCCGAGATCGGAA	33:A>C	0.16	0.23	21	12	140	173	2	0.26	0.07
100003665|F|0--42:T>G	chr6R	452723028	TGCAGTGGCTCATTAATCAATTCCGCCTGTAGATCTTACACATTTGTTTTTGAGATAATACATGGAGTC	42:T>G	0.44	0.37	86	15	113	214	2	0.49	0.07
100087127|F|0--40:C>G			TGCAGTGGGCGCACGGCTCCCTGAACGCGCTCTCCTGGGGCCTCCTGCTCCCGAGATCGGAAGAGCGGT	40:C>G	0.47	0.37	93	25	80	198	2	0.5	0.13
100051377|F|0--19:C>G	chr5R	540346210	TGCAGTGGGTAGTAGCGCACAAGGCAGGCGCGGGCAGCAGTACAAATGATTGGGTCACTGTGCGGAAAG	19:C>G	0.19	0.26	33	9	152	194	2	0.31	0.05
100063657|F|0--61:G>C	chr1R	471163861	TGCAGTGGGTGAGGGAGAACATGGACCTCAACGCCACCAGGGTCTTCTTCACCAGCATGTCGCCCACCC	61:G>C	0.14	0.21	161	18	19	198	2	0.24	0.09
100027745|F|0--14:A>C	chr3R	171528057	TGCAGTGGGTTGATAACTAGCGCGGGCCACGCAGGGCTCTTCTTCCCCGACCTTGCCCAAACCACGTCG	14:A>C	0.15	0.23	26	9	162	197	2	0.26	0.05
100016351|F|0--16:G>A			TGCAGTGGTCCGACGAGTGCTTGGTGAGCGCGGCGATCTGCGCCGAGATCGGAAGAGCGGTTCAGCAGG	16:G>A	0.19	0.26	148	23	27	198	2	0.31	0.12
100005457|F|0--9:C>T			TGCAGTGGTCGTTCATCTTGATTAATACGAGTAGTATTCAATTTTTGGGTAGATACCGAGATCGGAAGA	9:C>T	0.28	0.32	48	23	142	213	2	0.4	0.11
100065040|F|0--44:A>C	chr3R	208082484	TGCAGTGGTTCGAGGCTCTCAAGCCTTCTCTCTGCCGCACAACCAAAGGTTGGTGTATTCAGCAGCTAG	44:A>C	0.45	0.37	76	33	97	206	2	0.49	0.16
100040533|F|0--9:A>C	chr2R	845495966	TGCAGTGTAAACGACCAACAAGTTGTATGTCGCCGCCATTCCAAAGATTCCTACCATCCCGCATGCCAT	9:A>C	0.42	0.37	75	14	105	194	2	0.49	0.07
100028616|F|0--58:C>T	chr2R	4009185	TGCAGTGTAGTTGTCATGACTGAAGCCGTCGAAACGGAATGGGGGACATTTCCTCCGCCTCCACCCGTC	58:C>T	0.44	0.37	77	14	100	191	2	0.49	0.07
100009019|F|0--11:T>C			TGCAGTGTATGTATGGGATACGTACAGGAGAGGATGAGGCGCCGAGATCGGAAGAGCGGTTCAGCAGGA	11:T>C	0.22	0.29	146	41	27	214	2	0.35	0.19
100020242|F|0--65:G>A	chr2R	554982372	TGCAGTGTCAAAGCACCGCCGATCACCTACCTTAGCCCCCCCTATCCCCGCAGGCCCTTACTCGAGCTG	65:G>A	0.06	0.1	194	15	5	214	2	0.11	0.07
100002718|F|0--25:C>G			TGCAGTGTCCCCGCGTGAGCCTCTCCAGCAAAGGGCATTCCTCTCATCTAGCCCGAGATCGGAAGAGCG	25:C>G	0.33	0.35	68	7	139	214	2	0.44	0.03
100003267|F|0--62:G>T	chr5R	860803861	TGCAGTGTCCCTCGTGTCAATATTTACCTCTCCCTTTGCAGTACGTACACACACCATAACTTGTCCGTG	62:G>T	0.2	0.27	33	18	163	214	2	0.32	0.08
100007320|F|0--37:T>G	chr6R	469263358	TGCAGTGTGATATTCTGGAGGAATCTTGCTGACTGATTTCCTGTGCGATGCTCAATGTGCAGGTGAAAA	37:T>G	0.14	0.21	181	6	26	213	2	0.24	0.03
100011510|F|0--35:C>G			TGCAGTGTGTGTGCGTATACAATACACAGGGGTCTCCGCAGCGCCTAGGGCCCCGAGATCGGAAGAGCG	35:C>G	0.2	0.27	26	28	143	197	2	0.32	0.14
100001438|F|0--10:C>G			TGCAGTGTTACTGTACAAACGAATGGGATCTGGAAATGCCCCGAGATCGGAAGAGCGGTTCAGCAGGAA	10:C>G	0.12	0.19	22	2	160	184	2	0.22	0.01
100001997|F|0--8:T>G			TGCAGTGTTATTGCAGTTGCAGGGAAAAGAACGGGCCTCAGTTCTCCGAGATCGGAAGAGCGGTTCAGC	8:T>G	0.09	0.15	183	22	8	213	2	0.16	0.1
100018168|F|0--17:T>C			TGCAGTGTTGCAACACGTAGGGAACATGGCCTATCCCATCCTCTCCCGAGATCGGAAGAGCGGTTCAGC	17:T>C	0.42	0.37	94	23	64	181	2	0.49	0.13
100031810|F|0--15:G>C	chr4R	642770697	TGCAGTGTTGTCGGTGCGCGATGCCGTTTACCTCGGCCCCTCCACGCTCCTCGTCGGCGGCTTGGGCAT	15:G>C	0.07	0.12	190	19	5	214	2	0.13	0.09
100004133|F|0--59:G>A	chr2R	24937617	TGCAGTTAAAACGCAAAGCCAAATCATGGTCATGTTCAGGAGATCAAGAAATGCTCGAGGATTCGCTCA	59:G>A	0.28	0.32	140	18	50	208	2	0.41	0.09
100017155|F|0--10:A>T	chr1R	572337322	TGCAGTTAACATCCCTTTCCTTCCCGCCGTTTTTCTGCACGCATTTGCGGATTTTCTCCAGTAACCGAG	10:A>T	0.1	0.17	182	16	14	212	2	0.19	0.08
100004271|F|0--67:G>A			TGCAGTTAATTGGTTTCACTCCACTAATAAAATGACTCGTGGTTTCACGTCATCAATGGCATCAGCGGA	67:G>A	0.11	0.18	150	10	15	175	2	0.2	0.06
100001843|F|0--18:T>G			TGCAGTTACAGAATCTACTATCGGACTTTGCAAATCCGAGATCGGAAGAGCGGTTCAGCAGGAATGCCG	18:T>G	0.08	0.13	169	14	8	191	2	0.14	0.07
100027027|F|0--50:G>T	chr4R	624221620	TGCAGTTACATCGATTGGACCCTGAGTGAACCAAGAGGGCCAGAGAATTAGAGAACAAGCTAGCGGCGT	50:G>T	0.43	0.37	73	12	100	185	2	0.49	0.06
100076697|F|0--5:T>A	chr3R	762776718	TGCAGTTACCCAGGCACAGCTGCCTGCACTCGGCCAGAGTCATGTCGGGGCGCACCGTCGCTTCCGTCG	5:T>A	0.24	0.3	155	11	44	210	2	0.36	0.05
100034833|F|0--42:G>C	chr5R	772121705	TGCAGTTACGGCCACGCCTCGCTGTCGTTCCTGGGCGTGCACGCTCTTGTGCATGGCTACATGGCCAAT	42:G>C	0.47	0.37	91	9	80	180	2	0.5	0.05
100002978|F|0--42:A>C			TGCAGTTAGTTCGTTTAGGGATTATTAGGGTTGAGAGGTGCTACTCCGAGATCGGAAGAGCGGTTCAGC	42:A>C	0.4	0.37	116	23	75	214	2	0.48	0.11
100023806|F|0--24:T>G			TGCAGTTATCTAAAGCCAGCTTCATGTCTTTTGAGGCAGATGGGGCCGAGATCGGAAGAGCGGTTCAGC	24:T>G	0.43	0.37	107	24	79	210	2	0.49	0.11
100005829|F|0--33:A>C	chr1R	59592184	TGCAGTTATGATGGGTTCTTCATCTTGGTCTACACCCCCACCAGCCTTTGGATCAGTCATGGGCTCTTC	33:A>C	0.24	0.3	41	14	142	197	2	0.37	0.07
100008956|F|0--58:T>G	chr6R	626212867	TGCAGTTATTAGATGTGTGTGAATGTGTGTGATGTGTATATTATCATAAAAGGACCAATAAACCTAACC	58:T>G	0.07	0.12	188	17	6	211	2	0.13	0.08
100025599|F|0--12:A>G			TGCAGTTATTTCACAGATAAAGCAATTCATCATGATCTGTACAGTTTGTGGCAGATACAGCATGATCTG	12:A>G	0.2	0.27	35	8	154	197	2	0.32	0.04
100001981|F|0--9:A>C			TGCAGTTCAAGTTCAAATTTACAAATACATTATTAAGAACGTCCGAGATCGGAAGAGCGGTTCAGCAGG	9:A>C	0.1	0.16	11	19	184	214	2	0.17	0.09
100017010|F|0--68:T>G	chr2R	829699763	TGCAGTTCAGGTAGATAACCACATGATGTCAAAGTCGCAGGTTGGTTAGAAACTTGGAATGATTTGACT	68:T>G	0.26	0.31	130	14	41	185	2	0.38	0.08
100060830|F|0--33:C>G			TGCAGTTCATCCGCCGCCGGGATTGAGCCTGCTCCCCGCGCCGCCGAGATCGGAAGAGCGGTTCAGCAG	33:C>G	0.13	0.2	19	10	155	184	2	0.23	0.05
100004264|F|0--38:G>A	chr2R	607730265	TGCAGTTCATTGTGAGAAGTGAGCTCTCACCGTAGCGCGATCCTCTGCTGGTCATAGACCACCCGAGAT	38:G>A	0.32	0.34	118	22	51	191	2	0.44	0.12
100033505|F|0--13:G>C	chr1R	35169625	TGCAGTTCCACGGGTTCCACGGCGTGAAGCAGGAGGAGAAGAAGCTGGGCCAGAAGTTCACCGTCGACG	13:G>C	0.48	0.37	89	8	95	192	2	0.5	0.04
100037391|F|0--18:T>C	chrUn	332148246	TGCAGTTCCACTGCATCCTCTCCTCCAGCGTCACATCTAGCCCCTACCGACTCCAGCCGCCGCGCTCCC	18:T>C	0.14	0.22	18	25	169	212	2	0.25	0.12
100010554|F|0--15:T>A			TGCAGTTCCCAGAAGTATCTGTACTGAATTCTTTCTACATAGTGTGATGGTGGCAGTTCCGAAGTGTTG	15:T>A	0.16	0.23	146	6	25	177	2	0.27	0.03
100008619|F|0--61:G>C	chr3R	642779001	TGCAGTTCCCAGCTGAAGCGACGAAGCGAGGCACGGTAATTGAAGCAATGAGATCTCGTACGTATGTAC	61:G>C	0.39	0.36	120	19	75	214	2	0.48	0.09
100038102|F|0--34:T>C	chr5R	23330122	TGCAGTTCCCCTTATAAATGGAGGGAGTAGTTAATAGAAGTTGATCAGTTATGAAGTTGGATGCGTGCA	34:T>C	0.13	0.2	173	9	21	203	2	0.22	0.04
100053510|F|0--28:G>C	chr1R	626728068	TGCAGTTCCTCACCAACTCCTGCGTCGTGCTCTTCATGATCCAGAGCGTCGACCGCCTCGTCCTCTGCC	28:G>C	0.24	0.3	144	11	43	198	2	0.37	0.06
100010231|F|0--60:G>C	chr4R	97809715	TGCAGTTCGACAGGTACAGATACGTCAGGTTCTTGAGGTTCCCAATGCTCGGAGGCATCTGCCCTTGAT	60:G>C	0.28	0.32	142	10	51	203	2	0.4	0.05
100024690|F|0--19:C>A			TGCAGTTCGGCAAGGTGTCCAAGGACACCTTCACCATGGACTACCGAGATCGGAAGAGCGGTTCAGCAG	19:C>A	0.06	0.11	170	10	7	187	2	0.12	0.05
100004626|F|0--47:C>T	chr2R	255094363	TGCAGTTCGGTCCCTGTCATTTGCTACTTGTTTGACCACACTGACTTCTCTGTGAAGCATTCAACAGTC	47:C>T	0.24	0.3	37	27	150	214	2	0.36	0.13
100007468|F|0--67:T>G	chr3R	826965508	TGCAGTTCGGTGATCATAGCAGCCTTCGGCCAACAATGGAAACAGCTCCTAAATTGAATTTGAAACCTC	67:T>G	0.17	0.24	165	23	24	212	2	0.28	0.11
100010617|F|0--19:C>A			TGCAGTTCGTAGAGATGACCAAGGCGCTATGTTCGTTTGTCGGTCATTGGTTATGAGATCTGCATTTGA	19:C>A	0.24	0.3	149	17	40	206	2	0.36	0.08
100010861|F|0--10:G>C	chr2R	224573492	TGCAGTTCGTGGACGAAAAGGATGGCATGCTGGACCTCATTCATCAGTTTATAGTTCTCAGATCTGATA	10:G>C	0.08	0.14	176	14	9	199	2	0.15	0.07
100084189|F|0--58:C>G	chr6R	735814869	TGCAGTTCTACTTCGGGTGGTAGCGACCTCATTGTGTTGGGCCTGAAGCGGGAACGGACGCCGCGACCA	58:C>G	0.31	0.34	57	19	137	213	2	0.43	0.09
100006870|F|0--33:C>G			TGCAGTTCTCGGTGTCGCCTTGGCCCTGTACATCGATCGCCGCCTCAAGATGGAGAACCGAGATCGGAA	33:C>G	0.24	0.3	134	21	35	190	2	0.36	0.11
100001058|F|0--30:C>G			TGCAGTTCTGGTCTCCAGATCGAGATCCACCACGCTTTCAGACCCTGCAAGTAGTGCCGAGATCGGAAG	30:C>G	0.38	0.36	69	25	120	214	2	0.47	0.12
100021406|F|0--34:T>C	chr6R	835483453	TGCAGTTCTTAATCTCATTAAGCAAGACCTCCTTTATCTCCAACCCACTACTTCTGCTCTGTGGCTCTC	34:T>C	0.28	0.32	123	12	45	180	2	0.41	0.07
100055200|F|0--66:C>T	chr4R	151067992	TGCAGTTCTTCCTGACCTGTCCGCTGGACCCCGTCAGCGGCGTGATGTCCCCCATCTTGATCATCCCCA	66:C>T	0.07	0.13	9	11	178	198	2	0.14	0.06
100001609|F|0--21:A>G	chr2R	841916555	TGCAGTTCTTGCATAGCAAACATGACAAGACAATTCGATCTTACCAGTCTATTCACTGTAGTATTTTTG	21:A>G	0.13	0.2	15	24	174	213	2	0.22	0.11
100002951|F|0--32:A>G			TGCAGTTGAGTTGGTTACCCATGCAAATGATTATATGGGCCCGAGATCGGAAGAGCGGTTCAGCAGGAA	32:A>G	0.26	0.31	45	23	146	214	2	0.39	0.11
100019669|F|0--66:A>G	chr4R	473682415	TGCAGTTGATGTTGAGCCACCACCACCAGCCACCAGGTTAATGAATCTATTTCGTTTTACCCTTTTATT	66:A>G	0.09	0.15	12	10	175	197	2	0.16	0.05
100054245|F|0--65:T>G	chr5R	562097219	TGCAGTTGCACCACAAACAGCAGCACGCGGGACGGCGGCTCTTCGCGGACCTGAACTCCAAGGCGTCCG	65:T>G	0.35	0.35	124	20	62	206	2	0.45	0.1
100089648|F|0--13:A>G	chr4R	512447514	TGCAGTTGCAGCCAAGCAAGCACAGCAGCGTCGTCGACGTCGACCGAGCCGCACTCCATGGCTGCCGTG	13:A>G	0.33	0.34	57	26	130	213	2	0.44	0.12
100006329|F|0--49:T>A			TGCAGTTGCCCATGTCTATGTTGGCCGAGCCCTTCCTTTCCGATTATCTTACCCGAGATCGGAAGAGCG	49:T>A	0.35	0.35	130	7	69	206	2	0.46	0.03
100061796|F|0--18:A>G	chrUn	63206474	TGCAGTTGCCGAGGTACAAGGACTGGAAGGTCGCCTGACGCTTCTGGATGACCACACGTACGCTTAGGT	18:A>G	0.26	0.31	40	24	138	202	2	0.38	0.12
100058568|F|0--60:T>C	chrUn	63461120	TGCAGTTGCCGAGGTACAGGGACTGGAAGTTGGCCTGACTGTTTCGGATGACAACACGTATGCTGAGGT	60:T>C	0.09	0.15	155	27	3	185	2	0.16	0.15
100012252|F|0--54:C>T	chr6R	451187432	TGCAGTTGCCTCTGGTTTTATCTGTGGAGATGGTATATGGATGTTCCCTTCTTCCTTGCTCTCCCTTGC	54:C>T	0.25	0.3	40	17	140	197	2	0.37	0.09
100013314|F|0--5:T>C			TGCAGTTGCTCCCCAACCGCGCCACCTCCATCCGCCTCCCCACCGAGATCGGAAGAGCGGTTCAGCAGG	5:T>C	0.07	0.13	166	11	8	185	2	0.14	0.06
100079015|F|0--5:T>C			TGCAGTTGCTGATGCGGCACTTCGCGACGTGCGCGAGAAAGGCCGCGCCGAGATCGGAAGAGCGGTTCA	5:T>C	0.37	0.36	106	30	57	193	2	0.47	0.16
100041513|F|0--46:A>G			TGCAGTTGGACGACCAGCCGTCGTTCTCCATGGCCATCGCGGCGCCACTGTTGCCTGAGCTCCGAGATC	46:A>G	0.34	0.35	35	59	96	190	2	0.45	0.31
100011803|F|0--44:T>G	chr4R	66932881	TGCAGTTGGACGTGGGCTCTCATAGGGAACTATTTCATTTCCTGTTGCATACAATAAATAAAAGAAATT	44:T>G	0.33	0.34	112	18	50	180	2	0.44	0.1
100016163|F|0--43:T>C	chr5R	514407328	TGCAGTTGGACTCGGCCCACCACAGCCGAGCCAGTAGATCCGCTGTCAGGTCAGGTTGGGGCCAGCATC	43:T>C	0.13	0.2	156	30	10	196	2	0.22	0.15
100008441|F|0--42:T>C	chr1R	598580994	TGCAGTTGGAGATTTGAACCATCTGATCTCTGCCACCATGAGTGGAGTGACCTGCTGCCTGAGGTTCCC	42:T>C	0.46	0.37	101	28	85	214	2	0.5	0.13
100019986|F|0--21:A>G	chr5R	548128458	TGCAGTTGGCAAGCTGTCATCAAATCAAGTGTCCAAGCCTGCGTGAGCATGTGAATACAAAACGGAAAG	21:A>G	0.32	0.34	53	13	121	187	2	0.43	0.07
100005511|F|0--14:C>T	chr6R	759085859	TGCAGTTGGGAACACCCAGAGTTGTTCAGAGTCTCTATTGCTCGTCTCTGGTATGCAAACAAGAACCTG	14:C>T	0.27	0.32	49	8	141	198	2	0.39	0.04
100018684|F|0--56:G>T	chr2R	920999308	TGCAGTTGGGCAGCACGACCCTGCTGTTGAGCTCCATGCAGATCCCGCACTCCTCCGCTATCTCGGCGT	56:G>T	0.16	0.24	28	13	171	212	2	0.27	0.06
100011279|F|0--61:C>T	chr2R	639262126	TGCAGTTGGTGGCCAGTACTTTTGTTTAGAATTGGGAATTGTGGGGATGTGGACAATCTGACACCAACA	61:C>T	0.39	0.36	121	19	73	213	2	0.47	0.09
100016421|F|0--53:G>A	chr2R	844950159	TGCAGTTGGTTCCTCCGAATCTACCAAGAGAAATCACCACTGAAGAAAAAAAAGAGAGAAAGAAAGCCA	53:G>A	0.11	0.18	162	9	16	187	2	0.2	0.05
100073506|F|0--45:A>G	chr3R	961144347	TGCAGTTGTGCATAAATGTAACGAAACACGTGTCGTGCAATTGCCAAAATAGGCTTCAACAGGTGAGAC	45:A>G	0.48	0.37	74	25	83	182	2	0.5	0.14
100005556|F|0--56:G>A	chr5R	694154903	TGCAGTTGTTGGAAATTCTCATCCAGCATGCCCTAGATGGATCCCATCATGAGAAGGCAAAGATAAACT	56:G>A	0.44	0.37	100	15	76	191	2	0.49	0.08
100005204|F|0--60:T>C	chr4R	147578854	TGCAGTTTATGCGGATTGTATTGATCTGGTGACGGAAATAGCACAGTTTAGTACTCGCACTGTCTCCGA	60:T>C	0.44	0.37	92	11	71	174	2	0.49	0.06
100008596|F|0--17:C>T	chr6R	571967609	TGCAGTTTCCATGTCTCCAGTAGCGTCTAGGTGCATAGTCCGTTGGTAATAATGTTCTAAGGTTGCATT	17:C>T	0.18	0.25	26	11	137	174	2	0.3	0.06
100012405|F|0--51:C>T	chr2R	690004436	TGCAGTTTCCTCTTCCTAGCAGTCGCTCTCATTTCGAATGCATTATTTGCCCCACCCGTTTCTACAGTC	51:C>T	0.48	0.37	92	22	99	213	2	0.5	0.1
100041782|F|0--16:C>G			TGCAGTTTCCTTGGCCCATGAAGCACCCCCACAAAGCGCTCCGAGATCGGAAGAGCGGTTCAGCAGGAA	16:C>G	0.19	0.26	28	14	138	180	2	0.31	0.08
100017228|F|0--38:T>G	chr2R	588175613	TGCAGTTTCTCTCTAGTTACAGTTTCTTCCATATATTTTTGCAGATTGGCTGGGTCTATGGATCAATGA	38:T>G	0.2	0.27	164	15	35	214	2	0.32	0.07
100006321|F|0--19:C>T	chr6R	873335237	TGCAGTTTCTGAAACTCTGCCACGGTCGAACCTGCTCTGCTCTGCCTGACGAGAGCCAAATAACTTGGT	19:C>T	0.44	0.37	79	23	105	207	2	0.49	0.11
100004757|F|0--26:A>C	chr7R	191873409	TGCAGTTTCTGCTGCTTATTTTCTTCAGTAGCTAAATAAGTTCAGTTCAGTTACATGTGTTGTCGTACA	26:A>C	0.29	0.33	42	33	127	202	2	0.41	0.16
100015908|F|0--58:G>A	chr3R	651396473	TGCAGTTTGCTCACCTCACCTACTTAATTCCTTTGTTTGGACGTAAGGGAACCTAGCAGCTAAGTTCGT	58:G>A	0.16	0.23	144	9	24	177	2	0.27	0.05
100004266|F|0--16:A>G			TGCAGTTTGCTCTAGCAATCGTTAGCGAAAGGTTGGAAACATCCTAGGCCGAGATCGGAAGAGCGGTTC	16:A>G	0.26	0.31	7	87	104	198	2	0.38	0.44
100004266|F|0--19:C>T			TGCAGTTTGCTCTAGCAATCGTTAGCGAAAGGTTGGAAACATCCTAGGCCGAGATCGGAAGAGCGGTTC	19:C>T	0.18	0.25	7	60	137	204	2	0.3	0.29
100000276|F|0--9:G>C			TGCAGTTTGGTCATCTTGTCCAGTAAAGAGCTTCCTTTGACCCAATTTTCAACACCGAGATCGGAAGAG	9:G>C	0.05	0.09	185	10	5	200	2	0.1	0.05
100036597|F|0--25:C>T	chr7R	49102320	TGCAGTTTTACAAAGAGTGCGAGATCGCGGGGACAGTGGACTTCATCTGGGGGACTGCCACAGCAGTCT	25:C>T	0.18	0.25	10	56	148	214	2	0.29	0.26
100005783|F|0--18:G>A			TGCAGTTTTAGGTCAGGCGGAATGTATTTTCAAGTGATTGATTTATAAACATTTATCCCGAGATCGGAA	18:G>A	0.09	0.16	151	15	9	175	2	0.17	0.09
100040326|F|0--27:G>A	chr4R	474174865	TGCAGTTTTGAAAATTTGTAATTGGCTGAATTGGTTTTTACTTTTCGCCGCTGTAGTAGTTTATTTAAA	27:G>A	0.09	0.15	176	8	13	197	2	0.16	0.04
100005004|F|0--65:T>A	chr2R	867677636	TGCAGTTTTGTTTTCTTACTTCTGAGTTCAAGATCTGATCTGGAGCTTGTTTTTCTCAAAATGCCTCCG	65:T>A	0.09	0.15	171	10	12	193	2	0.16	0.05
100004308|F|0--34:G>A	chr2R	151871472	TGCAGAAAAAGAAACGAAACGGAAAAGATGCATTGGATTAAACGACCATTAATTGGCTCCTTGGATCAC	34:G>A	0.18	0.25	164	20	29	213	2	0.3	0.09
100018561|F|0--62:C>T	chr4R	873862355	TGCAGAAAAAGAGAGCAAACAAGGGGAACATTAGCTGTGGATTTTTCTACCTTTTGAACATTCCGTGAA	62:C>T	0.08	0.14	14	2	171	187	2	0.15	0.01
100005562|F|0--64:T>A	chr5R	71993702	TGCAGAAAAAGTGGCCTAGATCCTCGTTATTTTTCTTGTGATCCCCTTCTGTCTTCTTCTGTACTTGGC	64:T>A	0.17	0.24	135	43	10	188	2	0.28	0.23
100023135|F|0--43:T>C			TGCAGAAAAATGGTCCACATCGTTTATGCTTCACAGGGATTTTTGCTACCCGAGATCGGAAGAGCGGTT	43:T>C	0.16	0.24	144	11	24	179	2	0.28	0.06
100012936|F|0--39:C>T	chr3R	64962787	TGCAGAAAACATGGAATGTCTGCTGCACTTGATCTGTTCCGTCTCCTCCGATGTTTATGTGAACTTGAA	39:C>T	0.15	0.22	26	3	155	184	2	0.25	0.02
100002165|F|0--61:A>G	chr5R	805007589	TGCAGAAAAGATTCGATACTGAAAATGACAACTTACACCAACATCTTGCATCATCATGTTGACATAGTA	61:A>G	0.17	0.24	23	12	137	172	2	0.28	0.07
100045307|F|0--54:T>C	chr2R	831007863	TGCAGAAAAGCAGGTAGGGTGGAGGGGAAGCAGGATGTGATGTGAGAGGGATGATGGGCGAACCGAGAT	54:T>C	0.14	0.21	154	24	15	193	2	0.24	0.12
100011491|F|0--28:C>T			TGCAGAAAATCCCGGTGAAGATGTGCCCCAGGAGGCCGAGATCGGAAGAGCGGTTCAGCAGGAATGCCG	28:C>T	0.11	0.18	17	13	184	214	2	0.2	0.06
100004459|F|0--54:C>G	chr6R	518955256	TGCAGAAAATCTTAAAAATATTCCAGACATACAGTAATCTTCGATATATATCGTCATAAATATTCCCGA	54:C>G	0.47	0.37	105	15	92	212	2	0.5	0.07
100074209|F|0--25:G>C			TGCAGAAACCACCAAAACGCCCAGCGGAGGAACCGCGGCCCGAGATCGGAAGAGCGGTTCAGCAGGAAT	25:G>C	0.25	0.3	142	6	45	193	2	0.37	0.03
100038042|F|0--33:C>T	chr5R	815589574	TGCAGAAACGCACGGCAGAACACATCAGTACGGCACAGTACATAACGCGCGTGTGCAATCCGATACAGA	33:C>T	0.07	0.12	9	5	160	174	2	0.12	0.03
100004545|F|0--42:G>C	chr4R	823810219	TGCAGAAACGGTGCACCAATTGACACGGCCCCCACCCCATGAGCCTGTATTGAGATCCAAGACAATATG	42:G>C	0.08	0.14	192	6	14	212	2	0.15	0.03
100039578|F|0--60:A>G	chr3R	88462794	TGCAGAAACTACGTGACCAAGGTAAGTGGCTCGACGTGCAAGAGTTGCAACACTAACATGACCACGCCG	60:A>G	0.26	0.31	38	14	124	176	2	0.38	0.08
100039577|F|0--14:G>A	chr1R	57296142	TGCAGAAACTCTCCGAGTTTAGTGAGCTCCTTCGCCGACGAGACCTCCTCGCCGCAGATATCGATATTG	14:G>A	0.05	0.09	181	2	9	192	2	0.1	0.01
100031889|F|0--57:A>G	chr3R	825550178	TGCAGAAAGCAGATTCCAGTTCAACACAAGCATGCTCCCTTTCCACCTGTGAGCCGCAGGTTATATATG	57:A>G	0.27	0.32	46	14	137	197	2	0.39	0.07
100032315|F|0--64:G>A	chr7R	674961727	TGCAGAAATATTACGGGCACAGTTTTTGGATAACAAACCACGCACAAAACTGCACATTCAGACGGCCAA	64:G>A	0.25	0.3	133	5	42	180	2	0.37	0.03
100042569|F|0--31:A>G	chr7R	586688366	TGCAGAAATCCATGTAGTTGGAGGGGTCCAGAGAGCTGGAGGTCGAGGCGCCGCCGCACGTACGGTCGC	31:A>G	0.07	0.11	0	28	186	214	2	0.12	0.13
100062154|F|0--35:G>A			TGCAGAAATGCGCCCAGGGGGCGGCTGTCCACACCGCAGCGGCACCGAGATCGGAAGAGCGGTTCAGCA	35:G>A	0.32	0.34	112	15	48	175	2	0.43	0.09
100009133|F|0--58:T>C	chr5R	692587215	TGCAGAAATGGAGTCCTCTGGTTCCTCCGTGTCCACCTTCCCCGCTGACAACGACAAGTCCCTGCCGCT	58:T>C	0.33	0.35	52	38	124	214	2	0.44	0.18
100011601|F|0--48:A>G	chr6R	795076974	TGCAGAAATTCATGTGAATAAGGCTGAAATTTTTTATTTCTGAAAATTAAAACAATATCGAGTTAACAC	48:A>G	0.34	0.35	62	5	124	191	2	0.45	0.03
100004210|F|0--38:C>T	chr7R	692374838	TGCAGAAATTCTACTACAGATCTACAATGCTGGCTGGACGCTTGCACAAACTTATACCTACGGCAAGGA	38:C>T	0.12	0.19	21	8	176	205	2	0.21	0.04
100004210|F|0--53:A>G	chr7R	692374838	TGCAGAAATTCTACTACAGATCTACAATGCTGGCTGGACGCTTGCACAAACTTATACCTACGGCAAGGA	53:A>G	0.12	0.19	14	22	164	200	2	0.22	0.11
100008947|F|0--27:T>C			TGCAGAAATTTCCCTACGGGGAACCGATCAAACATGTACGAGCCGAGATCGGAAGAGCGGTTCAGCAGG	27:T>C	0.11	0.18	150	16	12	178	2	0.2	0.09
100010152|F|0--13:C>T	chr5R	440233591	TGCAGAAATTTCTCGTACAAATCCACTATAAAAACCCCTCTATACCCAAGCTATACGTACAAAAGCAAG	13:C>T	0.34	0.35	62	11	124	197	2	0.45	0.06
100067248|F|0--61:A>G	chr6R	592750557	TGCAGAACAAACGGCCACTTCGGGACGGGGACGGTAATTCGGCTACGCCGTCGACGTCGTCATGCACGC	61:A>G	0.11	0.18	168	3	20	191	2	0.2	0.02
100068474|F|0--41:T>C			TGCAGAACAAGAGCGAGTTGCTCCTGAGGTCCAACCCTGCCTACGCCGGCAAGGTGCCGAGATCGGAAG	41:T>C	0.21	0.28	160	4	41	205	2	0.33	0.02
100033623|F|0--39:A>G	chr2R	854388351	TGCAGAACAAGGTACTAAGTCGAACCATATCTCTCTGTCAGCACCTTTATTTTTAGGTACACATACATT	39:A>G	0.27	0.32	49	5	135	189	2	0.4	0.03
100069766|F|0--31:A>C			TGCAGAACACGGCCCTCGCGATCATCGACCAAACCTACGCCGCCGCGCTCCAGACCGCCGAGATCGGAA	31:A>C	0.18	0.25	32	7	157	196	2	0.3	0.04
100042939|F|0--8:A>G			TGCAGAACAGCGGGATTGGGCAGTCGCCGTACTCGTTGCCGAGATCGGAAGAGCGGTTCAGCAGGAATG	8:A>G	0.34	0.35	109	22	51	182	2	0.45	0.12
100009957|F|0--13:T>G			TGCAGAACCAGAATCATCGAAGAAATCCAACAAGTTGGGAGATAAAGCGCCGAGATCGGAAGAGCGGTT	13:T>G	0.42	0.37	77	26	110	213	2	0.49	0.12
100012235|F|0--41:G>A	chr6R	768715788	TGCAGAACCAGGAATCAGCCTTTTGGGATTGAGAGTAAATCGTGAAGTAGGATTAGCATGCGAGATTGT	41:G>A	0.11	0.18	148	25	8	181	2	0.2	0.14
100070030|F|0--19:G>C			TGCAGAACGACGGCGTGGTGAACCCCGAGGCCATCATGATGCAGGCCATCGCCGAGATCGGAAGAGCGG	19:G>C	0.23	0.29	160	8	46	214	2	0.36	0.04
100017865|F|0--42:C>T	chr1R	657620722	TGCAGAACGGGCCGCAGTTCCACCTGTCCTTCACGCGGTGCACGGACGTGAAGGCCAACTTCCTCCGAG	42:C>T	0.18	0.25	0	70	128	198	2	0.29	0.35
100011582|F|0--58:C>T	chr5R	526700993	TGCAGAACGTCCTCCCCACGCAGCTCCTCTCCCTCCTCCACTCGCTCTGGCAGTCGCTCCAGGACTCGC	58:C>T	0.1	0.17	19	2	177	198	2	0.18	0.01
100017951|F|0--66:C>G	chr1R	374159366	TGCAGAACTCAACAGCAGCACATCCAAATAGGAACAGAGGTAAAGGAGACTTGGGGAGCTTTGAGCCTT	66:C>G	0.41	0.37	105	24	68	197	2	0.48	0.12
100001252|F|0--56:A>G	chr2R	81719378	TGCAGAACTCTTTTTCCTCTGAAAACTTGCATCTGTTGGGATCACTCACAACCATCAGCAGAATTGGTA	56:A>G	0.17	0.25	25	24	163	212	2	0.29	0.11
100003407|F|0--33:A>C	chr4R	815923199	TGCAGAACTTCATTTTCTCTCCGCTGTCGCTCTACCGCAGCCTCCTGTATACGCTGAACATGCCGTCAT	33:A>C	0.25	0.3	7	89	110	206	2	0.38	0.43
100029098|F|0--48:A>G	chr7R	253800306	TGCAGAAGAAATACGGCATTCCTGCACGCCAACAGGATTATGGTGTTCATAATTTGAGAGGATTCAGTA	48:A>G	0.47	0.37	77	13	88	178	2	0.5	0.07
100070027|F|0--18:T>C			TGCAGAAGAAGTCGACGATGAGGACGGCCGGGGAGGCGCCGAGATCGGAAGAGCGGTTCAGCAGGAATG	18:T>C	0.29	0.33	133	10	51	194	2	0.41	0.05
100000908|F|0--23:G>T			TGCAGAAGACTAGTATTTTACTCGAGCTGACTTTCTACATATCGATCAATCCACTCCGAGATCGGAAGA	23:G>T	0.12	0.19	14	23	177	214	2	0.21	0.11
100026540|F|0--12:C>T	chr5R	441727827	TGCAGAAGAGGCCCTGCAATGGACATTTGTCACCTCTGGTTCGAGACTTCGAGTACTACACGCGGTTTG	12:C>T	0.18	0.25	31	6	149	186	2	0.3	0.03
100011304|F|0--36:T>C			TGCAGAAGAGGGCCTTGCATCAACAATGACGTGATCTAGCTGAGCGGTCAAACCTTCTCCGCAATGGCA	36:T>C	0.36	0.35	123	7	68	198	2	0.46	0.04
100061266|F|0--13:G>T			TGCAGAAGCAAAAGAGCGAACACGTACCGCTCGTGAAGCAGGCCCTGAACCCGAGATCGGAAGAGCGGT	13:G>T	0.07	0.12	9	5	159	173	2	0.12	0.03
100061266|F|0--6:A>C			TGCAGAAGCAAAAGAGCGAACACGTACCGCTCGTGAAGCAGGCCCTGAACCCGAGATCGGAAGAGCGGT	6:A>C	0.15	0.22	24	7	150	181	2	0.26	0.04
100018724|F|0--43:A>G			TGCAGAAGCAGGACGTGCGCGACTTCGGGGTCATCCTGCTGGAAATCCTCACGGGCCGAGATCGGAAGA	43:A>G	0.31	0.33	52	26	134	212	2	0.43	0.12
100061617|F|0--39:T>C	chr4R	121843333	TGCAGAAGCATGCATGCATGCATACTCCTAGGACAAGAGTATAACCTTACCGAGGTGAAAGTTTGTCAT	39:T>C	0.17	0.24	172	9	32	213	2	0.28	0.04
100017167|F|0--31:C>G	chr5R	741641706	TGCAGAAGCCCAATTATACACTTTACGCGATCAAATTCACAGCAATACAGTTCATCAACCTATTTATTG	31:C>G	0.08	0.14	11	10	176	197	2	0.15	0.05
100074192|F|0--58:C>A	chr4R	605998713	TGCAGAAGCTCATCGTGCTCGCGCTCCTCACCCTCTGGAGCCACCTCTCCCGCAACGGCTCCCTCGAGT	58:C>A	0.07	0.13	198	0	16	214	2	0.14	0
100005706|F|0--58:C>T	chr2R	917508267	TGCAGAAGCTGTGGCGCCTCGACCTGTCCAAGAACAAGCTCACGGGCGCTCTGCCTGACGACTTCGCCG	58:C>T	0.3	0.33	45	31	123	199	2	0.42	0.16
100057835|F|0--67:T>G	chr6R	27952551	TGCAGAAGGCGATCGACTACGCGTGCGGGCAGGGCGCGGACTGCACGGCCATCGAGCAGAGCGGGGCTT	67:T>G	0.13	0.2	24	3	171	198	2	0.22	0.02
100037189|F|0--59:A>C	chr6R	738407731	TGCAGAAGGCGATGCTGCTGTGGGTGCTGGACCCCGTGGGCCGCGACGCCGCCATCCTCAACCAGTCCC	59:A>C	0.2	0.27	32	5	139	176	2	0.32	0.03
100004041|F|0--28:G>A	chr2R	73067224	TGCAGAAGGTGTGGGAATGCCCAGCTCCGCCTGAGCCGTGTTCCCTGATGGCATCTCACATCCTGCCGT	28:G>A	0.06	0.11	173	4	10	187	2	0.12	0.02
100004041|F|0--40:T>C	chr2R	73067224	TGCAGAAGGTGTGGGAATGCCCAGCTCCGCCTGAGCCGTGTTCCCTGATGGCATCTCACATCCTGCCGT	40:T>C	0.16	0.23	146	17	21	184	2	0.27	0.09
100039825|F|0--55:A>G			TGCAGAAGTAGCAGCATCAGCAAGCAGCGTAGCAGTAGCAGAGCAAGCAGAGCAGAAGCAGCGACGTCG	55:A>G	0.42	0.37	78	8	108	194	2	0.49	0.04
100020061|F|0--27:G>T			TGCAGAAGTGCATCTTACGGTTCCTGTGCAGGGCGGTGGCCGAGATCGGAAGAGCGGTTCAGCAGGAAT	27:G>T	0.08	0.14	11	12	191	214	2	0.15	0.06
100005490|F|0--40:C>G			TGCAGAAGTGGGGCTTCATGGAGGAGTTCTCCTGGTACACCGCCGAGATCGGAAGAGCGGTTCAGCAGG	40:C>G	0.29	0.33	50	15	133	198	2	0.41	0.08
100054977|F|0--52:T>G	chr2R	897947159	TGCAGAAGTTCTTCCAGGCGCAGAGCAAGGTCTGGGCCATGACCTTCATCTCTGGCGCGGGGCTCGCCC	52:T>G	0.09	0.16	168	10	13	191	2	0.17	0.05
100002090|F|0--45:C>T	chr6R	718639073	TGCAGAATACATTGTCTCGAGGTACAATCCCACTTGATTCTCAAACAATCACTGATTCATGAATTGCAG	45:C>T	0.21	0.27	22	29	126	177	2	0.33	0.16
100039450|F|0--40:G>C	chr4R	772075638	TGCAGAATACGCCAAAGCTGATTGCCACAATCCCAAGGGAGAAACTCGCCTATCCTGTCTATCTGGTAG	40:G>C	0.09	0.15	173	10	12	195	2	0.16	0.05
100013233|F|0--20:T>C	chr6R	142334460	TGCAGAATAGTCCGCTGATCTGCCCTTGCCCCCTTCCCTCCTTGGCAAAGCGGAGCGCGCCAGGCGGAG	20:T>C	0.23	0.29	109	81	4	194	2	0.35	0.42
100023072|F|0--11:T>A	chr7R	814537147	TGCAGAATCAATGTCGCTGCCACCAGATCCATGAGAAGGCAGTGATTGGAGAAGTTTTCTCCATGGGTA	11:T>A	0.5	0.37	46	101	45	192	2	0.5	0.53
100001581|F|0--8:G>A	chr5R	791561453	TGCAGAATGCATACATAAATAAATGATCATCAGTGTACACCACTAGTTATCGCAGAATTTACGCCATAT	8:G>A	0.2	0.27	148	8	34	190	2	0.32	0.04
100011793|F|0--41:G>A	chrUn	18333489	TGCAGAATGCCGCTGAACTCCGTGTATGGCCCAGAAGACGGGTTGTTCAGATAGAGCAAGTTGCCCAGA	41:G>A	0.19	0.26	167	3	38	208	2	0.31	0.01
100034779|F|0--60:G>A	chr2R	625483113	TGCAGAATGTTCAAATCTTGACCCAGGAGCCACGGTGTGGGCCTCTTCTCAAGCCCGAGTGCCCGACTG	60:G>A	0.37	0.36	59	17	105	181	2	0.47	0.09
100047764|F|0--67:G>A	chr1R	692545777	TGCAGAATTAGCTAGCGACGTGCCTGCTCTACTGAAATTCATGTCGGCGGAACCACGGCGAGAAGCTGC	67:G>A	0.11	0.18	161	10	16	187	2	0.2	0.05
100017557|F|0--5:A>C	chr5R	723460643	TGCAGAATTATTATTTCAACGCCCCTCTATCTTGGTAACACTAAAACTGTTGACAGAAGTCTGAATATT	5:A>C	0.19	0.26	32	2	142	176	2	0.3	0.01
100022062|F|0--6:A>G	chr6R	713257097	TGCAGAATTCTTATCTACAGCAGCTCCTCAGTGGTCATATCTATCGGCGACCCCTCCATCAGCAATGCA	6:A>G	0.47	0.37	67	32	76	175	2	0.5	0.18
100024587|F|0--62:G>A	chr7R	671792018	TGCAGAATTGAAGAGTAGGCTACACATTACCATCGACCAAGGTAAAAATAAGCGGGGCTTTTGACTAAT	62:G>A	0.07	0.12	185	11	8	204	2	0.12	0.05
100007870|F|0--22:A>G	chr7R	805941541	TGCAGAATTGATCCAGGGATTTACTAGTTTTACGTTGTGCAACCAGCGGAATCCATCAGGTTGATAGCG	22:A>G	0.41	0.37	70	6	103	179	2	0.48	0.03
100009193|F|0--51:A>T	chr7R	571194704	TGCAGAATTGCGGCCAAGTCGAAAGAGGTTAGTGGTTGTTTACTGTTTTTAAAACTTTAGACATTTACA	51:A>T	0.12	0.19	18	15	181	214	2	0.21	0.07
100008847|F|0--30:C>T			TGCAGAATTGGTTCAGCACAGTGAAACACACCGCGGGCCGAGATCGGAAGAGCGGTTCAGCAGGAATGC	30:C>T	0.25	0.3	40	19	139	198	2	0.38	0.1
100003371|F|0--8:T>A	chr7R	213143027	TGCAGAATTTATAGAGGGCTGGGGATTTATGGAGAAAAGGAGAAAGCAAAGCTTCTGGAAAGTTCTCTC	8:T>A	0.06	0.1	176	22	0	198	2	0.1	0.11
100050297|F|0--24:C>T	chr2R	89984126	TGCAGAATTTTACCTGGGGAACCGCTTGGGATGCACATGAACCCTTAGATAAGTGCCGGCCTCAAGGTG	24:C>T	0.3	0.33	55	8	135	198	2	0.42	0.04
100028968|F|0--44:T>A	chr5R	861111126	TGCAGACAAAAGGCATCTCTGAATTATCTCCACCACCCGACCGATTTCATTTCAAGAAAGGCAGGCGGC	44:T>A	0.18	0.25	173	6	35	214	2	0.29	0.03
100032093|F|0--58:C>T	chr1R	463114667	TGCAGACAAAGGAACTGATAGCAGAGATTGAATTGCTCGAAGAGGAAATCGCGAACCGCGAGCAGCACG	58:C>T	0.4	0.36	73	12	113	198	2	0.48	0.06
100003432|F|0--67:C>G	chr5R	29082168	TGCAGACAAGGTGGGCAAGTGGCATAGATCTGCCTGTGCTGCTTTGTCAAGGGGTTGCATATGATGACA	67:C>G	0.3	0.33	48	31	135	214	2	0.42	0.14
100005356|F|0--39:C>A			TGCAGACACACCAATTAGCATATGAGGAGCTGGAGGAGCCCACCGAGATCGGAAGAGCGGTTCAGCAGG	39:C>A	0.41	0.37	109	30	72	211	2	0.48	0.14
100023829|F|0--6:C>G	chr6R	574521303	TGCAGACACATCTGTCTTCCATGGACGAGTCGCCGTGGCAGCCTGGCTGGCGACGACAGCATGGAATCT	6:C>G	0.14	0.22	21	13	158	192	2	0.25	0.07
100069219|F|0--15:C>G	chr7R	65942426	TGCAGACACCATGGACTCGGTGAAGGACGTCCTGGGGAAGATGGGGAAGAGGTTCGGCGAGGCCGCCCG	15:C>G	0.06	0.11	5	15	190	210	2	0.11	0.07
100050385|F|0--31:G>A			TGCAGACACCGACCGCCCAGGCCTCGCTCCTGTCCGCAGCCCCCGAGATCGGAAGAGCGGTTCAGCAGG	31:G>A	0.18	0.25	129	65	2	196	2	0.29	0.33
100035566|F|0--50:A>G	chr5R	841616147	TGCAGACAGAGTGAGTAGTAGACATGGAATGATTGGTAAATTAACGTGTAAACAGAAGAGATAGATGGT	50:A>G	0.31	0.34	16	80	82	178	2	0.43	0.45
100024194|F|0--23:A>C	chr7R	32157449	TGCAGACAGCAGCAACCGTGCCAAACTGCGAACCAAAAGGATCTGGCGACGACGTGCCCAAGGACTACA	23:A>C	0.05	0.09	5	9	167	181	2	0.1	0.05
100011513|F|0--19:T>C	chr5R	575605269	TGCAGACAGCCATACTTGTTGGCACTGTTGAATAATGTATTTAGGTGTGGATCCTCTTTCCCGATGATT	19:T>C	0.22	0.29	139	2	39	180	2	0.35	0.01
100001787|F|0--60:G>T	chr7R	874953695	TGCAGACAGTCTCAGTCTAAATCCAGTAAGTCACATACAGTTGCTGTCCAAGCTGCTAATGGGTATGCC	60:G>T	0.06	0.11	11	1	169	181	2	0.12	0.01
100002204|F|0--37:G>C			TGCAGACATCCCTGAGCAGAACGTGAGCCTGGCCAAGGCCGAGATCGGAAGAGCGGTTCAGCAGGAATG	37:G>C	0.2	0.27	156	17	32	205	2	0.32	0.08
100041010|F|0--22:C>A	chr6R	690197965	TGCAGACATGGGAATACTATGACCAGGGGCAACTAGACAAGATCATCGACAGCTCGCTGGGCGACGACC	22:C>A	0.23	0.29	141	12	37	190	2	0.35	0.06
100024614|F|0--10:C>A	chr1R	663429253	TGCAGACCAACGAACTGAGGTATCGTTTTTTTTTACGGGAACCAGGGATGAAAACTTGCCCATCACAAA	10:C>A	0.3	0.33	135	4	58	197	2	0.42	0.02
100011442|F|0--25:C>T			TGCAGACCAAGAAGCAGTTCATCTACGGCAGCGTCTCCACCCTCATCAAGCTCGTCCCGAGATCGGAAG	25:C>T	0.16	0.23	21	19	153	193	2	0.27	0.1
100015970|F|0--37:A>C	chr5R	832106063	TGCAGACCAAGTTAAGGTGTATGGATTCATGGCTGTCAGGGATACTCGGGACCATCTGCGTAACTACAT	37:A>C	0.32	0.34	121	9	54	184	2	0.43	0.05
100032444|F|0--7:C>T	chr4R	639529946	TGCAGACCAGCACGAGAACGCACCTGCACCACAGCAGCGCTGCCACGCAGCCCCCAACCCTGCCACGAG	7:C>T	0.32	0.34	57	13	128	198	2	0.44	0.07
100056360|F|0--61:G>A	chr5R	582083568	TGCAGACCATCCGCCACATGCTCCAGATTCACGTCCTCGTCGACTACTACGGCGGCAAGAAGCTCCACC	61:G>A	0.06	0.11	181	8	8	197	2	0.11	0.04
100017315|F|0--49:A>G	chr2R	183378117	TGCAGACCATGATCCTCACGACAGCGGTGCCCCTGGTGGCCATGCAGCTACTGTTCACGGCGTCGGCTG	49:A>G	0.21	0.28	40	12	162	214	2	0.34	0.06
100040802|F|0--48:G>T	chr2R	19937304	TGCAGACCCCACGCCTGCGCTCGCTGCGGTACAAGGGCGGCCTCCCTCGGGACACCTGGTTAATCTACG	48:G>T	0.1	0.16	16	6	175	197	2	0.17	0.03
100039699|F|0--7:C>G			TGCAGACCCCGTTCACCACCGAGTAGTACTGCCCGCCGAAACTCAGCTCCGAGATCGGAAGAGCGGTTC	7:C>G	0.06	0.11	3	19	188	210	2	0.11	0.09
100002450|F|0--47:T>G			TGCAGACCCTCACCAACAACCTCTGCTACACGTAAGTTCCGCAGTCCTTCGCCCGAGATCGGAAGAGCG	47:T>G	0.08	0.14	193	4	16	213	2	0.15	0.02
100011361|F|0--25:T>C	chr2R	80665385	TGCAGACCCTTGTTGTGCAGGTCCTTGGAGCTGCTTATGTCCTCTACAAGTACATGGCCGACAGCGGGA	25:T>C	0.1	0.16	183	20	11	214	2	0.18	0.09
100020060|F|0--65:G>T	chr5R	439556765	TGCAGACCGAGCAGGCATGTGCCCAATACATACTGTATTTGGTAACGTGCCAGGTACAGTATACAGATT	65:G>T	0.08	0.13	12	4	168	184	2	0.14	0.02
100034031|F|0--32:C>T			TGCAGACCGCCGTGATGCTCGCCGCCGTCAGCCTCACCACCTCCCTCCGAGATCGGAAGAGCGGTTCAG	32:C>T	0.32	0.34	41	53	114	208	2	0.44	0.25
100080053|F|0--23:G>C	chr6R	79119547	TGCAGACCGTCGCCGCGCCTCCCGTCGCTGGTCCACCATCGCCAACTTGCCGTGGTGAGCAGACACTGC	23:G>C	0.09	0.15	11	11	155	177	2	0.17	0.06
100009138|F|0--23:C>T	chr3R	73631345	TGCAGACCTCCAAACTCCTATGTCCTCTCTGATGAGGTCTAAAACTCGCTCAGTGCTGCACGCGGTTTG	23:C>T	0.28	0.32	40	28	126	194	2	0.4	0.14
100036759|F|0--42:T>C	chr7R	805832135	TGCAGACCTCGACGCGCTGTCGCCGTCATCACTTGATGTCCGTGCACCGTCGCAGATCAAAACTTTCAG	42:T>C	0.39	0.36	104	6	66	176	2	0.48	0.03
100031803|F|0--16:C>T	chr5R	519505940	TGCAGACCTGGGGCTTCTTCCTGGTGAGCGAACGTCTGCAACTGCATGCGTGCACCTCGATTAGCTCGT	16:C>T	0.07	0.13	13	1	167	181	2	0.14	0.01
100006869|F|0--56:A>T	chr7R	182998148	TGCAGACCTTGGTTGCTGGCTGCTTGCATCTGTTGGAGATAGTACGGTGAAAACCCATGCTGACCTCCT	56:A>T	0.25	0.31	42	22	146	210	2	0.38	0.1
100042560|F|0--20:C>G	chr6R	826769798	TGCAGACGATCGGAGCCCCTCGCATAAGAAATGAGTCATACTTGAAGTTTTTCATCATCTGTATATACA	20:C>G	0.37	0.36	68	7	119	194	2	0.47	0.04
100084087|F|0--13:C>G			TGCAGACGCACCGCCGCGTCTCGAGGTCCCAGACCCTGATGCCGCCGTCCGCCGCGCCGAGATCGGAAG	13:C>G	0.45	0.37	71	20	90	181	2	0.49	0.11
100115351|F|0--10:A>T	chr4R	528201145	TGCAGACGCCAGCTAGTTTCTTTAGATGATGATCGAGGCGCCAGTGAGTCGCATGGCGGAGACCACATA	10:A>T	0.23	0.29	39	18	156	213	2	0.35	0.08
100057092|F|0--53:C>T	chrUn	341823679	TGCAGACGCGGACGAATGGTTGGACGTGCCTTTTTGCCTTCGCTGGATCAATTCAGATCAGTTTCGGTC	53:C>T	0.32	0.34	56	11	123	190	2	0.44	0.06
100034612|F|0--68:G>C	chr5R	866926913	TGCAGACGGTCCACACCTCCTGCATTTTCAAGTCGTATGCGCATACGTTATTGTGTCAATGACACTTAG	68:G>C	0.32	0.34	116	17	51	184	2	0.44	0.09
100075776|F|0--49:T>A			TGCAGACGGTGGTGGTGACCACCAAGTGGGAGACGTTCGACAACGGCGCTGCCCCGAGATCGGAAGAGC	49:T>A	0.2	0.27	39	7	168	214	2	0.32	0.03
100028437|F|0--34:C>G	chr2R	3967539	TGCAGACGTCGCGGGAGCCCACGCCGCGGCAGTCCAGCTTCAACCAGTCCGACTTCTACTCCATGTTCA	34:C>G	0.11	0.18	15	17	182	214	2	0.2	0.08
100013207|F|0--5:A>G	chr6R	660429138	TGCAGACTAAAGGCAAAAGGAAACTCACCTAGGGATTGAGGTTCCTCACAACCATCTGCCTGCCTGCGG	5:A>G	0.4	0.36	36	67	71	174	2	0.48	0.39
100004257|F|0--5:A>T	chr6R	838665321	TGCAGACTAAGATGGAAGTGTGTGCATGGCATTGCTGCCAGCGAAATTCACACAGGCCAACGATGTTTG	5:A>T	0.32	0.34	63	9	140	212	2	0.43	0.04
100039637|F|0--50:A>G	chr2R	873514518	TGCAGACTCAGTTTCAGCTGCTGGCTCGTAATTTCTGCGTGGCTGCAAAAATCTGAAGCAAATACTTTC	50:A>G	0.09	0.15	15	3	159	177	2	0.17	0.02
100025144|F|0--39:C>T			TGCAGACTGGTATTTACCTTGCCGTTTTTCCTTATTGTCCGACGGTGTCACCGTCCCGAGATCGGAAGA	39:C>T	0.11	0.17	18	6	171	195	2	0.19	0.03
100025144|F|0--51:C>T			TGCAGACTGGTATTTACCTTGCCGTTTTTCCTTATTGTCCGACGGTGTCACCGTCCCGAGATCGGAAGA	51:C>T	0.22	0.28	35	7	133	175	2	0.34	0.04
100005404|F|0--50:G>C	chr7R	843127958	TGCAGACTTGATTTGTTACACAACAAGAGTAGCATAAATAGATCCATGGTGAAATGGAAAGACCACCGA	50:G>C	0.28	0.32	149	11	54	214	2	0.4	0.05
100001454|F|0--24:C>A			TGCAGACTTGTTAAGTTCAGTAGACAACACATGACAGTCTACCGAGATCGGAAGAGCGGTTCAGCAGGA	24:C>A	0.21	0.27	151	20	32	203	2	0.33	0.1
100042411|F|0--13:C>G	chr5R	853114161	TGCAGAGAAACCTCGGCGACGAGATGCGGGAGTTCTCGCTGCACAGGTTCTTCGATTGCTCTTTGGATT	13:C>G	0.09	0.15	16	1	160	177	2	0.17	0.01
100001848|F|0--21:G>T	chr5R	645284885	TGCAGAGAACCATCTTGAATAGGTAACTGGAATTGATCACAATGGAAGAAGCTGGTTGCAAAGAACAAC	21:G>T	0.15	0.22	25	11	170	206	2	0.25	0.05
100033311|F|0--12:T>C	chr2R	719171687	TGCAGAGAAGAATTAGCATAACAATTACTACTTGTCGATCAAATGAAATGAACCAACTGTGCCATACTA	12:T>C	0.48	0.37	96	13	88	197	2	0.5	0.07
100015504|F|0--47:T>C	chr1R	499187773	TGCAGAGAAGCCATGAGCGCCATCATCTTGAAGTTGGAGCACGTGTGTGGAATAGCCACGTAGAAGATC	47:T>C	0.2	0.27	155	16	32	203	2	0.32	0.08
100002724|F|0--25:C>A			TGCAGAGACAGCAGCACCCGCCCACCACAAATAAACTAAAAATTCCACCGAGATCGGAAGAGCGGTTCA	25:C>A	0.07	0.13	181	5	12	198	2	0.14	0.03
100056796|F|0--32:T>C	chr4R	37006798	TGCAGAGACTACATACCAGAGGCGAGGGCCTTTCGAGCCGTGGGCTGTGTTGGGGACTCCATCAAATTT	32:T>C	0.14	0.21	145	8	20	173	2	0.24	0.05
100056796|F|0--44:C>T	chr4R	37006798	TGCAGAGACTACATACCAGAGGCGAGGGCCTTTCGAGCCGTGGGCTGTGTTGGGGACTCCATCAAATTT	44:C>T	0.29	0.33	47	12	126	185	2	0.41	0.06
100064228|F|0--14:G>A			TGCAGAGAGAGGTGGTTCCAGGTTGGCCATCATGGATTGCCGAGATCGGAAGAGCGGTTCAGCAGGAAT	14:G>A	0.05	0.1	198	3	10	211	2	0.1	0.01
100019962|F|0--24:C>G			TGCAGAGAGGGAAAAGCAGGGGAGCAGGTCGCTGGGCTGCCACGCGTCGTCCACCGAGATCGGAAGAGC	24:C>G	0.06	0.1	7	11	196	214	2	0.11	0.05
100056355|F|0--9:A>G	chr7R	259418004	TGCAGAGCAAACGCGCCACCTCGGGGTTGGACAGCGACTTGGGGAGCTCCCGCAGGAAGGCCTGGAGGC	9:A>G	0.41	0.37	75	9	111	195	2	0.48	0.05
100013580|F|0--34:C>T			TGCAGAGCAAATCAGAGTTCCTTATCTCCGAGGTCAGGTTGGAACCGAGATCGGAAGAGCGGTTCAGCA	34:C>T	0.06	0.1	10	1	170	181	2	0.11	0.01
100042330|F|0--55:T>C	chr4R	16254782	TGCAGAGCACGTCGAGAAGAACCTGGAAGGCCTCAACGTCCAACAGGTAATAACATACAGGAGTCGGCC	55:T>C	0.39	0.36	114	6	72	192	2	0.48	0.03
100043002|F|0--46:T>C	chr6R	639789823	TGCAGAGCAGAGTTGTATGCAACTCTGGTCGATAAATCTGGAATGTTCTTCCATTCTTCTCTCTGCACT	46:T>C	0.13	0.2	146	11	17	174	2	0.23	0.06
100019480|F|0--40:C>G			TGCAGAGCATCCAGGGCAAGAGGCCCTTCATCCTCACGCGCTCCACGTTCGTCGGCTCCGAGATCGGAA	40:C>G	0.19	0.26	33	11	154	198	2	0.31	0.06
100002802|F|0--60:C>A	chr7R	142396232	TGCAGAGCCACAATGGAAACATCATCCTCAAAAAGCCTAGATTCTCACGGTAGCCTAGCTCGCTAGGCC	60:C>A	0.4	0.37	119	16	78	213	2	0.48	0.08
100037279|F|0--57:C>G	chr5R	59007445	TGCAGAGCCACATGCAGCGTGCACGAGAGCTGCCGCTGCTCGCAAGTTTCCAGGAGGCTGATGCGACGG	57:C>G	0.46	0.37	95	8	80	183	2	0.5	0.04
100053363|F|0--35:A>G			TGCAGAGCCCTGTTGCCGCCGTGCTGCCAGCGGACATGGCCGAGATCGGAAGAGCGGTTCAGCAGGAAT	35:A>G	0.26	0.31	40	23	135	198	2	0.38	0.12
100008717|F|0--67:T>C	chr6R	482971827	TGCAGAGCCGTCACCCAAGTCACACCATACAAATCCGTGGAAACCATACTGGATGCCTCCGCCGCCCTT	67:T>C	0.14	0.21	163	15	20	198	2	0.24	0.08
100006476|F|0--23:A>G	chr3R	705458727	TGCAGAGCCGTCTCCGAGACATTAGTTGAAGCAACACACCAAGTACCATTTGAACGGTTTCCTCCAGTC	23:A>G	0.08	0.13	11	9	178	198	2	0.14	0.05
100008001|F|0--36:T>C			TGCAGAGCCTACATGGCATGGCCTCAAAGCCTTTCCTCCGTCCTAGCTGGCGCCGCCCGAGATCGGAAG	36:T>C	0.05	0.1	187	14	4	205	2	0.1	0.07
100025805|F|0--15:C>G	chr2R	64066005	TGCAGAGCGTGGGTTCGCGTGTTAACACCGTTCGGGCCGAAACGTGGGACGTAAGCAGGCCTAGAATGC	15:C>G	0.13	0.2	24	6	183	213	2	0.22	0.03
100004793|F|0--39:G>A			TGCAGAGCTACTCATAGATTCTTCTTACTCATCACAAGAGAACACTCCCGAGATCGGAAGAGCGGTTCA	39:G>A	0.28	0.32	109	46	28	183	2	0.4	0.25
100083306|F|0--21:A>G	chr2R	773751616	TGCAGAGCTAGCAGCTAGCAGAACCGCTGATCATCCCGGATCGTTTCTCGTGGACGCCTTCAAAGGTCC	21:A>G	0.18	0.25	31	7	153	191	2	0.3	0.04
100079453|F|0--22:G>A			TGCAGAGCTCAAGCTCCTGGAGGTTATCGAGGGCGGAGGACCGAGATCGGAAGAGCGGTTCAGCAGGAA	22:G>A	0.46	0.37	99	30	84	213	2	0.5	0.14
100022060|F|0--6:G>T	chrUn	287063277	TGCAGAGCTCGATGCGTTGCTTGCTGGTTCGGTTCTTCAGGCACCGTGGTCGATCCAAAATTTCAGCCG	6:G>T	0.13	0.2	0	56	157	213	2	0.23	0.26
100031064|F|0--23:A>C	chr2R	898660554	TGCAGAGCTGGACGATGTCGTCGACGGTGCCGGCCTCGTCCTCCGCTTCAGAGAATGGCATTCCAAGGA	23:A>C	0.1	0.17	16	7	169	192	2	0.18	0.04
100008830|F|0--21:G>A			TGCAGAGGACAACCACCAGGCGGTGTGCTGCTGGGCAAGCCAAGGTCACTCCGAGATCGGAAGAGCGGT	21:G>A	0.07	0.12	171	26	0	197	2	0.12	0.13
100026113|F|0--22:C>T	chr3R	690253079	TGCAGAGGACTTCTCATGCCGACGCGTGCTATTCTTCACAGCCGTTGCTGGTGCTAGTTCAGAATCCTA	22:C>T	0.1	0.17	14	16	184	214	2	0.18	0.07
100007266|F|0--44:A>G	chr4R	463615910	TGCAGAGGCACATATTTTCCCTAAGCTCACGAAAAACATGAATAATTGTCCTTGTATGCCTGACGGAAT	44:A>G	0.2	0.27	39	8	167	214	2	0.32	0.04
100028253|F|0--32:T>C			TGCAGAGGCACCAGCTCAAGAAACTGCTATAATGTGTGCCGTCTTAGGTACCCCGAGATCGGAAGAGCG	32:T>C	0.17	0.24	27	6	142	175	2	0.28	0.03
100018098|F|0--25:C>T	chr1R	390895437	TGCAGAGGCCAGGCCACAAGACGATCCCAGTGTGTAGGTATCGGCGTACGCATCTGGCTCCACCGAGAT	25:C>T	0.41	0.37	67	14	101	182	2	0.48	0.08
100002253|F|0--26:G>C	chr5R	53757917	TGCAGAGGCCATCTTCAGATAGCCAAGAATGGTGGACGCGCTGGTATTGTAGTCGTCACTCGTCACCTC	26:G>C	0.07	0.13	173	28	1	202	2	0.14	0.14
100011970|F|0--18:G>A	chr6R	662091525	TGCAGAGGCCGCTGCATGGCGATGGTTTGCTCGTTAGCAGACGGCAGACGCATGAGCCAGCGACTCCGA	18:G>A	0.25	0.3	104	51	17	172	2	0.37	0.3
100056351|F|0--50:G>C	chr6R	728614838	TGCAGAGGCGTCTCGTCCTCGCCGCCCTGGCTCAGCGTCTCCATCAGGTTGCCCCACTCCGTCCGCATC	50:G>C	0.14	0.21	170	1	27	198	2	0.24	0.01
100003070|F|0--15:G>C	chr7R	639573557	TGCAGAGGCTTCGCAGCAATTACTACTACCACATGCAGGAAGCAACAAAGGATTTTATCCTATTTATGC	15:G>C	0.34	0.35	136	11	67	214	2	0.45	0.05
100018360|F|0--12:C>G			TGCAGAGGGAAACAGACGGGACAATTGATGTGTGTTGTGCCGAGATCGGAAGAGCGGTTCAGCAGGAAT	12:C>G	0.09	0.15	16	5	183	204	2	0.16	0.02
100018360|F|0--32:T>C			TGCAGAGGGAAACAGACGGGACAATTGATGTGTGTTGTGCCGAGATCGGAAGAGCGGTTCAGCAGGAAT	32:T>C	0.06	0.1	187	10	7	204	2	0.11	0.05
100107554|F|0--12:C>G	chr6R	638033602	TGCAGAGGGAAACAGACGGGACAATTGATGTGTGTTGTGCCGGCCGGGTAAACCGAGCCAGCTTTTGCC	12:C>G	0.1	0.16	16	4	169	189	2	0.17	0.02
100082556|F|0--12:G>T	chr3R	680611060	TGCAGAGGGGCAGCAGCCGTACCGCGTCCTCGGCGTCGCAGTGGTGCTTGTAGATGTTGACGAAGAAGC	12:G>T	0.1	0.17	19	6	189	214	2	0.18	0.03
100061420|F|0--55:T>C	chr6R	19981856	TGCAGAGGTGGGCTGGTTATGTTCTTCGTGGTGAACAAAATATGTGGAGGTAACCTGATCCTGCACACA	55:T>C	0.16	0.23	144	7	25	176	2	0.27	0.04
100028585|F|0--42:A>G			TGCAGAGTACCAGAAGCTGCTTGCACAGAGGCTGAAGGAGCAAAGAGACCGCCGAGATCGGAAGAGCGG	42:A>G	0.22	0.28	0	91	118	209	2	0.34	0.44
100001292|F|0--44:G>A			TGCAGAGTACTAGCTAGCACAAACAATCATCAGGATGCAAACTTGATCAATTGAACTCTCCGAGATCGG	44:G>A	0.19	0.26	139	22	24	185	2	0.31	0.12
100006797|F|0--44:G>A	chr7R	785489702	TGCAGAGTCAGCACAACACATACACGATACACCAGCACTCCGTCGGTCAGTGCACCACAACTGTTGCAA	44:G>A	0.13	0.21	154	28	12	194	2	0.23	0.14
100028962|F|0--67:T>C	chr4R	642200477	TGCAGAGTCATTTGTGGGGTTCACGTGGTACATATCTCGTCGTCGACGCCACTAAGAATACACGATTTG	67:T>C	0.5	0.37	89	13	90	192	2	0.5	0.07
100005789|F|0--51:C>G			TGCAGAGTCCAATCGAGCCATAATGCTGCACATGCGCGCATGTTCCTGGCCCAAGCCCGAGATCGGAAG	51:C>G	0.31	0.33	58	9	137	204	2	0.43	0.04
100010602|F|0--24:G>A			TGCAGAGTCCGCCACCTGTGCTCTGCCGCACCGCCCGCCGAGATCGGAAGAGCGGTTCAGCAGGAATGC	24:G>A	0.18	0.25	137	77	0	214	2	0.3	0.36
100025834|F|0--28:A>G	chrUn	331678600	TGCAGAGTGAAGTGAAGTTGGTAGGGCTAGGCACTGGTTTAACCACACCCAGTCAGTTGGTGAAGATGC	28:A>G	0.2	0.27	32	16	148	196	2	0.32	0.08
100013411|F|0--57:A>G	chr7R	594993921	TGCAGAGTGCAAGGACTACTTCAGCAAGTCCCTGTTTGTGGTGGGAGAGTTTGGGGGAAACGACTACAA	57:A>G	0.18	0.25	25	24	160	209	2	0.29	0.11
100003781|F|0--36:C>T	chr4R	876711684	TGCAGAGTGTAGATAACCCAAAGGCTTGATGATGTACGACAACAACATAATCTCAAACAGAAAACAAAC	36:C>T	0.39	0.36	95	61	51	207	2	0.48	0.29
100022984|F|0--39:G>A	chr3R	780940527	TGCAGAGTGTAGTGGACCTTGCCATGAACTGCCTCGAAAGCGCAGCCATCAACAGGCCGACCATGACCG	39:G>A	0.06	0.11	186	1	12	199	2	0.12	0.01
100016676|F|0--18:A>G	chr6R	676821704	TGCAGAGTTAGACAGATTAATTTTAGGAAGTTCATGCTTGCAGTGGTAGCCCACTTAAAAATCTTGGGA	18:A>G	0.05	0.1	6	9	178	193	2	0.1	0.05
100009850|F|0--38:C>T	chr5R	478011760	TGCAGAGTTCAGCGCGTGAAGCCACCAACAGAGTCCTCCGCATCTCCCCTGATCCTGCACTCGGCAATG	38:C>T	0.16	0.24	27	10	158	195	2	0.27	0.05
100003627|F|0--22:A>G			TGCAGAGTTGAGTATAACTGGAATAGTACCGTTGTCACGGCAACTGACCTCGAATTCCGAGATCGGAAG	22:A>G	0.16	0.23	22	17	149	188	2	0.27	0.09
100052098|F|0--30:A>G	chr1R	553940955	TGCAGAGTTGGCGGCAGAGTGGGTGCGCGCACAGCAGTTACTTCGCCGCGCGTTTCTCGGGGCCTCGCA	30:A>G	0.16	0.23	25	15	161	201	2	0.27	0.07
100004521|F|0--43:G>C	chr4R	623557692	TGCAGAGTTTTATGATTCCATGACTGCTAAGGGCCACAAACTAGATATGCAGGAACAAGGAATGACCCC	43:G>C	0.3	0.33	120	21	46	187	2	0.42	0.11
100084038|F|0--6:G>A	chr1R	118620300	TGCAGAGTTTTTGAAGGAGGACACGACGCAGGCGTTCGTTTTTACGGACCGTGCCAAGGATGCGAGCGT	6:G>A	0.18	0.25	120	58	3	181	2	0.29	0.32
100002440|F|0--28:C>G	chr1R	39042566	TGCAGATAAACATTTTCACCTAACAAGACACCCAACATTGCAGAAAGAGCAAGTTATATACAACCACCG	28:C>G	0.35	0.35	62	4	116	182	2	0.46	0.02
100001795|F|0--14:T>A	chr3R	711247230	TGCAGATAAAGAATTGGTAGTTCCACACAACATCTTGTACTATTAAAGTATGACACAAACTTCAGGAAT	14:T>A	0.12	0.19	181	14	19	214	2	0.21	0.07
100005124|F|0--65:C>T	chr3R	31494839	TGCAGATAACACACTGGTCCCTATCTTTTACAAAGAAGACCCAACAAACATATAAGAAAAGCAATCGGG	65:C>T	0.07	0.12	1	25	167	193	2	0.13	0.13
100019199|F|0--68:G>A	chr7R	207782372	TGCAGATAATCTGTCATGCCCATGAGCCAATGACGTGCGTACGTTCGAATTATATATGCATGGCCGCAG	68:G>A	0.32	0.34	133	3	61	197	2	0.43	0.02
100012515|F|0--58:T>G	chr2R	602054374	TGCAGATACATCATCATCAGGTGGCTAATGGTAAAAAAAATGACGACTGTATGCACACTCTGCATTCCC	58:T>G	0.27	0.32	140	13	48	201	2	0.4	0.06
100000096|F|0--27:C>G			TGCAGATAGATTGTTTGTCCAACCCACCATAGAATGTCCGAGATCGGAAGAGCGGTTCAGCAGGAATGC	27:C>G	0.07	0.11	1	26	187	214	2	0.12	0.12
100012988|F|0--40:T>G			TGCAGATAGGCGTGCACCCCTTCCTTCTCCGCCTGCATCCTCAGCCTCCGAGATCGGAAGAGCGGTTCA	40:T>G	0.4	0.37	114	24	73	211	2	0.48	0.11
100065844|F|0--46:T>G			TGCAGATAGTCGGCGACGTCGAGCGACAGTGAGGAGAAGAACGGTCTGTTCTTGCCGAGATCGGAAGAG	46:T>G	0.48	0.37	92	22	99	213	2	0.5	0.1
100024532|F|0--45:C>T	chr1R	58990363	TGCAGATATACTAACACATCACCAGATCTGCGTTTATGAAAAAAACGGACATATCACCATATTCGTATC	45:C>T	0.11	0.18	19	3	159	181	2	0.2	0.02
100001732|F|0--36:C>G			TGCAGATATATGCTTCTGTACGATGTTGCTGGTAAACTGATCTCCGAGATCGGAAGAGCGGTTCAGCAG	36:C>G	0.06	0.11	10	1	165	176	2	0.11	0.01
100067220|F|0--43:C>G	chr3R	690064072	TGCAGATATGCCTGCCGCTGTACCTGCTCGGAGGAGCCCTGGCCGCGGCCGTCCACGTGATCAACGCCC	43:C>G	0.1	0.16	14	11	173	198	2	0.18	0.06
100003866|F|0--52:G>A	chr3R	754110385	TGCAGATATGGACGCATCGCAGCGTGGACTCTTTGACTAGGTTTATTTATTTGTTTGGAATATCTTTGA	52:G>A	0.14	0.21	178	13	23	214	2	0.24	0.06
100000925|F|0--6:T>C			TGCAGATATGGTACGTGTACGTGCAATTGTACATGGCCGAGATCGGAAGAGCGGTTCAGCAGGAATGCC	6:T>C	0.49	0.37	94	32	88	214	2	0.5	0.15
100037382|F|0--30:C>T	chr7R	627864957	TGCAGATATTTCTCCAGTCCAGTACGCGCACATCACACACCAGTCGCCTGCGTGCACCGCCCGCCATTG	30:C>T	0.43	0.37	80	24	110	214	2	0.49	0.11
100014810|F|0--64:C>A	chr6R	7372880	TGCAGATATTTTCTTACTTCGTGTGTTACGAGGAAGGAAAAGAAAAGTCAGTTCGCGTCTGTTCCCGAC	64:C>A	0.07	0.13	168	22	3	193	2	0.13	0.11
100009921|F|0--55:C>T			TGCAGATCAAACATTCTTACAAATTTGTCATGTGTTTGTGCGTGCAGGTGCACTACAGGACGCTGTGCA	55:C>T	0.24	0.3	37	10	128	175	2	0.36	0.06
100041003|F|0--41:A>T			TGCAGATCAAGAACAGAACAGGTCAGAGTCGTCGTGGAAGGAAGCCGAGATCGGAAGAGCGGTTCAGCA	41:A>T	0.12	0.19	22	9	183	214	2	0.22	0.04
100029769|F|0--43:A>G	chr2R	914072828	TGCAGATCAAGCCAAGCAAGACGACACAACCCTGAATTTCTACAGCAATTTAAAAGGGCACCCGATCCA	43:A>G	0.48	0.37	93	4	84	181	2	0.5	0.02
100004448|F|0--23:A>G	chr1R	712221449	TGCAGATCAAGGGCAGAGCACACAACCCCATAGCTCCCCTTGCCAATCACCTCCTGGATCTTGTACCGA	23:A>G	0.14	0.21	23	9	168	200	2	0.24	0.04
100003659|F|0--31:C>T			TGCAGATCACACCCCTGGCCATTGAGGAGAGCTATCTGATAAATCAGACCGAGATCGGAAGAGCGGTTC	31:C>T	0.07	0.12	10	8	180	198	2	0.13	0.04
100002877|F|0--14:A>T	chr6R	681773256	TGCAGATCACGCCCATGATACCTATAGATTCAGTCCCAGACCACAGCAAAAGAGGCAAAAAGGTTCGAA	14:A>T	0.06	0.1	7	8	175	190	2	0.11	0.04
100002877|F|0--35:C>T	chr6R	681773256	TGCAGATCACGCCCATGATACCTATAGATTCAGTCCCAGACCACAGCAAAAGAGGCAAAAAGGTTCGAA	35:C>T	0.19	0.26	1	71	120	192	2	0.31	0.37
100027320|F|0--26:G>T	chr1R	423127039	TGCAGATCAGCAAGGGAAGCAGCCAAGAAGGAGATGGAAGGGGACTGCTTGCTGCTGCATGGGGCTCGC	26:G>T	0.18	0.25	34	3	161	198	2	0.29	0.02
100022367|F|0--13:C>T			TGCAGATCAGGGCCTCTCAGCTCAGGAGGATTCTACTGGAACTTGGCCCGAGATCGGAAGAGCGGTTCA	13:C>T	0.1	0.16	16	4	164	184	2	0.18	0.02
100013311|F|0--55:G>A	chrUn	347991201	TGCAGATCATCTTTCTGCTTCCTCTTAACTGTTAAGATCAAGATTTTTCATAAAAGGATCAAGACTTTT	55:G>A	0.33	0.34	128	9	61	198	2	0.44	0.05
100008734|F|0--16:T>C	chr1R	709410072	TGCAGATCATTAATAATGACGAGGCAATCATTTTCACACAGAAATTTGCAACACTCTTGGGTTAATCCC	16:T>C	0.34	0.35	58	10	115	183	2	0.45	0.05
100019515|F|0--24:C>T			TGCAGATCCAGAAGATGACCGCGACGAGCTAAGCGGCAGTTTAGCCGAGATCGGAAGAGCGGTTCAGCA	24:C>T	0.15	0.23	18	25	155	198	2	0.26	0.13
100010607|F|0--49:T>G	chr7R	688715181	TGCAGATCCATATCAAGCCATACACAGCAAATAGCTATACAAATGCCGATGGCAAATTCTTTTGTTCCT	49:T>G	0.1	0.17	173	6	17	196	2	0.18	0.03
100033744|F|0--32:A>G			TGCAGATCCCCCAACCCAAACAGCAGCAGGGTAAGAAGCCGATCCAGACGAGCCCGAGATCGGAAGAGC	32:A>G	0.28	0.32	46	18	130	194	2	0.41	0.09
100079432|F|0--22:G>C			TGCAGATCCTCCTGCGCCGCCTGAAGCACCCGCTCGCCCGCCTCCGAGATCGGAAGAGCGGTTCAGCAG	22:G>C	0.32	0.34	127	14	55	196	2	0.43	0.07
100041644|F|0--44:C>G			TGCAGATCGAGATCTACCCAGCGGATCAACATGGCCAGGGCACGCGTACGCCACGCCGAGATCGGAAGA	44:C>G	0.28	0.32	45	19	129	193	2	0.41	0.1
100093644|F|0--66:G>C	chr2R	714241602	TGCAGATCGATGTGGCGCTCCGAGTTGTCTGTCGGATCCACCGATCAATGAGATGGCTGAACCGTGGAG	66:G>C	0.07	0.12	197	4	13	214	2	0.13	0.02
100054710|F|0--28:G>A	chr7R	361881442	TGCAGATCGCGCGACGACCTTAGACGAAGAAGATGACGCGGGGCGACATCGATGCGGATCCTCGTCCTT	28:G>A	0.32	0.34	140	12	62	214	2	0.43	0.06
100004496|F|0--17:A>G	chr5R	831753343	TGCAGATCGTCCGCTTCATTCTCCCCTCTCTTGATCCTCATGTCGAACTCAACCAGCTGCTTGTCATAC	17:A>G	0.12	0.19	1	51	162	214	2	0.22	0.24
100004850|F|0--10:G>T	chr1R	43827422	TGCAGATCGTGGTGATGAACATGCTCATGGGCGCCTCCACCGTCAGCAGCATCCTCTCCACCTACCTCT	10:G>T	0.23	0.29	47	5	162	214	2	0.36	0.02
100057072|F|0--22:G>A	chr4R	559475668	TGCAGATCGTGTTGGAGACACAGCAAACTCGGGTAGGGGCACCTTGTTGATCTGAATGTCGTTGGCGAT	22:G>A	0.17	0.24	147	3	29	179	2	0.28	0.02
100003396|F|0--19:A>C	chr4R	807461574	TGCAGATCGTTGTGCATGGACTCCACCAACGAGAAATGCCCTTGCCTACTGGTTCAACCTCGCCTCTGC	19:A>C	0.48	0.37	65	72	56	193	2	0.5	0.37
100056205|F|0--61:G>C	chr7R	842727921	TGCAGATCTCCATGGTTCTCCCCTCCCCAATCAGCATGATTTGATTCTTAGGAATCCACTTGGGGTGCT	61:G>C	0.14	0.21	160	0	26	186	2	0.24	0
100018277|F|0--34:G>A			TGCAGATCTCGAGGATCCTGGGCGGGCACAAGAAGGACCGAGATCGGAAGAGCGGTTCAGCAGGAATGC	34:G>A	0.13	0.2	141	47	1	189	2	0.23	0.25
100036416|F|0--47:A>C	chr5R	478361010	TGCAGATCTCGGGCTGGTTATGACCAAAGAGGAGGGCAAGCAACACGACCAAGCGGCCCATTCTGCTAG	47:A>C	0.44	0.37	106	6	82	194	2	0.49	0.03
100008275|F|0--28:G>A			TGCAGATCTGGGCATCATTTAAAGCACCGTCTCTATGCAGTATAAGCCGAGATCGGAAGAGCGGTTCAG	28:G>A	0.15	0.22	142	35	11	188	2	0.26	0.19
100034720|F|0--48:C>T	chr2R	27466875	TGCAGATCTTCTGACTGAAAATGGAGTAAGGAGGTGGTGCATGTCAAACTCAGGAAGCATGCATGCCCG	48:C>T	0.45	0.37	101	10	83	194	2	0.5	0.05
100027833|F|0--37:C>T	chr3R	912773631	TGCAGATCTTGCCAGAATGCCCCGACCTGCACACACACGTTTGCCATCACAAATTGTTCATCGTCGACA	37:C>T	0.17	0.24	29	2	145	176	2	0.28	0.01
100026627|F|0--7:G>A	chr1R	16140670	TGCAGATGAACGGAATTATTGACCTATTATCTTCAAAGATTTGCTCAGCTAGAATTTGATTCTTCTAAT	7:G>A	0.31	0.34	114	18	46	178	2	0.43	0.1
100085819|F|0--12:T>C	chr3R	876973332	TGCAGATGACGGTGCCGGCCATGGGCACGGGGAACGGCAGCTCACACGTACGGCGACCTATCGCACGGC	12:T>C	0.07	0.13	178	7	11	196	2	0.14	0.04
100025587|F|0--8:A>G			TGCAGATGATGCCGACGACACCAACGCAACCCAGCCGAGATCGGAAGAGCGGTTCAGCAGGAATGCCGA	8:A>G	0.34	0.35	47	22	104	173	2	0.45	0.13
100001699|F|0--28:C>A			TGCAGATGATGGAGAATGTGCAGAACAGCGAGATTCCCGAGATCGGAAGAGCGGTTCAGCAGGAATGCC	28:C>A	0.12	0.18	185	1	24	210	2	0.21	0
100003005|F|0--61:C>T	chr3R	938420053	TGCAGATGCAAACGAAACGAACAACAGGTCCAGTCAGTGGATAACCACGTTTAAAAATCTCCACAGGAA	61:C>T	0.4	0.36	70	15	111	196	2	0.48	0.08
100014480|F|0--57:A>G			TGCAGATGCCTTGATCCTGGAATGTATGAAAGGGATTGAGATAATTTCGCCCCATTCACTGGTCACCGA	57:A>G	0.26	0.31	41	14	130	185	2	0.38	0.08
100011039|F|0--44:T>C	chr7R	170109297	TGCAGATGCTATGCGCGCCTGCACCCAAGGGCTGTCAACTGCCGTAAGAAGAAGTGTGGCCACAGCAAC	44:T>C	0.11	0.18	169	14	15	198	2	0.2	0.07
100006073|F|0--56:T>C	chr2R	547679292	TGCAGATGCTCTTAGTGGACTTGAACCCGCTGGTTGGCTGGTTTTGTGTTTCATTTTCCGCGGAATGTA	56:T>C	0.13	0.2	164	8	21	193	2	0.23	0.04
100012479|F|0--31:A>G	chr7R	879045008	TGCAGATGCTGACAGAGGGGCCATGGGAAGAACACGATGAGGTCGACCTCGAATTCCTGGGGAACAGCT	31:A>G	0.26	0.31	51	11	152	214	2	0.39	0.05
100018179|F|0--10:G>C	chr2R	782022917	TGCAGATGCTGATCCTCCTATGCTCGCTTCGCTGTAACATATTCCACGAGTCGGAATTTTCAGGGCACT	10:G>C	0.17	0.24	158	5	30	193	2	0.28	0.03
100047200|F|0--15:G>A			TGCAGATGGAGACGGGCGCGTCACGGGCGCCGACGCCACCAAGTTCTTCGCCATGTCCGAGATCGGAAG	15:G>A	0.36	0.36	122	29	63	214	2	0.46	0.14
100007027|F|0--49:G>C			TGCAGATGGAGTACGTGGACCTGTACCTGATCCACTGGCCGATCAGCCTGAAGCCCGAGATCGGAAGAG	49:G>C	0.36	0.35	132	10	72	214	2	0.46	0.05
100001218|F|0--34:A>G			TGCAGATGGATTGGTGACTTCAGTTGCTAAAAGGAAGGGCTCACATGATGACAATTCCCGAGATCGGAA	34:A>G	0.06	0.1	4	16	190	210	2	0.11	0.08
100004577|F|0--42:T>A	chr5R	527752231	TGCAGATGGCATCCATCCATGTTACCTGTGCAAAACCACTAGTGTTTGATTACGGACACGGCTCTGACT	42:T>A	0.12	0.19	188	1	25	214	2	0.21	0
100017697|F|0--24:G>A	chr2R	27710964	TGCAGATGGTAACCAGATAAAATCGGGTAGGTTTATCAACGACGTGCTTTTCAATCCGTAACTGTACAG	24:G>A	0.11	0.17	154	1	18	173	2	0.19	0.01
100035375|F|0--42:C>G			TGCAGATGGTGAGATGAAATCATCGATCTGGCTGGGAAAAATCGACCCGAGATCGGAAGAGCGGTTCAG	42:C>G	0.11	0.17	2	36	150	188	2	0.19	0.19
100032618|F|0--24:A>G			TGCAGATGTCGGGTCCGAGTCCTCACCGGTTGGGCTCCCGAGATCGGAAGAGCGGTTCAGCAGGAATGC	24:A>G	0.21	0.28	33	11	141	185	2	0.33	0.06
100011176|F|0--19:T>C			TGCAGATGTGAGTTGGGGATGGTGACCATGACCTCCGCCCCGAGATCGGAAGAGCGGTTCAGCAGGAAT	19:T>C	0.12	0.19	143	20	11	174	2	0.21	0.11
100009402|F|0--44:T>G	chr7R	298657250	TGCAGATTAAGGGAGCAAGAACAAGGTGAGCACGAACGCCATTATTACTGGCAAATCAGGACTCTCGAA	44:T>G	0.15	0.23	171	18	24	213	2	0.26	0.08
100021085|F|0--26:A>G	chr3R	207279960	TGCAGATTAATGTTCTGTTATTGACTACCTTTTGTACTCCCATGTCCTCCTTTTCATCGCCAATTAATG	26:A>G	0.13	0.2	23	4	166	193	2	0.23	0.02
100025800|F|0--48:G>T	chr1R	377733167	TGCAGATTACATGACATGGATCAAATTGGTTTCAAATGTGAAATGTACGACAAACCTCATTCTTCACTT	48:G>T	0.22	0.29	38	2	135	175	2	0.35	0.01
100036523|F|0--8:A>G	chr2R	139587674	TGCAGATTATTTCGAGGAAGAAACAAAGAAAGTGGTGTAGATGCATGCAATGCATGCATGCGATGGGAT	8:A>G	0.48	0.37	94	10	88	192	2	0.5	0.05
100008525|F|0--28:A>T	chr4R	3503513	TGCAGATTATTTGCCGTCCAAAACTGTTACAAATACTACACGTATCTCTTCCTGAAGAACTTGGTCACC	28:A>T	0.17	0.25	30	12	166	208	2	0.29	0.06
100071155|F|0--15:C>T	chr1R	38605721	TGCAGATTCCGTTTCCAGTGTAGAGGTGTGGCAATGGCGAGGGCCCCGACCATGGTGATCCAGGACGAC	15:C>T	0.14	0.21	17	17	150	184	2	0.24	0.09
100012932|F|0--61:A>G	chr1R	128646113	TGCAGATTCTGCATAAGAACGGGGCGAGGAAGTTCTGGATACACGGGACAGGCGCGCTGGGATGCCTGC	61:A>G	0.07	0.12	9	11	194	214	2	0.13	0.05
100008023|F|0--29:G>T	chr2R	18522608	TGCAGATTGCAAGAACACAAACGTTCATTGATCCTATCGATCTGAGCTTGGCTAATCTCTTCGATTCCA	29:G>T	0.12	0.19	0	53	159	212	2	0.22	0.25
100027019|F|0--58:A>T	chr2R	876589122	TGCAGATTGGCTACACCAAATCGAGCCGCCAGACAAAGAGCAGAGGAAGGAAGAAGCCACAACCCAAGC	58:A>T	0.34	0.35	62	12	126	200	2	0.45	0.06
100077007|F|0--11:C>T	chr1R	697763682	TGCAGATTTCACTAGCTTGCCTGGGTCCTGATGATTCGCTGGTTTCCCAAATGAGCTGGCTCGACGCGC	11:C>T	0.37	0.36	125	10	70	205	2	0.46	0.05
100007764|F|0--32:C>T	chr2R	861570893	TGCAGATTTGCAGATCAAACAAACGAAATGTACTCTGAATGCATAAATCCACCAAAGGACATATGACCG	32:C>T	0.11	0.17	19	4	171	194	2	0.19	0.02
100015101|F|0--17:G>A	chr5R	564756946	TGCAGATTTGCAGCAGCGGATCATGGTCAAAATGGTGTACCTGCCTGAGAATCTGCCGCAGGCCGAGAT	17:G>A	0.27	0.32	134	18	45	197	2	0.4	0.09
100019355|F|0--36:C>G	chr5R	522032691	TGCAGATTTTCTCCAGCTCAGAGGGCCCCAACAGTCCGCGAACTCTCTGAAGGCCTTGTCACCAACGGC	36:C>G	0.44	0.37	82	12	104	198	2	0.49	0.06
100002879|F|0--32:G>A	chrUn	1060004	TGCAGATTTTGAAATTTACCACGGGACATACGGCCATCAGGTGTGGGCAGACCCAAGTACTTGTCCTCA	32:G>A	0.25	0.3	105	51	17	173	2	0.37	0.29
100000940|F|0--6:T>C			TGCAGATTTTGAGCCAGCGAGATCCATGCTGCCAACTGAGATCAATTTCCCAGACAGACCGAGATCGGA	6:T>C	0.38	0.36	69	19	121	209	2	0.47	0.09
100007717|F|0--10:A>T	chr4R	522211696	TGCAGCAAAAAACTTGTGAACGCAAGTTCATACAGCTAGAGCCTAGAAGACAGTAACATATCGCATCTG	10:A>T	0.15	0.22	26	4	161	191	2	0.25	0.02
100005883|F|0--63:C>A	chr4R	74387488	TGCAGCAAAACCTGAACCTGAAGGCTGAAGCAAACCCTCTCAAAAAACACATACAGTAGCAAGCAGCAA	63:C>A	0.41	0.37	100	9	69	178	2	0.48	0.05
100004014|F|0--20:C>T			TGCAGCAAAACTGTATTTTTCTGTGCATACAAAAGAACTTTCTTGTGGGTTGGGCAGCCGAGATCGGAA	20:C>T	0.13	0.2	15	15	147	177	2	0.22	0.08
100005489|F|0--14:G>A	chr1R	430433624	TGCAGCAAAAGGAAGAACAAAAAGGAACGAAAAATTGGATCAGGTCCTGACATATATCTTGGGAAATTT	14:G>A	0.18	0.25	174	4	36	214	2	0.29	0.02
100031992|F|0--65:C>T	chr4R	53921665	TGCAGCAAAAGGTGCCGCGCTTTGCGTGCTTGTGCTACATTTCAGTTCCAATTCAAACGCACTCGCCAT	65:C>T	0.2	0.27	32	6	139	177	2	0.32	0.03
100037426|F|0--49:A>T	chr1R	555412228	TGCAGCAAACAACATTGTTGGATGAGTGAGCAATGGTTGTCACGTTGAAAGGAACTGATGCTGGTGTTG	49:A>T	0.07	0.12	7	14	192	213	2	0.12	0.07
100043074|F|0--49:G>A			TGCAGCAAACAATTACTCAAAATAGTTTTTTTAGACTGTTATGAAAACAGTGAGCTTTTTTTTTAATGC	49:G>A	0.49	0.37	84	4	88	176	2	0.5	0.02
100000846|F|0--23:A>G			TGCAGCAAACGCCTGCACCAACAAAGCAGCCTTCACATCTTCCACCGACAATTCCCGAGATCGGAAGAG	23:A>G	0.09	0.14	8	16	163	187	2	0.16	0.09
100059953|F|0--41:A>G	chr2R	614171602	TGCAGCAAAGAAGACGCCGACGAGCACCTTGACCCTGAGAAACTCGCAGCTCGTCAATGTGTGAAGGAA	41:A>G	0.35	0.35	63	22	129	214	2	0.45	0.1
100049980|F|0--68:C>A	chr4R	539840925	TGCAGCAAAGAGAAGAGCAGGAGCCTGAGGCCGACCGATCGTTCACGGCTCAGGCAACGGCATCGCCGC	68:C>A	0.47	0.37	96	18	83	197	2	0.5	0.09
100045136|F|0--51:G>T	chr6R	603711404	TGCAGCAAAGCTCGTTAGGTCCTGGGGGCACAGCTCGGGCTGGGACGAAGCGAAGCGAAGCTCGGGGAT	51:G>T	0.07	0.13	15	0	192	207	2	0.13	0
100003348|F|0--33:C>G	chr3R	781835199	TGCAGCAAATGCATGTACTACAGCCGACTGACACAAGCCACGCTCCCGTATCATGTACAGCTGCATGCG	33:C>G	0.11	0.17	21	1	180	202	2	0.19	0
100039063|F|0--41:G>A	chr5R	823286107	TGCAGCAAATGGTCACAATAAAACCGACATGAATTACCATCGCCAAGTTTCCACTAAGTAGAGGCTCGG	41:G>A	0.21	0.28	146	15	33	194	2	0.33	0.08
100024658|F|0--17:A>G	chr4R	193283390	TGCAGCAACCACCCCTGATCCACATCGACAACAAACTCCTTGTGGTACAGGCTCTTGACCTTGCCTGTT	17:A>G	0.16	0.23	29	3	157	189	2	0.27	0.02
100022216|F|0--48:A>G	chr7R	182997946	TGCAGCAACGAGCAGATAAACTTGGTTTTCAGGAGTTCTTGAAAATCGACCGACACACAGATGCGTTGT	48:A>G	0.08	0.13	13	4	178	195	2	0.14	0.02
100014713|F|0--45:C>T	chr3R	936360258	TGCAGCAACGCAGCGACGAGAAAACGTTAAGAAAACCCAGCTTGCCAGTGGGCATCGTCGCATCCAATT	45:C>T	0.33	0.34	58	5	123	186	2	0.44	0.03
100030513|F|0--40:G>C	chr6R	660793340	TGCAGCAACGTGGACGCTCCTCTTTGTCTCGCTTGTCGAAGCAGCAGAGCCCTTGACCACATTGACGAC	40:G>C	0.13	0.2	167	12	20	199	2	0.23	0.06
100066245|F|0--30:C>T			TGCAGCAAGAGATCCATGGCAGCGCCCCGCCGCCGTTGCACGTCCAGCGCCGAGATCGGAAGAGCGGTT	30:C>T	0.18	0.25	25	21	152	198	2	0.29	0.11
100001687|F|0--12:T>G	chr2R	151356585	TGCAGCAAGCCTTTGCTGATGGGCTCGCTCTCTGAATTCCATAATCAATTTGGCTGAGAAAATCTCCGA	12:T>G	0.26	0.31	146	24	44	214	2	0.39	0.11
100025294|F|0--35:C>T	chr6R	484047910	TGCAGCAAGCTAACCATGCACGAGCACGAGTCGTCCGTCCTCGCGTCCAAGGTCTTCACCATCTCCGAG	35:C>T	0.18	0.25	28	21	164	213	2	0.3	0.1
100008839|F|0--10:T>A			TGCAGCAAGCTTTGCTCTCAGGTCCTTCCTGAGGATCTTGCCGAGATCGGAAGAGCGGTTCAGCAGGAA	10:T>A	0.42	0.37	76	5	104	185	2	0.49	0.03
100000384|F|0--9:G>A			TGCAGCAAGGCATTGCACTAAATCTAATTAACATCATCCAAATAGTTTAAGCTTGATCTCCGAGATCGG	9:G>A	0.48	0.37	89	41	81	211	2	0.5	0.19
100007597|F|0--5:C>T			TGCAGCAAGGGTTCAAAGTCTGGGGCTTCCATGAAGTGTGCCGAGATCGGAAGAGCGGTTCAGCAGGAA	5:C>T	0.14	0.22	21	8	145	174	2	0.25	0.05
100026248|F|0--60:C>T	chr2R	73625953	TGCAGCAAGTAGTGCAACACAACACTAGCAAGGTCGATCGACCGAAGGTAGCTTAGCTAGCAAGGAAGA	60:C>T	0.15	0.23	27	5	160	192	2	0.26	0.03
100004606|F|0--17:A>G			TGCAGCAAGTCCTCTTCATCCCGAAGAAGAGTTGGTGACCCCGAGATCGGAAGAGCGGTTCAGCAGGAA	17:A>G	0.39	0.36	67	15	111	193	2	0.47	0.08
100026753|F|0--49:T>A	chr2R	943639902	TGCAGCAAGTGGTATTAAGTATGAACACACAGGTCTTTCCTTCTTGGAATCCAAGAGTGTGAGCTGCAT	49:T>A	0.16	0.24	160	1	31	192	2	0.27	0.01
100023333|F|0--6:A>C	chr6R	660793136	TGCAGCAAGTGTCAAGTATCTGGAACTGCAAGTCCTCATCCTGTCAGAGATCAATGTCACTGGTGACTA	6:A>C	0.15	0.22	20	15	153	188	2	0.25	0.08
100004638|F|0--5:C>T	chr3R	45701487	TGCAGCAAGTGTTCACCACTTCGACAGCCATGGATGATGCCATCGCCACTATCAGCCAGACAAAACAGT	5:C>T	0.18	0.25	6	55	125	186	2	0.3	0.3
100023393|F|0--18:A>G	chr7R	81932674	TGCAGCAAGTTGATCGACAAGCCCTGCAAGTTGTGCAGCCGATTGCTTCCGAAGAGTCAATGAAAGTCG	18:A>G	0.2	0.27	30	15	146	191	2	0.32	0.08
100114278|F|0--12:G>A	chr2R	75472304	TGCAGCAATCGAGGGGATGAAGAGCCAGATGGGCGGCGCCGCCAGCGAGGAGACGGTGAGCGACCACGG	12:G>A	0.46	0.37	89	15	75	179	2	0.5	0.08
100030382|F|0--59:T>A	chr1R	439201257	TGCAGCAATGCATGTGACTGCACACTATGCCAAGAAGTCCGCGCGTATCGACAACGCCCTGGAAAGATT	59:T>A	0.37	0.36	126	3	73	202	2	0.47	0.01
100061082|F|0--43:G>A			TGCAGCAATGCGCTCCTCGAGAGCATCAGCGCCGCGCTCCTCCGCCGCCGCCGAGATCGGAAGAGCGGT	43:G>A	0.41	0.37	94	18	62	174	2	0.48	0.1
100069181|F|0--47:C>T	chr2R	735374481	TGCAGCAATGCGTTTGGTTGGCCATGGCTGCTGTCTTCTGCCGCGGCCAGCCCCACCACTAGCTTGCCC	47:C>T	0.08	0.13	14	5	190	209	2	0.15	0.02
100009554|F|0--25:G>C	chr1R	580290171	TGCAGCAATGGGTTGATCTTGCTCGGTACACTGGAATACAGAAGATTCAGGAACAGCTTCCTTCTGATG	25:G>C	0.12	0.19	179	6	23	208	2	0.22	0.03
100000098|F|0--37:A>T	chr4R	682425516	TGCAGCAATTATCCCTGTCTCCAATCGACCTTTGACAAGGTGCTGGCCTTCTCTATCCTGAGCACCTCG	37:A>T	0.15	0.23	10	46	158	214	2	0.26	0.21
100032615|F|0--54:G>T	chr2R	33090462	TGCAGCAATTCAGAATGTGTATGGCAGCAATCAAAACCACTGATGCACAAGAACGCCGCTCTCCCGAGA	54:G>T	0.27	0.32	45	10	130	185	2	0.39	0.05
100020598|F|0--23:G>A	chr3R	635256797	TGCAGCAATTCGCAAGCAAGGGGGAAAAAACCATGGATATCTGTCTAGCTTGGTACTCCACGAAGAAAG	23:G>A	0.35	0.35	59	13	115	187	2	0.46	0.07
100002478|F|0--50:C>T	chr1R	130790597	TGCAGCACAAACAGCATTGTTGTTGAAAGTAGTTCTTGGATGATGGTAAACATACCTTTTCACGATAAG	50:C>T	0.16	0.23	30	2	166	198	2	0.26	0.01
100006160|F|0--43:G>A			TGCAGCACAAGATGAGCGCCAAGGAGTCCGACACCTGGTCCAAGGTGCTCCGAGATCGGAAGAGCGGTT	43:G>A	0.1	0.16	181	23	9	213	2	0.17	0.11
100005213|F|0--26:A>G			TGCAGCACACTAAACTAGAAATAAGCACCCGCATGCAGCCGAGATCGGAAGAGCGGTTCAGCAGGAATG	26:A>G	0.19	0.26	12	48	132	192	2	0.3	0.25
100076137|F|0--8:A>G			TGCAGCACACTTCTATCATCATCTCAGCGGGCGGGCGCCGAGATCGGAAGAGCGGTTCAGCAGGAATGC	8:A>G	0.18	0.25	160	20	27	207	2	0.29	0.1
100039239|F|0--62:T>C	chr2R	877963677	TGCAGCACCACAAGGAAGCAAAAGCACATTAGGAATTCTTGATTCCTCTCTTACCACCTCTCTTGACAC	62:T>C	0.27	0.32	51	7	143	201	2	0.4	0.03
100004258|F|0--24:A>C	chr6R	721541148	TGCAGCACCACACACACGCAAGCAAAGGGAACTCTGGTCGGAATTGATTGGGATTGTGATACATACAAG	24:A>C	0.47	0.37	71	39	82	192	2	0.5	0.2
100046243|F|0--8:C>T	chr4R	181877918	TGCAGCACCACGGCCGTCGACACATCATCCGCAATGGCCCTGGCTAGAGCGCATGGTCCTCCTCAGTGT	8:C>T	0.23	0.29	39	13	143	195	2	0.36	0.07
100003677|F|0--30:T>G			TGCAGCACCACGTCCACCACGGACCCGAACTCCAGCCGAGATCGGAAGAGCGGTTCAGCAGGAATGCCG	30:T>G	0.13	0.2	159	50	2	211	2	0.22	0.24
100031527|F|0--19:C>G			TGCAGCACCAGCACCACCACCAGCACCGACACGGCCGCCACCAGCACTAGCACGGCCAGCACCGTGAAC	19:C>G	0.35	0.35	127	26	61	214	2	0.45	0.12
100002078|F|0--8:C>G			TGCAGCACCAGCAGCGAATCCGTCTCGACCCTCACCAGCACCAGCAGCAGTGAAATGCTTTGAATCGCT	8:C>G	0.16	0.23	28	1	151	180	2	0.27	0.01
100106957|F|0--23:A>C	chr4R	35547098	TGCAGCACCAGCAGGAGCGGGCGAGGGAGGTGTACAGGGAGTGCCTGCGCAACCACGCGGCGAAGCTGG	23:A>C	0.5	0.37	88	15	89	192	2	0.5	0.08
100056339|F|0--35:C>G			TGCAGCACCAGCCCCTCCCTGGGGTAGAACGCGTGCCCGTGCCGCGACGCGTACGCCACCGAGATCGGA	35:C>G	0.08	0.14	16	3	195	214	2	0.15	0.01
100042397|F|0--37:C>A	chr7R	567687597	TGCAGCACCAGGACCATGAAGACCAGGAGCAGGAGGACGCCTCGTCCTGCGACCTCTCCTCCCCGCTGG	37:C>A	0.34	0.35	63	9	126	198	2	0.45	0.05
100003911|F|0--51:C>G	chr6R	713915167	TGCAGCACCCAGATATCAATGATTGTCTTTGCATCATTAGAGCTGGACATGCCAAGCATACCATCCATC	51:C>G	0.07	0.12	12	2	174	188	2	0.13	0.01
100064589|F|0--47:C>T	chr7R	105830220	TGCAGCACCGACAGCGCCATCAACACCTTCAAGTCCGGCAACGACGTCGTCCCCCTCAACGTCACCGAG	47:C>T	0.22	0.28	37	5	137	179	2	0.34	0.03
100063234|F|0--31:C>G	chr4R	541849883	TGCAGCACCGCAACCTGGTGCGGCTGCTGGGCTGGTGCGCCGAGCGCGACGAGAAGCTGCTGGTCTACG	31:C>G	0.23	0.29	32	25	140	197	2	0.35	0.13
100022312|F|0--58:C>T	chr3R	96773137	TGCAGCACCGCCATGCTCCCGAAGCTGATGTACATGACGGACTTGTCGTCCTCGAACTCGTCGAGCCAG	58:C>T	0.1	0.17	16	7	170	193	2	0.18	0.04
100032172|F|0--10:C>T			TGCAGCACCGCGCACTCCATGCTCCCTTCCGCCTCCGAGATCGGAAGAGCGGTTCAGCAGGAATGCCGA	10:C>T	0.26	0.31	137	19	42	198	2	0.38	0.1
100036168|F|0--62:A>C	chr5R	821305183	TGCAGCACCGTGGCGTTGCGAGGGAGGAACACCAGGTTGGCGAGCCCAGCGCCATGCACCCCAACCATC	62:A>C	0.39	0.36	64	20	104	188	2	0.48	0.11
100071783|F|0--46:G>T			TGCAGCACCTCGTCCCTGCTGGTCGCGCTCAGCTCCTTGAGCAGCCGCTCGTACCTTTGCGCCGTCGAC	46:G>T	0.08	0.13	11	7	169	187	2	0.14	0.04
100025265|F|0--23:G>T			TGCAGCACCTGGCGTGGGAGCGTGCGCGTGCTTCGCCGAGATCGGAAGAGCGGTTCAGCAGGAATGCCG	23:G>T	0.33	0.34	53	23	122	198	2	0.44	0.12
100086764|F|0--26:C>G	chr6R	875562375	TGCAGCACCTTGGACATGTCCGCCGCCGCCAGCTTGGCGTTCTTGGCCACCAGGGCCGTGTAGCGCGCC	26:C>G	0.09	0.15	18	3	193	214	2	0.17	0.01
100062677|F|0--23:T>C	chr7R	42666154	TGCAGCACCTTGTCGGAGAACTTTTCGGAATTGAAGGCGAACTCGAAGCTGGGCACATCGGCGCCGCGC	23:T>C	0.15	0.22	159	15	21	195	2	0.25	0.08
100051330|F|0--16:T>G			TGCAGCACGAGCAGCGTGGTCGTGAGCAGCCAGCCGTTCTCCCCGCCGAGATCGGAAGAGCGGTTCAGC	16:T>G	0.18	0.25	175	1	38	214	2	0.3	0
100083952|F|0--37:C>G			TGCAGCACGAGGTGCCAGACCATGCGGTGCGGAGGTGCACGCCCCCGCCGAGATCGGAAGAGCGGTTCA	37:C>G	0.45	0.37	83	52	64	199	2	0.5	0.26
100074126|F|0--53:T>C			TGCAGCACGCCCCTCGCCGAGCTCCTCTCCGCCTGCCGGGACGCCGCCGTCCCTCCGAGATCGGAAGAG	53:T>C	0.07	0.12	171	21	3	195	2	0.13	0.11
100035604|F|0--62:C>G	chr3R	752043900	TGCAGCACGCGGTCCCGCGGCCACTGCTGGGTGAGGGGCAGCTCGAGCAGCTGCCTCCAGAACTCGGAG	62:C>G	0.05	0.09	0	22	192	214	2	0.1	0.1
100073053|F|0--17:A>G			TGCAGCACGGACGACGCACCAACATGTCAATCGCGCACGCGCACCGAGATCGGAAGAGCGGTTCAGCAG	17:A>G	0.31	0.33	47	22	121	190	2	0.42	0.12
100081782|F|0--38:A>G	chr2R	811433604	TGCAGCACGGTGACGCCGACGGTGGTGTCCAGCGGGGGACCGCGGAGGCGGCCGCAGAGGCAGACGCTC	38:A>G	0.05	0.09	4	12	182	198	2	0.1	0.06
100046870|F|0--8:G>C	chr5R	619470396	TGCAGCACGGTGTGCGTGCCGATGAACCCCGCGCCGCCCGTCACCAGCACGCTCTTCCCCTGCGCCTCG	8:G>C	0.11	0.18	186	8	20	214	2	0.2	0.04
100022936|F|0--43:C>G	chr2R	888738838	TGCAGCACGTCTTGCTGTACGAGGGCGAAGACATGCCGCCCTTCGACGACATTCTCCAGTCCCTCAGGT	43:C>G	0.12	0.18	18	5	154	177	2	0.2	0.03
100011977|F|0--67:G>A	chr6R	881575788	TGCAGCACGTGATAATCCATTAATTCACTGACACCTTCCATTTCTCTCTATATCACAAAGTTTCTTTGT	67:G>A	0.14	0.21	159	3	24	186	2	0.24	0.02
100061575|F|0--41:T>G			TGCAGCACGTGCTGCTCTACGTGGGCGCCGACATGCCGCCCTTTGACGCCGTTCTCCGAGATCGGAAGA	41:T>G	0.27	0.32	145	10	50	205	2	0.39	0.05
100013443|F|0--27:T>A	chr5R	478539498	TGCAGCACTAGTAAAATATGTGTCGGTTGACATTAGTAGTAGCAAACAAGGAGAATATTTTGCGTGCTA	27:T>A	0.06	0.1	182	2	10	194	2	0.11	0.01
100014148|F|0--32:A>G	chr2R	629567073	TGCAGCACTGAGCCACCAGTGGCTGAAACATGAAACTGACCAACTGAACTACCACTGCGACGTTTCAGG	32:A>G	0.17	0.24	27	12	156	195	2	0.28	0.06
100008384|F|0--58:A>T	chr2R	13738403	TGCAGCACTTTCCGCATGCATGCAAGCGAATTGATACTCATAATTGGCGGCGAGATCGAATCAGTTCGG	58:A>T	0.08	0.14	14	7	193	214	2	0.15	0.03
100011917|F|0--35:A>G	chr5R	683929919	TGCAGCAGAACAGGGCCAGGGAAGTAGCTGCTCTCATCGATCACCTTGGCCAGGCAGAGCGCGGCCCCG	35:A>G	0.12	0.19	21	10	183	214	2	0.21	0.05
100019420|F|0--59:A>G	chr4R	828336761	TGCAGCAGAAGCAGAATTAAGCTAGAGAAGACGAGAGGAACTGAAAATAACACCAACGGACGAAATCAA	59:A>G	0.19	0.26	29	17	150	196	2	0.31	0.09
100039370|F|0--38:A>G			TGCAGCAGAATCGACAGAGAAATCAAGAAACCAAGATGAGACGACTCGCCGAGATCGGAAGAGCGGTTC	38:A>G	0.28	0.32	40	28	125	193	2	0.4	0.15
100007980|F|0--49:C>A	chr3R	929597407	TGCAGCAGAGCCACGAGAACAACCAAGAGGACGGTGAGCGCCATGAGGACGACGTTCACCAATCCGAGA	49:C>A	0.39	0.36	126	11	77	214	2	0.47	0.05
100006910|F|0--22:C>T	chr2R	702585627	TGCAGCAGAGGCAGCAGGGCTTCGGTTACATGCTTGATGCCGTAGTAGTTGGTCTGCACGCCTTCCTTT	22:C>T	0.17	0.24	29	12	162	203	2	0.29	0.06
100065190|F|0--12:C>G			TGCAGCAGAGGGCGTGCTGGAAGAGGCCTCCTTGCCACCACGAGCATCCGGCGTGCTTGGGCCGAGATC	12:C>G	0.16	0.23	23	11	146	180	2	0.27	0.06
100020038|F|0--28:C>G	chr3R	53194906	TGCAGCAGAGGTATTCAGTTCGTTGATCCACTCTCCGATTCCAAATCGGACGAATCTGATTTTCTCTCC	28:C>G	0.23	0.29	41	5	146	192	2	0.35	0.03
100003779|F|0--35:A>G	chr1R	463113157	TGCAGCAGAGTAAATGGCACGAGCAAGAACTCGCCATGCCATTGACATGGCAATAGCTTCGACTCCGCA	35:A>G	0.24	0.3	36	16	131	183	2	0.37	0.09
100003779|F|0--54:A>G	chr1R	463113157	TGCAGCAGAGTAAATGGCACGAGCAAGAACTCGCCATGCCATTGACATGGCAATAGCTTCGACTCCGCA	54:A>G	0.23	0.29	37	7	135	179	2	0.35	0.04
100012890|F|0--38:G>T			TGCAGCAGAGTGGCAATAGGATCATCAGCTTTCTGCGGGAGAAGGTGCTGGCCGAGATCGGAAGAGCGG	38:G>T	0.22	0.29	1	89	114	204	2	0.35	0.44
100090717|F|0--35:G>T	chr2R	809278293	TGCAGCAGAGTTCTGGCCGGCCATTGTGTTAGTTAGTTAGTACCTCGCAGGCGTGGAGGTTCTCGTACG	35:G>T	0.19	0.26	38	4	164	206	2	0.31	0.02
100005080|F|0--13:C>G			TGCAGCAGATAAACTTGCTTCTTCTGTAATCTTGGGTTCCCCACGCCGAGATCGGAAGAGCGGTTCAGC	13:C>G	0.19	0.26	33	7	148	188	2	0.31	0.04
100025186|F|0--33:A>G	chr6R	456013355	TGCAGCAGATGAATCGACTGTCCAACTCAAATCACAAACAGCTTGGATTGAAAGGCTACGATGGCATAT	33:A>G	0.14	0.21	18	11	143	172	2	0.24	0.06
100013551|F|0--23:C>T			TGCAGCAGATGAGGTGCAGAATTCGCAGCTGCGGGCACGCGGCAATCACCCTCCGAGATCGGAAGAGCG	23:C>T	0.09	0.16	13	14	184	211	2	0.17	0.07
100060923|F|0--61:C>T	chr5R	811006361	TGCAGCAGATTAAAACCAACGACCAGCACCGATGCCGCGCCCCCATGGCGGTTCGTTCGTTCCGTCCAT	61:C>T	0.38	0.36	66	31	116	213	2	0.47	0.15
100054081|F|0--5:C>T			TGCAGCAGCAACGGCAACGGCAAGAGGTGGCGTTGCCCAGCGGTACGCTCCCGAGATCGGAAGAGCGGT	5:C>T	0.19	0.26	34	13	162	209	2	0.31	0.06
100017721|F|0--54:A>C	chr6R	536588393	TGCAGCAGCAAGAGATCAACTGACAGAATAGCTCTGCAACGAAAGCAGATGCAAAACAATCAAATGCAT	54:A>C	0.13	0.2	21	6	157	184	2	0.23	0.03
100032482|F|0--59:T>C	chr2R	829604523	TGCAGCAGCAATGTACTCCAAGTGGAAGAGCTACCAACTAGAAGTGTGTCACGCTATAATCACGAGGTG	59:T>C	0.15	0.22	167	17	22	206	2	0.25	0.08
100057057|F|0--14:C>G	chr5R	638972677	TGCAGCAGCACACACTCGACAGTTCACGTATCGTATCGTATGTATGTGTGGGTTAAGTTGTTGCACGGA	14:C>G	0.45	0.37	89	6	108	203	2	0.5	0.03
100012664|F|0--58:A>C	chr2R	31890672	TGCAGCAGCACACGAGCACACATCCAGCGATACTAATGGCAAAAAATCAGTTCAGAATAGTGAGATGTG	58:A>C	0.09	0.15	14	11	189	214	2	0.17	0.05
100003535|F|0--25:G>A			TGCAGCAGCAGCAACAGCATTTCCAGGCTCAGCAGCATCAGCACCAGTATTTCCAGCAGCAACCTCAGT	25:G>A	0.08	0.14	183	17	9	209	2	0.15	0.08
100006464|F|0--6:A>G			TGCAGCAGCAGCAGCAGCTTGCACCACTGACAAATTACACCGAGATCGGAAGAGCGGTTCAGCAGGAAT	6:A>G	0.34	0.35	118	25	54	197	2	0.45	0.13
100007580|F|0--22:A>C			TGCAGCAGCAGCAGGGTCTGGCATATAGCTTCCATGACCGAGATCGGAAGAGCGGTTCAGCAGGAATGC	22:A>C	0.16	0.24	28	2	148	178	2	0.27	0.01
100005129|F|0--38:T>C			TGCAGCAGCAGCGTCTTCAGCAGGAAGTTCTTCACGATTTCCGAGATCGGAAGAGCGGTTCAGCAGGAA	38:T>C	0.49	0.37	92	25	97	214	2	0.5	0.12
100000724|F|0--44:C>T	chr7R	111794301	TGCAGCAGCAGCTGAAGATGACGACTTATATAGTTAAATCCTTCCCGTTGTTGTGCCACATTAACTTAC	44:C>T	0.06	0.1	4	16	194	214	2	0.11	0.07
100033050|F|0--38:T>G	chr2R	796087754	TGCAGCAGCAGCTGCCTGCCTGCCGTTTCTTACTTTTCTGCCCATTCACACGCCTCTCTCTGCGCAGAG	38:T>G	0.45	0.37	102	6	83	191	2	0.5	0.03
100002786|F|0--27:T>A			TGCAGCAGCAGCTTGACGCACTCCACCTGGGTAGACCCGAGATCGGAAGAGCGGTTCAGCAGGAATGCC	27:T>A	0.21	0.27	141	8	34	183	2	0.33	0.04
100082463|F|0--13:A>G	chr5R	794925319	TGCAGCAGCAGGGAGGAGAGGAGACGACGATGATGGAGCCCAAGGAGGAGAACACGGCGTCCGACATGG	13:A>G	0.09	0.16	176	5	16	197	2	0.17	0.03
100009163|F|0--30:A>G			TGCAGCAGCAGGTCGAGGTCTAGAGTCTAGACAGAGACCGAGATCGGAAGAGCGGTTCAGCAGGAATGC	30:A>G	0.18	0.25	23	26	149	198	2	0.3	0.13
100051881|F|0--27:C>G	chr3R	20558035	TGCAGCAGCAGTGCTGCTCATGGTGTTCATGGAGTCTGTCTCCTGCCAGCAGCGGGAACCGACGGCATT	27:C>G	0.09	0.16	10	18	172	200	2	0.17	0.09
100052621|F|0--62:C>G	chr3R	829097618	TGCAGCAGCATTTCTCAGGGGCGACCGTCATAACGATCGCGCATCGAATCACCTCGGTCCTTCACAGCG	62:C>G	0.14	0.22	27	1	162	190	2	0.25	0.01
100009104|F|0--61:A>G	chr3R	134219486	TGCAGCAGCCACGTACCTTGGCAAGTCGTCCGATCGGAGGAACATGATGGACGCGACCTTGATGCTTCT	61:A>G	0.43	0.37	70	42	102	214	2	0.49	0.2
100041975|F|0--50:C>T	chr6R	586460582	TGCAGCAGCCACTCGATGGTCTCGCCGTCCGTCTTGTGCCCCAGCTCCCTCGTCAGCTGGAACACCCTC	50:C>T	0.08	0.14	15	3	180	198	2	0.15	0.02
100008204|F|0--32:C>T			TGCAGCAGCCATGGTCAAGACGTTCGCCCTCGCCTCCCTCTTCTTCACCGAGATCGGAAGAGCGGTTCA	32:C>T	0.41	0.37	67	26	103	196	2	0.48	0.13
100075301|F|0--32:A>G	chr5R	33591214	TGCAGCAGCCCAGCGGCACGAGGTAGGACGCCATCGGGTTCCACCCCTCGCCCTGCGCCACGTCCTCCC	32:A>G	0.19	0.26	30	21	163	214	2	0.31	0.1
100054196|F|0--52:C>G			TGCAGCAGCCCGAGTTCCGGCCGGACAAGAAGACGATGAATGCGCTCACCGTCCAGCTGCTCCGAGATC	52:C>G	0.41	0.37	112	7	78	197	2	0.49	0.04
100049090|F|0--29:G>A	chr5R	484589482	TGCAGCAGCCGCACCATCTCCTCCTCCACGTGCGCCTCGTTGGCGATGCTGGCGTCGAACACCTCGCCC	29:G>A	0.1	0.16	173	9	15	197	2	0.18	0.05
100006427|F|0--42:T>A	chr7R	531566534	TGCAGCAGCCGCCGCCATTGCTCTAGCTTTTCCCATGTGCCATACACATACCGCGCCAACTTGCCGAGA	42:T>A	0.5	0.37	95	26	93	214	2	0.5	0.12
100040642|F|0--62:C>T	chr3R	208749178	TGCAGCAGCCTGCCCGTCGTGATGCCCAGCGACAGGAACAGCAGCAGGGCCACCAGGAACGCCGTCAAG	62:C>T	0.06	0.1	8	8	198	214	2	0.11	0.04
100054561|F|0--59:G>C	chr5R	690149450	TGCAGCAGCGCAGTCGCGGACATCTGCGGGAGCCCGCCGCCCGACTCAGACGAGCTGTAGAGCGAAGGG	59:G>C	0.45	0.37	78	15	99	192	2	0.49	0.08
100052288|F|0--38:C>G			TGCAGCAGCGCGAGCATGTACTCCCCCTCGTCGCGCACCCGCTCCACCAGCCGAGATCGGAAGAGCGGT	38:C>G	0.07	0.12	13	2	181	196	2	0.13	0.01
100000422|F|0--11:G>A			TGCAGCAGCGCGCCAGTCACAAACACCAATCAATCAAGAAGTATACTACAGAGACCGAGATCGGAAGAG	11:G>A	0.09	0.15	183	23	8	214	2	0.17	0.11
100012743|F|0--47:T>C	chr4R	502280151	TGCAGCAGCGCTCAACCAAACTTGTAAGCACAAAAAACAGACACTTGTAGACACCCAAACAATCAGATA	47:T>C	0.09	0.15	191	9	14	214	2	0.16	0.04
100072099|F|0--62:G>T	chr5R	569256776	TGCAGCAGCGTCGGTCAGCGATGCGGCCTACCTCAGCGCCTCCACGCTCCTCGTTGGGGGATGTCGATC	62:G>T	0.14	0.22	27	7	178	212	2	0.25	0.03
100021684|F|0--7:G>A	chrUn	114914309	TGCAGCAGCTAATCCTGATCATGTCCTAGTGAATGTCTCCGTCTCGAGCAGAGTCCTTTGCAGAATCAC	7:G>A	0.28	0.32	48	23	139	210	2	0.41	0.11
100043882|F|0--31:C>A	chr2R	185972584	TGCAGCAGCTCAAGAGAGTGGACGACTGGCTCAACCATGTGGTGCGGCACGAGAGGATGCTTCCGAGAT	31:C>A	0.11	0.18	156	7	16	179	2	0.19	0.04
100037811|F|0--16:C>A	chr4R	680487207	TGCAGCAGCTCCCGTGCAGCCTCCCAGTCTGTGGTGTGTCCGTGGTGCCTGCTCAGGAAGTGCTGTGGC	16:C>A	0.16	0.23	157	8	26	191	2	0.26	0.04
100084754|F|0--10:G>C	chr6R	614242798	TGCAGCAGCTGGCCACCAGCAAGGGCTCCGCGCGCGACACGCTGCGCAAGCTCGGCACCAACCCGCGCT	10:G>C	0.32	0.34	51	10	114	175	2	0.44	0.06
100003204|F|0--15:G>A	chr6R	853311321	TGCAGCAGCTGGTTGGAACCGCAGCCGTTGCAGAAGTCGGGCCGTTTCGACAATGATGGCCATGCTCCG	15:G>A	0.19	0.26	137	57	11	205	2	0.31	0.28
100003204|F|0--25:C>A	chr6R	853311321	TGCAGCAGCTGGTTGGAACCGCAGCCGTTGCAGAAGTCGGGCCGTTTCGACAATGATGGCCATGCTCCG	25:C>A	0.11	0.18	154	29	7	190	2	0.2	0.15
100011423|F|0--35:C>A			TGCAGCAGCTTAGTACGTAGCAGTACATCAGTCCCCTGCAAGCTTTTATGGTAGCGACGCAAAGGCCGA	35:C>A	0.13	0.2	160	1	23	184	2	0.22	0.01
100008716|F|0--15:C>A	chr4R	186028723	TGCAGCAGGAAGATCCAGAAGCTGTCTAGCATGCCCTGACAAACCAGCATGGCCTCCTCGCTCCGAGAT	15:C>A	0.24	0.3	143	13	40	196	2	0.36	0.07
100015752|F|0--9:A>G	chr2R	905610704	TGCAGCAGGAATGCAAGCGGACGCGTCGCCAAGCAAAAACTAAGCTAATCATTGCTGCTACTTAGAAAT	9:A>G	0.14	0.21	18	13	150	181	2	0.23	0.07
100023267|F|0--51:A>G	chrUn	338726352	TGCAGCAGGAGATCCTTCTGCTGGCGTGGCGTGTTCTTACTAAAGAGAATCACAGACTTGTTCCGAGAT	51:A>G	0.33	0.34	124	19	55	198	2	0.44	0.1
100018069|F|0--67:T>C	chr6R	73590543	TGCAGCAGGCAAAGAGGAGCTCCTTGGCGGTCCACGTCACATCTGCCAGGTCACGCAACGACTCCGTTG	67:T>C	0.09	0.15	185	17	10	212	2	0.16	0.08
100038199|F|0--35:A>G			TGCAGCAGGGCGCCGACAGCGGCAACACGGGCGCCACCGAGATCGGAAGAGCGGTTCAGCAGGAATGCC	35:A>G	0.05	0.1	2	17	179	198	2	0.1	0.09
100042990|F|0--17:A>G	chr7R	735986282	TGCAGCAGGGTGGTGCCATGGAACTTGACGTCGATGTTGAAGCTGGAGAAGGAGGCGTTGACCTTGGAG	17:A>G	0.15	0.22	25	9	164	198	2	0.25	0.05
100044896|F|0--35:C>G	chr6R	409912149	TGCAGCAGGTACTCGCGATGCCCGTGCGCCGCCTGCTGCTCCTCTAGCACATATGCACGGTCGTCGTCC	35:C>G	0.11	0.18	21	7	186	214	2	0.2	0.03
100028500|F|0--64:G>T			TGCAGCAGGTATCTTTGTAGAGGTGTCATCTTAATTATCTGCCGGGAAAAGCTGGATAAGACAAGCAGA	64:G>T	0.32	0.34	94	71	25	190	2	0.43	0.37
100010997|F|0--17:C>T	chr4R	34767745	TGCAGCAGTACATGCTCCGCCTCTGCGGCTGCTCCCTCTCCATTTAATTCAATTCATGCGAGAGCTTGC	17:C>T	0.07	0.12	13	2	187	202	2	0.13	0.01
100068648|F|0--13:C>A			TGCAGCAGTACTCCGGCCGGTCGAACGCCTCGCACGCGCTCCGAGATCGGAAGAGCGGTTCAGCAGGAA	13:C>A	0.17	0.24	139	22	19	180	2	0.28	0.12
100037676|F|0--8:T>C	chr7R	34367020	TGCAGCAGTAGCAGCAGCAGCTGCTGCTGTGCCTCCAACCCCGTCCGAGTACCAATCGTCCACGCCTTC	8:T>C	0.32	0.34	111	42	41	194	2	0.43	0.22
100008372|F|0--41:G>T			TGCAGCAGTAGGCCAGCAACGAGTAGCTGACATCCGCACCAGCCGAGATCGGAAGAGCGGTTCAGCAGG	41:G>T	0.12	0.19	12	26	176	214	2	0.21	0.12
100025507|F|0--60:A>C	chr6R	714126217	TGCAGCAGTATAACTGGTCGTGTGGAGACTTCTCCTTGTAACCTTTATCAGGTTCTCTCCAATTCAGAA	60:A>C	0.32	0.34	58	14	131	203	2	0.44	0.07
100067652|F|0--35:A>G	chr2R	898747306	TGCAGCAGTATCAGTACCAGCAGATGGGCGGCCAGACAGGTGCCAGGGGGGAGCCGCTCCAGTTCACCA	35:A>G	0.22	0.29	146	16	36	198	2	0.35	0.08
100010688|F|0--18:T>C	chr4R	809397577	TGCAGCAGTATTGCACAGTCGAAATAGCTAGGTACATTACGATTGCATGCCTCAACATGCATGTCTGAA	18:T>C	0.08	0.14	161	28	2	191	2	0.15	0.15
100075694|F|0--19:G>C			TGCAGCAGTCCGCATCATGGATCTTTAGAGCCTCCCGCGCGGCCTCCGAGATCGGAAGAGCGGTTCAGC	19:G>C	0.44	0.37	48	72	73	193	2	0.49	0.37
100002992|F|0--17:A>G			TGCAGCAGTCCGTAAGCAAACAGTGATGGAATCATCCACCGAGATCGGAAGAGCGGTTCAGCAGGAATG	17:A>G	0.38	0.36	65	11	109	185	2	0.47	0.06
100017347|F|0--30:A>T	chr6R	513227700	TGCAGCAGTCTTGGAAACAGCAGCTGACACACCTCCCATGAGGAAATCAATCGCGAAGTTCTTGACACC	30:A>T	0.29	0.33	132	23	48	203	2	0.41	0.11
100022200|F|0--19:T>C			TGCAGCAGTGAAGCTGCCGTGATTGTTTGCTGTTACGGGCCGAGATCGGAAGAGCGGTTCAGCAGGAAT	19:T>C	0.1	0.16	172	21	9	202	2	0.17	0.1
100017564|F|0--10:A>G	chr5R	813089965	TGCAGCAGTGAATTCAGATTAGACCAATGCAATACTACTCTGGGCATACAGATTCAACAAGGGAAGGGG	10:A>G	0.23	0.29	43	8	152	203	2	0.36	0.04
100004219|F|0--6:A>G			TGCAGCAGTGCCGCGCCTCGCCTTGCTTGCTCATATCCGAGATCGGAAGAGCGGTTCAGCAGGAATGCC	6:A>G	0.09	0.15	5	24	163	192	2	0.16	0.12
100038687|F|0--51:C>T	chr4R	739021913	TGCAGCAGTTGTAACACGTCTTCCTGTTACACATGTGAATCAAGAGCGAGGCATTTCGGGTGGCCAAAT	51:C>T	0.35	0.35	58	4	111	173	2	0.45	0.02
100065604|F|0--28:A>G			TGCAGCATACTACGTGCCGCAGCCCAAGACCTCTAGGCGGCGCCCGAGATCGGAAGAGCGGTTCAGCAG	28:A>G	0.42	0.37	105	40	69	214	2	0.49	0.19
100069955|F|0--45:T>C	chr5R	767044213	TGCAGCATCAGACCAGGGACAAGATCGATCAACAAGAGCAAATAATGGGCGTACGTGGCGTGCACGCCA	45:T>C	0.23	0.29	37	7	133	177	2	0.35	0.04
100013153|F|0--26:G>A			TGCAGCATCCGCGCCACCATCAGCGCGATGTGCGTCGTCCCCATGGCCAAGCCCGAGATCGGAAGAGCG	26:G>A	0.17	0.24	169	11	30	210	2	0.28	0.05
100009429|F|0--68:G>A	chr5R	362959338	TGCAGCATCCTCACCTGACCCAGCTAGCACGGTCCAGGCATCCAGCTATATCTTTCCGATCAGCTCAGG	68:G>A	0.39	0.36	120	19	75	214	2	0.48	0.09
100069685|F|0--28:C>T	chr2R	574421860	TGCAGCATCGCGACGCGGCACCGAGCAACTCAGGCTCCTCGAGTCAAGTATGGTCGGTCGGCTAGCTAG	28:C>T	0.11	0.18	15	19	180	214	2	0.2	0.09
100066461|F|0--30:G>C	chr4R	474972728	TGCAGCATCGGCCACGTCTACGACGCCTGCGAGCTATGCGGGTCGCAACTTCGGCGACATCAGACGTCG	30:G>C	0.08	0.14	176	2	15	193	2	0.15	0.01
100015539|F|0--14:C>G	chr5R	483453927	TGCAGCATCTAGTACATTGCAAAATCTGGGTACTAGGTTCTCCTGGTTGGGGACTCGGTACGCCCCTTA	14:C>G	0.21	0.27	33	9	140	182	2	0.33	0.05
100009842|F|0--24:C>T	chr4R	48960242	TGCAGCATCTCGTTCCCAGCCTCACGCTGCTGCTTCTGCCGCTCTCAAGCTCGGCCTCGCCTTCGACCG	24:C>T	0.22	0.28	0	93	120	213	2	0.34	0.44
100022637|F|0--30:T>C			TGCAGCATCTCGTTGCTCCACGGGAACCCGTCAGCATCAGCGCCGAGATCGGAAGAGCGGTTCAGCAGG	30:T>C	0.21	0.28	142	21	30	193	2	0.33	0.11
100033444|F|0--58:T>C			TGCAGCATCTGATTGCACTCAGCAGCTCTTTTTCAGATGGGTGTAGGGGTTGTTGCTGTGGCCGAGATC	58:T>C	0.13	0.2	172	11	20	203	2	0.22	0.05
100068146|F|0--14:G>C	chr5R	851777895	TGCAGCATCTGCTGGGTGCTGGCCATCCCGCGCTGGAGCACGGCCATGTCGTCCCGCAGGTCGTGGATG	14:G>C	0.12	0.19	160	7	19	186	2	0.21	0.04
100082436|F|0--25:A>G	chr4R	589302909	TGCAGCATCTGGCGAGCACCCCAACATTCATCGAGGGACGGCGAGACAAGCCGCCGATATGGCGCGGGT	25:A>G	0.35	0.35	61	18	119	198	2	0.46	0.09
100058338|F|0--19:T>C			TGCAGCATCTGTCAACGGGTCCGCAGGGTTTTTCGGCGGACCATCCGAGATCGGAAGAGCGGTTCAGCA	19:T>C	0.06	0.11	170	13	5	188	2	0.11	0.07
100011235|F|0--18:G>T			TGCAGCATCTTAATAGTGGTACCCGCAAGATGAACGTGGCGATCCTCCCCGTCTTGGCGTCCGAGATCG	18:G>T	0.07	0.12	5	16	172	193	2	0.13	0.08
100006292|F|0--33:G>A	chr1R	614282579	TGCAGCATGAAGTTCAGGAGCTTCTGCTTCTCGGTGTGGCGTCCGAACATGATCTTGTCACTGAAAAGG	33:G>A	0.41	0.37	109	4	75	188	2	0.48	0.02
100003953|F|0--30:G>C			TGCAGCATGCAAACAAGTCAGGTGCATCTAGTGAGCTAAAAAACTGAACCGAGATCGGAAGAGCGGTTC	30:G>C	0.23	0.29	114	66	11	191	2	0.35	0.35
100001046|F|0--5:C>T	chr6R	464202854	TGCAGCATGCATACTGCATATGAAGTTAGCAACATCAAGCCATGCTTGGCTAGATCGCCGAGATCGGAA	5:C>T	0.16	0.23	16	27	143	186	2	0.27	0.15
100013997|F|0--12:G>T			TGCAGCATGCCGGTGGGCAACTTGCAAGACATGTTCCGAGATCGGAAGAGCGGTTCAGCAGGAATGCCG	12:G>T	0.06	0.1	0	22	177	199	2	0.1	0.11
100037264|F|0--26:T>C	chr5R	644678862	TGCAGCATGGCCTTGCCCTCGTAGAATGGCCGCACGTTATACCTCAGGTCGCACCACTCCACACGAGAT	26:T>C	0.36	0.35	107	11	58	176	2	0.46	0.06
100070506|F|0--7:T>A			TGCAGCATGGGATACGAGGGGAACCCATACATTCTCGGCGCCGAGATCGGAAGAGCGGTTCAGCAGGAA	7:T>A	0.06	0.11	181	7	9	197	2	0.12	0.04
100014581|F|0--39:G>A	chr6R	680482201	TGCAGCATGGGGCCCATGGTCATGGACGGCACCACCACCGCCAGCTCCAGCCCCCTCTTGGCCGCCTCC	39:G>A	0.44	0.37	77	69	52	198	2	0.49	0.35
100003922|F|0--30:T>C	chr6R	758957465	TGCAGCATGTCTTCCTCCACCTCCCTACCATGGCAGTCTCCCTCTTCCACCTCCCTCTTCTAACGATCC	30:T>C	0.41	0.37	102	9	70	181	2	0.48	0.05
100015591|F|0--62:C>T	chr4R	113356227	TGCAGCATTCGCAAAAAACGCAGAGCGTGTCAGGAGCAGAGCAGTCAATTTCACCGTAGCGACGCGTTG	62:C>T	0.3	0.33	49	19	130	198	2	0.42	0.1
100001111|F|0--30:A>G			TGCAGCATTCTCAAGATCTGGAACCTGAACACGCACTCCGAGATCGGAAGAGCGGTTCAGCAGGAATGC	30:A>G	0.29	0.32	45	32	137	214	2	0.41	0.15
100007329|F|0--19:G>A	chr3R	339841574	TGCAGCATTGCATTGCTCCGCGTAATCCATTAGCCTCGCTAGCTCTAAGGAACCCCATTTGGCCATCAA	19:G>A	0.08	0.14	170	13	9	192	2	0.15	0.07
100010204|F|0--27:A>G	chr3R	189444145	TGCAGCATTTCCGCTCCTACTTCCGAAAGATAAACAGGAGTACACAGGCATAGAGTCGCCATGCGCGCT	27:A>G	0.36	0.35	61	31	122	214	2	0.46	0.14
100002885|F|0--57:G>A	chr6R	733150283	TGCAGCCAAATACCACGGAGTACCTTAATTCTGAGGGTATATTCGTCATGTACAAGAGCTAGACTCAGA	57:G>A	0.28	0.32	107	56	24	187	2	0.4	0.3
100006527|F|0--61:A>G	chr7R	157682758	TGCAGCCAACTTGCCAACTAGAGTCAAGCAACTGCTAGTGGGCCAGAGGCTCTCATCAGCAAATTGGCA	61:A>G	0.1	0.16	10	18	161	189	2	0.18	0.1
100060441|F|0--18:A>G			TGCAGCCAAGGCGAGTTGACGACCCTAATGACGCAGTCAGGGAACACAGCCCGAGATCGGAAGAGCGGT	18:A>G	0.28	0.32	38	26	115	179	2	0.41	0.15
100008039|F|0--21:T>C	chr2R	74986209	TGCAGCCACAAAAAGATGCGTTGAGGGATCATGCCACCATTCTGTTGATCTACGCCATAAGAAAAGAAA	21:T>C	0.14	0.21	162	9	23	194	2	0.24	0.05
100041187|F|0--38:T>G	chr5R	826539026	TGCAGCCACAAAAGAAGCAAACTACGACGAACTGGACATGCCAGCAGATCAGACACAGGAACACAGAAC	38:T>G	0.4	0.36	66	5	102	173	2	0.48	0.03
100004026|F|0--62:G>A	chr1R	419012627	TGCAGCCACAATGTGCATCAGCCATATACTTGGGTGCATGCGGAATTTGATCGAATGAGAAGGAAATGA	62:G>A	0.49	0.37	86	35	91	212	2	0.5	0.17
100045898|F|0--34:C>A	chr3R	734909199	TGCAGCCACACACACACACACACTCAAAACGCCACCCTTCTCCGCTCCCACCACCTATAGCAACGCCCG	34:C>A	0.12	0.19	159	0	22	181	2	0.21	0
100018040|F|0--10:G>A	chr2R	148080335	TGCAGCCACAGTCGATGTCACTGGTGGATCTACAGCTCTGGGTCTTGAAGCTGTTCAGGCTCCATCCAC	10:G>A	0.24	0.3	157	13	44	214	2	0.36	0.06
100000386|F|0--24:G>A			TGCAGCCACATCATCAGTTCCCTCGTCAGAGGAAACCGAGATCGGAAGAGCGGTTCAGCAGGAATGCCG	24:G>A	0.1	0.16	182	20	11	213	2	0.18	0.09
100041186|F|0--43:C>A	chr7R	231824142	TGCAGCCACCACCTCCTGCTCCCCGCGCCGAGCGCTCCTCAAGCCCGTGGCCTCCTCCAGCTCCCCGCC	43:C>A	0.22	0.29	147	14	37	198	2	0.35	0.07
100000086|F|0--9:C>G			TGCAGCCACCCGAACACCATTTGGGAGCAAATTATCCAAGTGGATTACCCGAGATCGGAAGAGCGGTTC	9:C>G	0.12	0.19	0	51	163	214	2	0.21	0.24
100001482|F|0--9:C>G	chr6R	493875819	TGCAGCCACCGATCTGAGCGCGACAGTGCTCGCCGCGCAATAACTTGGGCCTTCATGTCTCTGGCGACC	9:C>G	0.08	0.13	14	3	181	198	2	0.14	0.02
100026857|F|0--7:A>G			TGCAGCCACCTCCTCATGAGGCGTGCCAACGAACCAGTCACAGGGCTGCCGCCCCGAGATCGGAAGAGC	7:A>G	0.23	0.29	44	10	160	214	2	0.35	0.05
100083896|F|0--32:G>C			TGCAGCCACGCCGTGATCCAGCCGAGGTAGATGAGCTCCTCCATGTCCGCCGCCCACCGAGATCGGAAG	32:G>C	0.1	0.17	180	22	11	213	2	0.19	0.1
100096578|F|0--35:C>A	chr1R	575573183	TGCAGCCACGTTGACTGTCATTCGGGTCCCTTCGTCGTGGTTTTTGTCACCCTTGATGAACAAGAGGTG	35:C>A	0.07	0.12	185	29	0	214	2	0.13	0.14
100040117|F|0--38:G>A	chr3R	153236698	TGCAGCCAGATCTTCCCGCACTTCCAGGCCAAGTCCAAGCTCCTCCACGCGCGGCTGGCCGATTCCACT	38:G>A	0.09	0.15	176	8	14	198	2	0.17	0.04
100009226|F|0--33:C>T			TGCAGCCAGCTCCAAAATAATTGGAGAAAGCGACGCCTCTGGCCCCGAGATCGGAAGAGCGGTTCAGCA	33:C>T	0.13	0.2	26	4	184	214	2	0.23	0.02
100042243|F|0--27:T>C			TGCAGCCAGGCTCTCCTCCTTCCTACTTGTAAGGTGGGCCGAGCCTAAACTCGGCCCCCGAGATCGGAA	27:T>C	0.46	0.37	104	24	86	214	2	0.5	0.11
100040713|F|0--68:G>C	chr1R	15495230	TGCAGCCAGGGGAGGATGCAGTCCTCGTGGTAGATGTGGGCGCAGGGCATCTCCCTGGCCTCGGCGCCG	68:G>C	0.13	0.2	167	4	23	194	2	0.22	0.02
100016390|F|0--60:G>T	chr6R	748037147	TGCAGCCAGGGTGGAAGCAAGAGCTTCAGAAGCGGAAAGCCGACCTCTTTTGAATAAGCGGCTGCTTCC	60:G>T	0.29	0.32	44	13	120	177	2	0.41	0.07
100010409|F|0--31:A>C	chr6R	793573034	TGCAGCCAGTAAAATAAAATAGTATGGTGTCAAGGTCCAGTCTCCAGCTGCGAGATATGAGTTAGTGAT	31:A>C	0.09	0.15	15	5	183	203	2	0.16	0.02
100068391|F|0--29:G>C	chr1R	621228621	TGCAGCCAGTACGGGTACTGCGGCATGGGGGGCGACTACTGCGGCAAGGGCTGCCAGAACGGCGCCTGC	29:G>C	0.22	0.28	38	14	155	207	2	0.34	0.07
100033527|F|0--41:A>G	chr6R	676816838	TGCAGCCAGTCGTCCCGTCCCATTTCTGTGTGTCTCTCTTCAGTACTATATATGCGGTGCAGGTAGATA	41:A>G	0.09	0.15	12	10	172	194	2	0.16	0.05
100001610|F|0--13:G>A	chr5R	50215036	TGCAGCCATCCGTGATCTCATGCTCAACTGCAAGCAACTACACTGAAAGAAGCAAGTACCATGTGAACC	13:G>A	0.16	0.23	156	10	26	192	2	0.27	0.05
100072719|F|0--15:T>A	chr4R	749626202	TGCAGCCATCGATCCTGGCGCTCCAAGGTGCCAGCAAACTGCCCCTTCCGAGGAAGATCTTTGCCGTGG	15:T>A	0.25	0.3	141	5	45	191	2	0.37	0.03
100027354|F|0--39:G>T	chr6R	648814874	TGCAGCCATCGCCACTTGTCAGCTCCGCGCCCTGCCCTAGCCCTGTTATGCAGCCGCCGCCGCCGCCGC	39:G>T	0.17	0.25	28	4	140	172	2	0.29	0.02
100006392|F|0--59:A>G	chr1R	521884450	TGCAGCCATGACAATCAGGCATCATCATCACCTCCTCTCCCTGCTATGATGATCAGTCAAGGCTGGCGG	59:A>G	0.12	0.19	20	9	175	204	2	0.21	0.04
100010435|F|0--46:T>C	chr6R	882153765	TGCAGCCATGCACCAGGAATGAGAACAATAAAACAAGATTGGATTGTTTTGCCTCTCAGTAGTACTAGT	46:T>C	0.09	0.15	156	6	13	175	2	0.17	0.03
100011352|F|0--61:C>G	chr5R	668402548	TGCAGCCATGCCCTGCCCTGCCCATGCATGCGTAGCATAGCACCGTTTTGTTTTGTTCATACGCACCGA	61:C>G	0.38	0.36	70	8	119	197	2	0.47	0.04
100048604|F|0--20:T>C			TGCAGCCCAGCGGTTGGCCGTGTGGTGGATTATGTTGCCGCCGAGATCGGAAGAGCGGTTCAGCAGGAA	20:T>C	0.12	0.19	173	29	12	214	2	0.22	0.14
100093121|F|0--25:T>C	chr6R	618091721	TGCAGCCCAGGCCCAACATGCTCCTTTTTCACCTCTTTATTTATTTACGCTGGCTTTTGCGGTGATGGC	25:T>C	0.14	0.21	158	5	23	186	2	0.24	0.03
100011828|F|0--36:T>G	chrUn	64774313	TGCAGCCCATGGTGTCAGTTGCTCACAACATGCAAGTGAACAGCAGGGCCAGGGATGACGTCCACACAA	36:T>G	0.1	0.17	176	2	19	197	2	0.18	0.01
100019371|F|0--37:A>G	chr3R	944044067	TGCAGCCCATTTGAGCCCAGCGTATACCTTTGTTATAATACATTAAGCCTTCCTATCCTTTTTGGATAT	37:A>G	0.06	0.1	9	3	166	178	2	0.11	0.02
100003520|F|0--64:C>T	chr2R	765056191	TGCAGCCCCACTCCCGTACGTCCGCTACACCCGATTCGCATGTAAACAACCAACGCCCATTGTTCCTAT	64:C>T	0.11	0.18	0	49	165	214	2	0.2	0.23
100053706|F|0--67:G>T	chr6R	519321604	TGCAGCCCCATGAAGTTTATCTCCATCAGAGGGGGACCTCCACGGCGGTACTCCTCCCAAAATGATTGG	67:G>T	0.44	0.37	103	11	81	195	2	0.49	0.06
100012987|F|0--43:A>G	chr3R	953965245	TGCAGCCCCCAGGTTTCCAAGTCTGGTATAAAGAAGAACAGGCAGTCCACTGAGTTTAAAAGAACAGTA	43:A>G	0.11	0.17	17	6	166	189	2	0.19	0.03
100013937|F|0--32:A>G	chr3R	64967777	TGCAGCCCCCCGCATGGGTTCTTGAAGATATCAACAGTTGGATGTGGTATTCTTTCTGGGCTGGGAAAG	32:A>G	0.06	0.11	6	10	166	182	2	0.11	0.05
100093104|F|0--49:G>A	chr5R	728566801	TGCAGCCCCCCGCTTTGCAAAAAGCAGGGGAGGGGATCACGTAGTATGGGGGCGCAGGCGCGCACACAT	49:G>A	0.27	0.32	124	3	45	172	2	0.39	0.02
100022657|F|0--5:C>A	chr1R	566775324	TGCAGCCCCGAAAACTTAAACATTGAATAAAGCTCTCAAAGGACAAGATACAGTAATCACCTCAGACGA	5:C>A	0.32	0.34	127	6	59	192	2	0.44	0.03
100019198|F|0--45:T>A			TGCAGCCCGATTAGAATAGCACGGCCTTCAGCCTCTTCTACACTATGGCACCGAGATCGGAAGAGCGGT	45:T>A	0.1	0.16	182	11	15	208	2	0.18	0.05
100106270|F|0--53:G>C	chr6R	674277118	TGCAGCCCGCACCTGGTCGCGCTCCACGCCGCCTTCGACGACGCCGACGCCGTGCACCTCGTCGTCGAC	53:G>C	0.34	0.35	58	28	128	214	2	0.45	0.13
100012056|F|0--43:T>C	chr3R	519086425	TGCAGCCCGCCCCAATCACGAGAACAGCACATGCACGAGCTCGTCAATGCAAAATCACACACCTCGCAG	43:T>C	0.08	0.14	187	20	7	214	2	0.15	0.09
100020268|F|0--39:A>C	chr7R	192372721	TGCAGCCCGCGCGATCTACACGCACCAACCATCACATCGAGACGTGGTTTACTCCTAACACACACTCAG	39:A>C	0.3	0.33	43	38	124	205	2	0.42	0.19
100002955|F|0--66:C>T	chr2R	133246493	TGCAGCCCGCTTTTGTGCACCCCCCAACCCATGTAGAGCGTGGAGAAGCGCAGTCCTGGCCTTGGCCGC	66:C>T	0.21	0.28	37	14	156	207	2	0.33	0.07
100003932|F|0--10:C>T			TGCAGCCCTACTTAACAGCAATACCATGGAATTCGGTATCATGAACCATGCAGTTTAGCCGAGATCGGA	10:C>T	0.31	0.33	54	11	129	194	2	0.43	0.06
100011051|F|0--68:C>G	chr6R	666845639	TGCAGCCCTGCTCCCGCAACTTGGGCACACAATCCGCCGTCATCGCTTGGACGTCGATCGCCACTATTC	68:C>G	0.07	0.12	11	5	182	198	2	0.13	0.03
100006735|F|0--28:C>G			TGCAGCCCTTCTCCTTCGAGGAATGGGACGCCCACGCCCGAGATCGGAAGAGCGGTTCAGCAGGAATGC	28:C>G	0.09	0.15	15	1	163	179	2	0.16	0.01
100015842|F|0--7:G>C	chr3R	7486591	TGCAGCCGAAGGAGCTCCCCTAGACCTGTCTCTCACACTGGCCCCCATGTCACCTTGGGCTTTTCTTCC	7:G>C	0.42	0.37	102	5	74	181	2	0.49	0.03
100061903|F|0--16:G>C			TGCAGCCGACCCTGGCGACCGAGTACGCGAGCCAGGCCGAGATCGGAAGAGCGGTTCAGCAGGAATGCC	16:G>C	0.38	0.36	105	10	61	176	2	0.47	0.06
100068129|F|0--61:G>T	chr2R	748546526	TGCAGCCGACGAAGTGGTGCGCCGTCTTGGACGCCCAGAGCTCTTCCCCCAGCCTGCTCCCGCCGCTCT	61:G>T	0.13	0.2	19	16	178	213	2	0.22	0.08
100026470|F|0--27:C>T			TGCAGCCGACTGGCCGTTTCAAGTGGGCCCCCAACGGATGCGATTCCAGAGAAAAGGGCCCGAGATCGG	27:C>T	0.11	0.18	16	17	181	214	2	0.2	0.08
100025945|F|0--11:A>G			TGCAGCCGAGCATTCTCCCTCACCGTCAGCACCCGCGCCTGCTCCGAGATCGGAAGAGCGGTTCAGCAG	11:A>G	0.14	0.21	14	33	167	214	2	0.24	0.15
100050573|F|0--18:T>C			TGCAGCCGAGGCGCGACGTGAGGGAAGGCAGCAAGGTCAACGCTTGGAGCTGGCTTTGTTCCGAGATCG	18:T>C	0.08	0.14	164	11	10	185	2	0.15	0.06
100064942|F|0--42:C>G			TGCAGCCGAGGGCCAAAGGAGCAGTCTCAAATTCAGCGTCAGCGAGGCCGAGATCGGAAGAGCGGTTCA	42:C>G	0.08	0.13	13	5	180	198	2	0.14	0.03
100036743|F|0--22:A>G			TGCAGCCGATGACCGTGAACCTATTCTGGACGTCGGAGAGCCGAGATCGGAAGAGCGGTTCAGCAGGAA	22:A>G	0.11	0.18	14	19	180	213	2	0.2	0.09
100083878|F|0--10:T>C	chr1R	707607417	TGCAGCCGATTGGCGCTGAGACGGCTCCCGTGTGCAGGTAAAGCCAATCTGTGCACGGTCGGTCCCGTG	10:T>C	0.43	0.37	105	32	77	214	2	0.49	0.15
100066937|F|0--60:G>A	chr6R	743413031	TGCAGCCGCAAAGCAAAGCCCGAACCTCGTTGGCTCCGTCTTTTTCACAGGAGGAGTAAAGCTTTCGCT	60:G>A	0.33	0.34	129	7	62	198	2	0.44	0.04
100018975|F|0--32:A>G	chr5R	730880498	TGCAGCCGCCCAACCTCGGCAGGCAACGCGCCAGAGAACGAGTTGCGATCAAGCAGCAGCTTCTGAACA	32:A>G	0.08	0.14	12	6	167	185	2	0.15	0.03
100074855|F|0--43:T>C			TGCAGCCGCCCAGGCGCTCCACGGAGAGCTTGCACCAGAACTGTGGCGCCGCCTCGCCGTCCGAGATCG	43:T>C	0.36	0.35	65	24	125	214	2	0.46	0.11
100034546|F|0--13:A>G	chr6R	524385076	TGCAGCCGCCCTCATCCATTCTCCTCGGAGCACGGGCCAGCCCACTCGGGTTGCATGGCGTCGATGGCT	13:A>G	0.42	0.37	20	117	49	186	2	0.49	0.63
100007471|F|0--14:G>T	chr3R	50117247	TGCAGCCGCGACTTGTGCCATGACAGGCATGAGCGGCGCAGGTTCTTCTGGACCAAGAAGGCCAAGAGG	14:G>T	0.24	0.3	38	10	129	177	2	0.37	0.06
100086654|F|0--10:A>G	chr6R	311614247	TGCAGCCGCTATTGTGACCGCCACGGCCGCTCGCCACATCTCCGTCGGTGTGATCCGCCACGGCCGCTC	10:A>G	0.28	0.32	121	6	46	173	2	0.41	0.03
100063775|F|0--5:C>G	chr6R	465699820	TGCAGCCGCTCCCTGGAGAAGGCGAACACGTCGTTCCACTCGGGGCCCACGGTCTTCTCGATGTGGCGC	5:C>G	0.13	0.2	25	2	168	195	2	0.23	0.01
100015726|F|0--58:T>C	chr2R	898173062	TGCAGCCGCTCTCACCTAATCATTCTCCCGTCGCCGTCGAGCTCCAGCTTAATTATTCTGCTCCTGGAT	58:T>C	0.4	0.37	105	9	70	184	2	0.48	0.05
100087804|F|0--42:A>T	chr4R	128429120	TGCAGCCGCTGCGGTTCTGCGGTGACCGTACAGCTCCTCGGCACCCCCGCCACCTCCTTATCATCATCG	42:A>T	0.29	0.32	131	18	47	196	2	0.41	0.09
100034970|F|0--37:C>T	chr5R	13553765	TGCAGCCGCTGCTTCTGGTGTCGCAGTCCACAAGCTGCTGCTCCGAGAGCGACACCAGCTCACCGAGAT	37:C>T	0.11	0.18	20	7	186	213	2	0.2	0.03
100033568|F|0--58:G>T	chr7R	600954238	TGCAGCCGCTGTGCGTTGGTCAGAGGGCTGTCATCTCGCTGTCCCTTCGGTGGTTAACGCTTCCTTGTC	58:G>T	0.31	0.34	135	21	55	211	2	0.43	0.1
100011109|F|0--29:C>T			TGCAGCCGCTTGAAGTCCCGCATCAGGCGCTTCCTCGCCGAGATCGGAAGAGCGGTTCAGCAGGAATGC	29:C>T	0.08	0.13	10	9	173	192	2	0.14	0.05
100035415|F|0--21:T>G	chr1R	574282850	TGCAGCCGTAGAGAGGGAGGTTGGTATATTTTTTCAGACCATGTGTTGAACACTTTGACGTGAGGCTGG	21:T>G	0.32	0.34	119	4	56	179	2	0.44	0.02
100044952|F|0--13:G>C			TGCAGCCGTGCGAGGCGAGCGAGAGCGAGAGCGAAGCAAAGCACCGAGATCGGAAGAGCGGTTCAGCAG	13:G>C	0.09	0.15	179	13	11	203	2	0.16	0.06
100085615|F|0--66:A>G	chr2R	81363161	TGCAGCCGTGGCCGCGGACATGACCCACGCAACCGCGAAGCCCAGGTAGATGAGGGCTAGCGCCGCAAC	66:A>G	0.24	0.3	40	17	141	198	2	0.37	0.09
100023452|F|0--20:G>A	chr3R	924019373	TGCAGCCGTGGCCGTGTGGAGAAGCCTTAGGTCCTGGTAGATTATGTACTGTTGGCCTAATCCTCCAGA	20:G>A	0.19	0.26	140	2	33	175	2	0.31	0.01
100005083|F|0--43:A>G			TGCAGCCGTTGCCATGCATGCAGCATGCTGTTGCAGTCAAATTAGGCGCCGACCACGCCGAGATCGGAA	43:A>G	0.14	0.22	23	6	152	181	2	0.25	0.03
100006692|F|0--53:C>T	chr7R	476110074	TGCAGCCTACATCTCTGATTGGTGTGTGAGCGAGGGGGCAAAGATAGGACAAACAGACCTCTGGTTCGG	53:C>T	0.32	0.34	62	12	140	214	2	0.43	0.06
100028021|F|0--7:T>G			TGCAGCCTACGGACTACCTATCCTAACCAAACTCTCGCCCCCTCTGATTTGCATGGTAGGGCCGAGATC	7:T>G	0.45	0.37	78	13	98	189	2	0.49	0.07
100009644|F|0--26:A>G	chr6R	582582676	TGCAGCCTAGCAGAACCAGATTCCTGACCGTAGCGTAGCATGGCCATAGGCGTGCACTTTGTAGAGCCC	26:A>G	0.09	0.16	18	1	179	198	2	0.17	0.01
100013056|F|0--30:T>C			TGCAGCCTCACCAGGTTGCCTCCTATGCGCTGCCGCATCAGCCGAGATCGGAAGAGCGGTTCAGCAGGA	30:T>C	0.09	0.15	184	21	8	213	2	0.16	0.1
100017613|F|0--28:A>G	chrUn	387166847	TGCAGCCTCAGGTAGTCAGGTCCGAGATAATCATCCATGAGCTGAAGCGACTCAACCGCAAAGGAGCAG	28:A>G	0.44	0.37	33	104	56	193	2	0.49	0.54
100042109|F|0--35:G>A	chr6R	510439036	TGCAGCCTCCCGTTTGCCTCCATCTTCTGGAAGAAGGCGACGGGCTTGATGACAAGGCGAAGCACCAGG	35:G>A	0.19	0.26	31	14	152	197	2	0.31	0.07
100033566|F|0--59:G>A	chr1R	61491343	TGCAGCCTCGAATTGGGGTCGGTTCCGAAGGTCTCGGCGAGGAGCTGGTAGCTCTCAACGAGCTCCAGC	59:G>A	0.16	0.23	162	5	29	196	2	0.27	0.03
100056618|F|0--54:A>C	chr4R	373680253	TGCAGCCTCGCACGGTTCCCGGCCCTGCCTCGCTTTGCTTGCACCATTGCGCCTAGCCATGGCCCGAGC	54:A>C	0.15	0.22	26	2	151	179	2	0.26	0.01
100059757|F|0--27:C>T			TGCAGCCTCGCCCTCGTTGCCAGCCAGCCGGCCGTCACGCTGACCGAGATCGGAAGAGCGGTTCAGCAG	27:C>T	0.13	0.21	23	6	165	194	2	0.23	0.03
100064350|F|0--67:T>G	chr5R	554576526	TGCAGCCTCTCCAGCACGTTCTCCGTGTTCACGTCCCTCCTAAGGCTCTCCTCGCATGCCTTCTTGATG	67:T>G	0.08	0.14	188	7	14	209	2	0.15	0.03
100005093|F|0--35:T>C			TGCAGCCTCTCTGGCAAGGTCTCCATCCCCATGCGTGACAGCAGGAACCAGATATAAGTGAGTAACTCT	35:T>C	0.41	0.37	66	17	100	183	2	0.48	0.09
100000303|F|0--9:T>G	chr2R	865564411	TGCAGCCTCTGCTGCATACACTGCAATAATGCAGAGCAACCAAAAGGGAAGTATGGTTGACCGAGATCG	9:T>G	0.1	0.17	176	3	19	198	2	0.19	0.02
100016308|F|0--7:T>G	chr1R	502559257	TGCAGCCTCTGTTGGGGGACAGTGCAGGCACTGGCAACAGATGAAGAAGCTGCTGCCGCTGGCATGTCG	7:T>G	0.14	0.21	168	3	26	197	2	0.24	0.02
100085599|F|0--41:T>C			TGCAGCCTCTTCAACCCGACGCCGTCGCTCTCCGCCATGATTGTCAACAGGTACAGGCTCAGGGGCAAC	41:T>C	0.11	0.17	9	22	153	184	2	0.19	0.12
100040784|F|0--53:T>A	chr3R	900265382	TGCAGCCTCTTGCTCACGGCAGCGCTGGTCCTAGCGCTGAGCCATGGAACCCATGGTCATGCCAGCACC	53:T>A	0.24	0.3	114	97	3	214	2	0.37	0.45
100005399|F|0--47:C>T			TGCAGCCTGAGCAGTACGTCCAGCAGGTCCTCATCGTCGGTGCTGCACGCGCCATGACCGAGATCGGAA	47:C>T	0.08	0.14	10	10	162	182	2	0.15	0.05
100027010|F|0--56:C>A	chr6R	723189164	TGCAGCCTGATAATCTGACCTTTTGATGCAGGGTGCTGCTTCCTTATATGCCCCTCCAGGGACGAGGCC	56:C>A	0.5	0.38	85	14	85	184	2	0.5	0.08
100013803|F|0--67:T>C	chr1R	154169588	TGCAGCCTGCACCTCGATCACGCCTGCCACGCCCTGCAATTCCTCTCACCCGACATACATGTGCCAGTC	67:T>C	0.38	0.36	64	22	111	197	2	0.47	0.11
100071730|F|0--41:A>G			TGCAGCCTGCCGGCTGCCGCCATTGTTAAGTCGTCCACACGACCGAGATCGGAAGAGCGGTTCAGCAGG	41:A>G	0.39	0.36	62	21	101	184	2	0.48	0.11
100020617|F|0--22:G>T	chr3R	382042840	TGCAGCCTGCGACGACGATTGAGCGATTGGGCATTACGGCTCACGGGAATGTCGCATGATCAGAGGAAA	22:G>T	0.15	0.23	4	52	140	196	2	0.26	0.27
100079873|F|0--9:C>G			TGCAGCCTGCTCGGCTCGCTCTGTCGCCTCCTCCTGCCCCCGAGATCGGAAGAGCGGTTCAGCAGGAAT	9:C>G	0.15	0.23	29	8	177	214	2	0.26	0.04
100004952|F|0--28:C>T			TGCAGCCTGGATTTATATTTTTGCAAAGCGAAAAATAAACATTGGAACCGAGATCGGAAGAGCGGTTCA	28:C>T	0.32	0.34	60	18	136	214	2	0.44	0.08
100003860|F|0--11:T>C			TGCAGCCTGGTTTTGATGGTGTCGATGGGGTAGAGCGCCGTCTCCACCACGACCCCGAGATCGGAAGAG	11:T>C	0.15	0.23	141	53	4	198	2	0.26	0.27
100025003|F|0--11:A>G			TGCAGCCTGTCATTCTCCTCCATCAGCAGCTTGTTCATCGCAGACAGCTTCCGAGATCGGAAGAGCGGT	11:A>G	0.5	0.37	92	31	90	213	2	0.5	0.15
100092965|F|0--15:A>T	chr1R	393877981	TGCAGCCTGTTGCGCATCTCTTCGTTTCGCCTTCTCTTTGGCTGGTATCGGATGTGTTATAGAGCCATC	15:A>T	0.28	0.32	45	17	131	193	2	0.4	0.09
100045484|F|0--35:C>G			TGCAGCCTTCCCTCAGGCCTCGTCCGCCTCATCTGCTCGGTGAAGCCGAGATCGGAAGAGCGGTTCAGC	35:C>G	0.11	0.18	18	6	161	185	2	0.2	0.03
100008983|F|0--24:T>C	chr3R	724974387	TGCAGCCTTTTTCGCTGAGGCTTTTTTCTCATTCTTCTTCTCCTTCCAACTATCAACCCTGTTCTTCCA	24:T>C	0.24	0.3	151	24	39	214	2	0.36	0.11
100044730|F|0--9:C>T	chr3R	850350705	TGCAGCGAACAGTTCGAGGCGCGGCATTCTCCAGCTGCATGCATATGCCGATCTGACACAGTTTGTACG	9:C>T	0.46	0.37	101	10	85	196	2	0.5	0.05
100034450|F|0--8:C>T	chr4R	705599401	TGCAGCGACAAAAGCAAATTTGATTTGATCACGGACCGACCGACCGACCAGTGCTACAAGACATGCGAG	8:C>T	0.07	0.12	12	3	174	189	2	0.13	0.02
100023620|F|0--8:C>G			TGCAGCGACAACGTCACGGTGTGGGGCCTCAACGGCGCCTCCGAGATCGGAAGAGCGGTTCAGCAGGAA	8:C>G	0.15	0.22	25	9	163	197	2	0.25	0.05
100067880|F|0--8:C>G			TGCAGCGACAACGTCACGGTGTGGGGCCTCAACGGCGCCTCCGGCTTCGCCGAGATCGGAAGAGCGGTT	8:C>G	0.14	0.21	21	7	150	178	2	0.24	0.04
100033604|F|0--17:A>C	chr7R	584587255	TGCAGCGACACCGTGCCATGCACCAACGTCACCATGGCCGAGGTCGAGCTGCTGCCCTTCAGCGGCGAG	17:A>C	0.09	0.15	11	13	171	195	2	0.16	0.07
100054924|F|0--9:C>G			TGCAGCGACCAAGGCGCCGAGTTCGTCCACGCCGTGGCGCCCGAGATCGGAAGAGCGGTTCAGCAGGAA	9:C>G	0.38	0.36	51	35	92	178	2	0.47	0.2
100039002|F|0--47:C>G	chr5R	813577425	TGCAGCGACCGCCCGCTCTCCTTCACCGCGCCGTCGGGCCAGACCGCCTGGAGCTACTACAAGATCATG	47:C>G	0.31	0.34	130	11	56	197	2	0.43	0.06
100122110|F|0--13:C>G	chr5R	39140566	TGCAGCGACGACACAGGCGGCGACGTGCAGGCGGTCTACTCGGGCATCACCGTCGCCATGGGCCACGTG	13:C>G	0.08	0.14	0	32	166	198	2	0.15	0.16
100030433|F|0--29:C>T	chr7R	219635805	TGCAGCGACGCGGGCGCCTTCTTCTGGAGCCTGCTGGGCGGGCGCTTGTTGCAGCCTAGCACCTCGCCG	29:C>T	0.3	0.33	59	11	143	213	2	0.42	0.05
100046416|F|0--46:T>C	chr6R	54398618	TGCAGCGACGGCGCCGAGTACGTACGCAACCAACTCACTCCATCCATATCTCTTGCTGCTTGGTTAGCA	46:T>C	0.39	0.36	108	10	68	186	2	0.48	0.05
100019596|F|0--52:G>T	chr4R	628363061	TGCAGCGACGTCGCTGATAAGTACTCCGCGATGGAATGCTTCACCTCCTTTGGCACGGCGATGGTCGGC	52:G>T	0.06	0.1	11	2	201	214	2	0.11	0.01
100026655|F|0--25:T>C			TGCAGCGACGTGTGGTTCAAGTACTTGCTGCCTCCGCGCAATCCGAGATCGGAAGAGCGGTTCAGCAGG	25:T>C	0.49	0.37	92	33	89	214	2	0.5	0.15
100008059|F|0--44:C>T			TGCAGCGACTCCTTCATCGTCCTCTCCGCGCCCACCATGAACTCCTTCCGAGATCGGAAGAGCGGTTCA	44:C>T	0.22	0.28	0	90	119	209	2	0.34	0.43
100031354|F|0--49:T>G	chr1R	13049348	TGCAGCGACTGTGCAGGCGATACCGAAGTCACCAAGCCGAGCACAGAAGTTGGAGTCGAGCATGATATT	49:T>G	0.1	0.17	166	29	6	201	2	0.18	0.14
100017001|F|0--46:C>T			TGCAGCGACTTCACCCTGTCCCTGCAACCCCATCCCATTTCAGGCCCCGTGAGCCACCACCGAGATCGG	46:C>T	0.31	0.34	54	9	125	188	2	0.43	0.05
100029191|F|0--24:G>A	chr1R	643019586	TGCAGCGAGACATACACACCCAGCGCTACTCAGCTCTAAAAAATGGTTTTCCTTGTCGAAACGTGTCAC	24:G>A	0.42	0.37	112	19	79	210	2	0.49	0.09
100023357|F|0--63:C>G	chr5R	795129463	TGCAGCGATCGGTAAAAATGGGAGCAGACGTGGGCTGGGCACTGCGTGTTTGGGCGATGGGCTCCATCT	63:C>G	0.45	0.37	76	7	95	178	2	0.49	0.04
100055152|F|0--52:C>T	chr1R	324897434	TGCAGCGATGGAACAGGACGCGGTGGCTCTTCCCGCTCAGGATCGTCTTCGCCCTCGTCAAAATCCTCT	52:C>T	0.21	0.28	32	16	144	192	2	0.33	0.08
100002304|F|0--24:C>T			TGCAGCGATTTGAATTTCCGATGACACGAGTGGTGTTCTTCCGAGATCGGAAGAGCGGTTCAGCAGGAA	24:C>T	0.17	0.24	22	28	164	214	2	0.28	0.13
100069922|F|0--20:G>T	chr1R	575487532	TGCAGCGCAGCCCACGAACTGATTTCCGCATTCGGTATGGTCGTACAGGGTACAGCCTGCGACGTTTTG	20:G>T	0.43	0.37	106	3	79	188	2	0.49	0.02
100075643|F|0--10:G>A			TGCAGCGCAGGAATCTGACGGCGACCATGGTGCGTTATGGCCGAGATCGGAAGAGCGGTTCAGCAGGAA	10:G>A	0.23	0.29	143	10	39	192	2	0.35	0.05
100014447|F|0--19:C>A	chr5R	850049781	TGCAGCGCAGGACATGCGACAGCCTTTACATTTGGAGTAAAGACTGTGCCCTGCACTGGCTGACTCTGC	19:C>A	0.06	0.11	171	6	8	185	2	0.11	0.03
100063204|F|0--35:G>C	chr5R	442048587	TGCAGCGCATCGCCTGGGTCGGCGACGACCACGAGGGCTTCCTCTCCAAGTTCAAGGACCGCGTCGACC	35:G>C	0.08	0.13	165	1	13	179	2	0.14	0.01
100052162|F|0--57:T>G	chr2R	854136668	TGCAGCGCCAAAGTGCGCTCTTCTCAAGAAATAAAAAAGAAGGAAAAGTGTGCCAAATAGGTGCCAAAG	57:T>G	0.49	0.37	49	78	51	178	2	0.5	0.44
100033564|F|0--59:C>T			TGCAGCGCCACGGTGCCTCCCATGGAGAAGCCGTAGAGGAACCTCTTCTTCGTCTTGTTCTCCGAGATC	59:C>T	0.48	0.37	89	27	97	213	2	0.5	0.13
100061372|F|0--28:C>T			TGCAGCGCCAGGACGATGCAGCCGCCGGCCCCCTTCTACCGAGATCGGAAGAGCGGTTCAGCAGGAATG	28:C>T	0.44	0.37	70	20	91	181	2	0.49	0.11
100017452|F|0--52:C>T	chr5R	619132914	TGCAGCGCCAGTGCGAGTACCACGCCATCCTATGCTCGAACCCTCACCCCAACCACGGCGACCGCCATG	52:C>T	0.21	0.27	35	18	161	214	2	0.33	0.08
100077824|F|0--15:T>A	chr1R	420970840	TGCAGCGCCCCAAGTTCGACTTCGAGAGGTGGGACTGGGGCTACTTCGCATGGCCGCACGACCGTCTCG	15:T>A	0.21	0.28	165	4	43	212	2	0.33	0.02
100050983|F|0--45:A>T	chr7R	759120756	TGCAGCGCCCCGAGTAAATGCTACTGCGGATTCGAACTGAGACGAAAGGGGGCCAACTCATACCACACA	45:A>T	0.08	0.13	9	11	164	184	2	0.15	0.06
100054304|F|0--67:G>C	chr4R	181106962	TGCAGCGCCCCTCCTCCCTCGTCTCTATGTGGGTTCACCAGGGCAAGACTCTCGGCGCTGTTGCACTGC	67:G>C	0.17	0.24	152	2	30	184	2	0.28	0.01
100033644|F|0--29:G>A			TGCAGCGCCGCCTCCACGATGGCCTCCTCGCAGGCCGAGATCGGAAGAGCGGTTCAGCAGGAATGCCGA	29:G>A	0.21	0.28	145	22	31	198	2	0.33	0.11
100073700|F|0--38:C>G			TGCAGCGCCGCGATGCGGAAGATCATCTCCCGCATCGCCGCCGAGATCGGAAGAGCGGTTCAGCAGGAA	38:C>G	0.09	0.15	14	5	165	184	2	0.16	0.03
100067630|F|0--29:C>A	chr2R	130459432	TGCAGCGCCGTCGGGTCCGCGCCCTGCTGCGCCACGCAGAACAGCCCCGTCGCCAGCGACCGCCTCCTG	29:C>A	0.06	0.1	197	6	9	212	2	0.11	0.03
100070211|F|0--65:A>C	chr3R	742623010	TGCAGCGCCGTCTCGTTCGCGTCCGACCTGCACACGCACCAGTCCGCCTCTGCACGCGCCCGAAAAACA	65:A>C	0.2	0.27	150	10	33	193	2	0.32	0.05
100012868|F|0--20:C>T			TGCAGCGCCTCACCAGTGCCCCACATCGGCTTCGCCTAGCCGAGATCGGAAGAGCGGTTCAGCAGGAAT	20:C>T	0.22	0.28	12	58	116	186	2	0.34	0.31
100059123|F|0--47:G>C	chr6R	671098243	TGCAGCGCCTTCATCTTCTCGTTGATCTTGCACCGCCGCCTCTTCTCGGAGAGGTTGTGCACCTCGGCG	47:G>C	0.14	0.21	164	3	26	193	2	0.24	0.02
100031053|F|0--38:G>C			TGCAGCGCGAGCTTGAGCGTGTCCATGAGCTCGTCCCCGTCCGAGATCGGAAGAGCGGTTCAGCAGGAA	38:G>C	0.3	0.33	83	126	0	209	2	0.42	0.6
100083083|F|0--26:G>C	chr7R	767243334	TGCAGCGCGAGGTTGACGCGGGAGAAGGAGGCGTCCGCCTTGGAGTCCTTGTTGATGGCGAGGAAGGCG	26:G>C	0.31	0.34	52	6	119	177	2	0.43	0.03
100064553|F|0--7:C>G	chr7R	600628447	TGCAGCGCGAGTGCCACGTGGGGCACCCCCTCAGGGTGGTCCCGCTGTTCGAGAAGCTGGCCGACCTGG	7:C>G	0.32	0.34	118	19	51	188	2	0.44	0.1
100033777|F|0--17:A>G	chr2R	624486168	TGCAGCGCGCAGAGTGAAGCAGTCAGATTGAGCGTCAGTAACTAGAGCGAGCATAGAAATGGCAACCGC	17:A>G	0.32	0.34	57	6	123	186	2	0.44	0.03
100044949|F|0--26:A>G			TGCAGCGCGCTCCGGAGCAGCACCCCAATGTGCTCCTTCTCCCGAGATCGGAAGAGCGGTTCAGCAGGA	26:A>G	0.15	0.23	23	9	148	180	2	0.26	0.05
100021951|F|0--13:C>A			TGCAGCGCGCTGGCCGAAAGCGTGAAGCACTTGGCGCCGAGATCGGAAGAGCGGTTCAGCAGGAATGCC	13:C>A	0.19	0.26	124	73	0	197	2	0.3	0.37
100015967|F|0--55:G>C	chr1R	708627629	TGCAGCGCGGCATCGTCGCCACCAACCAGACCGCGCAAAGCGTGACGTCCACGCTGCACATCATCTCAG	55:G>C	0.29	0.33	141	22	51	214	2	0.41	0.1
100051306|F|0--54:C>T	chr3R	256734812	TGCAGCGCGTAGAACCCCTCCTTCTCGGCGGTCTTGACCTGGCAGACGACATTGCCGTCGACCCAGAGG	54:C>T	0.17	0.24	25	15	156	196	2	0.28	0.08
100009553|F|0--59:A>G	chr6R	883934257	TGCAGCGCTAACGAGGAGCTCTCCATGACTTGTCCTAGTGCGCGTCTTTGGGAGCTCCTATTTGACGCA	59:A>G	0.11	0.17	12	20	171	203	2	0.19	0.1
100071385|F|0--24:C>G	chr6R	728810098	TGCAGCGCTATCTATCTCCGCGTTCAAGTGCCAGATCAGCCGCTTCTTCGTGCGTGTTCTCATGCGGTG	24:C>G	0.35	0.35	119	5	63	187	2	0.46	0.03
100007158|F|0--8:T>C			TGCAGCGCTCACTTTTGCATTTTTCTGATGTAATTTGTTGGTTACGCTTTGCATTTGCGGGCCGAGATC	8:T>C	0.2	0.27	144	18	29	191	2	0.32	0.09
100024039|F|0--18:G>T			TGCAGCGCTTCACCATCAGCTCCACCAGCACCAGCACCAGCACCAGCAGCAGCAGCATCACGTCGTGGA	18:G>T	0.06	0.11	8	11	193	212	2	0.12	0.05
100010972|F|0--46:A>C	chr5R	554795779	TGCAGCGCTTCACGGACTGTAGATCGTGAAAAATGTTAGGTTGAGTATGTTTTCACCACAGTAAGAACA	46:A>C	0.43	0.37	110	13	80	203	2	0.49	0.06
100000073|F|0--59:C>G	chrUn	75869182	TGCAGCGCTTGCCTGAGCATCCCAGAGCCACGGGGCATGCCTAATCTTTCAGCACATGCCACCATCGCC	59:C>G	0.05	0.09	2	16	178	196	2	0.1	0.08
100039744|F|0--33:C>G	chr1R	359532820	TGCAGCGGAAAGTATCGGTAACGCGCGAGGACTCGTGAAATTTGAACGTTTGAAATGCCTCCTGGTGGC	33:C>G	0.46	0.37	83	12	100	195	2	0.5	0.06
100062633|F|0--36:A>C	chr7R	581733369	TGCAGCGGAAGAGGTCGCGGCGCGCGTCCGACACGTAGGGGTTGCCCTTCCAGAACGCGTACGGCTCCC	36:A>C	0.32	0.34	134	24	56	214	2	0.43	0.11
100089054|F|0--40:G>A			TGCAGCGGAGGCGTCTGGCTGCATGGGGTCGAAGCGAGCGGACGCGCCCGAGATCGGAAGAGCGGTTCA	40:G>A	0.15	0.22	148	9	22	179	2	0.25	0.05
100089054|F|0--44:C>G			TGCAGCGGAGGCGTCTGGCTGCATGGGGTCGAAGCGAGCGGACGCGCCCGAGATCGGAAGAGCGGTTCA	44:C>G	0.07	0.12	7	11	161	179	2	0.13	0.06
100076053|F|0--59:C>T	chr5R	533527265	TGCAGCGGATGGCATCTGGCGTCGACCTCCCCGTTCCTCGAAAGAACCCAACGACGAATCACGCAGTAC	59:C>T	0.49	0.37	73	23	77	173	2	0.5	0.13
100020253|F|0--11:G>A			TGCAGCGGCAAGTTCGGGCCCGACCACCCGTACATCAACCCGAGATCGGAAGAGCGGTTCAGCAGGAAT	11:G>A	0.05	0.09	202	2	10	214	2	0.1	0.01
100054669|F|0--9:A>G	chr1R	706952549	TGCAGCGGCACAGCCACTGCCTGATGACGATGACGATCTGATCGAGTAGAGAGAGGATCATGAGTCTGT	9:A>G	0.18	0.25	33	2	159	194	2	0.29	0.01
100057656|F|0--16:G>T	chr4R	569904705	TGCAGCGGCACCACCAGTCCCCACCTCGGGGTCGCGCATGCGGTGCAGGAAGACGCTGAGGGGCAGGAC	16:G>T	0.32	0.34	51	16	119	186	2	0.43	0.09
100069913|F|0--37:C>T			TGCAGCGGCAGGAAGGGCCGTTGCTCATCCTGGGGTTCCTGATGGGCATCAACGCCGAGATCGGAAGAG	37:C>T	0.07	0.13	8	16	190	214	2	0.14	0.07
100057194|F|0--54:T>C	chr2R	655307399	TGCAGCGGCATGATTGGAGCTGAGGTATTCGCCTTCCAGAAGCTTCGCGCCACGTACCATGGACGAATG	54:T>C	0.28	0.32	137	12	51	200	2	0.41	0.06
100018305|F|0--52:T>C			TGCAGCGGCCAAGGGAACACCAGAACGTGCGTCGGCGCCATCTCCGTCACACTGCCGAGATCGGAAGAG	52:T>C	0.47	0.37	75	22	86	183	2	0.5	0.12
100013219|F|0--30:T>C	chr7R	134088866	TGCAGCGGCCATTTTTGTCTGAACTTTTGGTCACGGTCGTAGGTCGGGCACTCGCCGAGATCGGAAGAG	30:T>C	0.11	0.17	167	20	11	198	2	0.19	0.1
100050562|F|0--9:T>G	chr3R	710760547	TGCAGCGGCTGCGGCGCCCAGGCCATGGAGCCTAAGTTCGAGCTGGTTGTCCAAGACGTCGCGCTGCAA	9:T>G	0.2	0.27	39	6	169	214	2	0.32	0.03
100041621|F|0--7:G>A	chr1R	546643342	TGCAGCGGGACTCGTCATGGAGTCCTAGATTGAGATTGGAACCGCTGATGTATGTGCGCATGATCGGCG	7:G>A	0.31	0.34	126	6	56	188	2	0.43	0.03
100033776|F|0--17:T>A	chr2R	581234705	TGCAGCGGGATGGGAGATGCTAGCTAGGGATCGGAGATTTCTCTGGTGCCGTGCCGACTGCCGAGCTAG	17:T>A	0.1	0.16	185	4	18	207	2	0.17	0.02
100033776|F|0--49:C>T	chr2R	581234705	TGCAGCGGGATGGGAGATGCTAGCTAGGGATCGGAGATTTCTCTGGTGCCGTGCCGACTGCCGAGCTAG	49:C>T	0.06	0.11	10	4	175	189	2	0.12	0.02
100018465|F|0--56:T>G	chrUn	72872450	TGCAGCGGGCTGTTGCCTTCTTCAGCACTGCACGAGCCGTGAAGCACCTGCCCCGCTTTGACCAGAGCC	56:T>G	0.29	0.33	21	57	95	173	2	0.41	0.33
100055269|F|0--38:T>C	chr2R	23714251	TGCAGCGGGTGGGTAAAGGGAATGCAGTGGACGCTCGTTGACAACATCCGCGGCGATGCTCTCGCCGAC	38:T>C	0.16	0.23	149	29	16	194	2	0.26	0.15
100047032|F|0--65:G>A	chr5R	857388503	TGCAGCGGTAGTAAATGGAAGCGCGGTAGTTCCAAAACCCAAACTTTTCAACGAGAAAAGCAAACGGTA	65:G>A	0.17	0.24	141	7	26	174	2	0.28	0.04
100003165|F|0--14:G>A			TGCAGCGGTCCGTAGACGAACAATGCTGGAATCATCCACCGAGATCGGAAGAGCGGTTCAGCAGGAATG	14:G>A	0.11	0.17	164	45	0	209	2	0.19	0.22
100053569|F|0--60:G>C	chr5R	725977569	TGCAGCGGTGCAGGCCTCCGCATAAAGAAAGGGAACGTGGGCAGTCCGAGTCCAAGCAGCGCCGAATTC	60:G>C	0.19	0.26	156	8	33	197	2	0.31	0.04
100045883|F|0--33:G>C	chr1R	463105979	TGCAGCGGTGCCAGGGACGGCCACCTCGCCACAGGACACCTAGCAGGGCAGCATGTATGGTACCTACTC	33:G>C	0.37	0.36	118	5	67	190	2	0.46	0.03
100015127|F|0--63:C>T	chr3R	287231825	TGCAGCGGTTAGATGCAGATTGATTGGCAGCACGTTACAGGGAGCGGTAAACACGCAGCGCAGCGGGAA	63:C>T	0.09	0.16	15	7	173	195	2	0.17	0.04
100074814|F|0--31:T>G			TGCAGCGGTTCATGGAGAAGCGCAAGGGAAGTCTCGCCGCGCGCGCCGTCCCCTACAGCCGAGATCGGA	31:T>G	0.15	0.22	0	56	135	191	2	0.25	0.29
100060570|F|0--24:T>A			TGCAGCGGTTCATGGAGAAGCGCATGGGAAGGGTCGCCGCGCGCGCCGTCCCCTACAGCCGAGATCGGA	24:T>A	0.09	0.16	160	35	1	196	2	0.17	0.18
100050978|F|0--9:T>G	chr3R	858993551	TGCAGCGGTTGAGTTCGTGGAGCGCGTCGGGTTCTACGGCGTGCAGGGCAACCTGATCATGTACCTCAC	9:T>G	0.16	0.23	141	67	0	208	2	0.27	0.32
100043952|F|0--49:C>A			TGCAGCGTACAGAGTACAGATCGACCATCACGACCTCGAACGGCCACCCCATGTGGCCCGAGATCGGAA	49:C>A	0.25	0.31	123	11	38	172	2	0.38	0.06
100019935|F|0--41:C>T	chr7R	37856128	TGCAGCGTCACCATGAAGGCCGCCATGAAGAAGCTCCACGGCGCCACCGCCGCCATGAAGGTCCACGCC	41:C>T	0.06	0.11	6	14	194	214	2	0.11	0.07
100048853|F|0--10:C>T	chr2R	608164877	TGCAGCGTCACCCGTGCTCTGCAAAGGAATGGCGAGCCCAATGGTGGGGACTCCAATCCGCCTCAACAG	10:C>T	0.08	0.13	13	2	169	184	2	0.14	0.01
[truncated: 966 more rows]
