# Supplementary material for: A Genome-Wide Association Study Pinpoints Quantitative Trait Genes for Plant Height, Heading Date, Grain Quality, and Yield in Rye (Secale cereale L.)
Source: Front Plant Sci. 2021 Oct 29;12:718081. doi: 10.3389/fpls.2021.718081 (PMC8586073; doi:10.3389/fpls.2021.718081)
Supplement: Supplementary file 2 [file Table_2.XLSX]

## Sheet: Legend
Marker class	Description	doi
DArT	first generation presence/absence variant (PAV)	10.1007/s00122-017-2926-0
SilicoDArT	DArTseqTM PAV	this study
SNP	DArTseqTM SNP	this study
SNPe	EST-derived SNP-Marker	10.1105/tpc.113.114553
STS	Sequence Tagged Site Marker	10.1038/s41588-021-00807-0
		10.1007/s00122-017-2926-0
		10.1007/s11032-012-9736-5
		10.3389/fpls.2019.00857
Lo7 pseudomolecule	DNA sequence assembly of a Lo7 chromosome	10.1038/s41588-021-00807-0

## Sheet: L2039xDH genetic map
DArTseqTM / Marker ID	Marker class	Sequence 5' > 3'	Chromosome	Position
100073233|F|0	SilicoDArT	TGCAGGTACGTGGAGCTGGACGACGACGGCGTCCGCTTCTTCTACTACTTCATCCAGTCGGAGCGCAGC	1R	0
100131937|F|0	SilicoDArT	TGCAGCTGCGAGATGGAGCCGAGATCGGAAAAGCGGTTCAGCAGGAATGCCGAGACCGATCTCGTATGC	1R	1.72
100010210|F|0	SilicoDArT	TGCAGGAATGCTAAAGCGACGCTGAACGTGCTAAAAGGCCTCATCTCCACCATTTCCACAACCGAGATC	1R	4.05
100011288|F|0	SilicoDArT	TGCAGCCTAGTGCCACACATTTCAAAGAACGTGGCAAGCAGGCATACATAATAGACTGCATGCACTATT	1R	4.05
100005882|F|0	SilicoDArT	TGCAGCTACTTTCACGCGCATGCAAACGTAGTAAACAACCGAGATCGGAAGAGCGGTTCAGCAGGAATG	1R	6.38
100011363|F|0	SilicoDArT	TGCAGCTTATTAATTTAGCATCTTACTTTGAGCTAGAAGCGAGCCGAGATCGGAAGAGCGGTTCAGCAG	1R	6.38
100023538|F|0	SilicoDArT	TGCAGCAAAGTCAATCACTTACGGCTGTCGCATAGGCATACCAACAAACACTGGCTATGCACCACCCAA	1R	6.38
100033450|F|0	SilicoDArT	TGCAGAGTATGCAGGTGTACCTGAAGGAGGCGGAGCGGTTCAAGGACACCGACAAGACCACCGCCATTT	1R	6.38
100071731|F|0	SilicoDArT	TGCAGCCTGACCGTCGATTCAGTCACCGATGTGGACGGGGTCAGCTCCCTGCCGAGATCGGAAGAGCGG	1R	6.38
100009397|F|0	SilicoDArT	TGCAGATCCGATCACCATATCCATGATTATCACCTTCCCTCCGTCGTCCCTTGCCGAGATCGGAAGAGC	1R	7.5
100010357|F|0	SilicoDArT	TGCAGACAGCTACCTTAGTATGGAGATCCTCCTAAGAGAGTGCAGCGACGTCTTCGGATCCCTGGGCAG	1R	7.5
100012751|F|0	SilicoDArT	TGCAGCTGCATAATATCAACCCTCACCCACATCAAGAGATAAGTCTTCCACCGAGATCGGAAGAGCGGT	1R	7.5
100012751|F|0--39:T>G	SNP	TGCAGCTGCATAATATCAACCCTCACCCACATCAAGAGATAAGTCTTCCACCGAGATCGGAAGAGCGGT	1R	7.5
100017781|F|0	SilicoDArT	TGCAGAAAAGCAAAGGGTCATGGCACATCTCGAGAACCAGTCCTCTGAAACAACGCACACCATAACGTG	1R	7.5
100017781|F|0--60:C>G	SNP	TGCAGAAAAGCAAAGGGTCATGGCACATCTCGAGAACCAGTCCTCTGAAACAACGCACACCATAACGTG	1R	7.5
100035626|F|0	SilicoDArT	TGCAGGTGGTTGAGTATGCAGGCCCAACCACAGCCACAGACAATAACGAATGTAGTAATCCGATCCAGG	1R	7.5
100080333|F|0--30:C>T	SNP	TGCAGCTTGTTCCCTGAAGACTATGCAATGCCACGGGAGACCCTTGTGCGGCTGTGGGTCGCTGAAGGA	1R	7.5
rPt-399968	DArT		1R	7.5
100006644|F|0	SilicoDArT	TGCAGCAAGGAGCAGCAGCATGGTCGTCAGTGCCATACTCATTTGCTGCATGCTGGCCGTCTCAATGTT	1R	8.06
100006644|F|0--25:G>A	SNP	TGCAGCAAGGAGCAGCAGCATGGTCGTCAGTGCCATACTCATTTGCTGCATGCTGGCCGTCTCAATGTT	1R	8.06
100079108|F|0	SilicoDArT	TGCAGGTGCTCTGATGGCTATCAGGGCGACGCTTACATTGTGGACGGATGCACCAGTAAGATTTTGTGC	1R	8.06
IAG95	STS		1R	8.63
ORA14	STS		1R	9.18
100029276|F|0	SilicoDArT	TGCAGTGTCTTCTTGGAAGTTTTCCTCGTACCGTTGTCCTTCCACCCCACGCCTTACAAGCATCTGATC	1R	10.31
100051519|F|0	SilicoDArT	TGCAGGGCACACCAAATGCGCCTCGCTGTAGGAGCCATCTAGGAGCTCCATCTCGGTGAGGTTTGGCAG	1R	10.31
100010391|F|0	SilicoDArT	TGCAGGGTCGTTAGAATCCACTTGATCGATTTCTGAATATATATAGGCCTTCTCATCTTTAAATTCCGA	1R	10.87
100104637|F|0	SilicoDArT	TGCAGGATCAGCAGCAACCACTTGTTGGAGGCGTTCCACCTTCAGCAGGGGGCAGCCACAACAGGTGAA	1R	10.87
rPt-400040	DArT		1R	10.87
100076943|F|0	SilicoDArT	TGCAGCCGCCACAGGCACGCCGCACGCACCACGCACCAACGCACGCAGCGTCGCCGCCGAGATCGGAAG	1R	13.17
100001363|F|0	SilicoDArT	TGCAGTGCAACCACAGTCCACAATAAGTAAGTAAGTGCCGAGATCGGAAGAGCGGTTCAGCAGGAATGC	1R	13.72
100009085|F|0	SilicoDArT	TGCAGTGGCCTCGATCTACGGAGCCAAAAGCCAGTGAAAAGGGCCGAGATCGGAAGAGCGGTTCAGCAG	1R	13.72
100009085|F|0--28:A>G	SNP	TGCAGTGGCCTCGATCTACGGAGCCAAAAGCCAGTGAAAAGGGCCGAGATCGGAAGAGCGGTTCAGCAG	1R	13.72
100037499|F|0--5:A>G	SNP	TGCAGATGCACCCCATTCCTCCTCCTGTACACATCCACCTTGGACTCCGCGGCGACAACCACATACGGG	1R	13.72
100039971|F|0	SilicoDArT	TGCAGTGGCCTCGATCTACGGAGCCAAAAGCCAGTGAAAAGGGGCCGAGATCGGAAGAGCGGTTCAGCA	1R	13.72
100049259|F|0	SilicoDArT	TGCAGCTTGTCGTCCTTGACCGTGTGCAGCATCTTGACGGCGACCTCGTGGTACGTACCGAGATCGGAA	1R	16.05
100018302|F|0	SilicoDArT	TGCAGCTATATATCCATTTACTAGAGGAACGGGCGCTAACTGGCGGACAGAGATTGGATGGATGCATAA	1R	16.61
100026390|F|0	SilicoDArT	TGCAGACAGAGCATTCAATCTACTTCTCAACGCACCGAGATCGGAAGAGCGGTTCAGCAGGAATGCCGA	1R	16.61
rPt-507108	DArT	tgcagaggaacattattaagtctggctgcgtcccatgaaattaagaggttgctgtcaggatcaattctgatgatatagatctcctaactatgcacagacagaaaggcacaagcatagataggtgagtaatgggtgccgctgccttcttctacctcctgctgtccctctgggttcagaatgcaaccgcggctgaccttggcctcacgagaagtgattttccacgggagttcgtctttggatctgggacctcggcgtatcaagtaagcagtgtgtctatcttgtttgagctggaaatttctggcgtgttcagttaatgatgaatcttgattcttctttggcatgcagtatgagggtgctgttgctgaGgatggcaGgagcccaagcagctgggacactttc…	1R	16.61
rPt-506276	DArT	tgcagtacagtacagttcagctcagccgtacaagccattccactagccagcagagcagccatcagcgttcagcgatcagaccacatagctagtgcttcaaaccacatagtgctgcaaagtttctcaaaaagatataaagctttcgttcctcctacaaaatggatagtttgacatgctaccggcatctccccggtaatcagagttgccagcataccatgagtatccaagcagataaaatggcagttcacaaagtttctcagcaagttaagtgtctgtgtattgtcaactaagtaaagacgataaaactatgttgacggagatgaaatcattcgctgattcattaaaattatctgaacaagagagagctcaaagctcaacaaagccgaatgattacagtca…	1R	18.32
100005024|F|0	SilicoDArT	TGCAGCTCTCAAACAACAACACCATCCCACTTTTGAAACACCTCAAACAAGCTACAGCCGATTGCTTCC	1R	20.02
100015912|F|0	SilicoDArT	TGCAGCTTTATTTAACTGGACTGATTTGCTTGGATGCAGTTTGAATAACCATTATAGATCGGTTCTGGT	1R	20.02
100142092|F|0	SilicoDArT	TGCAGCTTTTTGCAAGACGAAGCAGTTATTTCACCGAGATCGGAAGACCGGTTCAGCAGGAATGCCGAG	1R	20.02
100036438|F|0--68:C>A	SNP	TGCAGTACAGTTCTCCCTAAGCTAGCAGCTGAAGAGCTGTTAGGAATAAGCCACTCCACGGTGGTGACC	1R	20.59
100037968|F|0--22:T>G	SNP	TGCAGCTCGGAGCAAGGTGCAGTCTTTCCTGGAGGCCGCGTGCTCCGAGATCGGAAGAGCGGTTCAGCA	1R	20.59
100036438|F|0--29:T>C	SNP	TGCAGTACAGTTCTCCCTAAGCTAGCAGCTGAAGAGCTGTTAGGAATAAGCCACTCCACGGTGGTGACC	1R	20.59
100006236|F|0	SilicoDArT	TGCAGTGTAGGGTGACTGCTTGGTGTGAATGACATTGCAGGCCGAGATCGGAAGAGCGGTTCAGCAGGA	1R	21.15
100006496|F|0	SilicoDArT	TGCAGTCATCAGTGCTCTGCTTCTATGTCATTGTCTCTAATGCACCACAAAGTCGTTGTCACTCCAGGA	1R	21.15
100013798|F|0	SilicoDArT	TGCAGGGTGAGCAGCAGTTTAGTCTTCCTGTTGGCTATCATGCTTAACTCAAGTGGTGTGTCTAGTATA	1R	21.15
100014968|F|0	SilicoDArT	TGCAGAGCATAGCACTAACTGACTACAGGAGCTTGCCAAGATAAGAAAGACTGAATAAACAAAAATTCC	1R	21.15
100023039|F|0	SilicoDArT	TGCAGGCCCTTGATGAAACGAAGCAATAGGTGGAGAGGCGCTCACGTCATCTCCATGGGAGCTGGACAA	1R	21.15
100025847|F|0	SilicoDArT	TGCAGTGAAAATCTTTATTCATTGTTCAGACGAGTAGACCTTCTGCTCTTTGGCTCCAAACACCAGGCC	1R	21.15
100036624|F|0	SilicoDArT	TGCAGCGTAGGTTGACTGCTCGGCCCGAGTCTAGTCGAGCATCGCTGAATCACATCCCAGGCCGAGACG	1R	21.15
rPt-402228	DArT		1R	21.15
3354237|F|0--22:G>C	SNP	TGCAGTGTAGGGTGACTGCTTGGTGTGAATGACATTGCAGGCCGAGATCGGAAGAGCGGTTCAGCAGGA	1R	21.15
100006233|F|0	SilicoDArT	TGCAGCTGATGTGGCCTTTCTACATGCATGTTTAGCCACAGCAGAGAAACACGTCTTGAATCTCCATCC	1R	21.72
100014859|F|0	SilicoDArT	TGCAGAATCCGCAACCACAATGGGAGGAACCGTTTGTCTCCCCGAGATCGGAAGAGCGGTTCAGCAGGA	1R	21.72
100034535|F|0	SilicoDArT	TGCAGGCCACCAAAGGCAAGATCGGGCGGAGGTTGCCAAGGTTGAAGAAGATGGACAGCTCTAGATCTA	1R	21.72
100035699|F|0	SilicoDArT	TGCAGCATGCAGGTTTGATCCTTCCTCTCCTCTCGGCACTAGGTGCATGCGGACAACGAAAAGCTGAGG	1R	21.72
100042043|F|0	SilicoDArT	TGCAGCACAACGTAGACGCCCGCTGCATTGCAGCTCCGAGATCGGAAGAGCGGTTCAGCAGGAATGCCG	1R	21.72
100060299|F|0	SilicoDArT	TGCAGATCGGGCTTCCCCCACTGGCTTTGCGTGCGGGCAGCTTTGGATGATGCTATATGGTGGCCAGAA	1R	21.72
100146573|F|0	SilicoDArT	TGCAGACCTCGGTCTGGCCCTCCCGAGATCCGAAGAGCGGTTCAGCAGGAATGCCGAGACCGATCTCGT	1R	21.72
rPt-402007	DArT	tgcagtcaagtcacgtgctaaaaatgttatgataaacgattaatgaatgaTgaatcacacgctcatgatatatttgtttcataaaaagagatgccacatattagagatgtgtataagtcctatatatacccctgccctagctaggatgttaaagtgaatgtgtgatattaattcagatttgtttacatctttagcttcagtccatccaaaatattggaggaaaacaaaaacatgtgagtcaatggggtgaaggaaaatgatctgaataccactggcaatgtcgggtcctgctttgccattcaacgaacactatagtgatcgtactggagttgagagttgcagtgacttggtagctcttgggacaacaacctccttggatatgatggatttaccatgcca…	1R	23.45
rPt-506340	DArT	tgGagNaNNagaGtggagggctccggcggcgGTggCtaggtttCCCcCGagtcNcccaNaggaGtcatgtggggGcatgNTGCaattttctgccgctctcGTgNcactcccaAatttgttcttatttcagtggNatgGNaAatcCAtCNtatccNaTgaggttgttgtcccAagagctaccaagtcactgcaactctcaactccNgtacGatcactatagTgttcgTtgaatggcaAagcaggacccGacattgccagtggtattcANatcattttccttcAcccCattgactcaCatgtttttgttttcctccNatatTTtggatggactgaagctaaagatgtaaacaaatctgaattaatatcacacattcactttaacatcctagctagggcagg…	1R	23.45
rPt-507719	DArT	tgcagtcaagtcacgtgctaaaaatgttatgataaacgattaatgaatgatgaatcacacgctcatgatatatttgtttcataaaaagagatgccacatattagagatgtgtataagtcctatatatacccctgccctagctaggatgttaaagtgaatgtgtgatattaattcagatttgtttacatctttagcttcagtccatccaaaatattggaggaaaacaaaaacatgtgagtcaatggggtgaaggaaaatgatctgaataccactggcaatgtcgggtcctgctttgccattcaacgaacactatagtgatcgtactggagttgaGagttgcagtgacttggtagctcttgggacaacaacctccttggatatgatggatttaccatgcca…	1R	23.45
100008086|F|0	SilicoDArT	TGCAGTACACTCTGACTGCTTGGCGTTGGAGCCAAGACGATCTATCTGATCTGGACTTGGTTTCAGGCC	1R	24
100008164|F|0	SilicoDArT	TGCAGAGTGCAGGAAGTTTCTCAGCGAGTCAAAGCTCTAGTTTCCCTTGTGAAAGGATGATTTGCCGAG	1R	24
100013899|F|0--21:A>C	SNP	TGCAGACAACGGACCAAGACTAAGTCTGGAGTTGCATGACCGTTTTGACCTAGGGCATAATGATACAAA	1R	24
100095185|F|0	SilicoDArT	TGCAGGGATGACAAAACTGCTACTCAAGTGGAACCCGAGATCGGAAGAGCGGTTCAGCAGGAATGCCGG	1R	24
100099149|F|0	SilicoDArT	TGCAGGGATGGCAAAACTGCTACTCAAGTGGAACCCGAGATCGGAAGAGCGGTTCAGCAGGAATGCCGA	1R	24
100110613|F|0	SilicoDArT	TGCAGGGATGACAAAACTGCTACTCAAGTGGAACCCAAGATCGGAAGAGCGGTTCAGCAGGAATGCCGA	1R	24
100002652|F|0	SilicoDArT	TGCAGGACATAACTGTCACTAGATACTGATAGACGACAATAAACTACATAGCAGTAACCGAGATCGGAA	1R	28.18
100002907|F|0	SilicoDArT	TGCAGTAGGTGCCAGACATGCAACTGAGACCAACCGATTGCATCTCTCTTGAGCACTACCGAGATCGGA	1R	28.18
100003570|F|0	SilicoDArT	TGCAGGGCAGGGGTCGTGATTAAGAAACTATGCACACACAGAAGTCAGGACACAGCGCCGAGATCGGAA	1R	28.18
100005079|F|0	SilicoDArT	TGCAGGACAGACCGACACACACACGTGATTATGAATCTATATGATCACATACACGTACAGTATTTACAG	1R	28.18
100006030|F|0	SilicoDArT	TGCAGTGAAAGTACGAGGCTCCTCATCGTCATTGAAAGAACCACTCGGCACTGCACGTGGCATCCTGAG	1R	28.18
100008231|F|0	SilicoDArT	TGCAGCAGTGAGTTGTGGTGCAACCCCAGCTCGTTATATGCTTTCAGACAACCGAGATCGGAAGAGCGG	1R	28.18
100008305|F|0	SilicoDArT	TGCAGGGCGCTCTAACCACAGGTCGCCCACAGTATCACGGGCCTTCCATGCTCCTCCATGTTGCTGACT	1R	28.18
100011017|F|0	SilicoDArT	TGCAGATTGTGCTGCAATGACATCTGTGACTCCACAATGCCTATGCTCACTGAAAGACCTTTGAGAGGG	1R	28.18
100011164|F|0	SilicoDArT	TGCAGTGACATACATACCCACCTCTTACTTACATGATACAAGAGATGATGATTCCGTTCCCTTGCAGAT	1R	28.18
100011205|F|0	SilicoDArT	TGCAGCACTGGTTGTTGGGGCACTCCAGCCCGCCGTTCTGCTTGCCGCACACCACAGGGCAGTCCTCCT	1R	28.18
100011338|F|0	SilicoDArT	TGCAGCTTTTGACAGTGTTGGACTAGAAAAGTTTGTCCGAGATCGGAAGAGCGGTTCAGCAGGAATGCC	1R	28.18
100013392|F|0	SilicoDArT	TGCAGGTATGACGACGTAGGGATACACCCTCTCACGATGCTTATGATTGTCTAATTTGCTTTTGTTTTT	1R	28.18
100013842|F|0	SilicoDArT	TGCAGTGATAGTCAGCGGGTTGCCTCAGCTCAACGTCAATGATACGACAAGATCCCAGTGATCCCTGGA	1R	28.18
100014791|F|0	SilicoDArT	TGCAGTTGCTGTTCTGGTGGTTTGATGTGTATTGGAGACCTCTTTTGTCTTCAGTGGTTCAGATCGGGG	1R	28.18
100015114|F|0	SilicoDArT	TGCAGCAGCATCGACATTTGCTCAAGCCAAATCTCTCCGAGATCGGAAGAGCGGTTCAGCAGGAATGCC	1R	28.18
100015200|F|0	SilicoDArT	TGCAGCAAAAATAGCAGCAGACAACACCGAACACATATACAACCAGGATCACACACGACAAGGTTCCGA	1R	28.18
100019733|F|0	SilicoDArT	TGCAGTTTATTCATAACTTCTAAAAGCTCGTCGAGGAGTCTAAAGCAACCATGCAGAGCCTTCTCATCC	1R	28.18
100022815|F|0	SilicoDArT	TGCAGTTCTTCATTCGGGCTAGGAGTTGGTGGTGTAGCCGCGTTTTCCCCTTCCCATGCATGCATGCGG	1R	28.18
100023263|F|0	SilicoDArT	TGCAGGTACTGCTTCTCCAAGGGTCGCAAGATGCGGCGCATACGCTTGCTCCCATCTATAGAAATCGCA	1R	28.18
100025981|F|0	SilicoDArT	TGCAGCAGCAGGTAAGCCACCTAATGTTTTCCCCTAGAAAAACAGAGTTGGTTGTTCGAGTGCCCACAC	1R	28.18
100033904|F|0	SilicoDArT	TGCAGGAGGATCTACACAGAGAGTTGACCCTTTCTTCCAATCCGAGATCGGAAGAGCGGTTCAGCAGGA	1R	28.18
100034614|F|0	SilicoDArT	TGCAGACAAATTGTAATTGACCTAAATCAACTAATAGCGCATGAACTAGTGTAATTGATATGAGCCAAA	1R	28.18
100036422|F|0	SilicoDArT	TGCAGAAGATAATGAGATTGGAACAATATTGAAAACATGACCAATTGTGGTGCGGCAAAGTTGTAACGT	1R	28.18
100037198|F|0	SilicoDArT	TGCAGTGGGTGTCGGTCCACTCCCCGTCCGTGAGCCGAGTCACCGAGATCGGAAGAGCGGTTCAGCAGG	1R	28.18
100039975|F|0	SilicoDArT	TGCAGTCTACTAAAGAAATCAAACAGACCGAACTGCTCAACTACAAATTTTTCAGGATTAATCTGTCCC	1R	28.18
100040203|F|0--51:A>G	SNP	TGCAGTGAAACCAACAAGTGCAGCAACAACCAGTGTTGCGGTCCCACGGGCATATGCGGCGTCGGCAAC	1R	28.18
100041923|F|0	SilicoDArT	TGCAGTTGTACAAAAACTTGCACGGGTTGAAGGACGTCGTGAGCGAACAGCATGCTGGTCGCTAGTGCA	1R	28.18
100042937|F|0	SilicoDArT	TGCAGAAGCTTAACAGGCAAGGAGAAGGACGCTCGCTCAGATTCCTTTGCCTCTTCCTCAAGCCCACAC	1R	28.18
100048417|F|0	SilicoDArT	TGCAGATTTGTCTTTTAACCTCTCCTAATGTCTCAATTCGAGCGTTGCTCCTGCTAGGAGGTTGGTTCG	1R	28.18
100049083|F|0	SilicoDArT	TGCAGCCTCATACAAGTTCTGAGGAGCATGGCGCCCACTACGCTGAGGAGGTTGCGGATGGCGAGCCGC	1R	28.18
100049342|F|0--52:T>C	SNP	TGCAGGTTGACAAACTGCGGCTTCTTGGTCTTGTGGTTGGAGAAAGACACCTTGTTGGCCCGAGATCGG	1R	28.18
100050188|F|0	SilicoDArT	TGCAGAATGGTGAGGGAGCTCATCCAAGCTGATTACTCAGATCGATCCGAGATCGGAAGAGCGGTTCAG	1R	28.18
100064104|F|0	SilicoDArT	TGCAGGTGGTACCAAGGCAGAAGCCGCTCTGGCAGCCGAGATCGGAAGAGCGGTTCAGCAGGAATGCCG	1R	28.18
100077995|F|0	SilicoDArT	TGCAGAGCACGGAAAATAATTAGAGTACCTGTTGAGTGGAATGACCAAGAGAGGAGATGGTGTGACTCG	1R	28.18
100078077|F|0	SilicoDArT	TGCAGTGGCCTGTTATATTTCACATACGTGCTTGGCGAGGAGCTGTCATGGATTGATTGACCGAGATCG	1R	28.18
100110750|F|0	SilicoDArT	TGCAGGCTGAGCTAGCAAAACTTCAGGCCAAGCACCGAGATCGGAAGAGCGGTTCAGCAAGAATGCCGA	1R	28.18
100119119|F|0	SilicoDArT	TGCAGGCTGAGCTAGCAAAACTTCGGGCCAAGCACCGAGATCGGAAGAGCGGTTCAGCAGGAATGCCGA	1R	28.18
100140864|F|0	SilicoDArT	TGCAGGCTGAGCTAGCAAAACTTCAGGCCGAGCACCGAGATCGGAAGAGCGGTTCAGCAGGAATGCCGA	1R	28.18
rPt-507848	DArT	tgcagagggaattagtttattttgttcaagtatgcgtctcctcacttgaacgattgtgaactttttatgttaagattttaacgtgcgttgcacgtgcacacttactagtattagttcgcacttacacacaaaataactttttttgcatggttacacagaaaataacttaatctagacctgatggtaaataaagaaatctagacatgtataaactacatatgtatgtaagtatcaacactatatctcataccgcaagaattatgcaaaaaaatgtactaaattaaggagaaaattatgtaccatatgcgtgtggttgcatgaCcacaattggtcattctagctggtttactactaacgtaNaccaaattgtgtttgacattgcacgtagctggtgcacaa…	1R	28.18
100011205|F|0--65:T>C	SNP	TGCAGCACTGGTTGTTGGGGCACTCCAGCCCGCCGTTCTGCTTGCCGCACACCACAGGGCAGTCCTCCT	1R	28.18
100017705|F|0	SilicoDArT	TGCAGGGAAGACTAACATATAGAAGATGCATGGCTTGAGTTCATCCGAGATCGGAAGAGCGGTTCAGCA	1R	28.73
100059518|F|0	SilicoDArT	TGCAGTACCGGCGCGCGGCGCAAGCTGGTAAGTTCGAGAGACAATGAAGAACAAAGATAGAGAAAGAGT	1R	28.73
rPt-507311	DArT	tgcagaattacatagaaatgagaaaatgtggcagtttatccaatgccatttttagctgacatgcagaactaagggtgacatgaaattatcaagtgacacacatcagagatgggtgtcagtccaatgcacaagacgctctagatttttagctttgactctgtgcttcagatttgaaaggccgtgcttgataaatgatctccaagagttggtgctgggaacctcacttcaaatttgaaaggtcactcttttgtttcatctccttacaaattagctattcctgctaccagacataaacgacagtgctagatttctgctaccaaatataaacatcgctgtactgca	1R	28.73
rPt-507452	DArT	tgcagtacagcgatgtttatgtttggtagcagaaatctagcactgtcgtttatgtctggtagcagtaatagctactccctccgtctcataatgtaagacgctttttgacactagtgtagtgtcaaaaatgtcttacattatgggacggagggagtaatttgtaaggagatgaaacaaaagagtgacctttcaaatttgaagtgaggttcccagcaccaactcttggagatcatttatcaagcacggcctttcaaatctgaagcacagagtcAaagctaaaaatctagagcgtctagtgcattgGactgacacccatctctgatgtgtgtcacttgatgatttcAtgtcacccttagttctacatgTcagctaaaaatggcattggaTaaactgccacat…	1R	28.73
rPt-410922	DArT	tgcagcagaaatagcagcagacaacactgAacacatatacaaccaagatcacacacgacaaggttcccggagtcaagcaagcctaacttgtaataactacaaaggagaagctatatttgggccgaacctgcatggtgcaaagaaagacatgactaaaatgaaaccccataaattgtggttgaattggacagcctaggacacactcaatctcacccaacattcagaacatgacatcaaccgaattggcagtactgaataattatttacttctcactactgaactataattaagtgaaaaggtaaaaagaatatgcgcatgaactgaaaatgcatatacatcttggagagcctcttcctatgtttggtgttattccagcggagtagatgttccttcccaca…	1R	29.3
100070319|F|0	SilicoDArT	TGCAGAACTAGAGGCAGCCCGTGGGGGGCACATTGGTCGCCGAGATCGGAAGAGCGGTTCAGCAGGAAT	1R	30.42
rPt-399662	DArT	tgcagaGaacgaacggatgtgcacctcactgctgaattacggagttatacagggtgttttctgcgttctttccaatgcaaacccagccttgtcaatcacgtgcgttccgtccagatccaacggcccacatagtcccgtatcaggggatcatgtcacgattggtatcaccagatatgcactcgcttagctcctatgtgtcttgcttctgcacacccctgtttttttccccccattctagttttctctttccaccttcacaaaatttgagaaaactttttcttttcatcaagtttgattgctcatcacactgtcacacatggtaaacgggagtaaaatgtttgactgca	1R	30.42
tcos206-1R	STS		1R	30.42
100080034|F|0	SilicoDArT	TGCAGAGACTGAGCGCAGGTTCGGCAGTGGATTCAGATGGTGGAGCCCGAGATCGGAAGAGCGGTTCAG	1R	30.99
100002051|F|0	SilicoDArT	TGCAGGCTCATCACACAACTTCCAGCCAAGGTCGAAACCTTTCCATCCTTCAATTCTTTGCAGGGCCGA	1R	31.56
100002051|F|0--58:T>C	SNP	TGCAGGCTCATCACACAACTTCCAGCCAAGGTCGAAACCTTTCCATCCTTCAATTCTTTGCAGGGCCGA	1R	31.56
100002477|F|0	SilicoDArT	TGCAGCAACTCACCACTTCCTAAAGGCAGCTCCAAAAGAATCCGAGATCGGAAGAGCGGTTCAGCAGGA	1R	31.56
100003457|F|0	SilicoDArT	TGCAGCAAATTTCAGACAGTCATCCAAAGAGCTGAACTGAATTTCTGCACATACATGCATACCCAAAAC	1R	31.56
100004285|F|0	SilicoDArT	TGCAGCTCATCTAGATGAACGTAGTACAGGCGTATAGAGCAAATCATTCTTTCCAGCTCCGAGATCGGA	1R	31.56
100004443|F|0	SilicoDArT	TGCAGCAAATTTCAGACAGTCATCCAAAGAGCTGAACTGAATTTCTCCACATACCCAAAACCCGAGATC	1R	31.56
100006614|F|0	SilicoDArT	TGCAGCCAATCGACGAATCAAACAGCTGCAAGGGCAATACTAGGCTCATGATGTATGAACTTGCACTAC	1R	31.56
100006744|F|0	SilicoDArT	TGCAGTTTATGCGGATTGTATTGATCTGGTGACGGAAATAGGAACGGTTCAATACTTGCACTGTCTCCG	1R	31.56
100006864|F|0	SilicoDArT	TGCAGTTTTACCAGCTCAACAATGCCAGCTGGTAACTCTTGTACATCTGTATTCCGAAGATCTAGCGTC	1R	31.56
100009300|F|0	SilicoDArT	TGCAGCGCCGAAGACTAGGATTTTGATTCGATGAGCCTCCGAGATCGGAAGAGCGGTTCAGCAGGAATG	1R	31.56
100010863|F|0	SilicoDArT	TGCAGGTATCCCTCTTCAGCATAGGTTCCACATCCTCCACCGAGGCAGGCCTTTCCGCATCCTCCAACG	1R	31.56
100012700|F|0	SilicoDArT	TGCAGGACAGAGACATAGTACATCCTACCGCGGCATCCCATACACAAAATCTCGCCAAAAATATGTGAG	1R	31.56
100017871|F|0	SilicoDArT	TGCAGGACACAGCAGCCTCCTTGGCGTAGCTGCCTCATAGGTTGACCATATAGATCTTCTCGCCCGAGC	1R	31.56
100023804|F|0	SilicoDArT	TGCAGTTTCGCCGCATTCCGTGAAGGCGGTCCTTAAGAGAAATTAATCACAAGTCCTAATTTGACAAGA	1R	31.56
100027327|F|0	SilicoDArT	TGCAGAGCAGATCGGTTCAGTCTAGGTGGGTGCTAACACAAATGGACCAACTTGTCAACATAAGAATTC	1R	31.56
100027327|F|0--34:A>C	SNP	TGCAGAGCAGATCGGTTCAGTCTAGGTGGGTGCTAACACAAATGGACCAACTTGTCAACATAAGAATTC	1R	31.56
100029804|F|0	SilicoDArT	TGCAGCTGAACAAAAGCCAGGAAAGAAAGACAGAAAAGACGCGCAAATTACGAGTTGGCGCCGAGATCG	1R	31.56
100036731|F|0	SilicoDArT	TGCAGGAGCCTGCCACGTATACGTAATAATCGTCGTGTGCATTCCTCTTTCGTTCTTGGTTGGAATCTT	1R	31.56
100038760|F|0	SilicoDArT	TGCAGCAGCGAGTTCTTTCATCATGCTCCAACTTCCGCACCTTCGATCATGCGCCGAGATCGGAAGAGC	1R	31.56
100045540|F|0	SilicoDArT	TGCAGGTAAAACACTGGTGGGGCTGTTTCTCGGCAGCAAAAGCGTCGCCAACCTCCTCCCCAAGGAGGA	1R	31.56
100045851|F|0	SilicoDArT	TGCAGTGCTGTTGCATGATTCCGATTCAGGTTTGGTTCGGCAAACATTGGATTTCCTGTTAGAGTAGGC	1R	31.56
100048179|F|0	SilicoDArT	TGCAGCGGTGCAGCGGTGCAGCCGCTGTGCAATGTGTGCTCGTTCCCGACCCGAGATCGGAAGAGCGGT	1R	31.56
100056497|F|0	SilicoDArT	TGCAGATCTGCTTGGAGGAAGCGGAGCTTCTTCGTCTCCTCCGCCCGAGATCGGAAGAGCGGTTCAGCA	1R	31.56
100057425|F|0	SilicoDArT	TGCAGTTTGTTATACGGACAGACAAGTGCGGGCCTGCGCGTTGCTGCCGAGATCGGAAGAGCGGTTCAG	1R	31.56
100057517|F|0	SilicoDArT	TGCAGCCGCCAAGATAGGCTTTGTGCCGTTGAATTGCTTCCTTGACGCGAGTCCTGAACCCCGAGATCT	1R	31.56
100072792|F|0	SilicoDArT	TGCAGAGCCCGCTGCTTGCGGCGCCGCCGATGCCAGCACCGCTGGCCGAGATCGGAAGAGCGGTTCAGC	1R	31.56
100079730|F|0	SilicoDArT	TGCAGGCCACGAAGACGCAGGCCAAGTCCTCACACGGCGACCCGAGATCGGAAGAGCGGTTCAGCAGGA	1R	31.56
100094455|F|0	SilicoDArT	TGCAGTGCAGCCGTCGGCGCTGCGTTGGAGCACGGCATGCCGGTGTCACGGTTGCATTGAAGCATGGCC	1R	31.56
100098207|F|0	SilicoDArT	TGCAGTGCAGCCGTCGGCGCTGCGTTGGAGCACGGCATACCGAGATCGGAAGAGCGGTTCAGCAGGAAT	1R	31.56
100100577|F|0	SilicoDArT	TGCAGCGACAAGTATCCACATATAACCCGAGATCGGAAAAGCGGTTCAGCAGGAATGCCGAGACCGATC	1R	31.56
100105983|F|0	SilicoDArT	TGCAGCGACAAGTATCCACATATAACCCGAGATCGGAAGAGCAGTTCAGCAGGAATGCCGAGACCGATC	1R	31.56
100118320|F|0	SilicoDArT	TGCAGGTCCTAAGTTGCAAACATATTGTGCGGATCCAGCGTAGGGTCGTGTAGGGGCGGCCGCACCGAG	1R	31.56
100122123|F|0	SilicoDArT	TGCAGCGACAAGCATCCACATATAACCCGAGATCGAAAGAGCGGTTCAGCAGGAATGCCGAGACCGATC	1R	31.56
100143766|F|0	SilicoDArT	TGCAGCGACAAGTATCCACATATAACCCGAAATCGGAAGAGCGGTTCAGCAGGAATGCCGAGACCGATC	1R	31.56
100144649|F|0	SilicoDArT	TGCAGCATACTTACCGACTTACCAGCGGCGCGCGCGGTAGGCGGAGCTTGGACCCAGATCGGAAGAGCG	1R	31.56
100040945|F|0	SilicoDArT	TGCAGTTTTTTCTTCTTCCCTGAGCTTGAGACACAACACGCCGCCCAGGGCCGAGATCGGAAGAGCGGT	1R	32.12
rPt-509009	DArT	tgcagagttgaatacgcaaaacatgtcggggtgctttgctgaagaaaccttgcgcccaactcccttacacctgaaaatactcaggtaaaccaaacagaaaagaattacaattacctcagatggcatgcattaatgttgttttaaatggataagctgaaaataaacaagacaacaatactcaggtaaaccaaacagaaaagaattacaattacctcagatggcatgcattaatgttgttttaaatggataagctgaaaataacaggatatgatgctatcatgaagctaatagatgtagtagctccaaccagagacaaacccttgggaacaataagtcaatgccaaataaaactcaaaaaggaaaaggtccaaggtaaagtagcaacacccgaaattatct…	1R	32.68
100009308|F|0	SilicoDArT	TGCAGTTCGATCTTGTGCTCACTGCACACTCTCACCTAGGACATGTGTGCACGTATCCAACAGCCGAGA	1R	33.24
100019571|F|0	SilicoDArT	TGCAGACACTGGACTTACGAACAGGAAAATCGGTGGAGCCGAGATCGGAAGAGCGGTTCAGCAGGAATG	1R	33.24
100051737|F|0	SilicoDArT	TGCAGGCGACACGGGCGGCGACACCATCTGCGCGAACTCTGGCCCTCGTTGTCTGCTGCTCCTACTCGC	1R	33.24
100082091|F|0	SilicoDArT	TGCAGGTTACAATGTCGGCTGCTTCTTTGTTGCTTCGCTTGGCTTCTTTCTATATACGTCTTGATCAAC	1R	33.24
100093410|F|0	SilicoDArT	TGCAGCACGTCGTTTGCACCCGCATGGGTTCCGCTCGGCCAGCCACCACCGAGATCGGAAGAGCGGTTC	1R	33.24
100108868|F|0	SilicoDArT	TGCAGTGGCGGTGAGAGGCGGAAGGTTGACGCTGCATGACAGGAAGAAGCAGAATGCTCTCTTGTTGGT	1R	33.24
100112866|F|0	SilicoDArT	TGCAGCGCCCTCGCTCGATTTGATCCCACAACCGAGTGGTAGGTTCTTAATCTAGGAAGGCTACAAGAC	1R	33.24
100001061|F|0--49:G>C	SNP	TGCAGACTGGCACACAATCGGCAGATGTGATTGAGAGCGTGATGTTCACGTACAGATTCAAGGAGGACC	1R	33.8
100004942|F|0	SilicoDArT	TGCAGGAGCTCTGCTTTTTCGTTAAAGTAGTGGGAAAACTGTACAGGGCTGTGTACAGCCGAGATCGGA	1R	33.8
100012424|F|0	SilicoDArT	TGCAGAGGATAGTTAATAGGGCCTCCGCACTGAAAACATGATTAGCAAGGGGGCACGTCATTATGCATA	1R	33.8
100012424|F|0--13:T>G	SNP	TGCAGAGGATAGTTAATAGGGCCTCCGCACTGAAAACATGATTAGCAAGGGGGCACGTCATTATGCATA	1R	33.8
100020194|F|0	SilicoDArT	TGCAGCCCCATTTTCCTGCTGCTCCGCTTGCTAAATCCACTCACTCAATGAGCTTAATTGTGTAGATCT	1R	33.8
100029829|F|0	SilicoDArT	TGCAGGTTTGAGTGAGTGTTGCCTTGGTGTGGAGGCGTCTAGCAGCTGGTGTGCCCTCTCCACAGTGGC	1R	33.8
100030815|F|0	SilicoDArT	TGCAGCCCCCATCAACCAGAATGAATCAATCAATCTGCGGACAAAATCAACATCTATAGCGCGCGCGGC	1R	33.8
100037023|F|0	SilicoDArT	TGCAGATTAAGACAATTTGAGTATCGCTAACTAATCTAAATTGTTCTTTAAGTGAGTATATATGGAAGG	1R	33.8
100037718|F|0	SilicoDArT	TGCAGGTAGAGCTCGTCCGTCAGCGACGCTGACAGCGACAGCGTACGTGCGATTTGGAAGACCTTGTCG	1R	33.8
100053138|F|0	SilicoDArT	TGCAGCACGTTAACTGCATCATGTTCCGCATCGGGCAGCCCAGCCTTGCTTTCTTGCACATTTGTGAAT	1R	33.8
100114684|F|0	SilicoDArT	TGCAGATCTCTCTTTTGCTCACATTTGCGCCGAGATCGAAAGAGCGGTTCAGCAGGAATGCCGAGACCG	1R	33.8
100119288|F|0	SilicoDArT	TGCAGGCGCGACCCAGTCGCGCACACAAGCCCAATATTCGCTACTGCGGCCCGAGATCGGAAGAGCGGT	1R	33.8
100130004|F|0	SilicoDArT	TGCAGGCGCCGACCTGCACGAATTATCCAATCACCGAGATCGCAAGAGCGGTTCAGCAGGAATGCCGAG	1R	33.8
100130833|F|0	SilicoDArT	TGCAGGAGCTCATGGTTGTTGCAGCCGCCGTCGCCGAGATCAGAAGAGCGGTTCAGCAGGAATGCCGAG	1R	33.8
100136193|F|0	SilicoDArT	TGCAGATCTCATTTTTTGCTCACGTTTGCGCCGAGATCGGAAGAGCAGTTCAGCAGGAATGCCGAGACC	1R	33.8
OSEC	STS		1R	33.8
rPt-505764	DArT	tgcagttttaaggtgtgtaccatagatcattacactccgaaatctttaaaatggtttacagctatacggctcctctggaatgaattcAccaaaatcagcttttgagtcctctccgtttgaccctgaaattggctgctatgactgcgaatagtccacaggagatataatccaactaaaaactatacagaaaacagaAAaaactactccctccgcCccataatataaaacgtttttcactcgtgtagtgTcaaaaagagtcttgcAttatgagacGGAGggagtaaTaGaCaacatatgaAgccatggtctctatattgttttatgaaaagtcggtaacatttacctgcGgtccagatatattcatatgtataatttgctattcttacaactgctaggttg…	1R	33.8
100016087|F|0	SilicoDArT	TGCAGCAGAGGTAGATGCATTGCACTCCATACCTGTAAATTAAGTTGCAAACATACACTGGTACACGCA	1R	35.54
100054061|F|0	SilicoDArT	TGCAGCGAACGGCCACTTTAACGATCTTTACTGTAGAATGAGCGTTAATCCGAGATCGGAAGAGCGGTT	1R	35.54
100085094|F|0--28:T>A	SNP	TGCAGTGGGGTCGTTGCGGGCCAATCCATCGTGGCCCATATTCGTCTCATATTTGAGCTGGATATGAGG	1R	35.54
100001706|F|0	SilicoDArT	TGCAGCTTCTCCACATTATGCTCAAATCTTGTTTCTCTTTCAACATGCAGCATCCGAGATCGGAAGAGC	1R	36.1
100004826|F|0	SilicoDArT	TGCAGACCTGGCCTCCCTACATCTGTTGAACAAGTAGTTCCGAGATCGGAAGAGCGGTTCAGCAGGAAT	1R	36.1
100005548|F|0	SilicoDArT	TGCAGCACTATGTATACTCCTACATGTAATTCCCTGAGACTTGATAGTGGTACTCCTAGTAGTTTGCTA	1R	36.1
100018185|F|0	SilicoDArT	TGCAGTCCATCGCCATGCTCATACCATGGATGATATGGAAGCAACGGAACTAATGTGTCTTTGAAAATG	1R	36.67
100005879|F|0	SilicoDArT	TGCAGGACAATCTACAGTCACCATCATCTGGTCAATCGGAAATAGATCACCACCACGAACCAAAGATCG	1R	37.23
rPt-400359	DArT	tgcagaaatgCAGCCCAGTTgCCAtttttacccatgctaaaatgctataaactcaGaaccctgtcctggtaGcaagtatcaagtttttaccaatgaggtcttgactttaccaacgtattggcctgtattatgtttcaagtanagtgcatcagaccatacatcatgagtgaactcactttgatatatcatcaggcggtctgcacataagctggaatgtttgatcttctcggtgttctgcttgcgtgcanagcgatctgctccaggtcgttcanccttttggcgtggtanccaagttcgtcatgctccgtgccaaaaatcaaganccctttc	1R	38.35
rPt-390307	DArT		1R	38.91
100050039|F|0	SilicoDArT	TGCAGGCCTTGGTTAATACGGATCCAGCAAAGAAAAAGAAGTACCACGACCCGAGATCGGAAGAGCGGT	1R	39.46
100026750|F|0	SilicoDArT	TGCAGCAGTAGCGCGCGCTGCCGTATGCGTTGCACGCGCTCTTGCAGGCCACCACCTCATCACCGTTTG	1R	41.17
100026750|F|0--13:C>T	SNP	TGCAGCAGTAGCGCGCGCTGCCGTATGCGTTGCACGCGCTCTTGCAGGCCACCACCTCATCACCGTTTG	1R	41.17
100067961|F|0--19:G>C	SNP	TGCAGACGCTGCTCATCCTGCTCCTCAGCCGCGTGCTCGCCCTGCTCCTCCGCCCGCTCCGCCAGCCCA	1R	41.17
100017856|F|0	SilicoDArT	TGCAGGATGCTCATGTTGTAGCTTACAGTGCCAGGCAACAATCTTCTGTTGATTACAGTGCCGAAAACT	1R	41.74
100039319|F|0	SilicoDArT	TGCAGAGCGCCACCCTCCTTGGTCCTACGGTGAGATGTAGCGCCGAAGCCGAGATCGGAAGAGCGGTTC	1R	42.3
100136815|F|0	SilicoDArT	TGCAGAGCGCCGCCCTCCTTTGTCCTCCGAGATCCGAAGAGCGGTTCAGCAGGAATGCCGAGACCGATC	1R	42.3
100034606|F|0	SilicoDArT	TGCAGAGGCTAGGGCTATTTCTCCACTCCACCTCAACGCGAGCGATTCCTGGAGCTCCGAGATCGGAAG	1R	43.42
100015274|F|0	SilicoDArT	TGCAGGTCTGGAACTCTAGACCTGCAATAAATTGGAGCAGTTGCGGCATCCTGAAGCTGGCGACCTAGG	1R	43.98
100021956|F|0	SilicoDArT	TGCAGCATGCCAGTGGCTATGACACGTCCGAGAGTGAGTGTGTACATATGTGGCTGTATATAGACAATG	1R	43.98
100023265|F|0	SilicoDArT	TGCAGCGTGGAGTCCCGTGGCGAGGCCGCAGTTTCGATGATGGAGGCCATCATGTGCACCGAGATCGGA	1R	43.98
100035373|F|0	SilicoDArT	TGCAGCAACACGGCTACGACGCAGCTGTACTGGAAGATGGTCAAGGAGAAGCTTTTCTTCCCTCAAGCA	1R	43.98
100068930|F|0	SilicoDArT	TGCAGCACCACTACGGCGAGATCCTTGGGCGGGCAGAGCACCACCGAGCTCGCCGACGAGCAGCAGCCG	1R	43.98
100069802|F|0	SilicoDArT	TGCAGTCTGGCCGCGTAGTTCGTGTTAGAGCGCAAGTGTGCATGAGCCGAGATCGGAAGAGCGGTTCAG	1R	43.98
100100756|F|0	SilicoDArT	TGCAGCCCGTTGAGGAGAAGCTCCGAGATCGAAAGAGCGGTTCAGCAGGAATGCCGAGACCGATCTCGT	1R	43.98
100113393|F|0	SilicoDArT	TGCAGCCCATTGAGGAGAAGCTCCGAGATCGGAAGAGCAGTTCAGCAGGAATGCCGAGACCGATCTCGT	1R	43.98
100134176|F|0	SilicoDArT	TGCAGCCCATTGAGGAGAAGCTCCGAGATCGGAAAAGCGGTTCAGCAGGAATGCCGAGACCGATCTCGT	1R	43.98
100141122|F|0	SilicoDArT	TGCAGGCCGTTGAGGAGAAGCTCCGAGATCGGAAGAGCGATTCAGCAGGAATGCCGAGACCGATCTCGT	1R	43.98
IA-215	STS		1R	43.98
100055082|F|0	SilicoDArT	TGCAGACACACACGCACACCACTACTGCCCATCTCGCCCAGCTGCGCGCGCGATCCGCACGCCACACCG	1R	45.11
100005803|F|0	SilicoDArT	TGCAGAGCAGTTAAAATCTCTAAACAAGTTGAACCTTTATCAATTCCTCTTGCAAAAGGATGATTCCAC	1R	46.25
100016853|F|0	SilicoDArT	TGCAGTTTAGTCATCTGTTGAATCTTGGATGAAACTGACGAACTGAATTTTCTGAATCTGACCAAACTG	1R	46.25
100017340|F|0	SilicoDArT	TGCAGGCTCAAGCCCTGGGGAAGGATGTTTGTGATATGCCTCCCTGATGGCTGCTCTGCTGCTGCTGGA	1R	46.25
100017869|F|0	SilicoDArT	TGCAGGTGTCTTCGGTTCCAACAGCAATGTTAGCTTAATCCAAACATATTAGTTTACAAGTTTGCGTTT	1R	46.25
100020334|F|0	SilicoDArT	TGCAGTCTGGCCGTGTAGTTCGTATTAGAGCGCAAGTGGGCATGAGCCGAGATCGGAAGAGCGGTTCAG	1R	46.25
100020979|F|0	SilicoDArT	TGCAGGACTCGCTGGATGGATGTGAATGTGAGCAACCAAGCTATCTTTTTTTATTGTTCACAAGATAGG	1R	46.25
100025445|F|0	SilicoDArT	TGCAGACAACATACAGCCTGATAAGCTTGCACATTTCCAAGAAAAATGCCTCATCGTTCAATCTGAGAG	1R	46.25
100026505|F|0	SilicoDArT	TGCAGCTAACTAGGAGCCAAACAACTAACTAGGACCTAAACACAGCAGCTGGCAAAACTAGTGGCATCG	1R	46.25
100033022|F|0	SilicoDArT	TGCAGTGGCCGATCTCCAGCGAAGCCTTGCTTCCTGCCGCCAAGGGAAAAAAAATCTTATATGACCGAG	1R	46.25
100036390|F|0	SilicoDArT	TGCAGTGATCTTGCATCCACGAGTTTGCCAGAGCAGTCACCTTCACCCGAGATCGGAAGAGCGGTTCAG	1R	46.25
100072325|F|0	SilicoDArT	TGCAGCTGTATGGGTGTAGGTTGTGGTGTCCTTTCCTCAAGTACCGTCGGAGGCGACGCGGCGCTTCCT	1R	46.25
100074081|F|0	SilicoDArT	TGCAGCCGCCAGAGGAGCAGAGCAGCAACAGGCGGTGGCCGAGATCGGAAGAGCGGTTCAGCAGGAATG	1R	46.25
100078410|F|0	SilicoDArT	TGCAGCAAGACGGATGCTGCTCCTCACTGTAAGCGAGGTATAGTTCTCGCACGCCCGAGATCGGAAGAG	1R	46.25
3355716|F|0--13:T>C	SNP	TGCAGTCTGGCCGTGTAGTTCGTATTAGAGCGCAAGTGGGCATGAGCCGAGATCGGAAGAGCGGTTCAG	1R	46.25
3899424|F|0--14:T>C	SNP	TGCAGCTGTATGGGTGTAGGTTGTGGTGTCCTTTCCTCAAGTACCGTCGGAGGCGACGCGGCGCTTCCT	1R	46.25
5217307|F|0--35:T>C	SNP	TGCAGTTTAGTCATCTGTTGAATCTTGGATGAAACTGACGAACTGAATTTTCTGAATCTGACCAAACTG	1R	46.25
100005803|F|0--30:G>A	SNP	TGCAGAGCAGTTAAAATCTCTAAACAAGTTGAACCTTTATCAATTCCTCTTGCAAAAGGATGATTCCAC	1R	46.25
100072325|F|0--38:A>C	SNP	TGCAGCTGTATGGGTGTAGGTTGTGGTGTCCTTTCCTCAAGTACCGTCGGAGGCGACGCGGCGCTTCCT	1R	46.25
100005068|F|0	SilicoDArT	TGCAGTGCGAAAGCTGACCCCAAAATCAACAGCATACTGCTCCACAGTCCACACAAGTGAAGTGCGGGC	1R	47.37
100005597|F|0	SilicoDArT	TGCAGCTCCAGCAGGGCAGCTGCTAAGCTGTATTACCGAGATCGGAAGAGCGGTTCAGCAGGAATGCCG	1R	47.37
100013444|F|0	SilicoDArT	TGCAGAGTTTACCTGTGTCAGTCCCATCAGTTGTGGCGATGATCACTTGCTTAATGATGCTCTTATCAA	1R	47.37
100014094|F|0	SilicoDArT	TGCAGGTTACACATTTCTGTGTCGATTTAGACTTACATGCATCACAAGGAAAATCTTCAATGTCGAGTA	1R	47.37
100014504|F|0	SilicoDArT	TGCAGTTTGAGGTTGAGAACAGAGAACCATACCAGCACAGAATGGAATCAACACCAACAGAGAAAATAA	1R	47.37
100015986|F|0	SilicoDArT	TGCAGTTGGTGTTCCGTGTCAATCTGATGGACAAAACCCAAGAACAGAGGGTCAACGAGATGTATCAAG	1R	47.37
100016262|F|0	SilicoDArT	TGCAGAACATACCCCAAGACCGACAAGCCAATAACTTCTAGTACCTCCGAAGAGGACCACTATCCTCTT	1R	47.37
100017103|F|0	SilicoDArT	TGCAGCCGCAAGCTGCACGTATATAAAGTAGTACGGTATAGTGGGCTTGGCACGTGCATGCATTTATGT	1R	47.37
100026472|F|0	SilicoDArT	TGCAGCCATGTCTGGCAAGAAAATGGGTTCCTAGCCATTGCAGAGCCTCCGAGATCGGAAGAGCGGTTC	1R	47.37
100026913|F|0	SilicoDArT	TGCAGCTGCACACTTTCCACATGAAAATGCGGCTGTCACACTTGAGATGCCGAGATCGGAAGAGCGGTT	1R	47.37
100038950|F|0	SilicoDArT	TGCAGCGAAGGAGCAAGGGAGGAACCAGTTAGAGCCGAGATCGGAAGAGCGGTTCAGCAGGAATGCCGA	1R	47.37
100039081|F|0	SilicoDArT	TGCAGTTACCAATGGAAATGCAACTGAGTGAAAAAGTACAAGTTACAACCGAGATCGGAAGAGCGGTTC	1R	47.37
100051626|F|0	SilicoDArT	TGCAGGCATGCCGGAAGAGGCCCTGGGCAGAGGAACGACGCGCACACGTCGATTAGGATGCGTCTTCCT	1R	47.37
100061202|F|0	SilicoDArT	TGCAGCTCGCCGCCGTCCTGATCCCTTGGATCTCCGCATGCCTCGGCCGTCCCCGAGATCGGAAGAGCG	1R	47.37
100067325|F|0	SilicoDArT	TGCAGGGAGAGGAAGAGTAAAGTAAACGAGAGCTCAAGCGGCAGAGCAGACCGAGATCGGAAGAGCGGT	1R	47.37
100069263|F|0	SilicoDArT	TGCAGTGGGCATGTCGACGACGGTGGTGCGGAGCGAGCCGAGATCGGAAGAGCGGTTCAGCAGGAATGC	1R	47.37
IA-294	STS		1R	47.93
rPt-398729	DArT		1R	48.49
rPt-399883	DArT		1R	49.62
100000113|F|0	SilicoDArT	TGCAGCTACCCAGTGCACCTACCTACTGATCAGTTTGCCGAGATCGGAAGAGCGGTTCAGCAGGAATGC	1R	50.76
100000830|F|0	SilicoDArT	TGCAGTAGTTTGGTATGGTCAATAGTTAATACTATGTTCCTAGGATCCAATCTGGTCCGAGATCGGAAG	1R	50.76
100012706|F|0	SilicoDArT	TGCAGGACGGTCAAGGCTAGCAGGAGCACGGCCGCAAGCACCGACATGGTCACCCAGGGATTGCTGAAG	1R	50.76
100017998|F|0	SilicoDArT	TGCAGGGAAGGTCAAGAGCATTACGTTGCATCCACTAGTGTACAACTTCATCACCAAGATGGCCAGGAA	1R	50.76
100020914|F|0	SilicoDArT	TGCAGTCGAGCAAAGCAAGCCCATTGATTTCTTGGCCATGCATATGAGAATCCTTATTTAACGCACAGG	1R	50.76
100021799|F|0	SilicoDArT	TGCAGTACCAAAGTCGCAAGGACAGAGAAGCCATAGGTCGGCAAGTACCTCGAAACAATGCTCGGCCTG	1R	50.76
100022099|F|0	SilicoDArT	TGCAGCCTGAGGGTGAGGTTGTGCGGGACCAACGACCTCCGCGCCGCAAAGCACATAATTAGCAGCTCA	1R	50.76
100023415|F|0	SilicoDArT	TGCAGGCGCACCATGCAGACCTGGGTCCCACGCAAGTATTTATCCCCAGTGCTACTCGTCCACAGAAAT	1R	50.76
100025622|F|0	SilicoDArT	TGCAGATCTCAACTTGGTTGTCAAAAAATGTAAGTAGAACGAGATGAGATGCAATATTGGCTGAACTCT	1R	50.76
100031003|F|0	SilicoDArT	TGCAGGATGAGTTCTTGCAAACCATGTCATAGAGTGTACATGGAGATCTCTAGGTTAATCAGATGCAAC	1R	50.76
100037280|F|0	SilicoDArT	TGCAGAGACATTGAAGCATGAAGATCGGTGTGTGTGGGAGTGAGTCACTGACCTGAGCTCCTTGGGAGG	1R	50.76
100039501|F|0	SilicoDArT	TGCAGCCATACCAGGTCAACCGAGACAAGGGACTAAATTTGTCCGAGATCGGAAGAGCGGTTCAGCAGG	1R	50.76
100042492|F|0	SilicoDArT	TGCAGACATTCTTTGCTGTCTATGCCTACTTCAAGCCTCCCAAGTAAGCGTGTGGCCACTCACCTTGCT	1R	50.76
100042978|F|0	SilicoDArT	TGCAGCTGGAGTGGATGAGTGGTATAGAAAAGATGGATGTAGACTTGCTAGCTCATTTTTGTGTCCACC	1R	50.76
100049525|F|0	SilicoDArT	TGCAGAAGACGTAAGGGGTGGACAGATAGTCCCAAACCTTGCCCACGACGCACTTGGCAGTGGTCAGCA	1R	50.76
100051048|F|0	SilicoDArT	TGCAGGTCGGCGCCACGTGCAGCACCACCTCCGTCCACAGGTCGCCCAGCAGCTTCCACACTCTCTCGC	1R	50.76
100057673|F|0	SilicoDArT	TGCAGCATATTTATCCAAGAGTGTGGCAGTTACTGAAGCAGCAACTGAAACCGAGATCGGAAGAGCGGT	1R	50.76
100077647|F|0	SilicoDArT	TGCAGGTGCAGCTACTAGCTAGCCCGACTTCCCTGCACAGCTCACCGAGATCGGAAGAGCGGTTCAGCA	1R	50.76
rPt-402362	DArT		1R	50.76
rPt-505890	DArT	tgcagtattgcatgaaaagtaattttagaagattctaggaggaactcatcttgtggtactagcaatgagtaagattccatcactatagtaacatgcattcagtggatcctaggctcattgagctctaaaattttaaaacctgaaaccatatatacaagtttcaaatagattaacaaaacattatatttacatgtagatgtacatgtctatgcagaatgccatttagaaatgccttattcttttgggcttgatctataatagaaacacggtaggtatttatattatccatcataatatttttctttctttggtggcccacaataaacaactattagttcagttttattggtgcatagttcgtgtatatagtacttagatgttatttatttttcagacatt…	1R	50.76
100002660|F|0	SilicoDArT	TGCAGTTGGTTGTTTTTCAAGGCAAGCAACTAGCATCTTCTGTCTCTTGTATAGCTGTAGCTACATACT	1R	51.32
100003145|F|0	SilicoDArT	TGCAGTGTCGTGGTATAAATATGAAACTTACATCGGTGAGAACCGAGATCGGAAGAGCGGTTCAGCAGG	1R	51.32
100013961|F|0	SilicoDArT	TGCAGCCACCTCCTTCGTCCAGTCTCGCCCTCGGGGATTAAATAACTACTCTAATTTAGGAATGCAAAT	1R	51.32
100014381|F|0	SilicoDArT	TGCAGCGTGTGGTTCTACTTCTTCTTGCAGAAGCAGTCCTTGATGGCATAGAACCAGCTTGGACTAGTT	1R	51.32
100018320|F|0	SilicoDArT	TGCAGCTCCTATTACTCAAAATCAGTAATACCAACCCATGTCATGGAATGTGTGTCATGACTCATGTCT	1R	51.32
100019932|F|0--62:T>C	SNP	TGCAGCTTGAAAGCAATAAATTTTGAACTGGCAATCAGTTGGTTTGTTAGAAAAAATCCAAATGATAGT	1R	51.32
100020612|F|0	SilicoDArT	TGCAGGAACTTCATTCCTTTGGTCATGTAAGCTGAACGGGCCCTTAGTATTTTATATATGTCCTCCCAC	1R	51.32
100020612|F|0--32:T>C	SNP	TGCAGGAACTTCATTCCTTTGGTCATGTAAGCTGAACGGGCCCTTAGTATTTTATATATGTCCTCCCAC	1R	51.32
100024944|F|0	SilicoDArT	TGCAGTTCCAAATAGCTCATAGTAAAGCGCATACTCCTACTCGGATATGGTACAATTGCTGCTCACAGG	1R	51.32
100027242|F|0	SilicoDArT	TGCAGGAGGCCCCTCGCCACCTCGAGGGAGATCACCCCGAGATCGGAAGAGCGGTTCAGCAGGAATGCC	1R	51.32
100051008|F|0	SilicoDArT	TGCAGATTCCTCCTCCTCCACTGAGCGTGGCCAGGCGTCAGCTTCACCGTCCGAGATCGGAAGAGCGGT	1R	51.32
100065813|F|0	SilicoDArT	TGCAGCATGCACGTGTACCAGAGGACAGATCCTGCCGCCGCCGAGATCGGAAGAGCGGTTCAGCAGGAA	1R	51.32
100079450|F|0	SilicoDArT	TGCAGAGGGAAGACTCGGCGCTCGGCACTCCACCAAGGTTCGCGTAATTCGGAGGCCGAGATCGGAAGA	1R	51.32
100082926|F|0	SilicoDArT	TGCAGGCCGCAGCTCCTGCCTTCCGTCTGGTGCCGCCCGCCGAAGATGCCACATCAGCCAGAGCCGAGA	1R	51.32
100089740|F|0	SilicoDArT	TGCAGTGCAGGCTTGGCCCTCTGCTATGCTACACCTTGGTTGCCCCCCGAGATCGGAAGAGCGGTTCAG	1R	51.32
100118728|F|0	SilicoDArT	TGCAGGGGACTGTGACAATGCCGGCAAAGCAAGCGAGGACGGCTGCGCTGCAAACACCGCCCCCGAGAT	1R	51.32
100018621|F|0	SilicoDArT	TGCAGGCTGCATGCATGCCTCCTCCTGATGTCTTCGCCCACATCGTACTGCCATCCCTCGAAAACTGGC	1R	51.88
100027613|F|0	SilicoDArT	TGCAGCCTGCCCGTGGGTTAGCAAGAAAACAATATTGCATCTGCTCAACCCCGAGATCGGAAGAGCGGT	1R	51.88
100037364|F|0	SilicoDArT	TGCAGCCGCAAGAGGTGAGAATTCAGTTACCCCGCAGTTCCTTCCCTTCATTCTTGTTCCGCCTTCGTC	1R	51.88
c10209_277	SNPe		1R	53.01
rPt-505748	DArT		1R	53.01
100078659|F|0--44:T>C	SNP	TGCAGGCGGAGGTCGGACAGCAGCTCCTCCTTGGCCCAGGTCAGTGGTCCGAGATCGGAAGAGCGGTTC	1R	54.2
100080242|F|0--45:C>T	SNP	TGCAGGTCACGGCGTGATGGGCCGATATCCCATGGTGGTATATAGCAGCAAGCCCGAGATCGGAAGAGC	1R	54.2
rPt-400458	DArT	tgcagacagttgttgggacaaaatctacctagcttaggtttggaaggcttgaaggatctggagaatcaactgggaacaagcatacgtaacattaggcaaacgaaggtaatgcttagtgctcacaactgcattgtagagatcatggaaaatatgcatgtagacatcatgcattagcagtgccactaaccgcactgttcttttcaggaccaacttatgattgatgaaattgaagagttaaacaagaaggtatgctttttcCcttacaacactactaccacgatattacaaggtggtgcgttttttctctacagagcttaatgTttttgaactgca	1R	54.2
100080242|F|0	SilicoDArT	TGCAGGTCACGGCGTGATGGGCCGATATCCCATGGTGGTATATAGCAGCAAGCCCGAGATCGGAAGAGC	1R	54.2
100036215|F|0	SilicoDArT	TGCAGATATAACCTAGTTTATGCCTGCGACAGGATCTCTGAACAGTCGTACTAGTATATCTTATCTTGT	1R	56.56
5207774|F|0--59:C>T	SNP	TGCAGATATAACCTAGTTTATGCCTGCGACAGGATCTCTGAACAGTCGTACTAGTATATCTTATCTTGT	1R	56.56
100000749|F|0	SilicoDArT	TGCAGCATTAGCTACTATTGATCTTTGTCCTCCTCTTCCTGCCGAGATCGGAAGAGCGGTTCAGCAGGA	1R	58.91
100000749|F|0--14:C>G	SNP	TGCAGCATTAGCTACTATTGATCTTTGTCCTCCTCTTCCTGCCGAGATCGGAAGAGCGGTTCAGCAGGA	1R	58.91
100007510|F|0	SilicoDArT	TGCAGCTATCTTGATCAGTATGCATCACCACATTTTTATTTGAACAAGCTTTTCACCGAGATCGGAAGA	1R	58.91
100014900|F|0	SilicoDArT	TGCAGGTGCAATGGCGAAAAAATCGATGGGACAACCTATAGTCCGAGATCGGAAGAGCGGTTCAGCAGG	1R	58.91
100019022|F|0	SilicoDArT	TGCAGATTCTTGTTTTCACTGATGTTTCTTCTTCTTCCTCTTTGCTCCAGGGTATCAACGTCCCCGTCC	1R	58.91
100021461|F|0	SilicoDArT	TGCAGCACATATATTCGTGTTTAAAACATGTGTGTCTGTGTACTGGCATCCTAGTCCGCACTGGCACCT	1R	58.91
100023752|F|0	SilicoDArT	TGCAGATCAAGATTAAAGTAAAATAGAAAGTAAGAGACTACATCATGAAGCTTACGAGGTTGCTCAAGT	1R	58.91
100023795|F|0	SilicoDArT	TGCAGCCTTCAGCCTCCCGCAACAAGATCCAGGTAACTGCAAGGTCTTTTTTCCGAGAGATGTATGTCA	1R	58.91
100071269|F|0	SilicoDArT	TGCAGTATGCCCCCGCCAACCGCGCTGGTGAAGCCATCGCCCGAGATCGGAAGAGCGGTTCAGCAGGAA	1R	58.91
100117856|F|0	SilicoDArT	TGCAGGTTGATCTATCTGTCACTTTGCTGCACCGAGATCGAAAGAGCGGTTCAGCAGGAATGCCGAGAC	1R	58.91
100128855|F|0	SilicoDArT	TGCAGGTCACGGCGTGATGGGCCGATATCCCATGGTGGTATATAGTAGCAAGTCCGAGATCGGAAGAGC	1R	58.91
3346983|F|0--41:A>T	SNP	TGCAGCCTTCAGCCTCCCGCAACAAGATCCAGGTAACTGCAAGGTCTTTTTTCCGAGAGATGTATGTCA	1R	58.91
100014900|F|0--26:T>C	SNP	TGCAGGTGCAATGGCGAAAAAATCGATGGGACAACCTATAGTCCGAGATCGGAAGAGCGGTTCAGCAGG	1R	58.91
100065805|F|0	SilicoDArT	TGCAGCCCGACCGTTTCCTCAATTACTCCCCGAGATCACTCTGTTGTTGCCGCTCTCTCTCTCTCGCGC	1R	60.05
100014102|F|0	SilicoDArT	TGCAGGTCGCCGCCGACTTGTTTGCATTGGACTTGGAGCTACGTCTCACAGCTGAGGGGCATGTCTATG	1R	61.77
100026381|F|0	SilicoDArT	TGCAGCCGCAGAAGTTTCTCTACTTCACGTGCCATCTCTGATGGAGCCCGAGATCGGAAGAGCGGTTCA	1R	61.77
100009509|F|0--35:G>T	SNP	TGCAGCGCCTTGCGCATCGCCATGTTCTCCATCTCGGTCACCTCGAACACATCCTTCAGCTCTGGCAGC	1R	62.91
100016385|F|0	SilicoDArT	TGCAGTCCTACTTAAAAACCTGCCACCTCCATCACTTATCCATTATCTGCCTCCCCTGTACCGCTGGGC	1R	62.91
100082296|F|0--26:C>A	SNP	TGCAGCTCCAGGAGCTCCGCGTCCATCGCTCCCCCCGCGCCTTCGCTGCCGAGATCGGAAGAGCGGTTC	1R	62.91
c20986_542	SNPe		1R	62.91
tcos227-1R	STS		1R	62.91
100002440|F|0--18:C>G	SNP	TGCAGATAAACATTTTCACCTAACAAGACACCCAACATTGCAGAAAGAGCAAGTTATATACAACCACCG	1R	65.89
100002440|F|0--28:C>G	SNP	TGCAGATAAACATTTTCACCTAACAAGACACCCAACATTGCAGAAAGAGCAAGTTATATACAACCACCG	1R	65.89
100004058|F|0	SilicoDArT	TGCAGATAAACATTTTCGGCAAACAAGACACCCAACATTGCAGAAAGAGCAACTTATTATATACAACCA	1R	65.89
100006841|F|0	SilicoDArT	TGCAGGGCCATGTGAGGAAGGAAGACAACCACACTACCTAGACGGTCAGTTCCGAGATCGGAAGAGCGG	1R	65.89
100008339|F|0	SilicoDArT	TGCAGGCCCAGGTGAGTAAGGAAGACAACCACGCTACCTAGCCGAGATCGGAAGAGCGGTTCAGCAGGA	1R	65.89
100011680|F|0	SilicoDArT	TGCAGGGCCATGTGAGAAAGGAAGACAACCACGCTACCTAGCCGAGATCGGAAGAGCGGTTCAGCAGGA	1R	65.89
100011764|F|0	SilicoDArT	TGCAGGCGAAGCTCTCACCGTCGCCAGTTCGTCGTGGCCTTTGTTAGGTCCATGTCGATCCTCTCATGC	1R	65.89
100013306|F|0	SilicoDArT	TGCAGGTGATGCAGAACAACATGGGTTCACAACCTGTGTCCACAAGCTCGGTCCGAGATCGGAAGAGCG	1R	65.89
100019704|F|0	SilicoDArT	TGCAGTACGATCTGAAAATTGATTAGGATCTGGCCCAGGAAATAGGTTAGCTAGCTGGGGCAGTGGGGG	1R	65.89
100025745|F|0	SilicoDArT	TGCAGATTTTACGATTGCAGGACATCTCGATTTCGAAGCTTGCCTGATGCATCTTTTTTGAACATTTAT	1R	65.89
100029145|F|0	SilicoDArT	TGCAGTACGATCTGAAAATTGCTTAGGATCTGGCCCAGCAACTAGGTTAGCTAGCTGGGGCAGTTGGGG	1R	65.89
100047860|F|0	SilicoDArT	TGCAGACTAGGTCGACTCGTGTTGATCCAGCCAGCTTGCATTGCACATGCGCTCGACCGAGATCGGAAG	1R	65.89
100087843|F|0	SilicoDArT	TGCAGCCAGCCTGGCCGCTGCACCATCCCGTTGGCCAACAAGTGACGTCGCAGCCGAGATCGGAAGAGC	1R	66.45
100004155|F|0	SilicoDArT	TGCAGAATTATGTGAATGACAAGGTTTATCTGGAGGAGCCGAGATCGGAAGAGCGGTTCAGCAGGAATG	1R	67
100004155|F|0--29:C>A	SNP	TGCAGAATTATGTGAATGACAAGGTTTATCTGGAGGAGCCGAGATCGGAAGAGCGGTTCAGCAGGAATG	1R	67
100006716|F|0	SilicoDArT	TGCAGATTGATGTCAATTGATTAAGACTATTTGGTTAGATATTTCCAAGAGCGAAGGATCAGAATGTAG	1R	67
100007261|F|0	SilicoDArT	TGCAGTGTGTTGCTTGCATCCCCTGGGACCAAAATGCTGTGAAGTTTTGAGGACAGTCTTCCGAGATCG	1R	67
100007261|F|0--49:A>T	SNP	TGCAGTGTGTTGCTTGCATCCCCTGGGACCAAAATGCTGTGAAGTTTTGAGGACAGTCTTCCGAGATCG	1R	67
100007721|F|0	SilicoDArT	TGCAGTCACCGTCGCAGGCGCTGGCACCTTGTAATTTAACGCCACAGCAGCAGACTTACGCTTCTTGAA	1R	67
100008283|F|0	SilicoDArT	TGCAGTGCGAGCGCCATATCTGCTAGCTAGAGAAGAGCGAGAGAACCCTAACCCTAGATCCACTCTCGC	1R	67
100008542|F|0	SilicoDArT	TGCAGCAAGGACATGCTCACCCTTTTCTGATATGGAATACTCAACAAGTGGGTCTGCCCGAGATCGGAA	1R	67
100008756|F|0	SilicoDArT	TGCAGAACGGTGACATGTTGGATGTCATGTGGAGATTACAGACGGATGGATGAATTGAAACGGATAATG	1R	67
100009610|F|0	SilicoDArT	TGCAGTGCGTTCTTTGGTCTTGGCGACTTGTATGCATAAAGAACTCCTGTCGGTCTCTTCTTTTGCAGC	1R	67
100014924|F|0	SilicoDArT	TGCAGCAAAGTGTGGCCTGCCCAATAAAAGTATGGTTAAGAAATGACCCGAGATCGGAAGAGCGGTTCA	1R	67
100016589|F|0	SilicoDArT	TGCAGTATCGTCTCTCTTCTCCCCACCAAGGAAGGTGCCCGCACACAGGTCATCTCTCGCCGAGATCGG	1R	67
100016854|F|0	SilicoDArT	TGCAGTTGTATATTCGAAAGAGACCTTCTGTTGCTATATTATTTGACGGGGCCAGAACCAGACAAGAAA	1R	67
100016854|F|0--40:A>C	SNP	TGCAGTTGTATATTCGAAAGAGACCTTCTGTTGCTATATTATTTGACGGGGCCAGAACCAGACAAGAAA	1R	67
100019854|F|0	SilicoDArT	TGCAGTGCGAGCGCCATATCTGCTCTGCTCGAGAAGAGCGAGGAAACCCTAACCCTAGATCCACTCTCG	1R	67
100020693|F|0	SilicoDArT	TGCAGTGCCAGCTCAAGCGCACCTGTGGTGGTCTTCGTGTCCAAGATGTTTGTGGTGAAACACAAGGAT	1R	67
100031735|F|0	SilicoDArT	TGCAGGCCACGACGCACCTCCTCACCTTCTCCGCCTCGGCGACGATGCCGGCATGCTCCGCTGAAACCC	1R	67
100031981|F|0	SilicoDArT	TGCAGTAATTTATCCCACATAACATCAACGCGTCGCTGCATTTATACCACCTGAGGGGCGACATCTTTT	1R	67
100031981|F|0--32:T>C	SNP	TGCAGTAATTTATCCCACATAACATCAACGCGTCGCTGCATTTATACCACCTGAGGGGCGACATCTTTT	1R	67
100033395|F|0	SilicoDArT	TGCAGCGCTTATCCAACCCATGCGTTACACGGACGAGAAGCCTCCGAGATCGGAAGAGCGGTTCAGCAG	1R	67
100033395|F|0--23:G>T	SNP	TGCAGCGCTTATCCAACCCATGCGTTACACGGACGAGAAGCCTCCGAGATCGGAAGAGCGGTTCAGCAG	1R	67
100035840|F|0	SilicoDArT	TGCAGGGCAGGCGACGGGGCCAATAAATGCCGAGGAGGCAGCGCCTTTGGCGGCGAATGCAGGGGGGCC	1R	67
100093512|F|0	SilicoDArT	TGCAGCAACGCCGTGCTGCCTCGTGGCCGTGACCAGGGTGATGCTGCCCTAGTTGTGTCCAACATTTCA	1R	67
100114873|F|0	SilicoDArT	TGCAGAGTTCGTATGGGGTACACATCTTCCGAGATCGGAAAAGCGGTTCAGCAGGAATGCCGAGACCGA	1R	67
100121215|F|0	SilicoDArT	TGCAGCTCCCGCTCCGCCTCGTCGTCGACCTCGACGGCGATGTGGCCGAGATCGGAAGAGCGGTTCAGC	1R	67
rPt-509379	DArT		1R	68.73
100016776|F|0	SilicoDArT	TGCAGAGCCAGACGAGAACTTGTGCCAAGGTGAGCAACATGGCCAAGAAGACAGCAGAACAGAGCAGGC	1R	70.45
100029855|F|0	SilicoDArT	TGCAGAGTTCTCCATGAAAGACCTCGGAGCACTCCATAACTTCCTGGGCATCGCGGTGACCAGGGACGA	1R	70.45
100029855|F|0--37:A>T	SNP	TGCAGAGTTCTCCATGAAAGACCTCGGAGCACTCCATAACTTCCTGGGCATCGCGGTGACCAGGGACGA	1R	70.45
100044804|F|0	SilicoDArT	TGCAGCCTCCTCACCACGGCGCAGCCCTTCTTCTTCCTCCGACGCTTCCTCCTCCCGTTGCTGCCGCCG	1R	70.45
100048973|F|0	SilicoDArT	TGCAGCCTCCTCACCACGGCGCACCCCTTCTTCTTCCTCGGACGCTTCCTCCTCCCGTTGCTGCCGCCG	1R	70.45
100129249|F|0	SilicoDArT	TGCAGGGGGAGGGGAGGCGATCTCGGCGGCGCGAGGCTCAATCGCGTGCTTCCTACAAGGCTCCAGCGG	1R	70.45
5036362|F|0--23:C>G	SNP	TGCAGCCTCCTCACCACGGCGCACCCCTTCTTCTTCCTCGGACGCTTCCTCCTCCCGTTGCTGCCGCCG	1R	70.45
100005634|F|0	SilicoDArT	TGCAGCTGCTGCCTGAACTCTGAATGTCGTGGCTGATAAATGAAGTGCCTGCAAACATACAGTTTCTGA	1R	71.57
rPt-507474	DArT		1R	74.48
HAS175-1R	STS		1R	75.05
100019481|F|0	SilicoDArT	TGCAGACAAAGGGATCCCAATACGTGAAGTTATGAAGTCACTCTCAGAGTTCCAAACTTTCAAAAGAAT	1R	75.62
100027022|F|0	SilicoDArT	TGCAGACCTGAACTTGGCAGATGTCCTGGTGGATGAGTACATGTACCTAGCGATGAAGCGGCCGAGATC	1R	75.62
100033551|F|0	SilicoDArT	TGCAGTATCATCTTATCACAGACTAGTCCATGCAGGACGTAGGATGGCTGTGTGCCTGCGTTGATCTCT	1R	76.75
100033551|F|0--54:C>T	SNP	TGCAGTATCATCTTATCACAGACTAGTCCATGCAGGACGTAGGATGGCTGTGTGCCTGCGTTGATCTCT	1R	76.75
100056982|F|0	SilicoDArT	TGCAGTACTCATCTTATCACAGACTAGTCCATGCAGGACGTAGGATGGCTGTGTGTCTGCGTTGATCTC	1R	76.75
100072550|F|0	SilicoDArT	TGCAGTCGCCGTCGCTCGACAGATCTGGCTTCGTCTCTGGCGATGCGAATCCCCAGCTTGGCTGCTCTG	1R	76.75
100077327|F|0	SilicoDArT	TGCAGCTAGCTATAGGTTGGAGGTGGCTAGGCGACGTCGCGCTGCTCCTCCTTGATCGCACCGAGATCG	1R	77.31
100142973|F|0	SilicoDArT	TGCAGCTAGCTATAGGTTGGAGGTGGCTAGGCGACGTCGCGCTGCTCCCCCTTGATCGCGCCGAGATCG	1R	77.31
100005669|F|0	SilicoDArT	TGCAGGACTCCATCCACTATGTCGCCATCGTATTCCCTTGCTTCAACTTCTTCCCGAGATCGGAAGAGC	1R	79.03
100009524|F|0	SilicoDArT	TGCAGATGCTTACATACATCTATCCATATCAATGCACAAACGCACACCCTACGTCCCTACCCTTATGAA	1R	79.03
100010059|F|0	SilicoDArT	TGCAGGAAATAGGAGCTCTTCGAGGGCCCAATTTGTGCACTCACGATTCAACCTGGGCCACCACGATGC	1R	79.03
100013364|F|0	SilicoDArT	TGCAGCAGATGAGCCTTTGGTAGTACAAAGGAAAGCGCACACACCGTTACAGGGGAGAAAGTTCTACCT	1R	79.03
100014712|F|0	SilicoDArT	TGCAGCAGATGAGCCTTTGGTAGTACAAAGGAAAGCGCACACACCATTACAATGAGCCTTTTCCCTTGC	1R	79.03
100015227|F|0	SilicoDArT	TGCAGAACAAATTGCATAAAGCAAATGTACCTTAGAACAATTGCCGCAAACCGAGATCGGAAGAGCGGT	1R	79.03
100016988|F|0	SilicoDArT	TGCAGCAGGAAATAGGAGCTCTTCGAGGGCCCAATTTGTGCACTCACGATTCAACCTGGGCCACCGCGA	1R	79.03
100018886|F|0	SilicoDArT	TGCAGTTCAGATGTTCTCTTTCGTCCGTACACAGATGTGCTAGCGAGATATCATGCTCGATTATTGATC	1R	79.03
100018886|F|0--44:G>T	SNP	TGCAGTTCAGATGTTCTCTTTCGTCCGTACACAGATGTGCTAGCGAGATATCATGCTCGATTATTGATC	1R	79.03
100022162|F|0	SilicoDArT	TGCAGATGTCACTACTACCGTGGGTCCTGCTGCTGTGACCTCCTTACCTGCTCCTGCCGCTACAGTGGA	1R	79.03
100023983|F|0	SilicoDArT	TGCAGGCACCGCACCGCCAGGTATTCGCGCATTTGGTACTGCCACCTCCCCTCCTCCTTATCTTCCCCA	1R	79.03
100031319|F|0	SilicoDArT	TGCAGCAGGTGGCAAGTGGTGGAGCCTTTGCTAAAGGCAGAGCAAATGGGCCGAGATCGGAAGAGCGGT	1R	79.03
100031797|F|0	SilicoDArT	TGCAGCAATGATAACCTTTTTTCTTTTTTCAGAATGCATGCGCAGCTGAAGCAGATGGAGAGATCATCA	1R	79.03
100054342|F|0	SilicoDArT	TGCAGAAGTGGAAGAAGTTGGGCGCCACTGGCCTTGCGGCTCTTGCGCACATCCGAGATCGGAAGAGCG	1R	79.03
100094862|F|0	SilicoDArT	TGCAGGTGGCGCCCCTCACAGTCCACACCTACGGCATCCTCATGGACTGCTGCTGCCGCGCGTCTCGCC	1R	79.03
100136641|F|0	SilicoDArT	TGCAGAGGGACCCCGACCTCACCGAGATCGGAAGAGCAGTTCAGCAGGAATGCCGAGACCGATCTCGTA	1R	79.03
c11105_1553	SNPe		1R	79.03
rPt-508039	DArT		1R	79.03
3353084|F|0--16:A>G	SNP	TGCAGATGTCACTACTACCGTGGGTCCTGCTGCTGTGACCTCCTTACCTGCTCCTGCCGCTACAGTGGA	1R	79.03
100005325|F|0	SilicoDArT	TGCAGCTCCTGTCCGCTCCGCGTCGTACCCTACGCATGCCATTCGTATATGTGGGCCGAGATCGGAAGA	1R	79.59
100016260|F|0--24:G>T	SNP	TGCAGATCCCCTGGGTCTCCACCCGCACCACGCCCTTCCTGAAGGTGAAGAGCTCCGAGATCGGAAGAG	1R	79.59
100016260|F|0--7:C>G	SNP	TGCAGATCCCCTGGGTCTCCACCCGCACCACGCCCTTCCTGAAGGTGAAGAGCTCCGAGATCGGAAGAG	1R	79.59
100054902|F|0	SilicoDArT	TGCAGGGAGGAAAGCCGCAGGTTGCCGACTTTGTTCACGGATCCGATGGCCTCGGGAACGTATCAGTTC	1R	79.59
100069464|F|0	SilicoDArT	TGCAGATCGAATCCAGCACCGCCGCCGTCGCCAGGAAGCTCGCCTCCGCACCCGAGATCGGAAGAGCGG	1R	79.59
100086916|F|0	SilicoDArT	TGCAGAGCGGCAGCGCTGATGAAACCGATTTCCTCCCGATTTGTTGCCATTTCGCCAAACAAGTTTGCG	1R	79.59
100003221|F|0	SilicoDArT	TGCAGCAAGTAAAAATGTGCATTGATATTGGCCTACACTGCGTCCAGTCAAAGCCTGAAAAGAGACCTA	1R	80.15
100012198|F|0	SilicoDArT	TGCAGAAGTATTGATAATGTCATGAAGTTGATCTGCTTGTCATCCCGAAAGGCTTACATGAGATAGATA	1R	80.15
100017463|F|0	SilicoDArT	TGCAGGTGACTATGGTGAACTTGACTGGAACCAGCGTTATCAAATTCTAAAAGGGATTTGTCAGGGTTT	1R	80.15
c36448_427	SNPe		1R	80.71
Xucr5	STS		1R	84.25
100012606|F|0	SilicoDArT	TGCAGATCAGTACCTATATATGATCCTGCATTGGCTTCTGTGTTGTTCTCTGCTACTCTACCCTTCTTT	1R	87.78
100012606|F|0--45:T>C	SNP	TGCAGATCAGTACCTATATATGATCCTGCATTGGCTTCTGTGTTGTTCTCTGCTACTCTACCCTTCTTT	1R	87.78
100023866|F|0	SilicoDArT	TGCAGATCCTTTAGCAGTAAAAAGATGGTGGTTGGCTCCCAATTAGCATGATTTGGTAGATGATTTGGA	1R	87.78
100087462|F|0	SilicoDArT	TGCAGGCCAGGTTAGGGTCGGGTTTGGGGCAGCAAATAAGCGTCAGGTGTTCGTCAGTAAACAACCATT	1R	87.78
100087462|F|0--63:A>G	SNP	TGCAGGCCAGGTTAGGGTCGGGTTTGGGGCAGCAAATAAGCGTCAGGTGTTCGTCAGTAAACAACCATT	1R	87.78
100100807|F|0	SilicoDArT	TGCAGCCCACAGGTCATCACGGCAGCAATAACAAGCGCCTGCCTAGCCCTAGCCGCGCGTCCTCGGCGG	1R	87.78
100007875|F|0	SilicoDArT	TGCAGTTTAATCACTTTAAGGGCAGTCAGTGTCGAAATCTTCCTACCATTGTGATCTGGCCGCCGCCGC	1R	88.36
100009083|F|0	SilicoDArT	TGCAGCCGTTGACGCAGCTCACGCAGCTCTGCCCTAACCTATCCGAGATCGGAAGAGCGGTTCAGCAGG	1R	88.36
100009083|F|0--6:C>T	SNP	TGCAGCCGTTGACGCAGCTCACGCAGCTCTGCCCTAACCTATCCGAGATCGGAAGAGCGGTTCAGCAGG	1R	88.36
100014340|F|0	SilicoDArT	TGCAGTTCCACCGCACAGCCGCAACTGTCCAGACCTCCAGTGCTCCACCGAGATCGGAAGAGCGGTTCA	1R	88.36
100014340|F|0--26:G>A	SNP	TGCAGTTCCACCGCACAGCCGCAACTGTCCAGACCTCCAGTGCTCCACCGAGATCGGAAGAGCGGTTCA	1R	88.36
100014783|F|0--49:T>C	SNP	TGCAGCCTGCGCTTTCTTCAGATCTTCCTCGAGCGATGCTACCCGAGCTTTAGACTCACTGAGTTCTAT	1R	88.36
100016043|F|0	SilicoDArT	TGCAGATCCAGGTTCATGCCCATGGCTACTTTCGTTCGCCGCATAGGAAAGCTTCCACCTTTCGCCGTG	1R	88.36
100016778|F|0	SilicoDArT	TGCAGTTGAGTCAGTGACATGTGGGCCTAACAGACATCTGGCCCACATGTTCTCGTCTCTGGGCTCCGT	1R	88.36
100031628|F|0	SilicoDArT	TGCAGTATGCGTGCGTGCGACACGGAGGAGCATGGGGACCGCTACTGGACCAGGAGATTGACATGAAAC	1R	88.36
100032894|F|0	SilicoDArT	TGCAGTACAAAATTACCCTACACACACCATGTGCAGAGAGCAGAGTGATCATGCATATGAGTCACCGAG	1R	88.36
100034259|F|0	SilicoDArT	TGCAGCATTATTAACTGGACTGGAAAAGGGATAGCAAGCAAATCGATAGCGCGTGCATATAAAATTTTC	1R	88.36
100042751|F|0	SilicoDArT	TGCAGCGTTGTCCATGTCACCCGAGATTGCCCGCACAACCGTCGGCCACAAGGGCGTCCGTCCAGTCAC	1R	88.36
100044291|F|0--19:C>T	SNP	TGCAGATGCAGAGCGACCTCGACGCTCTTGCCGGGAAGCTGGATCTCAACCTCCGAGATCGGAAGAGCG	1R	88.36
100060248|F|0	SilicoDArT	TGCAGCGCGCCTCTGGACGCCAGATCGTCTGACCACCGAGATCGGAAGAGCGGTTCAGCAGGAATGCCG	1R	88.36
100061942|F|0	SilicoDArT	TGCAGAGGTGGCGGGACGAAGCGCGTCGGCCGAAGACGTGCGAGGCACAACGCTGCGTAGCTGCTAGGC	1R	88.36
100061942|F|0--53:T>A	SNP	TGCAGAGGTGGCGGGACGAAGCGCGTCGGCCGAAGACGTGCGAGGCACAACGCTGCGTAGCTGCTAGGC	1R	88.36
100063051|F|0	SilicoDArT	TGCAGCCACAGTCACCTCCTCCATGTTTCCTCATCAGCTTGAAGGATTTACCGAGATCGGAAGAGCGGT	1R	88.36
100082981|F|0	SilicoDArT	TGCAGCTTGAGACCGCAAAGGCCACCATTGACTCACTCCTAGCTGAGGGTGCCCGAGATCGGAAGAGCG	1R	88.36
100134847|F|0	SilicoDArT	TGCAGCAGGGACATCTGCGTCGCCGTAGCCGAGATCAGAAGAGCGGTTCAGCAGGAATGCCGAGACCGA	1R	88.36
100172878|F|0--28:T>C	SNP	TGCAGATGCAGAGCGACCTCGACGCTCTTGCCGGGAAGCTGGATCTCAACCTCCGAGATCGGAAGAGCG	1R	88.36
100003767|F|0	SilicoDArT	TGCAGTTTAATTAACCTCAAGCATGTCACTCCTTTGGAATTTAATCATGGTCATCATTCATGAACCGAG	1R	88.92
100021678|F|0	SilicoDArT	TGCAGGGGCCAGCTCAACAATGATGAGCTCGACCGTGGCCGCCAATACGATGTGCTCAGCTGCCGCCAT	1R	88.92
100021678|F|0--8:C>G	SNP	TGCAGGGGCCAGCTCAACAATGATGAGCTCGACCGTGGCCGCCAATACGATGTGCTCAGCTGCCGCCAT	1R	88.92
100041821|F|0	SilicoDArT	TGCAGCGGTAGTAGTACGCGAGCTCACGGCATGGATGCATCGATTAATTCCACGGAACCCACCGACCAG	1R	88.92
100045693|F|0	SilicoDArT	TGCAGGTGACTGTAATAAATACTCCGTAACTGCTATCCTTGTCAATCTGTGACTACGGGGCGAAGAGAA	1R	88.92
100085470|F|0--42:T>G	SNP	TGCAGCTGCCACTGACGATGTGGAGTGGGAGGCCCTGGAGGCTCTGTGCCGCGAGACGGAGAAGAAAGG	1R	88.92
100139922|F|0--11:G>A	SNP	TGCAGGTGACTGTAATAAATACTCCGTAACTGCTATCCTTGTCAATCTGTGACTACGGGGCGAAGAGAA	1R	88.92
100001315|F|0	SilicoDArT	TGCAGTGCTATGGAACTTTGTTTGGGAATGGGTGGCTTTGTGAAAGCATTGGTTGCTCCGAGATCGGAA	1R	89.48
100005829|F|0--33:A>C	SNP	TGCAGTTATGATGGGTTCTTCATCTTGGTCTACACCCCCACCAGCCTTTGGATCAGTCATGGGCTCTTC	1R	89.48
100024248|F|0	SilicoDArT	TGCAGTTTGGAGAAAAGAAACGCACACCTTAATTTGTCACCGCCGAGATCGGAAGAGCGGTTCAGCAGG	1R	89.48
100027157|F|0	SilicoDArT	TGCAGCTGCTTCGGTTCCTTCGTGTTCTGCATGGTGACATCGACTGTCATTTGGAGTTGAATCGCCGAG	1R	89.48
100030301|F|0--42:C>T	SNP	TGCAGCGAAGCGAACCACCTACAGTAGCCTATCATTCTTTGCCTTTTCCGAGGAGCGAGATCACGAGAG	1R	89.48
100030301|F|0--53:A>C	SNP	TGCAGCGAAGCGAACCACCTACAGTAGCCTATCATTCTTTGCCTTTTCCGAGGAGCGAGATCACGAGAG	1R	89.48
100059236|F|0	SilicoDArT	TGCAGGATGGCTGCTTGCTGCCTGGAACGGCTGGCTGCTAGCTAATTGTGTGTAACATCCATTCAGTTC	1R	89.48
100059236|F|0--6:A>C	SNP	TGCAGGATGGCTGCTTGCTGCCTGGAACGGCTGGCTGCTAGCTAATTGTGTGTAACATCCATTCAGTTC	1R	89.48
100083507|F|0	SilicoDArT	TGCAGTAGTAGGTCCTCCGCGAGCGCCCCGAGCAGATAGGCCCTCGCCGAGATCGGAAGAGCGGTTCAG	1R	89.48
100133831|F|0	SilicoDArT	TGCAGCCGTGAGTCGCCGCCTCCACGGCCGCGGCAAGCGACCGAGATCGGAAGAGCGGTTCAGCAGGAA	1R	89.48
rPt-506796	DArT		1R	89.48
100012409|F|0	SilicoDArT	TGCAGCTGGAGGTGAGCAGAGCATCCTTGAAGCAGACATCGTTCTTGTCTCTGCTGGGAGAACTCCATA	1R	90.04
100032619|F|0	SilicoDArT	TGCAGATCTGCTTTGGACATGACTGATACCACTCTTTTACAGAGAGCAAAGCATCCAATGATAAACGTG	1R	90.04
100061344|F|0	SilicoDArT	TGCAGGATTGGGCGTTGGCTGTGAGCCAGCAACTTCCCTCTCGGCCCAACGTACGGCCCCGAGATCGGA	1R	90.04
c9696_667	SNPe		1R	90.04
c11008_986	SNPe		1R	91.75
rPt-389793	DArT		1R	91.75
tcos1946-1R	STS		1R	91.75
100005750|F|0	SilicoDArT	TGCAGGCCAAAACATCAAATTGCAAGCCCAGATTAGGTCATGAGTCGTGACCTATATCACCGAGATCGG	1R	92.3
100021558|F|0	SilicoDArT	TGCAGGCCAACAGATTAGGGCATGAGTCGGGACATATATCACCGAGATCGGAAGAGCGGTTCAGCAGGA	1R	92.3
100140555|F|0	SilicoDArT	TGCAGGGCGTATGTGATTTGTGGCGCCCGCCGAGATCAGAAGAGCGGTTCAGCAGGAATGCCGAGACCG	1R	92.3
100001404|F|0--41:G>C	SNP	TGCAGGTAGTCCAGCTTCGCCTTCTCCAGATCCGCCATCACGCGATCCGCCTTGTATATCCGAGATCGG	1R	92.86
100010583|F|0	SilicoDArT	TGCAGCTTGCTCCAGCTCCTTCTCCGACACGATGAGCGCAGGCACAAGCCTGACAACATTGCCTTTCCC	1R	92.86
100020277|F|0	SilicoDArT	TGCAGAAATGCAGTAAAAACTTTCATACACCATCAACAACAAACCATTCTCATGATGTCTTGGCAACTT	1R	92.86
100025523|F|0	SilicoDArT	TGCAGGAGCTACTACAAGTGCACAACGGTGGGTTGTCCGAGATCGGAAGAGCGGTTCAGCAGGAATGCC	1R	92.86
100029461|F|0	SilicoDArT	TGCAGAACTGTTGTCACAGCTTAATGAGTACTCCCTCCGTCCGAGATCGGAAGAGCGGTTCAGCAGGAA	1R	92.86
100041117|F|0	SilicoDArT	TGCAGCGCCGTCACGATACAAGTAAGAAACACACGGTCGAACAGGTGAACTAGTCTGATTACGAGTTCC	1R	92.86
100048988|F|0	SilicoDArT	TGCAGCAAGCACTACAGATAGATGAAATCTACAGACATCGCCGAAGCACCGAGATCGGAAGAGCGGTTC	1R	92.86
100069090|F|0	SilicoDArT	TGCAGGACGCGGGTCGCCACCGAGATTGTCGGAGTTGCCTTGCAGTAGCTTCCTCCTTGATCTCTGCTG	1R	92.86
100128513|F|0	SilicoDArT	TGCAGGTGCCCGTTAATGATCCGAGATCGGAAAAGCGGTTCAGCAGGAATGCCGAGACCGATCTCGTAT	1R	92.86
100143915|F|0	SilicoDArT	TGCAGCCTCCCCGAGCCGACGCCCAGCCCCGCCGACATCGCCGCCGTCAGCCGCTCGCACAGCGAGGCC	1R	92.86
c85838_162	SNPe		1R	92.86
c8958_520	SNPe		1R	92.86
rPt-508859	DArT	tgcagcaattttgttgtgatacaaggatgaagagaaactaaaactacaaggtttgcatgtagaaatattgcgctcttggatgcacgcaatgaaacctagtaaacgaaaaccacatcagagacgccattcttcccttctccaaaatcttgcgctcttggatgcatccaaaagcatcaacccctcttcagaatgtagcccctcagccaaacgtacaatagatttcgtttcctattcatcatcagaaaagttgtccaaagggacctcactcggtttagccacatcagaatcctgccagtaaacaaaacattagttaatcatacaggtacatgagtttgttgtactcacacaaataacgctatatccagaggatttttacctgtgctttatcccagtccttca…	1R	92.86
ORA17	STS		1R	93.98
100004961|F|0	SilicoDArT	TGCAGTTGTCAGATGCAAATACACTAGCTATACCAAATGATATACAGATGGTGGGAAACGTTATACCGA	1R	95.11
100009336|F|0	SilicoDArT	TGCAGCGCTGGCATGACAGCACCAACGACTAGCAACCACTCTTCGTTGCCATTAGTCTGACCAAAAAAA	1R	95.11
100010642|F|0	SilicoDArT	TGCAGGAAAAAGAAAAAACGGGAAAACCAGTGCCAGACCGAAACCTTCTGGAAGGTTCCAAATCTGGAC	1R	95.11
100059448|F|0	SilicoDArT	TGCAGATGGCAGCTTGTAAGTCGGGCGTCGCGACGTGGAGCTGGAGGCGAGAGAAACCCCGCGACAGCA	1R	95.11
100017336|F|0	SilicoDArT	TGCAGACCAATGGAATCCCGTCGCAAGGACCCAACGCAGAAACCAACAAAAATAACATGGGCAGTACAC	1R	95.66
100035952|F|0--21:T>A	SNP	TGCAGCGCTGCGGGGAAATTTTGTACGCGTCCTGCCGAGATCGGAAGAGCGGTTCAGCAGGAATGCCGA	1R	95.66
100046127|F|0	SilicoDArT	TGCAGCTCATCCTCCAAGGGAAGCTGCCCAACAACGGCCGCCACGCCGAGATGAGGAGCAACCTGGAGA	1R	95.66
100063092|F|0	SilicoDArT	TGCAGACGTTTCCGCGACATGATCTCTGTTGCAAAAAAAAAATGCAACATAATCTATGTTGCAAAAGTT	1R	95.66
c1544_1505	SNPe		1R	95.66
tcos214-1R	STS		1R	95.66
tcos220-1R	STS		1R	95.66
3884717|F|0--17:C>G	SNP	TGCAGACCAATGGAATCCCGTCGCAAGGACCCAACGCAGAAACCAACAAAAATAACATGGGCAGTACAC	1R	95.66
100001332|F|0	SilicoDArT	TGCAGTACATCGAGACAAAAAGAAAATCGATCTTCGCTATTGCGTCAATCCATCAAATCGCCGAGATCG	1R	96.22
100007845|F|0--47:T>G	SNP	TGCAGCCCTAGCAAGGTACATGTTTCTTTTCTTTCTAACCCTCCTTTTCTATCTGGTGCCAATCTGTCC	1R	96.22
100011065|F|0	SilicoDArT	TGCAGTATTAAGTACTACTGCTTGTACAGATGTTCTGCTATAAAGAAAAGAGAAAAGCAAAAGGGGCAT	1R	96.22
100016636|F|0	SilicoDArT	TGCAGATTTTGGGATAAGTACAATTATCGTATTATTCCAGCCTTCGGGAATATCACCACCCCTTAGTAC	1R	96.22
100020925|F|0	SilicoDArT	TGCAGTATTAAGTACTACTGCTGGTACAGATGTTCTGCTATATAGAAAAGAGAAAAGCAAAAGGGGCAT	1R	96.22
100026354|F|0	SilicoDArT	TGCAGAGTATGGGGAATACTTTCGAGCCTCATGTGCTCGGAGCCCGAGATCGGAAGAGCGGTTCAGCAG	1R	96.22
100075684|F|0	SilicoDArT	TGCAGCCAAGGGACGGCAACGCGGCGGCCTCCCTGTCCTTGGGCGGCGCCGCCCTTGCCAAATCGAAGG	1R	96.22
100075684|F|0--7:A>G	SNP	TGCAGCCAAGGGACGGCAACGCGGCGGCCTCCCTGTCCTTGGGCGGCGCCGCCCTTGCCAAATCGAAGG	1R	96.22
100079323|F|0	SilicoDArT	TGCAGCCCGAGGCTTTAGCCGCCTCGCACTCGAAGTAGAGGAGAGGAGCTCCCTGCCGCGAGCCTCTCC	1R	96.22
100082317|F|0--51:A>G	SNP	TGCAGCGTTTGTGCAGCCGACGCACTCTAAGTGCTCGATGAAATGCCCATTAGAGAGATAGGAGGAGGG	1R	96.22
100086694|F|0	SilicoDArT	TGCAGCCACGGCCGTGTATCACGGCCTGGCCGTTGGTCGATGTGCCACACTCCGCGTCAGCCTGCCCTG	1R	96.22
rPt-505283	DArT		1R	96.22
3897679|F|0--45:C>G	SNP	TGCAGCCACGGCCGTGTATCACGGCCTGGCCGTTGGTCGATGTGCCACACTCCGCGTCAGCCTGCCCTG	1R	96.22
5215614|F|0--22:G>T	SNP	TGCAGTATTAAGTACTACTGCTGGTACAGATGTTCTGCTATATAGAAAAGAGAAAAGCAAAAGGGGCAT	1R	96.22
100012977|F|0	SilicoDArT	TGCAGCCGGTTGACGAACATTTGCGGATATATCTACTTGGTACCCTGCAATATACAAGATGGAGAGAAA	1R	96.78
100014618|F|0	SilicoDArT	TGCAGGCATGCCTTCATCCTTATTGAAAATTAAACAGTCATCCTTCAGCTTGCGCAAATAGCATGTGTT	1R	96.78
100016055|F|0	SilicoDArT	TGCAGATCGAGCAGGCTCGACGAACGACAAATTCTACTGCCTTTGTTTGGATCAACATTTGCATGAAAA	1R	96.78
100018454|F|0	SilicoDArT	TGCAGAGATCAGAGTTTGAAGGACTAGTCAGGATTTGTTTGCTTTTAATTTGAGTCTGCATGCTCCTTT	1R	96.78
100018888|F|0	SilicoDArT	TGCAGTCTCCTCGCGCATTGGAGGTTCTCATCCATGGGAAGCCTGCACATCCTCCATGCCTAGTACGCT	1R	96.78
100021187|F|0	SilicoDArT	TGCAGTGCTGTGAACTCCCACGCAGGACGGATGCCAGATGCGTCCTGTTCAACTTCGGCGACTCAAACT	1R	96.78
100021740|F|0	SilicoDArT	TGCAGAAGATACACTTGCATTGTTCCCAGAGAAAATATTCTCTACCGAGATCGGAAGAGCGGTTCAGCA	1R	96.78
100026593|F|0	SilicoDArT	TGCAGAGGACAGCATGAGCAGGCGGTAAAAGACAAGGCGTACCGAGATCGGAAGAGCGGTTCAGCAGGA	1R	96.78
100031293|F|0	SilicoDArT	TGCAGTTCACATAAGATTATGGATAGATTGTTAATTATTCATGCCGTTGCAAGCGTGTACGTAACACCA	1R	96.78
100032084|F|0	SilicoDArT	TGCAGATCCTCGATGAGAGAAGCGATGGAAGGAACCGTGCCGAGATCGGAAGAGCGGTTCAGCAGGAAT	1R	96.78
100040543|F|0	SilicoDArT	TGCAGTATTTAAATTATTGTTTTTTTCTTTTGGCATACGGCCCCGAGATCGGAAGAGCGGTTCAGCAGG	1R	96.78
100044124|F|0	SilicoDArT	TGCAGCCCGTGTTTCGCGTGCACCGCCATTGCTGGACCTGAAGCACCGAGATCGGAAGAGCGGTTCAGC	1R	96.78
100045114|F|0	SilicoDArT	TGCAGCGTCACCTCCCCAGGCCCAGGCGTCTCCTTCTCCACAATCTCCACCTTCCTCCCCTCGTCCTCC	1R	96.78
100048733|F|0	SilicoDArT	TGCAGTGCTGTGAACTCCCACGCAGGACGGATGGCAGGTGCGTCCTGTTCAACTTCGGCGACTCAAACT	1R	96.78
100050824|F|0	SilicoDArT	TGCAGAGCTCCCACTGTACTTCTATACTTGAAGGCTTGATCCTCATCCAGTTTTTGTCCAGCATCGCGA	1R	96.78
100054098|F|0	SilicoDArT	TGCAGAGGAGAAGGACAAGCAGTCCGTTCCCTACAGCGACGCTCCGTCTCCAGTGCGCGCCGTGCTCAA	1R	96.78
100055965|F|0	SilicoDArT	TGCAGCAGGAGCAGAAGATACGCAGACAATGTATACTCCAACAGAGTGGTTTATACAGGAGTACTACTC	1R	96.78
100056483|F|0	SilicoDArT	TGCAGCACGCAGGTGACATCGGCATCAACCTGCGATTCTAGGCCCGAGATCGGAAGAGCGGTTCAGCAG	1R	96.78
100059011|F|0	SilicoDArT	TGCAGAGGAGAAGGCCGTTGCAGCTGTCCAAGAGAAAAATGCGTTTGTGGACAGGCAGAAAGTGAAGCG	1R	96.78
100059011|F|0--23:C>T	SNP	TGCAGAGGAGAAGGCCGTTGCAGCTGTCCAAGAGAAAAATGCGTTTGTGGACAGGCAGAAAGTGAAGCG	1R	96.78
100061098|F|0	SilicoDArT	TGCAGATCGTAGCAGGCTCGACGAACGACAAATTCTACTGCCTTTGTTTGGATCAACACTTGCGTGAAA	1R	96.78
100065214|F|0	SilicoDArT	TGCAGAGGAAGGAGCGCCCATGGCGTCGTTCCATCGCCGTCCGAGATCGGAAGAGCGGTTCAGCAGGAA	1R	96.78
100075511|F|0	SilicoDArT	TGCAGGGTGATCTTGGGAGCATGGAGGGAGAGAGGCTGATGGGCTAGATCTTGGACTCCACCGAGATCG	1R	96.78
100082128|F|0	SilicoDArT	TGCAGGTAATGCGGAGGAACTCGTGCGACGACGGTGAGCACCGAGATCGGAAGAGCGGTTCAGCAGGAA	1R	96.78
100082340|F|0	SilicoDArT	TGCAGCGGCAGCACGCGAGCCGCACACACACACACACCAAGCAGCAGGAAGATAGGCTTAACCCGAGAT	1R	96.78
100083301|F|0	SilicoDArT	TGCAGAGGAGAAGGCCGTTGCAGCTGTCCAAGAGAAAAATGCGCTTGTGGACTGGCAGAAAGTGAAGCG	1R	96.78
100085004|F|0--13:C>T	SNP	TGCAGAAAAAGAACGCCAGCCTGGCCGCTCGCCGTGGCCTGGACGCCTGGCGCGTCATGGACCACGACG	1R	96.78
100087957|F|0	SilicoDArT	TGCAGCACCGAAGATCATCACCACCACCGTCGCCTTTGCCTCCTCCTGGCGCCGCCCCTCCCGTCCTCC	1R	96.78
100094343|F|0	SilicoDArT	TGCAGTGTCTCGGCCGACACGCTCGTCGCGCCATCGGTGTTCGCCAGTCCCTATACCAAGCACAAAACA	1R	96.78
100115240|F|0	SilicoDArT	TGCAGAGAAACGTACTCGTAGTCACGTGGACTCGGGTAGGAGACCAACCGAGATCGGAAGAGCGGTTCA	1R	96.78
100116558|F|0	SilicoDArT	TGCAGTGTACTCGTAGTCACGTGGATAGCAGCCGAGATCAGAAGAGCGGTTCAGCAGGAATGCCGAGAC	1R	96.78
tcos109-1R	STS		1R	96.78
tcos144	STS		1R	96.78
rPt-401003	DArT	tgcagggtttgctggaaatggggatcagaggcgtgacggtgtccgatgtgcggggttatggggcgcaaggcgggtcaacggagcggtacgaaggtaatggcccggcccgtggttgtggcgcctaaattgctgaactctatttcaacgtctgtggttcgtcatgtatagtttctgcttccatcagttgtgatccttgtgtcaatgtgttccctagagccaatgttgcattgaattgtgaaaggagtgggtcagggattgttgttataaatagttctcattaacgattaagaaatcattaccacaccctcttgaatgtggtcatgttagttccccccagtcccccatttggtaaaaaaggctgtaatTtgctttgccggattttgttgcttttattgTtct…	1R	97.92
rPt-400861	DArT		1R	99.05
TC72745-1R	STS		1R	99.05
tcos143-1R	STS		1R	99.05
100075625|F|0	SilicoDArT	TGCAGCTAGCAAGTGGCCCATGGAAATTAATGCAGGTGCTGGGTGGTGCGTGTGATGGTGACATACCGA	1R	100.18
100012422|F|0	SilicoDArT	TGCAGCCTGCCGCTGCACGGTCTGCACGTGGGTGATCCGAGATCGGAAGAGCGGTTCAGCAGGAATGCC	1R	101.88
100021069|F|0--17:A>G	SNP	TGCAGCAGCAGCTCAGTAGCTTCCTGTATTCATAGTTCCGCGCAAATCAGAGCTCAACTTACCATAATT	1R	101.88
100028074|F|0	SilicoDArT	TGCAGTACGGAAATTTCCATGTGGAGAAACTTGTCGCATCTACATTAATTTTCATCTTACCAGGAGGTG	1R	101.88
100029593|F|0	SilicoDArT	TGCAGCGTAAGGCAGCAGCGCAGGAGGCTGTAGCAGCGCGCAGCAACTAGTGGGGCAGCAGCAAGAACG	1R	101.88
100030322|F|0	SilicoDArT	TGCAGTCAATTTTTTTTCTCTAGAAAATTGCGGATCTATTTGAGGTAGTCTAGAGAACACCGAGATCGG	1R	101.88
100039269|F|0	SilicoDArT	TGCAGTCAAAAAAAATTCTAGAAAATTGCCGATATATTCGAGGTAGTCTGAACACCGAGATCGGAAGAG	1R	101.88
100058941|F|0--13:C>G	SNP	TGCAGCTCCAGGTCCAGATGATGTCGACGATGGGGACGGCCGAGATCGGAAGAGCGGTTCAGCAGGAAT	1R	101.88
100072266|F|0	SilicoDArT	TGCAGGGCCACGAAGCAGCCGTCGAGCGTGAGGAAAACGGCCGCCGCGGGCCAGAACTTGCCGAGATCG	1R	101.88
100023929|F|0	SilicoDArT	TGCAGGCTCCACACCAACCAACACGTTGCTCCTCATGATCCCTTTTCTCAGATCACCAACTACACTCAT	1R	102.44
100006428|F|0--29:C>T	SNP	TGCAGCAATAACTTCAGATTCCGAGTCTTCTGATAGCATTGTTGCACATATACTTTTTCTTGAGAATTT	1R	103
100020444|F|0	SilicoDArT	TGCAGAGGCAAAGAGCCGATGAGTTATAGTCTATTAGTCTTAGGTTCTGATTTCTCAATGATCCCGACT	1R	103
100025663|F|0	SilicoDArT	TGCAGTGGCAAGAGCCTATAAGTTAGTCTCGGGTTCGGATATATCTCAATGATCCCGACTGATCAGTGA	1R	103
100039315|F|0	SilicoDArT	TGCAGATGCGCAAAGGAACTGATGGACTGAATGGTTCTTCTGTCGAGGTTAGATTAGCTGATCGGATAG	1R	103
100039315|F|0--15:G>A	SNP	TGCAGATGCGCAAAGGAACTGATGGACTGAATGGTTCTTCTGTCGAGGTTAGATTAGCTGATCGGATAG	1R	103
100041119|F|0--23:A>G	SNP	TGCAGCCGCCCAAGGAGTCGCCCACCACGGTGGCCGCGCCTCGTCCTCCGACGCCGCAAGTGCCTGTCC	1R	103
100063519|F|0--11:G>T	SNP	TGCAGGGCCACGGAGCAGCCGTCGAGCGTGAGGAAGACGGCCGCCGCGGCCCAGAACTTGCCGAGATCG	1R	103
100063519|F|0--31:G>T	SNP	TGCAGGGCCACGGAGCAGCCGTCGAGCGTGAGGAAGACGGCCGCCGCGGCCCAGAACTTGCCGAGATCG	1R	103
100067450|F|0	SilicoDArT	TGCAGATGCGCAAAGAAACCTGATGGACTGAATGGTTCTTCTGTCGAGGTTAGATTAGCTGATCGGATA	1R	103
100069375|F|0	SilicoDArT	TGCAGCTCCTCTTCGTCCTTGTCCGACCGCTGCAACCGCGGCCAGGAGCTCCGCGACTTGGAGCGACGA	1R	103
c22891(mTERF)	SNPe		1R	103
3591252|F|0--12:G>A	SNP	TGCAGGGCCACGGAGCAGCCGTCGAGCGTGAGGAAGACGGCCGCCGCGGCCCAGAACTTGCCGAGATCG	1R	103
rPt-411519	DArT	tgcagcggcgcaagtcgcacaggcttctgaagctgagagcagtcaggcaacttctttacgggaacttgatcgccgtcaggataggcctgctcgccaggaaatagtgcgcagagaaacttctgacggcggtgaaggaactcaagtgatggaaatttctgatgacgaggaagaaactgcggcggcgcaaatcacgcaaccttctgaaagtgagaacagccaaacgacttgtgggcaggaacttgatggcgctcaggataggcccgctctccaggaaagagggggcagatgaacttgcaatagcgacgaaggaactgcggtggtgcaagcttgattgcgatggcgacaaggaaactgca	1R	103.58
c22321_112	SNPe		1R	104.13
100005783|F|0--18:G>A	SNP	TGCAGTTTTAGGTCAGGCGGAATGTATTTTCAAGTGATTGATTTATAAACATTTATCCCGAGATCGGAA	1R	104.7
100011761|F|0	SilicoDArT	TGCAGGTCTTGTCTGTTACCTTTATTTAGTGATCAATTATCTGTAGCCATCAAAAAACCGAATCTGATT	1R	105.27
100076761|F|0--57:C>G	SNP	TGCAGGTGCCGCCGTCGCCGCCTTCTTCTTGGCTGCGGGCACCGTCTTCTTCTTCTTCTCGGCAACATC	1R	105.27
100083963|F|0	SilicoDArT	TGCAGCACACGCACGGCGTTTCGTCACCTCAAAAAAGCAGCATGGGGGATAACGACGTACGCACGGAGT	1R	105.27
c5796_784	SNPe		1R	105.27
tcos134-1R	STS		1R	105.27
rPt-410937	DArT	tgcagtgcactctagtccattaggtggatctgtggatggtgatggtagtacgtgggacagagcgccgcggagccctgcatcaaaggagaataagaggacggatgcatgggtgagttaagcggtgaatgtgcaggaaatggcaagcatccatgagaagcaggcagcggcgcgtttcccccttaacccagacaaaagtaacctgcaaacatcaagatattttgattatttagaaataagttcagaacacatcagtaattacaaaaatagaagatgtgttgaacaacaaaacagattatggacgtcatacgatcaaaagagaattgtgcattttttgtagggtaatttcttcagatcccttatctagcgatggcaatcaaaagagaattgtgccctttttgt…	1R	105.83
100001511|F|0	SilicoDArT	TGCAGAGCTAGAAGGCCTCCCTGTTGAGCTGCTCCACCGAGATCGGAAGAGCGGTTCAGCAGGAATGCC	1R	106.39
100001511|F|0--30:G>A	SNP	TGCAGAGCTAGAAGGCCTCCCTGTTGAGCTGCTCCACCGAGATCGGAAGAGCGGTTCAGCAGGAATGCC	1R	106.39
100001829|F|0	SilicoDArT	TGCAGTGCAGTAATAAATCCACGCGACCACACTATCCTCCCGAGATCGGAAGAGCGGTTCAGCAGGAAT	1R	106.39
100003768|F|0	SilicoDArT	TGCAGCTCGTCTCCGAGTCTCCATAACAGACTTGATTACCCGAGATCGGAAGAGCGGTTCAGCAGGAAT	1R	106.39
100004330|F|0--53:T>C	SNP	TGCAGATGATTGCTGGGCAGAACCCGAACGTGATGCAAAGGTTTGTGCAGAATTTGCCCTCCCACCGAG	1R	106.39
100006471|F|0	SilicoDArT	TGCAGTTTATTGCTTCCACTAGTTTTACTCATTGATGTATGGTTGCCTCTGCGAACTAACGCCAGCATT	1R	106.39
100006746|F|0	SilicoDArT	TGCAGAGATTTGCCCAACTTTTATGATTTCTGCATAGGTCTACAAATACATCAGTTACTACTCTCAGTA	1R	106.39
100006746|F|0--53:G>A	SNP	TGCAGAGATTTGCCCAACTTTTATGATTTCTGCATAGGTCTACAAATACATCAGTTACTACTCTCAGTA	1R	106.39
100008351|F|0	SilicoDArT	TGCAGATCACGAGGCTGGGTGTTGTAGCTGGTGCGACCAGGAAATGAGCTTGCACAGCTGTCCGAGATC	1R	106.39
100009163|F|0--30:A>G	SNP	TGCAGCAGCAGGTCGAGGTCTAGAGTCTAGACAGAGACCGAGATCGGAAGAGCGGTTCAGCAGGAATGC	1R	106.39
100010470|F|0	SilicoDArT	TGCAGCAGTGTCATGGACGCACGTCAGAAAGAGGCAAGGAAGCAGAATCTCTTGACAAGCTTCAACGAT	1R	106.39
100010505|F|0--10:T>G	SNP	TGCAGTGCTGTGTCGCCTGGGCCATGATGGGGCCTGCGCCGAGATCGGAAGAGCGGTTCAGCAGGAATG	1R	106.39
100012633|F|0--40:C>G	SNP	TGCAGCATGTTCACTGAGATCTTTTCATCAAGTCCATCAGCCGTAAGCTCATGCATGATATTACTGTGA	1R	106.39
100012634|F|0	SilicoDArT	TGCAGTTGCCTTCAGGTTTCAGGACTTCCTTGTCGTCAACCTACCATCACAACTTCCCACGGAAGCAGG	1R	106.39
100012932|F|0--61:A>G	SNP	TGCAGATTCTGCATAAGAACGGGGCGAGGAAGTTCTGGATACACGGGACAGGCGCGCTGGGATGCCTGC	1R	106.39
100013254|F|0	SilicoDArT	TGCAGATCACGAGGCTGGGTGTTGTAGACTTGTAGCTGGTGCGACCAGGAAATGAGCTTGCACAGCTGT	1R	106.39
100013418|F|0	SilicoDArT	TGCAGCTAGACTTGAGAATGTTGCGTACGCTTCTGGCCCTTTCTCCCACTCCCAGTTCACACGGGAAAT	1R	106.39
100014033|F|0	SilicoDArT	TGCAGACCCAAACTGATTCAACATTGTGAAACCAGATCTTCTTCGTCAGGAAAGCGACGGCCGATGGAA	1R	106.39
100014033|F|0--31:C>T	SNP	TGCAGACCCAAACTGATTCAACATTGTGAAACCAGATCTTCTTCGTCAGGAAAGCGACGGCCGATGGAA	1R	106.39
100014033|F|0--66:G>A	SNP	TGCAGACCCAAACTGATTCAACATTGTGAAACCAGATCTTCTTCGTCAGGAAAGCGACGGCCGATGGAA	1R	106.39
100014255|F|0	SilicoDArT	TGCAGAGCTGGTAAACAGGCACTCCGCGAATTTCAACTATAACTCCATCTGCTCCGAGATCGGAAGAGC	1R	106.39
100014255|F|0--33:C>T	SNP	TGCAGAGCTGGTAAACAGGCACTCCGCGAATTTCAACTATAACTCCATCTGCTCCGAGATCGGAAGAGC	1R	106.39
100014281|F|0	SilicoDArT	TGCAGCAGAAGGGATAATTGGAGACCCAGCAGAACACAATAATTCCAAGCAGCATAAGAAGTCTCCAGT	1R	106.39
100014607|F|0	SilicoDArT	TGCAGTGCTGAAGTGTGGTCAGGGCGTTACCTGCGTTTTGTTCCAGCTCCGAGATCGGAAGAGCGGTTC	1R	106.39
100015384|F|0	SilicoDArT	TGCAGTCGTACGTATAGCAGCGCCGCTTTGGAAAAACCCTCACGATCGCATCGCCTAAAAGCTTCTCTT	1R	106.39
100015697|F|0	SilicoDArT	TGCAGTTACTGAGAATATATATCTCATTCTTCAAAGATTTACTGGACCAGGCCAGCTGAGAAATCCCGA	1R	106.39
100016400|F|0	SilicoDArT	TGCAGAACACAAACACCACATCAGTGGTATGTTTTTAGGTGTTTCTCAGCCATATAGACTTGAATCAAT	1R	106.39
100017921|F|0	SilicoDArT	TGCAGTTTATTGCTTCCACTAGTTTTACTCATTGATGTATGGCTCTGCGAACGAACGCCAGCATTAGAT	1R	106.39
100019251|F|0	SilicoDArT	TGCAGCATATTCTGATTGTTATGCTTCTACCTGTAATATCTTTTCAAGTCAGGTTTGAAATATAATCAC	1R	106.39
100019251|F|0--17:G>A	SNP	TGCAGCATATTCTGATTGTTATGCTTCTACCTGTAATATCTTTTCAAGTCAGGTTTGAAATATAATCAC	1R	106.39
100019767|F|0--59:C>T	SNP	TGCAGGCCGCCTTGTTATCCTTGTGTTCTTCTTTTCTTTTGATGGGAATGTTTTCCTTTCGTTCTGACG	1R	106.39
100019835|F|0	SilicoDArT	TGCAGTCTGCAAAGTCGGATCCTCCTTTTTTTCAGTCAGCCGAGATCGGAAGAGCGGTTCAGCAGGAAT	1R	106.39
100020745|F|0	SilicoDArT	TGCAGAGGACCAAGCCTTGGTGTGTTGTCTTGATAGCCGTGAGTGGGATGACATCCACCACTCCGCCAA	1R	106.39
100025711|F|0	SilicoDArT	TGCAGGCACGAAACCAGAAAGGGAAAAAGTCGTTCCACTCGCGCACGTAATCCTGGAATTGTTGGACCA	1R	106.39
100025711|F|0--36:A>G	SNP	TGCAGGCACGAAACCAGAAAGGGAAAAAGTCGTTCCACTCGCGCACGTAATCCTGGAATTGTTGGACCA	1R	106.39
100026180|F|0	SilicoDArT	TGCAGAGTGTATACCATAATGCCACACCGAGTCGGAAGAAAACCACCTAAAATAGCACGAGGGACTAAA	1R	106.39
100026544|F|0	SilicoDArT	TGCAGTCTGCACTGCCTTCATAGAGGCTATGAACACAGATACTGCTTTTTACAGGTTCACGGAAAACAG	1R	106.39
100026598|F|0--28:C>T	SNP	TGCAGTGTAGCATCGGCGGTGGCTGCAACGGAGCTTTGTTGTGTTGCTAGCAAGGGAAGGGCTCCTGCT	1R	106.39
100027072|F|0--50:G>A	SNP	TGCAGCATTAGGCACCAAGGTAACTAAGACTGAAACCAGACATTATACATGACAAAGTGCTGAATTGCA	1R	106.39
100027072|F|0--60:T>A	SNP	TGCAGCATTAGGCACCAAGGTAACTAAGACTGAAACCAGACATTATACATGACAAAGTGCTGAATTGCA	1R	106.39
100028657|F|0	SilicoDArT	TGCAGGTACCAGGGATGTCACATTTTTACCAGTTCGTGCCGTCCTCAACATAGACAATGGACGAATAAT	1R	106.39
100031044|F|0--54:C>G	SNP	TGCAGGCATCCACTAGATTAGCAACGCTCCCACCTCAGTCCTCAGTCAGTAAAGCAAGAAGCGGACAAA	1R	106.39
100031161|F|0	SilicoDArT	TGCAGACACTCGTTGTTGACATGTTTCTCTTCGCCCTCACATCTTCAGTTGGAATAGAGTGGCATGCCA	1R	106.39
100031161|F|0--45:C>T	SNP	TGCAGACACTCGTTGTTGACATGTTTCTCTTCGCCCTCACATCTTCAGTTGGAATAGAGTGGCATGCCA	1R	106.39
100032335|F|0	SilicoDArT	TGCAGTAAACTTCAGACGATGCTTATCTTTTAACCAGAGCAGTTTTCACCGAGCTACCACCATAGTTGC	1R	106.39
100033460|F|0--11:G>T	SNP	TGCAGTCCTGAGAGGATTCATTGGTACTTTTATGAGGATTCACTGGTACTAGAGCAGGGCAGGCAATGA	1R	106.39
100033850|F|0	SilicoDArT	TGCAGTTCCACGCCACCCAGGCACGCCACGATCCCCCGCTCGCTCCGAGATCGGAAGAGCGGTTCAGCA	1R	106.39
100033914|F|0	SilicoDArT	TGCAGCCGCCAATCCCCGCAGATCCTCTCCACATGTGCCGCGTCCGTAGCCCATCCACTGCTACTCGAG	1R	106.39
100034240|F|0	SilicoDArT	TGCAGTGCCGCTCGCATCCAGCACACGTGTGTGCGTGCGAGCACACGCACCACCACCCAGCCCCCTCGC	1R	106.39
100034240|F|0--19:A>T	SNP	TGCAGTGCCGCTCGCATCCAGCACACGTGTGTGCGTGCGAGCACACGCACCACCACCCAGCCCCCTCGC	1R	106.39
100034742|F|0	SilicoDArT	TGCAGGCACGAAACCAGAAAGGGAAAAAGTCGTTCCACTCGCGCACGTAATCCTGAATTGTTGGACCAG	1R	106.39
100037493|F|0	SilicoDArT	TGCAGCACCCATCAACCAGCGGGCCATCCCAGAACGACGACGAAAATACGCAGTCAAATTTATGGGCGC	1R	106.39
100039576|F|0--13:C>G	SNP	TGCAGAAAGCCTTCAAAGTCCTCCTTGGCGACATGCGTGACCCCAAAATGCTCTACTCGGACAGGGGTC	1R	106.39
100041400|F|0	SilicoDArT	TGCAGCCCGTGCCTCTGCGTCGCGCGAAAAGCGCCTGCCTCTATCCCTTGTGCATTGACCCAGCCCCAT	1R	106.39
100044108|F|0	SilicoDArT	TGCAGGACACAAACAATCAGTCGAGCACCTCGCGCGCGCGCGCCACGAGATCAAACCACAACACAAGCA	1R	106.39
100047551|F|0	SilicoDArT	TGCAGCCAAATTAAGAATCATCAGACAAAAAAAAACTACCAACCACTCCCAGATCGATCTAACAGTAAT	1R	106.39
100049610|F|0--33:A>T	SNP	TGCAGAGGCTGCTGAAGTTGTCTGGAACCGTGGACTTCTCAAGCGAGTTGGAATATGCCACGGTATAAG	1R	106.39
100051279|F|0	SilicoDArT	TGCAGGGGTGGAGATGCTCAAGTAGTAATTCAGGTTTCAGAAAGAGAAAGGGAGGTTTCACCCGAGATC	1R	106.39
100051385|F|0	SilicoDArT	TGCAGTCCCGGGGGACATGGCACTTGGGTGTGCAAAAGAATACATACCCTCTAGTACCGAGATCGGAAG	1R	106.39
100053555|F|0--50:C>T	SNP	TGCAGGAGAGGGAGTCTCTCGGCCGCCTCGAAGAGCATAAGCACGTCCGACGCAGACGTGTAGCACAGC	1R	106.39
100055152|F|0--52:C>T	SNP	TGCAGCGATGGAACAGGACGCGGTGGCTCTTCCCGCTCAGGATCGTCTTCGCCCTCGTCAAAATCCTCT	1R	106.39
100060794|F|0	SilicoDArT	TGCAGAGAGGGGGGCATTTGCATATGCTTTGGCTAATGAGGACGAGCGTCACCCACCGCACTAGCTCTT	1R	106.39
100069424|F|0	SilicoDArT	TGCAGCCAACACCATCGCGTCGCGTAGTAGGAACGACGCACAAGCTCCGAGATCGGAAGAGCGGTTCAG	1R	106.39
100069424|F|0--23:G>C	SNP	TGCAGCCAACACCATCGCGTCGCGTAGTAGGAACGACGCACAAGCTCCGAGATCGGAAGAGCGGTTCAG	1R	106.39
100080097|F|0	SilicoDArT	TGCAGAAAAAGAATTTAGTAGTGTTAGTGTCAGGTATTTGTGTTCCACTTATTTTCTTTTCAACAAATC	1R	106.39
100081926|F|0--64:C>T	SNP	TGCAGAACACCACCCAGTTCGGCCTCATGGCCGTCAGCCTCGGCTACTACGACACCCTCATGTCCTGCT	1R	106.39
100082126|F|0	SilicoDArT	TGCAGGTACCAGCGATATCACATTTTTATCAGTTCGTGCCGTCCTCAACATAGACAATGGACGAACAGT	1R	106.39
100085444|F|0	SilicoDArT	TGCAGCTTCCGCACCGCCACATCTCCTTCGCCGTTCCCCTTGGCTCCGTCGTCCTCCTCCTCCCCTCGC	1R	106.39
100086094|F|0	SilicoDArT	TGCAGTGCGGTGCGTGTGGCTACATGGGGGTAGCACCGAGATCGGAAGAGCGGTTCAGCAGGAATGCCG	1R	106.39
100088504|F|0	SilicoDArT	TGCAGTAGCGCAGCGATGCGAACGAGGGCTCAACGACCGAGATCGGAAGAGCGGTTCAGCAGGAATGCC	1R	106.39
100090304|F|0--40:A>G	SNP	TGCAGCTGGGCCCGTCGGGCACGCTGGTGGGCTACTGGCCATCCTCCCTCTTCACCCACCTGGGCGCGC	1R	106.39
100092041|F|0	SilicoDArT	TGCAGGGCATCTACGTCAAGGTACTCTTCCTGTGGATCCCCGTCGCCGAGGTTGACCGCACCGAGATCG	1R	106.39
100092505|F|0	SilicoDArT	TGCAGCTTGGGCAGTTTGGGGCAGTCGATGAAGGTCTCGCCGTTCTTGTCCACGCAGAGGTAGATCTGG	1R	106.39
100092794|F|0	SilicoDArT	TGCAGCGTCTGTCAATGTCGCCCGAGATTGCTCGCGCAATCGTCGGCCACAGCGGCGTCCGTCCGCTCA	1R	106.39
100092794|F|0--64:G>A	SNP	TGCAGCGTCTGTCAATGTCGCCCGAGATTGCTCGCGCAATCGTCGGCCACAGCGGCGTCCGTCCGCTCA	1R	106.39
100097398|F|0	SilicoDArT	TGCAGAGAGATGTTAGAGGAAGACGAGTACAAGACACGTTGTCCCAGGCCTGGGTCCTTTCTTTGAGGT	1R	106.39
100116785|F|0	SilicoDArT	TGCAGTGCGGTGCGTGTGGCTACATGGGGGTAGCTCCGAGATCGGAAGAGCGGTTCAGCAGGAATGCCA	1R	106.39
100145969|F|0	SilicoDArT	TGCAGAGTGAGGTGGGGATTGAGGGAGAGGAGGCCAGTTGGGGACAGCCGAGATCGGAAGAGCGGTTCG	1R	106.39
c11173_427	SNPe		1R	106.39
c39807	SNPe		1R	106.39
rPt-400399	DArT		1R	106.39
tcos1339-1R	STS		1R	106.39
tcos138-1R	STS		1R	106.39
tcos159-1R	STS		1R	106.39
tcos162-1R	STS		1R	106.39
tcos65-1R	STS		1R	106.39
tcos67-1R	STS		1R	106.39
wPt-11732	DArT		1R	106.39
100136428|F|0--62:G>A	SNP	TGCAGAGTGTATACCATAATGCCACACCGAGTCGGAAGAAAACCACCTAAAATAGCACGAGGGACTAAA	1R	106.39
3743046|F|0--66:G>A	SNP	TGCAGCATTAGGCACCAAGGTAACTAAGACTGAAACCAGACATTATACATGACAAAGTGCTGAATTGCA	1R	106.39
100006471|F|0--56:T>G	SNP	TGCAGTTTATTGCTTCCACTAGTTTTACTCATTGATGTATGGTTGCCTCTGCGAACTAACGCCAGCATT	1R	106.39
Xscm1.178	STS		1R	106.94
Xscm1.192	STS		1R	106.94
100001552|F|0--53:C>G	SNP	TGCAGCAGTGAAGTTGGTATCTGGCCATGGAGCTGGTTGTAGGACAGGTTCAGCCGCTCCAGCTTCACG	1R	107.5
100001876|F|0	SilicoDArT	TGCAGGCTCTGAGGATGAAGATTCTCCTCCAAGCTGTGCTCACCGAGATCGGAAGAGCGGTTCAGCAGG	1R	107.5
100002258|F|0	SilicoDArT	TGCAGGCATAAACAGTACCGTTTGAGTCAATTTCATGCGTTCTGAGAAAGCGTATTTCCGAGATCGGAA	1R	107.5
100002454|F|0	SilicoDArT	TGCAGGAGAGCCATATGCAAGCATCTTAAGTGATGCGGTCACCTTCTGAAACCCAAAAGGCCGAGATCG	1R	107.5
100002478|F|0--50:C>T	SNP	TGCAGCACAAACAGCATTGTTGTTGAAAGTAGTTCTTGGATGATGGTAAACATACCTTTTCACGATAAG	1R	107.5
100002722|F|0	SilicoDArT	TGCAGAATTCATTCAAGTTCAAGGCCGTCGTAACTTCACCGAGATCGGAAGAGCGGTTCAGCAGGAATG	1R	107.5
100003246|F|0	SilicoDArT	TGCAGACATCCTCACGTACCGTTGGAATGGAGCACAGCTTTATTTGACTGACCGAGATCGGAAGAGCGG	1R	107.5
100003340|F|0	SilicoDArT	TGCAGTCAACGCAGGAGGAGGAGCAGATCGACACTCAGCTCAAGGGCAAGGCCTCAACCGAGATCGGAA	1R	107.5
100003340|F|0--7:A>G	SNP	TGCAGTCAACGCAGGAGGAGGAGCAGATCGACACTCAGCTCAAGGGCAAGGCCTCAACCGAGATCGGAA	1R	107.5
100004472|F|0--43:T>A	SNP	TGCAGCCACCCTCTCTCTGTGTATAAGCCATTAACAAAGAAACTGGACATACCCTAATCAGTCAGCCGC	1R	107.5
100004542|F|0--58:T>C	SNP	TGCAGTTTTTGGCCAGAAACATTTTAGTACGTGTCACGAGCTAACAAATGTTTATGATTGTAATATCTT	1R	107.5
100005277|F|0--50:T>C	SNP	TGCAGCTGCATGCCAAGTTGCCAATGTTCTCGTCATTTCATCGTTCATTCTGCTGCCATAATCATGGAG	1R	107.5
100005389|F|0	SilicoDArT	TGCAGCTAGTAGTTTACTCTCCCATCTGTCGACCAGCTCGGTGCAGCACGTGGAGAAAGCCGAGATCGG	1R	107.5
100005576|F|0	SilicoDArT	TGCAGGTATCAAAACAATATTACATTGTTGATTACGCAAGATGAGGATCTCATATCTGGCCAAAATACT	1R	107.5
100005576|F|0--14:C>T	SNP	TGCAGGTATCAAAACAATATTACATTGTTGATTACGCAAGATGAGGATCTCATATCTGGCCAAAATACT	1R	107.5
100005965|F|0	SilicoDArT	TGCAGTATATTTCATCAGGAGTAGGACAATTTGGTCAAGAACGCGGGCTTTGCAACATGCCTTCTCTGA	1R	107.5
100005965|F|0--43:C>T	SNP	TGCAGTATATTTCATCAGGAGTAGGACAATTTGGTCAAGAACGCGGGCTTTGCAACATGCCTTCTCTGA	1R	107.5
100006179|F|0	SilicoDArT	TGCAGTCCTCAATCAAGACGCCGACAACTCAACTGGCCGAGATCGGAAGAGCGGTTCAGCAGGAATGCC	1R	107.5
100007506|F|0	SilicoDArT	TGCAGAATTGGTTGGAGATGCACCCACCTTGTTGGTGTAGATGGTCCAGTTGGTGAAGAGCTCCGACAG	1R	107.5
100007745|F|0	SilicoDArT	TGCAGCAGACTAGCACGAAGGTATCACCTCCTCGACACCATTCAGTTTCATCACCGAGATCGGAAGAGC	1R	107.5
100008049|F|0	SilicoDArT	TGCAGTCCAAGGCCTGAGTGGACTTTGGTACTGGTACTTTCAGCCAGGGTCCGAGATCGGAAGAGCGGT	1R	107.5
100008437|F|0--43:T>C	SNP	TGCAGAAAAGCAATAGAACTGAACTGTACCAGAAAGATGGGGCTGCATTATTCCGAGATCGGAAGAGCG	1R	107.5
100009135|F|0	SilicoDArT	TGCAGTATTTGGAAACACTGGACATAACAAATACCAGAATTCTAGAAATGCCATTTGCTGTTACAAGCC	1R	107.5
100009302|F|0	SilicoDArT	TGCAGAGCAACGGTTTCTTTATGTGATGCCAAAGAGAAGAGGAAAAGTGAGCGCCCGTTTGCTCGCTCG	1R	107.5
100009345|F|0	SilicoDArT	TGCAGTTAACATCCCGCCCTAGCTAGGATTCCTAGTTCCCACCAGTTCAAAAAACACTTGGCCTAGAGT	1R	107.5
100009529|F|0	SilicoDArT	TGCAGGGCATGTTCTCCCCGTCATCATCATCATCAGCAGCTCAGGCATGCATGCATCTTTCCTCCGAGA	1R	107.5
100010078|F|0	SilicoDArT	TGCAGGGAGAATCAAAGCCAAGATAGATGTTAGCCATACGTTCATGACAAATTAATCGATCTAGCGCTT	1R	107.5
100010111|F|0	SilicoDArT	TGCAGGGAGAATCAAAGCCAAAGATAGATGTTAGTGCCATACGTTCATGACAAATTAATCGATCTAGCT	1R	107.5
100010706|F|0	SilicoDArT	TGCAGATTTCTGCCTTGAAATATAAGAAGTCAACTCTACACTTTCTTTAGCGATTTTGGAGAAGTGTTG	1R	107.5
100011420|F|0	SilicoDArT	TGCAGGATGCATGGCTGCTGTAACTCTGTGGTAGTATTTCCCAGCTACACCGAGATCGGAAGAGCGGTT	1R	107.5
100011420|F|0--29:G>A	SNP	TGCAGGATGCATGGCTGCTGTAACTCTGTGGTAGTATTTCCCAGCTACACCGAGATCGGAAGAGCGGTT	1R	107.5
100011844|F|0--38:A>C	SNP	TGCAGGAGCAGGCACAAACTGTGGAGGCTGTGGACCAGATCCGAGATCGGAAGAGCGGTTCAGCAGGAA	1R	107.5
100011959|F|0	SilicoDArT	TGCAGTCCTATGTGACACACTCTCATCAAGTGGAAGCACTGCGAGGAATTGTTTCTATTCCGAGATCGG	1R	107.5
100012542|F|0	SilicoDArT	TGCAGACTGCTGAAGTGTACTTTGAAAATTTTACATTGTTGACCATGCATGACCTGGTGCATGATCTAG	1R	107.5
100012887|F|0	SilicoDArT	TGCAGGTCCTCGGAAATAACGGATCATCTCCTCTTTGATTGCTGCCGCGTCGCCAAGTTCCATCAGGGA	1R	107.5
100012985|F|0	SilicoDArT	TGCAGGATGCATGGCTGCTGTAACTCTGTAGTAGTATTTCCCAGCTACACCTGTGAATCCAGCTTGGTT	1R	107.5
100012985|F|0--54:G>A	SNP	TGCAGGATGCATGGCTGCTGTAACTCTGTAGTAGTATTTCCCAGCTACACCTGTGAATCCAGCTTGGTT	1R	107.5
100013517|F|0	SilicoDArT	TGCAGCGTTTTTGGAGGTTTGCAAAGCCTGACCAACCAGTGATTGGTACCATGTGTCCGAGATCGGAAG	1R	107.5
100014027|F|0	SilicoDArT	TGCAGTTAGTAAGTGGAGCAGAAGAATAAACACTAACATGTGCAGAAAAAAGTGTGATGTGGTTCCCGT	1R	107.5
100014216|F|0	SilicoDArT	TGCAGGGTGCAGGCATGCCATCCATGCGCAACAGAAATGTCAGAAACAACCAAAACAATCTGGACTTGT	1R	107.5
100014223|F|0	SilicoDArT	TGCAGTGCATTATCTGTCTGCTTGCCCATTTCTGTTAGTGTGATCTGTGATGGTTAGGTACATAATCGA	1R	107.5
100015267|F|0	SilicoDArT	TGCAGATTACTTCTTCTACCTCCAGACGTTTTCTTCCACCTGCCAAATGTGCCACCGAGATCGGAAGAG	1R	107.5
100016723|F|0	SilicoDArT	TGCAGCTCACCAGCCTGAACCGCCTCAACCTGTCGGACAATCTCCTCTCAGGCGCGATACCCTCTGTGC	1R	107.5
100016723|F|0--62:T>G	SNP	TGCAGCTCACCAGCCTGAACCGCCTCAACCTGTCGGACAATCTCCTCTCAGGCGCGATACCCTCTGTGC	1R	107.5
100017487|F|0	SilicoDArT	TGCAGATTCATGGGATGACACCCTTCAAATGGCCGAGATACAATCATCAAGTGCACCAAAGTGTTCACT	1R	107.5
100017537|F|0	SilicoDArT	TGCAGGTATTGGCAAGAAACAGGTGAGAGGAAATTCAGAAGGGAAAAAGCAGTTGCCGCTTGATGCTGT	1R	107.5
100018098|F|0--25:C>T	SNP	TGCAGAGGCCAGGCCACAAGACGATCCCAGTGTGTAGGTATCGGCGTACGCATCTGGCTCCACCGAGAT	1R	107.5
100018414|F|0	SilicoDArT	TGCAGAAGCTCGGGCTGCACAGCCACGACCATACCGTCCACTCCCTCATCACCATGTACTCCAACCTCG	1R	107.5
100018414|F|0--31:T>C	SNP	TGCAGAAGCTCGGGCTGCACAGCCACGACCATACCGTCCACTCCCTCATCACCATGTACTCCAACCTCG	1R	107.5
100018589|F|0--64:C>T	SNP	TGCAGCAGATTCTTCTTACCAAGCCGAGCGAGCTGTTTCGTGTAAAATCAAATCTTCGCGTCCGCCTGT	1R	107.5
100019383|F|0	SilicoDArT	TGCAGCCGTCTTTGTTGTCGCTATGAACGTTCTGCCAGGCTGCCACGACAAAGCGTTCTTTCCACGGCT	1R	107.5
100020127|F|0	SilicoDArT	TGCAGCTGCATCAAGTCCACGGCGACAATCACCGAGCCACTTCCACTTCTGCGAGCAGCTACCTCGCCA	1R	107.5
100020397|F|0	SilicoDArT	TGCAGCATCCTCCACCCTCTCCACGACCTGACCATTTCAGGTGATCCCCCTAGGTTGCTACACTTGCTA	1R	107.5
100020657|F|0	SilicoDArT	TGCAGAACCTGAAGACGCTGCTCCTCTACTCCAACTCCCTCGTCGGCACCATCCCTCCAGAGCTGGGCC	1R	107.5
100020898|F|0	SilicoDArT	TGCAGTGTCGGTCCAACCAAGGCATGATGCTCTTCTTTAAGCTCCATCTCTTCGGTCCACCCCGTACTA	1R	107.5
100021030|F|0--29:T>C	SNP	TGCAGGTACGAGCAGGGACCCAACTGGCATATGTCCGAGATCTTTCGGACGAGCCGAGATCGGAAGAGC	1R	107.5
100021210|F|0	SilicoDArT	TGCAGGTACTCCATTAGCAACTGATGCAGCAAAACGGGGATTCTCCATGATGAGGTTGAGGACGCGAGC	1R	107.5
100021210|F|0--46:A>G	SNP	TGCAGGTACTCCATTAGCAACTGATGCAGCAAAACGGGGATTCTCCATGATGAGGTTGAGGACGCGAGC	1R	107.5
100021563|F|0	SilicoDArT	TGCAGCGTCCTCCGCGGCGAAGACTTTGCTGCGTCCCCGTTCTCACTGTCGCCGCAAAGAGCAAGAGTC	1R	107.5
100022003|F|0	SilicoDArT	TGCAGGTCGGGCTTTGTGATGTAACTTGTGAAATCACGGTGCTTATAACTGTTGGAATACAGGGTTGCT	1R	107.5
100022070|F|0	SilicoDArT	TGCAGCTTGGCCATGAGTTGATCAGGCTTGCGCATGAGCTCGGCCATGGCGAACTCTAAGACCAAAGAC	1R	107.5
100022511|F|0	SilicoDArT	TGCAGCAGAGTTGTAGTTTGCCAAAGAAAAAAGGACACCCCAACCGAGATCGGAAGAGCGGTTCAGCAG	1R	107.5
100023702|F|0--49:A>G	SNP	TGCAGCTGGTGACATACATAATATCTAGTCGAAACTAAACTTACTCCTCAGATATAAACCACGGTCGAC	1R	107.5
100024224|F|0	SilicoDArT	TGCAGACATCCTCACGTACCGTTGGAATGGAGCACGGCTTTATTTTGACTGACTGGTAAGAACTGATCG	1R	107.5
100025085|F|0	SilicoDArT	TGCAGCAAGAACCACTTTCACACTGTACGAGCCTACAGGCACGAAGTATATATTCAACACGGTATATCA	1R	107.5
100025800|F|0--18:G>A	SNP	TGCAGATTACATGACATGGATCAAATTGGTTTCAAATGTGAAATGTACGACAAACCTCATTCTTCACTT	1R	107.5
100025800|F|0--48:G>T	SNP	TGCAGATTACATGACATGGATCAAATTGGTTTCAAATGTGAAATGTACGACAAACCTCATTCTTCACTT	1R	107.5
100027352|F|0	SilicoDArT	TGCAGCTAAAAACTGAATTTATGCTTCAGCACGATCATACGAGTAGCCAAAGATTTTGTACATCAGCAA	1R	107.5
100027445|F|0--58:G>T	SNP	TGCAGCGATCCTGATAGTAGACCATGTAAACAGGTTCTGAAAACGAGAAATCAGATGCGCGTTGAAGTT	1R	107.5
100029487|F|0	SilicoDArT	TGCAGCCAAGTGTTAATACAGTTGGGCCACAACAAAAGGTGTCATTCTCATCCTCAGTATGTACGGTAC	1R	107.5
100029730|F|0	SilicoDArT	TGCAGCGATTTCAATTCAGCGGAACAATGTGAGAGAAGCGAGCACTGTGCGGAGGGAGAAAAGCTGAGG	1R	107.5
100029766|F|0	SilicoDArT	TGCAGCAGTGCAGCTCCTCTCCGAGTCTGCATAACAGACTTGATCCGCCGAGATCGGAAGAGCGGTTCA	1R	107.5
100030649|F|0	SilicoDArT	TGCAGTGAAAGGTGAAAGGCTAGCAAACATGGATGCGAAGTGATGGGTCACGGGCACTCAGCTGAAAAA	1R	107.5
100031877|F|0--52:T>C	SNP	TGCAGCTGCCATCCGCTCCAGTACTGCGCACCTGTGCCGCAGTTGGCATCTGTCGCCGAGATCGGAAGA	1R	107.5
100032332|F|0--29:A>G	SNP	TGCAGTATCAGAAGACAGAAAAGAAAATAAAAAAAACAACAACAAAATGCAAGAGAAAACCACCAAACT	1R	107.5
100032429|F|0	SilicoDArT	TGCAGCATTTTGACGCACGCGGGCGTCAAATAGGGTTCGCCTACAGAAGGTCTCGATTAGCTAACCGAG	1R	107.5
100032564|F|0	SilicoDArT	TGCAGGCAGCTCCCCAATTCGCGCGCCGCAGATTCCGAGATCGGAAGAGCGGTTCAGCAGGAATGCCGA	1R	107.5
100032564|F|0--9:C>T	SNP	TGCAGGCAGCTCCCCAATTCGCGCGCCGCAGATTCCGAGATCGGAAGAGCGGTTCAGCAGGAATGCCGA	1R	107.5
100032697|F|0	SilicoDArT	TGCAGATGATATTGGTGTCAGACTGTCAGTAAGGTGTGGCTTCTGTTTCAAATATTTCAGCAATTACCG	1R	107.5
100033843|F|0	SilicoDArT	TGCAGACCTCCAAACGCCAGCCCCGCGCAGCCGCACTACAGCGACGCCCCGACCAACACGCCCCAACGG	1R	107.5
100033877|F|0	SilicoDArT	TGCAGCAAACGCTCTGTTTGTCAGAATTTGTCATATGTTTTGGAAGAAAATGCCATAAAAAAGGTTCGT	1R	107.5
100036270|F|0	SilicoDArT	TGCAGTTGCCTTGTGCCCCATCATGCACGCACACGCACGCCTGTGCTCGAACGCAAGGAGCAGCGGCCT	1R	107.5
100036566|F|0--13:C>A	SNP	TGCAGCGACCCCCCTTAGCCTCGCTGTCGCTCCCACCCGAGATCGGAAGAGCGGTTCAGCAGGAATGCC	1R	107.5
100037307|F|0	SilicoDArT	TGCAGGCACCCATCAACCAGCGGGCCATCCCAAAACGACGACGAAAATACGCAGTCAAATTTATGGGCG	1R	107.5
100037307|F|0--32:A>G	SNP	TGCAGGCACCCATCAACCAGCGGGCCATCCCAAAACGACGACGAAAATACGCAGTCAAATTTATGGGCG	1R	107.5
100037902|F|0--29:T>C	SNP	TGCAGGTGCAGGTAAGCCGCCTGGAAAGATGACGTCGTCGCGAGTGCCGCCTCCAAGGCGGCCTCCTCT	1R	107.5
100039339|F|0	SilicoDArT	TGCAGTGCGTGCTGGTTTGCAACTGCTGTTTACTGTGTTTCTCTTGGGTACATGGTTAATGGATGTGTG	1R	107.5
100040872|F|0	SilicoDArT	TGCAGTGCTCCATCCGCCATCGCCTCCAGTGCTCCCGCCGCCATCGCCGAGATCGGAAGAGCGGTTCAG	1R	107.5
100041062|F|0	SilicoDArT	TGCAGCAGGTGAGTCACCGCACTGCCACGCTGCCAAGTCGCCGTTGCCATCGCGCACTTCTTGCCTTGA	1R	107.5
100042339|F|0--52:C>A	SNP	TGCAGAACCACCTCCCGCTTCAGAATTCATGCCCAGAGACGAAGCACGACGCCAGTTTGCATCAGGGAT	1R	107.5
100042701|F|0--15:C>G	SNP	TGCAGCACAGGACAACTTGTTTGCCACTACTTTACCTGTAAATTCTAGAAATATTGTGCACGTAGGGCG	1R	107.5
100044147|F|0	SilicoDArT	TGCAGAGAAGGCCCTTACCAGAGTTCTGGCGGGACTGGGATAAACCTATTGTAAGTGAGACCCTTTAAC	1R	107.5
100044852|F|0--11:C>A	SNP	TGCAGTTTCGTCAGTTTTGTTTGTGATTTTGTTGCAGGATACTCAGGGCGAAGGTGCAGGAATTCGGCA	1R	107.5
100048552|F|0	SilicoDArT	TGCAGTCGCAAGTCGCCGCCTCCACGGCCGCGGCAAGACGCCCTGTTCCTGTCGAGGCCCTACTGCCCC	1R	107.5
100051670|F|0	SilicoDArT	TGCAGCAAGTACACACACACACACACACACAAAAACTACAGACTTCGCTGGAGCACCGAGATCGGAAGA	1R	107.5
100052759|F|0--63:T>A	SNP	TGCAGCACCAGCTTATGATGCACAGGTGAGAGTGACTTGGCATGAACACTGAGCATAACTTTCTTGCTG	1R	107.5
100054546|F|0	SilicoDArT	TGCAGCGATCGCTGCACCTCGCCGCTGCTCGCCATGGCGTCCGCCGACCTACCACTGCTTGTTCAGAGA	1R	107.5
100054546|F|0--10:G>T	SNP	TGCAGCGATCGCTGCACCTCGCCGCTGCTCGCCATGGCGTCCGCCGACCTACCACTGCTTGTTCAGAGA	1R	107.5
100055424|F|0	SilicoDArT	TGCAGCACCGTCGCCAGCAGCTTGTTGGGGTACTCCTTGAGGAGGCGCACCTGGAGGACGATCCAGAGG	1R	107.5
100057130|F|0	SilicoDArT	TGCAGTGCAGGCAGGCCGCAGGGTAGTACAAGGTTGCCGAGATCGGAAGAGCGGTTCAGCAGGAATGCC	1R	107.5
100061691|F|0	SilicoDArT	TGCAGGCATTGGCATTGGCGGACAACCGGCTCTCCGGAGCACTGCCGAGATCGGAAGAGCGGTTCAGCA	1R	107.5
100062911|F|0--26:A>C	SNP	TGCAGTTCATCCCCTAGGGCAAGCAAATATCGGGCGTATGTTACGGTACAGGTACAGGTATCACTTATC	1R	107.5
100063613|F|0	SilicoDArT	TGCAGATGGGTTATTTGGTGATTGCGGGTGGGACTTTAACGCGTGGTTGTTTGGAGAAAACGAAGTTAA	1R	107.5
100069915|F|0--40:A>C	SNP	TGCAGCGCGCGATGCCGCGACCTGCCGTCCTTCCGCTCCTACAAGAGCTCCACGCCGTCACAGCCGCCG	1R	107.5
100071033|F|0	SilicoDArT	TGCAGGAGCGTGGCAGCGACAGACGACGACTCAGGTTATGTCCCTTACACTTGCACCCCATCTTCTCCA	1R	107.5
100073540|F|0--61:C>G	SNP	TGCAGTCGAGCCTGTCGGTGGCCAAGAAGAGCCTGGCCCTGGACGAGACGCCGAGGATGTCCGACTCGT	1R	107.5
100075705|F|0	SilicoDArT	TGCAGCAGCACCGCAGCGGACGCACTTCTGCCTCTACCTCGTCTCCCTCCGCCTCGCCAAGCGCCGAGA	1R	107.5
100077852|F|0	SilicoDArT	TGCAGCCTCCCTCTCCTCCCAGCGGCCCACTTCTCTCCCAGGCCGAGATCGGAAGAGCGGTTCAGCAGG	1R	107.5
100078124|F|0	SilicoDArT	TGCAGTAAGCCGTCGTCGCCGTCATCCCATTCTGAGCCGCTTCGCCGAGATCGGAAGAGCGGTTCAGCA	1R	107.5
100078311|F|0	SilicoDArT	TGCAGCGGTGGCAGCAGCAGTTGGTTCTGAAAATCCGTGGAGTTTCTGACACTGTCGACGTGGCCGAGA	1R	107.5
100080312|F|0	SilicoDArT	TGCAGGATAGCCAAACCAGTTCGGGAACCAAATCAACTGGCACGATCAATCAATTCGAGAGTAAAAAAA	1R	107.5
100080461|F|0	SilicoDArT	TGCAGCCGCGGACGCCAAGAATTGCCTGAAGCAAATGTTGGGCAAGAAGGGGGAGGGCTCGCCGACGGC	1R	107.5
100080778|F|0	SilicoDArT	TGCAGTGCCGCCTCGCCTCGGGTCGCTGCTCCCGTCGGAGTTCATCCTTAAGCCGTCGGCCATATCAGC	1R	107.5
100081493|F|0	SilicoDArT	TGCAGGGCACGCAAAAACAAAGGCCCAAATTACAAGAGGGTGATCAATGCCGTTGCAAGTCTAGTACTA	1R	107.5
100083139|F|0	SilicoDArT	TGCAGCCCTTCTCCTTCCCCGAGTGGGACGAGCACCGCCGTCTGTCGACCGAGATCGGAAGAGCGGTTC	1R	107.5
100083289|F|0	SilicoDArT	TGCAGAGTTTCTTTTCTCAAGGGGGGCACGTACGACGCAGGCGTTGGTTTTCACGGACCGTGCCCATGA	1R	107.5
100089303|F|0	SilicoDArT	TGCAGCAAGTACACACACACACACACACACACAAAAACTACAGACTTCGCTGGAGCACCGAGATCGGAA	1R	107.5
100089368|F|0	SilicoDArT	TGCAGATCGGATAGGAGGGAGAGGAGCGGATGAGGAGATGCAGCGCTAGGACCGAGATCGGAAGAGCGG	1R	107.5
100096218|F|0--55:A>G	SNP	TGCAGCGCGGAACGGAGAGAGGGAGAGATATTAGTGAGGAGATGGGGAGAGAAGGAAGGAGGAGGGCGC	1R	107.5
100100722|F|0	SilicoDArT	TGCAGCCGCAGCAGGCTCATGTTCTTCACCAGCCCGCCGCCGCCGCCGCCATTGCCTCCACCGAGATCG	1R	107.5
100101443|F|0	SilicoDArT	TGCAGCAAAGGATATTTAGAGAAGGTGAGGTGTAGGGGTGGCGGATCCCGAGATCGGAAGAGCGGTTCA	1R	107.5
100104327|F|0	SilicoDArT	TGCAGGCGCCAGCGGTGCGAATCGGTGCTCGCAGCGCTGTATAGGAGGGAAAATCCTATTCGCCGCTCG	1R	107.5
100104327|F|0--25:T>C	SNP	TGCAGGCGCCAGCGGTGCGAATCGGTGCTCGCAGCGCTGTATAGGAGGGAAAATCCTATTCGCCGCTCG	1R	107.5
100107646|F|0	SilicoDArT	TGCAGAGCGCGCCGAGCGGATCCGCGGTGACCGCGCGCCGAGATCGGAAGAGCGGTTCAGCAGGAATGC	1R	107.5
100109956|F|0	SilicoDArT	TGCAGGTGGACCGTCGGCGACGCACAGGCCGCACCGCGTGGCTGCCATTTCTATTCACCGAGATCGGAA	1R	107.5
100113810|F|0	SilicoDArT	TGCAGCAGGGTTGTAGTTTGCCAAAAAAAAAGGACACCCCAACCGAGATCGGAAGAGCGGTTCAGCAGG	1R	107.5
100131511|F|0	SilicoDArT	TGCAGCTTCTCTAAAGCGCACGCGGGTGGGCCGAGATCGAAAGAGCGGTTCAGCAGGAATGCCGAGACC	1R	107.5
100144656|F|0	SilicoDArT	TGCAGCATAAACTCCTCCTCGTCGCCGCCTCCGAGATCGGAAGAGCAGTTCAGCAGGAATGCCGAGACC	1R	107.5
100144657|F|0	SilicoDArT	TGCAGCATAAACTCCTCCTCGTCGCCACCTCCGAGATCCGAAGAGCGGTTCAGCAGGAATGCCGAGACC	1R	107.5
100148152|F|0	SilicoDArT	TGCAGTGGTCACTGCTGGTGTTCAGGTTTTATTTTTACAAATTATTCGTTTATCATTATTATACCCAGA	1R	107.5
rPt-400866	DArT		1R	107.5
TC140079-1R	STS		1R	107.5
tcos152-1R	STS		1R	107.5
tcos164	STS		1R	107.5
tcos65	STS		1R	107.5
3343764|F|0--13:G>A	SNP	TGCAGAATTGGTTGGAGATGCACCCACCTTGTTGGTGTAGATGGTCCAGTTGGTGAAGAGCTCCGACAG	1R	107.5
4489659|F|0--18:G>A	SNP	TGCAGGCGCCAGCGGTGCGAATCGGTGCTCGCAGCGCTGTATAGGAGGGAAAATCCTATTCGCCGCTCG	1R	107.5
100005277|F|0	SilicoDArT	TGCAGCTGCATGCCAAGTTGCCAATGTTCTCGTCATTTCATCGTTCATTCTGCTGCCATAATCATGGAG	1R	107.5
100023702|F|0	SilicoDArT	TGCAGCTGGTGACATACATAATATCTAGTCGAAACTAAACTTACTCCTCAGATATAAACCACGGTCGAC	1R	107.5
100036566|F|0	SilicoDArT	TGCAGCGACCCCCCTTAGCCTCGCTGTCGCTCCCACCCGAGATCGGAAGAGCGGTTCAGCAGGAATGCC	1R	107.5
100012190|F|0	SilicoDArT	TGCAGATGAGACCCCATCCTCCTCCTCATCCCTGGTCCTTGTCCGCCCCTTCGATTTCAGGTTGGCAGC	1R	108.06
100030272|F|0--49:T>C	SNP	TGCAGACATTTGTTTTGAGATAGAGAAATCACTGCGGACTTTATGATGCTTACTAGCTGTGCGTGTTCT	1R	108.06
100037412|F|0	SilicoDArT	TGCAGGCGCCTATTGTACCTTGACCTACGCTCCCTCTCCTCTGCACACACAAGTCTCTTCCTCTCGCGT	1R	108.06
rPt-507414	DArT		1R	108.06
TC76051-1R	STS		1R	108.06
tcos137-1R	STS		1R	108.62
100016275|F|0	SilicoDArT	TGCAGTGAGAGTGCTTCATGTCTTCACACTTACAGTCTCACTTATTAGCTACACTGTCTTTGAGACTTG	1R	109.17
100002001|F|0--59:A>G	SNP	TGCAGTGGTACGGCACTAGCGCCAGTGTTTTCTCTGAATTCTTATCCAACCAATTAGCCACTGCAACAT	1R	109.73
100002577|F|0	SilicoDArT	TGCAGCGTCTGAGCAAAGGCCTGATATTTGCGAATATCAGCATCACTAACACTCCGAGATCGGAAGAGC	1R	109.73
100002814|F|0	SilicoDArT	TGCAGAGCATGATGATGAAAGACAGTTTCAGAAGCTATAGATGTTTAGCCATCGTTGCCCGTGTACATA	1R	109.73
100004547|F|0	SilicoDArT	TGCAGAGGGTACTGCCGTTTTCAATTCTTGACAAGCCGAGATCGGAAGAGCGGTTCAGCAGGAATGCCG	1R	109.73
100004965|F|0--27:T>C	SNP	TGCAGTTAACGCAAAACATTGCATGCATCACAGTGGTTATAATCCGCAAAGCGTTGGACAGGAAATTAT	1R	109.73
100007622|F|0	SilicoDArT	TGCAGACTTATTTTCCCTTTTGTTGGACCTAAGGATTACTACTACATTGCTAAACACCGAGATCGGAAG	1R	109.73
100014254|F|0	SilicoDArT	TGCAGAGTAGAAGCCCTGCTAAGTTGGGCTGGCCATCTAGTGCCATGCGTGGTGGCAATGAAATGTAGT	1R	109.73
100014804|F|0--8:A>C	SNP	TGCAGAGCAGCGCACACCTGAGCCGCCGCTTCGTCCTTGTCGCCGTCCAGCCTTCCCCTCAGGACCCGA	1R	109.73
100019836|F|0	SilicoDArT	TGCAGTATACAGTTGTTGGCCAGTGTTTGTTATTCCCATGAACCTCCCCCCTGGCGTCTGCATGAGATC	1R	109.73
100022846|F|0	SilicoDArT	TGCAGCCCATACCCCGAACTGGCAGCATTTCATTCAGTGTTGCTTTTCTTCTTTTTCACTTTAGCCAAT	1R	109.73
100024735|F|0	SilicoDArT	TGCAGCAAGAGCGAGCTGCTCCTCAGCTCCAACCCTGTGCACAAGAAGGTGCCGAGATCGGAAGAGCGG	1R	109.73
100029250|F|0--15:T>A	SNP	TGCAGTGATGCAGATTCTCTTTAGTAATGACTATGCAACAACACATGCAAGTTCAGGGATTCAAAATTT	1R	109.73
100037261|F|0--22:G>A	SNP	TGCAGCGCCAACAATCAGCAGAGCAACCAACAAGGTTGTAGCCGCTGTCACAGATGGCCTACCGACCGT	1R	109.73
100040350|F|0	SilicoDArT	TGCAGGTACGGGATTGATTCTCTTCCAGCTCGCGAAGCTACTGTATATGCCGAGCTCGAGATCAAGTTC	1R	109.73
100040508|F|0	SilicoDArT	TGCAGCACCTTTAAAACGTGCGAGGCTTTTATTGGTGACCGAAAAGGAGGCCGAGATCGGAAGAGCGGT	1R	109.73
100043114|F|0	SilicoDArT	TGCAGTAAGTCTCGGGTCAGGGAACTGGCGGTTAGTCGCACTGCGTGGAGGACATTGTTCCGAGATCGG	1R	109.73
100043114|F|0--31:T>C	SNP	TGCAGTAAGTCTCGGGTCAGGGAACTGGCGGTTAGTCGCACTGCGTGGAGGACATTGTTCCGAGATCGG	1R	109.73
100044824|F|0	SilicoDArT	TGCAGCAATGCAGAAACTTTAGGCGAGGATAGCTATCATCTCGCTGAACACAAAAGAAATGCTATCATC	1R	109.73
100049994|F|0--47:T>A	SNP	TGCAGAGACATCAGAGTTCAGTTGGACCTGAATCAGTTGATTTTTTTTAAAAAAAGGAGGTTGAAACCC	1R	109.73
100049994|F|0--48:A>T	SNP	TGCAGAGACATCAGAGTTCAGTTGGACCTGAATCAGTTGATTTTTTTTAAAAAAAGGAGGTTGAAACCC	1R	109.73
100050745|F|0	SilicoDArT	TGCAGTTGCGGCCTTGCAGTCCCCTCCCCTGCTTATCCCCTCCCGAGTCCGTCGCCTCCTCGGCATTCC	1R	109.73
100051768|F|0	SilicoDArT	TGCAGCCATAGTGTCTCCACCGTTGAACTTCACCCATGGACCTCGCTGGATTGGGCAGAGCGGGACCCG	1R	109.73
100053021|F|0	SilicoDArT	TGCAGCAGTACAGTACAGTACAGCTAGTCGTTGAGCATCTACTATTTCTTCCTTTCTCCTTGGCGTGAG	1R	109.73
100065626|F|0	SilicoDArT	TGCAGCAAAATCAACAAAGAAGCGGCAAATCAGCAGAAGATCATAGGTACCGAGATCGGAAGAGCGGTT	1R	109.73
100071950|F|0	SilicoDArT	TGCAGGGGAATCATCAACCACCACCGTCAGGTGCTCGTCCACGTCGAACACCCTGTGCATACGCGCGCT	1R	109.73
100106243|F|0--28:A>C	SNP	TGCAGCCCTTCTCCTTCCCCGAGTGGGAAGAGCACCGCCGTCTGTCGGCCGGGAAGACCCGCCGAGATC	1R	109.73
c3329_1202	SNPe		1R	109.73
c6945_2971	SNPe		1R	109.73
rPt-506649	DArT		1R	109.73
TOP1094	STS		1R	109.73
100147399|F|0--32:T>C	SNP	TGCAGTGGTACGGCACTAGCGCCAGTGTTTTCTCTGAATTCTTATCCAACCAATTAGCCACTGCAACAT	1R	109.73
3732140|F|0--64:A>G	SNP	TGCAGCGCCAACAATCAGCAGAGCAACCAACAAGGTTGTAGCCGCTGTCACAGATGGCCTACCGACCGT	1R	109.73
tcos1005	STS		1R	110.86
100004026|F|0--62:G>A	SNP	TGCAGCCACAATGTGCATCAGCCATATACTTGGGTGCATGCGGAATTTGATCGAATGAGAAGGAAATGA	1R	111.44
100005188|F|0	SilicoDArT	TGCAGCCTAGAAATTATCTGATCACTGACCTCCGCGCCCCCGAGATCGGAAGAGCGGTTCAGCAGGAAT	1R	111.44
100013741|F|0	SilicoDArT	TGCAGCTTCCTTCTCCACAGCTTTCCAAACACACTGCCGAGATCGGAAGAGCGGTTCAGCAGGAATGCC	1R	111.44
100014638|F|0	SilicoDArT	TGCAGCTTATGTTAAACTAAATATTGCTATACAACTTGTGCTCCAAGCCTGCAATACATACATGTCATT	1R	111.44
100014638|F|0--39:G>C	SNP	TGCAGCTTATGTTAAACTAAATATTGCTATACAACTTGTGCTCCAAGCCTGCAATACATACATGTCATT	1R	111.44
100015017|F|0	SilicoDArT	TGCAGCGACAGAGATGGCCTGCGCCTGCCTTTTCTTGAACTCGACCATCCTACTAACGTCCGAGATCGG	1R	111.44
100021613|F|0	SilicoDArT	TGCAGAAGAGAGGCCAGAATCTTCACCCAAGTGGGAGGAGGAAGAGAACTATTTGGCCTTCACCAACTC	1R	111.44
100021613|F|0--68:C>T	SNP	TGCAGAAGAGAGGCCAGAATCTTCACCCAAGTGGGAGGAGGAAGAGAACTATTTGGCCTTCACCAACTC	1R	111.44
100021732|F|0	SilicoDArT	TGCAGCGCATCCGTCCCTTCGAGCTTACTTCCACTTCCACACAAGAATCAAACAGAGAGCGCGCGGCGA	1R	111.44
100024556|F|0	SilicoDArT	TGCAGCAAGTACACACACACAAAAAATCTACAGACTTCGCCAGAGCACCAGGAGCACGGCAAAGACATA	1R	111.44
100033737|F|0	SilicoDArT	TGCAGCACCTTCAAAACGTGCGAGGCTTTTTATTGGTGACCGAAAAGGAGGCCGAGATCGGAAGAGCGG	1R	111.44
100034385|F|0	SilicoDArT	TGCAGGAACCCTGCTCTCCCGACCGCGTCCCTGTTTAAGCTTGCTCCCTCAATGCCGACTTCAACCGAG	1R	111.44
100037016|F|0	SilicoDArT	TGCAGCGCCACGAAAACAACAAACACATGAACAGGCAATCACATGAACACGCCGTGCCCTGGCCGAGAT	1R	111.44
100037958|F|0--19:T>C	SNP	TGCAGGCTTGCAGCTACCGTGAGGAAACTTTAGTCGATGCAATCCTAGCCCCACGAACATCCAAGCAGT	1R	111.44
100041555|F|0	SilicoDArT	TGCAGCAACTGCCGTTTCTTCTCTCTTTCCCCCCCGAATTTAGGGTAACCCTCCATGTTCGTGGCCTCC	1R	111.44
100041555|F|0--51:T>C	SNP	TGCAGCAACTGCCGTTTCTTCTCTCTTTCCCCCCCGAATTTAGGGTAACCCTCCATGTTCGTGGCCTCC	1R	111.44
100058672|F|0--65:C>G	SNP	TGCAGCACCTGGAGGTGGCCTTCGTCGAGTGCGGCCAAGGGAAGGATTACTTCGGCGGCGACAGCCTCG	1R	111.44
100062280|F|0	SilicoDArT	TGCAGCAGGCACCGCGAGCATGGAACGCCAAGCTTGACTCCACCATGCGGCAACTTGGGTTCGCAAGCT	1R	111.44
100069606|F|0	SilicoDArT	TGCAGGCAGATTGGTGAGCGTCCACGTGCCGTTCTCCTCGATAGATGCCAGCTCCTCCAGCATCGCGCT	1R	111.44
100070395|F|0--26:C>A	SNP	TGCAGGGCGCCAAGCAGTTGAAATCTCCCCCGTGTGAAGCGCGGGGTTCGTGAATCGGTTACCTCGGTT	1R	111.44
100141811|F|0	SilicoDArT	TGCAGGAGACGGTCCAGTATCCGAGATCGGAAGAGCAGTTCAGCAGGAATGCCGAGACCGATCTCGTAT	1R	111.44
3592336|F|0--7:A>G	SNP	TGCAGCGACAGAGATGGCCTGCGCCTGCCTTTTCTTGAACTCGACCATCCTACTAACGTCCGAGATCGG	1R	111.44
100070395|F|0	SilicoDArT	TGCAGGGCGCCAAGCAGTTGAAATCTCCCCCGTGTGAAGCGCGGGGTTCGTGAATCGGTTACCTCGGTT	1R	111.44
100006848|F|0	SilicoDArT	TGCAGTGGCAATGATCTAGAGTATGTTGTATTGCACGAATACGTATTTTAGCACCGAAATGACGCACAG	1R	112
100041036|F|0	SilicoDArT	TGCAGGGCAATTGGTCGACGCACGCCAAGATGATGGACGTCCATTTCTTTCTACACCGATAGGTTAGTA	1R	112
100048318|F|0--52:G>T	SNP	TGCAGATCAGCCACAAGATAACAGCATAGCAACAACATCACGAGGAAGAAGAGAGTCAAAGTGAAGAGC	1R	112
100070006|F|0--38:C>G	SNP	TGCAGAGCAGGGCCAATAAAGCGACGGAGGAAGTCGACCCAGAAAATATGTGTGTGTCGACCGATCGAT	1R	112
c20176_1167	SNPe		1R	112
CA498871-1R	STS		1R	112
rPt-7570	DArT		1R	112
100001036|F|0	SilicoDArT	TGCAGCACTGTTCCATCTTTTGTTCGTGTGTACTGGTCATGCTAACAAATAGGCACACGACAGCTTAAC	1R	112.55
100002960|F|0	SilicoDArT	TGCAGATAACTTTTGATCACATCGTACAGTAGCCAATTTTGACAAACAGTACAACCAATGCCTGAAAAT	1R	112.55
100004882|F|0	SilicoDArT	TGCAGTGAGCTGCCTCAACAACAAGAGACACCGCAACATGCCATGCCAATAACTCACGCCCTCATCCCC	1R	112.55
100006816|F|0	SilicoDArT	TGCAGGGTGCATGGAGAGGGAGGTGCTACTTCTGCCGCTGGGCACAGTGAACCGAGATCGGAAGAGCGG	1R	112.55
100008219|F|0	SilicoDArT	TGCAGGAATCCAGCCATGCCTTGCGCAAGTTAAGTTAAGCGCCCAACTTGCCGTCTTTAACAGTCAAAA	1R	112.55
100009307|F|0	SilicoDArT	TGCAGATACGCTTGTACTGTAGGAGTACAAAAGTGGCAAACAACTCAGAGCCGCCTGACCTGCATCGCT	1R	112.55
100022202|F|0	SilicoDArT	TGCAGACAAGGTGCAAATAACGACATTTTTATATCTCTTAGGGCCATCAACATGGCTGTTCCGTGGAAG	1R	112.55
100022202|F|0--28:T>C	SNP	TGCAGACAAGGTGCAAATAACGACATTTTTATATCTCTTAGGGCCATCAACATGGCTGTTCCGTGGAAG	1R	112.55
100028767|F|0	SilicoDArT	TGCAGCCTGTCGATGTTGTACGCGTTTGGTAGCTTGGTAGCCGAGATCGGAAGAGCGGTTCAGCAGGAA	1R	112.55
100029125|F|0	SilicoDArT	TGCAGCAAGCCGTACGTACACTCCCATGCGCGCACCTCTCCGCATCCGTTTCTTGGTTCTTACTAGCAC	1R	112.55
100029125|F|0--30:C>T	SNP	TGCAGCAAGCCGTACGTACACTCCCATGCGCGCACCTCTCCGCATCCGTTTCTTGGTTCTTACTAGCAC	1R	112.55
100059556|F|0--18:A>G	SNP	TGCAGCTTTTGGGCGTCCACAGCTCGTGAGGCGGAATGATTCCGCCACTGGTGCTGCTAATAAATGTGT	1R	112.55
100074816|F|0	SilicoDArT	TGCAGCGGCGCCGCGCACGCCAGAGCCGCGCCGTCGCCCGAGATCGGAAGAGCGGTTCAGCAGGAATGC	1R	112.55
100075467|F|0	SilicoDArT	TGCAGTCCCTTCCTCCGCGCCGTCCGCTCGTCGCCTGCATTCCGCCGCCGAGATCGGAAGAGCGGTTCA	1R	112.55
100003660|F|0	SilicoDArT	TGCAGGTAATATCTTTGACCACTGTAATTAAAATGCCTTCTTCAGTCAGTCAATCATAACTGCAATTAA	1R	113.11
100003660|F|0--58:A>G	SNP	TGCAGGTAATATCTTTGACCACTGTAATTAAAATGCCTTCTTCAGTCAGTCAATCATAACTGCAATTAA	1R	113.11
100007015|F|0	SilicoDArT	TGCAGTTCCTGTTGCCTAGGAAGAACAATCTGAGCCCCTTGACCTGACGAGGAGAAGTATCTATCCAGA	1R	113.11
100007458|F|0	SilicoDArT	TGCAGCATGTGGCTGCACACAGCTGCACATCAAATGCTAGATCGATCCATTGCTGGTACAGGCAGGGCA	1R	113.11
100008993|F|0	SilicoDArT	TGCAGCAGCCACAATGTTGTAGCACCTCCAGATGTGCACCGCCGCGCAGCCCCAACCAACCCCAATACA	1R	113.11
100011092|F|0	SilicoDArT	TGCAGGCCTTTCTGTTTCTATTTGGGGACTTGGTACAGTTTGCTTATGTTTTCTAAAAAGAACCGCTGA	1R	113.11
100012307|F|0	SilicoDArT	TGCAGCTAAATGCCAATGAACGGCGTAAAAGAAATACGGGACCTCCTACAAACAATCCTACTGGACTGC	1R	113.11
100027949|F|0	SilicoDArT	TGCAGGACAAATTAATAGCAAAACCAAGGCAAGATGCTGAAATTTAGGAAGGGGCGTATGCCTTTTCCC	1R	113.11
100037284|F|0--9:C>G	SNP	TGCAGAAGACGACCTGTCAAGGACCTTGATTCAAGGACTCACCTCATTGAGCACCAAAGAAGGAGGCCA	1R	113.11
100039122|F|0	SilicoDArT	TGCAGCCCTTCGGTATGGTGCCGCACACAATTATCCCTCTAACCTCGAGTTCTTTTCCAACTTCAGCGA	1R	113.11
100048461|F|0--29:A>G	SNP	TGCAGGGATTAAAAATCGGGGTACTACTTAAAAATAAAAATATACTGCTAGTATACTTCAGCAGGAGTA	1R	113.11
100059306|F|0	SilicoDArT	TGCAGATGCAGCAATGACAAACCCATCACGCGGAAGCCCTCTGGCAGGGCGAGATCGGCTTAAGTCCCG	1R	113.11
100059309|F|0	SilicoDArT	TGCAGATCTGGCGCGCCATCCCCGCCGCCACAGACGTCCCCGTGCGCTCCGCCACCCTGCTCCGAGATC	1R	113.11
100080965|F|0	SilicoDArT	TGCAGGACAAATTAATAGCAAAATCAAGGCAAGATGCTGAAATTTAGGGAGGGACGTATGCCTTTTCCC	1R	113.11
100025690|F|0	SilicoDArT	TGCAGATGCGCACATCAAATCCGTCAAGAATCATCAAACCTGTCCGTATGGGTACCGAGCTAGTCAGCC	1R	113.66
100034852|F|0	SilicoDArT	TGCAGCTCCTCTTCGTGATGTTGTAGGCTAGCGGGATGACCCCTACATGGCACATCCGCCAACAAGTAG	1R	113.66
100041268|F|0--64:T>G	SNP	TGCAGACGGAGGCGCAGAGCTTCGACGTGCCCAGCGCCGACATGATCTACAGCCTCGCCTACCTTCCGC	1R	113.66
100045783|F|0--20:G>A	SNP	TGCAGTCCTGCTTGCTGACTGGCGTGCACCTGTCTGTCACCGTGAGCGTGGCCCGAGATCGGAAGAGCG	1R	113.66
100045783|F|0--46:C>A	SNP	TGCAGTCCTGCTTGCTGACTGGCGTGCACCTGTCTGTCACCGTGAGCGTGGCCCGAGATCGGAAGAGCG	1R	113.66
100069766|F|0--31:A>C	SNP	TGCAGAACACGGCCCTCGCGATCATCGACCAAACCTACGCCGCCGCGCTCCAGACCGCCGAGATCGGAA	1R	113.66
c4500_701	SNPe		1R	113.66
rPt-506092	DArT	tgcagtttgacaataatattagttttaagaattaatgttgattacaaaatttattttgtttaatgcaattaattccatttccaaattatgattaatacaattaacatgtttccaaattgtttatgatgtgatgtatacatcattggagcaacgtagacgttggatatagatggttggataactcagataatttggattcactaagagcaagtataaaacgtcttatattatgggacggaaacataataccagagagtaatggcacttttgtaaccttgatgctgtgtaacaaactctattcaccttaattaattattaatggatgagagtggtgtgtatgcaacaaagtctactcttcttaacaattaattaatggatgaatcaaagtctatgtctccg…	1R	113.66
rPt-507063	DArT	gggcgattgggccctctagatgcatgctcgagcggccgccagtgtgatggatatctgcagaattcncccttganggatccagtgcagtttgacaataatattagttttaaGaattaatgttgattacaaaatttattttgtttaatgcaattaattccatttccaaattatgattaatacaattaacatgtttccaaattgTttatgatgtgatgtatacatcattggagcaacgtagacgttggatatagatggttggataactcagataatttggattcactaagagcaagtataaaacgtcttatattatgggacggacaaagtacaaaacataataccagagagtaatggcacttttgtaaccttgatgctgtgtaaaaaaaaggcagcaccagc…	1R	113.66
rPt-507504	DArT	tgggccctcctagatgcatgctccgaagcggccgccagtgnganggannnntgcagaanncgccctnganggatccagtgcagnnnNagtcggtcaaaataaagaacaatatcaggagggtttttgctcacgattttcttcacagaattgagaactttctggttgtagtgctggtctgaagatgaggatgaaaggccaggtgtatcaatcacttttactttgattccctcaaccataccaactacttcttgaacttttctggtgctgcattcaaaagcatcagtctctagcttgacatcatcaaaaattgaatttatagtagcactcttgccgaccccAgttttaccaagaaccaatatggtgcatgacaaatcaagaggctcatttccagcagcttca…	1R	113.66
tcos114-1R	STS		1R	113.66
100003779|F|0--35:A>G	SNP	TGCAGCAGAGTAAATGGCACGAGCAAGAACTCGCCATGCCATTGACATGGCAATAGCTTCGACTCCGCA	1R	114.22
100003779|F|0--54:A>G	SNP	TGCAGCAGAGTAAATGGCACGAGCAAGAACTCGCCATGCCATTGACATGGCAATAGCTTCGACTCCGCA	1R	114.22
100004196|F|0	SilicoDArT	TGCAGCAAAAGTTCTTGCTGGTTCTAGCAAATTTTATTGCCGAGATCGGAAGAGCGGTTCAGCAGGAAT	1R	114.22
100006289|F|0	SilicoDArT	TGCAGTAAAAATTTCGTTGATGCTTGGATGTTGGGTAGACATCTTGTTAGTCGGCACATGATGGATGCC	1R	114.22
100006409|F|0	SilicoDArT	TGCAGGGTCAGTCTCTATAACCTTGAATTCCACACTTGTCATCCCAGCTCTCACAAGGAAAAGGTCTCC	1R	114.22
100006438|F|0	SilicoDArT	TGCAGAAAACACTAGTGTGAGCGACAGGAATGAGCACAAAGGGAAGAAGAAGAAGATATAGGGGCCAAT	1R	114.22
100006438|F|0--15:T>C	SNP	TGCAGAAAACACTAGTGTGAGCGACAGGAATGAGCACAAAGGGAAGAAGAAGAAGATATAGGGGCCAAT	1R	114.22
100007992|F|0	SilicoDArT	TGCAGGAGCCACAGCTAACTGCTTGTGATACATTTGATGTGTATGCGAAACCATTTTCGCTATGATACA	1R	114.22
100009556|F|0	SilicoDArT	TGCAGAACCTATCAACTTCTGCACCCAGTTAATAAATAACAGTGTTGAGATAATTAGCGTCACAATAAT	1R	114.22
100010774|F|0	SilicoDArT	TGCAGGTGTGCAAGGCGCAGCAACATCCTCAAGCAGAGTAGCACGGGGCATGCAAGGGCGCCGAGATCG	1R	114.22
100010774|F|0--6:T>C	SNP	TGCAGGTGTGCAAGGCGCAGCAACATCCTCAAGCAGAGTAGCACGGGGCATGCAAGGGCGCCGAGATCG	1R	114.22
100011010|F|0	SilicoDArT	TGCAGAAGATTACTAGTTGCATTTAAAGCCACCCTGATGCAGATGATTACTGAATTTTTTTTCCCCGAG	1R	114.22
100011751|F|0	SilicoDArT	TGCAGCCTTTTCCACTGGCCCACTAGTTCAAGCGTTTTCATCGCTCAATGGATGTAACCTCGCCGAGAT	1R	114.22
100012267|F|0	SilicoDArT	TGCAGGGAGCTGTACGGATACTCCTCAAGACTTGCAGAGCTACTGACCAAACAGCTAAATTCAGCAACG	1R	114.22
100012622|F|0	SilicoDArT	TGCAGGCATCGGCCTCAGATTTGTAGTATCCCACCGAGCGAAGGGCGACCTGAGATCAACGGCGATTCG	1R	114.22
100012696|F|0--49:A>T	SNP	TGCAGCACTGGATGGATACAGCCGCGCACGCAGCCAAGACCGATCAAGCAGACCGACCGAGATCGGAAG	1R	114.22
100014570|F|0	SilicoDArT	TGCAGCTGCATGATTCGGTCGCGTTGAGCGCACGCGCTACCCGATAAGGACGCTAGGAACTGACCGCTT	1R	114.22
100014739|F|0	SilicoDArT	TGCAGCATCGACGAGATCTGCCGCATTCTCGCCAGCCAAGATCAAAGACCCCGAGATCGGAAGAGCGGT	1R	114.22
100015339|F|0	SilicoDArT	TGCAGGCCTGCCTGAGGGCATAGGAGGCCCACCAAGTACCTGACGATAGGAAGGAGCCTGGAGAAAGGG	1R	114.22
100015339|F|0--7:C>T	SNP	TGCAGGCCTGCCTGAGGGCATAGGAGGCCCACCAAGTACCTGACGATAGGAAGGAGCCTGGAGAAAGGG	1R	114.22
100017245|F|0	SilicoDArT	TGCAGCTTCGACCTTTGTGCGACTCGTGGACAGCTTCCTTTGATCAGCAAACCGAGATCGGAAGAGCGG	1R	114.22
100017311|F|0	SilicoDArT	TGCAGCAAGAAAAGCTCGATGGTCCCCTACTTCGGTAGGGAGAGAAACGTAGTACGTGAGTTCGGGGCT	1R	114.22
100022005|F|0--65:T>G	SNP	TGCAGGCCATCGAGGCATGTCTCCTGGTTGGTCAGGATCGCCGAGAGCAACGTCTGCACGTCGTCTGCC	1R	114.22
100022256|F|0	SilicoDArT	TGCAGCTCCATTCTACCGTGGCAGTCCTCTGCCTCGTCTTCGTGGTTTCCTGCATCTTCCTCGTTGCTA	1R	114.22
100022593|F|0--8:G>C	SNP	TGCAGCGCGGCCTGGTCGGGGGCGTACAGCCGCATGGAGTTGATGCCGTTGGACTTGAACATGCTGACG	1R	114.22
100025726|F|0--14:A>G	SNP	TGCAGACAAGCCTGACCAGGTTGATGCCCTTACGAGAGTTCTCTTTTCCTGGTTTCTCTGTGCAAACAT	1R	114.22
100025726|F|0--6:C>G	SNP	TGCAGACAAGCCTGACCAGGTTGATGCCCTTACGAGAGTTCTCTTTTCCTGGTTTCTCTGTGCAAACAT	1R	114.22
100026223|F|0	SilicoDArT	TGCAGAAATAAGTTCATGGGATCACCTATTTAGTTATGTACGATGGGTCTTGCTAACGCCGAGATCGGA	1R	114.22
100026704|F|0	SilicoDArT	TGCAGTGGTGACTGTAAGCGAAGCACACGACTGCTTGTCCTTCCCCAATAATGCGCGGCATCGCCTCCG	1R	114.22
100027192|F|0	SilicoDArT	TGCAGCAGCAGTGATGCGCGTGCTGCAAACACGCTGCCGAGATCGGAAGAGCGGTTCAGCAGGAATGCC	1R	114.22
100027853|F|0	SilicoDArT	TGCAGGTCAGCCACGCCCAGTGCCCTCCTCCTCCATTCCCTCTCCCTCTCCTCACTAATCTCGCTCTTT	1R	114.22
100028430|F|0	SilicoDArT	TGCAGCCGACAGAACGAATGTCAGTCAAACGCGTTTGTAAAATCAGATGGCCTCCATGACATTGTCTGA	1R	114.22
100028545|F|0	SilicoDArT	TGCAGAGGGACATCACCGTCAAATCTTGGCGACCCAGCTCTTTGATGAAGTAGGCTACCAGTGAGTTGG	1R	114.22
100028881|F|0	SilicoDArT	TGCAGTTCACCTAATTGCTCATGTTTAACCTAAATTTCTTTTTGTTCATGTTTAATTTATCGGATCCTG	1R	114.22
100029787|F|0	SilicoDArT	TGCAGGTCCCTGTGGTTGCTCTCCATGCTTATATACGCACACAAACTCTGACTCTGAGGCTTCTTCGAG	1R	114.22
100030618|F|0--21:C>T	SNP	TGCAGGGTCCAGCTCCTGAAGCATGGCCATCAGCTTCGGGTCCCGAGATCGGAAGAGCGGTTCAGCAGG	1R	114.22
100031243|F|0	SilicoDArT	TGCAGTGTCCCGCTGGGGGAGAGACTAACCTCTGGCTCTTTCACCTTCACCGCAGACAGGGAGGCAGGG	1R	114.22
100031243|F|0--57:A>G	SNP	TGCAGTGTCCCGCTGGGGGAGAGACTAACCTCTGGCTCTTTCACCTTCACCGCAGACAGGGAGGCAGGG	1R	114.22
100032231|F|0--68:C>G	SNP	TGCAGAAACGGACGAAACAACTTGGCAAATGCCAACAAATTAGACGAGTCAGCGATCTCGCTTACCATC	1R	114.22
100033349|F|0	SilicoDArT	TGCAGCGCATCCACCTTGTTTGAATTCTACTCATGCTTGTGCGTTCTCTGACTCTCTGTTCCCAATTTT	1R	114.22
100033374|F|0	SilicoDArT	TGCAGTTTGGTGTAGTCCTAATTTTTCCGCAATGAGAATTTAATGCATTATTTCCTGCTCTCTCGGGTG	1R	114.22
100033947|F|0	SilicoDArT	TGCAGGTTGGTTTCAACAATGGAGTCCCCATCACCGAGGAGTTCTACAGCGCCAACATCAGCGGATGGC	1R	114.22
100034086|F|0	SilicoDArT	TGCAGTCAAGAGGAGCATGCATAAGCATGCATGCATCCGTTGACGAAATCGATCCGAGATCGGAAGAGC	1R	114.22
100034344|F|0--12:A>G	SNP	TGCAGGGTGATCACGTACGCATGTCGGGTATAAAGCGTGCAAGCCGCAAGTTTAGTGAATCGATTCCAC	1R	114.22
100035461|F|0--35:A>G	SNP	TGCAGCAGCAGATAGGAAGACGCAGGTAGCAAGCAAGCAGCACATAGCAAATCAGACAGCAATAGCTAG	1R	114.22
100037855|F|0	SilicoDArT	TGCAGGAACAACGACAAGAATCACACTCTTCAGCACACAAATGAAATTGTACTAATTTTGTGTCAGCCA	1R	114.22
100038507|F|0	SilicoDArT	TGCAGATTTGGGAGCAGTTTTTGATGTAGATCAGAATCAATTAGATAGAGAATTAGCAACTAGTGATAC	1R	114.22
100041365|F|0	SilicoDArT	TGCAGTCAGCAGTATGCCTACATCCCTCAGCACCTGCTCGCGCCGAGATCGGAAGAGCGGTTCAGCAGG	1R	114.22
100041822|F|0	SilicoDArT	TGCAGCGGCGCATACTCGGCCAAGGCGAGCCGTTGTTGTCATGCGGCGTACGAATGCTGAGAACGGAAG	1R	114.22
100042927|F|0	SilicoDArT	TGCAGCAACCAACCAACAACAGTTCAGCATTAGCATCGTCGTCGATGTTGCCAACAGCCCAACACGCTG	1R	114.22
100043151|F|0	SilicoDArT	TGCAGCCAAACTGTGTAGCGTGTGTCCAGTCGTCTGGAACAGTGGAGAGGAAATTAAAAGGCCTCGGAG	1R	114.22
100045132|F|0	SilicoDArT	TGCAGCAGAGATTCGTGCCACCGCATGAGAATCAATCACAAGTTCGAAGGGAACAGTGCGCGCAGATTT	1R	114.22
100045132|F|0--42:T>C	SNP	TGCAGCAGAGATTCGTGCCACCGCATGAGAATCAATCACAAGTTCGAAGGGAACAGTGCGCGCAGATTT	1R	114.22
100046875|F|0--65:C>T	SNP	TGCAGATCACCTTCAGCTCCTCCCAGAAGTCGGCGTCTCTAGCCGCCGCCACGCCGTCAGCAGCGCTGT	1R	114.22
100047221|F|0	SilicoDArT	TGCAGAATCATTGGTTGATTTGGGGCACCTTGGGTGGGGCGATGTGATGCTAGCTGCTGCCTGGCATGA	1R	114.22
100049289|F|0	SilicoDArT	TGCAGCATGCAATAGGCTGTAAGTTGGCCTCTTGTAATGGGCGTTGCTGCTGTGGCAGTCATTGGATTC	1R	114.22
100050159|F|0	SilicoDArT	TGCAGCCGAGATGCTGGAACCAGTATCAAGCAGTGCTAGAAATAGCCGCCGAGATCGGAAGAGCGGTTC	1R	114.22
100050159|F|0--46:C>G	SNP	TGCAGCCGAGATGCTGGAACCAGTATCAAGCAGTGCTAGAAATAGCCGCCGAGATCGGAAGAGCGGTTC	1R	114.22
100052391|F|0--29:T>C	SNP	TGCAGCCACCGCCGCCGCTCCATCCCCTCTAACCGCGGCACGAGAATCCACCGACCAAACACACCGAGC	1R	114.22
100053117|F|0	SilicoDArT	TGCAGCGGGTACCGAAGAGAGAACGGGTCTTCGGTCATCCTGGGGACTAGATTAATTAGTACTGGCTTA	1R	114.22
100054694|F|0	SilicoDArT	TGCAGCAGCAGCAGTGATGCGCGTGCTGCAAACACGCTGCCGAGATCGGAAGAGCGGTTCAGCAGGAAT	1R	114.22
100055166|F|0	SilicoDArT	TGCAGCAGTAGCCAACCTCGGCCTCGGCTACCACCCCGAGATCGGAAGAGCGGTTCAGCAGGAATGCCG	1R	114.22
100055351|F|0--35:A>G	SNP	TGCAGTAACACGATGTTGGGCTTGACAACCCTTTCAAGGTCGCATCCGAGGAGATTGGGGCTGCGCTTG	1R	114.22
100059914|F|0	SilicoDArT	TGCAGCGCATCCACCTTGTTTGAATTCTACTCATGCTTGTGCGTCTCTGACTCTCTGTTCCCAATTTTT	1R	114.22
100064771|F|0--16:G>T	SNP	TGCAGCAGCCAGCAGCGACGAAGGCGAGAACAATCTAGGCTAGCACCGCGGCGGCCTGCTTGTCGACCA	1R	114.22
100064771|F|0--8:C>G	SNP	TGCAGCAGCCAGCAGCGACGAAGGCGAGAACAATCTAGGCTAGCACCGCGGCGGCCTGCTTGTCGACCA	1R	114.22
100073027|F|0--32:A>G	SNP	TGCAGCCCTTGGTGGTTTCGACGGTGCACAGGATGTCGAGGGCATCGTCGCTCCGAGATCGGAAGAGCG	1R	114.22
100076122|F|0	SilicoDArT	TGCAGCAGCGACGACAGCTGCCGCATTCTCGCTATCACAAAGAAACAACCCAAAAGAGTTTCTTCTCTC	1R	114.22
100076122|F|0--27:C>A	SNP	TGCAGCAGCGACGACAGCTGCCGCATTCTCGCTATCACAAAGAAACAACCCAAAAGAGTTTCTTCTCTC	1R	114.22
100077244|F|0	SilicoDArT	TGCAGGCCGTGCTCGTCTCCCCCGCCGCGCTGGCCACCGAGATCGGAAGAGCGGTTCAGCAGGAATGCC	1R	114.22
100077245|F|0--13:A>G	SNP	TGCAGGCCGCGTCAGGGTCGTGGTCCGACCGTGGCGGCGGCCTCGCCGAGCCGATCTCCAACGGCACGA	1R	114.22
100078896|F|0	SilicoDArT	TGCAGATGCGCGGCGTGTCGATCGCTTGCGTGGCGAGCATCACCAGGGTTCGATTTGCTTTTGAGCCTA	1R	114.22
100078988|F|0--54:T>A	SNP	TGCAGAACGGAATGTGGCATCAAATCGGTGGTGGTGGTTATGAGTTGACCGTGCTTGCTATGGCTAGCT	1R	114.22
100083567|F|0	SilicoDArT	TGCAGGTCGTGGACGTCGAGGGCATCTCGGGGGACACGCTCCCTCTGCCCAAGGTTGTCGGAGGCAGCC	1R	114.22
100083857|F|0--6:C>G	SNP	TGCAGCCTGCCGCCCCTCTCGCCGCTGTCGCCGTACCCGCACTTCGCCTTCCCGCAGCTCTCGGTCGTC	1R	114.22
100087117|F|0	SilicoDArT	TGCAGTGTCGACGCGCGTCGTGCATGCAAGCCTGTGGTGGGACGACACGTGGTAGCTCGCATGGGCACC	1R	114.22
100090350|F|0	SilicoDArT	TGCAGCTCGGCCAGCTCGGCGAGCAGCGCCGCGTCGGCTGACGACTTGGACATGTCACCGAGATCGGAA	1R	114.22
100096222|F|0	SilicoDArT	TGCAGCGCGCCAGCGTCGCTGCCGCGGCAGCAGCAGTTTACTACCGCGTGCCATGTCGTATTAAACCGC	1R	114.22
100100072|F|0	SilicoDArT	TGCAGCTGCATCTGCATCAGGAGAGGTCCATCCGAGATCGGAAGAACGGTTCAGCAGGAATGCCGAGAC	1R	114.22
100104038|F|0	SilicoDArT	TGCAGGGCGCAGGCGTGGGGTTGGTGATGAAGAGTGACAACACCGAGATCGGAAGAGCGGTTCAGCAGG	1R	114.22
100104038|F|0--6:G>T	SNP	TGCAGGGCGCAGGCGTGGGGTTGGTGATGAAGAGTGACAACACCGAGATCGGAAGAGCGGTTCAGCAGG	1R	114.22
100108236|F|0	SilicoDArT	TGCAGAAATAAGTTCATGGGATCACCTATTTAGTTATGTACGACGGGTCTTACTAACGCCGAGATCGGA	1R	114.22
100119326|F|0	SilicoDArT	TGCAGGCGATGGGGCGGGCGACTCTAGCCAGCTCCTGTCCGAGATCGGAAGAGCGGTTCAGCAGGAATG	1R	114.22
100121644|F|0	SilicoDArT	TGCAGCGGGGACCCGACCATGTTTGAGGCCTTCTGGAGGGAGACCGAGATCGGAAGAGCAGTTCAGCAG	1R	114.22
100123656|F|0	SilicoDArT	TGCAGCACTATAATGAAAGACCAATAGCCCCGAGATCGAAAGAGCGGTTCAGCAGGAATGCCGAGACCG	1R	114.22
100141781|F|0	SilicoDArT	TGCAGGAGATGCGAGATGTTTGTCCCGTCCCTGAGCCTGAGCATGCCGAGCCCCGAGCGTGCGTGCGCG	1R	114.22
100141851|F|0	SilicoDArT	TGCAGGACGTGGATGGTCGACCCTGACCCGCCGAAATCGGAAGAGCGGTTCAGCAGGAATGCCGAGACC	1R	114.22
100142572|F|0	SilicoDArT	TGCAGCTGCATCTGCATCAGGAGAGGTCCATCCGAGATCGGAAGAGCGGATCAGCAGGAATGCCGAGAC	1R	114.22
100147203|F|0	SilicoDArT	TGCAGCAGCCTTGCGCGCGCCGTCTAGCTGTAGTAGTATAGTCCCGTTTAGATCAAAAAAATGAAATCT	1R	114.22
c313_2926	SNPe		1R	114.22
c5456_857	SNPe		1R	114.22
c74941-2(mTERF)-1RL	SNPe		1R	114.22
rPt-400773	DArT		1R	114.22
rPt-410989	DArT		1R	114.22
rPt-505686	DArT		1R	114.22
rPt-509169	DArT		1R	114.22
rPt-509189	DArT	TGCAGCCAACACCGGCTGCCTCTCCCACAACCGGCTGCTGCAGCTGACCGTCTGACCGATCACGCTCTTCCCCTCTCTCTCTTTTTTTGTCCCTGCGGTGAC	1R	114.22
rPt-6128	DArT		1R	114.22
tcos202-1R	STS		1R	114.22
tcos26-1R	STS		1R	114.22
tcos53-1R	STS		1R	114.22
tcos93-1R	STS		1R	114.22
TOP1088	STS		1R	114.22
Xscm21-1R	STS		1R	114.22
3343662|F|0--8:G>A	SNP	TGCAGGGAGCTGTACGGATACTCCTCAAGACTTGCAGAGCTACTGACCAAACAGCTAAATTCAGCAACG	1R	114.22
100006117|F|0	SilicoDArT	TGCAGTGCTTTCCCACCACCATCAGGCTGGGAGTCGACCATTTGAACAGGCACACCGAGATCGGAAGAG	1R	114.78
100006117|F|0--28:G>C	SNP	TGCAGTGCTTTCCCACCACCATCAGGCTGGGAGTCGACCATTTGAACAGGCACACCGAGATCGGAAGAG	1R	114.78
100015504|F|0	SilicoDArT	TGCAGAGAAGCCATGAGCGCCATCATCTTGAAGTTGGAGCACGTGTGTGGAATAGCCACGTAGAAGATC	1R	114.78
100015504|F|0--47:T>C	SNP	TGCAGAGAAGCCATGAGCGCCATCATCTTGAAGTTGGAGCACGTGTGTGGAATAGCCACGTAGAAGATC	1R	114.78
100022706|F|0	SilicoDArT	TGCAGCATTTTAACTTTTAAGGAAACGATATTTCGTAGCTGGATGCACTGAGCTCCGCTGACACCCCGA	1R	114.78
100024332|F|0	SilicoDArT	TGCAGGCAATTCATTGATGATTTCAACCTTAAATTTGTTCTCAGCGAAAAACTCAAGGGCTTCATCCCT	1R	114.78
100033255|F|0	SilicoDArT	TGCAGCCAAGGCTGCAAGAACTCAAACCCGCAGCAAGCGCGTCGGCAAGTGGGCGATGCTGCTCCGAGA	1R	114.78
100041018|F|0	SilicoDArT	TGCAGTTTATGCACGTGGGCGTCAAATAGGATTTGTCGTTATACAGGAGGTCCCCTCAACTCCAACGAC	1R	114.78
100062082|F|0	SilicoDArT	TGCAGCCTCCCCGTCCCGAAGGAAGGTCGTCTCGTCCCACCGCTGGGTCACCGACGAGAACACATGCAT	1R	114.78
100066292|F|0	SilicoDArT	TGCAGTTTCGAAGAGCGGTGGTGCGGCCGCGAGCATTCGCGCGCTGGCGTCGCACACCTGGCACAAGGC	1R	114.78
100066292|F|0--6:T>A	SNP	TGCAGTTTCGAAGAGCGGTGGTGCGGCCGCGAGCATTCGCGCGCTGGCGTCGCACACCTGGCACAAGGC	1R	114.78
100075160|F|0--16:G>C	SNP	TGCAGGACCCCACGGGGGCCCTCGCCGACTGGAACGCCTCCGATGCCGACCCCTGCTCCTGGAACGGCG	1R	114.78
100084384|F|0	SilicoDArT	TGCAGGGCGTGGCGCGACACCGTCGACGCCCGCCTGCACGGCCACCTGCTCTCGCGCTCCGTACGCGGC	1R	114.78
100092692|F|0	SilicoDArT	TGCAGCTCCCTCTGCAATGTCACCTTGGCGTCGACGGCCTCGGCCAGTTCCTCCATCTCGCCGTCCGAG	1R	114.78
100092692|F|0--50:C>G	SNP	TGCAGCTCCCTCTGCAATGTCACCTTGGCGTCGACGGCCTCGGCCAGTTCCTCCATCTCGCCGTCCGAG	1R	114.78
100116337|F|0	SilicoDArT	TGCAGTTCCCTCTGCAATGTCACCTTGGCGTCGACGGCCTCGGCCAGTTCGTCCATCTCGCCGTCCGAG	1R	114.78
100116337|F|0--5:T>C	SNP	TGCAGTTCCCTCTGCAATGTCACCTTGGCGTCGACGGCCTCGGCCAGTTCGTCCATCTCGCCGTCCGAG	1R	114.78
c16292_1378	SNPe		1R	114.78
rPt-505196	DArT	TGCAGGAATGATATAAAAAATGATTAAATAATGGAAGAAATAAAATTGTAAGCTGCTAACTGGAAATTAAAATTGTTGAAACTAGCAACTCAAGGGATATCATTAAGCCTTACCTGTTGGAATCTTCTAACACGTGTCAAGCCTGAAAGTGCTCCACTAGCCTCGTTTCTGTGAAGAACTCCAAAATCAGCAATGCGCAGTGGCAACTCTGTAGCATATTCAATCAGGAATTCAGGATTAATAACGAAGGAGTAAATATACAGCATAATTAAAATTAGAGAAGGAGCTCACCTTTGTAAGAACGAGTCTCGTGCTTAAATATTATGCAATGCCCAGGGCAATTCATTGGCTTAAGACCAAACTCCTCTCCATTGATCTGCACAATAATAAAACAAATAA…	1R	114.78
tcos33-1R	STS		1R	114.78
5035086|F|0--5:T>C	SNP	TGCAGTTTATGCACGTGGGCGTCAAATAGGATTTGTCGTTATACAGGAGGTCCCCTCAACTCCAACGAC	1R	114.78
100084384|F|0--37:A>G	SNP	TGCAGGGCGTGGCGCGACACCGTCGACGCCCGCCTGCACGGCCACCTGCTCTCGCGCTCCGTACGCGGC	1R	114.78
100014633|F|0	SilicoDArT	TGCAGACACATCTCTGGAGAAACAGTAGAAGGACACACACAGGCACAAGACGTTCGTGACAAGAGACAA	1R	115.33
100014633|F|0--44:A>G	SNP	TGCAGACACATCTCTGGAGAAACAGTAGAAGGACACACACAGGCACAAGACGTTCGTGACAAGAGACAA	1R	115.33
100020145|F|0	SilicoDArT	TGCAGATGATCAAATAGTTCTCCAACTCTCCAATTTACCGAATAATAAGAGGGAGGACACACAGATTAA	1R	115.33
100020732|F|0	SilicoDArT	TGCAGAATCCTGTCCCCCAGATCCGAACTCGCACTCGATCGAGGACCCAAATTCCGAGATCGGAAGAGC	1R	115.33
100034326|F|0	SilicoDArT	TGCAGACGATGATTGGGGGATCATTCTGACAGCTAGGAATATCCTGCGTTAGACGTGGACGGGCTGATT	1R	115.33
100035683|F|0	SilicoDArT	TGCAGGAGGGATCTATGGATTATTGTGGTCCTAATCCCACACAATGTGTTTGATGTAAGCACAAAGAGA	1R	115.33
100064561|F|0	SilicoDArT	TGCAGCCTCCCCTTCCCGAAGGAAGGTCGTCTCGTCCCACCGCTGGGTCCCCGACGAGAACACATGCAT	1R	115.33
c8211_592	SNPe		1R	115.33
100001872|F|0	SilicoDArT	TGCAGCTATGTTCTTAGCTCCGCCACTCCATCCCCCTTTTACACTACAAACCCTACGCAAAATACTACC	1R	115.89
100001872|F|0--22:C>T	SNP	TGCAGCTATGTTCTTAGCTCCGCCACTCCATCCCCCTTTTACACTACAAACCCTACGCAAAATACTACC	1R	115.89
100005087|F|0	SilicoDArT	TGCAGTGACTGTCAAATAATACCACTACTAAATAAATCTGGCCACCTTTTCTGATGACCCCTCATAGGA	1R	115.89
100005243|F|0	SilicoDArT	TGCAGCTCTATTCTTAGCTCCGCCACTCCATCCCCTTTTACAGTACAAACCCTACGCAAAATACTACCG	1R	115.89
100008185|F|0	SilicoDArT	TGCAGCGAATGGGAATCATGCGCACAACCTACTGCTAAGTTAGTCACAAAGTTAATCACCGAGATCGGA	1R	115.89
100011888|F|0	SilicoDArT	TGCAGTGACTGTCAAATAATACCACTACTAAATAAATTTGGCCACCTTTTCTGATGACCCTCATATGAG	1R	115.89
100012693|F|0	SilicoDArT	TGCAGCTCCATGTGCCTTGTAGCTCAAATCCCCAGCTTAACACTCTCGTGTCTCCTTAATATCAGTATT	1R	115.89
100030994|F|0	SilicoDArT	TGCAGTAGCCACAGACTAGCAGGGCGATGCAGGCGACGATGATGTAGAGCTTCCCCTTCTGCTGCTGCG	1R	115.89
100030994|F|0--16:T>A	SNP	TGCAGTAGCCACAGACTAGCAGGGCGATGCAGGCGACGATGATGTAGAGCTTCCCCTTCTGCTGCTGCG	1R	115.89
100031279|F|0	SilicoDArT	TGCAGATTTAATCGAAAGCGTCAGCTCTACCATCTCCTCGCCGATCGTTAGATCAGTATCAAATCCACT	1R	115.89
100053820|F|0	SilicoDArT	TGCAGCTCCAGTGCACCCAGGCATCTGTGGACGGAAGAGTAAGTAGTAATGCATAAATAGCAGCGGTAA	1R	115.89
100053820|F|0--19:G>A	SNP	TGCAGCTCCAGTGCACCCAGGCATCTGTGGACGGAAGAGTAAGTAGTAATGCATAAATAGCAGCGGTAA	1R	115.89
100057502|F|0	SilicoDArT	TGCAGCTCCATGTGCCTTGTAGCTCAAATCCGCAGTTTTGCACTCTCGTGTCTCCTTAATATTGGTATT	1R	115.89
100120317|F|0	SilicoDArT	TGCAGGAAGAATTGGGGATGATTATAAAGTTCCGAGATCGGAAAAGCGGTTCAGCAGGAATGCCGAGAC	1R	115.89
100131243|F|0	SilicoDArT	TGCAGGAAGAATTGGGGATGATTATAAAGTTCCGAAATCGGAAGAGCGGTTCAGCAGGAATGCCGAGAC	1R	115.89
3360570|F|0--34:G>C	SNP	TGCAGTAGCCACAGACTAGCAGGGCGATGCAGGCGACGATGATGTAGAGCTTCCCCTTCTGCTGCTGCG	1R	115.89
100010386|F|0	SilicoDArT	TGCAGGAACAAATCCAGAAATCATTGGCATAGAACGCAAACAAATGGGCCAGATATAATGGAGAGAACG	1R	116.45
100022117|F|0	SilicoDArT	TGCAGGTAGGTAGTCCCGCATGCGTACCGTGTTGCTACTACCCCTACTTGCCAGTGCCAGCCAAGCCGC	1R	116.45
100022117|F|0--41:C>T	SNP	TGCAGGTAGGTAGTCCCGCATGCGTACCGTGTTGCTACTACCCCTACTTGCCAGTGCCAGCCAAGCCGC	1R	116.45
100022117|F|0--43:C>T	SNP	TGCAGGTAGGTAGTCCCGCATGCGTACCGTGTTGCTACTACCCCTACTTGCCAGTGCCAGCCAAGCCGC	1R	116.45
100054894|F|0	SilicoDArT	TGCAGGTAGGTAGTCCCCGCGTGCATCCTGTGTTGCTACTTGCTAGTGCCAGCCAAGCCGCAAGCCGCA	1R	116.45
100005010|F|0	SilicoDArT	TGCAGATTGTGCAGATTCATATGAATAGAAATGAGGAAGTTGCTAAATTCATATCCCCATGATATCAGC	1R	117.59
100007097|F|0	SilicoDArT	TGCAGTCTGCACGAGCACATTCGAAACAACTCGTAGTCAAAGACTTCCGCTGTCCTCCGAGATCGGAAG	1R	117.59
100007097|F|0--14:G>A	SNP	TGCAGTCTGCACGAGCACATTCGAAACAACTCGTAGTCAAAGACTTCCGCTGTCCTCCGAGATCGGAAG	1R	117.59
100007802|F|0	SilicoDArT	TGCAGTGCCAGAGCCCAGCTCATGAGGCTTCGGTCCCGAGATCGGAAGAGCGGTTCAGCAGGAATGCCG	1R	117.59
100016601|F|0	SilicoDArT	TGCAGAAGGTTGGTTGGAGGCTTTTCGTTGGGCCTCTGTTTACTTATCGAGGCCGCGCACCAGGCCGAG	1R	117.59
100020202|F|0	SilicoDArT	TGCAGACTGCACTGCCTATCCATTTAGAGAGAGCGATAGTGTTTCAATATTGTGCCATCCGTTATAGTC	1R	117.59
100026488|F|0	SilicoDArT	TGCAGAAAGGAAGGTTCATTAATGGAGTCAGTCACGTACACTGGAGTAGGTAGAAACAGAGACGTTCCT	1R	117.59
100029598|F|0	SilicoDArT	TGCAGCCAAATCAAACGCGAGAGATTAGGAGGCCGAATCGAACAGCGCAGGAGGACGCGCAGATCTGAA	1R	117.59
100029598|F|0--40:A>G	SNP	TGCAGCCAAATCAAACGCGAGAGATTAGGAGGCCGAATCGAACAGCGCAGGAGGACGCGCAGATCTGAA	1R	117.59
100033371|F|0	SilicoDArT	TGCAGAAAAGAAGATTCATTAATGGAGTACGTACTAGAAACAGAGACGTTCCTTCCGCTTGCTTAAGTG	1R	117.59
100036058|F|0	SilicoDArT	TGCAGCCAAATCAAACCCAAGAGATTACGAGGCCGAATCGAACAGCGCAGGAGGACGCGCAGATCTGAA	1R	117.59
100048205|F|0--19:C>A	SNP	TGCAGAGTGGCGCGTCAATCTCCACCCCTAACCACCGCCCCGAGATCGGAAGAGCGGTTCAGCAGGAAT	1R	117.59
100048205|F|0--38:C>G	SNP	TGCAGAGTGGCGCGTCAATCTCCACCCCTAACCACCGCCCCGAGATCGGAAGAGCGGTTCAGCAGGAAT	1R	117.59
100056140|F|0	SilicoDArT	TGCAGTCGATCGTTTCCTTGATGGCAGCGTGCACATCTCCGCCGAGATCGGAAGAGCGGTTCAGCAGGA	1R	117.59
100080266|F|0	SilicoDArT	TGCAGGGCGAGAGTTACCTGGGAGACGACGCCGAGTACCCCAAGGGAGACCTTGGCGGCGTCCAGGTCC	1R	117.59
100096396|F|0	SilicoDArT	TGCAGCCGTTTCGGGTTTTGCGGCAGCACCTCCGAGTGGTGCGGAACCGAGATCGGAAGAGCGGTTCAG	1R	117.59
100131150|F|0	SilicoDArT	TGCAGGACAACTGGGATTGGTTCTATATGACCTGCACACAAGGCGAAGGGAAGACAGGTGTTAGTTATG	1R	117.59
c4244_751	SNPe		1R	117.59
c7999_2	SNPe		1R	117.59
rPt-505173	DArT	tgcagaaaaaatataatgcaatagcccccctaaagcacctcctgacatgagcaactcaactgaatcaccttatctgatatacagctttgcataaattttatttgtgccgatgaaaccgatactgcaaaaatgtctttaattagagtcattgtcatcaaaccatggaactcatgcttataagttagtgaccattgatcaacggcttaactacggggaaaatattgttcgtacaaggagaacagtgcaagccatttgtttgcttcttagctactccaaattattctaaaaaatgtttctcctccaaacacccatcatcagttctttctttggaaaagtaaacatccatcatcacttggcctcataatgatttaacctataaaagtcaggtgcaaagtattg…	1R	117.59
tcos44-1R	STS		1R	117.59
100001390|F|0	SilicoDArT	TGCAGGCCTTCAAGACGCAGCCCACCATTTTCCTTTTCACCGATGAGAGCATAAACAAGAAGGTCCGAG	1R	118.14
100010167|F|0	SilicoDArT	TGCAGGCCTTCAAGACGCAGCCCACCATTTTCCTTTTCACCGATGAGAGCAAGCATAAACAAGAAGGTC	1R	118.14
100011209|F|0	SilicoDArT	TGCAGCCACTTGCGCAAACCTCCAGCGCACATGCAGCTTATGTCCCGAGATCGGAAGAGCGGTTCAGCA	1R	118.14
100027100|F|0	SilicoDArT	TGCAGCTGCCAGCCTTCAATATGGCGCGTTCCACTCGTCTCGTCGTTGCCACCGCCATGGCTCTCCTCC	1R	118.14
100031515|F|0	SilicoDArT	TGCAGGCCAATGCCTTGAAGGTGTTCGACTAAAGGCTTAATGATCTTCCCCACCCGCATGCCCAGCACC	1R	118.14
100053203|F|0	SilicoDArT	TGCAGGCATAGGTTTTAACCTAGAAGAGCGATGCATCTTGACTTCTTTTTTTCCATTTCTTGTTGAGAT	1R	118.14
100135676|F|0--65:C>T	SNP	TGCAGCAAGCGCGGCCGCGGGCCCATCATGGCCAGGACCGTCGCGGCCACCATGTTCGTCGTGCTCGGC	1R	118.14
c2592_330	SNPe		1R	118.14
tcos29	STS		1R	118.14
tcos29-5R	STS		1R	118.14
100001076|F|0--8:C>G	SNP	TGCAGCAGCGTGTGGTACTTGATGGTCCACCAGAGCGCCATGTCCGTGATGAGGAACTGCACCTCGCCG	1R	118.7
100011307|F|0	SilicoDArT	TGCAGGTGCAGTTAAGGCACCGAAGCAGCGTCCATATACTACGGATGATGCCGCTAATCTGTGGCAAGT	1R	118.7
100012140|F|0	SilicoDArT	TGCAGAACAATGTCACATTCACTCACACCAGCCGCAGCAGCGTGATCAGATCACAACAGCTACTACTAC	1R	118.7
100012381|F|0--7:T>C	SNP	TGCAGGCTTTTTCTTTGATCTGGTTCCCAAAACACATGATCGATGGTGCCATCTGATGCCACGAGGGCC	1R	118.7
100014147|F|0	SilicoDArT	TGCAGCCATGGAAACAGTTTGAAGTAGGGATCAGAAACGAGCCCGAGATCGGAAGAGCGGTTCAGCAGG	1R	118.7
100016610|F|0	SilicoDArT	TGCAGAACAATGTCACATTCACTCACACCAGCCGCAGCAGCGGTGATCAGATCACGACAGCTACTACTA	1R	118.7
100022481|F|0--8:A>C	SNP	TGCAGGAAAGAGGAGTAGATGGCGCAGAAGGGCTTGAGCCCCTCGCAGGCCAGGCCGAGATCGGAAGAG	1R	118.7
100024562|F|0	SilicoDArT	TGCAGAAGCTGTCCAAGTACCCGTTGATCGACTTCAGCAAGGACGACCAGGTGCACTGCTTCAAGCACG	1R	118.7
100035567|F|0	SilicoDArT	TGCAGAAGCTGTCAAAGTACCCCTTGATCGACTTCAGCAAGGACGACCAGGTGCACTGCTTCAAGCACG	1R	118.7
100045871|F|0--45:C>G	SNP	TGCAGGAGAAGACCGCCAAGAAGGCGGCGCAGGCCACGCAGGGGGCCGACGACGCCAAGAAGAAGAACG	1R	118.7
100067000|F|0	SilicoDArT	TGCAGAGCATCGACCAAAGCAGAGCATATGGAGGCGATCGCCGAGATCGGAAGAGCGGTTCAGCAGGAA	1R	118.7
100067000|F|0--7:C>T	SNP	TGCAGAGCATCGACCAAAGCAGAGCATATGGAGGCGATCGCCGAGATCGGAAGAGCGGTTCAGCAGGAA	1R	118.7
100142410|F|0	SilicoDArT	TGCAGCTGGCATCCGTCCGATCCGAGATCGCAAGAGCGGTTCAGCAGGAATGCCGAGACCGATCTCGTA	1R	118.7
c18065_685	SNPe		1R	118.7
100000799|F|0	SilicoDArT	TGCAGCACCGTAGGAGTAGTATACATACCTCGTCGTCCGAGATCGGAAGAGCGGTTCAGCAGGAATGCC	1R	119.26
100005688|F|0	SilicoDArT	TGCAGTGACGACCTTTGGGCCAATAACACATGGACATTTCAGAGATAAACTATTGCATCAGGTATAGCG	1R	119.26
100008678|F|0--15:C>T	SNP	TGCAGTCAAAAGAGTCGATAGGCAGTGGTTGAGCATAGCATTCTGTACTAACCTCAATTCGGGCATATA	1R	119.26
100009200|F|0--65:A>G	SNP	TGCAGCTCCCGCTTCTCCTTGCCATAGTCCTTCTTGTTCGTGAAGGCGATCTGTTTGTTCACCACACAT	1R	119.26
100009692|F|0	SilicoDArT	TGCAGCAGCAGCAACAAACCCGCACCAATCAGGCAAAGAGGCAAGCGATTTCTTGCCCGAAATTTCTAG	1R	119.26
100010648|F|0	SilicoDArT	TGCAGCAGCAGCAACAAACCCGCACCAATCAGGCAAAGAGGCAAGCGGTTTCTTGCCCGAGATCGGAAG	1R	119.26
100013610|F|0--54:T>A	SNP	TGCAGATGCTGTGCCCACCAATAACTACTATCCTAGAGCAGACAGAATATAAATTCAGAAAGCTGCTTC	1R	119.26
100014812|F|0	SilicoDArT	TGCAGAATCGAGCCGAGATTTTTGCGTCAGATCCGCCGAGATCGGAAGAGCGGTTCAGCAGGAATGCCG	1R	119.26
100016101|F|0	SilicoDArT	TGCAGTCCCTGACCAAGAACTTCACCGACAAGATCGGCGCCGAGATCGGAAGAGCGGTTCAGCAGGAAT	1R	119.26
100018673|F|0--62:C>G	SNP	TGCAGGGTAACTCCAATGGCGAGTCGTCAAAACGGACGCCCTGAAATGTCCCAGACACGTCCCATGCCT	1R	119.26
100022861|F|0	SilicoDArT	TGCAGCTCCACTCCATCTGCATGCATTCCGCCGTCGCATTCTACTACCCGTCTACTTCTGTAGCGGCGG	1R	119.26
100059642|F|0	SilicoDArT	TGCAGAATCGAGCCGAGATTGTTCCGTCAGATCCGTCGAAACCCCGAGATCGGAAGAGCGGTTCAGCAG	1R	119.26
100093429|F|0	SilicoDArT	TGCAGCACCGTAGTACTGTAGTACACATACCTCGTCGTCTGGGGAACGGACGGCCACACTGAGACCGAG	1R	119.26
100110821|F|0	SilicoDArT	TGCAGGCGTCCGTTAACGAAATGCATGTTAACCGAGATCAGAAGAGCGGTTCAGCAGGAATGCCGAGAC	1R	119.26
100129900|F|0	SilicoDArT	TGCAGGCGTCCGTTAACGAAATGCATGTTAACCGAGATCGAAAGAGCGGTTCAGCAGGAATGCCGAGAC	1R	119.26
100130613|F|0	SilicoDArT	TGCAGGATCGATTGCTTCGTTCACATCCGAGATCGAAAGAGCGGTTCAGCAGGAATGCCGAGACCGATC	1R	119.26
100137002|F|0	SilicoDArT	TGCAGAGACCTGTCCCTTTTGGCACCGAGATCGAAAGAGCGGTTCAGCAGGAATGCCGAGACCGATCTC	1R	119.26
100137672|F|0	SilicoDArT	TGCAGAAGCCACTTGCTTACGGGCCACCCCACCGAGATCAGAAGAGCGGTTCAGCAGGAATGCCGAGAC	1R	119.26
c3512	SNPe		1R	119.26
c3512_6	SNPe		1R	119.26
rPt-399723	DArT	TGCAGATAGTTGATTGTCACCTGCGTGAAAACTGGAAAATTACTGCCAGTGAGTTCAACTGGTACTATTGAAAAGAAAAGATAGGAAAGGGACCGAATGCTAAGCTCCTTTGCACCTATTAACTGCAAGCACACACGGACAGGAAGCGCTCCGATTTCTAGTGCCGACAGACACTAGTGCTGCCAAGCGCCAAAGATTGGGTGATTCAGCTTCACGGGCAGATCTTCCTCCGAAGTACGTAACAAAATGTGTTTGTCAAAAACGTTCTTATATTTTGGGACAGAGGAAGTAGTAGTTTACGTTGTCATTTGCGGCTTCTCGCATGTGCCTTGCGTGCGACAGGATTGCTTCTTGTTGCCTGTCTTTTTTGGCTCGGGTGCTGCA	1R	119.26
100002707|F|0--20:A>G	SNP	TGCAGGCAACAAAATGGCTCAATTTTTATGTGAAAATAACACATCGTATACTACCGAGATCGGAAGAGC	1R	119.81
100004429|F|0	SilicoDArT	TGCAGAAATTTCCTTTCAAAAGTTTCTAGATTCGGTCCTGATTTTCCTACGAGGGCATACCGAGATCGG	1R	119.81
100004429|F|0--13:T>C	SNP	TGCAGAAATTTCCTTTCAAAAGTTTCTAGATTCGGTCCTGATTTTCCTACGAGGGCATACCGAGATCGG	1R	119.81
100004528|F|0--56:C>A	SNP	TGCAGTTTGCTTGGTTTTCTTACTTTGAGGTCTTTGTTGTGCCCTTTCTGCTCCTCCTGCACTTCCCGA	1R	119.81
100004864|F|0	SilicoDArT	TGCAGCTCTAGTGGGGAATTTAGGTACTGATAAATAGTGGCATTATCTTTCATTACGTCCGAGATCGGA	1R	119.81
100006284|F|0	SilicoDArT	TGCAGCTCATCGACCTCACCACCGCCCTCCTAGTCCACCGAGATCGGAAGAGCGGTTCAGCAGGAATGC	1R	119.81
100010394|F|0	SilicoDArT	TGCAGCCAAGTCGTTGGTGCATTTCTGGATCTGAACAGTAAGGTTTTTGTGGTCAGTAGCTCCGTATGC	1R	119.81
100011625|F|0	SilicoDArT	TGCAGCGCGTGAGCGAAATCCATAACCACGTCGTATATGATGTGTGGCACACCCGTTCTGAATATTCCC	1R	119.81
100013857|F|0	SilicoDArT	TGCAGATTCTTAGCTATGAATGGAGCATATATGGACCATGAAGGAAGCTTCCAGATTTTCACCGAGATC	1R	119.81
100013881|F|0	SilicoDArT	TGCAGTGCACCAGAGCCATATCTCCGAACTGAACAAACTACCACTAGAACTGCATGCGACTAAAATCAC	1R	119.81
100014775|F|0	SilicoDArT	TGCAGCCAGGTCGTTGGTGCATTTCTGGATCTGAACAGTAAGGTTTTCGTGGTCAGTAGCTCGGTATGC	1R	119.81
100015813|F|0	SilicoDArT	TGCAGCATCTCCACCCAGATAAGACATCTTCCAAACCAGCAGAAAACAGTTTCTCCGCGGTAAAGCAGT	1R	119.81
100015813|F|0--47:A>T	SNP	TGCAGCATCTCCACCCAGATAAGACATCTTCCAAACCAGCAGAAAACAGTTTCTCCGCGGTAAAGCAGT	1R	119.81
100017077|F|0	SilicoDArT	TGCAGCATCTCCACCCAGATGACATCTTCCAAACCAGCAGAAAACAGTTTCTCCGCGGTAAAGCAGTAA	1R	119.81
100019397|F|0	SilicoDArT	TGCAGCCGCACGGTCCATACTATGTCCGACACGTCCTCCTCGGGCACGCTCAATAACGAACTACTACTC	1R	119.81
100020329|F|0	SilicoDArT	TGCAGAAGGCGCCTCCAAGCTCTCCGCCCGCCCGCCATAGCTCCAGAGCTCAGCACCACACCACCGCCT	1R	119.81
100022325|F|0	SilicoDArT	TGCAGGTGCAGGGGTTTGTTTATATCTAGTATTTGTTTCGGGTGCGTTCAGGCTTAATCAATTGCCGAC	1R	119.81
100022871|F|0	SilicoDArT	TGCAGATATTTCCGGACGGAGGAAGTATTGTACAACAACAAAATAAAGATGCCTCACCGAGATCGGAAG	1R	119.81
100025407|F|0	SilicoDArT	TGCAGAATGGGGTTTTGTTGCCCAGGGGTCCGCATTCCGTCAGTTACTGTGTGCGTGTGCCCGAGATCG	1R	119.81
100030205|F|0	SilicoDArT	TGCAGAACAACGCGACGAATTTCGTACGAGTAACCAAAGCCTGAAGAGTTCAATTCCGAGATCGGAAGA	1R	119.81
100031531|F|0	SilicoDArT	TGCAGAGAGATGGATGCAGCTCTTCCTGTACACTCCCTGCTGGATGAGCGAGTTTCCCGAGATCGGAAG	1R	119.81
100031531|F|0--28:T>C	SNP	TGCAGAGAGATGGATGCAGCTCTTCCTGTACACTCCCTGCTGGATGAGCGAGTTTCCCGAGATCGGAAG	1R	119.81
100033539|F|0	SilicoDArT	TGCAGAGATCCTACACTGAAACAGAGTTTTGTTTCAGTGTTGTATGCTCGATACCAAGTGTCGTCCAGT	1R	119.81
100034354|F|0--32:G>T	SNP	TGCAGCTCCTCGTACCACCGTATGCCACTTGCGCTCCGAGATCGGAAGAGCGGTTCAGCAGGAATGCCG	1R	119.81
100058879|F|0	SilicoDArT	TGCAGGTGGCAGCCATGAAAGGCGTCCTCAGGCGAAGCGATCGTCCGTATAGCCACGCGGGGAACGCGA	1R	119.81
100066277|F|0	SilicoDArT	TGCAGACAAGCAGTGGAAAGCGGTAGACTTTCCGCACCAAAGCTGGCAATGGCATGGCCGTTCGGTCAG	1R	119.81
100066277|F|0--62:C>T	SNP	TGCAGACAAGCAGTGGAAAGCGGTAGACTTTCCGCACCAAAGCTGGCAATGGCATGGCCGTTCGGTCAG	1R	119.81
Xscm93-1R	STS		1R	119.81
100158860|F|0--12:C>T	SNP	TGCAGAAATTTCCTTTCAAAAGTTTCTAGATTCGGTCCTGATTTTCCTACGAGGGCATACCGAGATCGG	1R	119.81
3348082|F|0--8:G>A	SNP	TGCAGCCAGGTCGTTGGTGCATTTCTGGATCTGAACAGTAAGGTTTTCGTGGTCAGTAGCTCGGTATGC	1R	119.81
100036377|F|0	SilicoDArT	TGCAGAGATCCTACACTGAAACAGAATTTTGTTTCAGTGGTGTATATGCTCGATACCAAGTGTTCGTCC	1R	120.37
c1138_506	SNPe		1R	120.93
100011463|F|0	SilicoDArT	TGCAGGGAGGAGGTACCACTAAAGGTGAGCTTCTTTTGCCTGCAATTTGGGCGTTCCAGACTCCCCGAG	1R	121.5
100012335|F|0--10:A>G	SNP	TGCAGGGCACACTTTTGCTGTTTATGCAGAATGGATTTAGAAATAGTTTTGATTTTTGAACAAGGATTC	1R	122.06
100022929|F|0	SilicoDArT	TGCAGGCATAGCGACAATATTGTCGACGTTGTACCGCACACGCCTGCTAGCAACCTCTTGGACTTGCTT	1R	122.06
100014957|F|0--29:C>G	SNP	TGCAGAGCTTCATCAGCATCACCATCGTGCTCTTCATGCCCATCTACGACCGCGCCATCGTGCCGCTGG	1R	122.61
100017657|F|0	SilicoDArT	TGCAGCCCCACCATGGTGAACACGTCCGCCGCGCCGAACAGCACGTACTGCGGCACCATCCACCACAGG	1R	122.61
100017657|F|0--8:C>G	SNP	TGCAGCCCCACCATGGTGAACACGTCCGCCGCGCCGAACAGCACGTACTGCGGCACCATCCACCACAGG	1R	122.61
100019794|F|0	SilicoDArT	TGCAGATGTGAGCGTCTCATCACTGCTACCGAGCTCACTGTCGCTGACTTGGTACACTCGGACGAGTTC	1R	122.61
100020744|F|0	SilicoDArT	TGCAGATGTGAGCGTCTCATCACTGCTACCGAGCTCACTGTCGCTGACTTGGTACACTCGGACGAGACC	1R	122.61
100028754|F|0	SilicoDArT	TGCAGGTGAAACTTTTTGCTAATGGCAAACACCAGACACATTTTTCTCCCTACTCAAGGTGAACACTCC	1R	122.61
100035336|F|0	SilicoDArT	TGCAGACAAATGGGAGTACTACCATAATATGCTTTGTTTACTGTGATGCGATCTGACATGAGTTCCTGA	1R	122.61
100046523|F|0	SilicoDArT	TGCAGCGGCATCCTAGCACGCCCGCGGCCCTCACAGATACGTCCAACGCACACGCTAGCACAACAGGCC	1R	122.61
100089483|F|0	SilicoDArT	TGCAGACGGCCTTCTTCTACGTCTCGCTGTACCTGGTGGCCATCGCGCAGAGCGGTCACAAGCCCTGCG	1R	122.61
c27314_235	SNPe		1R	122.61
3735268|F|0--55:T>C	SNP	TGCAGACGGCCTTCTTCTACGTCTCGCTGTACCTGGTGGCCATCGCGCAGAGCGGTCACAAGCCCTGCG	1R	122.61
100000850|F|0	SilicoDArT	TGCAGTGCTCCAGGAAACATGTATGAGCTGACGCATGTCATCCGAGATCGGAAGAGCGGTTCAGCAGGA	1R	123.17
100007302|F|0	SilicoDArT	TGCAGGCTCACGAGACACCGCATAGCTTGAGTTAATCATCCATGTATCCTGATACAAAGAACAAAAAAA	1R	123.17
100015151|F|0	SilicoDArT	TGCAGCCCAAAAGAGGTCGGGAATCGATCGAGAGCGGTGACCATGAAAATGGATCAGCGGATGATCATC	1R	123.17
100021582|F|0	SilicoDArT	TGCAGGGCAATAAATAACCTGGTGGTGACAGTGATGAAATGGGCCAGCTTACACTACTGCCGAGATCGG	1R	123.17
100023634|F|0	SilicoDArT	TGCAGTAATAAGCAGAGGAAAGAAAAAAACACTAAACAGTAAATTAACTCTGGATTTCGTACTTCTGCT	1R	123.17
100025108|F|0--42:A>T	SNP	TGCAGATTTGGGCCTTGAATGTAGTACTGAAGACTGTTACAAAATGGCGAAGAGTTACTCAATTTTTTA	1R	123.17
100026664|F|0	SilicoDArT	TGCAGACCACCGCTCCGAGTGGACAAGCTCACGCCGTCGGTAAGCACACGCGCACGCATGGGATTCGTA	1R	123.17
100032812|F|0	SilicoDArT	TGCAGCGTCAAATAGGAATTGCCCTAGACACCGTCTCTGTCCAGTTGGACCATATATGGAGGACCAGTA	1R	123.17
100033981|F|0	SilicoDArT	TGCAGAAGAGGAAATTGAACAGGGACAGAGTTTAGCAAGGCAACCATATGTACTGTGGAAGAGTCTAGC	1R	123.17
100036357|F|0	SilicoDArT	TGCAGGCACTCCTGCCTGGGCACCGAGTAGGATATCCGAGATCGGAAGAGCGGTTCAGCAGGAATGCCG	1R	123.17
100055028|F|0	SilicoDArT	TGCAGGAGGTCAGTACTCTGCTTCACAGTCAGATTCAGTCCTGTCTTTCGGTGGGTTTGCTCTATTTCG	1R	123.17
100056972|F|0	SilicoDArT	TGCAGTCTTCTACAGACATTGTGCTGCTTGATGACGAACTTTCGAGCACCGTCGTGGTGACCATCACCG	1R	123.17
100131195|F|0	SilicoDArT	TGCAGGAAGTAGTGCTCCACCAATTCCTACACAGTCGGTGCCATCACTAAGACGCGGCCACCCACCGAG	1R	123.17
100144524|F|0	SilicoDArT	TGCAGCATGTGCAGGGAACGGTGGGAGCGCCAAGCCGACAGCCATGCCCGCGCAATGCCGAGATCGGAA	1R	123.17
100147221|F|0	SilicoDArT	TGCAGTGAAAGAAAAAATGATTTTTGCATTTTTGCTCTCACTACTCTTCTATAAAGCGAAAAATATTTA	1R	123.17
100045863|F|0	SilicoDArT	TGCAGGGGGCCGTGCTATTTGGAAACAAGTTGGAAGTCAACTACTCGAAGTACCCCACCATAACCCCTG	1R	123.73
100066634|F|0--44:T>C	SNP	TGCAGCTGCTCGTGCCACCTCGGAACCTTGTTGCGGAGCACCAGTGGCCTCTCCTTGTGCTCTCCGTCT	1R	124.29
c58086_223	SNPe		1R	124.29
100000899|F|0--19:G>C	SNP	TGCAGGTAGCATATCACATGATACCTATGTTGCTTCTCCGAGATCGGAAGAGCGGTTCAGCAGGAATGC	1R	124.84
100006933|F|0--30:G>A	SNP	TGCAGACGCAAGGGCATAGTTAGCTCCTCAGTTAAATATATGGATCCGCCATGACCAAGGTTGCAAGGT	1R	124.84
100008470|F|0--48:A>C	SNP	TGCAGGCTACCTGGTTCATTTCATCTTTGGAGTGACAGGGAAGTAACCACTGTAGGGCTTTGACCTTCA	1R	124.84
100011810|F|0	SilicoDArT	TGCAGTGCCATTTCCATAGTGCACATCTATGTCAACAACGGCAACCTTTGCGCGGCCAGAATCCAGAGC	1R	124.84
100012608|F|0--47:C>T	SNP	TGCAGCACGCTGTTCACAACAGCACTGCTGCAAAGCAAACGCATATGCACCCCTGCCCCCGAGATCGGA	1R	124.84
100016161|F|0	SilicoDArT	TGCAGAGATCGGTCTAGCTTTACATAGCTAGTTGATCCAGGAGTTGAAGTGTGGTGGCCAGCAGGAAGC	1R	124.84
100016215|F|0	SilicoDArT	TGCAGCAGATCTAACGTCCTTTATCCGCACAGTGCTCCCCCACACCACACTGTTGTCGGACTGATCCGA	1R	124.84
100016282|F|0	SilicoDArT	TGCAGCGGGAACAACAAGAGAGAGACTTGTACGCATGCGCTTTCCGCTGTGACAATCTCAACAACCATA	1R	124.84
100022352|F|0	SilicoDArT	TGCAGAGATTGAGTCAAAACCGAGGACGGTTTCCATTAAAGGGGAAGAGGATGATATGACCCGAGATCG	1R	124.84
100022644|F|0	SilicoDArT	TGCAGAGATCGATCTAGCTTTACATAGCTAGTACATCCAGGAGTTGAAGTGTGGTGGCCAGCAGGAAGC	1R	124.84
100024233|F|0	SilicoDArT	TGCAGGTTCGACGCCCCCTGCTCCAGTATCCGCATCGCGTCCTCTGGCAAACCAGCAGCAAAACAGGGG	1R	124.84
100027372|F|0	SilicoDArT	TGCAGTGCAGGTAGATCGATACCAGCAGGAGATCTTCACGTCGGTTACGATGTGACAAAAAAACATCTG	1R	124.84
100027951|F|0	SilicoDArT	TGCAGCTTCGGGCCTTCGTCCTGGGAGGATGAAGAGAACCGAGATCGGAAGAGCGGTTCAGCAGGAATG	1R	124.84
100028932|F|0	SilicoDArT	TGCAGCAGCAGAGAGTCTGCCTGCCCGCCTCCCCTATTAATAAGGCGCCGTGCGCGTGCTGGCCACCTC	1R	124.84
100029594|F|0	SilicoDArT	TGCAGCGGTGGCCAGAAGAGAGATACTTGTACGCATGCGCTTTCCGCTGTGACAATCTCAACAACCATG	1R	124.84
100030553|F|0	SilicoDArT	TGCAGCAGTCGTCGGAGCAGGCCGAGGAGGCGCTCGAGCAGGGGCTAAAGCAGCTTCACCAGTCACTGG	1R	124.84
100038246|F|0	SilicoDArT	TGCAGGGCGGTGGCGAGGGCGCCGCCGAGGCCGTGAGCTTGCTCATGCTGGCCATGTCCACGCTGCTCT	1R	124.84
100046925|F|0	SilicoDArT	TGCAGGCCGTCGTGGCGCGCGCCCAGGGCGAGATGCAGGACTCATTCGTCTGGCTCTTCCAGCACATCT	1R	124.84
100047671|F|0	SilicoDArT	TGCAGACACATCTGAGGCGACGCTGGAAGACGTGCTGCTTAGTGAGCTCTCGTCGCTCTGGCCCGAGAT	1R	124.84
100050868|F|0	SilicoDArT	TGCAGCTTCGGGCCTTCGTCATGGGATGAAGAGAACCGAGATCGGAAGAGCGGTTCAGCAGGAATGCCG	1R	124.84
100052851|F|0--50:C>T	SNP	TGCAGGAGCGACGTCTTGGGCATCACGAACGACACGTTGTTGATGCTCGCCGCGAACCGAGATCGGAAG	1R	124.84
100053313|F|0	SilicoDArT	TGCAGGCCCAGGTCCTCGATGCGAACCTCAGCACCATTGTCGAAGACTGCATGCGGCACCACGACGAGC	1R	124.84
100069524|F|0	SilicoDArT	TGCAGTTCCAAGATGGACTTCTGTGATCTCGTGCAGGGTGTAGTCATGGAAGAACTCCGAGATCGGAAG	1R	124.84
100074710|F|0--67:C>A	SNP	TGCAGGGTGCACGCAGGTGCCCATAAGTATCGTGGTGTTCCATAGGAGGGGATCCAGGCCCGTGCCGCC	1R	124.84
100075095|F|0	SilicoDArT	TGCAGGTACTGCACCTTCTCGATTTGCTAACTCCTTTTGGGCTCTGATCTGCGAGTGGGAGAAGTAACC	1R	124.84
100075095|F|0--34:T>G	SNP	TGCAGGTACTGCACCTTCTCGATTTGCTAACTCCTTTTGGGCTCTGATCTGCGAGTGGGAGAAGTAACC	1R	124.84
100081849|F|0	SilicoDArT	TGCAGAGTGCCCTGAACCACACAAAGTCGATCGATCGTTAAGTTCGGGAATTGCGAATTGATTTGTCAT	1R	124.84
100081849|F|0--64:G>C	SNP	TGCAGAGTGCCCTGAACCACACAAAGTCGATCGATCGTTAAGTTCGGGAATTGCGAATTGATTTGTCAT	1R	124.84
100087009|F|0	SilicoDArT	TGCAGAACGGGCTAAGGGGTGGATTCAGCAACATCTCAGTGGGGTATCCACCTGCTATGAAGCCTGCCG	1R	124.84
100146108|F|0	SilicoDArT	TGCAGAGGATGTAGCGGCGCCCTCATGTGTCGCCGTGCGACACGACGATGGCCACGCCCGAGATCGGAA	1R	124.84
c7187_1089	SNPe		1R	124.84
rPt-508676	DArT		1R	124.84
rPt-508969	DArT		1R	124.84
tcos121-1R	STS		1R	124.84
3602574|F|0--11:G>A	SNP	TGCAGAGATCGGTCTAGCTTTACATAGCTAGTTGATCCAGGAGTTGAAGTGTGGTGGCCAGCAGGAAGC	1R	124.84
3602946|F|0--50:C>T	SNP	TGCAGTGCCATTTCCATAGTGCACATCTATGTCAACAACGGCAACCTTTGCGCGGCCAGAATCCAGAGC	1R	124.84
100000899|F|0	SilicoDArT	TGCAGGTAGCATATCACATGATACCTATGTTGCTTCTCCGAGATCGGAAGAGCGGTTCAGCAGGAATGC	1R	124.84
100027372|F|0--13:G>T	SNP	TGCAGTGCAGGTAGATCGATACCAGCAGGAGATCTTCACGTCGGTTACGATGTGACAAAAAAACATCTG	1R	124.84
tcos91-1R	STS		1R	128.38
100003824|F|0	SilicoDArT	TGCAGAAGAAATAGATACCCCCACTACCAAACCCCAAGCCCACCGAGATCGGAAGAGCGGTTCAGCAGG	1R	131.91
100017651|F|0	SilicoDArT	TGCAGAACGAATAGATATACCCCCACCATCAACCCCAAGCCCACCGTACCAATCTTCTTCCGTAGTCTT	1R	131.91
100020587|F|0	SilicoDArT	TGCAGAACTTTGTTTTACCTATATAGCTCTAGTAGGCCTTGGTCATGGATTGTATTTGGTTGTCAAGAT	1R	131.91
100022919|F|0	SilicoDArT	TGCAGAACGAATAGATATACCCCCACCATCAACCCCAAGGCCACCGTACCCATCTTCTTCCATAGTCTA	1R	131.91
100042049|F|0--64:G>C	SNP	TGCAGATGCAACCAAATCAATCACCCCAGCTCAACAACAACGCCAACCCTAGCGAAACGAGATAGAGGA	1R	131.91
100052632|F|0	SilicoDArT	TGCAGCAACTACACATATAATGTATGCGACCCAGTGACCGAGATCGGAAGAGCGGTTCAGCAGGAATGC	1R	131.91
100123911|F|0--5:A>G	SNP	TGCAGATGCAACCAAATCAATCACCCCAGCTCAACAACAACGCCAACCCTAGCGAAACGAGATAGAGGA	1R	131.91
100012600|F|0	SilicoDArT	TGCAGTTGCGGACAACCATACGTGAGAATTACTGGCTCCGATTAGACAGCACGACATGCATGATTACCG	1R	132.47
100014207|F|0	SilicoDArT	TGCAGCCCGACCAGCGCGTCAGAATTTATCTTTTGTCCCCATCTCTCCGCTAATGACACTGCACGGCGA	1R	132.47
100017746|F|0--40:C>T	SNP	TGCAGAGCTATAGATAAAGTTGTGAACTGGTAGAGTCCTTCATCATACCCTACGGCCTACGCTACACAC	1R	132.47
100017746|F|0--57:T>A	SNP	TGCAGAGCTATAGATAAAGTTGTGAACTGGTAGAGTCCTTCATCATACCCTACGGCCTACGCTACACAC	1R	132.47
100018412|F|0	SilicoDArT	TGCAGCCCGACGAAAGCGTCAGAATTTATCTTTTGTCCCCATCTCTCCGCTAATGACACTGCACGGCGA	1R	132.47
100025222|F|0--23:T>C	SNP	TGCAGTTACAAGCATCGTTTGTTTGGCCCTCAAAAATATATATGTCTTTTTCTTGTAGATCACAATAAA	1R	132.47
100025538|F|0--50:T>G	SNP	TGCAGAGCTGGGCCTTCCACTCCCCTGCGTTGAAGACGAAGAAAGGGTTGTCCCGAGATCGGAAGAGCG	1R	132.47
100031390|F|0--7:C>T	SNP	TGCAGCACGCGCCTCCACCCCACCCTACCCATCCCGCTGCCGCCGAGATCGGAAGAGCGGTTCAGCAGG	1R	132.47
100035750|F|0--51:C>G	SNP	TGCAGCCAGCCAAATTCGCGCGCCGCACGGTCAACGAGGCCGCCCTGACTCCACGACCTTACGAAAGCA	1R	132.47
rPt-389887	DArT		1R	132.47
rPt-401574	DArT	TGCAGGTTTATAAACCAGGCGCAAACACTTTCAGAAACTTGCTTCCCGATTCTCATTGTCCGTGTAAATGTTTGTGGCTCCACAAACGACCTGCTTTCCTTAGATGGTTATTTTTGCAGTACAATTTTGCCAATAGGCATACTTTTGGTTATATGTAATCTAAGGTTCCCTTATCTGGCCATTAAATTTCTCGGCATGGCCAGTACGACAGTAGCTTCTGAAACATTTCCCCTGTGTTACTATGTTGATACAGTAAGAAGCTAAATTCTTGGTTGTTGTTCATGTGTACTGCCGTTCAAGCTTAATACAGACCTACCACACAATCTTACATTCATCCAGGGCAGCAAGCGACTTCATTGCAATACCGTGCGCCCTCAGTTTTATTGGTTGGTGTTGTCC…	1R	132.47
100035750|F|0	SilicoDArT	TGCAGCCAGCCAAATTCGCGCGCCGCACGGTCAACGAGGCCGCCCTGACTCCACGACCTTACGAAAGCA	1R	132.47
100001538|F|0	SilicoDArT	TGCAGGCTACAGCCCACTGGGATGCATAGCTTTGTACCGAGATCGGAAGAGCGGTTCAGCAGGAATGCC	1R	133.02
100005043|F|0	SilicoDArT	TGCAGCAACTTTTTAAATGTGCATGCAACTGCAACGACAATGGATTCCATTACTAGCCACCGTACACAA	1R	133.02
100006246|F|0--37:T>A	SNP	TGCAGTAAGATGTCATATGATTGGCGTAATGACTCGATGGTGTGTTACTTGGTCTGTGAGGCCCATATG	1R	133.02
100010396|F|0	SilicoDArT	TGCAGGATTCGACCTTAAGGAAAAAGAAATGGGATCGCCAATGTAGCCAAACAGAATGTAAAAAAAATG	1R	133.02
100010745|F|0	SilicoDArT	TGCAGAAACTCCCTTTCCTATGTGACTTCAGCTTTCACCGAGATCGGAAGAGCGGTTCAGCAGGAATGC	1R	133.02
100012093|F|0	SilicoDArT	TGCAGAATTCCGAGGACCGCGCAATAACTCGCGACTATATGCAGTAGTAGTAGGAGCAGCAGCAGAGCG	1R	133.02
100014692|F|0--41:T>A	SNP	TGCAGGGTTTCATGTAGGGGAGGGCAACCTGTTCCCAGCCCTCGATTTCCACCGAGATCGGAAGAGCGG	1R	133.02
100015931|F|0	SilicoDArT	TGCAGGATTCGACCTTAAGGAAAAAGAAATAGGATCGCCAATGTAGACAAACATAATGTAAAAAAATGG	1R	133.02
100017958|F|0	SilicoDArT	TGCAGGATTCGATCTTAAGGAAAAAGAAATGGGGTCGCCAGTGTAGACAAAAAGAATGTAAAAAAATAG	1R	133.02
100018690|F|0	SilicoDArT	TGCAGGTTCGAGGTCTGCATGGGTCTCCGCCATGCCGTCGTCATGCTCCCTACTGCCAATCCGCCCTCC	1R	133.02
100018902|F|0	SilicoDArT	TGCAGTTCCCAATGCAAGCGTGCGGTTCGGCTGCCCACAGATCGGGACTTGGCGCTCATCCTAGACATG	1R	133.02
100020303|F|0	SilicoDArT	TGCAGGTTACCAAATTTGTCATCCAATGCCATGATCTCCTTTGCCTTGGGCTCGAGCAAGTCATAGCAG	1R	133.02
100021369|F|0	SilicoDArT	TGCAGTATGAAACAAGCAGGTAGTTCATCACTCAGAAACAAACAGCCCCTATTTTGGTCCACATCCTGA	1R	133.02
100021369|F|0--33:A>G	SNP	TGCAGTATGAAACAAGCAGGTAGTTCATCACTCAGAAACAAACAGCCCCTATTTTGGTCCACATCCTGA	1R	133.02
100022959|F|0	SilicoDArT	TGCAGATCACCCACTCTGTGGCAGTTGTTTCTCCTGTGACCTTCAATGCCACAATTTTTGCACCTCGCT	1R	133.02
100025341|F|0	SilicoDArT	TGCAGGTTTGAGGTCTGCACTGGTCTCCGCCATGCCGCCGTCGTGCTCCCTACTGCCAATCCGCCCTCC	1R	133.02
100027345|F|0	SilicoDArT	TGCAGGCCGTGGTGGAGCTCAAGGACTTCTTGGACCACACCGCCATGCTCGCCATGCCCAGCCAGAGGA	1R	133.02
100027364|F|0	SilicoDArT	TGCAGAGTCACCATCCAAGATGTGTTTGCGCACCTTAATCATGCAGCATTTGGACTCGTATGTGTATGT	1R	133.02
100028697|F|0	SilicoDArT	TGCAGGCGGTCGTGGAGCTCAAGGACTTCTTGGACCACACCGCCATGCTCGCCATGCCCAGCCAGAGGA	1R	133.02
100036176|F|0	SilicoDArT	TGCAGAAGGTCCCAATTGCTGAAGAACGGGCCCTGCAACGCTGTATGGAGCCCGCAAAGCTAGCGCTCC	1R	133.02
100038588|F|0--26:G>T	SNP	TGCAGTATCCTCCTGAGGTCGTCGGCGCGCACGAAGCCGAGATCGGAAGAGCGGTTCAGCAGGAATGCC	1R	133.02
100040091|F|0--67:G>C	SNP	TGCAGTAAGATGTCAGATGATTGGCGTAATGACTCGATGGTGTGCTCTATGGTGTGCTGCATTGAGCGA	1R	133.02
100041740|F|0	SilicoDArT	TGCAGGCCCATCAAGCGACTAAAGCCCACGGCCCGTTCACCGCGGTTATTTCATTCCGTCTCCGAGATC	1R	133.02
100043705|F|0	SilicoDArT	TGCAGTTCGGTGGTGTGTGGCGTGCGGTTCCCTTACTTTACAGATCGGGACTTGGCGCACATCCTAGAC	1R	133.02
100044201|F|0--24:C>T	SNP	TGCAGCGGCTCTAAGAAGAGTGAGCGTTGTTGTGCCTTATTTTTCGGTCAGTCCGAGATCGGAAGAGCG	1R	133.02
100053444|F|0--30:G>T	SNP	TGCAGCTCAATCGCATGCAACGTGGTTGTGGTAGGCGATCCGAGATCGGAAGAGCGGTTCAGCAGGAAT	1R	133.02
100061903|F|0--16:G>C	SNP	TGCAGCCGACCCTGGCGACCGAGTACGCGAGCCAGGCCGAGATCGGAAGAGCGGTTCAGCAGGAATGCC	1R	133.02
100061903|F|0--28:G>C	SNP	TGCAGCCGACCCTGGCGACCGAGTACGCGAGCCAGGCCGAGATCGGAAGAGCGGTTCAGCAGGAATGCC	1R	133.02
100079462|F|0	SilicoDArT	TGCAGAGCACGGGTGTAGTATGTACTATGAATTATGATGGTCGTGTCAGGGCGTAGATGAGGCGTGCAC	1R	133.02
100079462|F|0--52:G>A	SNP	TGCAGAGCACGGGTGTAGTATGTACTATGAATTATGATGGTCGTGTCAGGGCGTAGATGAGGCGTGCAC	1R	133.02
100108794|F|0	SilicoDArT	TGCAGTGTAGCATCGCCGACGGCTAGCGGTGGAGCATCGTTGCGCTACCGAGATCGGAAGAGCGGTTCA	1R	133.02
100111197|F|0	SilicoDArT	TGCAGGATTCATCCCCAAATCATTTATCTTTTTTCCCGAGATCGGAAGAGCGGTTCAGCAGGAATGCCA	1R	133.02
c6929_651	SNPe		1R	133.02
rPt-401334	DArT	tgcaGaaGaacgggccttgcaacgctgtatggagcccgcaaagataccgctcctaaagctcgtggtacaacataaccaagttccccgtcccagatccattcccctcgtcctccttcaaagaaattccgacaactccctcttgatttgattgtgtgtgaagaacacatagccctggcagtcaagctgatttatagctggcagcgtgggaagagcagcgctatgaGacaattgggattaatcgtagattgcaaaaatgaatgagcataagtattgccaggagggggagggatacctgcAaCtatgctacActtacggacaggtttgtacagatttcaagctacaggctgaTggggcaagatacgattggtgattaaggggannnnnnnnnncccacttgaa…	1R	133.02
3342957|F|0--17:T>C	SNP	TGCAGGCTACAGCCCACTGGGATGCATAGCTTTGTACCGAGATCGGAAGAGCGGTTCAGCAGGAATGCC	1R	133.02
3345548|F|0--28:C>T	SNP	TGCAGGGTTTCATGTAGGGGAGGGCAACCTGTTCCCAGCCCTCGATTTCCACCGAGATCGGAAGAGCGG	1R	133.02
3602994|F|0--7:C>G	SNP	TGCAGGCCGTGGTGGAGCTCAAGGACTTCTTGGACCACACCGCCATGCTCGCCATGCCCAGCCAGAGGA	1R	133.02
100006246|F|0	SilicoDArT	TGCAGTAAGATGTCATATGATTGGCGTAATGACTCGATGGTGTGTTACTTGGTCTGTGAGGCCCATATG	1R	133.02
100001059|F|0	SilicoDArT	TGCAGATGGCAAAAACGTTGCAGCCAGCAAACAATCTTATCATCATCCTCGGACAGAACTACAGCCGAG	1R	133.58
100009449|F|0	SilicoDArT	TGCAGCCACTTCTGGGATCCTAGGACAAACCCTCTCTGTTCCAACTTCCAACACGAAGCGTCTCGGCCG	1R	133.58
100009449|F|0--15:G>T	SNP	TGCAGCCACTTCTGGGATCCTAGGACAAACCCTCTCTGTTCCAACTTCCAACACGAAGCGTCTCGGCCG	1R	133.58
100010478|F|0	SilicoDArT	TGCAGATCGCGAGGACAAGGAAGACAAGCAGGTACTAATTGAAACCGTGCAGTTCATTCCTGCGGGAAT	1R	133.58
100011303|F|0	SilicoDArT	TGCAGACCTTCCTCGACATGTAAATGCTGATTAAACTCCGAGATCGGAAGAGCGGTTCAGCAGGAATGC	1R	133.58
100012293|F|0	SilicoDArT	TGCAGGCGCACAAAGAAGTTGGCATCAGTATAAATACTCCTATCCGAGATCGGAAGAGCGGTTCAGCAG	1R	133.58
100020496|F|0	SilicoDArT	TGCAGAGGCAGCAATAAAACGCGGAAAAGAAGTAATCAATCCACACGCAATTCAGAGTCCAGATGAGAA	1R	133.58
100022657|F|0	SilicoDArT	TGCAGCCCCGAAAACTTAAACATTGAATAAAGCTCTCAAAGGACAAGATACAGTAATCACCTCAGACGA	1R	133.58
100022657|F|0--5:C>A	SNP	TGCAGCCCCGAAAACTTAAACATTGAATAAAGCTCTCAAAGGACAAGATACAGTAATCACCTCAGACGA	1R	133.58
100026072|F|0	SilicoDArT	TGCAGAAAGCCTACAGAGACAGCAAGAAAACACGGAAAAGAAGTAATCAATCCACACGCAATTCAGAGT	1R	133.58
100041881|F|0--26:C>G	SNP	TGCAGGCGGCCCTTGTAGCTGCGGTCCGAGATTTGATCCCAAAACTCGAGCAGCTCCGCCTTGTCGATG	1R	133.58
100074623|F|0	SilicoDArT	TGCAGTTTCACTCGCGCGAGTCAGTTTATCAGCCTGTAAGATCTCACTTGGTTGAAGTGAATGGCCGAG	1R	133.58
100078457|F|0	SilicoDArT	TGCAGAGGGAAGGCAGCTCGGGCGATCTCTCTCTCTCTGGCTGCAACGATCTCTGCGCGACGTGGCGGC	1R	133.58
100098898|F|0	SilicoDArT	TGCAGGTCATGGCCAACATCGCCGACGCGGTGATTGGGGAGACCGAGATCGGAAGAGCGGTTCAGCAGA	1R	133.58
100111493|F|0	SilicoDArT	TGCAGGAGAACGGCATGGGGGCGGTTCACTTGGCGTCGGCGTCGCCGAGATCGGAAGAGCGGTTCAGCA	1R	133.58
100005936|F|0	SilicoDArT	TGCAGTACATATCCGTGTAGTGGTTTCGTCTCTTATTAGAAAAGCTGGAGAAAACCACCGAGATCGGAA	1R	134.14
100010788|F|0--65:G>T	SNP	TGCAGGCCAGTTAAGCTATCATATTAATTCAATCAGCAGCGCAACAGCCATCAATTCGATGCGTGGAAG	1R	134.7
100012656|F|0--15:A>G	SNP	TGCAGACAGGGCAAAAACCATCCTTGCTCTGGCCTCCCCTGACTCCAAGCCCAGTGATCTCAGAAGGCC	1R	134.7
100012656|F|0--18:C>T	SNP	TGCAGACAGGGCAAAAACCATCCTTGCTCTGGCCTCCCCTGACTCCAAGCCCAGTGATCTCAGAAGGCC	1R	134.7
100014486|F|0	SilicoDArT	TGCAGTTGTCGTCCGCGTCCTCATTTTAAAATCCGAATCATGAGATGCGTTACTGAAGAAGGAGACATG	1R	134.7
100022037|F|0--14:G>T	SNP	TGCAGACCAGATCAGAATAACCCTCATTGATGTGCAATGTGCAATGGCAGTCTTTTTGACTGAGTATAT	1R	134.7
100022037|F|0--60:T>C	SNP	TGCAGACCAGATCAGAATAACCCTCATTGATGTGCAATGTGCAATGGCAGTCTTTTTGACTGAGTATAT	1R	134.7
c8711_3345	SNPe		1R	134.7
100017155|F|0--10:A>T	SNP	TGCAGTTAACATCCCTTTCCTTCCCGCCGTTTTTCTGCACGCATTTGCGGATTTTCTCCAGTAACCGAG	1R	135.27
100027904|F|0--51:A>C	SNP	TGCAGCACGTCCGAGAAGCTGAGCTTGTCCAAGGACACCTGGCCGTGCGGCACACCCTGAGGCAGCGGC	1R	135.27
100034616|F|0	SilicoDArT	TGCAGAATTACTCGCTCCAAGTCATCCTCGCCCGCGCTGGATCCTGCTCCAGCGACTGAGCCGCAATCT	1R	135.27
c9485_1339	SNPe		1R	135.27
100002396|F|0	SilicoDArT	TGCAGAGCTTGTTTTGCTGGCAAGCCTCAGCAATGTGCCATCAGCAATTTGTGCCCTACCAATTTGGCC	1R	135.83
100003919|F|0	SilicoDArT	TGCAGTCGTCCATGCCCATGGCTCAACTGGTAAGACTCAATGATCAACTGCATGCAAAGTCAATTAAGA	1R	135.83
100011141|F|0	SilicoDArT	TGCAGTTAAAAACATCCCTATTCCTACAGTCCTTCCTACGAGAAACGCCAACAGTACGTACAGGCCCTC	1R	135.83
100011771|F|0	SilicoDArT	TGCAGGGACACCTGGCGCTCCATCTGGATGTGCTTGTAGAAGTTGGCGATGAACTGCTCCGCGCGCCGA	1R	135.83
100012104|F|0	SilicoDArT	TGCAGCCGTCCATGCCGATGGCTCAACTGGTAAGACTCAATGATCAACATTAAGAGAAGGACATTTTGA	1R	135.83
100015202|F|0--25:C>A	SNP	TGCAGTTGGGACGCATCTAGTCGAGCTACTCATAAACCCCCACGGTCAAACCGATCAATTCAGAAACCC	1R	135.83
100016082|F|0	SilicoDArT	TGCAGCTACTTCGCTGCGTTAACTAGCAATCAACTAATGATAACGGGCAGAAGGGAAGATATACACCGA	1R	135.83
100016913|F|0	SilicoDArT	TGCAGCCCCAGGCACTACAGCCTTCACTGCATGAACCCCGCAAGCTTATTCCACCGAACCCGAGATCGG	1R	135.83
100019259|F|0	SilicoDArT	TGCAGTACTTGGCTAAACCTGTTTAAATTTCAGCTGTTTTTGCTTGATTTTTCAAGACGTAGCGTCGCA	1R	135.83
100020692|F|0	SilicoDArT	TGCAGAACTAGAATTCATCTAACTAACTGTGGAACTGCGAGACGTGGGCCTTGATGATCTGGTCGGCGA	1R	135.83
100023232|F|0--44:A>T	SNP	TGCAGACCATCAACGGCCCCAACTCCGACTTCCCCGTCTACTCGACGGAGCTCAAGAAGGTCAAGGGCA	1R	135.83
100025530|F|0	SilicoDArT	TGCAGCTATCAGCAAAATACTTGTACCAGTATCATGTGACCGCCCAAAGAAAGAAAAGAAAGTCTACAA	1R	135.83
100028627|F|0	SilicoDArT	TGCAGGGCGCACCTATGTCTCTTTTGTTCAACGAGTCGAGTTTCCGACTCGCTGAAGCGACTCCCAGTA	1R	135.83
100036181|F|0	SilicoDArT	TGCAGTGTTCTTCAGTATATTTCCATGAAGATTTGAGGCAATTCGTCTATATCAGTTCAACAAAAAATT	1R	135.83
100036867|F|0	SilicoDArT	TGCAGATGCAGCCAACTGATGTGTGAGCGTGTGCAACTGAAAAATGAAAATGAAAAAATAGAGATGCGC	1R	135.83
100039937|F|0	SilicoDArT	TGCAGCCAACCAAAAGCAATGACGCCGAGGGAAATCCTCCGCCGAGCCTCATTTAATTCGTACTATGCA	1R	135.83
100040320|F|0--24:G>C	SNP	TGCAGACCAGACCGCGCGCCGCACGATATGCATACCGAGATCGGAAGAGCGGTTCAGCAGGAATGCCGA	1R	135.83
100043599|F|0--28:A>G	SNP	TGCAGCCGCGCCCTGCTCTGCACCCTGGACTTGCTGAAGTCCTCGGCCAGGATGTCCACGAGCGCCATG	1R	135.83
100044952|F|0	SilicoDArT	TGCAGCCGTGCGAGGCGAGCGAGAGCGAGAGCGAAGCAAAGCACCGAGATCGGAAGAGCGGTTCAGCAG	1R	135.83
100044952|F|0--13:G>C	SNP	TGCAGCCGTGCGAGGCGAGCGAGAGCGAGAGCGAAGCAAAGCACCGAGATCGGAAGAGCGGTTCAGCAG	1R	135.83
100047804|F|0	SilicoDArT	TGCAGGGAAGCACCACCCAGGACGAGCAGCCGCAGTACTCCGAGATCGGAAGAGCGGTTCAGCAGGAAT	1R	135.83
100053975|F|0	SilicoDArT	TGCAGATCGGGCGAGTCTTGGGGATATCATTTGGATATGGCTACATATAGATACTGGAATTTTTCCTCT	1R	135.83
100054457|F|0--45:G>A	SNP	TGCAGAGCTAGCAAGCATCACGCGGTTTGGAGTTCGACTCCCATCGCCTGCGCTTTTCTTTTTTCGATT	1R	135.83
100055296|F|0--48:G>A	SNP	TGCAGCACAAAGCACCGAGGCAGACCAGCTTCCCGTTCCTGACATCTCGAGGCTGCCAAGCACTGTTTC	1R	135.83
100058053|F|0--15:T>G	SNP	TGCAGCAGCCAGTCCTCGAGCTCGCTCTTGGGGCAATCTGACATAGGTGGGATCGCCACCGAAGCCCCC	1R	135.83
100059259|F|0	SilicoDArT	TGCAGCGGCTCCCCGTCAAATCCGTCCTGCGCTTCCGAGATCGGAAGAGCGGTTCAGCAGGAATGCCGA	1R	135.83
100059673|F|0--13:G>C	SNP	TGCAGTGCCATGGGGCCAACGACGCGTCGAGCGACGCGCTCTCCGAGATCGGAAGAGCGGTTCAGCAGG	1R	135.83
100062271|F|0	SilicoDArT	TGCAGCCAGACGCTCCCCACCAGGCTCAGCCAGTGCACTGAGGTCGGAGACGACGGCATGATTTTTTTC	1R	135.83
100064539|F|0	SilicoDArT	TGCAGCTCCATGCTAATCCCTACGACTACGAGCAAGAGACGATTATTTTAGCTGGTGGTAAGAGGTCTG	1R	135.83
100064950|F|0	SilicoDArT	TGCAGCCAGACGCTCCCCACCAGGCTCAGCCAGTGTACTGAGGTCGGAGACGGCATGATTTTTTCTTCC	1R	135.83
100069922|F|0	SilicoDArT	TGCAGCGCAGCCCACGAACTGATTTCCGCATTCGGTATGGTCGTACAGGGTACAGCCTGCGACGTTTTG	1R	135.83
100069922|F|0--20:G>T	SNP	TGCAGCGCAGCCCACGAACTGATTTCCGCATTCGGTATGGTCGTACAGGGTACAGCCTGCGACGTTTTG	1R	135.83
100071335|F|0--10:G>C	SNP	TGCAGGAGAGGTCGCCTCCCCGCAGGGTTTCTTGACCGATCTGATCCCCGAGATCGGAAGAGCGGTTCA	1R	135.83
100075960|F|0	SilicoDArT	TGCAGGCACCCCCGACCCCTCGTCGCTTTGTTCTTTCCTGTCCTAGCTAGTAAGTACGTCGGTCATGTT	1R	135.83
100098699|F|0	SilicoDArT	TGCAGGTTCACACAACAGGTTTGGCTACTGTTCAGAGATTGGACACGGGCGGATTTTCAGGTACCGAGA	1R	135.83
100116206|F|0	SilicoDArT	TGCAGTTGCAGCTCCTGGCCAGCAGATTCACAAACCGAGATCGGAAGAGCGGTTCAGCAGGAATGCCGA	1R	135.83
100122175|F|0	SilicoDArT	TGCAGCCTTCCGTTGCCCTGCACCCTAGGGTTCATGAAGTCTTCGGCGAGAAGGTCGACGAGGGCCATG	1R	135.83
100147582|F|0	SilicoDArT	TGCAGTTTTGAGAATTTTATTCGTGGATCAGGAAATTATAATTTGTGACTTTGTATTTTTCAGGTAATT	1R	135.83
c11689_884	SNPe		1R	135.83
3732133|F|0--10:A>G	SNP	TGCAGCAGCCAGTCCTCGAGCTCGCTCTTGGGGCAATCTGACATAGGTGGGATCGCCACCGAAGCCCCC	1R	135.83
3741016|F|0--26:T>G	SNP	TGCAGATCGGGCGAGTCTTGGGGATATCATTTGGATATGGCTACATATAGATACTGGAATTTTTCCTCT	1R	135.83
3746100|F|0--19:A>G	SNP	TGCAGCGGCTCCCCGTCAAATCCGTCCTGCGCTTCCGAGATCGGAAGAGCGGTTCAGCAGGAATGCCGA	1R	135.83
100025530|F|0--14:A>G	SNP	TGCAGCTATCAGCAAAATACTTGTACCAGTATCATGTGACCGCCCAAAGAAAGAAAAGAAAGTCTACAA	1R	135.83
100029283|F|0	SilicoDArT	TGCAGGGAAGCACCAACCAGGACGAGCAGCGGCAATACTCCGAGATCGGAAGAGCGGTTCAGCAGGAAT	1R	136.39
100064430|F|0	SilicoDArT	TGCAGAACGTAGTTTCTCTATTCCGACCGTCTCGAAATCTACATGGGAAGCACAAGCTCGGAGTTTAGG	1R	136.39
100095541|F|0	SilicoDArT	TGCAGGAGGCCGCTCCCCGCCGCCGTCCCGGCCATCACTCCCCCGCCGTCCTACCACGCGCGGACCGCC	1R	136.39
100095541|F|0--38:T>C	SNP	TGCAGGAGGCCGCTCCCCGCCGCCGTCCCGGCCATCACTCCCCCGCCGTCCTACCACGCGCGGACCGCC	1R	136.39
100142474|F|0	SilicoDArT	TGCAGCTGCTGATCCCGCATGCCCGCGTACGAATACGACGGGTTGCCGAACCCGAGATCGGAAGAGCGG	1R	136.39
100000372|F|0	SilicoDArT	TGCAGCATGAATATGATCTGATAAACTTGAAATTTGTACTGAACCGAGATCGGAAGAGCGGTTCAGCAG	1R	136.95
100011758|F|0	SilicoDArT	TGCAGCCGTCAGGTGCTGCTCATCGTTTACTGGCCCGTACGTGGCGTTCACATCACAGGCAAAACTACC	1R	136.95
100023739|F|0--35:T>C	SNP	TGCAGGTCGATGGATTATTTAGATAGATTCCGTAATAATAATAATATAAAAGGTGCTTGCCGAGATCGG	1R	136.95
100026858|F|0	SilicoDArT	TGCAGCATGAATATGATCTGATGAACTTGAAATTTGTTCCACAGGGCACCGAGATCGGAAGAGCGGTTC	1R	136.95
100051338|F|0	SilicoDArT	TGCAGATGAAGCAGTTGAATGCTGAAAAAGACAAGCACAGGAAGACGGTCGAGGATTCGAAGCTCGATA	1R	136.95
100076812|F|0--11:C>T	SNP	TGCAGGAGTCGCCGCCTTTCTCAAGTTGAATAAACGGCGAGAATGTCCGAGATCGGAAGAGCGGTTCAG	1R	136.95
100076812|F|0--30:T>A	SNP	TGCAGGAGTCGCCGCCTTTCTCAAGTTGAATAAACGGCGAGAATGTCCGAGATCGGAAGAGCGGTTCAG	1R	136.95
c5686_927	SNPe		1R	137.51
100002701|F|0	SilicoDArT	TGCAGTCTTCAGGAGCCCACACCAAGGTTTTGCCTGTTCAAACCTTAATTGGGCGTCGATCCTTAAAGC	1R	139.24
100016471|F|0	SilicoDArT	TGCAGAACAACAACACTAAAGCTATTGGAACAGAGGAATGGCATCAAAATCCATGAACTCGCTAACGCA	1R	139.24
100017345|F|0	SilicoDArT	TGCAGCCAAATACTGCTCCTTGTTTACTACAACTAACCGAGATCGGAAGAGCGGTTCAGCAGGAATGCC	1R	139.24
100017614|F|0	SilicoDArT	TGCAGCCAAATACTGCTCCTTGTTTATTACCACTAACTGGTAACCAAGTTGCAGTCTTGGTGATAACAA	1R	139.24
100017614|F|0--26:T>C	SNP	TGCAGCCAAATACTGCTCCTTGTTTATTACCACTAACTGGTAACCAAGTTGCAGTCTTGGTGATAACAA	1R	139.24
100017945|F|0	SilicoDArT	TGCAGTAGTAAATGGGGCCTGTGCCAATCTGGACGTGGTCTGCCACCCACGTTGTCGCCCACTTGTTGC	1R	139.24
100039195|F|0	SilicoDArT	TGCAGAGGCTTTCAAGGGCCAACACAACATGGCGCCGCCGCCCGCGCCTCGCCGAGATCGGAAGAGCGG	1R	139.24
100051322|F|0	SilicoDArT	TGCAGCATGGAGACGGACGAGACTAGAGCCGTGGAGATGTTGCTCACGTTGTCCAGCGCTGCGTTGCGG	1R	139.24
100051518|F|0	SilicoDArT	TGCAGGGTACGTACGCACGCACAGTAGAACGTTCCATAGTGGGAGTATCTTGTGAAATCGCATCACGGC	1R	139.24
100055231|F|0	SilicoDArT	TGCAGGGCACGTACGTCGTACAGTAGATACTCCATCGACTCATGGAGTATCTTGTGGCATCGCATCACG	1R	139.24
100078458|F|0	SilicoDArT	TGCAGAGGCTTTCAAGGGCCAACATGGCATTGGCGCCGCCGCCCGCGCCTCGCCGAGATCGGAAGAGCG	1R	139.24
3353245|F|0--24:C>T	SNP	TGCAGAGGCTTTCAAGGGCCAACACAACATGGCGCCGCCGCCCGCGCCTCGCCGAGATCGGAAGAGCGG	1R	139.24
100003490|F|0	SilicoDArT	TGCAGCATCTCCGCCATCCTAGATCGATTGGTTGATTGTGACATGTGCTGTGCTTGACAGGAGCTGGAC	1R	139.79
100003490|F|0--30:G>A	SNP	TGCAGCATCTCCGCCATCCTAGATCGATTGGTTGATTGTGACATGTGCTGTGCTTGACAGGAGCTGGAC	1R	139.79
100006990|F|0	SilicoDArT	TGCAGCAGCTTGATGCGCGCCGCGTTCAGCTCCATCGAGTACTCGCTGCATGCATGCATGCATCATGCT	1R	139.79
100007480|F|0	SilicoDArT	TGCAGCAAAACTGTCTGTACGAGACCACAGTGCAATCAACGTATGGTTTGTCCCTCCAGCTACAGATAA	1R	139.79
100011132|F|0	SilicoDArT	TGCAGTGTATATAAACAGAAAGAAAAGCAGACTTATACGCTCGATCATAGCTTCGGAACCGAGATCGGA	1R	139.79
100011385|F|0	SilicoDArT	TGCAGTTTACGAAATATCAACAGAGATTCCATGCTACCCGCCGATGCAGATGCAGGAATCCCCAACGGT	1R	139.79
100019138|F|0	SilicoDArT	TGCAGCAGGCAGCGGCACACTAGGCCTAGCACCAGCCGTTCGCGATCTGGCATCGCACAACCAGGGGCC	1R	139.79
100019376|F|0	SilicoDArT	TGCAGTTTACGAAATATCAACAGAGATTCCATACCACCCGCCGATGCAGATGCAGGAATCCCCAACGGT	1R	139.79
100027985|F|0	SilicoDArT	TGCAGCTCCAGCTCGATCTTTGCCTTTGCCCCTCGCACGGCTGGACCTGACAAGATCAGCCCGAGATCG	1R	139.79
100027985|F|0--57:A>G	SNP	TGCAGCTCCAGCTCGATCTTTGCCTTTGCCCCTCGCACGGCTGGACCTGACAAGATCAGCCCGAGATCG	1R	139.79
100032296|F|0	SilicoDArT	TGCAGCTCTAACGCGTCCCAGTTTACGTGTCTCGGATTAGAAAGCATCTCATCCTCCGTGCCGTGCGTA	1R	139.79
100032296|F|0--26:G>A	SNP	TGCAGCTCTAACGCGTCCCAGTTTACGTGTCTCGGATTAGAAAGCATCTCATCCTCCGTGCCGTGCGTA	1R	139.79
100032296|F|0--65:C>T	SNP	TGCAGCTCTAACGCGTCCCAGTTTACGTGTCTCGGATTAGAAAGCATCTCATCCTCCGTGCCGTGCGTA	1R	139.79
100034463|F|0	SilicoDArT	TGCAGACGCCCGATTGTATGCATTTCGCAAACTGGCGCCTGCGGCGCCCTGTACTGGGCCGAGATCGGA	1R	139.79
100035851|F|0--47:A>G	SNP	TGCAGCTGTATGTTGCGGAAGCGCTCCTGCGCGGAGTTCATGGCGAAAGAGCGTTCCCGAGATCGGAAG	1R	139.79
100038405|F|0	SilicoDArT	TGCAGTATCATGTTCTGTCATAATTTTTTGTTTTCCGTTTAGCAAAAAAAGGTCATCCGAGATCGGAAG	1R	139.79
100053404|F|0--26:A>G	SNP	TGCAGGGGTGGCCGAAACGGATAGCCACAAGATCGGGTCAAGAACGCACGCGCGCTGACCGCATGCGGG	1R	139.79
100053684|F|0	SilicoDArT	TGCAGCTCTAACGCGTCCCAGTTTACGTGTCTCGGATTAGAAAGCATCTCGTTCCTCCGTGCCGTGCGT	1R	139.79
100058198|F|0	SilicoDArT	TGCAGCAGGACCGCGCATTATGCAACACTACCACAGACGGGTTATGACGGATGGGGGCATGGCATCCGA	1R	139.79
100068920|F|0	SilicoDArT	TGCAGCAGGACCGCGCATTATGCAACACTACTACAGATGGGTGGGGCATCCGAGATCGGAAGAGCGGTT	1R	139.79
100070996|F|0	SilicoDArT	TGCAGGGGAAAAGGGAGCAAGAGAAGGCAAGCAAGCACCTATGTGGCCGATGAAGGCGGTGTCGACGAG	1R	139.79
100073819|F|0	SilicoDArT	TGCAGAGAAGAGAGCTTCAGAGACGGCGGAAGCTGCTGGTTCCCCAGGTGCATGCTCCCTGCAAGACGG	1R	139.79
100078799|F|0	SilicoDArT	TGCAGCGACTTCTTGAGCTCGGTGAAAAGGTCACCCCAGCCATCGGTGCCCGTGTCGCTGACCACGGTC	1R	139.79
100081629|F|0	SilicoDArT	TGCAGCTCCAGCTCGATCTTTGCCTTTAGCCCCTCGCACGGCTGGACCTAACAAGATCGGCCCGAGATC	1R	139.79
100085329|F|0	SilicoDArT	TGCAGGCGCAGGAGGACGTGGTGGCGGAGATGAAGGAGAACGCGGGCAAGGCGCTGCTCCGCGTCACCA	1R	139.79
100096151|F|0	SilicoDArT	TGCAGCGGGGACAGAGGAACAGAGGAGCGTCAGAGGAGATCGAGCCGACGGAAAACCCGCCGCATTGGG	1R	139.79
100109431|F|0	SilicoDArT	TGCAGTCAAAACTCAGTTGTAGTCTTGTAGCCGAGATCGAAAGAGCGGTTCAGCAGGAATGCCGAGACC	1R	139.79
100115268|F|0	SilicoDArT	TGCAGACTGTCAGATAAAAGAAGGCGGTCGCTTCCGAGATCGAAAGAGCGGTTCAGCAGGAATGCCGAG	1R	139.79
100125185|F|0	SilicoDArT	TGCAGACTGTCAGATAAAAGAAGGCGGTCGCTTCCGAGATCGGAAAAGCGGTTCAGCAGGAATGCCGAG	1R	139.79
100132861|F|0	SilicoDArT	TGCAGCGGGGACAGATGAACATAGGAGCGTCAGAGGAGATCGAGCCGACGGGAAACCCGCCGCATTGGG	1R	139.79
100137080|F|0	SilicoDArT	TGCAGACTGTCAGATAAAAGAAGGCGGTCGCTTCCGAGATCGGAAGAGCAGTTCAGCAGGAATGCCGAG	1R	139.79
100146414|F|0	SilicoDArT	TGCAGACTGTCAGATAAAAGAAGGCGGTCACTTCCGAGATCGGAAGAGCGCTTCAGCAGGAATGCCGAG	1R	139.79
c1603_444	SNPe		1R	139.79
rPt-389363	DArT		1R	139.79
3356028|F|0--23:C>G	SNP	TGCAGCTCCAGCTCGATCTTTGCCTTTGCCCCTCGCACGGCTGGACCTGACAAGATCAGCCCGAGATCG	1R	139.79
3360838|F|0--32:G>A	SNP	TGCAGTTTACGAAATATCAACAGAGATTCCATGCTACCCGCCGATGCAGATGCAGGAATCCCCAACGGT	1R	139.79
100018497|F|0--34:A>T	SNP	TGCAGAGAGTATCACCAGTCAATAGATCGAATCGATGATCCACCGCCGTTCTAATGCATTCTAAGCGCT	1R	140.37
100001799|F|0	SilicoDArT	TGCAGCCCTGTTTCCCTCAGATGCAGAGAAGACGGGCAGCAAATAATAGTTTCACTGCTTGGAGCATTC	1R	140.95
100001799|F|0--60:G>A	SNP	TGCAGCCCTGTTTCCCTCAGATGCAGAGAAGACGGGCAGCAAATAATAGTTTCACTGCTTGGAGCATTC	1R	140.95
100005579|F|0	SilicoDArT	TGCAGAGTCCTGTCTCAGGCAATTACCATAGGCATATCCGCCCCGAGATCGGAAGAGCGGTTCAGCAGG	1R	140.95
100006820|F|0	SilicoDArT	TGCAGCCCTGTTTCCCTCAGATGCAGAGAAGACGGGCAGCAAATACGTAATAGTTTCACTGCTTAGAGC	1R	140.95
100006885|F|0	SilicoDArT	TGCAGTGTGGTAAATACAAAGGGCAAGCAATGTCATTAGAAAGAGGAAACCAACACTACATGTGGTTTC	1R	140.95
100015773|F|0	SilicoDArT	TGCAGACATTGCGGGGCGTGCATGCAACAAACATGGAAACATGCACATTGATCGACCCTGACACGACCG	1R	140.95
100016554|F|0	SilicoDArT	TGCAGGAAGAATAGAAGAACGCATGGTACCTTTTTCCTTTTTGCATCAATGAATCTATAGGAATCCATT	1R	140.95
100020713|F|0	SilicoDArT	TGCAGTGTGGTACAGACACATGCTCAAACCAGTGATTGAATCTGAATCTGAAGCTCCCATACAGACAAT	1R	140.95
100022257|F|0	SilicoDArT	TGCAGCGCGTTGGCCTCGCGCATGGCGTCGCCGTAGGTCCGAGATCGGAAGAGCGGTTCAGCAGGAATG	1R	140.95
100024316|F|0	SilicoDArT	TGCAGCAGCAGAAGCAAGCCATGTGCTCAACAAAAGGGGGCAAAAGCCAACCGAAGCAAAGCGAGCAAG	1R	140.95
100028168|F|0	SilicoDArT	TGCAGTGGTGGGACACGACGAGGGTGGCAACCTCCATGGATTCATGACTGTAGCAAGCAACTGGTTGGG	1R	140.95
100028915|F|0	SilicoDArT	TGCAGTACTAGCGCACAGACTAGAGACGGAGAAAGCATGTCCATTCATTCACGCGACAGATTTTTTATC	1R	140.95
100029773|F|0	SilicoDArT	TGCAGAGCGGCGCCTTCATCTACCAGCCATGGTGGCCTCCTCCATCCCGAGATCGGAAGAGCGGTTCAG	1R	140.95
100046630|F|0	SilicoDArT	TGCAGAGGCTGCTCAGGAAGAGGCAGCAGTCCATGGTAGCCCAGGTCGCCGCCCTGTACCCTGTCAGGG	1R	140.95
100046630|F|0--18:A>C	SNP	TGCAGAGGCTGCTCAGGAAGAGGCAGCAGTCCATGGTAGCCCAGGTCGCCGCCCTGTACCCTGTCAGGG	1R	140.95
100060611|F|0	SilicoDArT	TGCAGATCCCCAAGCCGCGCCTTCTCCGCGGATTTCAACTCTTTGGCTTCCTGCGATCAATCATGACAT	1R	140.95
100073385|F|0	SilicoDArT	TGCAGCATGATGCAGTGTCGTGTGGCTCCCATGTTAGACGCAACGGAAGGATCAGCCCCGCGGCCGAGA	1R	140.95
100102895|F|0	SilicoDArT	TGCAGTGCACTGGATCAAGCGACAACTGCCGTTATTTTTCATCAGCATCGCCAGCGGCGCCCGCGTCCA	1R	140.95
100109905|F|0	SilicoDArT	TGCAGGTGGTGGAGGAGGAGGAGGAGGCGCACGGTCGAGGGCACGGCGGCCATTACCTAGGCCGAGATC	1R	140.95
c17438_931	SNPe		1R	140.95
rPt-402630	DArT	nnccagtgcagcatcaacggcagggttggtcatcacggcaacgaggccccccgggtcaacgccatccagccacttcttgcgcgtgtagtgcacaccctgccgcacagcagtctgccaccccactcggccgttcttgaccacgatgcggtacacgccgccgtcgccaacgacaccggcgccttgcacttcactggacccgggctagcagtgcaggctgctctcgcttcagctcggttgggtcatcggtgcagtacgcagggacttgcgaggacaatgggcatgcagttccctggggtgcgtgggagttcggtttcagttttgcgacgctgcaatgcggatgcgcgtgccatgcattttacttggttcaccgccatcgtgcacctgtgtgcagtttgttta…	1R	140.95
rPt-507250	DArT	tgcagcatcaccggcagggttggtcatcacggcaacgagaccccccgggtcaacgccatcatgccacctctcgcgcgtgcaatgcacaccttgccacatagcagtctaccaccccactccgccgttctcaaccacggtgcagtacacgccgccgtcgccaacgacaccggcgccttgcagttcattggacccgggctagcagtgcaggctgctctcgcttcagctcggttgggtcatcggtgcagtacgcatggacttgcgaggacaacgggcatgcagttccctgggatgcgtgggagttctgtttcagttttgcgatgctgtagtgcggatgcgcgtggcatgcattttacttgattcaccgccatcgtgcacctgtgtgtagtttgcttagttttc…	1R	140.95
Xscm177.392	STS		1R	140.95
100001175|F|0	SilicoDArT	TGCAGCTTGCACGTACGGACGCATGTTGTTGCATCGAACAATGTTTGGATTTGGCCGAGATCGGAAGAG	1R	141.52
100001962|F|0	SilicoDArT	TGCAGCCGACGATAGCACATGGGCTACTGATTCCACGAAAAATCAAGCTGCGCTATCATTAACCAAGTC	1R	141.52
100008441|F|0--42:T>C	SNP	TGCAGTTGGAGATTTGAACCATCTGATCTCTGCCACCATGAGTGGAGTGACCTGCTGCCTGAGGTTCCC	1R	141.52
100008686|F|0	SilicoDArT	TGCAGGGCAAAAACCGAGATTTGCACAAAGCCCCTAAATTCCAAGATAATACGAAGCCCAACAGGAAGA	1R	141.52
100011293|F|0--28:A>G	SNP	TGCAGAAGTAATTTAGGATGTGACATATATTGATTGCTCAATAGCCAGTAGTAGCTAGTATTTTGTGTA	1R	141.52
100012568|F|0	SilicoDArT	TGCAGCCGAAAGCCTGAACCCCACGATTACAGTTGCCAGCATATACCATCACCACCACCGCCAAAGATT	1R	141.52
100013176|F|0	SilicoDArT	TGCAGTTTTAGGTGTCATTTTCTTCAGCACATGGTCACGGGATCAGACTGTAGAAGAATACATCAGTTA	1R	141.52
100013429|F|0	SilicoDArT	TGCAGTAGTAGTACAGTATGGGAAATGATTGATACAGCTAGATTTCTTTACTCAAAACAAAACAAGATC	1R	141.52
100014798|F|0	SilicoDArT	TGCAGCATAGCCAGACACCATAGCCCTCTTCTATATAAGAAACTCAAGTTCTCACAGGATTTTCCGAGA	1R	141.52
100015518|F|0	SilicoDArT	TGCAGCACGCCAGTGGTTCAGAATTTTGAATATTCAGAAACCATTAGTACTATATACGTACCCGCTGTT	1R	141.52
100015837|F|0	SilicoDArT	TGCAGAAGTAATTTAGGATGTGACATATGTTGATTGCTCAATAGCCAGAAGTAGCTAGTATTTTGTGTT	1R	141.52
100016030|F|0	SilicoDArT	TGCAGCCAAGCACGCCCAGGGCAAGTAGGCAACGCAGCGAATAGACTCCCTCGATCAAGCGGCAACCTG	1R	141.52
100017326|F|0	SilicoDArT	TGCAGTATGTGGGTCCTGCTTACCCTGTATATCTATGTTTTCAGAGAGAAGATGAGGGAGATCCTCCAC	1R	141.52
100017326|F|0--11:G>A	SNP	TGCAGTATGTGGGTCCTGCTTACCCTGTATATCTATGTTTTCAGAGAGAAGATGAGGGAGATCCTCCAC	1R	141.52
100017977|F|0	SilicoDArT	TGCAGTGACCAGGATCAGTTTCCATGTTGTAAACACAATAGCCTTGGCCAGCTTGACCGCCGTAGCGCC	1R	141.52
100017977|F|0--9:C>G	SNP	TGCAGTGACCAGGATCAGTTTCCATGTTGTAAACACAATAGCCTTGGCCAGCTTGACCGCCGTAGCGCC	1R	141.52
100019988|F|0	SilicoDArT	TGCAGTGCTGCGTGCCTATCCTACCACGATATTCAAGTGGCCCAACGGCCAGTCCTTGTTTCCAACTGC	1R	141.52
100023517|F|0	SilicoDArT	TGCAGAAGTAATTTAGGATGTGACATATGTTGATTGCTCAGTAGCCAGTAGTAGCTAGTAGTATTTTGT	1R	141.52
100027723|F|0	SilicoDArT	TGCAGTATGTGAGTCCTGCTTACCCTGTATTTCTATGATTTCAGAGAGAAGATGAGGGAGATCCTCCAC	1R	141.52
100028237|F|0	SilicoDArT	TGCAGGCGAGACAAAGCATCAACCCTCCTTCATGGGCGCGCTCTATTTGTGCGCTAGGGCTATACCTCG	1R	141.52
100038593|F|0	SilicoDArT	TGCAGGTGGACATGGGCTGCCCGTGCCCGCGGCACCCACGACCAAGCCCACAAAAATTGCCCTCGTGGA	1R	141.52
100110190|F|0	SilicoDArT	TGCAGGTCAGAGGTGCCGACATACCGCCCGAGATCGAAAGAGCGGTTCAGCAGGAATGCCGAGACCGAT	1R	141.52
100118370|F|0	SilicoDArT	TGCAGGTCAGAGGTGCCGACATACCGCCCGAGATCGGAAAAGCGGTTCAGCAGGAATGCCGAGACCGAT	1R	141.52
100147165|F|0	SilicoDArT	TGCAGCAGTAGTACAGCGTGCGAAATGATTGATACAGCTAGATTTCTTCACTCAAAACAAAACAAGATC	1R	141.52
c10013_747	SNPe		1R	141.52
TC3661-1R	STS		1R	141.52
100002300|F|0	SilicoDArT	TGCAGTATTAACTGGAGTAACTATTATTCATCCCCGAGTTAAACCGAGATCGGAAGAGCGGTTCAGCAG	1R	142.07
100004255|F|0	SilicoDArT	TGCAGCTATATATCAATCAAGAAATATCAAAACGTCCAAAGCTCTACTACTTTGCATCCGAGATCGGAA	1R	142.07
100005074|F|0	SilicoDArT	TGCAGCAATTCCTGATTAGTAGAGTTCGGTACAAACACTTGTACTGCCTTATCGTATATCCGAGATCGG	1R	142.07
100012157|F|0	SilicoDArT	TGCAGAAACAAAACCCCCAAATAATCATTGAGCTGAGCACATTCATTCAGCTAGGGAAGCAGAGCTCAA	1R	142.07
100027191|F|0	SilicoDArT	TGCAGCCCAACCCGCGCAGCAGCAGCAGCCAATCCAGCTCGTTAGCAATAGGGGCGTCGTCTCCCCTGT	1R	142.07
100060084|F|0	SilicoDArT	TGCAGCGACGAGCGCGGAGTCCGCCATATATGGGAGTTCCTGGTCAACGCAGAGCCAGATGCGAAGGGA	1R	142.07
100062367|F|0	SilicoDArT	TGCAGTGCAGTGCAGTGCAGTGCAGTGCAGTGCAGGCTCCGAGATCGGAAGAGCGGTTCAGCAGGAATG	1R	142.07
100133996|F|0	SilicoDArT	TGCAGCCGAGGTGGATGGGCGGGCCGCGCACGTCGTAGGTGCCCCGAGATCGGAAGAGCGGTTCAGCAG	1R	142.07
100144136|F|0	SilicoDArT	TGCAGCCGAAGTGGATGGGTGGGCCGCGCACGTCGTAGGTGCTCCGAGATCGGAAGAGCGGTTCAGCAG	1R	142.07
c921_3806	SNPe		1R	142.07
rPt-508252	DArT		1R	142.07
100015357|F|0	SilicoDArT	TGCAGCTAAAGACGACGACATTCCTCTAACCATGTGCATCGATCCGTAACATATAGTATTTCATGTACT	1R	142.63
100017199|F|0	SilicoDArT	TGCAGCTAAAGACGACGACATTCCTCTAACCATGTGCATCGATCCGTAACATATAGTATTTCATGTGTA	1R	142.63
100020135|F|0	SilicoDArT	TGCAGGTATTACAAATGATGAGATCTTATCCTGTGTCACTCCATCTGTTACCCATGAGATGAATGCAAG	1R	142.63
100021306|F|0	SilicoDArT	TGCAGGACTTGGTGTTCAAAATCACGGAGTATCGGGCCAGCTAGGCATCAGGACTGATGTGTCTGCCAT	1R	142.63
100022316|F|0	SilicoDArT	TGCAGACGCATCTCCAATATTAATTTGTCAAGAAATCACCACGACTCGTGTTGCCTTCATCCTTTCCTG	1R	142.63
100023474|F|0	SilicoDArT	TGCAGGAACTAAGAAACTAAACTGGGAGGGATTTAGTAATTTATTATCCAAACGCAGATCGCAGGTTCC	1R	142.63
100027281|F|0	SilicoDArT	TGCAGCAGCGTGGCGACGCGTTGGGAAGAGGCGCACATTCATCACGTTACGCGTTCAGTGCACTGTTGA	1R	142.63
100028472|F|0	SilicoDArT	TGCAGAAGACATAAACAGATTTCTGTAGTGGTTAGCAATAAATTTCTTCAACTCCTCTTCTCCTTCCAC	1R	142.63
100030038|F|0	SilicoDArT	TGCAGGCTACATTAACAGAAGAATCGGCAAACCGTCAAAACTCGCAACATTGCTACATAAATAAGGCTG	1R	142.63
100042233|F|0--68:G>C	SNP	TGCAGCTGGCTAGCTACTCTCGGTTGGTGAGCGTGCGCATCGCATTCGCACGGGCGCGTTCTCCAGGGG	1R	142.63
100106712|F|0	SilicoDArT	TGCAGCAGCGCGCAGAAGACGCTCCCCCAGGCCCCCGCGCCCACACCGAGATCGGAAGAGCGGTTCAGC	1R	142.63
100147162|F|0	SilicoDArT	TGCAGATATGGGTGGCTTCTGCCCGAGTATAACTGCGGTTAAATATGGAAATAAATCCAGTTTATATGC	1R	142.63
100147182|F|0	SilicoDArT	TGCAGTTTGTGTAGCTATGGATGTCCGTGGTCAAACATGTGCCTACAGTTTCTACACATGACCTTTAGT	1R	142.63
c8331_818	SNPe		1R	142.63
SCPgk_1-1R	STS		1R	142.63
3360123|F|0--13:G>C	SNP	TGCAGATATGGGTGGCTTCTGCCCGAGTATAACTGCGGTTAAATATGGAAATAAATCCAGTTTATATGC	1R	142.63
c26456_212	SNPe		1R	143.2
100012451|F|0	SilicoDArT	TGCAGTGAAACCGTCCACACCAGGAGCTTTCGAAGGCACCATCTGAAACAACGCCAATTTGACCTCCTC	1R	143.76
100001791|F|0	SilicoDArT	TGCAGTCTGCACGTGTAGCATCCATTCAAGTTTACTCCAATAAACAACAGATAGCTGCCACCGAGATCG	1R	144.32
100003649|F|0	SilicoDArT	TGCAGAGGAGAACTTGATGATAGCTCTCAATTCGTGGAGAAAAGGCCGAGATCGGAAGAGCGGTTCAGC	1R	144.32
100010466|F|0	SilicoDArT	TGCAGACCAACTACTCCCAATGGGCTTCGAGAATCAGATTCACCACCGAGATCGGAAGAGCGGTTCAGC	1R	144.32
100011433|F|0	SilicoDArT	TGCAGGGGTTTTGCCTCACTTGACATAATCACATCCTGGGCCATCTAGAAACATCGGCACGACATCATC	1R	144.32
100012161|F|0	SilicoDArT	TGCAGGTACAACAAGAGCTCACTTGTCTGAAGAAATCAAGGGGAAGACCAGGAGAGCAACCTGTATGCC	1R	144.32
100012830|F|0	SilicoDArT	TGCAGCCACCGAGGGCGGAGAAGCCAGATCCGACAAAGCCCGACCAAGATCTTTGTTTTCTTCATACCT	1R	144.32
100013851|F|0	SilicoDArT	TGCAGTAAACTTCAGAGCTCAATTATAGTTTAACAAGAGCCGTTTTCACCTAGCTACCACCGTAGTTAA	1R	144.32
100024940|F|0	SilicoDArT	TGCAGACAGTTAATTTCTAGTATAGTCAGTGTACCAGCGTCAGGCAGAGAACTGAGAAGCAATTGAAGA	1R	144.32
100025495|F|0	SilicoDArT	TGCAGGATGAATGGTGTATATTTCCATCAGTAGACCGAGATCGGAAGAGCGGTTCAGCAGGAATGCCGA	1R	144.32
100029894|F|0	SilicoDArT	TGCAGATGGTCTGCGGATTGACACAACACTGCCCGAGTCTCAGCGATCACACCTTTTTTGTTCGTCGAG	1R	144.32
100036070|F|0	SilicoDArT	TGCAGATGGTCTGCGGATTGACACAACACTGCCCGAGTCTCAAGCGATCACACCTTTTTTGTTCGTCGA	1R	144.32
100055936|F|0	SilicoDArT	TGCAGCTAGCATGACGCTGGCGGCCAAGAGCCATGCATCGACCGTGCCGAGATCGGAAGAGCGGTTCAG	1R	144.32
100129482|F|0	SilicoDArT	TGCAGGGCCAGAGCGTGGAGAGCAAGCCCAATGGCTTCCGCGCGGACGCCGAGCTCTGGAACGGCCGCT	1R	144.32
rPt-402055	DArT	tgcagcaaaaataaaaggaaaccaccaaactgagtattgcatcaaccacgaaacaacaatctagaaaggtaatggaattgagAgcatgcccctatgaagctcccatttgaacaattaaaccagcagctccaaaattgtacatcattaaacctcactttctgcaagcaattcatcaagcactccatgagcacaaaaactgaagatataatttaatcaaactttagattcctaatcactgaagtgcacaacaagagtgcatatggatttgagagatctaaacatcaaaatggagtacaacatgagagagttggaaaagagtgggtggaggataagcatacatgcaacagagcatgaatactgcccactgttaccactgatataggaacctccttgacatca…	1R	144.32
rPt-411098	DArT	tcntcctcttatataaggctgatcgttgttgcccaattgggcaatggttgtctcctcttataccaaacgtgacgtgtgttgatcttcttaaataatgcctctcatacatatacttcaaatattggtcagacaagaataggaaagcctataggtacaaaatagataggaaagcctctttaattattacatttatagggtttgatgtcaaggaggttcctatatcagtggtaacagtgggcagtattcatgctctgttgcatgtatgcttatcctccacccactcttttccaactctctcatgttgtactccattttgatgtttagatctctcaaatccatatgcactcttgttgtgcacttcagtgattaggaatctaaagtttgattaaattatatctt…	1R	144.32
3603117|F|0--29:G>C	SNP	TGCAGTCTGCACGTGTAGCATCCATTCAAGTTTACTCCAATAAACAACAGATAGCTGCCACCGAGATCG	1R	144.32
100009417|F|0	SilicoDArT	TGCAGCACGTTACGATCATCAGCCGAACCACCAAACAAACAAGCATCCACAATCACGACAACGAAGGAA	1R	144.88
100011905|F|0	SilicoDArT	TGCAGCACGTTAGGCTCATCAGCCAAACCACCAAACAAACAAACATCCACAATCACGACAGCGAAGGAA	1R	144.88
100002182|F|0--19:G>C	SNP	TGCAGAAGAGCTATCCACTGATCTTCTTCATCCAGCGAGAGGATCGGCCAAGTTGCATTTTCCTAACCG	1R	145.44
100005149|F|0--26:T>C	SNP	TGCAGAATATACTCCTAGGCCCTAGCTACAACCTTCTGGCATTTTCTAACGGGTTCTACAAATGGCATC	1R	146.03
100006314|F|0	SilicoDArT	TGCAGATCTTTGCAATATACGTATTCTCTGCTAATGATGATCCATTTACTCTGCTGGTCGATCAAGCTG	1R	146.03
100007647|F|0	SilicoDArT	TGCAGATCTTTGCAATATATTCTCTGCTAATGATAATCCATTTACGATCGATCAAGCTGGCCGAGATCG	1R	146.03
100023379|F|0--10:C>A	SNP	TGCAGTAGTCCAGTTTGCCACAGTGCATGGTTTCCTGCTTCACTGCATACGCCAGCTAGTTCCATTGTT	1R	146.03
100028816|F|0	SilicoDArT	TGCAGAACCAAAGGAGGACTAAGCATACCACTACCCTTTGTATCCGAGATCGGAAGAGCGGTTCAGCAG	1R	146.03
100073313|F|0	SilicoDArT	TGCAGCTGGACGGGCGTGGAGTGCAGCAGCACTCACCCGAGATCGGAAGAGCGGTTCAGCAGGAATGCC	1R	146.03
c2281_828	SNPe		1R	146.03
100000992|F|0	SilicoDArT	TGCAGGAAGGCCAGCTTATCTATATCCCCTGACAGTATCTCCGAGATCGGAAGAGCGGTTCAGCAGGAA	1R	146.59
100001747|F|0	SilicoDArT	TGCAGCTGCGATTGGTACTAAATCAATACGGTCTACAGCCGAGATCGGAAGAGCGGTTCAGCAGGAATG	1R	146.59
100002767|F|0	SilicoDArT	TGCAGGGTGTTTGGAGACTGGGATTTGGGTCCATGCGTATATTGACAAGAACCGAGATCGGAAGAGCGG	1R	146.59
100003368|F|0	SilicoDArT	TGCAGTTCCGATCTCAACTCAACCCAGTGATTGAAAAATTTCATCCCAACAACTACACCGAGATCGGAA	1R	146.59
100003420|F|0	SilicoDArT	TGCAGTGACATAATACTCAGAGTAAATGATGAGAGAGACTGAGAGAGAGAGATGCATGCATGTTAAACA	1R	146.59
100005459|F|0	SilicoDArT	TGCAGCTTCTTCAGTTGCTTCTCTTCCCACTGTGCCCGAGATCGGAAGAGCGGTTCAGCAGGAATGCCG	1R	146.59
100005459|F|0--14:T>C	SNP	TGCAGCTTCTTCAGTTGCTTCTCTTCCCACTGTGCCCGAGATCGGAAGAGCGGTTCAGCAGGAATGCCG	1R	146.59
100005607|F|0	SilicoDArT	TGCAGCATGTCCGCACGTCCTGGCCAACTAACTACTGCATGTCATGGACACACTTGCCACGGCAATTGA	1R	146.59
100007055|F|0	SilicoDArT	TGCAGCGGGATGAGTTGTGCAATGTGGCAATGCTGCCGTTTCTAGTGCACACAGTTTTGCCGAGATCGG	1R	146.59
100008905|F|0	SilicoDArT	TGCAGTAGCAGGTGAACTCGTGAGCCGATTCGTTTCCTTCCTCGCCAACAGGTACCTCCACTCTACCAG	1R	146.59
100010245|F|0	SilicoDArT	TGCAGTGCCTCGGGCCTTCCCTTTGGCTATTGCCACGGCCACATTGAAGCAAAATTCAACACCGAGATC	1R	146.59
100010415|F|0	SilicoDArT	TGCAGCAGCAGCGGCTTAACAACTAATTAATCATTTCTCTCGAAGACAATCATTTATCAGACAGCACAT	1R	146.59
100010462|F|0	SilicoDArT	TGCAGGCGCAGGGCAACTCCATCGTCCTCCAGCAGCACCAACACCAACAAGACTACCTGCCGAGATCGG	1R	146.59
100010620|F|0	SilicoDArT	TGCAGCCTCCACAGGGCCAAGGTCGAGGCCGAGGCAGCACCGCCGCCAAAGCTGCTATTCATCTCGCCG	1R	146.59
100013931|F|0	SilicoDArT	TGCAGCATTGATCCATCTCACAAGAGGAGGATCCATGCCTTTCTGGCTGTTGTCTGCCGTGCCTGCCTG	1R	146.59
100014813|F|0	SilicoDArT	TGCAGTGGGCCTAGTGGCATTGGCATTGGAGAGGCCAACTTGGTTCCGCTGTCGCGCAGCAGATTCAAC	1R	146.59
100018524|F|0	SilicoDArT	TGCAGCATCCATCGTCAATTTTTGCCACTCAATATATAGCGAATACCGAGATCGGAAGAGCGGTTCAGC	1R	146.59
100019398|F|0	SilicoDArT	TGCAGCCAGGCGATAGCTGAAGAGCCCGCTGTACTCTCTCTCTTCCCTTCTCACTCTCCCACATAGGAT	1R	146.59
100020297|F|0	SilicoDArT	TGCAGAGAAATCGATAAAACACTTTCTCTGCCGACCCTTCGCGAAAGTAAGACTCCTGACGAAGATCGA	1R	146.59
100021102|F|0	SilicoDArT	TGCAGCTTTTTTTCTTCCTTTCCCTACACCTCTAGCTTACTTTGCCGTGCACCACGACGTAAACAAGTA	1R	146.59
100021168|F|0	SilicoDArT	TGCAGGATTGCCGCCAAACAGAACTACGAAGATACTCACCTTGGCGCCAAACAAAACACACCCTGATCG	1R	146.59
100021286|F|0	SilicoDArT	TGCAGGAAAATCTTTTCCAGAAGAAGAAACCGAATCCGTCACCTTGAATACGATGGTAGTTCCCTGGCG	1R	146.59
100021606|F|0	SilicoDArT	TGCAGGCAATGTGTGGTCAAGATTCGTTAGAAGCGAGAAATAGTAGGAGATCCTATATGCAAAACTTTG	1R	146.59
100024161|F|0	SilicoDArT	TGCAGCACAGCTCCTACCTCTTCTCTTCCTTCTTACCGAGATCGGAAGAGCGGTTCAGCAGGAATGCCG	1R	146.59
100024193|F|0	SilicoDArT	TGCAGAGAGGGCACATCTCGCTCCCTGTCAGGGTGAGCTTCAGCCTTCAGGCACGCGCCATGGAAGACG	1R	146.59
100024272|F|0--46:T>C	SNP	TGCAGAGAGGGCACATCTCGCTCTCTCTGAGGGTTTCCGCCAGGCATGCGCCATGGAAGACGTGGGGCA	1R	146.59
100024424|F|0	SilicoDArT	TGCAGCGGGATGAGTTGTGCAATATGGCAATGCTGCCGTTTCTAGTGCACATAATTTTGCCGAGATCGG	1R	146.59
100025385|F|0	SilicoDArT	TGCAGTGTAGGATTACAGACGTTTATAGACCCAATCATTTTGTGCAAGGCAGGATCCAGTTGCGCAGCC	1R	146.59
100027070|F|0	SilicoDArT	TGCAGCCGTCAAGGAGGAGCAGCTGAGGTGAACTCACCATGGGCGTTCTCGCTCGTCATCGACCTTGCT	1R	146.59
100028617|F|0	SilicoDArT	TGCAGTCGTCCCTCATGGCCGTACAACTGCGGGTCCATATCTATCTTCCGAGATCGGAAGAGCGGTTCA	1R	146.59
100028617|F|0--25:A>G	SNP	TGCAGTCGTCCCTCATGGCCGTACAACTGCGGGTCCATATCTATCTTCCGAGATCGGAAGAGCGGTTCA	1R	146.59
100028926|F|0	SilicoDArT	TGCAGGAAAATCTTTTCCAGAAGAAGAAACTGAATCCATCACCTTGAATACCATGGTAGAGTAGTTCCC	1R	146.59
100033468|F|0	SilicoDArT	TGCAGGGACACTCCACCCAGACCCAGTGATCCGTTCCAAAGCCCCAAAACATGCAAAGAATGGCCTCGG	1R	146.59
100033758|F|0	SilicoDArT	TGCAGTCGCGCATCCTGACGCTCTTGGAGGAGTTCTAGCTCGCGCAAGTCCTCCCCGAGATCGGAAGAG	1R	146.59
100034811|F|0--32:C>G	SNP	TGCAGCTAGCAAAGATTAATTACTCTGGTACTCGAAGAGAGCTGAAGATGTTGTCAGGCTTGTGATCTT	1R	146.59
100035462|F|0--37:T>G	SNP	TGCAGCAGCAACCTTCCAGGAGCAAGCAAATGGCGCCTACTACTCTGAAGCTCAGGATCCTCGCCGTGG	1R	146.59
100036029|F|0	SilicoDArT	TGCAGTGTAATGGACGTCAGATGAGCCGCGTCCGAGAAGAAGCCGAGATCGGAAGAGCGGTTCAGCAGG	1R	146.59
100043977|F|0--60:T>C	SNP	TGCAGAGGGGGCACTTCTCGCTCTCCTTGAGCGTCCCCTCAAGGCACGCGCCATGGAAGATGTGGGGCA	1R	146.59
100044280|F|0	SilicoDArT	TGCAGCCGTAGGAGATTTTCTAGCACATAATTAGCTGTTTGTTTCCATTTATTAACAGAATTGAGTGGG	1R	146.59
100047944|F|0	SilicoDArT	TGCAGAGACAACTTACCCTGCCCACGCCGTCCCGTTCCCCCTTCGTCTCCATCATATATTCCCTCGTCT	1R	146.59
100052678|F|0	SilicoDArT	TGCAGTAATGGACGTCAGAGGAGCCGCGTCCGAGAAGAAGCCGAGATCGGAAGAGCGGTTCAGCAGGAA	1R	146.59
100053055|F|0	SilicoDArT	TGCAGTTGGAGCCGCTCTACCGCCAAGCTGCAACGTGAGCCGCCCACAAAGATGGAGCCCAAGGTGCCC	1R	146.59
100061174|F|0	SilicoDArT	TGCAGGCATCATATAGTGTCTTCGATGAAGCTAGCCTCCAGACGGGCCGAGATCGGAAGAGCGGTTCAG	1R	146.59
100062324|F|0	SilicoDArT	TGCAGAGAGGGCACATCTCGCTCCCCGTCAGGGTGAGCTTCAGGCACGCGCCATGGAAGACGTGGGGGG	1R	146.59
100075452|F|0--61:G>A	SNP	TGCAGTGCGCCGCGGATGAAGCTGAAACCGTCGACGGCGAGGACACAGACTACTGCGAGCGGCCGACGA	1R	146.59
100082334|F|0	SilicoDArT	TGCAGCGGCTGGCACTGCGGTACGTACCGAACTATATGTGGTATGCCCCAAAGTTCCCCGAGATCGGAA	1R	146.59
100091341|F|0	SilicoDArT	TGCAGTGTAATGGACGTCAGAGGAGCCGCGTCCGAGAAGAAGCCGAGATCGGAAGAGCGGTTCAGCAGA	1R	146.59
100095167|F|0	SilicoDArT	TGCAGGGCCAACACGGATCCTTGGCAGCGCCGACGATGCGAGCGAGCCGAGATCGGAAGAGCGGTTCAG	1R	146.59
100095363|F|0	SilicoDArT	TGCAGGCCCTGTGGTCGAGGCTGGTCTCGCAGGTGAGCGTCCCACCGAGATCGGAAGAGCGGTTCAGCA	1R	146.59
100098031|F|0	SilicoDArT	TGCAGTGTATGCTGTTCGCAAGGCCATGGCAAAGTGTAGGCAACGCTACTTTTGCGCACTGGCCGAGAT	1R	146.59
100098031|F|0--16:C>G	SNP	TGCAGTGTATGCTGTTCGCAAGGCCATGGCAAAGTGTAGGCAACGCTACTTTTGCGCACTGGCCGAGAT	1R	146.59
100104776|F|0	SilicoDArT	TGCAGGAGAGGCTGCGGTGACCTCTGGATCGGAACCGAGATCGGAAGAGCGGTTCAGCAGGAATGCCGA	1R	146.59
100120071|F|0	SilicoDArT	TGCAGGAGAGGCCGCGGTGACCTCTGGATCGGAGCCGAGATCGGAAGAGCGGTTCAGCAGGAATGCCGA	1R	146.59
100130224|F|0	SilicoDArT	TGCAGGCCCTGTGGTCCAGGCTGGTCTCGCAGGTGAGCGTCCCGCCGAGATCGGAAGAGCAGTTCAGCA	1R	146.59
c1915_716	SNPe		1R	146.59
rPt-507167	DArT		1R	146.59
rPt-509026	DArT	tgcagtgtaatggacgtcagaggagccgcgtccgagaagaagccggtggctgtgagcgaaccgacagcttcggcagggagtggggacggggggggagaagagatggggcctcgtggcaactgttgtgctgtattacactgctccatgacttggtggtccggagaagagagcacgactgcacgacgacgatgcaccgggtcttcacaaagcgagaatccaagattttttcggggacaactcctaaagctcttcaggtaatgcagcgaacactatggtctcgcacctcctgcttcagttgggaagttgggatacatggaacacgtgatgaactaagcctccttcaagcaagcccaaacgatatgccataataccaatcttagctaggattgtgaatggaca…	1R	146.59
3352049|F|0--27:C>G	SNP	TGCAGAGAAATCGATAAAACACTTTCTCTGCCGACCCTTCGCGAAAGTAAGACTCCTGACGAAGATCGA	1R	146.59
3744255|F|0--23:A>G	SNP	TGCAGCGGGATGAGTTGTGCAATATGGCAATGCTGCCGTTTCTAGTGCACATAATTTTGCCGAGATCGG	1R	146.59
100004019|F|0	SilicoDArT	TGCAGTAGGCCTTCCATTATGATCCAAAACCTGTGGTGTGTCCGAGATCGGAAGAGCGGTTCAGCAGGA	1R	147.15
100015513|F|0	SilicoDArT	TGCAGGCCCCGATATATCGAAATTCGCCATTCCAGCCGTAAGTTCGTTGCCACATCACTAATCTGCAAT	1R	147.15
100083835|F|0	SilicoDArT	TGCAGCGAGGCCTCGTAGGCCAGCTAGCGAATCCACCTCCCCAGCCACCGAGATCGGAAGAGCGGTTCA	1R	147.15
100004919|F|0	SilicoDArT	TGCAGTTTGGCCACCTCACCAGTATAGCATGTAGGCCGAGATCGGAAGAGCGGTTCAGCAGGAATGCCG	1R	148.86
100008738|F|0	SilicoDArT	TGCAGTGCATGAGGGTTACATCGTCGTTGCTTCTGCTCGTCCAAAAGCCTGTCCAAGAACTTTTGTCAT	1R	148.86
100008868|F|0	SilicoDArT	TGCAGCAGAGAGCAAGAGAGCACTGTACTCTAGCGTGCATGCCGAGATCGGAAGAGCGGTTCAGCAGGA	1R	148.86
100013615|F|0	SilicoDArT	TGCAGCTTATTCCCCCCTCCAGCTGGGAGACTCCACTCACCGAGATCGGAAGAGCGGTTCAGCAGGAAT	1R	148.86
100032825|F|0	SilicoDArT	TGCAGCAAACCACGAGCGTCAGTCAGGCCATCATTACAGCCATCTACTACTCCATGATTAATCGTGTCT	1R	148.86
100047096|F|0	SilicoDArT	TGCAGTAGAGAGCCAAAGCGCACTGTACTCCAGCAAGCACGCCGAGATCGGAAGAGCGGTTCAGCAGGA	1R	148.86
100066156|F|0	SilicoDArT	TGCAGGCAATACAAAGGAGGGGAGAGCAGTACTGCTGATGTGGTCTGATGATTGGGGCACGGAGGAGCA	1R	148.86
c3511_3136	SNPe		1R	148.86
100005466|F|0	SilicoDArT	TGCAGGAAAAACTGCTGTGAGATTCAGAGACCCAAGAAAACGACACAAAGATCCTGCATCTGGTCTGCC	1R	149.41
100006739|F|0	SilicoDArT	TGCAGACCTTAGCACTCCCATTAGAGAAACTGGGAAGGAAAGCAAATCACCACCGAGATCGGAAGAGCG	1R	149.41
100009486|F|0	SilicoDArT	TGCAGTAATTGGCACCTTTGGCATCACAGATTCCTGTTGGAAGAGTCGCCGAGATCGGAAGAGCGGTTC	1R	149.41
100012390|F|0	SilicoDArT	TGCAGAACAAGTCCTCGATTGATTAGCTGCGCTATAAGTTACTCCTGTCAGTATAAACAATCAAGAAAG	1R	149.41
100012986|F|0	SilicoDArT	TGCAGCTTCCGCCTTTTAGTTAGCAACAACATGACATGCATTTCTTTTCCATGGATGACGAGCTTGCTT	1R	149.41
100014025|F|0	SilicoDArT	TGCAGAAATATATACAGCCACGGCATGTTCAGCTACTACAAGCGTTCCTCCTACATACATATATACATA	1R	149.41
100014870|F|0--68:C>G	SNP	TGCAGCCAATCTCGAACAAGTATGCATGGTTACCAATAATTTTGTCTGCCCATTTTTTATCACCTAGCC	1R	149.41
100019076|F|0	SilicoDArT	TGCAGTACTAGCTCACCGTGGAAACCCCAAAGGCGTAAATAATATGGAGGAATCATAGAGCTAAAGTGT	1R	149.41
100023372|F|0	SilicoDArT	TGCAGAAATATATACAGCCACGGCATGTTCAGCTCCTACAAGCGTTCCTCCTACATACATATACACATA	1R	149.41
100050527|F|0	SilicoDArT	TGCAGTGCAATGGCCATTGGTGATGCGCGTCGGCGGCGGAGACGCAACACAATAGCCATGGTGCTGCAC	1R	149.41
100052833|F|0--13:T>C	SNP	TGCAGGGCGACCGTGCCCCCACCTTCTGCCGCCTCCTCGCCCGCAACACCGCCAGGGCCAAGCCCGAGA	1R	149.41
100060764|F|0	SilicoDArT	TGCAGCAGCAGGCAAATCATCACCAAATCGCTGAAAACATTCGCCCCAGCCACGAACACGGCGGCTCCG	1R	149.41
100068391|F|0--29:G>C	SNP	TGCAGCCAGTACGGGTACTGCGGCATGGGGGGCGACTACTGCGGCAAGGGCTGCCAGAACGGCGCCTGC	1R	149.41
100104977|F|0	SilicoDArT	TGCAGCTTTTCTTTTTCTCTTTTTCGCAGCTGCCCCGAGATCGGAAGAGCGGTTCAGCAGGAATGCCGA	1R	149.41
100145026|F|0	SilicoDArT	TGCAGCAGAGGTTGTTGGGGCAGAGCTTGCCGCCGAGATCGGAAGAACGGTTCAGCAGGAATGCCGAGA	1R	149.41
c16840_1042	SNPe		1R	149.41
c607_654	SNPe		1R	149.41
rPt-505202	DArT		1R	149.41
100003007|F|0	SilicoDArT	TGCAGTAATTTTAAAAACAACTAGTGATGATATATCGCGCATTCACGCGTCTTATTTCAGCCGAGATCG	1R	151.12
100003007|F|0--36:G>A	SNP	TGCAGTAATTTTAAAAACAACTAGTGATGATATATCGCGCATTCACGCGTCTTATTTCAGCCGAGATCG	1R	151.12
100004070|F|0--20:G>T	SNP	TGCAGGACTTCCAGGGCATGGTGGTGCTCATGGAGCAGGCCGAGATCGGAAGAGCGGTTCAGCAGGAAT	1R	151.12
100011234|F|0	SilicoDArT	TGCAGCGAGCCCTCCGAGATTTTGACCTCCACGAGAGCAAGCTTCCTGAGCAGGGGAAACTGAAGCGTC	1R	151.12
100015185|F|0	SilicoDArT	TGCAGAGCTTAGCTACTTAGCTTAAATTTGTGTCCCTACCTGTTTTGATACCATGGATGGAATCCATCC	1R	151.12
100016789|F|0	SilicoDArT	TGCAGCAGCTCCAACCTTGAGAACGAAAATCTGTATGTTATCGGTAGCTCTAGGTAGAACTCGAGCTCC	1R	151.12
100018258|F|0--39:T>C	SNP	TGCAGCTTGCCTTTTGGGTCATGCAAAGTTCTTAGATGCTGCTTTAGAGGAGCAAAGGCAAATCATTAG	1R	151.12
100025889|F|0	SilicoDArT	TGCAGAGATGTGCAAGAGTTGATTGAGTTGCTGATTGGGTGCATGAACCCGAGATCGGAAGAGCGGTTC	1R	151.12
100027697|F|0	SilicoDArT	TGCAGGAAACTTGTGGAGCTTGTTTCTTTCTTCTCTCAGAGCCCCTGATAAAGCCACGGCCACATTAAT	1R	151.12
100052089|F|0	SilicoDArT	TGCAGCACAAAGCAAGCAGCATCATTAGGCCAATTGTCCATACATACATTAGACTACACATGACAAAAT	1R	151.12
100053510|F|0--28:G>C	SNP	TGCAGTTCCTCACCAACTCCTGCGTCGTGCTCTTCATGATCCAGAGCGTCGACCGCCTCGTCCTCTGCC	1R	151.12
100074833|F|0	SilicoDArT	TGCAGCGAGCCCTCCGAGATTTTGACCTCCACGAGCGCGAGCTTATTGAGCAGGGGAAATCGAAGCGTC	1R	151.12
3734789|F|0--42:C>A	SNP	TGCAGGAAACTTGTGGAGCTTGTTTCTTTCTTCTCTCAGAGCCCCTGATAAAGCCACGGCCACATTAAT	1R	151.12
3738535|F|0--5:C>A	SNP	TGCAGCGAGCCCTCCGAGATTTTGACCTCCACGAGAGCAAGCTTCCTGAGCAGGGGAAACTGAAGCGTC	1R	151.12
3887145|F|0--23:A>G	SNP	TGCAGCACAAAGCAAGCAGCATCATTAGGCCAATTGTCCATACATACATTAGACTACACATGACAAAAT	1R	151.12
5221043|F|0--11:C>T	SNP	TGCAGCAGCTCCAACCTTGAGAACGAAAATCTGTATGTTATCGGTAGCTCTAGGTAGAACTCGAGCTCC	1R	151.12
100002690|F|0	SilicoDArT	TGCAGCTATCAGCACATGCGTAGGAGGAGGATTAAAGCTTAGCCGAGATCGGAAGAGCGGTTCAGCAGG	1R	151.67
100008276|F|0	SilicoDArT	TGCAGTTTAAGACAAATAACTAAGTACTAAACAAATGTGCAGTATGAAAGAATCCCCTAAGCTATGTGA	1R	151.67
100008546|F|0--27:T>C	SNP	TGCAGTCAGCCTTGCTGTACCACGTAGTAGTACTGTGCTAGTCCATCATCAGTTGTTGTGTAAGAACAT	1R	151.67
100008915|F|0	SilicoDArT	TGCAGTTTAAGACAAATACCTACTGTACTAAACAAATGTACAGTATGAAAGAATCACCTAAGCTATGTG	1R	151.67
100008920|F|0	SilicoDArT	TGCAGTTTAAGACAAATAACTACTGTACTAAACAAATGTATGAAAGAATCACCTAAGCTAAGCGAATTG	1R	151.67
100010523|F|0	SilicoDArT	TGCAGTTGTTGCTGCTGTTGTCCCACACCCAAGTGAACCTGATCGACCCCAAGAAAATGGCCACGGCAA	1R	151.67
100012295|F|0	SilicoDArT	TGCAGCGTAGCATCTCTGTCCATACCCACACAATCTCTTAGGTTGTTGATTTCAGTTGCTAGGCTGGGG	1R	151.67
100015573|F|0	SilicoDArT	TGCAGTGTAATGGCATATGCATCGTCATAGCATGCATGGCTGCCAAATTCCAAGTCGTCACAAACCCTA	1R	151.67
100023352|F|0	SilicoDArT	TGCAGGCATGGCAGTTTGCTCCTAGCGGATCGGTCCAATGATCCATCAATCAATCCACGCCTTCCAGCG	1R	151.67
100027977|F|0--6:T>A	SNP	TGCAGGTGGACGAGTCGAGCATGACAGGGGAGCCCCACCCAATCGAGATCGATGCCGAGAAGAACCCCT	1R	151.67
100050924|F|0	SilicoDArT	TGCAGTTGCTACAGGCCTATGCACGCTGATGCAGGGCGGGCCGAGATCGGAAGAGCGGTTCAGCAGGAA	1R	151.67
100077181|F|0	SilicoDArT	TGCAGGTGGACGAGTCGAGTATGACGGGCGAGCCCCACCCAATCGAGATCGATGCCGAGAAGAACCCGT	1R	151.67
100096712|F|0	SilicoDArT	TGCAGCAGTTGCTATAGGCCTAGGCCTATGCACGCTGATGCAGGGCGGGCCGAGATCGGAAGAGCGGTT	1R	151.67
100098067|F|0	SilicoDArT	TGCAGTGGTATCTATCCACGGTCTACCGACGCACTCGATCGATTTTTGCTGGCTCATTCTGCCCCACAT	1R	151.67
c5474_324	SNPe		1R	151.67
100001285|F|0	SilicoDArT	TGCAGAATCTGAAACCACCATCCATCCCGCGAGGGATCCTATCACGTCATCTCTGCTAGTTAAACATAA	1R	152.23
100003295|F|0	SilicoDArT	TGCAGTTCAACAAATGTATGAAAGAATCCCCTAAGCTATGTGACTTGAGAAATATGAACACTGCGGTAT	1R	152.23
100004360|F|0	SilicoDArT	TGCAGTTTTTCGTAAGTGTAGACATCTTGGATAGATACCATGTTTGATGTGATGTACTTTGACTGAAAT	1R	152.23
100005097|F|0	SilicoDArT	TGCAGCTTGAGACAGACATGCATTCATACATGCTAAGCTTCATCGTGCCATCTGCGAACTCTGACCCTG	1R	152.23
100005933|F|0	SilicoDArT	TGCAGGCAGCCATGAAAGAAACAATGCGGCTACACCCGAGATCGGAAGAGCGGTTCAGCAGGAATGCCG	1R	152.23
100005966|F|0	SilicoDArT	TGCAGCTCCTACTGTGCTCGTTCTCATGGGCCCTAGTGCGTTCGCGCCCTGGAGCGCTCCGAGATCGGA	1R	152.23
100011258|F|0	SilicoDArT	TGCAGTTATATGTCCTAGGTCAATATTTTATATCGAGCAGTTTGGAGATAACAAGATAACCAGAAGGTG	1R	152.23
100023299|F|0	SilicoDArT	TGCAGGCGGCTATTAAAGAGACAATGCGGCTACACCCGAGATCGGAAGAGCGGTTCAGCAGGAATGCCG	1R	152.23
100028649|F|0	SilicoDArT	TGCAGTTTCTGTAGAGGGAAGCCGCAACTGCTTTTGCAAGTGTCAAGCTGTCTGTTAGGACTGTGACTT	1R	152.23
100032206|F|0--28:T>C	SNP	TGCAGCTGGCGATTGAGGAGGAGGACGATGCCACCAGCAAGCTGGCGCAGCCGATGCAGCCCTCCCGAG	1R	152.23
100051361|F|0	SilicoDArT	TGCAGAAGACGTGGTCCTGGGTCCTGAGCACCGCGTCGGCGAGCGGGGACGAGGATACCACGACGGCCC	1R	152.23
100052612|F|0--25:C>G	SNP	TGCAGCCCGTCGTCTTCCTCCACGGCGGTCCTGGGGCCGAGATCGGAAGAGCGGTTCAGCAGGAATGCC	1R	152.23
100067395|F|0	SilicoDArT	TGCAGCCTCGATCGTCGTCCCATGCGCGGGCGCGGCTCTGACATACACTTGGGCTGCGCCGAGATCGGA	1R	152.23
100070725|F|0	SilicoDArT	TGCAGCTTTGCCGTACCTACTATTGTGTCGCGTTGCCGCCGATGGTCCCGAGATCGGAAGAGCGGTTCA	1R	152.23
100080085|F|0	SilicoDArT	TGCAGAAGACGTTGTCCTGGGTCCTGAGCACCGCCTCGGCGAGTGAGGCCGAGGATACCACGACGGCCC	1R	152.23
100084698|F|0--25:C>G	SNP	TGCAGCCCGTCGTCTTCCTCCACGGCGGTCCTGGGGCCGGCACGTCGCCGAGATCGGAAGAGCGGTTCA	1R	152.23
100088424|F|0	SilicoDArT	TGCAGTGCAGCGTGCTGGAGCTCGAGCACGTCGTCAGCAAGGCGCCGAGATCGGAAGAGCGGTTCAGCA	1R	152.23
100126234|F|0	SilicoDArT	TGCAGTTGGGTAACGACTGACGGCCGATGTTTGCCCGAGATCGGAAGAGCGGTTCAGCAGGAATGCCGA	1R	152.23
100144819|F|0	SilicoDArT	TGCAGCAGCTGAGCACCTCCACTAGGTGCCCCGAAATCGGAAGAGCGGTTCAGCAGGAATGCCGAGACC	1R	152.23
c12219_1001	SNPe		1R	152.23
100032206|F|0	SilicoDArT	TGCAGCTGGCGATTGAGGAGGAGGACGATGCCACCAGCAAGCTGGCGCAGCCGATGCAGCCCTCCCGAG	1R	152.23
100001285|F|0--66:T>G	SNP	TGCAGAATCTGAAACCACCATCCATCCCGCGAGGGATCCTATCACGTCATCTCTGCTAGTTAAACATAA	1R	152.23
c14912_871	SNPe		1R	153.35
100010081|F|0	SilicoDArT	TGCAGTGGTTGTTATGGCACCAACATGATCACTGACCACATGAGCAGCCGAGTTCGTTTGTTCTGCCAA	1R	153.91
100010081|F|0--16:G>A	SNP	TGCAGTGGTTGTTATGGCACCAACATGATCACTGACCACATGAGCAGCCGAGTTCGTTTGTTCTGCCAA	1R	153.91
100042599|F|0	SilicoDArT	TGCAGCTTGTCCCTCAGGTCGTCCAGCTCCTTCCTCACCTCCACCAGCCGAGATCGGAAGAGCGGTTCA	1R	153.91
100101980|F|0--32:C>T	SNP	TGCAGACTCCTGAGCTCTGAATCAAAATCTTTCTGCATGGACACGGCGCGGCGGCTGAACTGCTCGTCG	1R	153.91
100101980|F|0--47:G>A	SNP	TGCAGACTCCTGAGCTCTGAATCAAAATCTTTCTGCATGGACACGGCGCGGCGGCTGAACTGCTCGTCG	1R	153.91
c2571_985	SNPe		1R	153.91
100011436|F|0	SilicoDArT	TGCAGCATTCTTCTTTGTGGGCTGTATATATATAACTGGGTTTGGGCCGAGATCGGAAGAGCGGTTCAG	1R	154.46
100026887|F|0	SilicoDArT	TGCAGCGCCACTCAACCCAACCGCACCGCTTTGGCTTAAATGTTGCCGTGCTTCTGTTGGAAACGGCAG	1R	154.46
100044069|F|0	SilicoDArT	TGCAGTTGCAGACTTGCAGCGCCACTCAAGCCAACCGCACCGCTTTGGCTTAAATGTTGCCGTGCTTCT	1R	154.46
100072431|F|0	SilicoDArT	TGCAGCACACGGACCATGCATTCCCACTGTCAATCAGACGCCGAGCGCCCAAGAGAACGATCGACGGAC	1R	154.46
c3138_1475	SNPe		1R	155.02
100028348|F|0	SilicoDArT	TGCAGTTCATAGTCCTTCCTGTCTAGGGATCCATTGGTCTCTCTGAATTTGGATACTCGTACCATTGCC	1R	156.72
100037137|F|0	SilicoDArT	TGCAGTGTACGTCTCACCTGCTAAAAGCTCATACTACCTTTCTTTTTGTTTCTTTTATGCAAGGAAAAA	1R	158.43
100051278|F|0	SilicoDArT	TGCAGGGTATGATGAGCTTAATGGCGACAAGGAGTATGTCGTGTCGTGGGACGAGATCCGAGATCGGAA	1R	158.43
100056442|F|0--44:T>C	SNP	TGCAGCTGCAACACCGCTCGCGTCGCCATAGATTGTGTGGCGCATCCCCACGCCCACGCACTCATGGTC	1R	158.43
100146260|F|0	SilicoDArT	TGCAGAGCAGGTAAAGCGTCGCCTGGGTAGCAGGGCAGGGCGCCGAGATCGGAAGAGCGGTTCAGCAGG	1R	158.43
100001428|F|0	SilicoDArT	TGCAGCTTGTTCTATTACTAGATTTTCCTTGATAAGAACATCCTCATCAGTGGGGCAAGCATCATCAGC	1R	158.98
100011300|F|0	SilicoDArT	TGCAGCCCAGAAGTATTTATCTTGTGATGAAAGCAGAGTGCAAGGAGCAGAAGAGAAAATATTTTCAGG	1R	158.98
100017321|F|0	SilicoDArT	TGCAGCTTGTTCTTTTACTAGATTTTCCTTGATAAGAACATGCTCATCAGTGGGGCAAGCATCATCAGC	1R	158.98
100018114|F|0	SilicoDArT	TGCAGAGGCGAGGGAAAACAAAAAGGCAGCCGCATCTGGTTCCGAGATCGGAAGAGCGGTTCAGCAGGA	1R	158.98
100029755|F|0	SilicoDArT	TGCAGGCAGCTCCATGCCCTCCTCCTCAAGAACCTCGCCTTCCAGGTGAGTCACTGAGTTTCTTCTGCC	1R	158.98
100031411|F|0	SilicoDArT	TGCAGGCAGCTCCATGCCCTCCTCCTCAAGAACCTCGCCTTCCAGGTGAGCGACTCATTTTCTTCTGCC	1R	158.98
100031468|F|0	SilicoDArT	TGCAGGAGCACAAAGGAATCATGGACTGCTTCAGACTGCCGCCGAGATCGGAAGAGCGGTTCAGCAGGA	1R	158.98
100038670|F|0	SilicoDArT	TGCAGGACCATTACAACGTCATTCATCGTGGGCCGCTGCCCGAGATCGGAAGAGCGGTTCAGCAGGAAT	1R	158.98
100058700|F|0	SilicoDArT	TGCAGAAGAAGGAGAAGCCGCGCGGGCACAAGATGAAGCCCTGCAAGAGCTACGCCGCGCTCCGAGGGA	1R	158.98
100058700|F|0--62:C>G	SNP	TGCAGAAGAAGGAGAAGCCGCGCGGGCACAAGATGAAGCCCTGCAAGAGCTACGCCGCGCTCCGAGGGA	1R	158.98
100067948|F|0	SilicoDArT	TGCAGAGGCAACGAAAAACAAAAAGGCAGCCGCATCTGGTTCCGAGATCGGAAGAGCGGTTCAGCAGGA	1R	158.98
100076397|F|0	SilicoDArT	TGCAGGATGATGGGCGAGGAGGAGGAGTATGCCTTCGAGGCGTCGTCGTGCGCGTCCACCGAGATCGGA	1R	158.98
100133012|F|0	SilicoDArT	TGCAGCGGACCATCTGCTCCACACCGAGATCGGAAAAGCGGTTCAGCAGGAATGCCGAGACCGATCTCG	1R	158.98
c4797_681	SNPe		1R	158.98
100029755|F|0--53:C>G	SNP	TGCAGGCAGCTCCATGCCCTCCTCCTCAAGAACCTCGCCTTCCAGGTGAGTCACTGAGTTTCTTCTGCC	1R	158.98
100005072|F|0	SilicoDArT	TGCAGGTTTCATCACCATAGACTGCGGTCTACAGGAGCAGAGCAGCTACGCGGACACCGTCTCCAAGAT	1R	159.54
100005813|F|0	SilicoDArT	TGCAGTGTGATGCTAAATTTGAATTACCTGAACTGTGTGACTTCTCTATTTTTTCTTGTTTTAGCAAGA	1R	159.54
100010756|F|0	SilicoDArT	TGCAGGAGTGCATTGAGCTCGAAGTTGCACACGGCAATGTTAATGCGGGATTTTACACGACCGAGATCG	1R	159.54
100010877|F|0	SilicoDArT	TGCAGGATTCATAAGCATAGACTGCGGAACGCAGGGGAAGGAGGGTCACGTGGACAAGGCCACCAAGCT	1R	159.54
100012730|F|0	SilicoDArT	TGCAGAATCTGAAGCTATATCGCTAAACAACTTACGTACCTTCAATGTGCTCTTGCAGGGTTCCTTCGG	1R	159.54
100013383|F|0	SilicoDArT	TGCAGAAAGGGATGAAGAAAACACCTAAGACAACAGGGAAAATACATTGGTATCAACACAATGTTGTTG	1R	159.54
100015129|F|0	SilicoDArT	TGCAGATCCTCCCAACTAACGCCGTGCGACAGTTCTACATCTACCTCAATGACCAGCTGTGGTACCCAA	1R	159.54
100046877|F|0	SilicoDArT	TGCAGATATTTGATCTGTTCGATCTGAAGAGAAATGGCGTGATCGAATTTGACGAGTTTGTTCGGTCCC	1R	159.54
100020411|F|0	SilicoDArT	TGCAGCTCAGAGAAGTGCGTGATGATGAAATATCCCGAGATCGGAAGAGCGGTTCAGCAGGAATGCCGA	1R	160.1
100134463|F|0	SilicoDArT	TGCAGCCAAGGCCCTCGGCTTCGACGTTTTTCCTACCAGTGACCGAGATCGGAAGAGCGGTTCAGCAGG	1R	160.1
rPt-507905	DArT	tgcagaatgtaaacaagactattgttagcctagtgctacacagatcaacaagttgatttagaatattgtcctctctgaagtagagacacaattagtcaatatatgttaccgatgtatttaatcgtcatctccatctttttgctcttgaagtgatcctacagtgcattaattaaatgagtaagtaaactgagtagtccataaaatattcatgcaacaggtaaggcagcacaatttctagtaaataccaataataattaagtcatggagaatggaatcaagtccagtggcaagaaaatgttggaatgtaccttaatcttgtgagtcaaccggagaccaatatcaagaagcagcttatttccagacgcatcttgctgatctgaagcgggtatgcttttggca…	1R	160.66
c17760_991	SNPe		1R	161.21
100021782|F|0	SilicoDArT	TGCAGGAGAAGTTCATCAAGTTCATCGAGGGCAGCCGATACGTCCCGAGATCGGAAGAGCGGTTCAGCA	1R	161.77
100022377|F|0	SilicoDArT	TGCAGCTTTGTTTCCCGTGGTAGCGAGCAGCGCATTATTATCCCGCAGCAAACGAAACTATATGGTGCC	1R	161.77
100026786|F|0	SilicoDArT	TGCAGCCAGATCTCGCGCAGCTCCTCCTTGTTGATGTGGTCCAGCTGCATCTGCCGCCGAGATCGGAAG	1R	161.77
100030304|F|0	SilicoDArT	TGCAGCCAGATCTCGCGCAGCTCCTCCTTGTTGATGTGGTCCAGCTGCATCTGCCGCCGCCGAGATCGG	1R	161.77
100046171|F|0	SilicoDArT	TGCAGTGTAAAAATAGGAAAGAAATACGAGAGAAGCAAAGAATCAAACCGAGGAGCGAAAGTGCCTTTC	1R	161.77
100074762|F|0	SilicoDArT	TGCAGGAGAAGTTCATCAAGTTCATTGAGGGCAGCCGATACGTCCCCGTGAGGCCCGCCCCCTGCGGCG	1R	161.77
100140457|F|0	SilicoDArT	TGCAGGGGGACGACGCGGGCTGGATTCGCCAGGATCTGGAAGGCCGAGATCGGAAGAGCCGTTCAGCAG	1R	161.77
100074762|F|0--25:T>C	SNP	TGCAGGAGAAGTTCATCAAGTTCATTGAGGGCAGCCGATACGTCCCCGTGAGGCCCGCCCCCTGCGGCG	1R	161.77
100010576|F|0	SilicoDArT	TGCAGGCATGGAAGCACCGTTCGTCAATTTCATCCTGGGCCGAGATCGGAAGAGCGGTTCAGCAGGAAT	1R	162.33
100023244|F|0	SilicoDArT	TGCAGCGCATGGCAAAATAACCCCCTTCTCCTTGTACCAACCGACCGCCGAGATCGGAAGAGCGGTTCA	1R	162.33
100026264|F|0	SilicoDArT	TGCAGGATCCGATCAGGAGTAGTATACGCAAGCATGAGCACGTAAATAAACAAAATCCAATACGTACAG	1R	162.33
100049957|F|0	SilicoDArT	TGCAGCGCAGGACAAAATAACCCCCTTCTCCTTGTACCGACCGACCGCCGAGATCGGAAGAGCGGTTCA	1R	162.33
100064200|F|0--9:G>C	SNP	TGCAGCAGCGCCCGCGCCCGCGGCCCCAGGCGTCGCAGGACTCGCGCAACGTCTGCGGCATCCCCTGGA	1R	162.33
100072085|F|0	SilicoDArT	TGCAGCATGGTCCGAGAGGTCCTATTGGACGCTCGCGAGCGGCGAACAGAAGAGCCTTCGCTGAAGAGC	1R	162.33
3356327|F|0--9:G>T	SNP	TGCAGCGCAGGACAAAATAACCCCCTTCTCCTTGTACCGACCGACCGCCGAGATCGGAAGAGCGGTTCA	1R	162.33
3908680|F|0--46:C>G	SNP	TGCAGCAGCGCCCGCGCCCGCGGCCCCAGGCGTCGCAGGACTCGCGCAACGTCTGCGGCATCCCCTGGA	1R	162.33
100020891|F|0	SilicoDArT	TGCAGCCCACTAATGTTGTTATGAGAACCAGACATGTCAAATCCACAAGTCCCTTTGACGTCACTGCTT	1R	162.9
100027631|F|0	SilicoDArT	TGCAGGCGCTCTACTCCGTCGGCAACTTCTTCTTACGCCCTAGCAACCCCAACAAGTGCTACTGACGCA	1R	162.9
100042298|F|0	SilicoDArT	TGCAGGCGCTCTACTCCGTCGGCAACTTCTTCCTCCGCCCCAGCAACCCCAACAAGTGCTACTGACGCA	1R	162.9
100048553|F|0	SilicoDArT	TGCAGTCACGACATGTGGTTGCGTACTGGTGTCTGTTCAGTATAACTGAAGAACGGTGGATGTGCTAAT	1R	162.9
100082110|F|0	SilicoDArT	TGCAGGTCTTGCACCAGACCATGCCCTCCACGCCAATGGTGAAGTTCACGGCGGAGGCGCCGAGATCGG	1R	162.9
100128666|F|0	SilicoDArT	TGCAGGTCTTGCACCAGACCATGCCCTCCACGCCGATCGTGAAGTTCACGGCGGAGGCGCCGAGATCGA	1R	162.9
c9390_1290	SNPe		1R	162.9
rPt-402270	DArT		1R	162.9
3349403|F|0--26:T>C	SNP	TGCAGTCACGACATGTGGTTGCGTACTGGTGTCTGTTCAGTATAACTGAAGAACGGTGGATGTGCTAAT	1R	162.9
3730048|F|0--32:T>C	SNP	TGCAGGCGCTCTACTCCGTCGGCAACTTCTTCTTACGCCCTAGCAACCCCAACAAGTGCTACTGACGCA	1R	162.9
3730048|F|0--7:G>A	SNP	TGCAGGCGCTCTACTCCGTCGGCAACTTCTTCTTACGCCCTAGCAACCCCAACAAGTGCTACTGACGCA	1R	162.9
100059633|F|0--16:A>G	SNP	TGCAGAGACAAACACAAAAGCACCAATTCCCAAATCAACATCTCGCGAAACGGTTGCCGTCAAGGTGCA	1R	163.46
100002435|F|0--11:A>G	SNP	TGCAGTTCTTGATGCAGCTCCACTGCTTTGGCCCCATCCCCGAGATCGGAAGAGCGGTTCAGCAGGAAT	1R	164.02
100006049|F|0--7:G>C	SNP	TGCAGACGCAGAACGTGGTGGTGCCCGTGATGCTCAGCTCCGAGATCGGAAGAGCGGTTCAGCAGGAAT	1R	164.02
100006420|F|0--9:G>A	SNP	TGCAGCAGAGATGTCTGAAACTCAAATAGGAAGACAAGAGATGGAAATCCGAGATCGGAAGAGCGGTTC	1R	164.02
100010557|F|0	SilicoDArT	TGCAGCCCATTTATGTCTTTGGTCAGTTACGCAGTACTCCACACACATTGTCCTGCTAACTCCCCACGC	1R	164.02
100013128|F|0	SilicoDArT	TGCAGTAATTAGCCGATCGAGCCTCACATAGTGCCAACTCTGTTCCTTCCGAGATCGGAAGAGCGGTTC	1R	164.02
100019214|F|0--5:C>T	SNP	TGCAGCATTTGACCATACAGGCGGAAGTCGCTACCGATGGTTTATTATAGCGACGACGATGACGAGGAC	1R	164.02
100022261|F|0	SilicoDArT	TGCAGATACTTCCTATTGTTTCTGAGAACCCTGCACCAGAACTGGACGCTGAGATTTTCTCTCAGTACG	1R	164.02
100042835|F|0--33:T>G	SNP	TGCAGCCGCATACTTCAGTAAGTAGTAGTATCTTCTTTGCTTGATGGACACCATGGACGCTTGGTTAAA	1R	164.02
100092037|F|0	SilicoDArT	TGCAGGGCCATGCTCCTTCGTCCCGTCAATGCCGCGGCAGTTCACTGCGGCCGAGATCGGAAGAGCGGT	1R	164.02
c10735_694	SNPe		1R	164.02
100006420|F|0	SilicoDArT	TGCAGCAGAGATGTCTGAAACTCAAATAGGAAGACAAGAGATGGAAATCCGAGATCGGAAGAGCGGTTC	1R	164.02
100012299|F|0	SilicoDArT	TGCAGGTTAACGAGCAGTATTGTTTTGCTCGTAGTATGCGATGTATATCATTCAGTGAGCTTCTATGTG	1R	164.58
100017447|F|0	SilicoDArT	TGCAGGCAAAATCCGTACTAATCAGCATGGCCTAATCAGTTTTGCCTCGATCGCACGTAGATATCGCTC	1R	164.58
100084913|F|0--28:T>C	SNP	TGCAGACTGTCGTGCCCTTTGAGATGGATTGGCCGACTCTCTTCTTGTCTCGTCTCGAGGGCCACAAAG	1R	164.58
100084913|F|0--34:G>C	SNP	TGCAGACTGTCGTGCCCTTTGAGATGGATTGGCCGACTCTCTTCTTGTCTCGTCTCGAGGGCCACAAAG	1R	164.58
100004553|F|0	SilicoDArT	TGCAGCTGCCAGAAGCGTCACGATCACGGTCATCGCCGAGATCGGAAGAGCGGTTCAGCAGGAATGCCG	1R	165.71
100019819|F|0	SilicoDArT	TGCAGCTGCTGCTGGAAGCGTCACGATCACGGTCATCGCCGAGATCGGAAGAGCGGTTCAGCAGGAATG	1R	165.71
100006460|F|0	SilicoDArT	TGCAGCTCCCATGCATAAGGTGTGCTTGTCATGTGTACGTATGTGTCCGAGATCGGAAGAGCGGTTCAG	1R	166.26
100013072|F|0	SilicoDArT	TGCAGCATTCCCTGAACCTGTAATTTCTGAAGACAAGACAACAAGTAACTAGCACTATCAGTAGTACGT	1R	166.26
100019001|F|0	SilicoDArT	TGCAGTATTTCATCTTGAGAAAAGAATGCCATAACGATATGAAAAAGCTAGGATGACGTAATCCAAAAG	1R	166.26
100022859|F|0	SilicoDArT	TGCAGGGACGAAGAGGACACAAAAAATGTCCGTTTTTGTTTTGTGTGACCCAAATTTGCGTCGGAAATG	1R	166.26
100024271|F|0	SilicoDArT	TGCAGATGCTACGGGGTGTAGGATGGAAGAACGGAGAGAAAGACAACGACTTCGTTTGCGGCAATCGAA	1R	166.26
100031745|F|0	SilicoDArT	TGCAGCCCTTGTAGATACCGATTGACGAAGATAAGAGTAGAGATAAGCGGGCTCTGATACTCATTCTCA	1R	166.26
100038261|F|0	SilicoDArT	TGCAGCTGGGGGTCTTAAAAGGATCTTCTTTTATTATTGCTTTACTAAAGATATGTCTGGAGAAACATG	1R	166.26
100038919|F|0	SilicoDArT	TGCAGTGCTTAAAAAAGATGGGAAGGTGTCTCGGATACAATGGATTCATTACGTCACACGCAGAAAGTA	1R	166.26
100078565|F|0	SilicoDArT	TGCAGTCTCATCGAGATCGACGGCGTGGTGCACGAGTTCCAAGCTGTTCCGAGATCGGAAGAGCGGTTC	1R	166.26
100122310|F|0	SilicoDArT	TGCAGCCTCATCGAGATCGACGGCGTGGTGCACGAGTTCCAAGCAGTACCGAGATCGGAAGAGCGGTTC	1R	166.26
3596886|F|0--35:G>C	SNP	TGCAGATGCTACGGGGTGTAGGATGGAAGAACGGAGAGAAAGACAACGACTTCGTTTGCGGCAATCGAA	1R	166.26
3895852|F|0--5:T>C	SNP	TGCAGTCTCATCGAGATCGACGGCGTGGTGCACGAGTTCCAAGCTGTTCCGAGATCGGAAGAGCGGTTC	1R	166.26
100024041|F|0	SilicoDArT	TGCAGCATTGAAGAAACAAATGTCATCAGATGAATATCTAAAGGAAATGTTATCCAAAAAGTGTATTCA	1R	166.82
100006075|F|0	SilicoDArT	TGCAGGCAAGTTCGCTCATCTCTGTCAGTGTTGAAATTTGTATCCATTTGGCTGTTTTATTATCCCGAG	1R	167.39
100006075|F|0--27:G>A	SNP	TGCAGGCAAGTTCGCTCATCTCTGTCAGTGTTGAAATTTGTATCCATTTGGCTGTTTTATTATCCCGAG	1R	167.39
100010737|F|0	SilicoDArT	TGCAGTGTGCAGTGTCGGCGCGATCACGAGGTTTAATTCGGGTTATCCCTCGAGCTTAATGAGCGGATC	1R	167.39
100014253|F|0	SilicoDArT	TGCAGATCAGATGCATGTGACGACCCAAGTTGTCACTGAGCATTTTTCATCACCACTTTGTGTGTGCTC	1R	167.39
100014253|F|0--17:T>C	SNP	TGCAGATCAGATGCATGTGACGACCCAAGTTGTCACTGAGCATTTTTCATCACCACTTTGTGTGTGCTC	1R	167.39
100018488|F|0	SilicoDArT	TGCAGCCGCTCCCTACCGTCCACGCTCCTCTGTTCTGTTATCCTGCTCCCCATCAGGATCTCTAGAAGC	1R	167.39
100020809|F|0--40:G>A	SNP	TGCAGGTGGTGCACCTCAACTCCTGTCTCTGCGGCGACAGGGACATGATGATGATTGTGGATGCCCCCG	1R	167.39
100020809|F|0--8:G>C	SNP	TGCAGGTGGTGCACCTCAACTCCTGTCTCTGCGGCGACAGGGACATGATGATGATTGTGGATGCCCCCG	1R	167.39
100022104|F|0	SilicoDArT	TGCAGCAAAATCTTCAGTATACTACGCATTAGTAAAAACACAGTGATTGCATTTCAAGGAAAAAACACA	1R	167.39
100022365|F|0	SilicoDArT	TGCAGCAAAATCTTCAGTATACTACGCATTAGTAAAAACACAGTGATTGCATTTCAAGAAAAAAGTACA	1R	167.39
100024232|F|0--12:C>A	SNP	TGCAGTAATCTCCACCAAGAAGCTCTCCAGCTCTCCCTTGTTCCACTCAGCAAACACATCGGCTATCTC	1R	167.39
100024232|F|0--30:C>T	SNP	TGCAGTAATCTCCACCAAGAAGCTCTCCAGCTCTCCCTTGTTCCACTCAGCAAACACATCGGCTATCTC	1R	167.39
100059054|F|0--64:T>C	SNP	TGCAGTCTTACTGGCTCTGATGCGGCCATCGACCCGCCAACGTACGTCGACACGTATGGGGCACTAAGA	1R	167.39
wPt-5481	DArT		1R	167.39
3734047|F|0--58:A>G	SNP	TGCAGCAAAATCTTCAGTATACTACGCATTAGTAAAAACACAGTGATTGCATTTCAAGAAAAAAGTACA	1R	167.39
100007105|F|0	SilicoDArT	TGCAGGTTCGTCCATTGGCCATGTCACTCGCAGGTGTATCGTTGATCCGTGACGGCAAGCTATGGCTTT	1R	169.09
100007494|F|0	SilicoDArT	TGCAGACGAAGACAACAGCCGCTGGCCTAATGTTTTCTTCGGCACTGTTGCCCCTGAGACAATATCTAC	1R	169.09
100019630|F|0	SilicoDArT	TGCAGCCACAGGTCTGACCCAGGCACCCAGCTCGCCAACACACCGAGATCGGAAGAGCGGTTCAGCAGG	1R	169.09
100004574|F|0	SilicoDArT	TGCAGTTCAAAGATGGAATTTCCATTGCAAAAACATGCAGGGTCTGTTTGGATCAGAGCCATCGGTTGC	1R	169.65
100010884|F|0--27:G>C	SNP	TGCAGGAGTACAAGAGCCACGCCGACAGCTTCATCTGCTCCATGGTGCCCGAGATCGGAAGAGCGGTTC	1R	169.65
100012794|F|0	SilicoDArT	TGCAGCACGAGCAAGGAGCCCACTCAGTCCACAAATCAAACCCTATAAGCTAGCCCTGCGTTTTCCCCG	1R	169.65
100014754|F|0--65:G>C	SNP	TGCAGCTCGCCCTTCATCATGCCGCCGAACTCCAGCACGCTCCACGCCAGCATCGTCGAGCTGAAGGCC	1R	169.65
100025882|F|0	SilicoDArT	TGCAGCGAGGTCGCTAACTCGGGAGCAGGTGAAGCCGTGACCTTGGCATAGAGCTACTTTGTCGGGCAT	1R	169.65
100025882|F|0--29:T>C	SNP	TGCAGCGAGGTCGCTAACTCGGGAGCAGGTGAAGCCGTGACCTTGGCATAGAGCTACTTTGTCGGGCAT	1R	169.65
100027415|F|0	SilicoDArT	TGCAGCTGGTTACAGCATCTTCAGTTCAAATCGAGTAACTGTATTTCTATGTCTTCCCGAGATCGGAAG	1R	169.65
100028146|F|0	SilicoDArT	TGCAGCTGCTTACGGCATCTTCAGTTCAAAACGAGTAACTGGATTTCCATGTCTTCCCGCGCCAAAACT	1R	169.65
100029624|F|0	SilicoDArT	TGCAGCTTGAGCCTGCCTCCCCTGCTCTTTCACCCCACCACCAGCCTCGCCTAAGCTAAGCCCGATCTG	1R	169.65
100047007|F|0	SilicoDArT	TGCAGGCCGCAGCTAGCCCAGCCACCCAAATGGGCTGGCTCATGTTTACATGGCCGAGATCGGAAGAGC	1R	169.65
100047007|F|0--41:A>G	SNP	TGCAGGCCGCAGCTAGCCCAGCCACCCAAATGGGCTGGCTCATGTTTACATGGCCGAGATCGGAAGAGC	1R	169.65
100051971|F|0	SilicoDArT	TGCAGCTTAATACTAACGATCTACAGTACAAACGAATACGTATGACGATCCACTCACATCGATCATGAC	1R	169.65
100066917|F|0	SilicoDArT	TGCAGCGCGCCCACCTTCTGCACGAGGAAGGACTTGGAGAGGAGGATCCTGGCACCGAGATCGGAAGAG	1R	169.65
100083208|F|0	SilicoDArT	TGCAGCAGACTACACCTCGACTTGCGACGGTTCCACCTGGTACGGTTGATGTAGTTCCATCTGGTATAT	1R	169.65
100087652|F|0	SilicoDArT	TGCAGCTCCACCTCATTCACGCCGTCCCGTATAAATGACGAGGCCATACCATCGTCACCATCGTCGAGT	1R	169.65
100117840|F|0	SilicoDArT	TGCAGGTTGCGACGCAGCACGTCGGAGCGCCGCGCGAGCGCGTGTATGTGCCCCGAGATCGGAAGAGCG	1R	169.65
c17716_1191	SNPe		1R	169.65
rPt-410988	DArT		1R	169.65
100014332|F|0	SilicoDArT	TGCAGGCAGAGAGGGCAGCGCAGGCTAGCCAGAACGCCACAGCGACGCTGTTGACAAGATACAGGCAAA	1R	170.77
100015966|F|0	SilicoDArT	TGCAGCTGCCTGGCAGTCGCCTTAAGACGTATCACAATCCTCCGAGATCGGAAGAGCGGTTCAGCAGGA	1R	170.77
100017658|F|0	SilicoDArT	TGCAGCAGTCTGTGAACAGCAACCCAAAGGAAAACGGAACAGGTAAAAACGCCGCTGCACTCCTGCAAA	1R	170.77
100084547|F|0	SilicoDArT	TGCAGCTGAAACGGCCCTCTCCGACTGCCACCGACGTCCTCCAGCCTTGCTTTGGCAGCCTTGGTCAAG	1R	170.77
100084547|F|0--6:T>A	SNP	TGCAGCTGAAACGGCCCTCTCCGACTGCCACCGACGTCCTCCAGCCTTGCTTTGGCAGCCTTGGTCAAG	1R	170.77
100000088|F|0	SilicoDArT	TGCAGGTCATACAGTACTAATTAGTTGGTTTTCATGATCACCGAGATCGGAAGAGCGGTTCAGCAGGAA	1R	171.93
100007368|F|0	SilicoDArT	TGCAGAACGGGCAGCAGCAGCACCTGACCTTCACCCGCTGCTCCAACGCCAGGGCCAGCTTCCTCAGGG	1R	171.93
100007549|F|0--38:T>C	SNP	TGCAGCCATACACCCACGTACGGTTCTGCTAGGATGAGTCATGCGTGCATGCATCAAATTTCACGTACG	1R	171.93
100010142|F|0	SilicoDArT	TGCAGGTTGATGGCCTCTGCATCCCGAGCGTGTCGAAGTTATATAGGAAGGATGGGCAATTTAACCTGA	1R	171.93
100016918|F|0	SilicoDArT	TGCAGATGGACTCACACGCGGCTCCCCTTTACACTTGTTTATTGCATGCAGCTTCTTCACCCCTTTTGG	1R	171.93
100016918|F|0--22:T>A	SNP	TGCAGATGGACTCACACGCGGCTCCCCTTTACACTTGTTTATTGCATGCAGCTTCTTCACCCCTTTTGG	1R	171.93
100017192|F|0	SilicoDArT	TGCAGATACAGGGGAACAAGAATGCCGCACTACTCCTGCCGAGCAGCAATATTTTGCCCATCAATGTAA	1R	171.93
100017962|F|0	SilicoDArT	TGCAGCTGGACGAAGTCCTCCTTGCCGACATGCCGTGCCCAGCCAACCACCAGCGATCTTACTCCGCTT	1R	171.93
100019267|F|0	SilicoDArT	TGCAGATGGACTCACACGCGGCTCCCCTTTACACTTGTTTATTTATTGCATGCAGCTTCTTCACCCCTT	1R	171.93
100026063|F|0	SilicoDArT	TGCAGCGTCACGCCCTGCACGCTCACCCCCCTGCACTCCTCGAAGTGCACCGCCTGCAACAACAGCAAC	1R	171.93
100026124|F|0	SilicoDArT	TGCAGTCTGCCCCAAACTCGATACTTGGGTATTGATCTGTAAAAAAGAAACACCAGTACGAGATAGCTT	1R	171.93
100028706|F|0	SilicoDArT	TGCAGCGTCACGCCCTGCACGCTCACCCTCCTGCACTCCTCGAAATGCACCGCCTGCGACAGCAACAAC	1R	171.93
100032061|F|0	SilicoDArT	TGCAGGTTGATGGCCCCTGCATCCCGTGTGTGTCGAAGTTATATAGGAAGGATGGGCAATTTAACTTGA	1R	171.93
100045958|F|0	SilicoDArT	TGCAGCTGGACGAAGCCCTCCTTGCCGACATGCCGTGCCCTGCCCACCACCGAGATCGGAAGAGCGGTT	1R	171.93
100062436|F|0	SilicoDArT	TGCAGGAGAAGGTCACCGCCCGCTTCGACGCCGACGTGCCGAGATCGGAAGAGCGGTTCAGCAGGAATG	1R	171.93
100064062|F|0	SilicoDArT	TGCAGAACACAACACTGAGAGTGCCTAGAAATCGGAGACAGAAGCATCGAGAGTGCCTAGAGATTGCAA	1R	171.93
100008426|F|0	SilicoDArT	TGCAGGCTATCCACATTAGCCATCTACTGTGTGTCCATGTCATCATCAGTTTCCACGGCACTGCCTCCC	1R	173.64
100012472|F|0	SilicoDArT	TGCAGAAAGATTTGGGAAGACCTACCGAATTACTGATGGATTCAGACTGCCGAGATCGGAAGAGCGGTT	1R	173.64
100018655|F|0	SilicoDArT	TGCAGCTGCCATCTGTTCCTCCTTCCTTTCCCTCGGTGGCTCTCCGAGATCGGAAGAGCGGTTCAGCAG	1R	173.64
100021429|F|0	SilicoDArT	TGCAGAAAGATTTGGGAAGACCTACCGAATTACTGATGGATTCAGATCGCGTCGCACCTGCCGAGATCG	1R	173.64
100022272|F|0	SilicoDArT	TGCAGGGAGGAAAAATTGTTCTCTCGATCGCTCATGCTGGGACGAACCAATCGTTGCTCGGGCTCCTCC	1R	173.64
100038109|F|0	SilicoDArT	TGCAGTCCCGCGTTTGCACGCAACACATAGTTAGCCAGCTTGGTGCGTTGACGCCACCGAGATCGGAAG	1R	173.64
100038109|F|0--21:A>C	SNP	TGCAGTCCCGCGTTTGCACGCAACACATAGTTAGCCAGCTTGGTGCGTTGACGCCACCGAGATCGGAAG	1R	173.64
100050959|F|0	SilicoDArT	TGCAGGCGTACTGCTCGAATGGATCGTCGACACAAAGTGCCGCCGCACGGTCAAAAACCTTTTGTTTTT	1R	173.64
100050959|F|0--7:G>C	SNP	TGCAGGCGTACTGCTCGAATGGATCGTCGACACAAAGTGCCGCCGCACGGTCAAAAACCTTTTGTTTTT	1R	173.64
100052279|F|0	SilicoDArT	TGCAGCCCACCAAACCGCCCGTGCGACCCAATCCGAGATCCGACTCGCCGTGCATTGCACCGAGATCGG	1R	173.64
100055917|F|0--23:C>G	SNP	TGCAGGACGGCTCCGCCGCCACGCCTTCGGGAAGATCAGATTGGCAGCTCAATACGTCGATCCAGCCGT	1R	173.64
100004148|F|0	SilicoDArT	TGCAGATAAGTTTGAGTTAGATGAAGCGGCCAAGCCAACTTCTACTTGAAGTGACACTGAGCTGGACGC	1R	174.78
100004450|F|0	SilicoDArT	TGCAGGATTGAAAGAGGAATCAGGAACAACGTGAAGGATTAGCACGTCGTAACCATGCAAGCACTTCCG	1R	174.78
100008298|F|0	SilicoDArT	TGCAGCAGGTGGCGGCCCTTTTGACCTTGTTGAACACCGAGATCGGAAGAGCGGTTCAGCAGGAATGCC	1R	174.78
100008769|F|0	SilicoDArT	TGCAGAAATTTAAAATGTTTTTGTGGTGATAGCGGTACTGTTGATACCGAGATCGGAAGAGCGGTTCAG	1R	174.78
100009494|F|0	SilicoDArT	TGCAGCAGACGTCTCATACATATCGAGTTCGTGTGATCAGGTCCGTCGCTTTCATATCTGCCGAGATCG	1R	174.78
100014725|F|0	SilicoDArT	TGCAGGCGCGAATCTTCATGTGCTCCGATGGTGCAGATAAAGGGAGCATTTGAGCCCGAGATCGGAAGA	1R	174.78
100014731|F|0	SilicoDArT	TGCAGTGGTATTTCCAGCCGTATCCGCACCGTACGTCAACTTAAAGAAAGGATCCCATCGAGTCATTAT	1R	174.78
100020156|F|0	SilicoDArT	TGCAGCTTCCAGGTTCTTGTCGGCGATGCGCAGCTTGACACTCTCCATGGAAGACATCTCGCTCAGCTT	1R	174.78
100040062|F|0	SilicoDArT	TGCAGCATCAATTGCCTCTGTGGTGTGGGCTTCTTTCTTCTAAGGCTGGAGAAAAATGGACGGCCAAGA	1R	174.78
100044276|F|0	SilicoDArT	TGCAGCGGCAGGCACGGGACCCAAATCTACTGCACCATTTGTGCGTCCATTTGTGGAACCTCCTCCAGG	1R	174.78
100083604|F|0	SilicoDArT	TGCAGGGCGGCACCCATCGGCATGGGCCAGCAGCACGCCATCGCCGAGATCGGAAGAGCGGTTCAGCAG	1R	174.78
100084672|F|0	SilicoDArT	TGCAGCCGTCGGGTGAACGCTGCCGCTCCTTTTGGCGTCGTCAGTCAGCCAGATCTGACGCGTCGAAGT	1R	174.78
100086478|F|0	SilicoDArT	TGCAGCTTCAGCCTGTTGGCGACTGTAATCACGCGGTGGTGCAGGTCCAGTGGAGGACGACACCGAGAT	1R	174.78
100087562|F|0	SilicoDArT	TGCAGGAACAATACTCGCGGCGGTGTGGGCGTGATCGATAGCTGCTGGCACCTGAGCCTGCTTGGTCTG	1R	174.78
100133752|F|0	SilicoDArT	TGCAGCCTCAGCCTGTTGGCGACTGTAATCACGCGGTGGTGCAGGTCCAGTGGAGGACGACGCCGAGAT	1R	174.78
100146543|F|0	SilicoDArT	TGCAGACGCACTCATTGTCCATCCGAGATCAGAAGAGCGGTTCAGCAGGAATGCCGAGACCGATCTCGT	1R	174.78
c11989_492	SNPe		1R	174.78
wPt-344173	DArT		1R	174.78
tcos3564	STS		1R	175.33
100002762|F|0	SilicoDArT	TGCAGAATCTGTCAAACATCACTAATACTGATTACACTACAAAAAGGACGCTACAAGCAATGTCGTTAT	1R	175.91
100004028|F|0	SilicoDArT	TGCAGTTTGGCCCATATCAAGGTAACACGAGAAGGAGCCGAGATCGGAAGAGCGGTTCAGCAGGAATGC	1R	175.91
100005497|F|0	SilicoDArT	TGCAGGAGGAAACAAAACTGAAGGAACTTTTAAAACCGAGATCGGAAGAGCGGTTCAGCAGGAATGCCG	1R	175.91
100006299|F|0	SilicoDArT	TGCAGTCAGTGCTTAATTAGCACAAGCAAGGGAGAAAAGAACAAGGGCCGAGCGGATTGTTGCACTGAC	1R	175.91
100006299|F|0--23:A>G	SNP	TGCAGTCAGTGCTTAATTAGCACAAGCAAGGGAGAAAAGAACAAGGGCCGAGCGGATTGTTGCACTGAC	1R	175.91
100013694|F|0	SilicoDArT	TGCAGCCTCTCACTTCACTGTCGACGACACTGCTCCAACCCGTCTTTGTCCAGTACCGAGATCGGAAGA	1R	175.91
100013694|F|0--22:G>A	SNP	TGCAGCCTCTCACTTCACTGTCGACGACACTGCTCCAACCCGTCTTTGTCCAGTACCGAGATCGGAAGA	1R	175.91
100017607|F|0	SilicoDArT	TGCAGTACCAGGGCCAGAGCACCTTTTCCATGGCGTCCTCCAGCGAAAGCAGTGTTGTGGGCCTGCCGA	1R	175.91
100017935|F|0	SilicoDArT	TGCAGCATATGACACTTGAACTGAAGATACAGTCAAGAGCTGATGAGGTCAAAAAACAATGCAGTCAAG	1R	175.91
100017935|F|0--56:C>T	SNP	TGCAGCATATGACACTTGAACTGAAGATACAGTCAAGAGCTGATGAGGTCAAAAAACAATGCAGTCAAG	1R	175.91
100020699|F|0	SilicoDArT	TGCAGTACGTAGTAATTATTCAGTTACCATTTCTGCGAATGCATAGAAAATATGTTGCAAGTCAAACAC	1R	175.91
100021685|F|0	SilicoDArT	TGCAGACTCAGGTTCTGCATCACGGAGAGGCCGAGGAGCCCTTCGCTGTTGAAGTAGGGATGCGCCAGC	1R	175.91
100021754|F|0	SilicoDArT	TGCAGCAGCTCGCTTTTCCGCTCCTACGTATCATTTGGCCGAGATCGGAAGAGCGGTTCAGCAGGAATG	1R	175.91
100022176|F|0	SilicoDArT	TGCAGCTCTTTCTTCGGTTGCCCGCCTATGTGTCGCGTTCGGCGACATACTGTTGAGCAAACGCACAGG	1R	175.91
100027321|F|0	SilicoDArT	TGCAGATATGGATTAATTCATTTCATGGCAGATGCCGAGATCGGAAGAGCGGTTCAGCAGGAATGCCGA	1R	175.91
100034322|F|0	SilicoDArT	TGCAGATCAGCAGGAGACACTGTGTTGGCAGAAGTAAAGTTGTCAATGCACTCGTGGCAGATAAACAGG	1R	175.91
100043173|F|0	SilicoDArT	TGCAGAATGCGTTTCCTCTGTACAAGGCGAAACACAGCTACAGAGTGCGCGCTAGCTGTTCGATGGAAT	1R	175.91
100054976|F|0	SilicoDArT	TGCAGACTCAGGTTCTGCATGACTGAGAGGCCGAGGAGCCCTTCGCTGTTGAAGTAGGGATGCGCCAGT	1R	175.91
100075299|F|0	SilicoDArT	TGCAGCAGCTCGCGCTCGTCTGCTCCTACGTATCCTTTGGCCGAGATCGGAAGAGCGGTTCAGCAGGAA	1R	175.91
100128905|F|0	SilicoDArT	TGCAGGTATCAGAAGAAATATCTGAGCCGAAATCGGAAGAGCGGTTCAGCAGGAATGCCGAGACCGATC	1R	175.91
100129333|F|0	SilicoDArT	TGCAGGGGACAAATCGCCTCCGAGATCGGAAGAGCGATTCAGCAGGAATGCCGAGACCGATCTCGTATG	1R	175.91
100134793|F|0	SilicoDArT	TGCAGCAGTAGGTGGCGAGGAAAACCGAGATCGGAAGAGCAGTTCAGCAGGAATGCCGAGACCGATCTC	1R	175.91
c2246_416	SNPe		1R	175.91
tcos103	STS		1R	175.91
100015077|F|0	SilicoDArT	TGCAGGAGCCAACGTGGCAAAGTCGCGGGAACACATAGGCGTACAAAATGGCACTAAAAGCGCGATGAA	1R	176.47
100031419|F|0--20:C>G	SNP	TGCAGCGAGGTTTGACGAACCGAAGAGGGGAAACCCAAAACTCCGAGATCGGAAGAGCGGTTCAGCAGG	1R	177.02
c11495_1518	SNPe		1R	177.02
100014352|F|0	SilicoDArT	TGCAGATGGATGTCGTACGGAAATCGTATAAAAGTTCTCGTACGTGTAGCAGGTCTCTTGATCTAGTCC	1R	178.15
100015287|F|0--10:T>C	SNP	TGCAGCAGTTTGATTGGGAGGTGCCAGATTGGGTCATTGTTCCGAGATCGGAAGAGCGGTTCAGCAGGA	1R	178.15
100018080|F|0	SilicoDArT	TGCAGGAGAGGTGCTAAATGTGAGCTTTAGTCAAAGATTTTCATACTGTGAAATGTTATCTCTGCACAT	1R	178.15
100025980|F|0--29:T>G	SNP	TGCAGCAGCTATTCGGTGCTTAGGCGAAATGTCATTAAACATCCGAGATCGGAAGAGCGGTTCAGCAGG	1R	178.15
100027035|F|0	SilicoDArT	TGCAGTAACGAAATAGAAGCAGGTCTCGCCTCAGCGAGCATCACACACGCATAACTACTATTGAGCCGA	1R	178.15
100028222|F|0	SilicoDArT	TGCAGATATGCACTTTTATTAAGACTAAGACAAGCTGTCAGGCAGTACATTTAGAGTGTTTGTACAACT	1R	178.15
100028683|F|0	SilicoDArT	TGCAGTTCATGCAATGTAAAGTCAAATAGTTTTAAAGTATCATCACTATCAGACAAGTTCAAAGATAAG	1R	178.15
100029884|F|0	SilicoDArT	TGCAGCTCCCTTCTGCCAGGGCCGCCGTGCCAGGCGAGTGCAAGGGCGTGCTGCTCAACTTCGATGATG	1R	178.15
100029884|F|0--24:C>T	SNP	TGCAGCTCCCTTCTGCCAGGGCCGCCGTGCCAGGCGAGTGCAAGGGCGTGCTGCTCAACTTCGATGATG	1R	178.15
100032481|F|0	SilicoDArT	TGCAGCAGCTATTCGGTGCTTAGGCGAAAGGTCATTAAACATCCGGTGTATTCTAATTCAAAAAAAAAA	1R	178.15
100032873|F|0	SilicoDArT	TGCAGCCGCAGCCAAGCCATGCTTTTCTCAGGACAGCAAAGCGTATATGTGCACGCTGGTCGACCGTGC	1R	178.15
100034093|F|0	SilicoDArT	TGCAGGCGCAGCCCAACCGCCTGCTGATCGTATCATCGCCGAGATCGGAAGAGCGGTTCAGCAGGAATG	1R	178.15
100034093|F|0--17:C>T	SNP	TGCAGGCGCAGCCCAACCGCCTGCTGATCGTATCATCGCCGAGATCGGAAGAGCGGTTCAGCAGGAATG	1R	178.15
100038589|F|0	SilicoDArT	TGCAGTAGCGAAATAGAAGCAGGCCTCGCCTCAGCGAGCATCACACATCACTACTATTGGGCCGAGATC	1R	178.15
100049834|F|0	SilicoDArT	TGCAGTCCCACTCGCTGTCCATCCATGCAAGAAAGTCTCTCGTCCGAGATCGGAAGAGCGGTTCAGCAG	1R	178.15
100073976|F|0	SilicoDArT	TGCAGGCTGCTGCCGCCGCCCTCGCTCTGATAGCCATCGCCGAGATCGGAAGAGCGGTTCAGCAGGAAT	1R	178.15
100032481|F|0--43:C>T	SNP	TGCAGCAGCTATTCGGTGCTTAGGCGAAAGGTCATTAAACATCCGGTGTATTCTAATTCAAAAAAAAAA	1R	178.15
100011584|F|0	SilicoDArT	TGCAGTTACTATTGCTGTAGCTTCGTACTACTACTTCCCTAATAACCCACCAGTTGCATGTAGATTTGA	1R	178.7
100011955|F|0	SilicoDArT	TGCAGAGCATGGCGTTGGTGAAAGCTAAGGAAACGCCAACAACATTGGCGTTCCGTGCTCAGCCACATC	1R	178.7
100018065|F|0	SilicoDArT	TGCAGCTTTTCTCATTAACACTTCAGTTATTTGTACATCAACAAGAGAAACGAAAAATCCTCCACGCCG	1R	178.7
100022387|F|0	SilicoDArT	TGCAGCAAAAGAAATAGTGATTTGTTATCGTGCATGCATCTGGTTACTATCAGCATGATTTTTATGTAT	1R	178.7
100026832|F|0	SilicoDArT	TGCAGACTGATACAATAAAGCAGCAATAATGAATTCAGGCCTTTCTTGTTGTACTCATGGCGAGCCGTT	1R	178.7
100028175|F|0	SilicoDArT	TGCAGGCAGGCACACGCCCATGGAGACGCGAAGCACGTGATGATGGAGCCATGTCCGTATAGTCCACGC	1R	178.7
100032801|F|0	SilicoDArT	TGCAGGCACGCACACGCATCCATGGAGACGCGAAGCACGTGACCGAGGCATGTCCGTCTAGTCCACACG	1R	178.7
100037105|F|0	SilicoDArT	TGCAGCTCTTTCTTCGGCTGCGCGCCTATGTGTCGCGTCCTGCGGAACGTTCTATATGACGCATTCTGC	1R	178.7
100037105|F|0--38:C>T	SNP	TGCAGCTCTTTCTTCGGCTGCGCGCCTATGTGTCGCGTCCTGCGGAACGTTCTATATGACGCATTCTGC	1R	178.7
100039853|F|0	SilicoDArT	TGCAGGCACGCACACACACATCCATGGAGACGCCAGGCACGTGATGGAGCCATGTCCCTATATTCCACA	1R	178.7
100040940|F|0	SilicoDArT	TGCAGAAGCATGGTATGCCAAACAATGGCGCCTGCAACCTCTGCAATCAGGCAACCGAATCGCCGAGAT	1R	178.7
100086049|F|0	SilicoDArT	TGCAGTTAGATGCCAAACCTCCCGCGCAAAGGGGCAATGCAGCAGAAGGTGAGCCGAGATCGGAAGAGC	1R	178.7
rPt-505589	DArT		1R	178.7
100019731|F|0	SilicoDArT	TGCAGAGGACCTGTACCTGAACCAGGAGGAACCAGAGTTTTGGATTTCGGCCGAAAAACACAATTTTCG	1R	179.26
100031174|F|0	SilicoDArT	TGCAGGTCGCTGCAAAGGCTTGACTATGGAAACCCCAGCCAGCTCGTCATAAGATTCCACCTCAAATCT	1R	179.26
100046847|F|0	SilicoDArT	TGCAGCTACGCATTATTCTTCTCCCTGGTACGAAGTGCCCGTCGTCGCCGAGATCGGAAGAGCGGTTCA	1R	179.26
100050612|F|0	SilicoDArT	TGCAGTTTTTTTATGCAAGAAGTGTCGTTGTCCTCAATCCGACGACGCATCCGAGATCGGAAGAGCGGT	1R	179.26
100057685|F|0	SilicoDArT	TGCAGCAAATAGGCTCCATCATAATCGGCTAGATGCGGGCAGTGTTGCACCTGATCTTGGTGGGCTACC	1R	179.26
100086688|F|0	SilicoDArT	TGCAGCCAGGAGTAAAGGGATGAGACAGGGGAAGCTCACCACACGTTGGAGATGCTTGCGACGAGGAGC	1R	179.26
100009806|F|0--16:C>T	SNP	TGCAGGGAGCTGCTCCCTGGGGATAATCCCAAGCTCGCCGAGATCGGAAGAGCGGTTCAGCAGGAATGC	1R	179.82
100010611|F|0	SilicoDArT	TGCAGTCCCTCCCTCAAGGATTACATCGCCTTTCTTCTCTCAAAGAATTACTAGTCAACGGTTGTCTTC	1R	179.82
100011247|F|0--22:T>C	SNP	TGCAGTAGTGCGATCAGTTCGGTACAGTCTGATTCCACCTCAGGAGGTTGCTTGGACCAGTGCAACGCC	1R	179.82
100011961|F|0	SilicoDArT	TGCAGGCCGCCTCCCACCTGCTCCTGCTCAGCTCCGCCTTCCGAGATCGGAAGAGCGGTTCAGCAGGAA	1R	179.82
100020443|F|0	SilicoDArT	TGCAGATATCGTGTGGCAGTCCGTCAGTGCAATCTTCAGGAGATACTACTGTACTTGTAACAGCTCCCC	1R	179.82
100020476|F|0--22:G>C	SNP	TGCAGCCTCACCCTGCAACTGCGTCAGTTCATTCAGAACACTGCTCTGCTCAATGCTCTGTTCTGAATG	1R	179.82
100021476|F|0	SilicoDArT	TGCAGCATCAACAGCTCAAATGGTTCTTTACAAGTAGCAGGAGTACCTATATCAGTAACCTTGCTTGCA	1R	179.82
100023029|F|0	SilicoDArT	TGCAGAGCAGGCCTTGGTTTGGGTATCAGACACCTTGCTACTGCCTCCTGCCTGATCACTCCCCCTTGC	1R	179.82
100026523|F|0	SilicoDArT	TGCAGGCAGAAGAACCAGGCCCTTCGTCATAAAGAAGTTAAGTTTCCGCAGTGATCTGGATGATGGGAA	1R	179.82
100033063|F|0	SilicoDArT	TGCAGTTGCGCCTCACAAAATACTGGTGTCTTCGTCTACCTCTCTCTCGTTCGTCTCCCTCGTGTTCGC	1R	179.82
100035381|F|0	SilicoDArT	TGCAGAACAAGCTGTTGAATTGATTGGTTCCCATCCCAGTAGGGCCGACCATATGTTGCATGTGCTCGT	1R	179.82
100056713|F|0	SilicoDArT	TGCAGGCCTTGTTGGAGGAGCTGAGCAAGAAGGCCGACGAGGCGGAGGACTTGCTTGATGAGCTCCACT	1R	179.82
100074476|F|0	SilicoDArT	TGCAGCCACGCGCCGCCATGCCCCGCACCAACATGGCGCCTCCACCCAACGGCCGTGTCACGCGCCACC	1R	179.82
100078292|F|0--60:A>G	SNP	TGCAGCTCCCGCAGCTCCCTCTTGACGCGGCCCAGCTCGCGCATCACCTCGGCGTACGTCACGCCGCCG	1R	179.82
100084558|F|0	SilicoDArT	TGCAGCTCCGTCGAAGCATTTCTACTTTGCTTGGACGAGGTGCATCTGCATTGCCTGCCCGAGATCGGA	1R	179.82
100097410|F|0	SilicoDArT	TGCAGAGAAGGAGGAGGTGGTGGTGCTCTGCACGTCCCTGAAGCCGCCGCTGACCTCGGCCCCACCGAG	1R	179.82
100144109|F|0	SilicoDArT	TGCAGCCGCAACTCGTCCCGAAATCGGAAGAGCGGTTCAGCAGGAATGCCGAGACCGATCTCGTATGCC	1R	179.82
c5573_767	SNPe		1R	179.82
100007038|F|0	SilicoDArT	TGCAGGCCAACGGGAAAGCTAATGATACATCTCGATCTGTACCTGGAGGCAACCGACAACCAGGAAGAC	1R	180.38
100012098|F|0--54:T>G	SNP	TGCAGACTATGCAAGGAGTAAAAGTGAAAGCCATGGCACCAGCCGCTTGCCACCTCCAACCCAAGACAG	1R	180.38
100021165|F|0	SilicoDArT	TGCAGGTGGCGCCTCTGCCCTTCCTCCACTATCTCGAGCAGCTTATACTTGGTGGCCACGTACACGGCC	1R	180.38
100038414|F|0	SilicoDArT	TGCAGGCCAACGGGAAAGCTAACGATACATCTCGATCTGTACCTGGAGGCAACCGAGATCGGAAGAGCG	1R	180.38
100079546|F|0	SilicoDArT	TGCAGTTGGACTGCCTGTGCTGGATCGGTGAAAAAGAAGTGACCCGAACAGGAACGTGTGGTTTTCCGA	1R	180.38
100005598|F|0	SilicoDArT	TGCAGACATGCTTAATTCAGGCCGTCATCTAGTCCTGGCCCCGCTACTCATTCAAGACGCTGATCAGTG	1R	181.5
100088046|F|0	SilicoDArT	TGCAGATGACCTGCAACCTCGGGTCCATCGTGGGGGGCTCCTTCGGCGTGCTCCTCGCACCGAGATCGG	1R	181.5
100129806|F|0	SilicoDArT	TGCAGGCTCGATCTGGTCGTGCGCTCGTCTCCGCCCCCAGAACCCGCAGATCCTCATCTTCCCGACCGA	1R	181.5
100016909|F|0	SilicoDArT	TGCAGGGATCAGATATAAAAGGTAGTTCTTGGTTGCCCGAGATCGGAAGAGCGGTTCAGCAGGAATGCC	1R	182.06
100006054|F|0--60:G>A	SNP	TGCAGCTCACATTCCTGATGCGAGCATGCCGTCAAGTTGGATGGACCCACGTTTAGCTTCGGAATTTGT	1R	182.63
100013497|F|0	SilicoDArT	TGCAGCTTTGAGTTCTGTAAATTCAACCAATCGGAGAATCCTTGGCTCCAGCCTGGTAGCCGAGATCGG	1R	182.63
100021443|F|0	SilicoDArT	TGCAGATGCCGTGCGACCGCGAGAACTTCTACCCGTTCCCGCCATTCATGTCCGAGATCGGAAGAGCGG	1R	182.63
100038501|F|0	SilicoDArT	TGCAGCAAGCTCTTCCTCGTGCACAACGACAAAGGGTCCTCGTGCTCGCTGATGAACCCTCTGGCGCGG	1R	182.63
100048940|F|0	SilicoDArT	TGCAGGGCCACGTGAACCCGCTACTCCGCCTCGGCCGACGCCTCGCCGCCAGGGGCATCCACGTCACCT	1R	182.63
100070475|F|0	SilicoDArT	TGCAGCGCGTAGACGGTCCGCAGCAGGTGCCGCCGCTCGTACTTGCCCGAGATCGGAAGAGCGGTTCAG	1R	182.63
tcos233-1R	STS		1R	182.63
3582444|F|0--11:G>C	SNP	TGCAGCGCGTAGACGGTCCGCAGCAGGTGCCGCCGCTCGTACTTGCCCGAGATCGGAAGAGCGGTTCAG	1R	182.63
100003702|F|0	SilicoDArT	TGCAGTAGGAAACAACCATCACGGAACATGATAAACGCAAACTGAAGACCTTCCTTATTTACCGTCGCC	1R	183.77
100017593|F|0	SilicoDArT	TGCAGGCTAATTAATCTAAGAAAATATAGTACTGTAAAATATAGTGGAGTCGAGGAGGCAAGAGGATGG	1R	183.77
100033913|F|0--29:T>C	SNP	TGCAGCGCCTCGCGCTCAAGAAGGTCCGTTCCATCGTCTCTACACATCTTCTCACCGCCCCGCTAGATC	1R	183.77
100035073|F|0	SilicoDArT	TGCAGACTTGGACAACTGATTTAGCTGGTTTTGGAACAAAAAGTCGCTCTCTTCGGCTTAGACCAGTGT	1R	183.77
100035080|F|0	SilicoDArT	TGCAGAAATCCACCGATGCATCCGCTCTGAACTTTTGCTCCTGAACCAATGCTGGGCAGAGGACGAACA	1R	183.77
100057269|F|0--19:C>G	SNP	TGCAGAAAGCCGAGGCGGCCACGCAGGAGAAGAACCGAGATCGGAAGAGCGGTTCAGCAGGAATGCCGA	1R	183.77
100072392|F|0	SilicoDArT	TGCAGCCCTCATTCATCTTTTTTTGCTCTCAATTTTTTCCCAGGCCTGCCTGCCTGCCCTGGATGAGAA	1R	183.77
KUR1001-1R	STS		1R	184.33
rPt-390497	DArT		1R	184.33
TC3185g-1R	STS		1R	184.33
100007018|F|0--19:T>C	SNP	TGCAGGACATCGTACACCGTATACATTCCCTCTTGCCGAGATCGGAAGAGCGGTTCAGCAGGAATGCCG	1R	186.09
100044872|F|0	SilicoDArT	TGCAGGCGACTCGTACCCAGCGAGGACACCGTCCCCGACACACGGGCCTACATGGCCAACCGAGATCGG	1R	186.09
100076327|F|0	SilicoDArT	TGCAGGTGGGAGGTGGCGATGAGAAGGCGAGCTGGACATAGCGATCTCGCCTGTTGCCTTGCGAAGATT	1R	186.09
100004414|F|0	SilicoDArT	TGCAGAGCATCTATTCCCCGCTCCTGGACTTTTAACTAGCGCTCCGCCAACTTCCGAGATCGGAAGAGC	1R	186.66
100013231|F|0	SilicoDArT	TGCAGCGTACTAGGCCCACATCAAAATCAAATGGAGTAAGTATATTTTCCGAGAGACACACACACAGGA	1R	186.66
100013648|F|0	SilicoDArT	TGCAGCTGCCTCATCAGACAAGAGGGCGCACGGGAAGCTGTATTCTTCCTTTAATTTCCGAGATCGGAA	1R	186.66
100016912|F|0	SilicoDArT	TGCAGCTGCTGTGGTGCCATTTTCTGGAGCGCGAGTGGGACCGAGATCGGAAGAGCGGTTCAGCAGGAA	1R	186.66
100018622|F|0	SilicoDArT	TGCAGGACAGGTACTTCTCAATTCCTCTGCACAAACCTGCCAACAAATTAAGCATACATGAACAGTACG	1R	186.66
100019698|F|0	SilicoDArT	TGCAGCCGCACCTCCAGACCATCACGGACACCCTCCAGGTAACCACCCCGAGATCGGAAGAGCGGTTCA	1R	186.66
100024390|F|0	SilicoDArT	TGCAGAGCAAGAACCACCCAACAACAAACGCATCAGCAAAGGGCACGACAGACCACGATGATGTGCGAA	1R	186.66
100027850|F|0--25:G>T	SNP	TGCAGGTGGGAGGTGGCGATGAGAAGGCGAGCTGGACATGGCGATCTCGCCTGTTGCCTGAGCGCTTGC	1R	186.66
100028760|F|0	SilicoDArT	TGCAGGACGTTGAAGTACGCAGCAATGTTCTCCTTGAGCGTTTCCACACCAGGCAAATCTCCGCTCCAG	1R	186.66
100031092|F|0	SilicoDArT	TGCAGCCTCTACCACTGCTGCTTGATACCCTCGCGCCGCCGCTACCACTGTCGCAGGTTGCCCTGGCCT	1R	186.66
100033812|F|0	SilicoDArT	TGCAGGCATCGTGATGCCCATATCGGCATCACCACTGGCGCCATTGTAGGATGACGCGTATCTCGCCAG	1R	186.66
100036510|F|0	SilicoDArT	TGCAGCGCACGCACCAGGAACCATTAATTAACAGATGGTGGCAGAGGAAAATTAGGAGGGAAATTAAGC	1R	186.66
100061740|F|0	SilicoDArT	TGCAGCCGCACCTCCAGACCATCACGGACACCCTCCAGGTAGGTACGCCGAGATCGGAAGAGCGGTTCA	1R	186.66
100117196|F|0	SilicoDArT	TGCAGTCGCAAGAGACGGCCAGCGGCGGCGCGATCCGAGATCGGAAGAGCGGTTCAGCAGGAATGCCGA	1R	186.66
100132933|F|0	SilicoDArT	TGCAGCGGCGACCCGCCGTTCGCGCTCGTGGGCAACTACTCTGGCCTCGCCTGCCAGCCCGTCTGGAAC	1R	186.66
100048650|F|0	SilicoDArT	TGCAGTGCAGTGCAGTCGAACGGACGAAGGCCACACACACATACACCGAGATCGGAAGAGCGGTTCAGC	1R	187.21
100049766|F|0	SilicoDArT	TGCAGCTGCGGGTCAAGCTTCCACCTGAGATGTTTGGTGAAATGTCAAAGAGAAGAGGAGGAAGAGAAG	1R	187.21
100082356|F|0	SilicoDArT	TGCAGCGCCGTGCAGGCGAACGGACGAAGGCCACACACACACATACACCGAGATCGGAAGAGCGGTTCA	1R	187.21
c3364_628	SNPe		1R	187.21
100019543|F|0	SilicoDArT	TGCAGGTCAATTAGAGAGTGTTATTCAGGTAAACAACAGCCATCCATGGAAAAAGGCTGGAGCACCAAA	1R	187.77
100080322|F|0	SilicoDArT	TGCAGGACAGGAGAGCGGCGCGCCACAGATCAAGTTGCCGAGATCGGAAGAGCGGTTCAGCAGGAATGC	1R	187.77
100004695|F|0	SilicoDArT	TGCAGACGCTGCATGGTGTGAAGCCCCCAGGAAAAGGACAGTGGTATCAACACAACTGTCCACTGCGCA	1R	188.33
100004695|F|0--40:G>A	SNP	TGCAGACGCTGCATGGTGTGAAGCCCCCAGGAAAAGGACAGTGGTATCAACACAACTGTCCACTGCGCA	1R	188.33
100015583|F|0	SilicoDArT	TGCAGTAAACTATTTCCAGCTTAGAGCATCTACAGTGGAACATCTCAAACCGACTTCGTACGTTCGGCC	1R	188.33
100023168|F|0	SilicoDArT	TGCAGCTTGCACCACACACGATCAAAACAATCGTTCTCTCATGTATGTTACTGTCTCCATCAAACACCC	1R	188.33
100027095|F|0--68:C>G	SNP	TGCAGGCCAAAGCTCTGGCAACGGATGTCGAGGAACCCGAGATCATGGTTCTGGCTGATCAAGCATACC	1R	188.33
100037332|F|0	SilicoDArT	TGCAGAAGCAGCACCCGCCGCATGTGATCTTGCCATTGATGCATCAGTGTGTATTTTTGCGACCCCCGA	1R	188.33
100058495|F|0	SilicoDArT	TGCAGCGCAACCCTCTCCATTGACAGGTCCACTGCGCACGGACGTTTTGTACGCACAGCCGAGATCGGA	1R	188.33
rPt-390516	DArT		1R	190.64
100007134|F|0--30:C>A	SNP	TGCAGTGAAGTTGCAGCACTTTACACTTTACAGTACAGCAACGAGTAACTGAAACTCTGTGACTGGAGC	1R	192.94
100008997|F|0	SilicoDArT	TGCAGCATCGATGCCCTCTCCGCTACAGCGGTGCTCGACGTCATCCTTTTGCAGCACACCGCTAACAAA	1R	192.94
100014526|F|0	SilicoDArT	TGCAGTGTCTTGTGTCTTCCTTTGCTCTTGTATAAGAACGACCACGCAGAGCTGCTCTCTGATTCTCTT	1R	192.94
100014526|F|0--26:C>T	SNP	TGCAGTGTCTTGTGTCTTCCTTTGCTCTTGTATAAGAACGACCACGCAGAGCTGCTCTCTGATTCTCTT	1R	192.94
100016003|F|0	SilicoDArT	TGCAGGATTCAGTTCAGTTCCGAAATGTACGAACACGTATCTGACATCTATTCCTTGCTGTCTGTCAGA	1R	192.94
[truncated: 48,824 more rows]

## Sheet: Lo7 physical map
Lo7 pseudomolecule	position (Mbp)	DArTseqTM Marker ID	Sequence 5'>3'	identity (%)	overlap (bp)	L2039xDH chr.	map position (cM)
chr1R	0.302185	100036768|F|0--68:A>C	TGCAGTTGTCCACTATCACCGGCATGGTGTGACAGCCTCGGCGAACACGTAGCTTGCAGAAATCCAAGA	100	69	0R
chr1R	0.781226	100027045|F|0--26:C>T	TGCAGCTGCCCGCCGTCGTCAACCGTCGCCGTTTTCACCTTCCCGTAGTCGTTTCAGCTGTCAGTTAAT	100	69	0R
chr1R	1.04303	100012457|F|0--21:T>C	TGCAGATAGGCAGCTAGACTATGGGTGTAGATAAGCAGATATCTCACCTTGCTGGGCACACGGCGGCCG	100	69	0R
chr1R	1.04303	100012457|F|0--53:G>A	TGCAGATAGGCAGCTAGACTATGGGTGTAGATAAGCAGATATCTCACCTTGCTGGGCACACGGCGGCCG	100	69	0R
chr1R	1.40957	3748277|F|0--36:A>G	TGCAGTCCGCCCGCAAGATCCTCACCGACAAGTTCGACGGCGATTTCACTACCGACGCCAAGGTGGGAA	100	69	0R
chr1R	1.9574	100036423|F|0--26:T>C	TGCAGAACGTCTTCGACACTATACTGTTGTATACTCACTAGCTAGATTGACCCTCACTAATATGGTTGT	98.551	69	0R
chr1R	1.9574	3882552|F|0--26:C>T	TGCAGAACGTCTTCGACACTATACTGCTGTATACTCACTAGCTAGATTGACCCTCACTAATATGGTTGT	100	69	0R
chr1R	1.97094	100030290|F|0--14:G>C	TGCAGGACAATCCAGAGAGACCAGGTTGCACAAGCGAGGATGAGAAGGAAGGTGCCTTTGATCCACTCG	100	69	0R
chr1R	2.11639	100024482|F|0--44:A>G	TGCAGATCCCAGTTTGGAGATTGCATCCTAGCATTTCTATACTCACCATGGTTTTGTAAACTTGATGCA	100	69	0R
chr1R	2.16423	3736083|F|0--10:C>A	TGCAGATGCCCCCGAAGCCTTTCGTCTCATCTGAGAATGAACTTATGCCATAAATTAAAACAGGGACTA	100	69	0R
chr1R	2.2368	3593893|F|0--62:G>A	TGCAGATGCCACCAAAGCCTTTCGTCTCATCTGAGAATGAACTTATGCCATAATTTAAAACAGAGACTA	100	69	0R
chr1R	2.24834	3602352|F|0--13:G>C	TGCAGCTGGCCTTGGATTTCTTGGAGCTTGGCTGCCAGGTGCCGCCAGGTCTTGATATGCTTGAGACGC	100	69	0R
chr1R	2.40312	100107681|F|0--16:A>G	TGCAGCTGCTCCTAGCAGCGGCTACAACAGCAGCCACCACGGCGACGACTCCTGGGTGTCGGCCGAGCT	98.551	69	0R
chr1R	2.54067	100105583|F|0--58:A>C	TGCAGCAAGATCAATGGCGTCCACATATGATGCATGCTGACCGTATGTATGTTGGTTTACGGCAAGCAC	98.551	69	0R
chr1R	2.88734	100008697|F|0--25:G>T	TGCAGCGATAGCTATATGCACTTTTGGTTGCGTTGGTGCAAAAGCTATTGCTGCTGGCGCACGCATAGC	98.551	69	0R
chr1R	2.88734	3745741|F|0--25:T>G	TGCAGCGATAGCTATATGCACTTTTTGTTGCGTTGGTGCAAAAGCTATTGCTGCTGGCGCACGCATAGC	100	69	0R
chr1R	2.89334	100017781|F|0--60:C>G	TGCAGAAAAGCAAAGGGTCATGGCACATCTCGAGAACCAGTCCTCTGAAACAACGCACACCATAACGTG	98.551	69	1R	7.5
chr1R	2.89964	100080333|F|0--30:C>T	TGCAGCTTGTTCCCTGAAGACTATGCAATGCCACGGGAGACCCTTGTGCGGCTGTGGGTCGCTGAAGGA	98.551	69	1R	7.5
chr1R	2.89964	3352174|F|0--30:T>C	TGCAGCTTGTTCCCTGAAGACTATGCAATGTCACGGGAGACCCTTGTGCGGCTGTGGGTCGCTGAAGGA	100	69	0R
chr1R	3.2204	100006644|F|0--25:G>A	TGCAGCAAGGAGCAGCAGCATGGTCGTCAGTGCCATACTCATTTGCTGCATGCTGGCCGTCTCAATGTT	100	69	1R	8.06
chr1R	3.77451	100186880|F|0--48:G>A	TGCAGCTTTCAACGGCGGTGAGCAATGTATCCACGGCTGATGGCACCAGAAGGGCGAGGCCAAGCCAGC	98.551	69	0R
chr1R	4.2647	3362508|F|0--29:C>G	TGCAGCTACCATGGATGGATGGATGGATGCTTGATGATTCTTCTATCTTTCTCCTCTCTGCTCCGAGAT	100	65	0R
chr1R	4.29392	3353299|F|0--30:A>T	TGCAGATCACACCAGCTAGCTAGCAGCCGCAGCCAGTGATCAACCGTTCGGAGCTCAAGAGAACTTCAC	100	69	0R
chr1R	4.29626	100033427|F|0--48:C>T	TGCAGGCCGTCAGATTTCGTTCGAAGCGTGGCTCACCCTACGCCCTTGCCCTTCCTTCTGCTCACCCTC	100	69	0R
chr1R	4.56659	100180969|F|0--47:T>C	TGCAGGTCGCTGGTGTAGTGGGTCGACTCGTCCACCACATGGTACGCTGTCTCCAGGCTCATCTTGAGG	100	69	0R
chr1R	4.56707	100073766|F|0--65:T>C	TGCAGCACGGAGATAGGGTTCGTGTAGTGCATCTTGGGTAGCAGAGGCCGCCCGTACTGTGCCAGTGTG	100	69	0R
chr1R	4.56707	100189712|F|0--62:C>G	TGCAGCACGGAGATAGGGTTCGTGTAGTGCATCTTGGGTAGCAGAGGCCGCCCGTACTGTGCCAGTGTG	100	69	0R
chr1R	5.08694	100002426|F|0--48:T>C	TGCAGCTCTTCTTGTATGTTGTTGTTTGTACCAAACAACTGTGCTTCTTTGATGCAGATACCACTGCCG	100	69	0R
chr1R	5.08694	3345550|F|0--48:C>T	TGCAGCTCTTCTTGTATGTTGTTGTTTGTACCAAACAACTGTGCTTCTCTGATGCAGATACCACTGCCG	98.551	69	0R
chr1R	5.7942	100044121|F|0--59:A>C	TGCAGCGAACGTCGCAGTCGCTACGAGAACGGACCCGACACCAACAATCTGTGCGAATGACGTTATTTT	98.551	69	0R
chr1R	5.7942	3582946|F|0--59:C>A	TGCAGCGAACGTCGCAGTCGCTACGAGAACGGACCCGACACCAACAATCTGTGCGAATGCCGTTATTTT	100	69	0R
chr1R	6.19913	100037499|F|0--5:A>G	TGCAGATGCACCCCATTCCTCCTCCTGTACACATCCACCTTGGACTCCGCGGCGACAACCACATACGGG	98.551	69	1R	13.72
chr1R	6.70084	100060632|F|0--18:A>T	TGCAGAATCCGCAACCACAATGGGAGGAACCGTTTGTCTCCCCGGCCTGCTGCCTAGCACGGCCGAGAT	100	65	0R
chr1R	6.76567	3356239|F|0--9:T>C	TGCAGGGACTAACGAGCATGGAAGGGAAGTAAAGGGCAAGGAACATACGAGCGGCAGATTGGGCGCATA	100	69	0R
chr1R	6.76686	100036438|F|0--68:C>A	TGCAGTACAGTTCTCCCTAAGCTAGCAGCTGAAGAGCTGTTAGGAATAAGCCACTCCACGGTGGTGACC	100	69	1R	20.59
chr1R	6.76686	100036438|F|0--29:T>C	TGCAGTACAGTTCTCCCTAAGCTAGCAGCTGAAGAGCTGTTAGGAATAAGCCACTCCACGGTGGTGACC	100	69	1R	20.59
chr1R	6.82848	5216389|F|0--41:T>C	TGCAGCGGCGGACCAGATTGAGATTGAGTGAGAGATCTTTGTTTACGACGGAGAGGAGAGGGGAGGAGA	100	69	0R
chr1R	6.82877	4095364|F|0--61:C>G	TGCAGACCTCGGTCTGGCCCTCCCGGGCCGCGAAGTGCAGCGCGGTGCGCTTGTTGGCGTCCCGCACGC	98.551	69	0R
chr1R	8.1595	100011119|F|0--59:G>T	TGCAGCTATGGTAGGATACATATGTTGCCAAAATTTGAACTTGTGTCACACTGACGGATGTGGATGACA	100	69	0R
chr1R	8.34876	100087706|F|0--40:A>G	TGCAGCTGCTTGTGGCAGCTCCGATGGCCATGGCCCGCTCACCGCGGGCTCTAGAGGAGATGACGCCAG	100	69	0R
chr1R	9.43935	100016793|F|0--59:C>T	TGCAGCCCATGACGTGTGGTGATGGAAAATAGAGTGCTCACCTACCTGTTCATCACCCACATTGTGTTT	98.551	69	0R
chr1R	10.4855	100087321|F|0--14:A>G	TGCAGGTGAGGAGGAACCAATGGGGGCTCTCGAGCTTCGTCTTCGTTTCCAGGGATAGGGTTGCTGTAG	98.551	69	0R
chr1R	11.5847	100151164|F|0--17:T>C	TGCAGCGAGCTGGACCATATATTCGGCGTGCTGGATGCGCCGGGCTACTATGCACGAGGAGTGCAGTAG	98.551	69	0R
chr1R	12.3905	100011205|F|0--65:T>C	TGCAGCACTGGTTGTTGGGGCACTCCAGCCCGCCGTTCTGCTTGCCGCACACCACAGGGCAGTCCTCCT	100	69	1R	28.18
chr1R	12.3908	100001782|F|0--24:G>T	TGCAGCACTGGTTGCGGTCGCACTGGTTGGTTTCACTGCATTTAGCACTATCATAAATGCAGAAGCCGC	100	69	0R
chr1R	12.4415	100068136|F|0--8:T>C	TGCAGCCATGACGGGTACTGCGGGGTCGGCCCTGGTCTCTGCACCAACGGCTGCCAGTACTACTACGGT	100	69	0R
chr1R	12.4707	100040203|F|0--51:A>G	TGCAGTGAAACCAACAAGTGCAGCAACAACCAGTGTTGCGGTCCCACGGGCATATGCGGCGTCGGCAAC	100	69	1R	28.18
chr1R	13.0311	100052363|F|0--21:G>C	TGCAGGACATCGACGGCAGCGGCGGCGACAAGAAGCAGCCCGTCGACTTCATGGAGGCCATCAACTTCG	98.551	69	0R
chr1R	13.0311	3364577|F|0--21:C>G	TGCAGGACATCGACGGCAGCGCCGGCGACAAGAAGCAGCCCGTCGACTTCATGGAGGCCATCAACTTCG	100	69	0R
chr1R	13.2611	4093047|F|0--33:A>T	TGCAGCACCGGCCGTATTCAGAGCTGACTGAAGACCACTCTCCTGCTGGCAGCCACCCTAGTGTTGGTT	100	69	0R
chr1R	13.6363	100017322|F|0--36:T>C	TGCAGCGGAAGAACAAAATAAAAAGAAATAACCACATGTTACCTTCATGCGGTTCACTCACCTGGTAAC	100	69	0R
chr1R	13.6987	3750154|F|0--19:T>C	TGCAGCCAGTATGGATCGATACCGAAACATACCGGGTGGGAACTAGCAGCTAGGATGATTCGAGCAGTA	98.551	69	0R
chr1R	13.6987	5208782|F|0--52:C>G	TGCAGCCAGTATGGATCGACACCGAAACATACCGGGTGGGAACTAGCAGCTACGATGATTCGAGCAGTA	98.551	69	0R
chr1R	13.7	100011015|F|0--25:A>G	TGCAGCGGCAAGGACACCGCCACAGATCAGCATCGCTCTAATGATGCTCCTCGCCCGAATCCATGCCGA	98.529	68	0R
chr1R	14.1015	5217691|F|0--26:A>T	TGCAGTTGCCCTCGGCGGCGGCGACCACCTCGGCAGCCTTCGAGGCGCGGAAGACGGCGGGGAGCCCAG	98.551	69	0R
chr1R	14.8125	100002689|F|0--5:G>C	TGCAGGTGATTTTCTGTGACAATTTCGGTTATTTGTTTTGATCAAAGGAAGCAAGCGTCACAAGGATGA	100	69	0R
chr1R	14.8125	100002689|F|0--61:A>T	TGCAGGTGATTTTCTGTGACAATTTCGGTTATTTGTTTTGATCAAAGGAAGCAAGCGTCACAAGGATGA	100	69	0R
chr1R	14.9507	100170683|F|0--13:C>T	TGCAGGCCCAAGTCGAAACCACAGTTACCATCCTCTTTCGCCACCCGCACGCCCAGACTGAACCTAACT	100	69	0R
chr1R	15.4952	100040713|F|0--68:G>C	TGCAGCCAGGGGAGGATGCAGTCCTCGTGGTAGATGTGGGCGCAGGGCATCTCCCTGGCCTCGGCGCCG	100	68	0R
chr1R	16.1407	100026627|F|0--7:G>A	TGCAGATGAACGGAATTATTGACCTATTATCTTCAAAGATTTGCTCAGCTAGAATTTGATTCTTCTAAT	100	69	0R
chr1R	16.4682	3346786|F|0--19:A>T	TGCAGCTCCATGTTCGCACAGTATTTTCGCAGCCAAGCACAACAGTAGAAGAGGAGAGGACATGCGCCA	100	69	0R
chr1R	16.4912	5035833|F|0--32:C>A	TGCAGAGGAAGCCGAGCAGCAACCGGAGCCTGCACGGCTCGAGACCGTCGTCGACCAAGGGGAACAACA	100	69	0R
chr1R	16.5297	100168998|F|0--34:T>C	TGCAGACCGGTGGCCTCCTCGCACGGTGCCGCGCTCCCGCAGGGTGGCGGGCGGAGATGGCGCACGGTG	100	69	0R
chr1R	17.1529	3736922|F|0--20:T>C	TGCAGCACGGAGCCCAGCTCTTGCGGCAGCCCCGACACCATCGCTGCCACCGCCCCGTGCGTCAGGTCC	100	69	0R
chr1R	17.1717	3363584|F|0--17:C>G	TGCAGTGTTTGTGGGTCCAGTGGGCACAGTGTGCAGAACTGCCCTGAAGTGGCCATGGATATGCAGCAG	100	69	0R
chr1R	19.1593	3593268|F|0--12:G>C	TGCAGATATAATGTGGGCATGATTGCGGTAGTACGCATGCCGTGATGCGTTGCCGATGTCGGCATGGCG	98.551	69	0R
chr1R	19.1593	100006622|F|0--66:G>T	TGCAGCCAGCGTCTGACTTCCGTGTCAACCGAAAGGTCGAGGGTTAATTAAGATTAGAGGACCAAAGGC	98.551	69	0R
chr1R	19.1593	3596741|F|0--66:T>G	TGCAGCCAGCGTCTGACTTCCGTGTCAACCGAAAGGTCGAGGGTTAATTAAGATTAGAGGACCAAATGC	100	69	0R
chr1R	19.815	3597604|F|0--16:G>T	TGCAGCAATGGGCCACGATCCAGTCCACATGTTGCCAACATGCATGCTTGGGCAGCTTGCGGACTTATT	98.551	69	0R
chr1R	20.3287	100169391|F|0--61:G>C	TGCAGCCGGAAGCGCACGATGGAACGAGCAGCTCCGCGCCTACTGTGCCCACCATGCTGCCGACGTCGT	98.551	69	0R
chr1R	20.9252	100019699|F|0--37:T>G	TGCAGGCATGCGCGCCGCCGCCCCTCTGGCCGTCGTCTTTCTCCTCGACTACCTCCTGCTGCCTTGCCT	100	69	0R
chr1R	21.1245	100022080|F|0--26:A>G	TGCAGAGTTTAAATTTGGATTGTGTTAGTAAGTTTTATTAGTTTGCATGGTCTAGGTCTTAAACCTTTT	98.551	69	0R
chr1R	21.1816	100027550|F|0--37:G>T	TGCAGTGGGAAATCAATGGATCAGTCTACATCACTTGGACGTTAGAGCCTGGTGTATAATACATGGTTG	98.551	69	0R
chr1R	21.1816	3906333|F|0--25:C>T	TGCAGTGGGAAATCAATGGATCAGTCTACATCACTTGGACGTTAGAGCCTGGTGTATAATACATGGTTG	98.551	69	0R
chr1R	21.1816	3906333|F|0--26:T>A	TGCAGTGGGAAATCAATGGATCAGTCTACATCACTTGGACGTTAGAGCCTGGTGTATAATACATGGTTG	98.551	69	0R
chr1R	21.1824	100159256|F|0--68:G>A	TGCAGCTCATCAAGATCCAGTGCCCTGCCAGGTAAGGCTTTCTTCACTCTCCCTTAATTTTCCTAATAG	100	66	0R
chr1R	21.4349	100036512|F|0--26:C>A	TGCAGCCTAACAAAGAGGTGAAGGTGCCCCAGACACTGGGAGAGTCCAGACATCCTCCGCCGCTGCGCC	100	69	0R
chr1R	21.6374	100012424|F|0--13:T>G	TGCAGAGGATAGTTAATAGGGCCTCCGCACTGAAAACATGATTAGCAAGGGGGCACGTCATTATGCATA	100	69	1R	33.8
chr1R	21.7698	100077094|F|0--68:G>T	TGCAGTTGTCGACGAGATGGTGGTGCTATCGTACATGTACGCCATGCCGCTGGCGTTTTCGACGAGATG	100	69	0R
chr1R	22.3416	100156700|F|0--29:G>A	TGCAGATGAAAGCAACGAAAGTCAAAACAGAATGTCGACATGTCCCCGGCGTGTCAGCCGTCAGCAGCA	98.551	69	0R
chr1R	22.3416	3745987|F|0--65:C>A	TGCAGATGAAAGCAACGAAAGTCAAAACAGAATGTCGACATGTCCCCGGCGTGTCAGCCGTCAGCCGCA	100	69	0R
chr1R	22.8522	100024806|F|0--63:G>T	TGCAGCTATGGCCACGTACTCGGCCTCACATGAAGAAAGAGCAACAATTTTCTGTTTTTGAGAGCTCCA	100	69	0R
chr1R	22.9399	100158055|F|0--53:T>C	TGCAGGCTGCTTTCGGGCTATGGCGTCACGTACTACTACGAGCGGCAGCTCACTGGCAGTGGAGCGGCC	100	69	0R
chr1R	22.99	100041471|F|0--39:T>C	TGCAGGAAACACCAAATGACACCTCAAGTACGAACCAAATATTTTTACATACGATATAGGATGTTCTAT	100	69	0R
chr1R	23.2926	100085094|F|0--28:T>A	TGCAGTGGGGTCGTTGCGGGCCAATCCATCGTGGCCCATATTCGTCTCATATTTGAGCTGGATATGAGG	100	69	1R	35.54
chr1R	23.7231	100138983|F|0--59:G>T	TGCAGGAAACACCAAATGACACCTCAAGTACGAACCAACCATTTTTTACATACGATATAGGATGTTCTA	100	69	0R
chr1R	24.2012	100034036|F|0--42:C>T	TGCAGTTTCGGAAGTACAGAATCAACTCAGATCCTTCAAAACCATTAGAGTTGGCAAATTAGGGACTGG	100	69	0R
chr1R	24.7293	100129978|F|0--5:T>G	TGCAGTTGGGCTTCTATTTCTTGTAGCTTGGCTGCCAGGCGGCGCCAGGTCTTGATATGCTTGAGCCTC	100	69	0R
chr1R	25.2137	100032036|F|0--14:G>T	TGCAGCAGTATTTTGCCCCTGTGGATGTTGAGCAGATTGTTAAAATTCGAACCTGCACACGCCTAGGAG	100	69	0R
chr1R	25.4063	100067961|F|0--19:G>C	TGCAGACGCTGCTCATCCTGCTCCTCAGCCGCGTGCTCGCCCTGCTCCTCCGCCCGCTCCGCCAGCCCA	100	69	1R	41.17
chr1R	26.1005	100040167|F|0--60:T>G	TGCAGCTCAAAGAAGCCATGGTGGATGCCGGCGATCTTGAACGCCTCCGCCGCGTTAACCTTGCTACCA	100	69	0R
chr1R	29.3734	3739539|F|0--15:C>T	TGCAGATCCATTCGACACCGACAGTGCATAACGTGATGAAAATAAGTCTTTCACGTGAGCCAGCAGTGC	100	69	0R
chr1R	30.4814	100024125|F|0--32:T>G	TGCAGCGGCTTCACCCCGACACCGACCTTCACTGACATCATGGTGAACAAGTACAAGCTCCGAGCTGAC	100	69	0R
chr1R	30.4816	100068910|F|0--32:G>A	TGCAGCATGCGCGTCATGAAACGGAAGGTGCCGTCGTCGATGTATGGGGATAGACGCGCGCTCTCGATG	100	69	0R
chr1R	31.1972	3355150|F|0--64:C>T	TGCAGTGGCGATGGTCGGGCCGACCCAAGACAGCTCCATGACTGCTACAACACCAACTCTGTACCCGTT	100	69	0R
chr1R	31.1979	3745760|F|0--30:G>A	TGCAGCGAGGTGCGGTTGAGGCCGTCGCTCGCAGGTACGGTCAGCGCGGACATAAGGGTTGCACGGAGG	100	69	0R
chr1R	31.4704	100019932|F|0--62:T>C	TGCAGCTTGAAAGCAATAAATTTTGAACTGGCAATCAGTTGGTTTGTTAGAAAAAATCCAAATGATAGT	98.551	69	1R	51.32
chr1R	33.1227	3744837|F|0--53:C>G	TGCAGCAGCCGGCCCCTCGGCGGCAGCGGCCTCTTGGCGGCGAGCATGTCGAGCACGGCGTCGGCGCCG	98.551	69	0R
chr1R	33.9538	100078320|F|0--60:T>C	TGCAGCGGGGCTTCCCGGCGGACGGGAAGCCGACGCAATCGCGGTTCGCCCCGGTGAGGATGCCCGAGA	100	66	0R
chr1R	34.5534	100028907|F|0--11:C>G	TGCAGAGGCTTCAAACACTTTCAGTTTTCGTCCGATTCATATTTCAAGATCTTCTTCCCCAGCCTCGGT	100	69	0R
chr1R	34.6498	100082920|F|0--21:T>G	TGCAGACGTAACTGGATCTAATAGGAGACCGCGCGCGCGTGGGGAGAAGATGAAGGGGACGACGATGGC	100	69	0R
chr1R	34.8142	100050540|F|0--53:T>C	TGCAGGTCAAAGACATTAGCGTTCCACCACTCTCCGAACATGACGATCTCTTCTTTGTCTGGCTTGGCA	100	69	0R
chr1R	34.8142	100050540|F|0--8:A>G	TGCAGGTCAAAGACATTAGCGTTCCACCACTCTCCGAACATGACGATCTCTTCTTTGTCTGGCTTGGCA	100	69	0R
chr1R	34.8142	5034808|F|0--67:A>G	TGCAGCAGATGGCGCTCCTCACCGGACTCCCTGCGGGGCCAGCTGATGCCTACACCATCAACGGCAAAC	100	69	0R
chr1R	34.9213	100071670|F|0--62:T>C	TGCAGCTTTCAGCCTCCCGCAACAAGATCCAGGTAACTGCATAGTCTTTTTTCCGAGAGATGTTTGTGA	98.551	69	0R
chr1R	34.9213	100149325|F|0--6:T>C	TGCAGCTTTCAGCCTCCCGCAACAAGATCCAGGTAACTGCATAGTCTTTTTTCCGAGAGATGTTTGTGA	98.551	69	0R
chr1R	34.9213	3589407|F|0--62:C>T	TGCAGCTTTCAGCCTCCCGCAACAAGATCCAGGTAACTGCATAGTCTTTTTTCCGAGAGATGCTTGTGA	100	69	0R
chr1R	34.9388	3586981|F|0--56:G>C	TGCAGGTAGGAGGAGCCGATGTTGTCGACGCTCTGGTACAGGCGGCCGATGCTCCCGTGCATGGTGCCG	100	69	0R
chr1R	35.0308	3907785|F|0--12:T>C	TGCAGCATTAGCTACTATTGATCTTTGTCCTCCTCTTCCTGCCGGGTGCAATGGCAGCTTCCATCGCCA	100	69	0R
chr1R	35.1696	100033505|F|0--13:G>C	TGCAGTTCCACGGGTTCCACGGCGTGAAGCAGGAGGAGAAGAAGCTGGGCCAGAAGTTCACCGTCGACG	98.551	69	0R
chr1R	35.1699	3595360|F|0--38:C>G	TGCAGGATAGCCAAGGGCGTGGTGGAAGGCCCGTCGCGCAACCTCTTGGAGTCGGTGGCTCAGGCGATC	100	69	0R
chr1R	35.1699	3908758|F|0--12:A>G	TGCAGAGGAGTGACATATATACTTTGGCATCAGGAAGCTGAAGCTGACGAGACCGAGCAGGATGGAGGT	100	69	0R
chr1R	35.3061	5207774|F|0--59:C>T	TGCAGATATAACCTAGTTTATGCCTGCGACAGGATCTCTGAACAGTCGTACTAGTATATCTTATCTTGT	100	69	1R	56.56
chr1R	37.2212	100009509|F|0--35:G>T	TGCAGCGCCTTGCGCATCGCCATGTTCTCCATCTCGGTCACCTCGAACACATCCTTCAGCTCTGGCAGC	100	69	1R	62.91
chr1R	37.2212	3362687|F|0--35:T>G	TGCAGCGCCTTGCGCATCGCCATGTTCTCCATCTCTGTCACCTCGAACACATCCTTCAGCTCTGGCAGC	98.551	69	0R
chr1R	38.4025	100035289|F|0--55:C>T	TGCAGTGTGTAACTATATGTTTTTATTTTTGCCAAAAGTGTGTAACTATATGTAACGGTGCATGCATGT	98.551	69	0R
chr1R	38.5165	3910090|F|0--26:C>A	TGCAGCTCCAGGAGCTCCGCGTCCATCGCTCCCCCCGCGCCTTCGCTGCCGGCGAGATCCGCTGCTGTG	100	69	0R
chr1R	38.604	3352646|F|0--31:G>A	TGCAGTAGTTTATGTTTGGCTACTCCAAAGTGGTTTGTGTTTGGCTATTCCGTTTGGATGTGCAGATAG	100	69	0R
chr1R	38.6049	100003879|F|0--17:A>G	TGCAGCAGCTGCTGGTGAGACCGCTTGCAGTGGGCAATGGCGCCCTGGATGGCCCCCTCCTCCGACCCG	100	69	0R
chr1R	38.6049	100003879|F|0--20:C>T	TGCAGCAGCTGCTGGTGAGACCGCTTGCAGTGGGCAATGGCGCCCTGGATGGCCCCCTCCTCCGACCCG	100	69	0R
chr1R	38.6057	100071155|F|0--15:C>T	TGCAGATTCCGTTTCCAGTGTAGAGGTGTGGCAATGGCGAGGGCCCCGACCATGGTGATCCAGGACGAC	100	69	0R
chr1R	39.0426	100002440|F|0--18:C>G	TGCAGATAAACATTTTCACCTAACAAGACACCCAACATTGCAGAAAGAGCAAGTTATATACAACCACCG	100	69	1R	65.89
chr1R	39.0426	100002440|F|0--28:C>G	TGCAGATAAACATTTTCACCTAACAAGACACCCAACATTGCAGAAAGAGCAAGTTATATACAACCACCG	100	69	1R	65.89
chr1R	40.2691	100045367|F|0--34:T>C	TGCAGATTGATGTCAATCGATTAAGACTTTTTGGTTAGATATTTCCAAGAGCAAAGGATCAGAAGGTAG	100	69	0R
chr1R	40.6235	100008080|F|0--42:A>T	TGCAGGAACCAAATTGCAGTACCAAACTCTCACCCGGATTCGAGATCATTGCATGAGAACCTCGCTCCG	98.551	69	0R
chr1R	41.0499	100031981|F|0--32:T>C	TGCAGTAATTTATCCCACATAACATCAACGCGTCGCTGCATTTATACCACCTGAGGGGCGACATCTTTT	100	69	1R	67
chr1R	41.0499	100081392|F|0--32:C>T	TGCAGTAATTTATCCCACATAACATCAACGCGCCGCTGCATTTATACCACCTGAGGGGCGACATCTTTT	98.551	69	0R
chr1R	41.5927	100019015|F|0--49:T>A	TGCAGGTATCACCTTGTCCTTCAAAATACCCCAATTACGCTGATAAAACTTTGCCGGAAAACCATCAGT	100	69	0R
chr1R	42.5431	3745976|F|0--57:G>T	TGCAGGGAAGCAAAGTGGCACGTTAGTACGTTACATTACATACGGCAGTTATCCAGCGAAGAACAAGGA	100	69	0R
chr1R	42.8566	100024281|F|0--32:T>C	TGCAGGTTGGGTAGCAAGGGAGGAGTTGGGATTTGATCTCACCGAGCCAATGTGCAATGTCTACTGAGT	100	67	0R
chr1R	43.1582	100147924|F|0--14:T>C	TGCAGAGTTTGCTATTGTGTTGTCTTTGTTGCAGGATTTTTAGCAAAGCGACGCTGCTGATGATAGGTA	100	69	0R
chr1R	43.1622	100042863|F|0--43:G>C	TGCAGAAGGAGTTCATCCATTTCTCTATATAGCTTGTTAATCTGACCTTGCTGCTCATGGGATATAGGC	100	69	0R
chr1R	43.1622	3596636|F|0--43:C>G	TGCAGAAGGAGTTCATCCATTTCTCTATATAGCTTGTTAATCTCACCTTGCTGCTCATGGGATATAGGC	98.551	69	0R
chr1R	43.3963	5037567|F|0--68:G>C	TGCAGCATGTGGAGTGGCCTGTCGTGTCCCTCTCGCTTTTTCTTTCTATCTCTCGCGAGACCCGAGTAG	100	68	0R
chr1R	43.4617	100030148|F|0--36:G>T	TGCAGCCTGCTGCCGACATTGGGGACCTTGCACCTCGGTCTGTCTATACCATGTGGTCGTACTCGTACC	100	69	0R
chr1R	43.6133	100033551|F|0--54:C>T	TGCAGTATCATCTTATCACAGACTAGTCCATGCAGGACGTAGGATGGCTGTGTGCCTGCGTTGATCTCT	98.551	69	1R	76.75
chr1R	43.6133	3362880|F|0--54:T>C	TGCAGTATCATCTTATCACAGACTAGTCCATGCAGGACGTAGGATGGCTGTGTGTCTGCGTTGATCTCT	100	69	0R
chr1R	43.8274	100004850|F|0--10:G>T	TGCAGATCGTGGTGATGAACATGCTCATGGGCGCCTCCACCGTCAGCAGCATCCTCTCCACCTACCTCT	100	69	0R
chr1R	43.8741	100018886|F|0--44:G>T	TGCAGTTCAGATGTTCTCTTTCGTCCGTACACAGATGTGCTAGCGAGATATCATGCTCGATTATTGATC	100	69	1R	79.03
chr1R	45.5645	3584357|F|0--46:C>G	TGCAGGAGAGGGTAACACGGTGGTACATGATATCCCTGGCCTCGCGCGCGTCTAAGGGGGTCGGCTCCG	98.551	69	0R
chr1R	46.8979	3344544|F|0--45:G>A	TGCAGCAGATGAGCCTTTGGTAGTACAAAGGAAAGCGCACACACCGTTACAATGAGCCTTTTCCCTTGC	100	69	0R
chr1R	47.1719	3744486|F|0--24:G>T	TGCAGATCCCCTGGGTCTCCACCCGCACCACGCCCTTCCTGAAGGTGAAGAGCTCCGGCCGGACCAGCG	100	69	0R
chr1R	47.1719	3744486|F|0--7:C>G	TGCAGATCCCCTGGGTCTCCACCCGCACCACGCCCTTCCTGAAGGTGAAGAGCTCCGGCCGGACCAGCG	100	69	0R
chr1R	47.3236	3907778|F|0--20:A>G	TGCAGGTCGGCGACGCCAAGAAGGAGGACCCGAAGAAGCCGGCGGCCGCCGTGGTCGAATACTACCCGC	98.551	69	0R
chr1R	47.3236	100096770|F|0--64:T>C	TGCAGCAGCTGCGCGTGGCCGACCTTCCTGCGCAGCGCGCTGGTGAGCTTGACGGAGTCGACGCTGTCG	98.551	69	0R
chr1R	49.0382	3587880|F|0--44:A>G	TGCAGCAGGTGCTGGTGGTAGTGCCGCGGCGGCGGCGGAGGCGGAGGCGAGGGAGTGGCCTCCTCCTCG	98.551	69	0R
chr1R	49.2465	100057985|F|0--35:C>T	TGCAGTACAACGTTGGCCAGCCGCAACGCCGCTGGCAGTACAACCCCCATTTTCTATCCTTCCCTCCAC	98.551	69	0R
chr1R	49.2932	100017350|F|0--33:A>G	TGCAGCAAAGACACTCAAGAAATGGATCTGCCTAGTTAAGAAGCATAAGCCCTTCCCAATGCACTTTCA	100	69	0R
chr1R	49.2935	100004289|F|0--31:C>G	TGCAGATGCTCGTGCATCGCGTCCTCTTTCACAGGATCATACAGCGGTTATAGCACGGACAGTTTCAGC	100	69	0R
chr1R	49.2935	100004289|F|0--45:G>T	TGCAGATGCTCGTGCATCGCGTCCTCTTTCACAGGATCATACAGCGGTTATAGCACGGACAGTTTCAGC	100	69	0R
chr1R	49.7371	100043959|F|0--53:C>G	TGCAGCCGCCAGCCGAGCGCTGGTTTCCCTTCTTCCATCGTTCGGATTCTCCACTCATCTCCGTATCCT	100	69	0R
chr1R	49.9187	100079928|F|0--29:G>C	TGCAGCAGGTCGACGAAGCACATTGAGCCGTGTTCTCCACCAATGGAGATGGCCTTGTGTGTCGCGTAC	100	69	0R
chr1R	50.4148	100013144|F|0--53:C>T	TGCAGGGACATCCGCCTCACCTTCTTCATCATGATCTTCGGCTCCGTCCACTTCCTGCTCTCCCAGATG	100	69	0R
chr1R	50.4616	100081733|F|0--24:G>T	TGCAGCCCACAGGTCATCACGGCCGCCATGACGGCGGCAACAAGCGCCTGCCTAGCCCTAGCCGCGCGT	100	69	0R
chr1R	50.6885	100073378|F|0--16:T>C	TGCAGCCCACGGGTCGTGGCCGCCATGACGGCAACAACAAGCGCCTGCCTAGCCCTAGCCGCGCGTCCT	98.551	69	0R
chr1R	50.7711	5211864|F|0--51:T>G	TGCAGATCAGTACCTATATATGATCCTGCATTGGCTTCTGTGTTGCTCTCTTCTACTCTACCCTTCTTT	98.551	69	0R
chr1R	50.8246	3596638|F|0--23:G>C	TGCAGCCCGATGAAGGCGAGAAAGAGCCCGATCCCCGCGGACGACGCGATCCGCACGGGCTTGGGGATC	100	69	0R
chr1R	50.8246	5204523|F|0--31:C>G	TGCAGAGCAACCAGGGCTTCGGGCTCGTCGGCTTCAGCACGTCCACGCTGGTCACGCTCGGCGCGTGCC	100	69	0R
chr1R	51.2048	3749016|F|0--10:T>C	TGCAGAATGGTGGCCTCAAGAAGGATGATGAGCCTTTGCTGACCGGGCTGTCGCTCAACTTCACCGAGA	100	66	0R
chr1R	51.2069	100038889|F|0--61:A>C	TGCAGCAGGTGCAAACAGGAGATCGGAGGTGGCAGTTTCTACCACGATTCTGCTTTTCTTCATTCGGAC	100	69	0R
chr1R	51.3526	5214385|F|0--9:A>C	TGCAGCTTGACAACCTTGGGCGGCTCGCGGCAGGGCATGTCGAGCTCGGCGGCCTCGGCGAGCGTGGCG	100	69	0R
chr1R	51.9263	100029641|F|0--11:A>G	TGCAGACAACCAATCGGTCTTGTTCTTCCTGCTCTGCCCCTTGTTTTAAGAGCATGGAATCAGTTTCAA	98.551	69	0R
chr1R	52.2529	100014783|F|0--49:T>C	TGCAGCCTGCGCTTTCTTCAGATCTTCCTCGAGCGATGCTACCCGAGCTTTAGACTCACTGAGTTCTAT	98.551	69	1R	88.36
chr1R	52.9014	100052297|F|0--47:G>A	TGCAGATCGGTAGTAGTGTGGTAGTAGGGTGCAGGGCGCTGGAGTACGCCGATCTTCATGTATCTTTAG	100	69	0R
chr1R	52.9661	5228023|F|0--18:C>G	TGCAGCTGCGGCGGCGGCCGCGAGGCTGGCTAGCAGGAGGAGGGAGATGGGAACGACGGACAGCCGAGA	100	66	0R
chr1R	54.4428	5204498|F|0--17:T>C	TGCAGCTGCGGCGGCGGTGGCGAGGCTGGCTAGCAGAAGGAGGGAGATGGGAACGGCGGACCGCCGAGA	100	66	0R
chr1R	55.0613	100085470|F|0--42:T>G	TGCAGCTGCCACTGACGATGTGGAGTGGGAGGCCCTGGAGGCTCTGTGCCGCGAGACGGAGAAGAAAGG	100	69	1R	88.92
chr1R	55.2777	100016901|F|0--41:G>C	TGCAGATGCATCTCCCCTCCAGCACATCATTTCCAAGTGAAGCAACCGAATAATCCAAGTGCGTCGTCA	98.551	69	0R
chr1R	55.2777	3595352|F|0--41:C>G	TGCAGATGCATCTCCCCTCCAGCACATCATTTCCAAGTGAACCAACCGAATAATCCAAGTGCGTCGTCA	100	69	0R
chr1R	56.0555	100021678|F|0--8:C>G	TGCAGGGGCCAGCTCAACAATGATGAGCTCGACCGTGGCCGCCAATACGATGTGCTCAGCTGCCGCCAT	100	69	1R	88.92
chr1R	57.2953	100047963|F|0--19:A>G	TGCAGTCCATGCAGCCGCAACCGCCGTGGTCCTCGTAATCCCGGAGCGGGCTCTCGGGCTCCTCCAGCG	100	69	0R
chr1R	57.2957	100082168|F|0--24:G>A	TGCAGGCTCTCCGTGCCTGCCGCCGTCAGCCTGCCGTCTCTCCAGGCGCTCCTCCTCACCCGCGTATCC	98.551	69	0R
chr1R	57.2957	100082168|F|0--52:T>A	TGCAGGCTCTCCGTGCCTGCCGCCGTCAGCCTGCCGTCTCTCCAGGCGCTCCTCCTCACCCGCGTATCC	98.551	69	0R
chr1R	58.0252	100039980|F|0--22:G>C	TGCAGGTCATGAAATTGACTCTGATGTTCCCATCTAGAACACGGAAGAGTGTCGATTGCGAAGAAAATG	98.551	69	0R
chr1R	58.4774	3593336|F|0--17:A>G	TGCAGCTGGCTCTTGTCATAGGAGGCCTGTTCATTTTGCTATTTCGATGCTTTTATTAACATCATTTGC	98.551	69	0R
chr1R	58.9904	100024532|F|0--45:C>T	TGCAGATATACTAACACATCACCAGATCTGCGTTTATGAAAAAAACGGACATATCACCATATTCGTATC	98.551	69	0R
chr1R	59.5922	100005829|F|0--33:A>C	TGCAGTTATGATGGGTTCTTCATCTTGGTCTACACCCCCACCAGCCTTTGGATCAGTCATGGGCTCTTC	100	69	1R	89.48
chr1R	59.5973	100020154|F|0--24:C>T	TGCAGGCTTGTTGAGCTCCTGCCCCACAGGTGGTCTCTTGCTCTCATCTGTGTAGACCAGGATCTCGCG	100	69	0R
chr1R	60.1944	3745493|F|0--57:C>T	TGCAGCCTTGGCGGGACTCACAGCGGGCGGGACATAGCCGCGCCCAGAAAATAGATACTACTAAAAAAA	100	69	0R
chr1R	60.9906	100030301|F|0--42:C>T	TGCAGCGAAGCGAACCACCTACAGTAGCCTATCATTCTTTGCCTTTTCCGAGGAGCGAGATCACGAGAG	98.551	69	1R	89.48
chr1R	60.9906	100030301|F|0--53:A>C	TGCAGCGAAGCGAACCACCTACAGTAGCCTATCATTCTTTGCCTTTTCCGAGGAGCGAGATCACGAGAG	98.551	69	1R	89.48
chr1R	61.4913	100033566|F|0--59:G>A	TGCAGCCTCGAATTGGGGTCGGTTCCGAAGGTCTCGGCGAGGAGCTGGTAGCTCTCAACGAGCTCCAGC	98.551	69	0R
chr1R	61.5082	100051685|F|0--7:G>A	TGCAGAGGTGGCCCCTCCCTCGCCTTCGCCCTCTTCAACCGCTTATGCCGAGAAGAAGCAGGCCGAGAT	100	65	0R
chr1R	61.5082	3582653|F|0--21:C>G	TGCAGGCTGCGGAGGGCGTAGCACGGGCAAGGGCGGCGAGGAAGCCGCCCAGGGAGCGCTCGTGGACCG	100	69	0R
chr1R	61.8122	100040019|F|0--56:A>G	TGCAGAGACGGCCCCGCCCTCGTCCTCTCCCTCTTCAACCGTGTCTGCCGAGAAGAAGCCGGCATGCGG	100	69	0R
chr1R	61.8919	100148166|F|0--21:A>C	TGCAGCAACGGGCGGAGGACCACTGATGCGTCCCTTCGCGAGCTGCGGCAGGAGCTCGGGATTAGCTCC	100	69	0R
chr1R	61.895	100083320|F|0--21:T>G	TGCAGAGACGGGCCCTCCCTTTCCCTCACGCTCTTCAACCGCGTATGCCGAGAAGAAGCCGGCCCGCGG	100	69	0R
chr1R	61.895	3909208|F|0--21:G>T	TGCAGAGACGGGCCCTCCCTTGCCCTCACGCTCTTCAACCGCGTATGCCGAGAAGAAGCCGGCCCGCGG	98.551	69	0R
chr1R	61.9487	100073106|F|0--47:G>A	TGCAGAGACGGCCCCTCCCTTGCCCTCACGCTCTTCAACCGCGTATGGCGAGAAGAAGCCGGCCGAGAT	100	65	0R
chr1R	62.0738	100034108|F|0--17:T>C	TGCAGCATGGAGGAGCATGTCGTCGTGGAGCCCTTGGCCAGCCAGAGCCCCGCCCCGATGACCGAGATC	98.529	68	0R
chr1R	62.3734	100038012|F|0--61:T>C	TGCAGGATGTCAATGATCCCTATGTAGAGCACCACGTCATACACCTGACGGAGCGATTTGCTACCATCT	98.551	69	0R
chr1R	62.3734	3363522|F|0--61:C>T	TGCAGGATGTCAATGATCCCTATGTAGAGCACCACGTCATACACCTGACGGAGCGATTTGCCACCATCT	100	69	0R
chr1R	62.9191	100020171|F|0--66:A>G	TGCAGGGAAATGCAATGTTGCTGTCATGTTGGACATGAGCAGCATCGGCCGCGGAACCGAGGGGCGAGT	100	66	0R
chr1R	62.9256	100129271|F|0--41:T>C	TGCAGGGGCGGCTTCAGACAAGAACGCCCCATCGCAGTCTGTGGCTGTGGCAGATTCACAGTCGGCTGA	100	69	0R
chr1R	62.9256	3597449|F|0--41:C>T	TGCAGGGGCGGCTTCAGACAAGAACGCCCCATCGCAGTCTGCGGCTGTGGCAGATTCACAGTCGGCTGA	98.551	69	0R
chr1R	63.6178	100077516|F|0--64:T>C	TGCAGCCGCTGCTCAGCTGGTTCCCGGTCAGGTACGAGTTGTGCCCCGTGTAGATGAAGTAGTGTGACA	100	69	0R
chr1R	64.0472	100046403|F|0--30:A>G	TGCAGGACGCGGGTCGCCACCGAGGTTGTCAGAGTTGGCTTGCAGTAGCTTCCTCCTTGATCTCTGCTG	100	69	0R
chr1R	66.1095	3580143|F|0--63:A>G	TGCAGCAGAAGAGACACTGAAGGCGGAGCAGGTAACCAAGGCGGCATCTCCCACCACCAACTCACGGTC	100	69	0R
chr1R	66.1095	100078396|F|0--63:G>A	TGCAGCAGAAGAGACACTGAAGGCGGAGCAGGTAACCAAGGCGGCATCTCCCACCACCAACTCGCGGTC	98.551	69	0R
chr1R	66.1168	100111550|F|0--7:A>G	TGCAGCGATGGATGAGAGGTCCAGGATGCAGCCGCCGGTGCCTTCGCGGGTGCGAGAGGGAGGGGTGCG	98.551	69	0R
chr1R	66.8993	100016705|F|0--18:C>T	TGCAGCCATAAACTACGGCGACCATGGAACCACATTCGGCGGAGGCCCTTTTGTGTGCCATGCTGCATT	98.551	69	0R
chr1R	66.901	100040398|F|0--34:C>G	TGCAGTTGTTTGAGTTCGCCAAGAACCACCGTGGCCTCTACCAGAACAGCATTCCATCGACCAGAAATT	100	69	0R
chr1R	68.1366	100007845|F|0--47:T>G	TGCAGCCCTAGCAAGGTACATGTTTCTTTTCTTTCTAACCCTCCTTTTCTATCTGGTGCCAATCTGTCC	100	69	1R	96.22
chr1R	68.2749	3344875|F|0--26:T>C	TGCAGTATTAAGTACTACTGCTGGTATAGATGTTCTGCTATAAAGAAAAGAGAAAAGCAAAAAGGGCAT	100	69	0R
chr1R	68.3333	5215614|F|0--22:G>T	TGCAGTATTAAGTACTACTGCTGGTACAGATGTTCTGCTATATAGAAAAGAGAAAAGCAAAAGGGGCAT	100	69	1R	96.22
chr1R	69.1732	3744664|F|0--14:G>A	TGCAGCTTCCTTGCGTCTTCCATGATTGCAAAGGGTTGCCACGAATGAGTTGCAACTAACATCATCTAG	100	69	0R
chr1R	70.763	100001994|F|0--31:G>A	TGCAGCGCTTGCCTGAGCATCCCAGAGCCGCGGAGCACACCTAATCTTTCGGCACATGCCACCATCGCC	100	69	0R
chr1R	70.7721	100042582|F|0--35:G>T	TGCAGTCCCTTTCTTCTTCCTCTCTGAGTACCAAAGTGATGGCGCTGATGCTGCGATCCTCGACGCCCT	100	69	0R
chr1R	72.7626	100061933|F|0--31:C>T	TGCAGATGCATGCCGTCGCGGCCATGGATGTCGTTGCCATGCAGGCTGCGGCATTAATTAGGGTTTGGG	100	69	0R
chr1R	74.7889	100075684|F|0--7:A>G	TGCAGCCAAGGGACGGCAACGCGGCGGCCTCCCTGTCCTTGGGCGGCGCCGCCCTTGCCAAATCGAAGG	98.551	69	1R	96.22
chr1R	75.0211	100082317|F|0--51:A>G	TGCAGCGTTTGTGCAGCCGACGCACTCTAAGTGCTCGATGAAATGCCCATTAGAGAGATAGGAGGAGGG	98.551	69	1R	96.22
chr1R	76.3486	5213147|F|0--61:T>C	TGCAGCGATGGCTATTTGCGAACGATGGGACCATTGTTAATCCACTCTCCCAACTTGTCATTGACGCCA	100	69	0R
chr1R	78.7681	100033274|F|0--56:T>C	TGCAGAATTACTCGCTCCAAGCCATCCTCGCCCGAGCTGGATCCTGCTCCAGCGACTGAGCCGCAATCT	100	69	4R	286.95
chr1R	79.3101	3742839|F|0--14:A>C	TGCAGGCGTTTGGCACACCTCCCTCGCGAGCTCCCCGTCCTGGATCTCAAGGTCAGCGACGCGCTCCCG	98.551	69	0R
chr1R	82.3188	3342183|F|0--14:A>G	TGCAGATCCAATCAACCGTCCGCGTACACCGTACACGATCCCATCACGCTTAGATTCGCTCCAGTACGC	100	69	0R
chr1R	82.319	100028842|F|0--23:A>T	TGCAGACAACGGGATCTAAGTGCAACCGCCTTAACCTCACATACGCAATCATTGCATGTGGGCATGCAC	98.551	69	0R
chr1R	82.3222	100085004|F|0--13:C>T	TGCAGAAAAAGAACGCCAGCCTGGCCGCTCGCCGTGGCCTGGACGCCTGGCGCGTCATGGACCACGACG	100	69	1R	96.78
chr1R	82.7683	3582424|F|0--22:T>C	TGCAGAGGAGAAGGACAAGCAGTCCGTTCCCTACAGCGACGCCCCGTCTCCAGTGCGCGCCGTGCTCAA	100	69	0R
chr1R	82.7683	3582424|F|0--51:A>G	TGCAGAGGAGAAGGACAAGCAGTCCGTTCCCTACAGCGACGCCCCGTCTCCAGTGCGCGCCGTGCTCAA	100	69	0R
chr1R	83.0113	4486918|F|0--17:T>G	TGCAGGCATGTACAAGCTGCTCTTACTAGTGCTACTGTGCTGGAGGACGTTACGGAGGTACTTTTGCTG	98.551	69	0R
chr1R	86.0069	3362842|F|0--14:T>C	TGCAGGGTCTCCTCTGCGTCCTTGTCCTCGTGCCCCTTCACGTACGTGAAGTTCACCGTCGCTCCCTCC	98.551	69	0R
chr1R	86.1818	100138310|F|0--45:A>G	TGCAGCGATCCGGCGAGAGGTTGCTGCCTACAATGTGGTGCCCTCAGGATGGCGCAAGAAGTTGTCTCC	100	69	0R
chr1R	86.5662	100025343|F|0--43:G>T	TGCAGCTAGTGGCCCATGGAAATTAATGCAGGTGCTGGGTGGTGCGTGTGATGGTGACATACCGGCGCT	100	69	0R
chr1R	86.5667	100115683|F|0--67:G>A	TGCAGAAGCCGCGCCCACTGGTCCTCGTTGTCGCTCCCGAAGCTCTTCTTCGTCTCCTCCACCGCCAGC	100	69	0R
chr1R	88.0197	100041119|F|0--23:A>G	TGCAGCCGCCCAAGGAGTCGCCCACCACGGTGGCCGCGCCTCGTCCTCCGACGCCGCAAGTGCCTGTCC	100	69	1R	103
chr1R	90.2486	100016369|F|0--40:T>C	TGCAGACTGGAACCTACCTTGAATGGTAACTTATGTGATGTCCCGTGGGATACATACATCTGATAAAAA	100	69	0R
chr1R	90.593	3906943|F|0--31:C>A	TGCAGCTCCACGCCGTTGTCGCCGTCGACGGCGAGCTGCTCATACTCGCCGATGTAGTCGAGGTGGACC	100	69	0R
chr1R	90.7021	3598931|F|0--30:G>A	TGCAGCTCCACGCCATTGTCGCCGTCGACGGCGAGCCGCTCGTACTCTCCGACGTAGTTGAGGTGGACC	98.551	69	0R
chr1R	91.1202	100021069|F|0--17:A>G	TGCAGCAGCAGCTCAGTAGCTTCCTGTATTCATAGTTCCGCGCAAATCAGAGCTCAACTTACCATAATT	100	69	1R	101.88
chr1R	91.1305	5228400|F|0--19:C>T	TGCAGAGATTCTACGACCCCGACGCGGGCCACATACTTCTGGACGGGGTGGACATCCAGAAGTTCCAGG	100	69	0R
chr1R	92.7512	100039315|F|0--15:G>A	TGCAGATGCGCAAAGGAACTGATGGACTGAATGGTTCTTCTGTCGAGGTTAGATTAGCTGATCGGATAG	100	69	1R	103
chr1R	92.7555	100068611|F|0--6:G>T	TGCAGCGGCGGCCGCCGCAGCCAGCTCAATGCCATTGTCAACGCCATCGTCGACCCCATTGTCAACTCC	100	69	0R
chr1R	94.6457	3745235|F|0--51:G>C	TGCAGAGTCCAATCGAGCCATAATGCTGCACATGCGCGCATGTTCCTGGCCGAAGCCCGGTGTGTAAAG	98.551	69	0R
chr1R	94.6482	100015955|F|0--20:C>A	TGCAGCTAGCCTCCGTCCACCGCTGCTGTTCTCTTCTTCTTGGGGTTCAGAAGTGGTTGCGGTTAACAT	98.551	69	0R
chr1R	95.1674	3364356|F|0--62:C>T	TGCAGAGCCCCACGAGAAGACACCTCTCCTAGCTAGGATGGAGCCTATAAATGAGGACCCAACCGAGCT	98.551	69	0R
chr1R	95.3554	3907045|F|0--17:G>A	TGCAGAAGCCATTAATGGTGTTTATCTGAGAACTTTGTATCGTCACTTAGTGTAGAAATTGAAGGAGTG	100	69	0R
chr1R	95.7699	100076761|F|0--57:C>G	TGCAGGTGCCGCCGTCGCCGCCTTCTTCTTGGCTGCGGGCACCGTCTTCTTCTTCTTCTCGGCAACATC	100	69	1R	105.27
chr1R	96.1123	100062283|F|0--64:T>G	TGCAGCAGCGGCAGCCGCCGCAGCTTCCTCCGCCACCAGCCGATCATGCACCTTCTTGATATACTCGGC	100	66	0R
chr1R	97.6546	3902064|F|0--64:G>A	TGCAGGTGCTGCGCATGGTCGGCTTCGCGCGCGAGTTCGGCAGGTTCGCCGACGTCGCCGTCGTGCTGG	100	69	0R
chr1R	98.2169	100025451|F|0--22:T>C	TGCAGTGCTGCTTCTGCTTTATTCATTCACAAGTAATAGTAGTCCTACCAATAAAAGATCTATTTGTAG	100	69	0R
chr1R	101.357	3597056|F|0--19:A>G	TGCAGCGGCAACGGAAGATACCCGAGGAAGAAAAACCAACTCGCACGCAATCGAGCTAGGGTTGTTTGG	98.551	69	0R
chr1R	101.67	100018414|F|0--31:T>C	TGCAGAAGCTCGGGCTGCACAGCCACGACCATACCGTCCACTCCCTCATCACCATGTACTCCAACCTCG	100	69	1R	107.5
chr1R	102.031	100042701|F|0--15:C>G	TGCAGCACAGGACAACTTGTTTGCCACTACTTTACCTGTAAATTCTAGAAATATTGTGCACGTAGGGCG	98.551	69	1R	107.5
chr1R	102.031	3363913|F|0--15:G>C	TGCAGCACAGGACAAGTTGTTTGCCACTACTTTACCTGTAAATTCTAGAAATATTGTGCACGTAGGGCG	100	69	0R
chr1R	102.59	100030777|F|0--33:G>A	TGCAGAACACCACTGTCCGCCTGCTTCAAAACTGCCGACTGTTTCTGCCGCTGACGCCGTGACATCACC	98.551	69	0R
chr1R	102.8	100163406|F|0--19:G>A	TGCAGACAAGCTGTTGACAGCGTCCATGTGCACGGCTGTCAAGTTTGAATTCGATATAATCTCGCGCGT	100	69	0R
chr1R	103.351	100046054|F|0--25:A>T	TGCAGCTAGACTTGAGAATGTTGCGAATGCTGCTGGCTCTTTCTCCCACTCCCAGTTCACATGGGAAAT	98.551	69	0R
chr1R	104.168	100019510|F|0--46:T>C	TGCAGCCACCAGGCGCCGCCGCGCAGCCGTCGGAAAGCCCTATTCCTTGCCCTCATCCTCCCATTCCCG	98.551	69	0R
chr1R	104.446	100019954|F|0--11:T>A	TGCAGCTAGACTTGAGAATGTTGCGTATGCTGCTGGCTCTTTCTCCCCCTCCTAGTTCACATTGGAAAT	100	69	0R
chr1R	105.94	100156520|F|0--10:G>A	TGCAGAGCGCGAAGCACCATCGCCTAGAACCTTACATCCAGCACGCCAGAAGCGAACAGAATAGGTAGA	100	69	0R
chr1R	107.072	100021831|F|0--40:T>G	TGCAGTACATGGAGACAAACCCGCTGCTGACGTGGAAATCTCCGTCGCCGCACATCCCACGCTTAACGG	98.551	69	0R
chr1R	107.118	100065437|F|0--45:C>T	TGCAGACGACGCCTTCCCTCTCGTCCACCCTTCTCCGATGAGCGACGGTGCCACGCTCCTCCGCAGCCA	100	69	0R
chr1R	107.957	100054546|F|0--10:G>T	TGCAGCGATCGCTGCACCTCGCCGCTGCTCGCCATGGCGTCCGCCGACCTACCACTGCTTGTTCAGAGA	100	69	1R	107.5
chr1R	108.311	100038612|F|0--27:A>G	TGCAGCCTTTCAAAGATCGGCCCTCCCAGGGTATCGTGGGAACGGGATGACATCTCTGATGTTCTCCAG	100	69	0R
chr1R	109.08	100002328|F|0--33:C>T	TGCAGGCATATCGTGCTGCTGATGGTGCTGCATCAGGCATCCCGCCAGATACCTTAGCTTGCCGTCCGA	98.529	68	0R
chr1R	109.08	100043602|F|0--41:T>C	TGCAGCCATGGATATCCAGCTACCAGCACCAGTTTGGGGCTTCACGCCGAGTTCATATGGCTCTTCTGC	100	69	0R
chr1R	109.131	100004181|F|0--13:T>C	TGCAGAGCAAGTTTAGGAAAGTCGCCAAGAAGAGCAAGCAAGAGTTCGACGCCATTGATGGAAGGATCC	98.551	69	0R
chr1R	109.131	3742728|F|0--14:G>A	TGCAGGAATGATGAGACCTTCTAAATGGGAAGTAAGCAGGCAGAGGAGATCAAGAATCTCCTTCTCAAG	100	69	0R
chr1R	109.28	100025220|F|0--43:T>C	TGCAGTTGACGCATCAATCGCGAGGTTACTCTCATGCAGCACCTCACTCTCAGGGTCCACAGGAGCAAC	100	69	0R
chr1R	109.692	100064628|F|0--31:G>A	TGCAGAACGCTGCCGTGCAGCAGCGGGACGCGGCGGAGACGGCCGCACGGACCTTGCCTGGGATCGAGA	100	69	0R
chr1R	110.904	100015254|F|0--46:G>C	TGCAGTCCACGAGAACATCGCTCGTGGGGAAATCCAGCTCGATGAAGGGCTTCGCCTGCTCCTCCTCCG	100	69	0R
chr1R	112.449	100033460|F|0--11:G>T	TGCAGTCCTGAGAGGATTCATTGGTACTTTTATGAGGATTCACTGGTACTAGAGCAGGGCAGGCAATGA	100	69	1R	106.39
chr1R	112.449	100006471|F|0--56:T>G	TGCAGTTTATTGCTTCCACTAGTTTTACTCATTGATGTATGGTTGCCTCTGCGAACTAACGCCAGCATT	100	69	1R	106.39
chr1R	115.568	100030396|F|0--31:A>G	TGCAGTCCCAGTTCTCGATTGGAAGGGGTTCAAAGATGGCTGTTCGCCTTGGGCTCAACAACAAGCTGA	98.551	69	0R
chr1R	117.469	100008864|F|0--62:C>A	TGCAGATACCTGTACTTTTATTTTCAGTTCTCCTAGAGCCTCCTTCTGCACTTGGGGAACAGCTGCATC	100	69	0R
chr1R	118.259	100062911|F|0--26:A>C	TGCAGTTCATCCCCTAGGGCAAGCAAATATCGGGCGTATGTTACGGTACAGGTACAGGTATCACTTATC	100	69	1R	107.5
chr1R	118.259	3364326|F|0--26:C>A	TGCAGTTCATCCCCTAGGGCAAGCAACTATCGGGCGTATGTTACGGTACAGGTACAGGTATCACTTATC	98.551	69	0R
chr1R	118.667	3597643|F|0--19:T>C	TGCAGCTGCCGCATGTCGCTGACAGATGCTGCTGGTGCCGGCTTCAGCTCCGTCCTCCCGTCGATCATC	100	69	0R
chr1R	120.8	3595583|F|0--68:A>G	TGCAGCGCCGTGGCCAGCAGCTTGTTGGGGTACTCCTTGAGGAGGCGCACCTGGAGGACGATCCATAGA	98.551	69	0R
chr1R	120.8	5221827|F|0--65:A>G	TGCAGCGCCGTGGCCAGCAGCTTGTTGGGGTACTCCTTGAGGAGGCGCACCTGGAGGACGATCCAAAGG	98.529	68	0R
chr1R	120.8	100060079|F|0--65:G>T	TGCAGCGCCGTGGCCAGCAGCTTGTTGGGGTACTCCTTGAGGAGGCGCACCTGGAGGACGATCCAGAGA	100	69	0R
chr1R	120.8	100012985|F|0--54:G>A	TGCAGGATGCATGGCTGCTGTAACTCTGTAGTAGTATTTCCCAGCTACACCTGTGAATCCAGCTTGGTT	98.551	69	1R	107.5
chr1R	121.222	3906827|F|0--58:G>A	TGCAGGCCGTCGACCGCTCTCTCCAGTCCTCCCACCAGAGTACGAGCCCTCTCTCGCCGTCCTCCCTTC	98.551	69	0R
chr1R	121.656	100124421|F|0--41:C>A	TGCAGCAGCCGGCAAAGTAGCCGGCATACCGTTCTACCCACCCGATGTCAGCAAAGTGTTCGGCGTGCC	100	69	0R
chr1R	121.656	4091925|F|0--45:T>C	TGCAGCAGCCGGCAAAGTAGCCGGCATACCGTTCTACCCACACGATGTCAGCAAAGTGTTCGGCGTGCC	98.551	69	0R
chr1R	123.861	100044852|F|0--11:C>A	TGCAGTTTCGTCAGTTTTGTTTGTGATTTTGTTGCAGGATACTCAGGGCGAAGGTGCAGGAATTCGGCA	100	69	1R	107.5
chr1R	124.47	3586479|F|0--59:C>G	TGCAGCCGGCTCATCCCCAGCAGCCCCCTCTCCGCCTCGGCTTACACGGCCGCGCCGTCCCTCGTCCGC	100	69	0R
chr1R	124.47	3742301|F|0--13:G>C	TGCAGGCCGGGGAGGTGGCCACGGACGCCGCCATCGCTGCCGCTGCTGTAGCCCCACAGCCAAGCTGCG	100	69	0R
chr1R	127.327	3743915|F|0--22:T>C	TGCAGCGCCGCCACCGCCACGATGACGGCGAGGAGCGGGCCGGCCTACTCCGCCGTGTCCCCTAAGTCG	100	69	0R
chr1R	127.345	100014913|F|0--8:G>T	TGCAGAGGGCAGTCAGGAGGATTACCGGAACGCCGACCTGGGGCGGAGCGCTGGACGCGGCGGCGGCCC	98.551	69	0R
chr1R	127.73	100013587|F|0--44:G>C	TGCAGGCCAAGGCTGTCCACCATCTACTTTGCAGCCCCACCACTGCATGCACGAATCTCGGCGCTCCCA	100	69	0R
chr1R	127.862	100014033|F|0--31:C>T	TGCAGACCCAAACTGATTCAACATTGTGAAACCAGATCTTCTTCGTCAGGAAAGCGACGGCCGATGGAA	100	69	1R	106.39
chr1R	127.862	100014033|F|0--66:G>A	TGCAGACCCAAACTGATTCAACATTGTGAAACCAGATCTTCTTCGTCAGGAAAGCGACGGCCGATGGAA	100	69	1R	106.39
chr1R	128.643	3905031|F|0--16:C>G	TGCAGGCGCAGGCTGACCACCTTCGCGCCGCCGTTGGGCCCGCCCGCCGCCATGGCCATCGACGGTCCC	100	69	0R
chr1R	128.643	3365345|F|0--64:C>G	TGCAGTACTACTGCGTGTTCGCGGCGGTGGGCGTGGCGGTCATCGTGCTCTCGCTCACCTTCCTCTCCC	100	69	0R
chr1R	128.646	100012932|F|0--61:A>G	TGCAGATTCTGCATAAGAACGGGGCGAGGAAGTTCTGGATACACGGGACAGGCGCGCTGGGATGCCTGC	100	69	1R	106.39
chr1R	129.113	3584389|F|0--24:G>C	TGCAGGTCGGGCTTTGTGATGTAAGTTGTGAAATCACGGTGCTTATAACTGTTGGAATACAGAGATGCT	100	69	0R
chr1R	129.462	3733720|F|0--6:T>C	TGCAGGTGCCCGTTGAAGCCCAATTAGAGTGCTAGCACTATTTTCTTTTTCCCGATTTTCAACTCGGGA	100	69	0R
chr1R	129.462	100078122|F|0--35:A>G	TGCAGCGCTATACAGGAGGGGAGCTCCTATAGGCCACTCGCTGCGGCAAAATGCCGGCGCTTCGCACAA	100	69	0R
chr1R	130.483	100027445|F|0--58:G>T	TGCAGCGATCCTGATAGTAGACCATGTAAACAGGTTCTGAAAACGAGAAATCAGATGCGCGTTGAAGTT	98.551	69	1R	107.5
chr1R	130.483	3364130|F|0--58:T>G	TGCAGCGATCCTGATAGTAGACCATGTAAACAGGTTCTGAAAACGAGAAATCAGATGCTCGTTGAAGTT	100	69	0R
chr1R	130.498	100006178|F|0--23:A>G	TGCAGTTGCCTTCAGGTTTCAGGACTTGCTTGTCGTCAACCTTCCATCACAACTTCCCACGGAAGCAGG	100	69	0R
chr1R	130.791	100002478|F|0--50:C>T	TGCAGCACAAACAGCATTGTTGTTGAAAGTAGTTCTTGGATGATGGTAAACATACCTTTTCACGATAAG	98.551	69	1R	107.5
chr1R	131.459	100004472|F|0--43:T>A	TGCAGCCACCCTCTCTCTGTGTATAAGCCATTAACAAAGAAACTGGACATACCCTAATCAGTCAGCCGC	98.551	69	1R	107.5
chr1R	132.257	3349900|F|0--20:T>C	TGCAGAACTGCTTTGTATACTTTCCCAAACCCCCCAACTCCGACAACCATCTGCTCGTCAAAGTGTTTT	100	69	0R
chr1R	132.817	100019251|F|0--17:G>A	TGCAGCATATTCTGATTGTTATGCTTCTACCTGTAATATCTTTTCAAGTCAGGTTTGAAATATAATCAC	100	69	1R	106.39
chr1R	132.817	100005576|F|0--14:C>T	TGCAGGTATCAAAACAATATTACATTGTTGATTACGCAAGATGAGGATCTCATATCTGGCCAAAATACT	100	69	1R	107.5
chr1R	133.01	100057448|F|0--62:T>C	TGCAGTGAAGTGCGATGAACTGGGGTGGCTAGGAGCCTAGGAGCGCTCGCGTATATGTAGTGTTCCGTC	100	69	0R
chr1R	134.068	100038122|F|0--13:C>G	TGCAGGAATCTCTCTTAAATCTGTTTGTGTGCATTCTATGCTGGATGTATTGCATACGATCAGTGCTAT	98.551	69	0R
chr1R	134.068	3363339|F|0--13:G>C	TGCAGGAATCTCTGTTAAATCTGTTTGTGTGCATTCTATGCTGGATGTATTGCATACGATCAGTGCTAT	100	69	0R
chr1R	135.167	5227155|F|0--43:T>C	TGCAGTAAATTCCACAGAGCACAATTGTTAGGAACAGTGCACATGTGCAGCAGTTTGCAATAGAGTTTG	98.551	69	0R
chr1R	136.413	100027072|F|0--50:G>A	TGCAGCATTAGGCACCAAGGTAACTAAGACTGAAACCAGACATTATACATGACAAAGTGCTGAATTGCA	100	69	1R	106.39
chr1R	136.413	100027072|F|0--60:T>A	TGCAGCATTAGGCACCAAGGTAACTAAGACTGAAACCAGACATTATACATGACAAAGTGCTGAATTGCA	100	69	1R	106.39
chr1R	136.413	3743046|F|0--66:G>A	TGCAGCATTAGGCACCAAGGTAACTAAGACTGAAACCAGACATTATACATGACAAAGTGCTGAATTGCA	100	69	1R	106.39
chr1R	139.464	100025755|F|0--41:G>T	TGCAGTGCTATATATAGATGGTATTGGGAGATATCCCCTCGGAGGGTTTATATGGAAGAAGATACGAGA	100	69	0R
chr1R	140.61	100090304|F|0--40:A>G	TGCAGCTGGGCCCGTCGGGCACGCTGGTGGGCTACTGGCCATCCTCCCTCTTCACCCACCTGGGCGCGC	98.551	69	1R	106.39
chr1R	140.894	100016723|F|0--62:T>G	TGCAGCTCACCAGCCTGAACCGCCTCAACCTGTCGGACAATCTCCTCTCAGGCGCGATACCCTCTGTGC	98.551	69	1R	107.5
chr1R	140.894	100001552|F|0--53:C>G	TGCAGCAGTGAAGTTGGTATCTGGCCATGGAGCTGGTTGTAGGACAGGTTCAGCCGCTCCAGCTTCACG	100	69	1R	107.5
chr1R	141.372	3350465|F|0--30:C>G	TGCAGTTTGTCTTGCAGCCACCGTGAAGAGCCAGGCAGGCTGTGATGCGTGGTTGCATGCATCGCATGA	100	69	0R
chr1R	141.387	100043922|F|0--41:C>G	TGCAGTCGAGTAACTATTCGATACGTATCCTTTTCCTTGTTCGCAAAATCGCAACCCAATAAGTGCAGT	100	69	0R
chr1R	145.493	3359777|F|0--12:T>C	TGCAGCTGGCAGTGTTCAGCTACCATAGATAAATAACAACCACAGCTAGGACAAGTGAATAATATACGG	100	69	0R
chr1R	145.988	100012633|F|0--40:C>G	TGCAGCATGTTCACTGAGATCTTTTCATCAAGTCCATCAGCCGTAAGCTCATGCATGATATTACTGTGA	100	69	1R	106.39
chr1R	147.988	100069639|F|0--67:T>C	TGCAGCTGCCGGCCATGTCGGTGGAGACGGAGCGGAGCTCCACGGAGTCCTCCGCCGCCTCGGGCCTTG	100	67	0R
chr1R	147.988	3590180|F|0--67:C>T	TGCAGCTGCCGGCCATGTCGGTGGAGACGGAGCGGAGCTCCACGGAGTCCTCCGCCGCCTCGGGCCTCG	100	69	0R
chr1R	151.327	100027351|F|0--67:G>A	TGCAGTCCATACTCTATTCGTGATTCGTCTATGGCAGCCAGCTGGAATGCAAGGACATGATAAATTGGC	100	69	0R
chr1R	153.433	100003182|F|0--66:G>A	TGCAGAGTAGTTCCGTTTTTCAAATAGCTTACCACTCATGCCAAGTGGTGAAACCAGGCTGATCTCGGC	98.551	69	0R
chr1R	154.17	100013803|F|0--67:T>C	TGCAGCCTGCACCTCGATCACGCCTGCCACGCCCTGCAATTCCTCTCACCCGACATACATGTGCCAGTC	100	69	0R
chr1R	155.056	3905962|F|0--68:A>G	TGCAGGTCAGTGAAATACACCGGGATACCAATGCAGCAATCAACAACAGCAGACTTGAGGTTATCCTCA	100	68	0R
chr1R	156.26	100025379|F|0--54:T>C	TGCAGATACCAACACACATAATTTTAAACAAGATGCAAAAAAGAATACTTCCTTTAAAGTTAGTATAAA	98.551	69	0R
chr1R	161.233	100014395|F|0--12:C>T	TGCAGAACGTCCCATAAAATCCGTACTTTAAATTTTGAGTTCCTTTCACAGGGTTGAAAAAGAAAAGGA	98.551	69	0R
chr1R	163.629	5045585|F|0--63:A>G	TGCAGCTGCGGCGGCGAGTGACGGGCGCAAAGACGACCGACAGTTTACCGCGAGGGCGGCTTGATCGCA	100	69	0R
chr1R	169.126	100043339|F|0--13:G>A	TGCAGCTGCCGCCGTCACGATCTCCTTGCCCGTGTTCGACATGATCCTTCGATTGCTTTCCGAAAATCA	98.551	69	0R
chr1R	190.576	100022572|F|0--33:G>C	TGCAGTTGCCTCGCGCCCCATCATGACGCACGCGCACGCCCGTGCTCGAACGCAAGGAGCGGCGGTCTC	100	69	0R
chr1R	222.031	100050769|F|0--23:C>G	TGCAGGGTCTCCTCGCACTGCACCGCGCGCGCTCGCCGAGCGCTGCCACCAGAAGATTCCAACCGAGAT	100	65	0R
chr1R	263.988	100027181|F|0--23:A>G	TGCAGGTGGATGTGCACGTTGCTAACACGAGCAAGAATAATTTACTGTCCCCCAATTTCTCATCTATTC	98.551	69	0R
chr1R	266.531	100008425|F|0--11:C>A	TGCAGTTTGAGCAAAACAAAGGCGTGGCTCAACTTGAACCCCATCAGAGGCGAGGCCTTCTTCTACGTC	98.551	69	0R
chr1R	266.531	3346302|F|0--10:G>C	TGCAGTTTGAGCAAAACAAAGGCGTGGCTCAACTTGAACCCCATCAGAGGCGAGGCCTTCTTCTACGTC	98.551	69	0R
chr1R	283.952	100043246|F|0--14:G>A	TGCAGTCAGATCGGGTTGTGAAAATTTCGGCAGCAATGGATGTATCTACCGTCTGGCAACTCGTTGCAT	98.551	69	0R
chr1R	283.952	100043246|F|0--8:G>A	TGCAGTCAGATCGGGTTGTGAAAATTTCGGCAGCAATGGATGTATCTACCGTCTGGCAACTCGTTGCAT	98.551	69	0R
chr1R	285.378	3590233|F|0--31:C>T	TGCAGGGAGCGGCGCGACCACGGAGCGCGGGCGGGCACGGCCAGAGGCTGTGTAGCACGGGCGGGCATG	100	69	0R
chr1R	285.398	100032394|F|0--56:C>A	TGCAGCACGTGGGCCGACAAGGCACGGCTATTAAAATCGTGTCCTGGTGGGCCATGCTGTGCCAGACGC	98.551	69	0R
chr1R	287.646	100037288|F|0--29:G>A	TGCAGTTGCAGGGCTGTATCTCGTCACGTGGCGGTCATGCATGCCCCATGACTAGAAAGCCGACGTACA	100	69	0R
chr1R	289.657	100015895|F|0--63:A>G	TGCAGGATGTGGAATGCACATTTTTACACCCCAAATCGTAAAACGATGATTATTTTATAGTTCAGAGAT	100	69	0R
chr1R	290.787	100015255|F|0--48:T>A	TGCAGGTGATCAAAGTCATCTGCTTACTTTTCAACAGAAAAACGAGGCTTCGCCTGTTTCGATTCGAGG	98.551	69	0R
chr1R	290.787	3363070|F|0--48:A>T	TGCAGGTGATCAAAGTCATCTGCTTACTTTTCAACAGAAAAACGAGGCATCGCCTGTTTCGATTCGAGG	100	69	0R
chr1R	300.859	100001533|F|0--23:A>G	TGCAGAGTTCAGGGTCGCACCAAAAGACTAAACCAGCTTCTAAATTGCACAAAAGTGAGCTGACAAATG	100	69	0R
chr1R	302.235	100036611|F|0--35:C>T	TGCAGGTCAGACAACCTATGTTAGATGATGAAACCCGTGCCCAAGTGGAACAACCAGATGAGAAGATAC	98.551	69	0R
chr1R	302.235	100036611|F|0--63:A>G	TGCAGGTCAGACAACCTATGTTAGATGATGAAACCCGTGCCCAAGTGGAACAACCAGATGAGAAGATAC	98.551	69	0R
chr1R	302.235	3346648|F|0--63:G>A	TGCAGGTCAGACAACCTATGTTAGATGATGAAACCCGTGCCCAAGTGGAACAACCAGATGAGAGGATAC	100	69	0R
chr1R	303.45	100026046|F|0--39:T>C	TGCAGAAGCAGAAGCAGAAGGCAGCAAAGAATAAGTTAATAATCGCAACTCATCATACATAGTCTTAAC	98.551	69	0R
chr1R	303.45	3363479|F|0--39:C>T	TGCAGAAGCAGAAGCAGAAGGCAGCAAAGAATAAGTTAACAATCGCAACTCATCATACATAGTCTTAAC	100	69	0R
chr1R	304.3	100115678|F|0--16:G>A	TGCAGAAGCTCGGGGTGAAGAAGATCCTGGTGAACCAGCTGCACCCCGTCGGCTGCACGCCGTGGCTCA	100	69	0R
chr1R	304.3	100115678|F|0--19:G>A	TGCAGAAGCTCGGGGTGAAGAAGATCCTGGTGAACCAGCTGCACCCCGTCGGCTGCACGCCGTGGCTCA	100	69	0R
chr1R	305.448	100025711|F|0--36:A>G	TGCAGGCACGAAACCAGAAAGGGAAAAAGTCGTTCCACTCGCGCACGTAATCCTGGAATTGTTGGACCA	98.551	69	1R	106.39
chr1R	305.448	3353896|F|0--36:G>A	TGCAGGCACGAAACCAGAAAGGGAAAAAGTCGTTCCGCTCGCGCACGTAATCCTGGAATTGTTGGACCA	100	69	0R
chr1R	306.559	3743860|F|0--9:C>G	TGCAGCGAGCCTACACCGCGTAGACCATCGCCGTACAGCCGACGCCAGAGAATGGAGCCGCCGTGTGCG	100	69	0R
chr1R	306.573	100034240|F|0--19:A>T	TGCAGTGCCGCTCGCATCCAGCACACGTGTGTGCGTGCGAGCACACGCACCACCACCCAGCCCCCTCGC	98.551	69	1R	106.39
chr1R	306.852	100022667|F|0--47:G>C	TGCAGAAACATTCGCGTTTAGTCTCACAATAGGCCCAGAAGAAATACGTGCCAAAGCCCATTAGATGGA	98.551	69	0R
chr1R	308.351	100012313|F|0--33:T>A	TGCAGAGTGCTGCAATGGCCTACAGAGAAGCTTTTTTCTTTTTTCTTTCCGAGATAATGTTGGCACTTT	100	69	0R
chr1R	310.641	100057520|F|0--29:C>T	TGCAGCCATGCCTGCTCGCCAAGCCCCGCCGTTGTCGTCCCGTGAGCGCGTCGTCCAGGTCCCCTTCAT	98.551	69	0R
chr1R	311.007	100069915|F|0--40:A>C	TGCAGCGCGCGATGCCGCGACCTGCCGTCCTTCCGCTCCTACAAGAGCTCCACGCCGTCACAGCCGCCG	98.551	69	1R	107.5
chr1R	314.449	100020600|F|0--17:C>T	TGCAGACTTTTAGAAGACTAAACCTTGTTAAATTGCAAGTTTACAACAACAGTAGACCGTAGCGTAGAC	100	69	0R
chr1R	314.449	100020600|F|0--67:A>G	TGCAGACTTTTAGAAGACTAAACCTTGTTAAATTGCAAGTTTACAACAACAGTAGACCGTAGCGTAGAC	100	69	0R
chr1R	314.729	100068779|F|0--7:C>T	TGCAGTACGCGTGCAGGAAAACGTTGGCGGACAGCAGGCCGCGCGTCCGCGGGAGGTTCGCCAAGAACG	100	69	0R
chr1R	316.92	100028466|F|0--36:G>C	TGCAGATCCTTCTTGATCTGAGCAGTAACTCATTGTGGGGTGCAATCCCCTCGAATCTTGGGATGCTGA	100	69	0R
chr1R	317.286	3908610|F|0--64:A>G	TGCAGATTGGTGGGAAACGTTTGGATCATCAAGGAACAAAGTTTCGACGGCCGGCCGGCGACCCATTGA	100	69	0R
chr1R	320.466	100004542|F|0--58:T>C	TGCAGTTTTTGGCCAGAAACATTTTAGTACGTGTCACGAGCTAACAAATGTTTATGATTGTAATATCTT	100	69	1R	107.5
chr1R	320.936	100039576|F|0--13:C>G	TGCAGAAAGCCTTCAAAGTCCTCCTTGGCGACATGCGTGACCCCAAAATGCTCTACTCGGACAGGGGTC	100	69	1R	106.39
chr1R	321.601	100064502|F|0--52:A>G	TGCAGGCGGCGATAACTCTGCACGAAGCAGAAGTCTCACACCTTGGAGTAGGAGCCGAATTGTACAAGG	100	69	0R
chr1R	322.533	3589240|F|0--21:A>G	TGCAGAACCCACTGGAGCGCGACGGCGGCAAGGTGCTGATCACGGCGCGGCGTGGAAGCACCGCCCGCG	100	69	0R
chr1R	323.819	100004965|F|0--27:T>C	TGCAGTTAACGCAAAACATTGCATGCATCACAGTGGTTATAATCCGCAAAGCGTTGGACAGGAAATTAT	98.551	69	1R	109.73
chr1R	324.547	100002490|F|0--14:G>A	TGCAGCTGATTCATGACACATTTGTATGTAATTGTTCATGTTCAATTGTTTTCTTACTCACCAGGTGAA	100	69	0R
chr1R	324.548	100136503|F|0--68:T>G	TGCAGGACCTCCCGTGGCGTGCGGATGCTGGCGGACCAGTTCACCGCCGAGCCGCCGCCGACGGTGGTT	100	69	0R
chr1R	324.897	100055152|F|0--52:C>T	TGCAGCGATGGAACAGGACGCGGTGGCTCTTCCCGCTCAGGATCGTCTTCGCCCTCGTCAAAATCCTCT	100	69	1R	106.39
chr1R	326.095	3743051|F|0--28:T>C	TGCAGGTGGAAGAGGCCGCGAACTGTGGTGGCGGTCGGTTGGTAGACCCGTTGGTCGCTGCGGCTGTTT	98.551	69	0R
chr1R	332.609	3594546|F|0--49:G>A	TGCAGTATCTTGATCCAGATGTCCAGGTCCTCGCTCCTAGTCGATGATGGGCTCATCGGCAGGCTCAGA	98.551	69	0R
chr1R	334.094	100001758|F|0--49:A>T	TGCAGACAAAATACACGACGACAGTATGAGACAGACGCAGCAACAACACAACTAGGAGGCTACATGATG	100	69	0R
chr1R	335.371	100023851|F|0--43:G>C	TGCAGACCTCGCGCAAGAGGTACTTCGTGCTCGAGGACTCCGCGCTCCGCTGCTTCAAGGCCGCCCCGA	100	68	0R
chr1R	337.298	3731618|F|0--17:A>G	TGCAGCAAGTCCTCTTCATCCCGAAGAAGAGTTGGTGACCCCGGTACATTACCAAAACTTATTGTGTTT	100	69	0R
chr1R	337.312	100042224|F|0--34:G>A	TGCAGGGCACTAGCATTAAACCCATCCCAAAAATGAAGCCAAAGAAAAAATATAAATCGGCTCCCCTCT	100	69	0R
chr1R	337.767	3343443|F|0--18:A>G	TGCAGATGCTTCAGCGGGAGACACTTTTCATCTCACTTAATGCGACAAGTAGTTGTTGCGGCCTACTGG	100	69	0R
chr1R	337.768	100009453|F|0--63:A>T	TGCAGATGGTTCAGCGGGAGACACTTTTCATCTCACTTAATGCGACAAATAGTCGTTGCGGCCAACTGG	100	69	0R
chr1R	338.208	3882610|F|0--59:G>A	TGCAGTGGTCGACCTATTTCACCACGCCCAACCATACCAGTTTATTTTCGCTGAAGGGAGACCGAGTGG	100	69	0R
chr1R	338.208	100084612|F|0--16:C>A	TGCAGCTGAAAAGTGGCATTTCGAATACAAAAGTCAACTTCCAAAGTAAGGGAATCAAAACTGTAAAAA	100	69	0R
chr1R	354.858	100024832|F|0--18:G>A	TGCAGCACATGAATTTACGAATGACCTTAAATAAGGTTTGGAGTGTGATCTACTTTGTTGCCGTCTTGC	100	69	0R
chr1R	357.651	100100850|F|0--45:G>C	TGCAGCCAGTCATCATCGCGGACAAGGCATTCAGTCGAACACCTTGAGGGCGCCCTGGTGGAGGAGCTG	100	69	0R
chr1R	357.651	100100850|F|0--50:C>T	TGCAGCCAGTCATCATCGCGGACAAGGCATTCAGTCGAACACCTTGAGGGCGCCCTGGTGGAGGAGCTG	100	69	0R
chr1R	357.651	100007885|F|0--14:G>A	TGCAGAAGCTGCTGGCGGAAGCTACAGAGCAGCGGAGCAGCATCACCACCGCGCTCCTTGCGATCCAGA	100	69	7R	247.9
chr1R	358.605	100007998|F|0--48:G>A	TGCAGCATTGGGTTCATGCCATCAAGGGATTATATATGCTGGCCAACCGTTGAGCTATCACCGTGAGTC	100	69	0R
chr1R	359.533	100039744|F|0--33:C>G	TGCAGCGGAAAGTATCGGTAACGCGCGAGGACTCGTGAAATTTGAACGTTTGAAATGCCTCCTGGTGGC	100	69	0R
chr1R	360.852	3901095|F|0--16:G>A	TGCAGGGGCGCGGATGGCGTCGTGGCGACAGAAGATCCGATGAGAGCATTGCAGCTTGCGGGACAGTCG	100	69	0R
chr1R	361.163	100089178|F|0--43:A>T	TGCAGCCCCGAGCCGGCCGGACTATGAGCCGCCGCTGTGTCGTACTACTACGACCCGCCCTCGCCGAGA	100	66	0R
chr1R	361.256	5045861|F|0--50:G>A	TGCAGCGCGAGGCGGGGGAAGGGGGGGCGGCAGTGCAAGCAGGACGCGGCGAGCTGCGGCGCGCGAGGA	100	69	0R
chr1R	365.733	3589445|F|0--42:A>C	TGCAGCTGGGTCCTGCTCTTTTTAGGTTTCGTGCGTGGGGCCAGGCCCATCCTACGGATCAACAGAAAT	98.551	69	0R
chr1R	365.994	3741527|F|0--50:T>A	TGCAGAAAATTTCTTTACACTATCTGCTCGCGCTTAAACCCATGAATTAATTTCTTTCAGGAGGCAGAG	100	69	0R
chr1R	365.994	100073540|F|0--61:C>G	TGCAGTCGAGCCTGTCGGTGGCCAAGAAGAGCCTGGCCCTGGACGAGACGCCGAGGATGTCCGACTCGT	100	69	1R	107.5
chr1R	369.515	100049994|F|0--47:T>A	TGCAGAGACATCAGAGTTCAGTTGGACCTGAATCAGTTGATTTTTTTTAAAAAAAGGAGGTTGAAACCC	100	69	1R	109.73
chr1R	369.515	100049994|F|0--48:A>T	TGCAGAGACATCAGAGTTCAGTTGGACCTGAATCAGTTGATTTTTTTTAAAAAAAGGAGGTTGAAACCC	100	69	1R	109.73
chr1R	369.76	100031161|F|0--45:C>T	TGCAGACACTCGTTGTTGACATGTTTCTCTTCGCCCTCACATCTTCAGTTGGAATAGAGTGGCATGCCA	100	69	1R	106.39
chr1R	370.163	100030272|F|0--49:T>C	TGCAGACATTTGTTTTGAGATAGAGAAATCACTGCGGACTTTATGATGCTTACTAGCTGTGCGTGTTCT	100	69	1R	108.06
chr1R	370.164	3581010|F|0--8:C>T	TGCAGACGCGGTGAATCGATTCCTTGGTGCGCGGTGCTTGCGGAGGGGAGCGAGATGGTAGAGAAGCGC	100	69	0R
chr1R	370.421	100055321|F|0--34:C>G	TGCAGACACGCGCAAAAGCAGTGTGTCACTGAACCAACAAAACGAACGAAAGTGCACGTCACAGTAGGG	98.551	69	0R
chr1R	370.817	100026598|F|0--28:C>T	TGCAGTGTAGCATCGGCGGTGGCTGCAACGGAGCTTTGTTGTGTTGCTAGCAAGGGAAGGGCTCCTGCT	100	69	1R	106.39
chr1R	371.769	100022206|F|0--41:C>T	TGCAGTAAGCAAGATGAAGTGAACACATTGGACTTAAGAACCCTGCACCTTTCTAGCATGCGAACCCTC	100	69	0R
chr1R	371.769	3360403|F|0--41:T>C	TGCAGTAAGCAAGATGAAGTGAACACATTGGACTTAAGAACTCTGCACCTTTCTAGCATGCGAACCCTC	98.551	69	0R
chr1R	371.77	100012496|F|0--32:T>C	TGCAGCTGTGGCATGGCTCCTGGATCAAACTGTACCTCATTCCCACCAGCCTTGCATGTGAACCAGAAC	100	69	0R
chr1R	371.77	3352344|F|0--32:C>T	TGCAGCTGTGGCATGGCTCCTGGATCAAACTGCACCTCATTCCCACCAGCCTTGCATGTGAACCAGAAC	98.551	69	0R
chr1R	371.77	3352344|F|0--8:T>C	TGCAGCTGTGGCATGGCTCCTGGATCAAACTGTACCTCATTCCCACCAGCCTTGCATGTGAACCAGAAC	100	69	0R
chr1R	371.771	3889753|F|0--17:T>C	TGCAGGTTCGTAGCACATGCACCGTCATGCCGCTGGGCTCGCGTCGCGTGACAGGAGCTTCAGCGCCAC	100	69	0R
chr1R	371.771	3889753|F|0--22:C>T	TGCAGGTTCGTAGCACATGCACCGTCATGCCGCTGGGCTCGCGTCGCGTGACAGGAGCTTCAGCGCCAC	100	69	0R
chr1R	372.028	3360221|F|0--22:T>A	TGCAGCCGACGTTGTCATGGCATCCACTGCCTCCGCCACTCCCATCTGCCCCCTTGGCACCGCCGCTCC	98.551	69	0R
chr1R	372.042	3743675|F|0--25:T>A	TGCAGCTGATGCACCTCTGGTTCCATCCCGAGAAACCCCGCCGTCAACATTAAGCTTCACGTCATGCTC	100	69	0R
chr1R	372.048	100027449|F|0--28:T>C	TGCAGTCTAATTCTCTCTTTCTAGCAATTAGTTTCTATAATCTTGATGTACACTGAATTTGAGTTGAAT	100	69	0R
chr1R	372.253	100022474|F|0--16:C>T	TGCAGGTCCAAAAGCACTGCTAAGTATGCAGTAAAGTAAATGATTGACTGGAGCGAACAGAATTGAAGA	100	69	0R
chr1R	372.253	3348832|F|0--16:T>C	TGCAGGTCCAAAAGCATTGCTAAGTATGCAGTAAAGTAAATGATTGACTGGAGCGAACAGAATTGAAGA	98.551	69	0R
chr1R	372.918	3588061|F|0--43:C>T	TGCAGCAGGGGAGCCCCCTCTTCCTCGTCGCCGAGTCCTACGGCGGAAAGTACGCGGCCACGCTCGGCG	98.551	69	0R
chr1R	374.496	100021210|F|0--46:A>G	TGCAGGTACTCCATTAGCAACTGATGCAGCAAAACGGGGATTCTCCATGATGAGGTTGAGGACGCGAGC	100	69	1R	107.5
chr1R	375.153	100028566|F|0--52:C>T	TGCAGAGGACTATTGCGCGGCAGAAATCTCGCATCTCATGGCTAAAAGGGAGCGATGCGAGTGAGGTGT	98.551	69	0R
chr1R	375.403	100049610|F|0--33:A>T	TGCAGAGGCTGCTGAAGTTGTCTGGAACCGTGGACTTCTCAAGCGAGTTGGAATATGCCACGGTATAAG	98.551	69	1R	106.39
chr1R	376.285	100052759|F|0--63:T>A	TGCAGCACCAGCTTATGATGCACAGGTGAGAGTGACTTGGCATGAACACTGAGCATAACTTTCTTGCTG	100	69	1R	107.5
chr1R	376.449	3743663|F|0--11:A>G	TGCAGCTGCTCACGGAACACCCTGAGGATGTCGGCGAAGGTGACGATCCCGGCAAGACGGCAGTCGTCC	100	69	0R
chr1R	377.042	100006746|F|0--53:G>A	TGCAGAGATTTGCCCAACTTTTATGATTTCTGCATAGGTCTACAAATACATCAGTTACTACTCTCAGTA	100	69	1R	106.39
chr1R	377.733	100025800|F|0--18:G>A	TGCAGATTACATGACATGGATCAAATTGGTTTCAAATGTGAAATGTACGACAAACCTCATTCTTCACTT	98.551	69	1R	107.5
chr1R	377.733	100025800|F|0--48:G>T	TGCAGATTACATGACATGGATCAAATTGGTTTCAAATGTGAAATGTACGACAAACCTCATTCTTCACTT	98.551	69	1R	107.5
chr1R	382.306	100031149|F|0--12:A>G	TGCAGCGAAAGAACAGGCTGGTGAAAGAATGGGAAATGGATCTGGACATGAATCATGCACGCTTTTTCA	98.551	69	0R
chr1R	382.546	100040563|F|0--15:T>G	TGCAGGAACGCGCGCTCCGTCCGTCACGCCTCAAATCGAACGCGAAAAAACAAGAACCAAAAACGAAAA	100	69	0R
chr1R	382.546	3596327|F|0--15:G>T	TGCAGGAACGCGCGCGCCGTCCGTCACGCCTCAAATCGAACGCGAAAAAACAAGAACCAAAAACGAAAA	98.551	69	0R
chr1R	383.378	100076958|F|0--46:C>T	TGCAGCCACACACGTATGCCATTTGCAAGTAAATCAACAATGAACTCGTAACGGGTATAGGAATGGCGA	100	69	0R
chr1R	383.378	3600737|F|0--39:A>C	TGCAGCCACACACGTATGCCATTTGCAAGTAAATCAACAATGAACTCGTAACGGGTATAGGAATGGCGA	100	69	0R
chr1R	383.38	100032395|F|0--68:A>G	TGCAGCAACAAGAACAAGAACCCGTCGTCAGCTCTGCTGCTAATGCCATTTTGATTACAGTTACGTATA	100	68	0R
chr1R	383.615	100004049|F|0--61:A>C	TGCAGCAGGACCTTGAGAATCCTATCTGCCAACCTCAATTCCTCACGGGGCCTCCGCCTGGAACCGAGA	100	66	0R
chr1R	383.615	100004049|F|0--51:C>T	TGCAGCAGGACCTTGAGAATCCTATCTGCCAACCTCAATTCCTCACGGGGCCTCCGCCTGGAACCGAGA	100	66	0R
chr1R	383.811	3743533|F|0--22:C>G	TGCAGATACTATCACACAAACCCTTGCATCATCGACGCGTATACCTGCATTCAAGGAATACATAGACAA	100	69	0R
chr1R	384.193	3361320|F|0--8:T>C	TGCAGATTTATGGGATGACACCCTTCGAATGGCCGAGATACAATCATCAAGTGCACCAAAGTGTTCACG	100	69	0R
chr1R	384.716	100037902|F|0--29:T>C	TGCAGGTGCAGGTAAGCCGCCTGGAAAGATGACGTCGTCGCGAGTGCCGCCTCCAAGGCGGCCTCCTCT	98.551	69	1R	107.5
chr1R	384.719	100019767|F|0--59:C>T	TGCAGGCCGCCTTGTTATCCTTGTGTTCTTCTTTTCTTTTGATGGGAATGTTTTCCTTTCGTTCTGACG	98.551	69	1R	106.39
chr1R	385.334	100018589|F|0--64:C>T	TGCAGCAGATTCTTCTTACCAAGCCGAGCGAGCTGTTTCGTGTAAAATCAAATCTTCGCGTCCGCCTGT	98.551	69	1R	107.5
chr1R	385.772	3601956|F|0--13:C>T	TGCAGCTGCCTTGCACGAGTATGAATCATCGTCAAAACCGACACAAGCAACGGCAAAAAAGAGAAAAGA	100	69	0R
chr1R	387.051	3577451|F|0--21:C>G	TGCAGTGCCATGAAATTGCATCTCCTGAACCGAAATAAACCAAAAGACCAACACAAGACTCCCAGCTCC	100	69	0R
chr1R	388.372	3731213|F|0--5:T>C	TGCAGTGGAGATCGAGCATTACATTCTTCTGCAAGCTCAGTTTCCTGACGCAAACAGGCACGGTATGAT	100	69	0R
chr1R	389.35	100032332|F|0--29:A>G	TGCAGTATCAGAAGACAGAAAAGAAAATAAAAAAAACAACAACAAAATGCAAGAGAAAACCACCAAACT	98.551	69	1R	107.5
chr1R	391.038	4096101|F|0--43:C>A	TGCAGCTGGAAAGCGTACTTCTCCGGCCGGTTCTTATCCACCGCCGGAGTGAAATCCTCCTTCGCCGAG	100	67	0R
chr1R	391.04	3349611|F|0--25:C>T	TGCAGCAGTCTTCTGAAAACCTTCTCGCTTCCGGTCTCCAGCCAGCCGATGCATTCCTCAAACTTCTCT	100	69	0R
chr1R	391.04	100054046|F|0--32:G>A	TGCAGCTCCGCCACGCTCTGCTTGAGCGTGACGAGCGTCGACAGGAATGTGCCGTAGGCGTCAGCAAGC	98.551	69	0R
chr1R	391.503	100039567|F|0--15:G>C	TGCAGATACAATGTGGTGATGCTGAGAAATATTGCAATGCGGGGAAGTGAAAGTGCTACACCCACATGA	100	69	0R
chr1R	391.533	100069185|F|0--61:G>A	TGCAGATTTGTGGCGATCCTGATAATGCGGGGAAGTGGGAGTGCTGCACCCACGTGATACTGCTGCTAA	100	69	0R
chr1R	392.14	100052947|F|0--29:C>A	TGCAGTGAAACACGAAAATATCACGAAAGCGCTACACGGAAACTCACCGCCCCCCGCCGTGCCATGCGG	100	69	0R
chr1R	392.228	100053555|F|0--50:C>T	TGCAGGAGAGGGAGTCTCTCGGCCGCCTCGAAGAGCATAAGCACGTCCGACGCAGACGTGTAGCACAGC	98.551	69	1R	106.39
chr1R	392.957	3743782|F|0--27:G>A	TGCAGTGCTATTAAGCGTCACACGATCGGAGACGCGCAGAAACACGACGGCGCAGTCTCCGGCACACTC	100	69	0R
chr1R	393.878	100092965|F|0--15:A>T	TGCAGCCTGTTGCGCATCTCTTCGTTTCGCCTTCTCTTTGGCTGGTATCGGATGTGTTATAGAGCCATC	100	69	0R
chr1R	394.997	100081926|F|0--64:C>T	TGCAGAACACCACCCAGTTCGGCCTCATGGCCGTCAGCCTCGGCTACTACGACACCCTCATGTCCTGCT	98.551	69	1R	106.39
chr1R	394.998	100071988|F|0--67:C>G	TGCAGGACGGCGCGCTGATGCTGCTGGGCCCGACGATGAACGCCAAGGTGGCGTCCGAGCTGGCGGCCC	100	69	0R
chr1R	396.166	100015078|F|0--30:G>C	TGCAGCGTGGGGACTATCAGGCTATTGTGGGCTCGTTGCAATGGTTCGATCTGTTAAGACTCCCGCTAC	100	69	0R
chr1R	396.166	5138982|F|0--47:G>A	TGCAGCGAGGCAGTGGGTGGTCGGACCTGTGGGTCGTCCCCTCCCTTGACGCCCCCGCGCGCCATGGAC	100	69	0R
chr1R	396.966	4104687|F|0--56:C>A	TGCAGGCAGCACTTCTTGCTGCTGTATCCCGGGTGGCTGCGCGCGTCCCGGAGGAGCACGGTCTGGCTG	100	69	0R
chr1R	397.178	3885129|F|0--12:C>A	TGCAGCTCGGCCCCGGCCACACCGCGCACGACGCCTTCCTCGGCGCGCGCCTCGCCTGGACCAACGGCG	98.551	69	0R
chr1R	397.801	100000847|F|0--6:G>A	TGCAGAGGCCGCAGAGATGACAACAGAAGATGAGCCACTAAACCCTTGAAGCACACCAGCAGCCATTGA	100	69	0R
chr1R	404.768	100012802|F|0--15:T>C	TGCAGGATCGATCACTAAAACACCAAAATCTTGGCTGTAAAACGGGAGAAAAAGAAACACAGCCGAGAT	100	65	0R
chr1R	404.769	3909791|F|0--26:C>T	TGCAGGTGCAGCGACGATGATCCATGCGGCTCAACAGAAACGCTGGATGGCTCCGAGGTGCAATCTCCG	100	69	0R
chr1R	405.121	100027828|F|0--46:A>G	TGCAGCAGCGCTGAAGACCCCACCCCATGGGGGCAAGTGATAACTCATGGACGGATAGCGACTGCTCGA	98.551	69	0R
chr1R	406.074	100031044|F|0--54:C>G	TGCAGGCATCCACTAGATTAGCAACGCTCCCACCTCAGTCCTCAGTCAGTAAAGCAAGAAGCGGACAAA	100	69	1R	106.39
chr1R	406.074	3742846|F|0--10:A>G	TGCAGATGCAAAGCGACCTCGACGCTCTCGCCGGGAAGCTGGACCTCAACCTCCGGGACTGCGCGCTGC	100	69	0R
chr1R	406.075	100092794|F|0--64:G>A	TGCAGCGTCTGTCAATGTCGCCCGAGATTGCTCGCGCAATCGTCGGCCACAGCGGCGTCCGTCCGCTCA	100	69	1R	106.39
chr1R	406.075	100059093|F|0--65:G>C	TGCAGGCACTCCGCCGCGTACTCCTTGGAACCCAGCACGACGCCGCGGTCGAGCAGGCTGATCATGACG	98.551	69	0R
chr1R	406.805	100150411|F|0--16:G>T	TGCAGTCCAGAATTTCGCCCATAACCATTCGATCTCAGATCCAACGGCGGGAGCACCTGATATGTGCTG	98.551	69	0R
chr1R	408.165	3583590|F|0--53:A>C	TGCAGGGAGACCGTCATGACCATCTGGCACTACCACGGCGGATGCCACGTCGGAGCCGTCGTCGACGAC	98.551	69	0R
chr1R	408.257	3910174|F|0--23:A>T	TGCAGTCAAGCGAGATTGCCTAAAAAAACTGACTTGGTCGAAAAGAAGAAATAAAGATGTAAATGTTCC	100	69	0R
chr1R	408.5	5215439|F|0--67:A>G	TGCAGGGAGAGGAAGAGGAAGGCGATGACCCACCGGGACTCCATGAGCGGCGGCGAGGTGGAGTGGGAC	100	69	0R
chr1R	408.5	100106529|F|0--19:G>C	TGCAGCCGCTGCTCGGCGCGTCCTACCTGCGGGCGAGGAAGAACTACATCGTGCACCTCCACCCGAGGG	100	69	0R
chr1R	408.847	100014804|F|0--8:A>C	TGCAGAGCAGCGCACACCTGAGCCGCCGCTTCGTCCTTGTCGCCGTCCAGCCTTCCCCTCAGGACCCGA	98.529	68	1R	109.73
chr1R	408.847	3355117|F|0--25:G>C	TGCAGCACCTGGAGGTGGCCTTCGTGGAGTGCAGCCAAGGGAAGGATTACTTCGGCGGCGACAGCGTCA	100	69	0R
chr1R	409.065	100019812|F|0--58:G>C	TGCAGGCCGCGAGGGGCAAGACGGAGGAGGAGAAGGCGGAGGGGCTGAAGCAGACGCTGGTGGCGGTGG	98.551	69	0R
chr1R	409.079	100006683|F|0--29:A>G	TGCAGATGAAAGGCGTCGGCTACGAGTACATGGAGCAGGACCTGTTCACCAAGGGCGAGCTGCTCCGCA	100	69	0R
chr1R	409.1	100063320|F|0--25:C>G	TGCAGGTTGGGTCGCCGTGGTTCACCATCCTGTTCGCCCGCAAGACCGAGGAGAAGATGGAGGCGGCGG	98.551	69	0R
chr1R	409.1	3363817|F|0--25:G>C	TGCAGGTTGGGTCGCCGTGGTTCACGATCCTGTTCGCCCGCAAGACCGAGGAGAAGATGGAGGCGGCGG	100	69	0R
chr1R	409.724	100015009|F|0--32:A>G	TGCAGTCACTCTTGATTCCCAGATCCCAGCGAACACAGGTAGACACAGCACTCGTACACACAAATTTAC	100	69	0R
chr1R	410.325	5041129|F|0--49:C>G	TGCAGCCCACGGGGAGGAGCTCGTCGTCGCCGCCGTGGTAGATGGTGACCCCGCAGGTGAGCTGGTCCT	100	69	0R
chr1R	410.433	100021613|F|0--68:C>T	TGCAGAAGAGAGGCCAGAATCTTCACCCAAGTGGGAGGAGGAAGAGAACTATTTGGCCTTCACCAACTC	100	68	1R	111.44
chr1R	410.776	3900517|F|0--43:C>T	TGCAGGGCGGCGCCGCCGACGAGGGAAGGCGGCACAGGCGCACCGCTAGCGAGGGCGGCGGCAGGAGGG	100	69	0R
chr1R	410.819	100018534|F|0--12:G>A	TGCAGCTGAGTCGGCCCAAACATGTTGCGCGGCCCGGCCCATTCCGTGCCGGCGACCGCCGCCACCGCC	100	69	0R
chr1R	411.194	100029250|F|0--15:T>A	TGCAGTGATGCAGATTCTCTTTAGTAATGACTATGCAACAACACATGCAAGTTCAGGGATTCAAAATTT	98.551	69	1R	109.73
chr1R	411.661	100037261|F|0--22:G>A	TGCAGCGCCAACAATCAGCAGAGCAACCAACAAGGTTGTAGCCGCTGTCACAGATGGCCTACCGACCGT	98.551	69	1R	109.73
chr1R	411.661	3732140|F|0--64:A>G	TGCAGCGCCAACAATCAGCAGAGCAACCAACAAGGTTGTAGCCGCTGTCACAGATGGCCTACCGACCGT	98.551	69	1R	109.73
chr1R	412.051	4489594|F|0--26:A>C	TGCAGAGAGCAAAGAGGACATCCAATAAGATGCACGAATTCGGACAATTTACCAAACCTGTATGTACTC	100	69	0R
chr1R	412.539	3736206|F|0--68:G>A	TGCAGCTCGGCGGCGTCCATGCTCTGGATCTGCGTCGACGACGGCGGCCAGGAGGCGGAGGACGACGAG	98.551	69	0R
chr1R	413.098	100037958|F|0--19:T>C	TGCAGGCTTGCAGCTACCGTGAGGAAACTTTAGTCGATGCAATCCTAGCCCCACGAACATCCAAGCAGT	100	69	1R	111.44
chr1R	413.736	100070395|F|0--26:C>A	TGCAGGGCGCCAAGCAGTTGAAATCTCCCCCGTGTGAAGCGCGGGGTTCGTGAATCGGTTACCTCGGTT	100	69	1R	111.44
chr1R	413.758	100032338|F|0--22:G>T	TGCAGGTATGAACGCCCTTAGGGGCCCATCCGAAGACCAGAGTTGCTTTAGTACTTAAGTACGTAACCG	100	69	0R
chr1R	414.157	100003074|F|0--49:A>G	TGCAGCTCTTCTGTGGCGACACCGTCCTGCTCAAGGGCAAGAAGCGGAAAGACACGGTCTGCATTATGC	98.551	69	0R
chr1R	414.157	100023166|F|0--30:C>T	TGCAGGGTCGGTCTCGATAACTTTGAACTCCACGCTTGTCATTCCGCCCCTCACAAGGAAAAGGTCTCC	98.551	69	0R
chr1R	415.367	5222566|F|0--38:G>C	TGCAGCCCGCGCAGGGCGTCTCTCGGCCGTCGGATGGCGGAGCCGCGGCGTGCACGCACGCATGCTTTG	100	69	0R
chr1R	416.305	3348753|F|0--36:T>G	TGCAGCACACAATGCCAGTCATTTCAGGCCTCAAAGTGAAAATGATACGGCAATTCATCATTCATGACT	100	69	0R
chr1R	419.013	100004026|F|0--62:G>A	TGCAGCCACAATGTGCATCAGCCATATACTTGGGTGCATGCGGAATTTGATCGAATGAGAAGGAAATGA	98.551	69	1R	111.44
chr1R	420.742	100106498|F|0--10:T>C	TGCAGCCGCGTGAGGAGCCGCGCCATCGATGGTGGCGCGGGTGGAGCTGAAACAATAGGGAGCCGCGCA	98.551	69	0R
chr1R	420.971	100077824|F|0--15:T>A	TGCAGCGCCCCAAGTTCGACTTCGAGAGGTGGGACTGGGGCTACTTCGCATGGCCGCACGACCGTCTCG	100	69	0R
chr1R	420.972	100078433|F|0--28:G>C	TGCAGCGTGCTGTGACTCGGGAAGCCGTGGCTCGCCTCCAACTGCGGCGAGCTCTGGCTCTGATACGGG	100	69	0R
chr1R	421.905	3596898|F|0--23:C>A	TGCAGGCCCAGGGCGCGGCGGAGCCCGCCTGCGATCTCGTTGACGAAATCGGTGGGCGGCATGACGGCG	98.551	69	0R
chr1R	421.905	100080940|F|0--57:A>G	TGCAGGAGTTCGTCAACCACGGGGGCGTCATCTTCAAGGTTTACGTCGTCGGCGGCCACGTCACCTGCG	98.551	69	0R
chr1R	422.157	100050416|F|0--12:T>A	TGCAGTGATCAGTAGAGCGTTAGTACGGCCTGTCTGATTGAGCAATGAGTGAGAACTGCATGCAGGACA	98.551	69	0R
chr1R	422.552	100030297|F|0--68:G>A	TGCAGCTCGGACGCCTTGGCGATCCTTGGCTGCCTCTGGAAACACAAGAAAATCAGTCACGACTTCACG	100	69	0R
chr1R	422.553	3597375|F|0--22:G>A	TGCAGGACCAAGCAAGCAAGCAGCAGAGGCCAGGGCGCCTTCCCCTATACACAATGCCGCCCGTGCCGC	100	67	0R
chr1R	422.553	100031102|F|0--51:T>A	TGCAGCAAGGCTAAGCCAGCTAGCCCCTTGCTGAAGTTCGCAATCTCGCGCTAGCTTCTTAGCTGCTTG	100	69	0R
chr1R	422.564	100002001|F|0--59:A>G	TGCAGTGGTACGGCACTAGCGCCAGTGTTTTCTCTGAATTCTTATCCAACCAATTAGCCACTGCAACAT	100	69	1R	109.73
chr1R	422.564	100147399|F|0--32:T>C	TGCAGTGGTACGGCACTAGCGCCAGTGTTTTCTCTGAATTCTTATCCAACCAATTAGCCACTGCAACAT	100	69	1R	109.73
chr1R	422.945	100012012|F|0--23:T>G	TGCAGGCAAGTAAAGGGCTACGTTAGGACACGGGGACAGCATAACACAGCAAAGAAAGAAATCGAGCAC	100	69	0R
chr1R	422.945	5040289|F|0--23:G>T	TGCAGGCAAGTAAAGGGCTACGTGAGGACACGGGGACAGCATAACACAGCAAAGAAAGAAATCGAGCAC	98.551	69	0R
chr1R	423.127	100027320|F|0--26:G>T	TGCAGATCAGCAAGGGAAGCAGCCAAGAAGGAGATGGAAGGGGACTGCTTGCTGCTGCATGGGGCTCGC	100	69	0R
chr1R	424.206	100070006|F|0--38:C>G	TGCAGAGCAGGGCCAATAAAGCGACGGAGGAAGTCGACCCAGAAAATATGTGTGTGTCGACCGATCGAT	100	69	1R	112
chr1R	424.465	100079309|F|0--31:G>A	TGCAGCTTTGGAATCAGTTCCTCCTGCTCCAGGACGCAGGGCAGCACGGTCCGGCCATCAGGCAGCGCA	100	69	0R
chr1R	424.58	100048318|F|0--52:G>T	TGCAGATCAGCCACAAGATAACAGCATAGCAACAACATCACGAGGAAGAAGAGAGTCAAAGTGAAGAGC	100	69	1R	112
chr1R	426.929	100041240|F|0--21:T>C	TGCAGGAACAATGGGGGAGGCTGCGTCGGCATCGGCATCGGCATCGTAGAAGCGTGAGCGACCTGGGTT	100	69	0R
chr1R	426.93	100032145|F|0--68:C>T	TGCAGGTGAATATGAAGATAAATAAACTGCGGGAGACTGTGAAGGCACAACAAGAAAAGGTAACCAGCC	100	68	0R
chr1R	427.196	5206532|F|0--35:T>C	TGCAGCGTCGCCATGGCTGGGATGGGCTGCTAGGGTGGACGGACGGGCTGCTCGTCGCTGGGTTTGCCG	100	69	0R
chr1R	427.44	100071076|F|0--40:G>A	TGCAGCGGTAGTAGCCCCTCGGGTACGGCGACCCCTTGATGGGCTTCTGCCCGTACTTCCTCCACGCCC	100	69	0R
chr1R	427.889	5214517|F|0--61:A>G	TGCAGATGGCGTCCTCTGCTGGTAATGGCAAGGAGATGGCCACGCTCGAGTCCGGCCATGCATCGTCGT	98.551	69	0R
chr1R	427.89	3904320|F|0--11:G>C	TGCAGCCACGAGACGAGCGTCCCGGCGACGAAGATGCCGAGGTTGATAGCGCCGAAGAACCAGGTGAAG	100	69	0R
chr1R	428.623	100069867|F|0--53:G>C	TGCAGGATGGTCGCCGCCCACGTCCACTGCGACACGATCACGCTGGCGATCAGGCCCGTCTTCACGCTC	100	69	0R
chr1R	428.624	100047277|F|0--37:A>G	TGCAGCTCTCCCAGTCGTAGTTCTGCGGCGACACCAGACTGCACACGCAGTGCACGGCCCCGCCCACCA	100	69	0R
chr1R	428.624	3363877|F|0--37:G>A	TGCAGCTCTCCCAGTCGTAGTTCTGCGGCGACACCAGGCTGCACACGCAGTGCACGGCCCCGCCCACCA	98.551	69	0R
chr1R	430.434	100005489|F|0--14:G>A	TGCAGCAAAAGGAAGAACAAAAAGGAACGAAAAATTGGATCAGGTCCTGACATATATCTTGGGAAATTT	100	69	0R
chr1R	431.246	100015460|F|0--15:G>A	TGCAGGTTTGTCATCGTCGCAGCCGCTAATTTAGCTTTGCAAGACATTACAGATTCTGTCTAAATATAT	100	69	0R
chr1R	431.741	3908105|F|0--50:C>T	TGCAGCATATGTGCGTGCTATCATCACTCCTTCGACAGCAGCAAGTAACTCAGCTTCAAGGGAATCATC	98.551	69	0R
chr1R	432.074	3906027|F|0--67:G>A	TGCAGTTGGCCCTGATCTTGCCGCTGCTGCCGGTGAGCGCGCCGATGTAGCCCATCTTGACCATGGCGG	100	69	0R
chr1R	432.426	3734120|F|0--22:C>G	TGCAGGAGCGCACCAGCGCAAGCAGAATGGGCTTCATGCAACTTTTGACTTAATTTTTTTGACTAAACT	100	69	0R
chr1R	434.434	100011622|F|0--39:A>G	TGCAGAAGGCATTCCCCTTGTCCTTCTCAGCTTGAAGTTAGCTACACTACTCACAACACGAGAGAGCAC	100	69	0R
chr1R	434.434	3581379|F|0--39:G>A	TGCAGAAGGCATTCCCCTTGTCCTTCTCAGCTTGAAGTTGGCTACACTACTCACAACACGAGAGAGCAC	98.551	69	0R
chr1R	437.105	100022534|F|0--51:T>C	TGCAGCACGGCCTGAAAGTACAACAGCAAACCTTGATGCAGCCACAATGGCTGCGCAAGAGCTTGACCG	100	69	0R
chr1R	438.007	3890889|F|0--24:A>G	TGCAGGTGCACGTCAGCGAGGAGCAGCGCGGCGGCGGAGCACACAACGTGCGGGTGCGGCGAGCACTGT	100	69	0R
chr1R	438.007	3746066|F|0--68:C>G	TGCAGCCCGTGCCGCCGGGGCACGGGACGGTGCACCCGCACTTGTCGTCGCAGCCCATCTCGAATTCTC	100	69	0R
chr1R	438.358	100064387|F|0--26:G>A	TGCAGATGTACGCCCGCTGCGCGGACGCCGCCTATGCTCGCAGGGTGTTCGACGCGATGCCCCACAGGG	98.551	69	0R
chr1R	438.358	3365021|F|0--26:A>G	TGCAGATGTACGCCCGCTGCGCGGACACCGCCTATGCTCGCAGGGTGTTCGACGCGATGCCCCACAGGG	100	69	0R
chr1R	438.518	100032124|F|0--36:T>C	TGCAGAGACACGAATCCCGCTTGTACAGTAGAGTCTTTTGCTTTTGATCTTGCCTCCTGCTGATCCTAA	98.551	69	0R
chr1R	439.201	100030382|F|0--59:T>A	TGCAGCAATGCATGTGACTGCACACTATGCCAAGAAGTCCGCGCGTATCGACAACGCCCTGGAAAGATT	100	69	0R
chr1R	439.427	100041268|F|0--64:T>G	TGCAGACGGAGGCGCAGAGCTTCGACGTGCCCAGCGCCGACATGATCTACAGCCTCGCCTACCTTCCGC	98.551	69	1R	113.66
chr1R	439.985	100109355|F|0--10:C>G	TGCAGGTGGCCACGTTGGCGTCGGTTGCGGCGGCGGTGTACCTGAGGGCCTTCGTCCAGGAGACGGACC	98.551	69	0R
chr1R	439.987	100029125|F|0--30:C>T	TGCAGCAAGCCGTACGTACACTCCCATGCGCGCACCTCTCCGCATCCGTTTCTTGGTTCTTACTAGCAC	98.551	69	1R	112.55
chr1R	439.989	100037284|F|0--9:C>G	TGCAGAAGACGACCTGTCAAGGACCTTGATTCAAGGACTCACCTCATTGAGCACCAAAGAAGGAGGCCA	100	69	1R	113.11
chr1R	439.989	100082712|F|0--9:G>C	TGCAGAAGAGGACCTGTCAAGGACCTTGATTCAAGGACTCACCTCATTGAGCACCAAAGAAGGAGGCCA	98.551	69	0R
chr1R	441.414	100173335|F|0--31:T>C	TGCAGTCTGCATCGGTGTGTCAGCCGTCGCGTCAGAGTGAGGTACATCAAATACTGCGCTATACGAAAC	100	69	0R
chr1R	441.586	3744990|F|0--32:C>T	TGCAGCGGAACCGGCCAACACCTCTTTGCCTACGGCGATGAGTCGCTGCGCGGAGTCCGCACGTGGCGG	100	69	0R
chr1R	442.321	5045058|F|0--23:C>T	TGCAGACATTTGGCGTGCAGGGCCGGCACCCTTGCCAGGACGTGGAGCATGTGGTCATCCCGCCATACG	100	69	0R
chr1R	442.831	100059556|F|0--18:A>G	TGCAGCTTTTGGGCGTCCACAGCTCGTGAGGCGGAATGATTCCGCCACTGGTGCTGCTAATAAATGTGT	100	69	1R	112.55
chr1R	443.1	100048461|F|0--29:A>G	TGCAGGGATTAAAAATCGGGGTACTACTTAAAAATAAAAATATACTGCTAGTATACTTCAGCAGGAGTA	100	69	1R	113.11
chr1R	443.153	100003660|F|0--58:A>G	TGCAGGTAATATCTTTGACCACTGTAATTAAAATGCCTTCTTCAGTCAGTCAATCATAACTGCAATTAA	100	69	1R	113.11
chr1R	444.072	100003522|F|0--23:G>A	TGCAGCAAAGCCTTCCAGTACCTGGAGCAAGACGGGTTCTGGTGTATCGCCCTCAGAAGCCACGCCCCG	100	69	0R
chr1R	444.072	100003522|F|0--59:C>G	TGCAGCAAAGCCTTCCAGTACCTGGAGCAAGACGGGTTCTGGTGTATCGCCCTCAGAAGCCACGCCCCG	100	69	0R
chr1R	446.21	100038621|F|0--11:A>T	TGCAGCATACCAGTGTAGATGTTGCAGACAGGAGCGCAAAGCAACTACAGGGAAATGGATGGTACTGTA	100	69	0R
chr1R	448.858	100062120|F|0--32:T>C	TGCAGATGCAGGAGGCGAGCCTTCGGACGAACTTGGTCCAGGCGAAGCAGAAGCGTGATCCCGTCATGG	98.551	69	0R
chr1R	448.858	100137331|F|0--32:T>C	TGCAGATGCAGGAGGCGAGCCTTCGGACGAACTTGGTCCAGGCGAAGCAGAAGCGTGATCCCGTCATGA	98.529	68	0R
chr1R	449.23	3589346|F|0--23:T>C	TGCAGGACAAATTAATAGCAAAATCAAGGCAAGATGCTGAAATTTAGGAAGGGGCGTATGCCTTTTCCC	98.551	69	0R
chr1R	450.994	3746274|F|0--15:A>G	TGCAGGTGTGGCTCTAGCTCTTACCGTGTGAACTCGATGTCGATGATGCCGGAGTGGCGGAGCCTGTCG	98.551	69	0R
chr1R	450.996	5225117|F|0--5:A>G	TGCAGATGCGTCTGCATGGAGGAGGTCGATGGCGTTGGGGAGTAAAAAAGATCCGATCAGCGGCGAGTG	100	69	0R
chr1R	450.997	100045132|F|0--42:T>C	TGCAGCAGAGATTCGTGCCACCGCATGAGAATCAATCACAAGTTCGAAGGGAACAGTGCGCGCAGATTT	100	69	1R	114.22
chr1R	450.997	3749724|F|0--38:C>A	TGCAGCAGAGATTCGTGCCACCGCATGAGAATCAATCACAAGCTCGAAGGGAACAGTGCGCGCAGATTT	98.551	69	0R
chr1R	452.731	100018016|F|0--61:C>T	TGCAGTGCACGCTCCAGCAATCCGAGCCCACCCAACCACCGCACGCTCCGCGGATCCTCCTCGTGCTCC	100	69	0R
chr1R	454.267	100010699|F|0--68:C>G	TGCAGGGCATGCATCCATCATGCATGGTCGCATCCCGCATGCATGGATGCACTAGCTAGCAATTCCTTC	100	69	0R
chr1R	454.268	3742862|F|0--15:T>C	TGCAGCTGCACTGAGTGACCAGTGTCACAAGCCAGCGCTGGCTCGCCTGCACAGACAGAAAGAAAAGAA	100	69	0R
chr1R	455.673	100090317|F|0--52:T>C	TGCAGCTGCCTCACGGCGCGCCCTGCATCCGCTGCTCCATCTGCGGCGCCGTTACCAACGTCGCCGCGC	98.551	69	0R
chr1R	456.581	100022270|F|0--48:A>G	TGCAGGTGTAGGGTGTGAGTTGCAGGTTTACAGGCAGCACAAGGGTTCATTCTTCCATGAGGCTTATCT	98.551	69	0R
chr1R	459.6	100046875|F|0--65:C>T	TGCAGATCACCTTCAGCTCCTCCCAGAAGTCGGCGTCTCTAGCCGCCGCCACGCCGTCAGCAGCGCTGT	100	69	1R	114.22
chr1R	459.6	100083857|F|0--6:C>G	TGCAGCCTGCCGCCCCTCTCGCCGCTGTCGCCGTACCCGCACTTCGCCTTCCCGCAGCTCTCGGTCGTC	100	69	1R	114.22
chr1R	459.602	100008726|F|0--17:A>G	TGCAGAGTACCAACACGAGCAACCGAGTGAAATATAATTGCACTGCCTCATCGTTGTCAAACTCGAACC	100	69	0R
chr1R	460.406	100040261|F|0--31:C>G	TGCAGTGTCTACTGAAGAGAAGACGACGGAGCATGATCGCCATGATGGCAGCGCAGAGAATTGAGATCG	98.551	69	0R
chr1R	460.407	100106723|F|0--15:G>C	TGCAGCCTTCGGCAGGGGCGGTGGCATCAGCAGCACGGTGCCCGGCGTCGGCGACCTCCCGCAGCTTCT	98.551	69	0R
chr1R	460.525	100037796|F|0--39:C>A	TGCAGCTCAGACCACAGCAAGTATTTCTAAGGTTAAAAACACAAGAGATACATTTTCAAATTTTCACGC	98.551	69	0R
chr1R	460.525	100037796|F|0--19:A>G	TGCAGCTCAGACCACAGCAAGTATTTCTAAGGTTAAAAACACAAGAGATACATTTTCAAATTTTCACGC	98.551	69	0R
chr1R	461.072	100007690|F|0--31:C>T	TGCAGGATCACAGCACGAGAGGCAGAGGAGACCATGATCATTACTCGCAGCAGAGTTCGCAGAGCTTCA	98.551	69	0R
chr1R	461.18	100089142|F|0--8:G>A	TGCAGCCGGCGGTTCTCCTCGGTGAGCGTCTCGCAGCAGCGCTTGAGCGACTCGCAGTCCACCTCCGTC	98.551	69	0R
chr1R	461.334	100034344|F|0--12:A>G	TGCAGGGTGATCACGTACGCATGTCGGGTATAAAGCGTGCAAGCCGCAAGTTTAGTGAATCGATTCCAC	98.551	69	1R	114.22
chr1R	462.127	100026267|F|0--36:C>T	TGCAGGAAAATTGTGCTGATTGGTCCTCTTATGGTGCAGTGCCGCACTGATATGACATTTATGATTCTT	100	69	0R
chr1R	463.105	100058319|F|0--53:A>T	TGCAGCGGCAGCCTGTTCAAGCAGCTCTTCTTGCCTCCGACGAGGATCTTGGAAATCTCCGACGCGGAC	100	69	0R
chr1R	463.106	3364145|F|0--67:T>C	TGCAGGAGATGCGAGATGTTTGTCCCGTCCCTGAGCCTGAGCATGCCGAGCCTCGAGCGTGCGTGCGTG	100	69	0R
chr1R	463.106	100045883|F|0--33:G>C	TGCAGCGGTGCCAGGGACGGCCACCTCGCCACAGGACACCTAGCAGGGCAGCATGTATGGTACCTACTC	100	69	0R
chr1R	463.113	3594952|F|0--48:C>T	TGCAGTGCGCGCGTCAGTGCATTAACGCGGCTCACCAACTCATTCGCTCCCGCGCAGTTACTCCTCCCG	100	69	0R
chr1R	463.113	100003779|F|0--35:A>G	TGCAGCAGAGTAAATGGCACGAGCAAGAACTCGCCATGCCATTGACATGGCAATAGCTTCGACTCCGCA	100	69	1R	114.22
chr1R	463.113	100003779|F|0--54:A>G	TGCAGCAGAGTAAATGGCACGAGCAAGAACTCGCCATGCCATTGACATGGCAATAGCTTCGACTCCGCA	100	69	1R	114.22
chr1R	463.113	100186984|F|0--15:T>C	TGCAGAGTGCAGAGTTGCAGAGGAAGAGGAAGAGCGGGTCGGCGACGGAGAGCGACAGGCAGAGTGGAG	100	69	0R
chr1R	463.114	5218718|F|0--60:G>A	TGCAGCTGCGAGACCTGCCACGATCCAGCAATTGCCAACACCAATTACTCAGAAGGAAAAGAAGAGTGC	100	69	0R
chr1R	463.115	100032093|F|0--58:C>T	TGCAGACAAAGGAACTGATAGCAGAGATTGAATTGCTCGAAGAGGAAATCGCGAACCGCGAGCAGCACG	98.551	69	0R
chr1R	463.115	5139113|F|0--8:T>C	TGCAGGAATAGCAACAAGAATCAGACTCATCAGCACACAATTGAAATTGAACTAATTTTGTGTCAGCCA	100	69	0R
chr1R	463.117	100064771|F|0--16:G>T	TGCAGCAGCCAGCAGCGACGAAGGCGAGAACAATCTAGGCTAGCACCGCGGCGGCCTGCTTGTCGACCA	98.551	69	1R	114.22
chr1R	463.117	100064771|F|0--8:C>G	TGCAGCAGCCAGCAGCGACGAAGGCGAGAACAATCTAGGCTAGCACCGCGGCGGCCTGCTTGTCGACCA	98.551	69	1R	114.22
chr1R	463.405	3363914|F|0--67:C>T	TGCAGAGTTCTCTTATAGCCTCCAAAATTACTGGCGAAAAAGTCCCTAGGACTAATTTCAGGAGTGCCA	100	67	0R
chr1R	463.766	100035461|F|0--35:A>G	TGCAGCAGCAGATAGGAAGACGCAGGTAGCAAGCAAGCAGCACATAGCAAATCAGACAGCAATAGCTAG	100	69	1R	114.22
chr1R	463.766	3363879|F|0--35:G>A	TGCAGCAGCAGATAGGAAGACGCAGGTAGCAAGCAGGCAGCACATAGCAAATCAGACAGCAATAGCTAG	98.551	69	0R
chr1R	464.245	100030503|F|0--25:C>G	TGCAGCTTTTCTCCGTGGTTACTGCCCTGCTACTCCACGGACTTTATTTCTCACTGGTAGGTCAAGCAT	98.551	69	0R
chr1R	464.708	100003968|F|0--29:A>C	TGCAGCATGCCCTCCAGCATGCCTTGGTCAAAGCCATCCAGGTAGAGAGGTTCCTGCTGGCCCATCTCC	98.551	69	0R
chr1R	465.575	100150336|F|0--46:C>G	TGCAGTACCTGCGCAACCACAAGCCGCCGCTGACGCTGGCGCGGTGCAGCGGCGCGCACGTCATCGAGT	98.551	69	0R
chr1R	466.258	100063133|F|0--20:G>A	TGCAGTCCCGAATGGTACATGTCCTTTTAGCAGGTGACTGATCGATTGCGAGAGCGTTTTAATTAGGTG	100	69	0R
chr1R	466.699	100073478|F|0--14:G>A	TGCAGACACAGATCGGAAACCAACCCGCCGGCATGTCGTCCTCCAACGACGCCCCCGTCAGCCCTCGCT	100	69	0R
chr1R	466.699	100003256|F|0--35:T>C	TGCAGGCTGGAGCACAATCGGTGACGTGCAGTCAATTTCTAGCCACCGTCAGATTTCAATCCAAGGGCT	100	69	0R
chr1R	466.699	100003256|F|0--66:G>A	TGCAGGCTGGAGCACAATCGGTGACGTGCAGTCAATTTCTAGCCACCGTCAGATTTCAATCCAAGGGCT	100	69	0R
chr1R	467.998	3343662|F|0--8:G>A	TGCAGGGAGCTGTACGGATACTCCTCAAGACTTGCAGAGCTACTGACCAAACAGCTAAATTCAGCAACG	98.551	69	1R	114.22
chr1R	468.311	100042610|F|0--35:G>A	TGCAGCGGATAAGCACTTGAACGCCTAGGCCTCTTGTTCAAAAATTTCTCTGAAAATCGAAGGCAGGTG	98.551	69	0R
chr1R	468.648	3906661|F|0--44:A>G	TGCAGCCGATCAATCAAATTTTTTATAAAGAAAATCAATCAGATATTTTTTTGAGAACCAAAAAAAAAA	100	69	0R
chr1R	471.164	100063657|F|0--61:G>C	TGCAGTGGGTGAGGGAGAACATGGACCTCAACGCCACCAGGGTCTTCTTCACCAGCATGTCGCCCACCC	100	69	0R
chr1R	472.536	100025726|F|0--14:A>G	TGCAGACAAGCCTGACCAGGTTGATGCCCTTACGAGAGTTCTCTTTTCCTGGTTTCTCTGTGCAAACAT	98.551	69	1R	114.22
chr1R	472.536	100025726|F|0--6:C>G	TGCAGACAAGCCTGACCAGGTTGATGCCCTTACGAGAGTTCTCTTTTCCTGGTTTCTCTGTGCAAACAT	98.551	69	1R	114.22
chr1R	474.977	100105726|F|0--13:G>A	TGCAGCGGCGCATGCTCGGCCAAGGCGAGCCGTTGTTGTCATGCGGCGTACGAATGGTGAGAACGGAAG	98.551	69	0R
chr1R	475.48	100006438|F|0--15:T>C	TGCAGAAAACACTAGTGTGAGCGACAGGAATGAGCACAAAGGGAAGAAGAAGAAGATATAGGGGCCAAT	98.551	69	1R	114.22
chr1R	475.48	3344012|F|0--15:C>T	TGCAGAAAACACTAGCGTGAGCGACAGGAATGAGCACAAAGGGAAGAAGAAGAAGATATAGGGGCCAAT	100	69	0R
chr1R	476.105	100022005|F|0--65:T>G	TGCAGGCCATCGAGGCATGTCTCCTGGTTGGTCAGGATCGCCGAGAGCAACGTCTGCACGTCGTCTGCC	98.551	69	1R	114.22
chr1R	476.105	100077245|F|0--13:A>G	TGCAGGCCGCGTCAGGGTCGTGGTCCGACCGTGGCGGCGGCCTCGCCGAGCCGATCTCCAACGGCACGA	98.551	69	1R	114.22
chr1R	476.105	3744271|F|0--13:G>A	TGCAGGCCGCGTCGGGGTCGTGGTCCGACCGTGGCGGCGGCCTCGCCGAGCCGATCTCCAACGGCACGA	100	69	0R
chr1R	477.661	100101230|F|0--32:G>A	TGCAGCACTGACTGAGTTAAGGCAGTCCGCTGGCTGAAGCGATGAACTGCGATCATGGCGCGCGCACTG	100	69	0R
chr1R	477.743	3578489|F|0--6:T>G	TGCAGTTCGTGCAAGGTCGTCGATCTCCACTTCTCGACGCACGCACAAAACAATATACATTGATCAAAT	98.551	69	0R
chr1R	480.172	100055351|F|0--35:A>G	TGCAGTAACACGATGTTGGGCTTGACAACCCTTTCAAGGTCGCATCCGAGGAGATTGGGGCTGCGCTTG	98.551	69	1R	114.22
chr1R	482.197	3904535|F|0--15:G>A	TGCAGGTGAGGCAATGTGTTTTCCCATGGCAATCTTTGCGGCGGTGTAGAGGGCTGAGGCAACGAAGAC	100	69	0R
chr1R	483.939	100044306|F|0--25:C>T	TGCAGTTTAACAAACCGTGGTATCTCTAAAACTGTGGTATTTTTGTTGTATATAAAAAAAGAGACCCTG	100	69	0R
chr1R	484.191	100111309|F|0--17:T>C	TGCAGCCACCATTATATTGCTTCCTCTTCGTCTGCTTGTCCTCTTCTTTTAAAGGAGACACATAGGTGA	98.551	69	0R
chr1R	484.191	3745846|F|0--40:G>C	TGCAGCCACCATTATATTGCTTCCTCTTCGTCTGCTTGTCGTCTTCTTTTAAAGGAGACACATAGGTGA	100	69	0R
chr1R	485.436	5211308|F|0--65:T>C	TGCAGTGCACGGCTGCTGCTTGCGGAGGCTCTTGCGCGGCCGCCGCTGCTCGCCTACGGCTTCCCTGCG	100	69	0R
chr1R	491.627	100052391|F|0--29:T>C	TGCAGCCACCGCCGCCGCTCCATCCCCTCTAACCGCGGCACGAGAATCCACCGACCAAACACACCGAGC	98.551	69	1R	114.22
chr1R	491.627	3602483|F|0--29:C>T	TGCAGCCACCGCCGCCGCTCCATCCCCTCCAACCGCGGCACGAGAATCCACCGACCAAACACACCGAGC	100	69	0R
chr1R	492.437	100078988|F|0--54:T>A	TGCAGAACGGAATGTGGCATCAAATCGGTGGTGGTGGTTATGAGTTGACCGTGCTTGCTATGGCTAGCT	100	69	1R	114.22
chr1R	494.53	100022593|F|0--8:G>C	TGCAGCGCGGCCTGGTCGGGGGCGTACAGCCGCATGGAGTTGATGCCGTTGGACTTGAACATGCTGACG	100	69	1R	114.22
chr1R	495.771	3742589|F|0--37:C>T	TGCAGGTGTACTGGGGCGAGTTCCCCAAGGAGCGGGTCGACGAGGCCCACCGTGCCGGCGTCAAGGTCT	100	69	0R
chr1R	496.02	100039254|F|0--66:A>T	TGCAGAAGAGCTGGTATCTTACTGAAAGAAAAAGAAGCTGTGACGTGACATTCGGTTAGCTTAGCTAGC	100	69	0R
chr1R	496.02	100082717|F|0--38:T>C	TGCAGAAGAGCTGGTATCTTACTGAAAGAAAAAGAAGCTGTGACGTGACATTCGGTTAGCTTAGCTAGC	100	69	0R
chr1R	496.02	100082718|F|0--66:T>A	TGCAGAAGAGCTGGTATCTTACTGAAAGAAAAAGAAGCTGTGACGTGACATTCGGTTAGCTTAGCTTGC	98.551	69	0R
chr1R	496.84	100126624|F|0--9:G>A	TGCAGGGACGGCTCGTCGGAGTGCAGCGATGAAGGCGTCTCCGGTCTCATCTCCGGCAACCTCGTGGAG	100	69	0R
chr1R	496.841	100029823|F|0--9:A>G	TGCAGTCAGAAACTTCACCTTCTGAAACAGCTCTGGAGGTTACTTCTTCCTCAATGAAATCCTCTTCGC	100	69	0R
chr1R	497.047	100032231|F|0--68:C>G	TGCAGAAACGGACGAAACAACTTGGCAAATGCCAACAAATTAGACGAGTCAGCGATCTCGCTTACCATC	100	69	1R	114.22
chr1R	497.762	100075160|F|0--16:G>C	TGCAGGACCCCACGGGGGCCCTCGCCGACTGGAACGCCTCCGATGCCGACCCCTGCTCCTGGAACGGCG	100	69	1R	114.78
chr1R	499.434	100022514|F|0--44:G>A	TGCAGAATTGTATATACAAAACTAGAGGAAGGAGACAACATATAGAAGGGAAAGCATTAAGAACTAAGG	100	69	0R
chr1R	499.434	3363679|F|0--24:G>A	TGCAGAATTGTATATACAAAACTAGAGGAAGGAGACAACATATAGAAGGGAAAGCATTAAGAACTAAGG	100	69	0R
chr1R	500.403	3583451|F|0--5:C>G	TGCAGCGACGAGGAGGGGACGCCCATGGCGTCCTTGAGGAAGAAGTTGACGCCGAGCCAGGGGAAGAGC	100	69	0R
chr1R	500.611	3908637|F|0--34:A>G	TGCAGCAGCGCGGGGATCAAAACGGCCCGCACTGACTCGTCCCGCATGTGGAGGCACGAGACGGAGACG	100	69	0R
chr1R	500.785	3362884|F|0--11:A>C	TGCAGGACGAGAGGAAGAATCTGCCCGTGTACAAGTTCAAGGACGATCTGCTCAAGGCCATCGACAAGT	98.551	69	0R
chr1R	501.306	3742912|F|0--28:G>C	TGCAGGGTGTTCAGGGTGAGTTGTCCGCGGTTGAGCGTAAGCTCCAAACTCTGAAAATCGACATCCAAA	100	69	0R
chr1R	501.339	100150095|F|0--26:C>T	TGCAGGTAATCTGCAACCAATCGGAGCAACAACGGGCCGCATATCTTGGAAAATAGCGAGCCAGAGATG	100	69	0R
chr1R	501.339	100150096|F|0--55:G>A	TGCAGGTAATCTGCAACCAATCGGAGCAACAACGGGCCGCATATCTTGGAAAATAGCGAGCTAGAGATG	98.551	69	0R
chr1R	502.261	100039618|F|0--39:G>A	TGCAGCTCCACTCGGTCCTCTTACTTACATGAACCAGTCGAACTTTACTCACGACCAGGCGCCAGCCAC	100	69	0R
chr1R	502.532	3343110|F|0--66:G>C	TGCAGCATTTTAACTTTTAAGGAAACGATATTTCGTAGCTGGATGCACTGAGCTCCGCTGACACCCGAG	98.571	70	0R
chr1R	502.559	100016308|F|0--7:T>G	TGCAGCCTCTGTTGGGGGACAGTGCAGGCACTGGCAACAGATGAAGAAGCTGCTGCCGCTGGCATGTCG	100	69	0R
chr1R	502.969	100079762|F|0--63:A>G	TGCAGGATCGTCCCGGTGTTCTTAGACGCTAAGTAGTTCCCCAGTCGCAGAGAAAGCTCGCATATGTGT	100	69	0R
chr1R	503.836	100190756|F|0--48:A>G	TGCAGTGGGCCATGGCGGAGCTGATGAGGAACCCGAGGGTGATGCGCAAGGCGCAGGAGGAGGTCCGAG	100	67	0R
chr1R	504.533	100022202|F|0--28:T>C	TGCAGACAAGGTGCAAATAACGACATTTTTATATCTCTTAGGGCCATCAACATGGCTGTTCCGTGGAAG	100	69	1R	112.55
chr1R	506.448	5209906|F|0--63:A>C	TGCAGCAGGTCTACGCGTGGCACCTCGGCGGGGACAACCTTCCCCGCCTTCCCCCAGCCGCCGACCACC	100	69	0R
chr1R	506.892	100053820|F|0--19:G>A	TGCAGCTCCAGTGCACCCAGGCATCTGTGGACGGAAGAGTAAGTAGTAATGCATAAATAGCAGCGGTAA	100	69	1R	115.89
chr1R	506.927	100030994|F|0--16:T>A	TGCAGTAGCCACAGACTAGCAGGGCGATGCAGGCGACGATGATGTAGAGCTTCCCCTTCTGCTGCTGCG	98.551	69	1R	115.89
chr1R	506.927	3360570|F|0--34:G>C	TGCAGTAGCCACAGACTAGCAGGGCGATGCAGGCGACGATGATGTAGAGCTTCCCCTTCTGCTGCTGCG	98.551	69	1R	115.89
chr1R	507.893	100001872|F|0--22:C>T	TGCAGCTATGTTCTTAGCTCCGCCACTCCATCCCCCTTTTACACTACAAACCCTACGCAAAATACTACC	98.551	69	1R	115.89
chr1R	508.663	3906660|F|0--6:A>G	TGCAGGAAGCGGGGCGAAGCTGAGATAGGAGTCGGGGATGAGGCGGCGGTCGAACCCAGGAAGCGGGAC	100	69	0R
chr1R	509.865	5046934|F|0--28:C>A	TGCAGTTGAAGTCGCGGTGGATGACGGCCGGGGAGGTGTGCTCGTGGAGGAACTCCAGCGCGCGGGCGC	100	69	0R
chr1R	509.866	3737528|F|0--50:C>G	TGCAGGGGCCTCGCCGGCGTGGAGGAGCAGGACATGGAGGGGCTCTTCTTCACGATGGGGATGAGCGAC	100	69	0R
chr1R	510.37	100029598|F|0--40:A>G	TGCAGCCAAATCAAACGCGAGAGATTAGGAGGCCGAATCGAACAGCGCAGGAGGACGCGCAGATCTGAA	98.551	69	1R	117.59
chr1R	510.727	3344956|F|0--40:C>T	TGCAGCTCAAGGACGGGCCAGAATGGGATAAAATAGCTCACATCCCGATCAAACGGATCCATTGACCAG	100	69	0R
chr1R	511.107	3907414|F|0--20:T>C	TGCAGCTGGTCCTTGGTAGTTGCATTCAGTGTTCTCACACTATGCTAGTGGAATTGTGCTGGATGTGAG	98.551	69	0R
chr1R	511.278	100015919|F|0--22:C>T	TGCAGAACCTTTTTCAAGAAAGCGCTCGCATTATATCCTCTTGGTCTGTAGAAGTAACATTAGACTCAT	98.551	69	0R
chr1R	512.069	100135676|F|0--65:C>T	TGCAGCAAGCGCGGCCGCGGGCCCATCATGGCCAGGACCGTCGCGGCCACCATGTTCGTCGTGCTCGGC	100	69	1R	118.14
chr1R	512.658	100027861|F|0--64:T>C	TGCAGCTCTTGCCGCACCTCTTCAGCCCTGTTAAGTTCACACGCAGATATACAAACTTACTTAGTTAAC	98.551	69	0R
chr1R	512.658	3363596|F|0--37:C>G	TGCAGCTCTTGCCGCACCTCTTCAGCCCTGTTAAGTTCACACGCAGATATACAAACTTACTTAGTTAAC	98.551	69	0R
chr1R	512.658	100180747|F|0--35:C>G	TGCAGCTGCATGCAGAGCTGGATCCTCTCCATCGCCGACGCGCTCAGCGGCTGCTGCTCGCCGTCGTTG	100	69	0R
chr1R	516.224	100020721|F|0--37:C>G	TGCAGCTGAGCAAAGCAGTGTTCGTGATCCTGCGCTGCTGCCTTTGTGACCTCTGCGTGAGCTTTTTTC	100	69	0R
chr1R	516.224	3595402|F|0--37:G>C	TGCAGCTGAGCAAAGCAGTGTTCGTGATCCTGCGCTGGTGCCTTTGTGACCTCTGCGTGAGCTTTTTTC	98.551	69	0R
chr1R	516.504	100045871|F|0--45:C>G	TGCAGGAGAAGACCGCCAAGAAGGCGGCGCAGGCCACGCAGGGGGCCGACGACGCCAAGAAGAAGAACG	100	69	1R	118.7
chr1R	519.72	100012381|F|0--7:T>C	TGCAGGCTTTTTCTTTGATCTGGTTCCCAAAACACATGATCGATGGTGCCATCTGATGCCACGAGGGCC	98.551	69	1R	118.7
chr1R	521.021	100001076|F|0--8:C>G	TGCAGCAGCGTGTGGTACTTGATGGTCCACCAGAGCGCCATGTCCGTGATGAGGAACTGCACCTCGCCG	100	69	1R	118.7
chr1R	521.884	100006392|F|0--59:A>G	TGCAGCCATGACAATCAGGCATCATCATCACCTCCTCTCCCTGCTATGATGATCAGTCAAGGCTGGCGG	100	69	0R
chr1R	521.999	3362158|F|0--34:C>A	TGCAGCCACTCCCCTCCGCTTGCGCTCTGCACCACCATGACGAGCACCGTTCCCAGGTAGTTCCCCAGC	100	69	0R
chr1R	522.128	100022801|F|0--17:T>C	TGCAGCTGCACCTGCCGTTGGTCGAGGCCTCCAACGTGCTCACAAACTACCACGGCACCTCCAACCTCA	100	69	0R
chr1R	522.841	100009200|F|0--65:A>G	TGCAGCTCCCGCTTCTCCTTGCCATAGTCCTTCTTGTTCGTGAAGGCGATCTGTTTGTTCACCACACAT	100	69	1R	119.26
chr1R	523.141	100013610|F|0--54:T>A	TGCAGATGCTGTGCCCACCAATAACTACTATCCTAGAGCAGACAGAATATAAATTCAGAAAGCTGCTTC	100	69	1R	119.26
chr1R	524.855	100018673|F|0--62:C>G	TGCAGGGTAACTCCAATGGCGAGTCGTCAAAACGGACGCCCTGAAATGTCCCAGACACGTCCCATGCCT	100	69	1R	119.26
chr1R	524.855	100041558|F|0--18:G>A	TGCAGATTTCATACGCACGCCGATCTGGGCGCTGGCGGGCACGCAGAGCTCAGAGCCGAGCATCGCCGC	100	69	0R
chr1R	526.677	100008678|F|0--15:C>T	TGCAGTCAAAAGAGTCGATAGGCAGTGGTTGAGCATAGCATTCTGTACTAACCTCAATTCGGGCATATA	100	69	1R	119.26
chr1R	530.873	100001767|F|0--38:C>A	TGCAGAAGAGTACTAGATCTCATCAAACCCAGCATTTTCTTCAAGACATACTTCCTGGAGGAACACCAC	100	69	0R
chr1R	530.927	3355931|F|0--26:T>C	TGCAGCCTCCCCTTCCCGAAGGAAGGTCGTCTCGTCCCACCGTTGTGTCACCGAAGAGAACACATGCAT	98.551	69	0R
chr1R	531.281	100034419|F|0--66:A>G	TGCAGTTACTGCTACAAAGCTGTGTTTCATAACCCAAAATTTTGTACAGTGAACGAAAAGGAAAACACA	100	69	0R
chr1R	531.282	100017797|F|0--37:C>A	TGCAGTTGCAATTCCACCAAAATGAGAAGACTTAGCACTCCATTTAAATGTACTACAAATGTTACAGTT	100	69	0R
chr1R	532.447	100067892|F|0--11:T>C	TGCAGCCGCCCTCCACCCCTCGTCCCCACAAGCATCCGTTATCCACTGACACAAGGGCCCCATCAACCA	98.551	69	0R
chr1R	533.632	100019097|F|0--6:T>G	TGCAGGTGCACGGATTTGCCATCTCTTCCTCAACAGGGAGCTTTGCTTCTGCCGTGAGGCCGCCCCGTT	100	69	0R
chr1R	533.632	3743215|F|0--6:C>T	TGCAGCCCGCTGGCCGGCTTCGTGCCGAGATGGGGCGACGTGAACCCATGGCGCCACGCCGTGGTCCTC	100	69	0R
chr1R	534.164	100066277|F|0--62:C>T	TGCAGACAAGCAGTGGAAAGCGGTAGACTTTCCGCACCAAAGCTGGCAATGGCATGGCCGTTCGGTCAG	98.551	69	1R	119.81
chr1R	535.707	100114431|F|0--36:C>G	TGCAGTTACATTAGAGTCCCAAAAACAATAAAGAAACGGAAAAATAACTCTACACTAGTCATACGCTCC	100	69	0R
chr1R	536.399	100023118|F|0--7:T>C	TGCAGAATTTATGCCATGATGGAGCACACATGCCATGGATCCCCAAGGCGCTGGCCTGCAATCCCATCG	98.551	69	0R
chr1R	536.471	3348082|F|0--8:G>A	TGCAGCCAGGTCGTTGGTGCATTTCTGGATCTGAACAGTAAGGTTTTCGTGGTCAGTAGCTCGGTATGC	100	69	1R	119.81
chr1R	537.275	3744594|F|0--9:A>G	TGCAGATGAAAGTGTTATTGCTTTGGCAAGTGGGTGCCCGCACCTGCGATCGTTGGGCCTGTACTACTG	98.551	69	0R
chr1R	538.313	3357089|F|0--23:A>C	TGCAGGTCCTTCTCGGGGGTCGAAGTCTGCAACGACGCCCACCCCCAGTGCCCCAAGGGCTGCTCGGCC	100	69	0R
chr1R	538.627	100070984|F|0--11:C>T	TGCAGGTCCTTCTCGGGGGTCGACGTCTGCGACGACGCCCACCCCCAGTGCCCCAAGGGCTGCTCCGCC	100	69	0R
chr1R	539.285	3742380|F|0--15:C>A	TGCAGGAATTTGTCTCAAAAAAAAGCAGGATGCAGGAAAATGTTGGGGAGAGAGAGGAAGTAATAGGCC	98.571	70	0R
chr1R	539.726	100004528|F|0--56:C>A	TGCAGTTTGCTTGGTTTTCTTACTTTGAGGTCTTTGTTGTGCCCTTTCTGCTCCTCCTGCACTTCCCGA	100	68	1R	119.81
chr1R	539.728	100015813|F|0--47:A>T	TGCAGCATCTCCACCCAGATAAGACATCTTCCAAACCAGCAGAAAACAGTTTCTCCGCGGTAAAGCAGT	100	69	1R	119.81
chr1R	539.955	100060277|F|0--13:A>G	TGCAGCAGTCAGAACGCAGAGATTATTTACTGTGCGCACGCGAATACCTGGCTTTCCTAGCTGGAGTGG	100	69	0R
chr1R	540.311	100029863|F|0--30:C>G	TGCAGTAGCTGCATGACTACGTGCGTACGGCCGCGTTGCTGTCTCACCTGAACTGAATCAATCCCTGAT	98.551	69	0R
chr1R	540.311	5223742|F|0--24:G>T	TGCAGACACGAGCGCGACACGACGGGTACGTCCTCTTATCGCCACTGACACGGTGCACGTGAACCGAGA	100	66	0R
chr1R	540.329	5046720|F|0--55:G>A	TGCAGAGCCTCTGCGAGCCGGTGGAGAAGGTCCTCGCGAGGGTGACCGCCCCGATGGCCAGCCCTTCCC	100	69	0R
chr1R	540.704	100010536|F|0--67:G>T	TGCAGTTAGTACTGCCTATGTTGCTTGATGATATGGTGGTATTTTTATAGGGAACCCACTATAATCTGA	100	69	0R
chr1R	541.468	100006130|F|0--20:A>C	TGCAGCATAGCCTTAATCTCATCCACACCCTGAAAAACATGACAGGTTGCCATCTCTGCTTGACCTCCG	100	69	0R
chr1R	542.04	100113380|F|0--59:T>C	TGCAGCCCCATGAATCACGCCGCGTAAGCAAAACTGGCGGAGTAATGCCCATCCTTCTCTCAACTCCAC	100	69	0R
chr1R	542.149	100012335|F|0--10:A>G	TGCAGGGCACACTTTTGCTGTTTATGCAGAATGGATTTAGAAATAGTTTTGATTTTTGAACAAGGATTC	100	69	1R	122.06
chr1R	542.15	100011449|F|0--29:G>C	TGCAGCACAGCAGCAGGCCCCTTGTTGCGGTCAAAGGAATTGCAACAGGGGCCAAATCGCAAATCTGAA	100	69	0R
chr1R	542.478	3584679|F|0--14:A>G	TGCAGCCAGGCCGAAGTGGCGAGCAGCACCGTGGACGACGACGAGGCGTGCGAGCTGGTGAGGGGCACG	100	69	0R
chr1R	542.488	100109254|F|0--21:C>A	TGCAGGTGAGCAGTTCCCGTGCGCTGATCCGCACCGAGAGAACCACCGGAAAGGTCGTGCCCACTCTTT	100	69	0R
chr1R	543.267	100007384|F|0--10:C>G	TGCAGGGCCTCGGGATGCTGGCGCTCTCGTCCATGTTCTCGTCACCTCACAGCGAACAATGCAAACTCG	98.551	69	0R
chr1R	543.267	3594068|F|0--7:C>G	TGCAGGGCCTCGGGATGCTGGCGCTCTCGTCCATGTTCTCGTCACCTCACAGCGAACAATGCAAACTCG	98.551	69	0R
chr1R	543.357	100148853|F|0--16:C>T	TGCAGCGCATCGGCGTCGGGATGGTGCTCTCGCTCGTGTCGATGGTGGTCGCGGCGCTCGTGGAGACGC	100	69	0R
chr1R	543.357	100014957|F|0--29:C>G	TGCAGAGCTTCATCAGCATCACCATCGTGCTCTTCATGCCCATCTACGACCGCGCCATCGTGCCGCTGG	98.551	69	1R	122.61
chr1R	543.358	100070564|F|0--43:G>C	TGCAGATGGCCGCGTTCTACACCTCCCTCTACCTGGTGGCCCTGGCGCAGGGCGGGCACAAGCCGTGCG	98.551	69	0R
chr1R	543.944	100064745|F|0--60:C>A	TGCAGCGATGGCAAGGGAAGCCAGAGCAGTGTGCACGCATCAACCACCATCTTATTTACGCACGGAGTA	100	69	0R
chr1R	543.954	100025241|F|0--50:A>G	TGCAGATGAGGGCTCGCCAGCCACGGCGTCGCCAGGTACCTACGCGGACAAATTTCGCAATATTACAGG	100	69	0R
chr1R	544.361	100025108|F|0--42:A>T	TGCAGATTTGGGCCTTGAATGTAGTACTGAAGACTGTTACAAAATGGCGAAGAGTTACTCAATTTTTTA	100	69	1R	123.17
chr1R	545.426	3599542|F|0--58:T>C	TGCAGTGAACTCACATAGATCATGAACCCCACTGCCACCGCAGGAATCGCGTATCCTGTGTTGTAGCCG	100	69	0R
chr1R	545.635	100136466|F|0--58:T>G	TGCAGCCGTTCGGCTCGATATCCAAGCTCGTCATGCTGCGTGGCAAGAATCAGGTGGGTTCTTTTCTTC	100	69	0R
chr1R	546.474	100066634|F|0--44:T>C	TGCAGCTGCTCGTGCCACCTCGGAACCTTGTTGCGGAGCACCAGTGGCCTCTCCTTGTGCTCTCCGTCT	100	69	1R	124.29
chr1R	546.643	100041621|F|0--7:G>A	TGCAGCGGGACTCGTCATGGAGTCCTAGATTGAGATTGGAACCGCTGATGTATGTGCGCATGATCGGCG	98.551	69	0R
chr1R	546.96	100006933|F|0--30:G>A	TGCAGACGCAAGGGCATAGTTAGCTCCTCAGTTAAATATATGGATCCGCCATGACCAAGGTTGCAAGGT	100	69	1R	124.84
chr1R	546.961	100081849|F|0--64:G>C	TGCAGAGTGCCCTGAACCACACAAAGTCGATCGATCGTTAAGTTCGGGAATTGCGAATTGATTTGTCAT	100	69	1R	124.84
chr1R	547.356	100009327|F|0--21:T>C	TGCAGGTATTGTGCTTGACTCTGGTGATGGTGTGAGCCACACTGTTCCAATCTACGAGGGATACACGCT	98.551	69	0R
chr1R	548.041	3602946|F|0--50:C>T	TGCAGTGCCATTTCCATAGTGCACATCTATGTCAACAACGGCAACCTTTGCGCGGCCAGAATCCAGAGC	100	69	1R	124.84
chr1R	548.041	100110042|F|0--6:A>G	TGCAGTACCATTTCCATAGTGCACATCTATGTCAACAACGGCAACCTTTGCGCGGCCAGAATCCAGAGC	98.551	69	0R
chr1R	548.308	100018971|F|0--41:C>T	TGCAGCTACTCCGTAGATATTGTCTTAGGCTCTTAGCACGTCAGAAATATGGGCAATGTGGTAAATTGA	98.551	69	0R
chr1R	549.23	100039164|F|0--5:G>A	TGCAGGGGCTTTGAGAGAAAGTGAAGAAGGCCCCACCTTCTATTGCTGAGTATGACTAGGCTGAATTAA	100	69	0R
chr1R	551.135	100026389|F|0--33:G>C	TGCAGAGCGCCCTGAATCTCCGTCATGTACTTGGTGTCTTCGTCTAACCATCGGGCGTACTCCATGTCG	100	69	0R
chr1R	551.881	100053903|F|0--29:C>G	TGCAGGTCAGCGACGGAGGAGGAGGCGGCCAGGATCGTTTTGGTTCTTGAGGTTCTGGTAAAGATCGTT	98.551	69	0R
chr1R	551.881	3599572|F|0--29:G>C	TGCAGGTCAGCGACGGAGGAGGAGGCGGCGAGGATCGTTTTGGTTCTTGAGGTTCTGGTAAAGATCGTT	100	69	0R
chr1R	551.891	3904441|F|0--30:A>T	TGCAGTTTGGGAAGTATGTTGTGGTTCCATAGGCTGCTTCATAGGACCTTGGGGTGTGATGTTCTGACC	98.551	69	0R
chr1R	553.133	100074710|F|0--67:C>A	TGCAGGGTGCACGCAGGTGCCCATAAGTATCGTGGTGTTCCATAGGAGGGGATCCAGGCCCGTGCCGCC	100	67	1R	124.84
chr1R	553.94	4093083|F|0--32:C>A	TGCAGCACCAGCCCGGAGGCCATCCCCAGCTGCGAGAAGGAGTAGGGCAGCGTCAGCAGCACCTGCGCC	100	69	0R
chr1R	553.941	100052098|F|0--30:A>G	TGCAGAGTTGGCGGCAGAGTGGGTGCGCGCACAGCAGTTACTTCGCCGCGCGTTTCTCGGGGCCTCGCA	98.551	69	0R
chr1R	555.029	100075095|F|0--34:T>G	TGCAGGTACTGCACCTTCTCGATTTGCTAACTCCTTTTGGGCTCTGATCTGCGAGTGGGAGAAGTAACC	100	69	1R	124.84
chr1R	555.029	3596193|F|0--34:G>T	TGCAGGTACTGCACCTTCTCGATTTGCTAACTCCGTTTGGGCTCTGATCTGCGAGTGGGAGAAGTAACC	98.551	69	0R
chr1R	555.411	100044111|F|0--25:A>G	TGCAGGAACTCAAACCCAAGGCGGCAGTCATGATAACTGCTGCAACCGATGGTGTTTGGGCAAATCTTA	100	69	0R
chr1R	555.412	100037426|F|0--49:A>T	TGCAGCAAACAACATTGTTGGATGAGTGAGCAATGGTTGTCACGTTGAAAGGAACTGATGCTGGTGTTG	100	69	0R
chr1R	555.653	100035894|F|0--31:C>T	TGCAGTAGGAAGGGTGGTGGATAGGCAAGTGCAAGCTGCAAGATCTGTTCGAGACCAGTTGTGATGTCA	100	69	0R
chr1R	556.571	3364118|F|0--22:A>G	TGCAGCGGAGTACTACCAAAAAAATTCGCCTGCCTCCTCGGAGCTGCCCTGCGATTGCGCGGGGGCAGC	100	69	0R
chr1R	556.633	100027372|F|0--13:G>T	TGCAGTGCAGGTAGATCGATACCAGCAGGAGATCTTCACGTCGGTTACGATGTGACAAAAAAACATCTG	100	69	1R	124.84
chr1R	556.881	100008470|F|0--48:A>C	TGCAGGCTACCTGGTTCATTTCATCTTTGGAGTGACAGGGAAGTAACCACTGTAGGGCTTTGACCTTCA	98.551	69	1R	124.84
chr1R	557.336	100042049|F|0--64:G>C	TGCAGATGCAACCAAATCAATCACCCCAGCTCAACAACAACGCCAACCCTAGCGAAACGAGATAGAGGA	100	69	1R	131.91
chr1R	557.336	100123911|F|0--5:A>G	TGCAGATGCAACCAAATCAATCACCCCAGCTCAACAACAACGCCAACCCTAGCGAAACGAGATAGAGGA	100	69	1R	131.91
chr1R	557.414	100019942|F|0--36:T>C	TGCAGTTAAATGTTTAAAAATACACGCAAAATAGGTTGGATAAGAAGTGTGGATGGAAATATTATGAGC	98.551	69	0R
chr1R	557.713	5040382|F|0--16:G>A	TGCAGATAAGAGAGAGGGGCGAGCGAGCGAGACAGGGAGAGGCGGCGCGCCGAGCCAGCCAGCCAGCCC	100	69	0R
chr1R	557.859	4096091|F|0--10:C>T	TGCAGATACACACAGAATTATAAATTCAGATTAGGCTCATGCTTACAACAAGACTTTGGTCTTAAAATT	100	69	0R
chr1R	557.914	100025081|F|0--11:A>G	TGCAGCCCGATACGTCATCGTTTGAACAGGAGCGCCTGTTTCTTCCACTTGACTGGTCATCGCCGATGA	98.551	69	0R
chr1R	558.14	3739984|F|0--68:G>A	TGCAGCTGCACACCACGCGGTCGTGGGACTTCCTCGACACGCAGTCCGGCCTCAGCACCGACCGCCTCG	100	69	0R
chr1R	558.14	3582858|F|0--61:G>A	TGCAGAGCGCGGTCCCGAAAGACGGACACCACCATCTCGTGGTCTGGTGGTGCAACAACCAGACAAAAC	100	69	0R
chr1R	558.185	3747070|F|0--17:T>A	TGCAGTTTCCTCTCATATGTAATGTATAATCAATAACTGAACCAAGATACGCAGTCTTTAAATTTCTAT	100	69	0R
chr1R	558.457	100031583|F|0--32:C>T	TGCAGTTCAGCCGTGTCCGTCGGTGTGTCACACGCGTTTCCCGATAAAAGGCAATTATTCTATCCACAC	100	69	0R
chr1R	558.772	100017746|F|0--40:C>T	TGCAGAGCTATAGATAAAGTTGTGAACTGGTAGAGTCCTTCATCATACCCTACGGCCTACGCTACACAC	98.551	69	1R	132.47
chr1R	558.772	100017746|F|0--57:T>A	TGCAGAGCTATAGATAAAGTTGTGAACTGGTAGAGTCCTTCATCATACCCTACGGCCTACGCTACACAC	98.551	69	1R	132.47
chr1R	559.717	5227951|F|0--41:T>G	TGCAGGAGTGCAAGTCCGAGTGATCCGCTCCACTTAGCAGCTATCACCAGTTTTTCGGCGCGCCTCTCC	100	69	0R
chr1R	559.717	100022974|F|0--66:T>G	TGCAGGAGTGCAAGTCCGAGTGATCCGCTCCACTTAGCAGCGATCACCAGTTTTTCGGCGCGCCTCTCC	98.551	69	0R
chr1R	559.717	3597279|F|0--53:C>T	TGCAGGCCGCTTTGAAAGGCAGGTGGATAAAAAGGGTGTGGGCACGTACGCCTCGCCGTCGTCGCGGCG	98.551	69	0R
chr1R	559.912	100035750|F|0--51:C>G	TGCAGCCAGCCAAATTCGCGCGCCGCACGGTCAACGAGGCCGCCCTGACTCCACGACCTTACGAAAGCA	100	69	1R	132.47
chr1R	560.143	100025222|F|0--23:T>C	TGCAGTTACAAGCATCGTTTGTTTGGCCCTCAAAAATATATATGTCTTTTTCTTGTAGATCACAATAAA	100	69	1R	132.47
chr1R	561.054	3908770|F|0--30:G>T	TGCAGCTCAATCGCATGCAACGTGGTTGTGGTAGGCGATCCGGAGTTCGTGGAGCAGTCGAACGAATCG	98.551	69	0R
chr1R	561.058	3363856|F|0--57:C>T	TGCAGAGCACGGGTGTAGTATGTACTATGAATTATGATGGTCGTGTCAGGGCGTAGACGAGGCGTGCAC	98.551	69	0R
chr1R	561.061	100040659|F|0--8:G>A	TGCAGACTGTTTGCAGTACAATCTTGGGTACTCCCTGGCAAATCTCTAGCCATTATTTAGACTAGACTG	100	69	0R
chr1R	562.21	100003644|F|0--29:A>G	TGCAGTGCTTCCTTGCCTCCATCATGGTGACCATAGCAGACAATGATGGCATTCCAGGATACAGAGTTC	100	69	0R
chr1R	562.435	100034867|F|0--42:C>T	TGCAGCAAGATGCCGCTGGCCCCATAAATGCTGCACCTGTAGCAGTTCATGATGGCCTCAAAGAACACC	100	69	0R
chr1R	562.766	3744932|F|0--13:C>A	TGCAGAAGGTCCCCATTGCTGAAGAGCGGGCCCTGCAACGCTGTATGGAGCCCGCAAAGCTAGCGCTCC	100	69	0R
chr1R	562.766	3744932|F|0--40:C>T	TGCAGAAGGTCCCCATTGCTGAAGAGCGGGCCCTGCAACGCTGTATGGAGCCCGCAAAGCTAGCGCTCC	100	69	0R
chr1R	562.767	100006246|F|0--37:T>A	TGCAGTAAGATGTCATATGATTGGCGTAATGACTCGATGGTGTGTTACTTGGTCTGTGAGGCCCATATG	98.551	69	1R	133.02
chr1R	562.767	3743243|F|0--37:A>T	TGCAGTAAGATGTCATATGATTGGCGTAATGACTCGAAGGTGTGTTACTTGGTCTGTGAGGCCCATATG	100	69	0R
chr1R	562.767	100011996|F|0--36:A>G	TGCAGGATTCGATCTTAAGGAAAAAGAAATGGGGTCACCAGTGTAGACAAAAAGAATGTAAAAAAAATA	100	69	0R
chr1R	562.768	100040091|F|0--67:G>C	TGCAGTAAGATGTCAGATGATTGGCGTAATGACTCGATGGTGTGCTCTATGGTGTGCTGCATTGAGCGA	100	69	1R	133.02
chr1R	562.768	3345150|F|0--66:T>A	TGCAGGATTCGACCTTAAGGAAAAAGAAATGGGATCGCCAATGTAGCCAAACAGAATGTAAAAAAATGG	100	69	0R
chr1R	562.769	3359968|F|0--19:T>C	TGCAGGTTCGAGGTCTGCATGGGTCTCTGCCATGCCGTCGTCGTGCTCCCTACTGCCAATCCGCCCTCC	100	69	0R
chr1R	562.776	100039127|F|0--40:T>A	TGCAGCAGGAATCAATCTATTCGATAATATTTTTCTATTATGCAAAGAACGAAGCAAGAGAACTACTTA	100	69	0R
chr1R	564.89	100021369|F|0--33:A>G	TGCAGTATGAAACAAGCAGGTAGTTCATCACTCAGAAACAAACAGCCCCTATTTTGGTCCACATCCTGA	100	69	1R	133.02
chr1R	565.321	100080464|F|0--16:G>C	TGCAGCCGACCCTGGCGACCGAGTACGCGAGCCAGGCCGGCCGCTTCACCCTCAACATCACCCGCTCCA	98.551	69	0R
chr1R	565.321	100080464|F|0--28:G>C	TGCAGCCGACCCTGGCGACCGAGTACGCGAGCCAGGCCGGCCGCTTCACCCTCAACATCACCCGCTCCA	98.551	69	0R
chr1R	565.977	100109584|F|0--22:T>C	TGCAGTACCTTAATGAATGCGATGTTGTTCTGAATGATTCAGTGCTTTGATTATATAATATCAGTGGAA	98.551	69	0R
chr1R	566.396	100025948|F|0--19:T>C	TGCAGGACCAAGGCAGCGATACGGTGGAGGCCAACGTCGAGCTCGGCCTCGCCATTGACTCCCGCGAGT	100	69	0R
chr1R	566.397	3907660|F|0--62:C>T	TGCAGCTGATACACCAGTGGATATTCCCACTCTGGCGTCCTGTATCGATAGGAAAAACAATGCTTCAAG	98.551	69	0R
chr1R	566.397	100012656|F|0--15:A>G	TGCAGACAGGGCAAAAACCATCCTTGCTCTGGCCTCCCCTGACTCCAAGCCCAGTGATCTCAGAAGGCC	100	69	1R	134.7
chr1R	566.397	100012656|F|0--18:C>T	TGCAGACAGGGCAAAAACCATCCTTGCTCTGGCCTCCCCTGACTCCAAGCCCAGTGATCTCAGAAGGCC	100	69	1R	134.7
chr1R	566.397	3582636|F|0--18:T>C	TGCAGACAGGGCAAAAACTATCCTTGCTCTGGCCTCCCCTGACTCCAAGCCCAGTGATCTCAGAAGGCC	98.551	69	0R
chr1R	566.405	5227977|F|0--8:C>T	TGCAGCCACTTCTGGTATCCTAGGACAAACCCTCTCTGTTCCAACTTCCAACACGAAGCGTCTCGGCTG	100	69	0R
chr1R	566.701	100041881|F|0--26:C>G	TGCAGGCGGCCCTTGTAGCTGCGGTCCGAGATTTGATCCCAAAACTCGAGCAGCTCCGCCTTGTCGATG	98.551	69	1R	133.58
chr1R	566.701	3599736|F|0--26:G>C	TGCAGGCGGCCCTTGTAGCTGCGGTCGGAGATTTGATCCCAAAACTCGAGCAGCTCCGCCTTGTCGATG	100	69	0R
chr1R	566.702	3594124|F|0--13:G>A	TGCAGATAATTACGTTGAGCGCGTCGGCGAACCAGCTAAAGGTGGGCGAACAGGACTCCGAGGAGTATG	98.551	69	0R
chr1R	566.702	100022037|F|0--14:G>T	TGCAGACCAGATCAGAATAACCCTCATTGATGTGCAATGTGCAATGGCAGTCTTTTTGACTGAGTATAT	98.551	69	1R	134.7
chr1R	566.702	100022037|F|0--60:T>C	TGCAGACCAGATCAGAATAACCCTCATTGATGTGCAATGTGCAATGGCAGTCTTTTTGACTGAGTATAT	98.551	69	1R	134.7
chr1R	566.702	3360654|F|0--60:C>T	TGCAGACCAGATCAGAATAACCCTCATTGATGTGCAATGTGCAATGGCAGTCTTTTTGACCGAGTATAT	100	69	0R
chr1R	566.775	100022657|F|0--5:C>A	TGCAGCCCCGAAAACTTAAACATTGAATAAAGCTCTCAAAGGACAAGATACAGTAATCACCTCAGACGA	98.551	69	1R	133.58
chr1R	566.778	100010788|F|0--65:G>T	TGCAGGCCAGTTAAGCTATCATATTAATTCAATCAGCAGCGCAACAGCCATCAATTCGATGCGTGGAAG	100	69	1R	134.7
chr1R	566.803	100012621|F|0--56:C>G	TGCAGGCGGCTCTTGAAGCTGGGGTCTGAAATTTGATCCCAGAACTCACGCAGCTCCGCCTTGTCGATG	100	69	0R
chr1R	568.476	3742245|F|0--17:G>A	TGCAGTCCAGCTAACTAGCAAAACAAAATTTAGAGGATAGGACAAGTCGCTAATTCCTGAACTGATTCA	100	69	0R
chr1R	568.476	3742245|F|0--53:T>G	TGCAGTCCAGCTAACTAGCAAAACAAAATTTAGAGGATAGGACAAGTCGCTAATTCCTGAACTGATTCA	100	69	0R
chr1R	568.478	5223914|F|0--14:G>A	TGCAGGGGCATGTCGCACGGCAGGACGATGTCGACCTCGACGAAGTAGTGGGAGCCGAAGGTGTACGCC	98.551	69	0R
chr1R	568.478	3364902|F|0--22:G>A	TGCAGGAGAAGCTGGAGAGCCTGCCCGAGATCGAGCGCGCCTTCGTCCACCTCGACTACGAGTTCACCC	100	69	0R
chr1R	568.972	3584302|F|0--7:G>A	TGCAGCAGCACGACCCCGAAGCTGTACACGTCGGACTTCATGCTGACCTGGCCGCCGCGGTCGTACTCC	100	69	0R
chr1R	569.252	100043894|F|0--55:G>C	TGCAGATGCATTACCAGGTAGCCCCTGCAAGCCGTCTGAATCCTGACGGCGGCGAGCTCCTCCTTTGAC	98.529	68	0R
chr1R	569.419	100047166|F|0--22:C>T	TGCAGGCTAGAAACAGCGGCATCTATAAGCAGTACACGAAAGTGGCCGGAGCCTCCTTACCGGCTTCGG	98.551	69	0R
chr1R	570.725	3352539|F|0--40:G>C	TGCAGGTTGTGCACATCGACATGCACCAACAGTGGATCTCGCGAATGGTCACCCAGGCGGCTCCTGTCA	100	69	0R
chr1R	570.725	3592735|F|0--31:G>A	TGCAGGGGTAGGACAGGGGCCGTGCCGAACAGGGCTCGGGCATGACAAAAGTAATAGGTGAGGCGCGCG	100	69	0R
chr1R	570.783	100023521|F|0--11:C>G	TGCAGAAACCACAGACTTGGTCCATCTGAAGGGTACTCGTCCAGTGGCCGGTCTCCAGCAATCAGCTCC	100	69	0R
chr1R	570.783	100136660|F|0--42:A>G	TGCAGAAACCATAGACTTGGTCCATCTGAAGGGTACTCGTCCAGTGGCCGGTCTCCAGCAATCAGCTCC	98.551	69	0R
chr1R	570.783	100023521|F|0--11:C>T	TGCAGAAACCACAGACTTGGTCCATCTGAAGGGTACTCGTCCAGTGGCCGGTCTCCAGCAATCAGCTCC	100	69	0R
chr1R	570.783	100034284|F|0--60:T>C	TGCAGTTGATCATGCAATGATGAACAGAACACAGCCTGTGTTTGCCAACGGATTCCTGCATTGGTTGAT	100	69	0R
chr1R	571.62	100027904|F|0--51:A>C	TGCAGCACGTCCGAGAAGCTGAGCTTGTCCAAGGACACCTGGCCGTGCGGCACACCCTGAGGCAGCGGC	100	69	1R	135.27
chr1R	571.908	3351093|F|0--36:G>C	TGCAGGTCGCCGGTGCTAAGGACACGCCGCATGGTAGCGGAGCTGCTGAATTCAAAGAAGTCACCGAGA	100	66	0R
chr1R	573.633	100026097|F|0--48:T>A	TGCAGTTTGCAACAGTTTTCCATCATTTATGTAATTGCATACCTCATCTACTAGATTATCTGTGTGTGC	100	69	0R
chr1R	573.641	100025086|F|0--53:G>A	TGCAGATGGAATTTGGCTGGATTCCAGCCACGTTGGGAGCACACATGGTAGTAGGGGATGATCTGGTAC	98.551	69	0R
chr1R	573.641	3363023|F|0--53:A>G	TGCAGATGGAATTTGGCTGGATTCCAGCCACGTTGGGAGCACACATGGTAGTAAGGGATGATCTGGTAC	100	69	0R
chr1R	574.283	100035415|F|0--21:T>G	TGCAGCCGTAGAGAGGGAGGTTGGTATATTTTTTCAGACCATGTGTTGAACACTTTGACGTGAGGCTGG	100	69	0R
chr1R	574.948	3346695|F|0--16:A>G	TGCAGGATGTGTGGACAGACGTGAACAGGCCAGAAGATTGGACCCTGAGAGATGCCAGCATTGTGCCGC	100	69	0R
chr1R	574.948	3358155|F|0--44:T>C	TGCAGCACGGGCGGCCTCGACTCACACGAGGCAGTGATGTCCGATGTGCAGAGCTCCAAATCGTTGGGT	100	69	0R
chr1R	574.968	5036407|F|0--12:G>A	TGCAGCTCGGCGGCGGCGAACCTGTCAGGCGGCCCGTGGCCGCGATCGGCCTGGGTGAGGAGGCCCATG	98.551	69	0R
chr1R	574.968	3363682|F|0--32:G>A	TGCAGAAGGGATCCTGCTCGATCCAAGCCACGGAGGAAGAACACATGGTACAGAGAAGTCACTTTCATA	98.551	69	0R
chr1R	575.297	3364851|F|0--27:A>G	TGCAGTGGTGGAAGTTGATGCAGCCGCAGCTGATGGCAGCCGCAAATGCACCGATCGCAGTAAATCTCG	100	69	0R
chr1R	575.488	100069922|F|0--20:G>T	TGCAGCGCAGCCCACGAACTGATTTCCGCATTCGGTATGGTCGTACAGGGTACAGCCTGCGACGTTTTG	100	69	1R	135.83
chr1R	575.703	100055296|F|0--48:G>A	TGCAGCACAAAGCACCGAGGCAGACCAGCTTCCCGTTCCTGACATCTCGAGGCTGCCAAGCACTGTTTC	98.551	69	1R	135.83
chr1R	575.909	100058053|F|0--15:T>G	TGCAGCAGCCAGTCCTCGAGCTCGCTCTTGGGGCAATCTGACATAGGTGGGATCGCCACCGAAGCCCCC	100	69	1R	135.83
chr1R	575.909	3732133|F|0--10:A>G	TGCAGCAGCCAGTCCTCGAGCTCGCTCTTGGGGCAATCTGACATAGGTGGGATCGCCACCGAAGCCCCC	100	69	1R	135.83
chr1R	575.924	100022825|F|0--33:C>T	TGCAGCGCCGTATAGGAGGTCCCAAGCAGACATCCTGTTTAGGATCACTGGGATTCGATCCTGCAACAT	98.551	69	0R
chr1R	575.924	3359813|F|0--33:T>C	TGCAGCGCCGTATAGGAGGTCCCAAGCAGACATTCTGTTTAGGATCACTGGGATTCGATCCTGCAACAT	100	69	0R
chr1R	576.319	3906210|F|0--51:C>T	TGCAGGTTTCAGTTATGATTTAACGTTGCCTTTGGGTTGTGCTTGACCCCCCTTTTTTTTGCTCTACCG	100	69	0R
chr1R	576.883	3580303|F|0--7:A>G	TGCAGGGAGGCGAGGAAGTGCCTAGCCGCCGAAGCCGTAGAGGGTGCGGCCCTGGCGCTTGAGGGCGTA	100	69	0R
chr1R	576.885	100158492|F|0--12:T>A	TGCAGTCACTATTGCGTCCAATTATCTTCTTGAGCTATAGTATTTCTCACAAACCATGATCTCTTACAA	100	69	0R
chr1R	577.209	3595120|F|0--14:C>G	TGCAGTCACTATAGCGTTCAATTATCTTCTTGAGCTATAGTATTTCTCACAAACCATGATCTCTTACAA	100	69	0R
chr1R	577.209	3595120|F|0--17:T>C	TGCAGTCACTATAGCGTTCAATTATCTTCTTGAGCTATAGTATTTCTCACAAACCATGATCTCTTACAA	100	69	0R
chr1R	577.382	100028072|F|0--14:G>C	TGCAGTCACTATAGGGTCCAATTATCTTCTTGAGCTATAGTATTTCCCACAAACCATGATCTCTTGCAA	98.551	69	0R
chr1R	577.625	3746322|F|0--13:A>G	TGCAGCTATATCAACTAACAAGTGTCCTCTGAAGCCCTAGAACTTCGCCATAGACCAACCGCCTTTTGC	98.551	69	0R
chr1R	578.67	100054457|F|0--45:G>A	TGCAGAGCTAGCAAGCATCACGCGGTTTGGAGTTCGACTCCCATCGCCTGCGCTTTTCTTTTTTCGATT	98.551	69	1R	135.83
chr1R	579.073	100015202|F|0--25:C>A	TGCAGTTGGGACGCATCTAGTCGAGCTACTCATAAACCCCCACGGTCAAACCGATCAATTCAGAAACCC	100	69	1R	135.83
chr1R	579.073	3745649|F|0--25:A>C	TGCAGTTGGGACGCATCTAGTCGAGATACTCATAAACCCCCACGGTCAAACCGATCAATTCAGAAACCC	98.551	69	0R
chr1R	579.079	3595926|F|0--32:C>T	TGCAGGAACGTGTTCCAGTCCCGCCGCTTCTGCGACTCGTACCTGCTCAGCTGCTGCTGCGGCGGCGGC	98.551	69	0R
chr1R	579.384	3596668|F|0--38:A>G	TGCAGCCTTCCGTTGCCCTGCACCCTAGGGTTCATGAAATCTTCGGCGAGGAGGTCGACGAGGGCCATG	100	69	0R
chr1R	579.389	100043599|F|0--28:A>G	TGCAGCCGCGCCCTGCTCTGCACCCTGGACTTGCTGAAGTCCTCGGCCAGGATGTCCACGAGCGCCATG	98.551	69	1R	135.83
chr1R	579.389	100106497|F|0--9:C>G	TGCAGCCGCCCCCTGCTCTGCACCCTGGGCTTGCTGAAGTCCTCGGCCAGGATGTCCACGAGCGCCATG	98.551	69	0R
chr1R	579.389	3363935|F|0--28:G>A	TGCAGCCGCGCCCTGCTCTGCACCCTGGGCTTGCTGAAGTCCTCGGCCAGGATGTCCACGAGCGCCATG	100	69	0R
chr1R	580.185	3738017|F|0--37:A>G	TGCAGAAATTGCGGATGTTTAATACCTACTTTGAGGAAATCTACGCAGTACAATCAGAATGGATGGTAG	98.551	69	0R
chr1R	580.185	3584000|F|0--24:C>T	TGCAGTGTGCAACACCCTTGGTTCCTCAATCAAAGGTATATTCATGGAGTTGGAAAATCTCATCCGCCG	100	69	0R
chr1R	580.186	100048344|F|0--35:C>G	TGCAGTGCCTGAGTGCGCACAGCAGCAATAAAGGCCAGGTCGCCGAAGGGGGCGAGACCGTCGAAGACA	100	69	0R
chr1R	580.186	3589947|F|0--35:G>C	TGCAGTGCCTGAGTGCGCACAGCAGCAATAAAGGCGAGGTCGCCGAAGGGGGCGAGACCGTCGAAGACA	98.551	69	0R
chr1R	580.29	100009554|F|0--25:G>C	TGCAGCAATGGGTTGATCTTGCTCGGTACACTGGAATACAGAAGATTCAGGAACAGCTTCCTTCTGATG	98.551	69	0R
chr1R	580.841	3744585|F|0--13:G>C	TGCAGTGCCATGGGGCCAACGACGCGTCGAGCGACGCGCTCTCCGGCACGCCCGAGAACTCGTCGGCGT	98.551	69	0R
chr1R	581.041	100012434|F|0--54:T>C	TGCAGCTTTTATTTTTACCCGCCCTTTAAGATCATGCAAAATATCAAATCGGCATAAGGAATAATTCAG	100	66	0R
chr1R	581.081	100075317|F|0--31:G>A	TGCAGACTCCGGTCTGCTTCCAAAACACCAAGTAACAGCGGCTAGCTTCTTGCCGTGTTGAGCAGCAAG	98.551	69	0R
chr1R	581.55	100023232|F|0--44:A>T	TGCAGACCATCAACGGCCCCAACTCCGACTTCCCCGTCTACTCGACGGAGCTCAAGAAGGTCAAGGGCA	100	69	1R	135.83
chr1R	582.239	100019950|F|0--23:C>T	TGCAGGCGCGCCACCAATCGGCACCCCCGCCCTCGATTGATCCGATGCCGATCGTGTTGATAGCATCGG	100	69	0R
chr1R	582.242	100095541|F|0--38:T>C	TGCAGGAGGCCGCTCCCCGCCGCCGTCCCGGCCATCACTCCCCCGCCGTCCTACCACGCGCGGACCGCC	98.551	69	1R	136.39
chr1R	582.537	4094573|F|0--38:C>G	TGCAGCCCGTGCGTGCCCGTGCACGTGTCCGTGCCGCCCGGCGTGCTGGTCACCACGGAGTACTACCCG	98.551	69	0R
chr1R	582.866	3579154|F|0--26:A>G	TGCAGCCAGGAGATCGAGATCTTGGAACGCGAGATCGGCGACCGCCTGGCCGAGCGGTGGACGTCGGCC	100	69	0R
chr1R	582.867	5207709|F|0--16:C>G	TGCAGCTCAACGCCGTCACGGCGCTGCTCAACCTCTCCATTCTGGACGCCAATAAGAAGCGCATCATGC	98.551	69	0R
chr1R	583.587	3364434|F|0--38:G>C	TGCAGGGTACGTACGCACGCACAGTAGAACGTCCCATAGTGGGAGTATCTTGTGAAATCGCATCACGGC	100	69	0R
chr1R	583.785	100017614|F|0--26:T>C	TGCAGCCAAATACTGCTCCTTGTTTATTACCACTAACTGGTAACCAAGTTGCAGTCTTGGTGATAACAA	100	69	1R	139.24
chr1R	584.001	3909555|F|0--60:C>T	TGCAGTCTTATGACAGAAGCATGGGGCGGCCGAGGGATGAGCGTGGTCTGCATGGGTGGCCGGCGAGGA	100	69	0R
chr1R	584.196	100036810|F|0--5:A>G	TGCAGATGTGGTCGCCGAAGTAGGTGATGACGTAGAGGGAGAGGTCGTCGTCCGACTGCTGGACCTGCC	100	69	0R
chr1R	584.217	5034746|F|0--61:T>C	TGCAGTCCGACAGAGAGCAGTACAGCTGCTCCTCCGACGCCGGGGCGGCGTCCTATGCTGCTGGTGCCT	98.551	69	0R
chr1R	584.779	100079301|F|0--32:T>A	TGCAGCTTTGACAGGACGGCGGCGGCCCGATCTCCGCCGAGCAGGAAATAGGGGTGCCGGAGCGCGGCG	100	69	0R
chr1R	587.446	100011993|F|0--62:G>A	TGCAGTGTAGCGAGTAAATGATCTGATGGAATAATGATATCAAAACTTTGTGACCCTTGCTAGTTCCCA	100	69	0R
chr1R	587.905	3893197|F|0--26:A>C	TGCAGCTCATGAGCGAGGCCCTAGAGAGCGCACGTGCACCAGCTCTCGAGGTGCGTCGTTTGATCCAAA	100	69	0R
chr1R	587.906	100078641|F|0--57:A>G	TGCAGCTCCAGCTCGATCTTTGCCTTTGCCCCTCGCACGGCTGGACCTGACAAGATCAGCCCGGCGTAC	100	69	0R
chr1R	587.906	3360838|F|0--32:G>A	TGCAGTTTACGAAATATCAACAGAGATTCCATGCTACCCGCCGATGCAGATGCAGGAATCCCCAACGGT	100	69	1R	139.79
chr1R	587.986	100016825|F|0--41:T>C	TGCAGCCCCTCCCTCGCTTCTTTATTTAGAAAAAAAAAACATAGAGCATCCTTTTTTTTATGAACTTCT	100	69	0R
chr1R	588.13	100034010|F|0--37:G>A	TGCAGCTCCCGTGCCACATCCTCTTCAGCTCCTGCGCGGCCATGCTGGCCTTTCTCGCCTACTTCCCCA	100	69	0R
chr1R	588.575	100053404|F|0--26:A>G	TGCAGGGGTGGCCGAAACGGATAGCCACAAGATCGGGTCAAGAACGCACGCGCGCTGACCGCATGCGGG	98.551	69	1R	139.79
chr1R	588.575	3742118|F|0--26:G>A	TGCAGGGGTGGCCGAAACGGATAGCCGCAAGATCGGGTCAAGAACGCACGCGCGCTGACCGCATGCGGG	100	69	0R
chr1R	589.812	100003490|F|0--30:G>A	TGCAGCATCTCCGCCATCCTAGATCGATTGGTTGATTGTGACATGTGCTGTGCTTGACAGGAGCTGGAC	100	69	1R	139.79
chr1R	589.812	3741562|F|0--58:T>G	TGCAGGTACTTGATGTCGAACGTCGGCACGACGATGTTGGTGACGGTTTCGGCGACGGTCACGTCGTTG	100	69	0R
chr1R	590.573	100067476|F|0--37:T>C	TGCAGACCCAAATTAATGTGGGGTGAGATTAGTGGGTTACTCATGACTTTTCACAGTCCCAAGTGCCCA	100	69	0R
chr1R	590.759	100018497|F|0--34:A>T	TGCAGAGAGTATCACCAGTCAATAGATCGAATCGATGATCCACCGCCGTTCTAATGCATTCTAAGCGCT	100	69	1R	140.37
chr1R	591.271	100023097|F|0--41:C>T	TGCAGAAATGCAATGAACTATCATTGCTAAAATACTTGGCACCACTCAGCTAAGGTGGCGAGGGCATGG	100	69	0R
chr1R	591.683	100075090|F|0--50:A>G	TGCAGGTCCTCATCGGCGACTGGTTCACCAAGGACCACGCCGTCATGGCCAGCCTCCTCGACGCCGAGA	100	66	0R
chr1R	592.461	5213708|F|0--22:G>C	TGCAGCCGGCGTCCGCCGTGCCGACGTCAAGTGAGCTTTCTCCCTTGCTGCCCCGACACTCGGTTCCAG	100	69	0R
chr1R	592.513	100032296|F|0--26:G>A	TGCAGCTCTAACGCGTCCCAGTTTACGTGTCTCGGATTAGAAAGCATCTCATCCTCCGTGCCGTGCGTA	100	69	1R	139.79
chr1R	592.513	100032296|F|0--65:C>T	TGCAGCTCTAACGCGTCCCAGTTTACGTGTCTCGGATTAGAAAGCATCTCATCCTCCGTGCCGTGCGTA	100	69	1R	139.79
chr1R	594.236	100060596|F|0--43:A>C	TGCAGCAGCGCCTGTTTTGTTTCACACAACCCATGTTTGTTCCATACATCCCAAGCCCCGCAGGTAACG	100	69	0R
chr1R	595.056	3576299|F|0--27:G>A	TGCAGCTCCGCCTCGCAGAACGCATCGGAGCAAGCCACTATCTCGTGTAGTGCGGCGGCGCTGTTTGCA	100	69	0R
chr1R	595.056	100099187|F|0--17:A>G	TGCAGGGACGCCGACACACCGCCATGGTGCGATGCGTGCTCAAGGCAGAGATGTGGTGAGGACGCCACC	100	69	0R
chr1R	595.976	100001799|F|0--60:G>A	TGCAGCCCTGTTTCCCTCAGATGCAGAGAAGACGGGCAGCAAATAATAGTTTCACTGCTTGGAGCATTC	100	69	1R	140.95
chr1R	595.987	100046630|F|0--18:A>C	TGCAGAGGCTGCTCAGGAAGAGGCAGCAGTCCATGGTAGCCCAGGTCGCCGCCCTGTACCCTGTCAGGG	100	69	1R	140.95
chr1R	596.721	4094983|F|0--65:C>A	TGCAGGGCAAAAACCGAGATTTGCACAAAGCCCCTAAATTCCAAGATAATACGAAGCCCAACAGGCAAG	100	69	0R
chr1R	598.581	100008441|F|0--42:T>C	TGCAGTTGGAGATTTGAACCATCTGATCTCTGCCACCATGAGTGGAGTGACCTGCTGCCTGAGGTTCCC	98.551	69	1R	141.52
chr1R	599.014	100017977|F|0--9:C>G	TGCAGTGACCAGGATCAGTTTCCATGTTGTAAACACAATAGCCTTGGCCAGCTTGACCGCCGTAGCGCC	100	69	1R	141.52
chr1R	599.74	100001510|F|0--57:G>C	TGCAGTTCCGAGAGAATATTCGTACTGATTTTCCCATGTCAAGTCATCCAGTCCTCAGTAACAACGACC	98.551	69	0R
chr1R	599.74	100001510|F|0--8:C>G	TGCAGTTCCGAGAGAATATTCGTACTGATTTTCCCATGTCAAGTCATCCAGTCCTCAGTAACAACGACC	98.551	69	0R
chr1R	599.74	3600308|F|0--57:C>G	TGCAGTTCCGAGAGAATATTCGTACTGATTTTCCCATGTCAAGTCATCCAGTCCTCACTAACAACGACC	100	69	0R
chr1R	599.998	100011293|F|0--28:A>G	TGCAGAAGTAATTTAGGATGTGACATATATTGATTGCTCAATAGCCAGTAGTAGCTAGTATTTTGTGTA	100	69	1R	141.52
chr1R	601.135	3908482|F|0--46:C>G	TGCAGGCGCTCAAGGCCAAGGAGGCGCAGAAGAAGTCCGCGCAGGCCGATGAGGAGGCTGGCTCCCTGT	100	69	0R
chr1R	602.386	100043735|F|0--35:G>C	TGCAGCCTGCGCTGGAGCTGCTGGTTGGCGGCGCGGAGCTTCTTGACCTCCTCCTCCAGGAACGCGGCG	100	69	0R
chr1R	602.71	100029868|F|0--67:C>T	TGCAGGTCAGGCTTCCATTACCAGCAACACCGCAGCATTTTCTAGGGAAGCAGTTACCCACAACAATCG	100	69	0R
chr1R	603.447	3595284|F|0--7:C>T	TGCAGATCCTGACACAAGAAATCTGACTTCAGTGAGTGGTTAGAACTCAGAAAGCTATATATATGAACA	98.551	69	0R
chr1R	603.447	100006922|F|0--7:T>C	TGCAGATTCTGACACAAGAAATCTGACTTCAGTGAGTGGTTAGAACTCAGAAAGCTATATATATGAACA	100	69	0R
chr1R	604.432	3349913|F|0--39:T>C	TGCAGACCAAGATTTCACAGAGCTCGTGCAAAAAGTCCCTGATGGCTGCCTGTTCACCATAGTCTCTGA	100	69	0R
chr1R	604.836	100053082|F|0--7:C>T	TGCAGTACAGCCTCCGCCTGGCGCCGTGACGCAAGCCCTACACCATCCATCATGCACCCGCCCCCGTCC	100	69	0R
chr1R	604.965	100042233|F|0--68:G>C	TGCAGCTGGCTAGCTACTCTCGGTTGGTGAGCGTGCGCATCGCATTCGCACGGGCGCGTTCTCCAGGGG	100	68	1R	142.63
chr1R	606.004	5220197|F|0--26:T>C	TGCAGGGCCAGAGCGTGGAGAGCAAGTCCAGCGGCGTCTGGAGCGCCGACGCGGAGCTCTTGAACGGCC	100	67	0R
chr1R	608.31	3361877|F|0--6:G>A	TGCAGCGCCGCAGTGCCTGTGCGAGTGGTCGTCATGGTGATGGTGGTGGCACCCCGCGTGGCCGACGAA	100	69	0R
chr1R	608.315	100064490|F|0--34:G>A	TGCAGGGGACCTGGAGACGGTTGAGTGCGTAGGCGATTGCAGAGCCCACGGCGAAGGAGAAGGCGAAGA	100	69	0R
chr1R	608.718	3343218|F|0--5:A>G	TGCAGACAGTTACATTCTAGTCAGTGTACCAGCATCAGGCAGAGAACTGAGGAGCAATTGAAGAACGGC	100	69	0R
chr1R	608.858	100002182|F|0--19:G>C	TGCAGAAGAGCTATCCACTGATCTTCTTCATCCAGCGAGAGGATCGGCCAAGTTGCATTTTCCTAACCG	100	69	1R	145.44
chr1R	608.974	100005149|F|0--26:T>C	TGCAGAATATACTCCTAGGCCCTAGCTACAACCTTCTGGCATTTTCTAACGGGTTCTACAAATGGCATC	100	69	1R	146.03
chr1R	609.134	100166320|F|0--19:G>A	TGCAGAAGCCATGAGTACTGCCATTTGAGCTGCTGTTGATTGTCCATGAGGAGAGTGCACCCAAGGGAT	100	69	0R
chr1R	609.239	5226290|F|0--10:T>G	TGCAGATTCTTGATTCTTGCGTTCTAATCAACGTTGTGAGTTGCAGCTGATCGGCTGGCGGGCATGGCA	100	69	0R
chr1R	610.599	100110721|F|0--6:A>C	TGCAGAAATCCATAGCTCAGTAAAATCTAGTGTTCGATCTTAACAGAACAACAACATAATGAACATGAG	100	69	0R
chr1R	610.614	100082117|F|0--42:G>A	TGCAGTGGCTGAACGTCTCATCGGTTGCACTCACTCGGCATCGAGTCGTCGCGGGCAGAGGGTCGTCGT	98.551	69	0R
chr1R	610.622	100018647|F|0--16:T>C	TGCAGTCGATCGGTACTACTCCACTGGTACTACCTTGGAGCAACAGCAAGCTTGCATACCCATGTCGTA	98.551	69	0R
chr1R	610.658	3356837|F|0--52:A>G	TGCAGGTTCCAGGAGGCCGAAGTGGCATCGATGAGTTCGGAGACATACATTGATTGATTAGGGGATAAG	100	69	0R
chr1R	610.812	100019268|F|0--37:A>G	TGCAGATCGGGTTCAGGTTGAGGCCGAAATAGCACTCACTGGAGGCGTACATGGTGCACGCCAGAGGCA	100	69	0R
chr1R	610.812	100019268|F|0--67:C>T	TGCAGATCGGGTTCAGGTTGAGGCCGAAATAGCACTCACTGGAGGCGTACATGGTGCACGCCAGAGGCA	100	69	0R
chr1R	610.812	100004247|F|0--62:A>C	TGCAGTCCAGCCGAGGTCGCGTACACGCTGATCCCGACAATGTGCTACTTCGAGTTCCTCCCAGTCCAG	100	69	0R
chr1R	611.129	100016613|F|0--46:G>A	TGCAGTCCGTTTTATGAGAAAATTGCTGACTTTGCCGTTCTCTACCGTAACAGATGCGTACGTGGCCTG	98.551	69	0R
chr1R	611.318	100048750|F|0--34:C>T	TGCAGGGCGACGCGAGCCGCCAGTTCCTGCTCGACCAGGCGGAGCATCCGCCTCCCGTTCTGGCTACCC	100	69	0R
chr1R	611.325	3738163|F|0--19:C>T	TGCAGCACTGGGGGACGCACCGCGTGGCCTTCCTGTTCGCGCCGGTCATCGTCACCTGGCTCCTCCTCC	100	69	0R
chr1R	611.325	3344500|F|0--7:C>G	TGCAGGTCCATTCACACACCTTAACAAACGGTGAGTGTTCGCATCACTGCTAGTCCTCGCTGCAACAAA	100	69	0R
chr1R	611.982	3730662|F|0--58:A>G	TGCAGTAGGGGCCCTTGAGCCACCCGTTGGCGATCGAACGGTACGCCGCCTCCGTGAGATGGATGCCGT	100	69	0R
chr1R	612.14	3593755|F|0--33:G>A	TGCAGATGAATAGAGTAGTTTCGAAGGACAAACGTCGTCGTCATCGCATCGGGCCATTGCCCAGGCCGA	100	68	0R
chr1R	612.14	100202287|F|0--23:C>T	TGCAGGTGAGTTTGCTGTAGACTCTGTCGATGATGACTTGGTGCAACTGCAACGGATCATGGCTTCCGA	98.529	68	0R
chr1R	612.14	100202287|F|0--59:T>C	TGCAGGTGAGTTTGCTGTAGACTCTGTCGATGATGACTTGGTGCAACTGCAACGGATCATGGCTTCCGA	98.529	68	0R
chr1R	613.833	100037497|F|0--36:T>C	TGCAGATGTAGAATATATGGATCATAGAGGTCTTCTTTCTGTACTAATGAAGATAGGTGGAAAATGATA	100	69	0R
chr1R	614.283	100006292|F|0--33:G>A	TGCAGCATGAAGTTCAGGAGCTTCTGCTTCTCGGTGTGGCGTCCGAACATGATCTTGTCACTGAAAAGG	100	69	0R
chr1R	614.283	3744749|F|0--34:T>C	TGCAGCATGAAGTTCAGGAGCTTCTGCTTCTCGGTGTGGCGTCCGAACATGATCTTGTCACTGAAAAGG	100	69	0R
chr1R	614.629	3582529|F|0--30:T>C	TGCAGCAGCTCCTCCTCAGAGCCCGCACGGTCGTCGAAGAGGCGGACGGGCGCTACATCACCAACTCCG	98.551	69	0R
chr1R	614.692	3743363|F|0--19:C>T	TGCAGCTGCTTGGCGTTGGCCGCCAACACCTTCCCCAGCTCCTCCACCATGACGCGCCGCACCGCCACC	98.551	69	0R
chr1R	614.938	100030460|F|0--42:T>C	TGCAGGCGCAAGCACATTCCTGTTGAGGTCTCCACAGGCACCTAAGGTTGATCCCATATTCTTGATCAC	100	69	0R
chr1R	614.938	100025182|F|0--60:T>G	TGCAGCGCCATATGTGAGAAAGGATATTCTGTTTGCTCAAGAAACAGCTGACAATATTGCTGCACTTCT	100	69	0R
chr1R	615.279	100043977|F|0--60:T>C	TGCAGAGGGGGCACTTCTCGCTCTCCTTGAGCGTCCCCTCAAGGCACGCGCCATGGAAGATGTGGGGCA	98.551	69	1R	146.59
chr1R	615.279	3352159|F|0--35:T>C	TGCAGAGGGGGCACTTCTCGCTCTCCTTGAGCGTCTCCTCAAGGCACGCGCCATGGAAGACGTGGGGCA	98.551	69	0R
chr1R	615.279	100075452|F|0--61:G>A	TGCAGTGCGCCGCGGATGAAGCTGAAACCGTCGACGGCGAGGACACAGACTACTGCGAGCGGCCGACGA	98.551	69	1R	146.59
chr1R	615.279	100077981|F|0--12:T>G	TGCAGCGCCATGTTGTGGTGGGCGGGGTATATCAGCGGCGCCAGCGAGGACCCGGCCCACGTCAGCGAG	100	69	0R
chr1R	615.279	100080022|F|0--16:G>C	TGCAGGCCCTGTGGTCGAGGCTGGTCTCGCAGGTGAGCGTCCCGCCGGAGGCCACGCGCGTCCACGTGA	100	69	0R
chr1R	615.459	100024272|F|0--46:T>C	TGCAGAGAGGGCACATCTCGCTCTCTCTGAGGGTTTCCGCCAGGCATGCGCCATGGAAGACGTGGGGCA	98.551	69	1R	146.59
chr1R	615.539	100035462|F|0--37:T>G	TGCAGCAGCAACCTTCCAGGAGCAAGCAAATGGCGCCTACTACTCTGAAGCTCAGGATCCTCGCCGTGG	100	69	1R	146.59
chr1R	615.539	3733051|F|0--37:G>T	TGCAGCAGCAACCTTCCAGGAGCAAGCAAATGGCGCCGACTACTCTGAAGCTCAGGATCCTCGCCGTGG	98.551	69	0R
chr1R	615.539	100034811|F|0--32:C>G	TGCAGCTAGCAAAGATTAATTACTCTGGTACTCGAAGAGAGCTGAAGATGTTGTCAGGCTTGTGATCTT	98.551	69	1R	146.59
chr1R	616.312	5138933|F|0--10:G>A	TGCAGGCGCAGGGCAACTCCGTCGTCCTGCAGCAGCACGACGACTACCTGCACAGCTTCGACGCCGCCA	100	69	0R
chr1R	616.92	5210241|F|0--14:C>A	TGCAGCTGCTTAGTCAGGCTAACTCGGAATTAGAGATTGTAGGTAACACCATGCCAACTTCTGAAAATT	100	69	0R
chr1R	617.589	100046392|F|0--53:C>A	TGCAGGTGCACTCGGACAGCTTACAGAGTGACACTCTGTTCTAGTTATACTAACAAGATCATGTTACCA	100	69	0R
chr1R	618.258	100005701|F|0--43:T>C	TGCAGCTCGAAGGAATGGAGGCGTTGCAGGACAAGTAGCACTGTGAATAACAGTCTTTGCATGATATCG	98.551	69	0R
chr1R	618.258	3585838|F|0--43:C>T	TGCAGCTCGAAGGAATGGAGGCGTTGCAGGACAAGTAGCACTGCGAATAACAGTCTTTGCATGATATCG	100	69	0R
chr1R	618.26	3908837|F|0--7:T>C	TGCAGGGTGAGTACATAAAAATCAGCTCTTGTTACTGATTAATAGAAAGTTTCAAACTTAAATCTACAT	100	69	0R
chr1R	618.271	3362287|F|0--26:T>G	TGCAGTTACCTTGGGTTGCCGTTGTCTTTACATAAGATCACGCACGAGCTCCTCCTGCCTGTTATACAT	100	69	0R
chr1R	619.579	100045931|F|0--52:C>G	TGCAGTCGCACAAGCGATTCGCCACGGCGTTCCGCGGATACTGCGGCGTCGTCGACAACGCGAGGCTCT	100	69	0R
chr1R	621.229	100068391|F|0--29:G>C	TGCAGCCAGTACGGGTACTGCGGCATGGGGGGCGACTACTGCGGCAAGGGCTGCCAGAACGGCGCCTGC	100	69	1R	149.41
chr1R	621.3	3364534|F|0--58:G>A	TGCAGCAGAAATATAGGGGATCGGCATCGGTATTTCTCTTGCAAGATTCTTGTGGAGTGTACAGAGCTA	100	69	0R
chr1R	621.3	100066441|F|0--7:G>A	TGCAGCCGGGCAACCGGGAGATATTCGTCTCCCTGGGGCTCGACGTCCGCGCCCTGTGGCTCAAGCGCA	98.551	69	0R
chr1R	621.3	3743943|F|0--52:T>C	TGCAGCCGGGCAACCGGGAGATATTCGTCTCCCTGGGGCTCGACGTCCGCGCTCTGTGGCTCAAGCGCA	100	69	0R
chr1R	621.3	100066441|F|0--52:C>T	TGCAGCCGGGCAACCGGGAGATATTCGTCTCCCTGGGGCTCGACGTCCGCGCCCTGTGGCTCAAGCGCA	98.551	69	0R
chr1R	622.149	100014870|F|0--68:C>G	TGCAGCCAATCTCGAACAAGTATGCATGGTTACCAATAATTTTGTCTGCCCATTTTTTATCACCTAGCC	98.529	68	1R	149.41
chr1R	624.532	100003296|F|0--9:C>G	TGCAGCGCCCCACTGTTAGTTAGCAACTTATTAACATGTCGGATGATGCGCTTTGCGCTTGCTTACCTA	98.551	69	0R
chr1R	625.908	3744618|F|0--55:A>G	TGCAGGCGGCGGCGGACTTGACCACGCTGCTCAAGGCGCTCGTCAAGGAGCTGACAACCTTGCGGAGCA	100	69	0R
chr1R	626.151	100018258|F|0--39:T>C	TGCAGCTTGCCTTTTGGGTCATGCAAAGTTCTTAGATGCTGCTTTAGAGGAGCAAAGGCAAATCATTAG	98.551	69	1R	151.12
chr1R	626.726	3345603|F|0--15:C>T	TGCAGACAAACAACGCCAATCTCCTGCACGTTTGTGTGTCCATTTGTCTGGTTTGTTGCAGATACTAAT	100	69	0R
chr1R	626.727	3583844|F|0--44:C>G	TGCAGCCCAACCGCACGCAACGAATAGACCGACGTGCGTGCGCCCAACTCCTTGGCCTCGCGACGCACC	100	69	0R
chr1R	626.728	100053510|F|0--28:G>C	TGCAGTTCCTCACCAACTCCTGCGTCGTGCTCTTCATGATCCAGAGCGTCGACCGCCTCGTCCTCTGCC	100	69	1R	151.12
chr1R	626.73	3887145|F|0--23:A>G	TGCAGCACAAAGCAAGCAGCATCATTAGGCCAATTGTCCATACATACATTAGACTACACATGACAAAAT	100	69	1R	151.12
chr1R	626.879	100008546|F|0--27:T>C	TGCAGTCAGCCTTGCTGTACCACGTAGTAGTACTGTGCTAGTCCATCATCAGTTGTTGTGTAAGAACAT	100	69	1R	151.67
chr1R	626.879	100003369|F|0--14:T>C	TGCAGCAAACTTGATGTGGTACTCAACGAGCGATGTGCGTACGTGCAGGTTAATGAGGCAACTGTCTGC	100	69	0R
chr1R	628.096	100084939|F|0--62:G>C	TGCAGGACGAGCGTGACGGCGATGATGACGAGGAACATCCTGTTCTTGAGCACCCCGGCGAAGACGTTC	98.551	69	0R
chr1R	628.735	100027977|F|0--6:T>A	TGCAGGTGGACGAGTCGAGCATGACAGGGGAGCCCCACCCAATCGAGATCGATGCCGAGAAGAACCCCT	98.551	69	1R	151.67
chr1R	630.12	3730196|F|0--60:A>C	TGCAGCGCCGGCATTATCGCTATTGACCTCGCCAGACGCCTGCTTCAGGTATTATGAGTAATGTGCTAG	98.551	69	0R
chr1R	630.249	100042597|F|0--44:T>A	TGCAGGACATGTTCATAGGTGGCACCGACACGATCTACAAGACGTTAGAATGGACCATGGCCGAGCTCG	98.551	69	0R
chr1R	630.249	100042597|F|0--44:T>G	TGCAGGACATGTTCATAGGTGGCACCGACACGATCTACAAGACGTTAGAATGGACCATGGCCGAGCTCG	98.551	69	0R
chr1R	630.249	3587480|F|0--44:A>T	TGCAGGACATGTTCATAGGTGGCACCGACACGATCTACAAGACGATAGAATGGACCATGGCCGAGCTCG	100	69	0R
chr1R	631.635	100032206|F|0--28:T>C	TGCAGCTGGCGATTGAGGAGGAGGACGATGCCACCAGCAAGCTGGCGCAGCCGATGCAGCCCTCCCGAG	100	67	1R	152.23
chr1R	632.323	100001285|F|0--66:T>G	TGCAGAATCTGAAACCACCATCCATCCCGCGAGGGATCCTATCACGTCATCTCTGCTAGTTAAACATAA	100	69	1R	152.23
chr1R	634.402	4093416|F|0--11:G>T	TGCAGCTGGAGGTCAACGTCAAGCGTGGAGACCTCCGGTGTCGTCTCCGATTGATATCCCTACCGAGAT	100	65	0R
chr1R	635.129	100101980|F|0--32:C>T	TGCAGACTCCTGAGCTCTGAATCAAAATCTTTCTGCATGGACACGGCGCGGCGGCTGAACTGCTCGTCG	100	69	1R	153.91
chr1R	635.129	100101980|F|0--47:G>A	TGCAGACTCCTGAGCTCTGAATCAAAATCTTTCTGCATGGACACGGCGCGGCGGCTGAACTGCTCGTCG	100	69	1R	153.91
chr1R	635.129	3597695|F|0--47:A>G	TGCAGACTCCTGAGCTCTGAATCAAAATCTTTCTGCATGGACACGGCACGGCGGCTGAACTGCTCGTCG	98.551	69	0R
chr1R	635.137	5200022|F|0--10:G>C	TGCAGTCGCCGACGGTGGTTTCGTCCTCGGGCCACCGCTCCTGCTCGGCCTCCTCGTAGAACCCCAGCA	100	69	0R
chr1R	636.209	5227734|F|0--65:T>G	TGCAGGGTCGTTGATCCCGAGGTGGATTGGCCTCGGGAGGCGTGAGCAGTGTTGGCGTCGGTTTTTGTT	98.551	69	0R
chr1R	636.615	100107580|F|0--57:A>C	TGCAGCTGAACTCAACCTCGCGCGGGCGGTACTGGTACTGCTGGTACACGGCAGCGCAGGGGTCCATGG	98.551	69	0R
chr1R	636.938	3906544|F|0--20:C>G	TGCAGCTGCGGGAGCTGGAGCCGCCGCGGCAGCCCAAGACGACGCAGAACACGCCCCGCCTCCCGAGAT	100	65	0R
chr1R	636.938	3907908|F|0--20:C>G	TGCAGCTGCGGGAGCTGGAGCCGCCGCGGCAGCCCAAGACGACGCAGAACACGCCCCGCCTCCCGGCCA	100	69	0R
chr1R	636.991	5222118|F|0--60:G>C	TGCAGGGTCGATGGATTCGATGATCACCATCCACCCGACCAGGCCTAGACGAGCGAAGAGGGGTAGGGG	100	69	0R
chr1R	637.022	100056442|F|0--44:T>C	TGCAGCTGCAACACCGCTCGCGTCGCCATAGATTGTGTGGCGCATCCCCACGCCCACGCACTCATGGTC	100	69	1R	158.43
chr1R	637.269	3743531|F|0--52:T>C	TGCAGTGTACGTCTCACCTGCTAAAAGCTCATACTACCTTTCTTTTTCTTTCTTTTTTATGCAAGGAAA	98.551	69	0R
chr1R	637.366	5046222|F|0--7:T>G	TGCAGTCTGGGAAGAGCATCGCCGACGCGGCGGACGAGTGCATCGGGGACGCCAGGCACAGCGACGACT	100	69	0R
chr1R	637.367	3365195|F|0--58:T>G	TGCAGGAGTTCATCCTGTCGTCCAACCAGCTGTCGGGCGCGATCCCGGCGAGCATCGCTTCGCTCGGTG	100	69	0R
chr1R	637.368	3731817|F|0--29:T>C	TGCAGCTTGGTGAGGTTCCAGATCGACGGTGGAATGTTGCCGGTGAAGGCGTTCGTCGACAGGTCAAGC	100	69	0R
chr1R	637.529	5047337|F|0--17:T>C	TGCAGTAAAACCCTTGGTGCTGTAGCTATTTACAGAGGCGTACAAAAATGATACATTTAGTCAACCCTA	98.551	69	0R
chr1R	637.529	5047337|F|0--24:G>C	TGCAGTAAAACCCTTGGTGCTGTAGCTATTTACAGAGGCGTACAAAAATGATACATTTAGTCAACCCTA	98.551	69	0R
chr1R	637.647	100010095|F|0--12:G>A	TGCAGGAAATCAGCTCCACCAACAAATAACTCATATCTATCTCCTTCTATGTCCCAAAATTTGGATGGG	100	69	0R
chr1R	637.649	100024420|F|0--5:G>C	TGCAGGAGGACCGAGTGCGGCGTCCAGTACTCCACGCTGGACCAGGTCGCGAGCTGCCCGATCCCCAAC	98.551	69	0R
chr1R	637.718	100016087|F|0--38:A>G	TGCAGCAGCAGCCATGGATCACACAAGAAATGAGAAAAACTTGGCAAAATTCACATCCCCGAGAAGGCC	100	69	0R
chr1R	637.784	100029755|F|0--53:C>G	TGCAGGCAGCTCCATGCCCTCCTCCTCAAGAACCTCGCCTTCCAGGTGAGTCACTGAGTTTCTTCTGCC	100	69	1R	158.98
chr1R	638.132	100107871|F|0--18:T>A	TGCAGCTTGGCCAGGTGTTGGTCGCTGCACTGGATCCAGTAATTAATCGTTTGCGTCAATTGTCCTGAG	100	67	0R
chr1R	638.132	100046207|F|0--23:G>A	TGCAGCTTGGCCAGGTGTTGGTCGCTGCACTGGATCCAGTAATTAATCGTTTGCGTCAATTGTCCTGAG	100	67	0R
chr1R	638.135	100078619|F|0--10:A>C	TGCAGCTCATATCGGCAGGCAACAAACGAGCTCTTCCGCCGCTCGATCTCCCGACCCGCGCCGTAGCTC	98.551	69	0R
chr1R	638.135	3742078|F|0--56:A>G	TGCAGAAGAAGGAGAAGCCGCGCGGGCACAAGATGAAGCCCTGCAAGAGCTACGCCACGCTCGGAGGCA	100	69	0R
chr1R	638.919	100060332|F|0--46:G>A	TGCAGTTGCCGAAGCTGGCCACGCGCAGGGTCGTCGCGAAGCGGAGGACGGACAGCGGCATCGGAATTT	100	69	0R
chr1R	639.08	5214725|F|0--66:C>G	TGCAGCCGGCCCGAATGGTCCAAGATATCAAGTCCCCACATGACAAAGGGCCAGGTGATAGGGATGCAT	100	66	0R
chr1R	639.444	100055535|F|0--46:C>T	TGCAGCTCCTCCCCAGCAATGTCGTGCGGCAGTTCTACGTCAACCTCAACGGCAAACCGTGGTACCCGA	100	69	0R
chr1R	639.55	100042727|F|0--43:G>C	TGCAGTCTGCATCACGGCTGTTGGCGCGTGAAAGCGCAGGTTGGCGATGTTGTCCGTTACCTTCTCCGC	100	69	0R
chr1R	639.55	100009089|F|0--36:C>A	TGCAGTGATATCGCGCACCGACACTAAGTCCAAGACCATCCAATTCTTGTGGGAAACCGTGCCGAACCA	100	69	0R
chr1R	640.125	100113618|F|0--10:G>A	TGCAGCCGGGGAGAAGGTGCACTGCACTGCACGCACATATGTTTCTTCCAGTCTGTCATTCATCTGCTT	100	69	0R
chr1R	641.841	5205974|F|0--9:T>C	TGCAGATGCTGGTGCGGGAAGGGAAGAGGTCAGGGGTGCTGCTTTTTTGTGGCTGCAATTGATGGTGAG	98.551	69	0R
chr1R	642.079	100015934|F|0--16:C>T	TGCAGAAGGCGTCCATCCTTGGAAGGAAGAGGAAGACAAACATGCCCGACGGGCCTTCAACGCCCTGAA	98.551	69	0R
chr1R	642.428	100074762|F|0--25:T>C	TGCAGGAGAAGTTCATCAAGTTCATTGAGGGCAGCCGATACGTCCCCGTGAGGCCCGCCCCCTGCGGCG	100	69	1R	161.77
chr1R	642.903	100064200|F|0--9:G>C	TGCAGCAGCGCCCGCGCCCGCGGCCCCAGGCGTCGCAGGACTCGCGCAACGTCTGCGGCATCCCCTGGA	98.551	69	1R	162.33
chr1R	642.903	3908680|F|0--46:C>G	TGCAGCAGCGCCCGCGCCCGCGGCCCCAGGCGTCGCAGGACTCGCGCAACGTCTGCGGCATCCCCTGGA	98.551	69	1R	162.33
chr1R	642.911	100004492|F|0--36:A>T	TGCAGTGAATAAAGACATACCTACTTGTGTTGTGTGACATATTATGCATTTTCTCTCTATATATACGCT	100	69	0R
chr1R	643.02	100029191|F|0--24:G>A	TGCAGCGAGACATACACACCCAGCGCTACTCAGCTCTAAAAAATGGTTTTCCTTGTCGAAACGTGTCAC	100	69	0R
chr1R	643.143	3364159|F|0--32:T>G	TGCAGCCAGACATACTCAGTGCTACTCAGCTCTAGAAACGGTTTTCTATGCCGTAAAATTGCAACATAT	98.551	69	0R
chr1R	643.286	100026290|F|0--32:G>T	TGCAGCCAGACATACTCAGTGCTACTCAGCTCGAGAAACGGTTTTCTATGCCGTAAAATTGCAACATAT	100	69	0R
chr1R	644.263	100063299|F|0--18:G>A	TGCAGTGAGCAACCTACTGATTCAATTTAGGCTGCACTGAACCACCCGAACCATTTCAACTGATGCGAT	100	69	0R
chr1R	644.263	3359812|F|0--15:T>A	TGCAGGCGCGTAGATTTTGTGTTGTAATAAAACAGAAAAAGAATTAAGATGACCCAGCCTAACACGGAA	100	69	0R
chr1R	644.968	4094722|F|0--6:T>C	TGCAGGTCCTGCACCAGACCATGCCCTGCACGCCGATGCTGAAGTTCACCGGCGACTGGGAAGGGGGCA	100	69	0R
chr1R	644.968	100022030|F|0--40:A>C	TGCAGTGCCGGCACGGCCCGCGGCGGCTGAAGAGGGTGGGAGGGGTGACGGGCCAGGGCGGCTACTTCA	98.551	69	0R
chr1R	645.031	3356948|F|0--32:T>C	TGCAGGTACGTCGGCTACAACGCCGACATGGATGCCTCCCCGCTCCAAGGTTAACTCTTATCTCTGCGT	100	69	0R
chr1R	645.031	100048747|F|0--32:C>T	TGCAGGTACGTCGGCTACAACGCCGACATGGACGCCTCCCCGCTCCAAGGTTAACTCTTATCTCTGCGT	98.551	69	0R
chr1R	645.038	3730048|F|0--32:T>C	TGCAGGCGCTCTACTCCGTCGGCAACTTCTTCTTACGCCCTAGCAACCCCAACAAGTGCTACTGACGCA	100	69	1R	162.9
chr1R	645.038	3730048|F|0--7:G>A	TGCAGGCGCTCTACTCCGTCGGCAACTTCTTCTTACGCCCTAGCAACCCCAACAAGTGCTACTGACGCA	100	69	1R	162.9
chr1R	645.873	100059633|F|0--16:A>G	TGCAGAGACAAACACAAAAGCACCAATTCCCAAATCAACATCTCGCGAAACGGTTGCCGTCAAGGTGCA	100	69	1R	163.46
chr1R	645.873	3596203|F|0--16:G>A	TGCAGAGACAAACACAGAAGCACCAATTCCCAAATCAACATCTCGCGAAACGGTTGCCGTCAAGGTGCA	98.551	69	0R
chr1R	646.671	100019214|F|0--5:C>T	TGCAGCATTTGACCATACAGGCGGAAGTCGCTACCGATGGTTTATTATAGCGACGACGATGACGAGGAC	98.551	69	1R	164.02
chr1R	646.919	100042835|F|0--33:T>G	TGCAGCCGCATACTTCAGTAAGTAGTAGTATCTTCTTTGCTTGATGGACACCATGGACGCTTGGTTAAA	100	69	1R	164.02
chr1R	647.384	3595521|F|0--11:A>G	TGCAGAACGTGATCCAGATGATCTCCGTGATGTTCGTGGGCCACCTCGGCGAGCTCGCGCTCTCCGAGA	100	66	0R
chr1R	647.599	3594960|F|0--29:T>C	TGCAGATGGAAGCCCAGCGTCCTGGACGATGAGCCCTTGACGAGGAGGTCGCTGAGCCTCACCACCTGG	98.551	69	0R
chr1R	648.232	100084913|F|0--28:T>C	TGCAGACTGTCGTGCCCTTTGAGATGGATTGGCCGACTCTCTTCTTGTCTCGTCTCGAGGGCCACAAAG	98.551	69	1R	164.58
chr1R	648.232	100084913|F|0--34:G>C	TGCAGACTGTCGTGCCCTTTGAGATGGATTGGCCGACTCTCTTCTTGTCTCGTCTCGAGGGCCACAAAG	98.551	69	1R	164.58
chr1R	649.095	4105114|F|0--15:T>C	TGCAGTTGGTGGTGGTGGGGAGGCTGAAGGTGGGCTTGCAGCCCTTCCTCCAGTCCCGGCGGTCCGCCC	98.551	69	0R
chr1R	649.195	3743823|F|0--67:T>C	TGCAGTTGGTGGTGAAGGTGGGCTCGCAGCCCATTCTCCAGTCCCGGCGGTCCACCCATTCGTACCCTG	100	69	0R
chr1R	649.285	4093709|F|0--38:C>T	TGCAGCCGGGGACCTTGTCCACCTTGCCTCTCCTCATCCGCCGCCTCACCTGCACCGCCTTGCCGTGCC	100	69	0R
chr1R	649.69	5221675|F|0--15:A>G	TGCAGTGGTACCGCGACGCCCGCTGCTCCCTGAACCAGAAGCTACGGATGGCCCCGTACGCCTGCGAGC	98.551	69	0R
chr1R	649.736	3908738|F|0--52:A>G	TGCAGACGGCGAGCCGTGCGAAGCCGACCGGGACAGCCCTCAGCAGCAAGCTAAGCATGCGCCTCCACC	100	69	0R
chr1R	649.806	100004512|F|0--32:G>A	TGCAGCGGTGATACTACACATCATTAATTATTGGAAAACTAGTTGGACCTCTCAAATGGTTACCCGAGA	100	66	0R
chr1R	650.224	100104640|F|0--57:C>T	TGCAGACATATTCACAGTGGCTGATCCACTGGATGGGAGCACCGGCGGGGCGCTGGTCGACAAGATTCT	98.551	69	0R
chr1R	650.224	100024232|F|0--12:C>A	TGCAGTAATCTCCACCAAGAAGCTCTCCAGCTCTCCCTTGTTCCACTCAGCAAACACATCGGCTATCTC	100	69	1R	167.39
chr1R	650.224	100024232|F|0--30:C>T	TGCAGTAATCTCCACCAAGAAGCTCTCCAGCTCTCCCTTGTTCCACTCAGCAAACACATCGGCTATCTC	100	69	1R	167.39
chr1R	650.224	3744418|F|0--30:T>C	TGCAGTAATCTCCACCAAGAAGCTCTCCAGTTCTCCCTTGTTCCACTCAGCAAACACATCGGCTATCTC	98.551	69	0R
chr1R	650.224	5213952|F|0--12:A>C	TGCAGTAATCTCAACCAAGAAGCTCTCCAGCTCTCCCTTGTTCCACTCAGCAAACACATCGGCTATCTC	98.551	69	0R
chr1R	650.406	5046630|F|0--18:A>G	TGCAGCTGTGGGCACGAGACGAAGACGCCCTCGTAGGCGGCCGTGGGTGAATCGGCAACGTCTTGCAGG	100	69	0R
chr1R	650.406	5046630|F|0--56:A>G	TGCAGCTGTGGGCACGAGACGAAGACGCCCTCGTAGGCGGCCGTGGGTGAATCGGCAACGTCTTGCAGG	100	69	0R
chr1R	650.406	100020809|F|0--40:G>A	TGCAGGTGGTGCACCTCAACTCCTGTCTCTGCGGCGACAGGGACATGATGATGATTGTGGATGCCCCCG	100	69	1R	167.39
chr1R	650.406	100020809|F|0--8:G>C	TGCAGGTGGTGCACCTCAACTCCTGTCTCTGCGGCGACAGGGACATGATGATGATTGTGGATGCCCCCG	100	69	1R	167.39
chr1R	650.917	100014253|F|0--17:T>C	TGCAGATCAGATGCATGTGACGACCCAAGTTGTCACTGAGCATTTTTCATCACCACTTTGTGTGTGCTC	98.551	69	1R	167.39
chr1R	650.928	100006075|F|0--27:G>A	TGCAGGCAAGTTCGCTCATCTCTGTCAGTGTTGAAATTTGTATCCATTTGGCTGTTTTATTATCCCGAG	100	67	1R	167.39
chr1R	651.165	3580213|F|0--44:G>A	TGCAGACGAGATCGATCCCAACACCACAGACTCGAGGCTCCAGCGCGGGGAGAGCATACGTAGACAAGG	100	69	0R
chr1R	651.187	100017643|F|0--11:T>C	TGCAGGCAAAATGCCCTGAGAAGAGACGCACCACTGCTTGACCAAACAATTATTAACAGCTTTAGAAGC	100	69	0R
chr1R	651.187	100017643|F|0--32:A>T	TGCAGGCAAAATGCCCTGAGAAGAGACGCACCACTGCTTGACCAAACAATTATTAACAGCTTTAGAAGC	100	69	0R
chr1R	651.266	3892207|F|0--46:T>G	TGCAGCACGGGAGCCGCCGCGAGGAGACGCCCCGCTGCCGCCGTCGTTCGCGTGGGCTTCGCCCGAGAT	100	65	0R
chr1R	651.857	100047945|F|0--55:C>A	TGCAGACCTCCAGACATCTGGACACATGCTGGATGTATCAGCCGGGATCCGCGTGCGAGAGCCTGCCCT	100	69	0R
chr1R	652.266	3886924|F|0--20:T>A	TGCAGGGACTGAACACGCATTTGCTCTGTTTTTGCTAATGGATCTGATGCACTTATACTGGACACCATT	100	69	0R
chr1R	652.266	3886924|F|0--7:A>G	TGCAGGGACTGAACACGCATTTGCTCTGTTTTTGCTAATGGATCTGATGCACTTATACTGGACACCATT	100	69	0R
chr1R	652.805	100108891|F|0--16:G>C	TGCAGGGGAAGGGCAGGCGGAGCGGCCTGCGGAGTGCAAGCAACAGTGAGGTGCTTCACGCATGGAGAC	100	69	0R
chr1R	652.805	100108892|F|0--64:A>G	TGCAGGGGAAGGGCAGGCGGAGCGGCCTGCGGAGTGCAAGCAACAGTGAGGTGCTTCACGCATGAAGAC	98.551	69	0R
chr1R	652.953	5211868|F|0--25:A>G	TGCAGGATTCGAGCTCGTTCACATGACCATGGCAGGCAGGGTGGGAGCTTTCAATAAGCAGACAAATGG	100	69	0R
chr1R	653.041	100014754|F|0--65:G>C	TGCAGCTCGCCCTTCATCATGCCGCCGAACTCCAGCACGCTCCACGCCAGCATCGTCGAGCTGAAGGCC	100	69	1R	169.65
chr1R	653.19	3735059|F|0--41:A>G	TGCAGGCCGCAGCTAGCCCAGCCACCCAAATGGGCTGGCTCATGTTTACATGGCCGGCTGTGCTTCAGT	98.551	69	0R
chr1R	653.211	100025882|F|0--29:T>C	TGCAGCGAGGTCGCTAACTCGGGAGCAGGTGAAGCCGTGACCTTGGCATAGAGCTACTTTGTCGGGCAT	98.551	69	1R	169.65
chr1R	653.577	100029780|F|0--26:G>C	TGCAGCGGGCTGCCGGAGGGAGGAAGGGGGGATGGCGAGCCGGCTGTGGAGGTGGTACGCGGACCGAGA	100	66	0R
chr1R	655.126	100081439|F|0--20:G>A	TGCAGTACCGTCCCATAGGCGGACTCGCTAACGCCGTATCAGTCCAGACAGAGGTAGACGGACCCGTAC	100	69	0R
chr1R	655.209	100128323|F|0--19:G>A	TGCAGAGGCAGCGATCTGGGGGCGTGCCGTATTACAGCAGAAGGGTGGCGCTCTCCTCGTTGGACTCGG	100	69	0R
chr1R	655.209	100084547|F|0--6:T>A	TGCAGCTGAAACGGCCCTCTCCGACTGCCACCGACGTCCTCCAGCCTTGCTTTGGCAGCCTTGGTCAAG	98.551	69	1R	170.77
chr1R	655.943	3909544|F|0--40:G>C	TGCAGAGGCTGGTGCCGGGAGGGAGCAAGATGGACACGGCGTCCATGCTCGACGAGGCGGCCAGCTACC	98.551	69	0R
chr1R	657.101	100016918|F|0--22:T>A	TGCAGATGGACTCACACGCGGCTCCCCTTTACACTTGTTTATTGCATGCAGCTTCTTCACCCCTTTTGG	100	69	1R	171.93
chr1R	657.947	3347848|F|0--18:A>G	TGCAGCAAGTCATCACACACACTCATCATTGCGTACCGTAACTTTCCGTTCAGCTCACAGCGTTGTTGG	100	69	0R
chr1R	657.947	100007549|F|0--38:T>C	TGCAGCCATACACCCACGTACGGTTCTGCTAGGATGAGTCATGCGTGCATGCATCAAATTTCACGTACG	100	69	1R	171.93
chr1R	660.238	100055917|F|0--23:C>G	TGCAGGACGGCTCCGCCGCCACGCCTTCGGGAAGATCAGATTGGCAGCTCAATACGTCGATCCAGCCGT	100	69	1R	173.64
chr1R	660.521	100050959|F|0--7:G>C	TGCAGGCGTACTGCTCGAATGGATCGTCGACACAAAGTGCCGCCGCACGGTCAAAAACCTTTTGTTTTT	98.551	69	1R	173.64
chr1R	660.707	3884241|F|0--7:C>G	TGCAGGCCTACTGCTCGAATGGATCGTCGACACAAAGTACTGCCGCACGGTCAAAAACCTCTTGTTTTT	100	69	0R
chr1R	661.356	100031100|F|0--53:G>C	TGCAGCAGAGGCCTTGTTGCAGAAATTTTTCATTGCAATAGTGTGGTGCACGCGGCACATACAGGACAC	100	69	0R
chr1R	662.012	100079325|F|0--21:T>C	TGCAGCTTTTTTCTCGCCGGTTTCTAGTTGAAGCTTTTCAAATATGTGGTTGAAGCTTTTGTGTCAACA	98.551	69	0R
chr1R	662.012	100013510|F|0--37:A>G	TGCAGCGGCGAGCCGTTGATGCATGCGACGGATGCTGAAACAGGCGCTCCCGCCATTGCTCAAACCGAC	98.551	69	0R
chr1R	662.024	100082907|F|0--46:C>A	TGCAGGCGTTTGAGGGATCGTATTTGCCAAATTCACAGGTATTTTCCTCAATGATGGGATGGGGAGCTG	98.551	69	0R
chr1R	663.429	100024614|F|0--10:C>A	TGCAGACCAACGAACTGAGGTATCGTTTTTTTTTACGGGAACCAGGGATGAAAACTTGCCCATCACAAA	100	69	0R
chr1R	663.655	5044979|F|0--30:G>A	TGCAGACCCAAACTGATTCAACATTGTGAAGCCAGATCTTCTTCATCAGGAAAGCGACGGCCGATGAAA	100	69	0R
chr1R	663.87	3577655|F|0--40:G>C	TGCAGGTGTACCACGACACATACGCGCTGGTTGTCAGCACGGAGAATATCACCCTAAACGGGTACTTGG	98.551	69	0R
chr1R	664.855	100066352|F|0--58:T>C	TGCAGGTGCTGGCCATCCTCCCGTCGTACGCGGGCAAGACGGTGCTGGAGCTCGGCGCTGGCATCGGCC	98.551	69	0R
chr1R	664.908	100085450|F|0--19:C>G	TGCAGCTGTTCCGCGCGACCCAGAAGGACTACAGCGAGGCGGCGCGGTGGATCATCGGCCTCATGGCGA	98.551	69	0R
chr1R	664.908	100085450|F|0--40:G>C	TGCAGCTGTTCCGCGCGACCCAGAAGGACTACAGCGAGGCGGCGCGGTGGATCATCGGCCTCATGGCGA	98.551	69	0R
chr1R	666.585	100032481|F|0--43:C>T	TGCAGCAGCTATTCGGTGCTTAGGCGAAAGGTCATTAAACATCCGGTGTATTCTAATTCAAAAAAAAAA	98.551	69	1R	178.15
chr1R	666.587	100093223|F|0--14:G>C	TGCAGCATGTGGCCGTGGCCGTGGCCTCCGGGAGCAGCGAGGGCTGGGTAGGTATCTGCCACTGCCATG	98.529	68	0R
chr1R	666.737	100029983|F|0--68:C>G	TGCAGAAAATGGAGCTACTGCTTGCACAACAGCATTTTTCATATCAACTGTGATGACCCAGGCCTTGTC	100	69	0R
chr1R	667.911	100109663|F|0--35:G>C	TGCAGTATCTCAATGGCTGCCGTCTTCTGCCCCTCGAGCCTGAGCGAATTGAGCGAATTGGCAAGGTAA	98.551	69	0R
chr1R	667.911	100139343|F|0--32:C>T	TGCAGTATCTCAATGGCTGCCGTCTTCTGCCCCTCGAGCCTGAGCGAATTGAGCGAATTGGCAAGGTAA	98.551	69	0R
chr1R	668.255	3909602|F|0--21:C>A	TGCAGGTCCCGTGACTCTGATCTCTGAATCCTGACCTAATACGAGTATGTTTCAGTTTTTCAACGTGCA	100	69	0R
chr1R	668.845	100037105|F|0--38:C>T	TGCAGCTCTTTCTTCGGCTGCGCGCCTATGTGTCGCGTCCTGCGGAACGTTCTATATGACGCATTCTGC	100	69	1R	178.7
chr1R	668.848	100006299|F|0--23:A>G	TGCAGTCAGTGCTTAATTAGCACAAGCAAGGGAGAAAAGAACAAGGGCCGAGCGGATTGTTGCACTGAC	100	69	1R	175.91
chr1R	669.782	3735139|F|0--47:A>C	TGCAGATATCGTGTGGCAGTCCGTCAGTGCAATCTTCAGGAGATACTACTGTACTTATAACAGCTAGAT	100	69	0R
chr1R	669.782	100020476|F|0--22:G>C	TGCAGCCTCACCCTGCAACTGCGTCAGTTCATTCAGAACACTGCTCTGCTCAATGCTCTGTTCTGAATG	100	69	1R	179.82
chr1R	669.861	100011247|F|0--22:T>C	TGCAGTAGTGCGATCAGTTCGGTACAGTCTGATTCCACCTCAGGAGGTTGCTTGGACCAGTGCAACGCC	98.551	69	1R	179.82
chr1R	669.869	100078292|F|0--60:A>G	TGCAGCTCCCGCAGCTCCCTCTTGACGCGGCCCAGCTCGCGCATCACCTCGGCGTACGTCACGCCGCCG	98.551	69	1R	179.82
chr1R	670.128	3595321|F|0--59:A>G	TGCAGTTGTCCCCGATCACCGCCACCACCCACAGAGATCCAATCACCTTTCATGGAGGAAAAGAACATA	100	69	0R
chr1R	670.391	3358957|F|0--45:A>G	TGCAGACGCACCACTTCGCCTACGAGGAGCTGGAGGAGGCCACCGACGGCTTCAGCGACACCCGCGAGC	98.551	69	0R
chr1R	670.396	3359944|F|0--9:A>T	TGCAGCGGCACCAAGAATCGGTGTCCAGAATCAATATATACGATCTGTTGCAGCACCAATCGTTTAGAC	100	69	0R
chr1R	670.47	3597517|F|0--13:C>T	TGCAGTCCAGAAACCGCCACCGAGCTCAGCGACATGCACGCTTGGAGTATCCATGTAACGGCGATGGTG	98.551	69	0R
chr1R	672.12	100006054|F|0--60:G>A	TGCAGCTCACATTCCTGATGCGAGCATGCCGTCAAGTTGGATGGACCCACGTTTAGCTTCGGAATTTGT	98.551	69	1R	182.63
chr1R	672.367	100064101|F|0--34:A>C	TGCAGGTTCTCCGAGCCCGAGTCCGACTCCGACGAGCCCCGCCCCAGGCCCGACTACAACAAGCCCATC	100	69	0R
chr1R	672.9	5043149|F|0--11:G>C	TGCAGCGCGTAGACGGTCCGCAGCAGGTGCCGCCGCTCGTACTTGCCCGGCATCGTCTGGATGCCGATC	100	69	0R
chr1R	673.533	3730727|F|0--17:T>A	TGCAGATTTCTGCCCGATTCGTTTCAGGCTTTGGTTTGCCCAAATCAGTCAGTGTTGCGAATGATGTAT	100	69	0R
chr1R	673.764	100019419|F|0--47:T>G	TGCAGGAGGCGCCGAAGGAGGAAGGTCCCCGGCGGCAGCTGCGGTAGTCGCCGAGGGAGGAAGGTCACC	100	69	0R
chr1R	674.027	100021719|F|0--20:G>A	TGCAGCTTGAGCGGGCAGACGGCCTCGATCTTGCACTTGGTGTAGCGCGCCGTGTAGCTCACCTTGCGG	98.551	69	0R
chr1R	674.619	100038028|F|0--26:G>A	TGCAGCCACAAGATTCATGGATAGATGCAGATGTCGTGCAGGTGACAACGAGAAACGTGGAGCGCGCGC	100	69	0R
chr1R	674.701	5214643|F|0--19:C>G	TGCAGATCACGGCCATCTCCGCGCAGGTCGCCGTCGTGCCGCTCGGCCGCCTCATGGCCGCGGCGCTCC	98.551	69	0R
chr1R	674.775	100033913|F|0--29:T>C	TGCAGCGCCTCGCGCTCAAGAAGGTCCGTTCCATCGTCTCTACACATCTTCTCACCGCCCCGCTAGATC	100	69	1R	183.77
chr1R	674.775	3597293|F|0--29:C>T	TGCAGCGCCTCGCGCTCAAGAAGGTCCGTCCCATCGTCTCTACACATCTTCTCACCGCCCCGCTAGATC	98.551	69	0R
chr1R	674.933	100124218|F|0--36:G>A	TGCAGCACCGAGGAGGGGAACGCGCCGGGGGCGAGCGAGGGTGGTGCGACGGCCGGAGGCGCAGGAGCG	100	69	0R
chr1R	674.935	100027095|F|0--68:C>G	TGCAGGCCAAAGCTCTGGCAACGGATGTCGAGGAACCCGAGATCATGGTTCTGGCTGATCAAGCATACC	100	68	1R	188.33
chr1R	675.026	100003409|F|0--65:C>T	TGCAGGTAGAGCAGGATGCCGTGATGCATGATCCTGTTATTGGAGACAACACTGAATACCAGAGGCAGA	98.551	69	0R
chr1R	675.6	100020821|F|0--33:T>C	TGCAGACTTCAATGAGAACCTTCAACTTCATGTTCAGTGCTCCCATCATCACCAACCAAAGAAGGAGGC	100	69	0R
chr1R	676.498	100077294|F|0--8:G>C	TGCAGCTGGTTGCACTCGCTCAGGACCCTCTCGTAGACGCCGACGGGCGTGGAAGCGGGCATGTCTCGC	98.551	69	0R
chr1R	676.565	100027850|F|0--25:G>T	TGCAGGTGGGAGGTGGCGATGAGAAGGCGAGCTGGACATGGCGATCTCGCCTGTTGCCTGAGCGCTTGC	98.551	69	1R	186.66
chr1R	677.67	3909184|F|0--25:A>G	TGCAGCATCTGTCAGCGGGCCCGCAAGTTTTTCTGGCAGGCCATCCGGCCTACTCGGCACCGCAGTTGC	100	69	0R
chr1R	678.161	100044740|F|0--9:T>C	TGCAGCAGGTTCAGTATGCGGCAGCCACACCGAACACACCTTGTGAGGAAGAAGCACATGCACAAAACA	98.551	69	0R
chr1R	678.431	100074751|F|0--8:C>T	TGCAGAAACCCTTGGAGGAGAAGAGTGCAGCCCAAGAGCGGCAGACGGCCTGGAAGCGGAGAATGGATT	100	69	0R
chr1R	678.999	3593824|F|0--21:A>G	TGCAGAACATCTTGCTGAATTAGTAATATCGATTGGAGCAGCAGAAATTGGTGGTGAGATGATGGGTAG	100	69	0R
chr1R	679.013	3896781|F|0--49:G>C	TGCAGAAATCCTTGGAGGACAGCGTTGCATCCCAGGAGCGGCAGACGGAGCGGAAACGCAGAATGGATT	98.551	69	0R
chr1R	679.449	100014526|F|0--26:C>T	TGCAGTGTCTTGTGTCTTCCTTTGCTCTTGTATAAGAACGACCACGCAGAGCTGCTCTCTGATTCTCTT	100	69	1R	192.94
chr1R	680.922	100007134|F|0--30:C>A	TGCAGTGAAGTTGCAGCACTTTACACTTTACAGTACAGCAACGAGTAACTGAAACTCTGTGACTGGAGC	98.551	69	1R	192.94
chr1R	681.783	100028452|F|0--8:A>G	TGCAGGAAAGTGGCTGCATTCACTCGAAACATGATACTATAGTATGATTAGGAGCAAGAGACGCGATTA	100	69	0R
chr1R	681.783	3363346|F|0--8:G>A	TGCAGGAAGGTGGCTGCATTCACTCGAAACATGATACTATAGTATGATTAGGAGCAAGAGACGCGATTA	98.551	69	0R
chr1R	682.941	5138014|F|0--44:C>T	TGCAGCAGCCTCACTGCCCACCCCCTCCTCATATCCGTCTCCTCCGCGCTGTCTCCGCGCATATCCTTG	100	69	0R
chr1R	683.274	100122708|F|0--39:T>C	TGCAGCGCCCGTGGCCATCTCTCCCGCCCCGTCCATGGGTGGAAGAGAGGGGCTAGGGTTTCGCGCGCC	98.551	69	0R
chr1R	683.303	100080313|F|0--16:C>G	TGCAGGAGGTGGTGCTCGGCTGCACCACCTCCTACGACGGCCAGAGCTTCCAGGCCTCCGACGGCGTGC	100	69	0R
chr1R	683.469	3735204|F|0--31:C>G	TGCAGCACCTGTCGGCGACGCCGCGCGCGGTCCCCATCGTCGTCGGCGAGGCGGTCAGCACCGCCGAGA	100	66	0R
chr1R	683.885	100003476|F|0--29:C>A	TGCAGCTTACGCTTATGTTGTACGATGTCCTGTCACAGCTGTAAAATCCACATATGCAACGTTGTTTCC	100	69	1R	194.64
chr1R	684.248	100070469|F|0--24:C>T	TGCAGCGGCCAGTAGGCCACGCCGCGGAGCACGATGGCCTGCCCAAGCTCGCGCATCTCCTTGCTCTTG	100	69	0R
chr1R	684.266	100138097|F|0--7:G>T	TGCAGCCGCTGCTCGTGCTGAAGGCCCTGGTCGAGAACAACCGTTCTGGGGTGGCCGCCGCCGCCGACG	100	69	0R
chr1R	684.369	100010875|F|0--8:A>G	TGCAGGGCAAAATTTAGTCAAAACGATGCATGCCAATCCAAAAACACGGCCATCACCACGCCAGCCCGA	100	68	1R	194.64
chr1R	684.773	5204544|F|0--11:T>C	TGCAGAACTCCTTGACCATCAGGGCCTCCTGCGGCAGGTCTGTCGTGACGACGTGCTTGCTCGGCTGCG	100	69	0R
chr1R	684.799	3909114|F|0--13:G>A	TGCAGGCTGGTGCGGGGCATCAGAGACGCCGGCGCCAAGCCTGAGGGGAAGTGGCCGGCCATCACCCGA	100	68	0R
chr1R	684.891	100038461|F|0--10:A>T	TGCAGTGGAAATTAAATGCCACATAAAATGTATTGAACATTTGTAGGCAATATGTACTTCTCATGGAAT	98.551	69	0R
chr1R	684.979	3908793|F|0--15:C>T	TGCAGATTTTCCGGTCCATTAGCTGATAGTTGGGTACCTTTGATTGATTTGACAGTGGAAGGTATGCTA	100	69	0R
chr1R	685.332	100006491|F|0--27:C>T	TGCAGTACTATATCCATGTTTGCTGTTCACGGTGAAGACCACAAAAGCAACCACCATTGATACTTGAGA	100	69	0R
chr1R	685.366	100004781|F|0--64:C>T	TGCAGTTTCCAATGAAATACGCTCCCCAGCAGGACCACCGAGGGCCAGTCCACCGCCTCTCCATCGTCC	98.551	69	1R	194.64
chr1R	685.7	100021064|F|0--50:T>A	TGCAGGTGTAGTGCTTGGAGGACTTGCATGGACATCCCTACGAGTATATGTGACCGATGTAATATAAGC	100	69	0R
chr1R	686.577	100002741|F|0--57:T>C	TGCAGTGACCAATCATCACTAGAGCTGTAGTTCCAAATCTCCAACATATTACTATTGTCTTGAGGACGA	100	69	0R
chr1R	686.917	100029562|F|0--47:T>G	TGCAGCAGACAACTGCAACAGCCACATGAATACCTGCAATCCAGCGATTCACAGGCCAAGCAATAATGA	100	69	0R
chr1R	688.069	100017743|F|0--7:G>A	TGCAGCGGAGGACCGAACCGACCCAACGAATGCATCAATTAAACCACTAGCTCAGCTCAGTTCACCTAC	100	69	0R
chr1R	688.748	100017571|F|0--53:G>A	TGCAGCGCCGGGCTCATCTCCGTGGGGCTCGCCAGGAACCTGCTCCAGGTCGCGCCCGAGGGCTCCAAC	98.551	69	0R
chr1R	688.749	100021619|F|0--34:A>G	TGCAGTGAACCTCTTGCGCTAGCTGGTTGTTTGCATTGCGACTAGATCTGGGCACTCCTCCGTGCCAGT	100	69	1R	196.91
chr1R	688.749	100037213|F|0--59:C>T	TGCAGGACGACAACATTCATGTGTTTGGAATGCATGCAACTGTACTTGTTCTTGTTGTGCGCACAACGG	98.551	69	1R	196.91
chr1R	689.021	100104613|F|0--17:A>G	TGCAGACACAAGCTGCCACTACCATTCGCTTCCCGTCTGATCGTCAGCCGCCGCTCGCTCTCTTAGATC	100	69	0R
chr1R	689.021	100104613|F|0--36:C>T	TGCAGACACAAGCTGCCACTACCATTCGCTTCCCGTCTGATCGTCAGCCGCCGCTCGCTCTCTTAGATC	100	69	0R
chr1R	689.198	100022933|F|0--49:T>G	TGCAGCTTGACAGAATGTGGAGAGAGAGGCTGTGAGAAACGAGAAAGAATAATCTTTTTTATATAATCC	98.551	69	6R	144.35
chr1R	690.973	100054619|F|0--64:C>A	TGCAGGTGCTGGGCTGCGTGCTCATGTCCCGCTATGTGGAACTGACTATGAACCGCGGCGGCGTCCCTC	98.551	69	0R
chr1R	691.651	100022180|F|0--25:T>A	TGCAGCACGGGAGACAAAACCAAACTTTATTTTCCTCCGTTCTTGTTCTAATCCTGACGGCGCCGTTGT	98.551	69	1R	202.53
chr1R	691.651	3883672|F|0--48:G>T	TGCAGCTGGTATTCGTCGATGGCGAGTTTAGCGTGGGTCACGGGACTCGGATCGTGCAGCTGTTACTGG	100	69	0R
chr1R	691.76	100108895|F|0--26:A>G	TGCAGTGGAGTAGTATACTGTAGCTTATAGGGGTGGTGACTGACCATGCTCTCAGGCTGATCCAATGCA	98.551	69	1R	203.65
chr1R	691.799	3742707|F|0--23:C>T	TGCAGGTCCGACGTCCGTGCCTCCGTGGCACTCCTCCGTCGTCCTGCCTGCATGGCCGCCCAACGCCAA	100	69	4R	127.95
chr1R	691.803	100010365|F|0--43:A>T	TGCAGGCACGTGCTTGGTACCTTGATGGTGCCTCCTATTGGTTAGCTTTGCTTTGGCAAAGCGGGGCAG	100	69	1R	202.53
chr1R	692.015	100032899|F|0--67:C>A	TGCAGGTAACGTAAGTAGTAGGAGTAGCTGATATAACACGTACGTGCCGCGCTTGAGCTTGCAGCAACA	100	69	0R
chr1R	692.546	100047764|F|0--67:G>A	TGCAGAATTAGCTAGCGACGTGCCTGCTCTACTGAAATTCATGTCGGCGGAACCACGGCGAGAAGCTGC	100	69	0R
chr1R	692.614	5219128|F|0--19:C>T	TGCAGGGGCTAGGGGTGAACCCCGCCGTGCGCGAGGTCGCCGACGAGGCCGAGCTCGCCGCGGCGGTGA	100	69	0R
chr1R	692.614	5219128|F|0--7:G>C	TGCAGGGGCTAGGGGTGAACCCCGCCGTGCGCGAGGTCGCCGACGAGGCCGAGCTCGCCGCGGCGGTGA	100	69	0R
chr1R	693.483	100007485|F|0--46:G>C	TGCAGGTGGGGTCTCTTCTCGGCCGCCATCAACCCTGCAAAACAAGGAAGCAACGGCATCAGCGGAAGG	100	69	1R	205.88
chr1R	693.89	100085307|F|0--9:C>T	TGCAGGCGGCTGTCGGCGGCGAACTCGCGCCACCCTCCCGCCGGGACCATCCGCCTGTGCCGCATCTCC	98.551	69	0R
chr1R	694.123	100009265|F|0--8:G>C	TGCAGCTTGAGCTAACAAGTTACCAAGACACATGAACTGTACAGAATCGGTGCTGCATTTTGCCCAAGC	100	69	0R
chr1R	694.123	3361623|F|0--32:C>T	TGCAGGTTATCTGACCATGCTATGGATGTTGTCGTTTGTGGTTTGGTTGTCTTACCATGCTATAGATGT	98.551	69	1R	205.88
chr1R	694.218	100076155|F|0--15:C>T	TGCAGCAAACCCCAGCACCCAATGGCAGTGGACGGCGGACCAAATGCCTCCCCAAGAGGCGCCCTCCCT	98.551	69	0R
chr1R	694.218	100076156|F|0--50:A>C	TGCAGCAAACCCCAGCACCCAATGGCAGTGGACGGCGGACCAAATGCCTCACCAAGAGGCGCCCTCCCT	100	69	0R
chr1R	694.221	100042481|F|0--33:G>T	TGCAGATTCACCTTCACCGACTGTGCAACATGCGGGTGCTGGTCAAGGACAAGATAAACGCACATGAAA	100	69	0R
chr1R	694.224	5216630|F|0--38:T>C	TGCAGCCAGTACGGCTACTGCGGCTTCGGCCAGGAGTATTGCGGCGACGGCTGCCAGGGCGGCCCCCCT	100	69	0R
chr1R	694.46	100010046|F|0--66:T>G	TGCAGGTGCAGAACCATGCAAACTAAATCATGCTGCAACTTTTGGACTCAAGTTCAAATTTCATAATCT	100	66	0R
chr1R	694.542	100055438|F|0--50:G>A	TGCAGATGCACTTTTACGGGCTTTGCGACATCATCCTGGTCAAGGGAAAGGCAAACGGACACGAACCCA	100	69	0R
chr1R	694.547	100056085|F|0--33:G>T	TGCAGCGGATTGAACCTTGAGGAACTCAAGGCAGGCCTCCTTCAGCTCGGAGCAGTGATGTTGCACAGC	100	69	1R	206.45
chr1R	694.547	100056085|F|0--6:G>T	TGCAGCGGATTGAACCTTGAGGAACTCAAGGCAGGCCTCCTTCAGCTCGGAGCAGTGATGTTGCACAGC	100	69	1R	206.45
chr1R	694.598	100079075|F|0--58:C>T	TGCAGGTGTATCTTGATCATGATGAGAGTTTCAGACAATTTGACTGGGATGATGTTGTCCAGTTTCCTG	100	69	0R
chr1R	694.758	100068596|F|0--63:G>C	TGCAGCTCGGCACGATGCTCGTCATTTACTGCTGTCGCTTCTCTGGGCCGGTCTTTGTATCGGGATCAC	100	69	0R
chr1R	694.768	100038989|F|0--12:G>A	TGCAGCCTGCCGGCTGATCCCTGCCTCCTCTCCCAATCTTCCTCCCAGCTGCATATCTCTCTCAGATGC	100	69	0R
chr1R	694.87	3736128|F|0--26:G>C	TGCAGGCACAGCTCGCCGTCGCCGTTGGCCGCCATGGCCGAGAACATCTGCCGGTACAGCGCCGACCCC	98.551	69	0R
chr1R	695.017	3744554|F|0--63:G>T	TGCAGCGCGGCCAGGACACCACACACTTCAAGGAATGCGTGGAGTTGTTGCAAAAGGCCTCAGGGATCA	100	69	0R
chr1R	695.1	3602594|F|0--20:T>C	TGCAGATGTTTAGCAGCTCCTGCGGTGGGTTTTTGGGCTGTTAGCCCCAATTCAGCTTGGCGTGCGGCG	100	69	0R
chr1R	695.656	100158661|F|0--13:G>A	TGCAGTGGACACGGTGGTGGTTTTCCCGGCGCTCGAACGCCCGCCGCACGAACGGCAAATTATCTCCCG	100	69	0R
chr1R	695.81	3597084|F|0--28:A>G	TGCAGACCCCATTTTTATTTTTTTGTCTATTTCGTGTCTGTTTCACCCCATCCCTGGACCAAAGTTGGT	100	69	0R
chr1R	695.81	3597084|F|0--51:C>T	TGCAGACCCCATTTTTATTTTTTTGTCTATTTCGTGTCTGTTTCACCCCATCCCTGGACCAAAGTTGGT	100	69	0R
chr1R	695.963	100028257|F|0--62:C>T	TGCAGTTTTACTAGAAAAGCAGCAGCAAGCACCGAGCAGTAGTGCAGTACAAGAGCCGTATACATTCCA	100	69	1R	207.56
chr1R	696.056	100077415|F|0--41:C>T	TGCAGCAGGCCGTAGTCCTGCGCCATCAGGTGCTCCATCCGCAGCGGATCGGCACCACTGCTGCTGCTG	100	69	1R	207.56
chr1R	696.056	100137749|F|0--5:C>A	TGCAGCAGGCCGTAGTCCTGCGCCATCAGGTGCTCCATCCGCAGCGGATCGGCACCACTGCTGCTGCTG	100	69	1R	207.56
chr1R	696.056	3744693|F|0--41:T>C	TGCAGCAGGCCGTAGTCCTGCGCCATCAGGTGCTCCATCCGTAGCGGATCGGCACCACTGCTGCTGCTG	98.551	69	0R
chr1R	696.112	100021599|F|0--48:C>A	TGCAGTCTTACCAGAAAAGCAGCAGCGAGCAGTAGTGCAGTACAACAGCCGTATACATTCCACTGTAAC	100	69	1R	207.56
chr1R	696.192	5222155|F|0--41:G>A	TGCAGCAGGCTCGTCGGCGGCGGCGGCGCCGTCGAGCAGGAGCAGACCAAGGCACTGGTAGGGCCACAT	100	69	0R
chr1R	696.192	100085785|F|0--10:G>C	TGCAGGTGGTGGTAGCTCCATCGGCATGTCCAACTTTCGGGTCGTCGCCGTGGTCTACGAAAGCGATGT	98.551	69	0R
chr1R	696.479	100018670|F|0--65:C>T	TGCAGGTTATAATGGCCGCACTTCGCTTGGTCATTGTGTTCGTCAACGCGTTCGTAACCGCGTGGCCTC	100	69	0R
chr1R	696.882	100079009|F|0--55:C>G	TGCAGTTGTACCAGCAAAGGCAATACTGCTGGCCCCGACATTTTCCCTAATGGAACGGAGTACTCCATG	98.551	69	0R
chr1R	696.886	100031396|F|0--51:T>C	TGCAGACGGGAGGAAGAAGACGAATCCTGTTCCCACGATCCATCTAAGCCCTCGTTCAATTAACTACGC	98.551	69	0R
chr1R	697.173	100003873|F|0--27:C>G	TGCAGGAGCTTCAGAAGAGATAGATACCGAGGTCAACAGGTGAGCTTTCGAGGAAGCTGAATTTTCTGG	98.551	69	1R	209.83
chr1R	697.523	100009312|F|0--37:T>A	TGCAGCGCTCAGTTCTCCTAGGCAATCAACATATGGTTTCATGCATCATTCTTTCTGTATCGTTCGTAG	100	69	0R
chr1R	697.538	100016960|F|0--12:T>C	TGCAGGGAGGAATGCGCATGCTACTAATCGCTTCACTTATTCTGCGGCACATTACCGACAGCTCTTCAA	98.551	69	1R	210.39
chr1R	697.538	100016960|F|0--38:A>C	TGCAGGGAGGAATGCGCATGCTACTAATCGCTTCACTTATTCTGCGGCACATTACCGACAGCTCTTCAA	98.551	69	1R	210.39
chr1R	697.764	100077007|F|0--11:C>T	TGCAGATTTCACTAGCTTGCCTGGGTCCTGATGATTCGCTGGTTTCCCAAATGAGCTGGCTCGACGCGC	100	69	1R	212.66
chr1R	697.801	100016980|F|0--28:C>A	TGCAGGCTCACCGATACTGTATGCAATGCAGCACAAATTCTCACGTACCGTTCTTGGAACAAAGAGCAC	100	69	0R
chr1R	697.804	100002249|F|0--28:T>C	TGCAGCCTCCATCATTCTCTTCTTCCCCTAAATCTCCATGTTTGGAGCTCTCGTCTTCAGACCCCACTT	100	69	1R	210.39
chr1R	697.805	3591547|F|0--40:C>A	TGCAGCGGCAATCAATCATCATGGCGGTAATGCAATCTGGCTGCTGCTGTTGGCGATGAGGATGATGGA	98.551	69	0R
chr1R	697.83	5201319|F|0--54:C>T	TGCAGAACTGATATTCAGCAAGCGAGTTCAGAGATCACAGTCACTTCATCTCTACTACTGGTTCCCAAC	100	69	0R
chr1R	699.189	100035105|F|0--18:T>C	TGCAGCGTGGAGTTCTACTAACTTACATATAACACAAGACAGGAAGGAGAGAAACAGCAAATAAACATA	100	69	0R
chr1R	699.627	100062027|F|0--65:G>A	TGCAGGGCTTTGAGCTCCACGACGACGACCACATGCTCGCCGGTAACCCCGCCGTGCACTCCACTGCTG	100	69	0R
chr1R	699.693	100063430|F|0--68:G>T	TGCAGAGCTTTGAGCTCCACGACGACGACGACATGCTCGTCGGTAACCCCGCCGTGCACTCCACTGCTG	100	69	0R
chr1R	699.693	100063430|F|0--5:A>G	TGCAGAGCTTTGAGCTCCACGACGACGACGACATGCTCGTCGGTAACCCCGCCGTGCACTCCACTGCTG	100	69	0R
chr1R	699.965	100037464|F|0--42:T>C	TGCAGGCGCTTCGCACAGGCGAGCGACCGAGCAGAGACGCAATGGGCGGCCCGTTTAACCGTTCCAACG	100	69	0R
chr1R	700.063	5216145|F|0--65:G>T	TGCAGGATCCTGGGAGACGTCTTCATGGGCCCCTACCACACCGTCTTCGACTACGGGAAGCTGCGGGTC	100	69	0R
chr1R	701.393	100029844|F|0--45:C>A	TGCAGCCGCCAGACAGCCAGACCTTGGACGCGGGAGATCACCGAGCACCGCCCATGCGGCAGCTCCAGG	98.551	69	1R	214.92
chr1R	701.507	5226345|F|0--26:C>G	TGCAGCCTCTTCAACCCGACGCCGTCCCTCTCCGCCATGATCGTCAACAGGTACAGGCTCAGGGGCAAC	100	69	0R
chr1R	701.82	3909835|F|0--60:G>A	TGCAGTAGTCACTCGTCCCTTAAGACAAGATATATAAAATCGTTGAAGCAGCATTGGTTGGAGTATCAC	100	69	0R
chr1R	702.089	100123640|F|0--28:T>C	TGCAGAGGAGAAGGCCGGCGCAGACCTGTCGGACAGAAATAAGGCGGTACGTTTTGCGCAAGAAAGGGA	100	69	0R
chr1R	702.155	3350213|F|0--40:G>A	TGCAGAGGAGAAGACCTTCGCACAATTGTTCGACAAGAACGTTTTCGTACATCTGCCGCAAGAAAGGGA	98.551	69	0R
chr1R	702.159	100080624|F|0--42:G>A	TGCAGAGGAGAAGGCCGGCGCAGACCTGCCAGACAGAAATGAGGCGGTACGTTTCGCGCAAGAAAGGGA	100	69	0R
chr1R	702.159	100080624|F|0--54:C>T	TGCAGAGGAGAAGGCCGGCGCAGACCTGCCAGACAGAAATGAGGCGGTACGTTTCGCGCAAGAAAGGGA	100	69	0R
chr1R	702.159	100123641|F|0--42:G>A	TGCAGAGGAGAAGGCCGGCGCAGACCTGCCAGACAGAAATGAGGCGGTACGTTTTGCGCAAGAAAGGGA	98.551	69	0R
chr1R	702.159	100035101|F|0--39:A>G	TGCAGCTGCTCGAATTCTTCGCAACAGCAAAACTTCTGGAACTTGGATTCTTCGCTACACGAAAGCTGT	100	69	0R
chr1R	702.159	3363366|F|0--39:G>A	TGCAGCTGCTCGAATTCTTCGCAACAGCAAAACTTCTGGGACTTGGATTCTTCGCTACACGAAAGCTGT	98.551	69	0R
chr1R	702.171	3595856|F|0--55:C>T	TGCAGGCCGACGAGCTCGCCACCGTGCGCCTCTTCAAGGACAACACCCCCTCCGTCGTCTACATCACCA	100	69	0R
chr1R	702.491	100169230|F|0--17:T>C	TGCAGCAGCTCGGGGTCTAGCCGGTCGCCGAGGCGCTCGCAGATGTTGTGGAGCGCGCAGCACACCTCG	100	69	0R
chr1R	702.492	5215127|F|0--58:C>G	TGCAGGGGAACAACAAGAGGGGGGCGGAGTGGATGGAAGAGGGGTCCGAGAGGCTGCGCAGGCCGTGGG	100	69	0R
chr1R	702.88	100169231|F|0--22:G>A	TGCAGCAGCTCGGGGTCCAGCGGGTCCCCGAGGCGCTCGCAGATGTTGTGGAGCGCGCAGCACACCTCG	98.551	69	0R
chr1R	703.185	100038620|F|0--58:T>G	TGCAGCATGCCCTCCAAACCCATCACACTAGCCTCCTCCACCCTCTCCAGCGGCACGGTCACTGGCTCA	100	69	0R
chr1R	703.569	100037746|F|0--59:G>A	TGCAGCACTTGGAGACTCTGGATTTGAGATACTGTTTGTCACTTCTCAGACTGCCATCAGCCGTGACGC	100	69	0R
chr1R	703.909	100032478|F|0--17:A>C	TGCAGCCAATGCCCCCCAAAAAAAACCGTCAGAAATTCAGAATCACGGCCAACCCAGCAGCAAGTCTGG	98.551	69	0R
chr1R	704.029	3744968|F|0--56:G>C	TGCAGGTGACCCGCGCGGGGCCGTGGTCCCACCTCTCGCCCGGGCCGGATTCGTGGGGCCGAGGCGGCC	98.551	69	0R
chr1R	704.441	3742237|F|0--40:G>C	TGCAGGTGACAGACCTGAAAATGGAATGGAGCACCGCCTTGCCCGTCTTCCTCGCCGCCGCCCTACGCT	98.529	68	0R
chr1R	704.441	3742237|F|0--68:T>C	TGCAGGTGACAGACCTGAAAATGGAATGGAGCACCGCCTTGCCCGTCTTCCTCGCCGCCGCCCTACGCT	98.529	68	0R
chr1R	705.128	100046747|F|0--68:A>G	TGCAGGCATTTGCGGGCTAAACTATCATGGGCGTCGCTGTCCGTTTATCGTTACGCTCACACGTCGGGA	100	69	0R
chr1R	705.488	100064308|F|0--38:C>G	TGCAGGATCTTGGCCGCCCTGCTCCGCGCGAGGGGGCTCCCGAGCAGCGACACCTCGAGGAGCGCCTGC	100	69	1R	219.96
chr1R	705.578	100003147|F|0--44:C>T	TGCAGCTTCGGCCACCTCAAGAACTTGGAACCCAACAAAACGGGCCACGTGGATCCCATCCTCCCAATC	98.551	69	0R
chr1R	705.938	3742455|F|0--23:C>G	TGCAGAAAAATATATTACAGGTACAAACTAAACTTCTCAAGGATCATGCACGGCGACTCATTGAAACTA	98.551	69	0R
chr1R	706.692	100051702|F|0--52:C>G	TGCAGTTGACGACGAGCACGCCGATGTCCTTGGGCTTCACCCCCGTCTTGGCCAACAGCTGGTCCAGCG	100	69	0R
chr1R	706.953	100054669|F|0--9:A>G	TGCAGCGGCACAGCCACTGCCTGATGACGATGACGATCTGATCGAGTAGAGAGAGGATCATGAGTCTGT	100	69	0R
chr1R	706.962	3351951|F|0--28:C>G	TGCAGATCTATCTACAGTGGTAGCAGAGCGGATGATGAGATTGAGGGGGCTTACGTTGGGGCAGTGCCT	100	69	0R
chr1R	707.635	100009613|F|0--7:C>T	TGCAGTTCGAGGTGTTCAGCCAGGGCATGTTCAAGACGGAGCTGTGCAACAAGTGGGAGGAGACCGAGA	100	66	0R
chr1R	707.799	100003418|F|0--10:T>G	TGCAGAGAATTAACTTCTTGTCATCACTTTCATCTTTAGTACTGTAACTAGCATGACGATTAGTTACCG	100	69	0R
chr1R	707.814	5224482|F|0--29:C>G	TGCAGATGGGGACCAAGTTCGAGGTGCTCCAGGCGGACTTGGCGCGGTCGCGGTGGGCGAGGCTGAGGA	100	69	0R
chr1R	707.881	3732399|F|0--20:C>T	TGCAGCTCAGTGACGTCGGTCTCCTGCTCCTTGAGGCCATAGTACTCGAGCAGCTCGCCCTCGAGCTTC	100	69	0R
chr1R	707.949	100042837|F|0--39:C>G	TGCAGCCCAAGCTCATCGCCTGCGGCAAATCCGCCGCGGCGTCCACCATGGCCGTCCGCTTCCTGCTCG	100	69	0R
chr1R	708.452	100077096|F|0--67:C>G	TGCAGTTGGCTTCAGACTGACTAAGCCGAGATCCCCTTCCGCCGCGACGACGGCGATGGACGCGGCGCC	100	69	1R	222.8
chr1R	708.522	100005839|F|0--23:A>C	TGCAGCTCGATGCCGCACTATCAATGTTCTACATCGTCCTTGCCATCTTCCTAGTGGTGCATGTTCGTG	100	69	0R
chr1R	708.628	5040808|F|0--53:C>A	TGCAGCGTGTCGTTCGAGGAGGCCGCCGCTGGGAGCACCCTTGCGTTGACGGCCGGGGAGACGACGCCG	100	69	0R
chr1R	708.628	100015967|F|0--55:G>C	TGCAGCGCGGCATCGTCGCCACCAACCAGACCGCGCAAAGCGTGACGTCCACGCTGCACATCATCTCAG	100	69	1R	222.8
chr1R	709.41	100008734|F|0--16:T>C	TGCAGATCATTAATAATGACGAGGCAATCATTTTCACACAGAAATTTGCAACACTCTTGGGTTAATCCC	100	69	1R	223.35
chr1R	709.721	100074476|F|0--26:G>C	TGCAGCGACGTAAACATACATAATGTGAACTGTGGACCAGGCCATGGGATCAGCATTGGTGGCCTAGGA	100	69	0R
chr1R	709.8	100060210|F|0--57:G>T	TGCAGGAGCGGCGAAAGCAGACGGAAAAGCGGCTGGAAACAGAATTACAGCCAGCCTGGCATCTACGCT	100	69	0R
chr1R	710.003	100034130|F|0--59:G>A	TGCAGTTTTTGGTGATAGTGGAGCTACCGCTAAAAGCAGTAGTTGCAGTCTTTAGTGATGGGTACAGCT	100	69	0R
chr1R	710.035	5216973|F|0--22:T>C	TGCAGAATGGGGGCGACGGTGATCACACGAGTCTCTGCGACGGCATAAGGCGGTTTGTGTGGGAGGCGG	100	69	0R
chr1R	710.412	100021404|F|0--22:G>T	TGCAGACAGACAGAAACAGGGGGCCTGGCGTCAGTCTTATTTCAGTATTCAATGTAAGTAGCATATACA	100	69	1R	225.05
chr1R	710.441	3349231|F|0--7:G>A	TGCAGCAGCCAAGCTGGTCAAAGGCTGGCTCCCCAGCTATTGCAGCCTGGCGATTCTGCTAGCTTGCTT	100	69	1R	225.05
chr1R	710.994	100065669|F|0--61:G>A	TGCAGAAACAATGAAGAAAAAAAGAGACGTGGACTTTGGTGACCCGATCGACACGCGTGAAGTACCTTG	98.551	69	0R
chr1R	710.994	100074948|F|0--18:T>C	TGCAGAAGCAGCGGAGGATGAGGCAGACCTAGCCCGGTCGACCTGGAAGAGCCTTGGGAAGAGACGGCG	100	69	0R
chr1R	710.994	100074948|F|0--23:C>T	TGCAGAAGCAGCGGAGGATGAGGCAGACCTAGCCCGGTCGACCTGGAAGAGCCTTGGGAAGAGACGGCG	100	69	0R
chr1R	711.698	3897254|F|0--16:G>A	TGCAGAAGCCCTCGACGACCACATCCTGGTCCGTGAGCACCACCACGAGGGCGCCTTTCTTGGGTAGTG	100	69	0R
chr1R	712.137	100016453|F|0--58:C>G	TGCAGCTGTCATACCGAGTATTTGAGATCACAAACGTGCTGAGGGCAGCCTTCATTCCCAGCAGAGACA	100	69	0R
chr1R	712.221	100004448|F|0--23:A>G	TGCAGATCAAGGGCAGAGCACACAACCCCATAGCTCCCCTTGCCAATCACCTCCTGGATCTTGTACCGA	100	68	0R
chr1R	712.256	100137163|F|0--63:T>G	TGCAGACGGCGGTGGTTGGGCAGCGGGCAGGCGAAGGCTACACTGGACATAGTCATGGGCATATGTGTT	100	69	0R
chr1R	712.264	100011387|F|0--48:T>A	TGCAGGTAGACATTTGATTTTGTACACCTCCATTTCCGCACATGTTTGTCATAACACTTTGGATATGGC	100	69	0R
chr1R	712.273	100020897|F|0--41:C>T	TGCAGTTGCGCATGGTCCATGAACAAGCAACTATAGTTGCACCCCAGTGTGCGGGCAACTAGTTACACG	98.551	69	0R
chr1R	712.293	3592113|F|0--33:C>T	TGCAGCGCCTCCAGCTCGCCGCGCTGGCGCGCGCTGATGAGCCCCGTGAAGTAGGCCGAGTCGGCGTGC	98.551	69	0R
chr1R	712.402	5203741|F|0--22:G>C	TGCAGGGGCTCCTCGACCCCGCGGAGCTCGCCAGGCACCTGGACGCGCCCCCGTGCTACCCGACGATGA	98.529	68	0R
chr1R	712.538	100183034|F|0--7:C>T	TGCAGAGCGGGCAGGTGCTCTTCTTCTCCATCCACAGCGCGAGGCAGCGCCGGTGGAACACGTGCCGAG	100	67	0R
chr1R	712.563	100057248|F|0--65:A>C	TGCAGAGCGGGCAGGTGTTTCTGCTCTTGATCCACGGCGCGAGGCAGCCCCAGTGGAACACGTGCAGGC	98.551	69	0R
chr1R	712.631	100041495|F|0--57:A>T	TGCAGCAGCTAGCGTTCGAACTCGTGGAGCTCCTTGTCATGTCTGTGTTCCCAGAGCAGGACGACACGG	100	69	0R
chr1R	712.631	3909720|F|0--29:C>T	TGCAGCAGCTAGCGTTCGAACTCGTGGAGCTCCTTGTCATGTCTGTGTTCCCAGAGCAGGACGACACGG	100	69	0R
chr1R	713.073	3885994|F|0--32:C>A	TGCAGAATGAAGCAGCAGTTGGTCAGACTCAGCCATGGAGCAGAGCAGGGGTGGGAAGAAATGATGTTC	100	69	0R
chr1R	713.073	3885994|F|0--58:A>G	TGCAGAATGAAGCAGCAGTTGGTCAGACTCAGCCATGGAGCAGAGCAGGGGTGGGAAGAAATGATGTTC	100	69	0R
chr1R	713.073	5046858|F|0--22:C>G	TGCAGTCGCTTGCCAAGGCTCTCTCGCACTACTACAAGGCCCGGCTGCTGCTCCTCGACGTCACCGACT	100	69	0R
chr1R	715.092	100099108|F|0--55:G>C	TGCAGGGCCTTGACGAAGCTCTTGCTGCGCTCCATGGAGGCCTCGTCGACGGTGGGCCCCTCCCAGCCC	98.551	69	1R	230.18
chr1R	715.508	100126717|F|0--46:G>C	TGCAGGGCCTAGGGTCCCGCTGCCGCTGGTACGGTGGAGCCTCCGCGGCGGCGGCCGGCCCGCCGTCGA	98.551	69	0R
chr1R	715.965	4105285|F|0--8:G>C	TGCAGGGGGACAACATGAGCAAGAACATCCGCGCCGGCGAGAGGCCGCTGTTCCCGTTCCAGGCGCCCA	100	69	0R
chr1R	715.965	100013980|F|0--19:A>G	TGCAGAAGAAGCTCCCGGCATGGCAGCGGCGGCAAGGGGACGCGGCGCCCCGCGTGTCGGACGTGCCGT	100	69	0R
chr1R	716.131	100031239|F|0--6:A>C	TGCAGAAAAAGATTACACCGTCTTTCATCATTCGGTCCTGATCAGCCGGCCTACATATGTCATGCCCGA	100	68	0R
chr1R	716.131	3748424|F|0--14:A>G	TGCAGAAAAAGATTACACCGTCTTTCATCATTCGGTCCTGATCAGCCGGCCTACATATGTCATGCCCGA	100	68	0R
chr1R	716.34	3595732|F|0--20:A>G	TGCAGGCGAGGGCCTCTTTCAACTCGTTATAAGCGAGGTATACATCGGTTCTAGCGAGGCCGAGTACCA	100	69	0R
chr1R	716.372	100049573|F|0--28:C>T	TGCAGCTGCCTCCTGGGAAATGCACATCCCCGAAGCAGAATCAGGTTCAGTGTGGCTCCTGCTCAGAGG	100	69	0R
chr1R	716.372	3739273|F|0--14:G>A	TGCAGAAGCTGGTTGCAGGAGCTGCACACGACGAACGGCGCGCCGCCCTTCGTCGGCCGGCAGAAGCTG	100	69	0R
chr1R	716.564	100006290|F|0--51:G>C	TGCAGGTCTTGCGTGACTGACTGATACTTGAGCTGTAATAACTTGTGTTCGGTCAGGGCTCGAGCTTTT	100	69	0R
chr1R	716.658	3745518|F|0--46:G>A	TGCAGCAGCGTCTTGCTGCGATCGGCAAGGCATTTTGCTGGAACCGGCACGTCGGGGAGCTGGAACGCG	98.551	69	0R
chr1R	717.143	5043182|F|0--10:T>C	TGCAGATCTTTGCCAATGTACAAAAGAAAAGTTGTCGATCTTATACCATCAGGGCGGGGTTGCCGTTTG	100	69	0R
chr1R	717.297	3729828|F|0--19:G>T	TGCAGCTCTTCTCCCAGGTGAGTGAGTGTCCACCGTCGACAACCGCAATCACGCATGGGCTCGCCGATA	100	69	0R
chr1R	717.297	4095655|F|0--37:C>T	TGCAGCGCGAGGCCGACGATGGCGAGGACGCAGCCGGCGGCGTGGAGCGCGGGCGCGAGGAACTCGACG	100	69	0R
chr1R	717.298	100054316|F|0--50:G>A	TGCAGCAGCTGCGCGCGGCCGTCGGCGCGCTCGTACACCTGGCACGAGCTGAGCACGGAGCCCAGGATC	100	69	1R	233.56
chr1R	717.298	3602385|F|0--50:A>G	TGCAGCAGCTGCGCGCGGCCGTCGGCGCGCTCGTACACCTGGCACGAGCTAAGCACGGAGCCCAGGATC	98.551	69	0R
chr1R	717.441	3734104|F|0--35:G>A	TGCAGCACCTGGTCCAGTTGCCCACACGCTGCGGCGATTAGTCCTGTAGGCAAAGTGTGGATGTTTGAG	100	69	0R
chr1R	717.518	100029547|F|0--34:T>C	TGCAGTATGTCCCTCGCATCCCAGGCATGCATCTTTTTGTCGTCGGCAGAGACAGGATAACCAAAACTA	100	69	1R	234.13
chr1R	717.518	3363104|F|0--34:C>T	TGCAGTATGTCCCTCGCATCCCAGGCATGCATCTCTTTGTCGTCGGCAGAGACAGGATAACCAAAACTA	98.551	69	0R
chr1R	717.522	3900493|F|0--11:T>C	TGCAGTTCAGGTTTCAATGACAAGCACTGTTTTCATGAAGAAAAACACATGCACGTGGGCCCACTCACG	100	69	0R
chr1R	717.579	100067293|F|0--22:T>C	TGCAGTCCCGAAATGTAAGATGTTTTTTGGCACTAGCCTAGTGTCAAAAAACGTCTTACATTTCAGGAC	98.551	69	0R
chr1R	717.874	100039168|F|0--67:G>T	TGCAGCTGCGAATGGTAGAGGCAGCTCGTTAGATGTGCTCCCTTCCTCGGGCCGAAGATTAGAAGAAGA	98.551	69	0R
chr1R	717.954	3345331|F|0--44:C>T	TGCAGCTGCAACACTGACTGGGTTGCCTCCTTTCTTCATCGTGACCACCACCTCCATTCAGTCCGAATC	100	69	0R
chr1R	718.422	5213835|F|0--7:G>A	TGCAGTCGATGTCCTCTACGACGAGGATGGAGCGGTTGCTCATGCCGACGAGCAGCCTGCGGAGGTCCG	100	69	0R
chr1R	718.456	3578819|F|0--17:C>G	TGCAGCAAAGAAGAAGGCAGAAGACAAGGTAACATTGTCTGGGCTGCTCAATTTTGTTGATGGCTTGTG	100	69	1R	238.76
chr1R	718.456	100064993|F|0--56:T>C	TGCAGAGTTGGACTTGGAGTGCTCCTCATCGTCTTCCTCCCGCTGCTTCAGCTCGATGGTGCAGTCAAT	98.551	69	1R	238.19
chr1R	718.456	100064993|F|0--63:G>A	TGCAGAGTTGGACTTGGAGTGCTCCTCATCGTCTTCCTCCCGCTGCTTCAGCTCGATGGTGCAGTCAAT	98.551	69	1R	238.19
chr1R	718.457	3588597|F|0--31:G>T	TGCAGGCGTCACCGTCACCTCCTCGATCAGCGCCTCGATCTCTGGATAGGTGGCATGGTAGTCGACGGA	100	69	0R
chr1R	718.461	100164643|F|0--9:C>T	TGCAGGCGTCACCGTCACCTCCTTGATCAGCTTCTCGATCACTGGATAGGTGGCATGGTCGTCGATGGA	100	69	0R
chr1R	718.473	100104285|F|0--66:G>T	TGCAGGCGTCACCGTCACCTCCTCGATCAGCGCCTCAATCTCCGGATAGGTGACATGGTGGTCAATGGA	100	69	0R
chr1R	718.473	3365307|F|0--36:A>G	TGCAGGCGTCACCGTCACCTCCTCGATCAGCGCCTCAATCTCCGGATAGGTGACATGGTGGTCAATGGA	100	69	0R
chr1R	719.499	3896870|F|0--9:G>C	TGCAGCCGCGGCCCGACAGTACTGTTCGACAGGCGAGATAGGTAAGCCACAAGTCCACGACCACGCGCG	100	69	0R
chr1R	720.419	100017281|F|0--49:T>C	TGCAGCCTTGGGCTCCGCGCGCTGCGCTCGCCCCGGCCGCCCTGGCCTCTGCCTGCACCGCGCTCGTCT	100	69	0R
chr1R	720.455	100010421|F|0--39:A>C	TGCAGCCTCAAACTCTCATGCTGTACGTCTTGCAAACCAATTTTCTGTCACCATAGCTCGCCATTTCCA	98.551	69	1R	243.24
chr1R	720.568	100030934|F|0--21:C>T	TGCAGGAATTACCATGCAGGGCCAATATATGAGCCCCACATGTCCTTGTGCACCCCTAGCTCGAATTAA	100	69	0R
chr1R	720.912	100157234|F|0--13:A>G	TGCAGCCGTCCTCATACGACATCTTCACTTTCGCCCCGGTGATGCCGGTGGCTGGTGGTGCCGCCCGAG	100	67	0R
chr1R	720.937	100095975|F|0--46:G>C	TGCAGCTCGCCACATCGCCGGCGGTGTGCTCCTCGACGCAACCACCGCAGATCGGCGCGCGCCCAATTC	98.551	69	0R
chr1R	720.937	3596389|F|0--46:C>G	TGCAGCTCGCCACATCGCCGGCGGTGTGCTCCTCGACGCAACCACCCCAGATCGGCGCGCGCCCAATTC	100	69	0R
chr1R	722.127	100031334|F|0--52:T>G	TGCAGTGACCTATCTGCATTTCTACGACTGCCCCAAGTTCTCGGTAAGCCCATGCCTTGTACATACATA	100	69	0R
chr1R	722.127	3597619|F|0--52:G>T	TGCAGTGACCTATCTGCATTTCTACGACTGCCCCAAGTTCTCGGTAAGCCCAGGCCTTGTACATACATA	98.551	69	0R
chr1R	722.464	100012069|F|0--51:G>C	TGCAGGTCAAAAGAGATTATATCAACTCCTGTCAAACAAACAGGAAATTAAGGAAGAAATATATCAAGT	100	69	0R
chr1R	722.464	100033132|F|0--21:T>C	TGCAGGATGCGTTAGCGAAGGTGGGGAAGAATTCTAATGATATTGGTGAGCATGAAATGCATGTACTCG	100	69	1R	245.52
chr1R	722.613	100029515|F|0--22:T>C	TGCAGGCTTTAAACAGTAAGGCTGTGGCATATGCTACAAGGAAATCAGCATGTACGAGCAGTTTAATTA	100	69	0R
chr1R	722.618	3908535|F|0--34:C>A	TGCAGTCTTGTGTGGTTCACTAGCTAGATGCCATCGTTTTTCCCTTTTATTATTATTATTGTTATGCCG	100	69	0R
chr1R	722.618	100022455|F|0--26:G>C	TGCAGCTGATGAAACAGCTTCCTGAAGGCATTATCGATTTGCCGCCGCATTGAGACACATATCAGCTCT	100	69	1R	246.67
chr1R	722.991	3743893|F|0--58:G>A	TGCAGATATGTTTGCCTTTCTCGTTGAATGATTTTGCTCTACCATTAGGCGGACCATCGGGGTTCCCCT	100	69	0R
chr1R	723.091	100009214|F|0--22:C>T	TGCAGGATGACTTGACGATGGACGACTGGAAACTTGTGATGAAGCTGAAGAAGATACTGAGCATTCCAT	100	69	0R
chr1R	723.201	100065404|F|0--50:C>T	TGCAGCACTCCCCTCTGCATCAGCGAGATCCACGAGCATCGGTGCGACGGCGAGACGCCAGTTGCCGAA	98.551	69	0R
chr1R	723.96	3746197|F|0--31:G>C	TGCAGTCCAACATCTTCATCGAGGGCGTCTCGCACAAGATCCGCCGGCAGATCGAGGACCTGGAGCGCG	98.551	69	0R
chr1R	723.971	100182999|F|0--6:C>G	TGCAGACGACGGACAAATCACGACACTGGGCAGAGTTCAAGATCGACTCGACTGTGGCCTCGCTTTAGA	100	69	0R
chr1R	724.013	100070377|F|0--10:G>A	TGCAGGTGACGCCGCTCCACCGGCAGCAGTTGTGAGCACCTTGCTGCCATGAGACGAGGCGATTCTCCG	100	69	0R
chr1R	724.019	100049841|F|0--20:T>C	TGCAGGTGATGCCGGTCCACTGGCAGCAATTATGTGCGCCTTGCTGCCATGAGACGAGACGATTGTCCG	100	69	0R
chr1R	724.036	5210081|F|0--56:C>T	TGCAGGCCTGCGACCGAATCCGATGGCGGCGTCTCTCCGTGCGGCGGCGGCGGCGGCGGTGACCAGGAC	98.551	69	0R
chr1R	724.071	100011330|F|0--59:T>G	TGCAGAATGCCGTTGTATTCCTTGCAGAACTCGCTCAGTTCAGGATGTATTATCGGACATACGTAAGTG	98.551	69	1R	247.82
chr1R	724.071	100075060|F|0--25:A>C	TGCAGAATGCCGTTGTATTCCTTGCAGAACTCGCTCAGTTCAGGATGTATTATCGGACATACGTAAGTG	98.551	69	1R	247.82
chr1R	724.702	3595636|F|0--32:T>G	TGCAGCGCCGACTTGTCGAGCACCTGGTCGTCTGCCAGCGACCCCGGCCAGCCGATGCAGACGTCGGTG	98.551	69	0R
chr1R	724.702	100072490|F|0--34:G>C	TGCAGAAGCGCACCGAGGTGAAGCTCCAGGACCTGCCCGTGGTGCTCGGCGCCTGCTGCGTGCTCCACA	98.551	69	1R	247.82
chr1R	724.709	3593736|F|0--26:C>G	TGCAGGAGCGTCTTCGCCCTCGACTCCCCGCCGCTCTGGGGGCTCGAGTCCGTCTGCGGCCGCCGCCCG	98.551	69	0R
chr1R	724.709	5210247|F|0--51:A>G	TGCAGGAGCGTCTTCGCCCTCGACTCGCCGCCGCTCTGGGGGCTCGAGTCCATCTGCGGCCGCCGCCCG	98.551	69	0R
chr1R	725.005	100019239|F|0--45:C>T	TGCAGGAGAAACACTCTCCGGTGAGCTCCCTCCGCCACCGCCTCCCGGCTCTGTCGCCGGCGCTCCCAT	100	69	0R
chr1R	725.286	3741577|F|0--23:A>G	TGCAGGAGGAGCAAGTAGCGCCGATCCTTCTTGTGGGGAACATCGTGGTTGCTACTAACAAGGCCATGG	100	69	1R	247.82
chr1R	725.58	3883410|F|0--6:C>T	TGCAGGCGACGAGTCGGAGTGGGGCTCTGCTGACTGCTGCCGAGGTCGAGGATCAGCAGCCATGGCGTT	98.551	69	0R
chr1R	726.001	100013123|F|0--52:G>A	TGCAGGACACAACATAGCGAAATCATCTTCAGAATCAACACAACACATCTTTGCCTCGCCGTCCGTGGA	100	69	0R
chr1R	726.142	100035974|F|0--15:C>T	TGCAGTTTACCTCTCCTCTGGCTGTACTCAATGATGTAACTTGCCATTTGGGCCTTTGAGTGATATATA	100	69	0R
chr1R	726.425	100044517|F|0--38:C>G	TGCAGCATGGGGATCTTGACGTCCAGCAGCTCGGATATCGTCTCCTCGATGGCCGACTTCTCCATGAGC	100	69	1R	248.37
chr1R	726.553	100034161|F|0--55:C>T	TGCAGCGCCTCGACCTCTCCGCCTTGCCCGCGCTCCAGGTGCTCGACCTCTACGACAACGACCTCGCCG	98.551	69	1R	248.37
chr1R	726.553	3742601|F|0--57:A>G	TGCAGGCCGCAGCTGGCGAGATCAAGGTGGACGAGGCTGGCGAGCCGTCCGAGCTCGACGGGAATGCCG	100	69	0R
chr1R	726.554	3744357|F|0--6:G>A	TGCAGAGCAACTACCTTACCGGCCATCTTCCAGAGGACGACAGCATCCCGGCGAAGGAAAGAAACATGC	100	69	0R
chr1R	726.554	3908706|F|0--58:T>G	TGCAGACGCTTCTCCTGAGCGGCAACCAGCTCGCCGGCGGCATCCCGCGTGAGGTCGGTCAGCTGAAGC	100	69	0R
chr1R	726.554	3742647|F|0--19:C>T	TGCAGCGACGAGAAGCTGCCGATGGACGCCGGCAGTGATCCGTTGAACCTGTTGCCCGACAGGTTCAGC	100	69	0R
chr1R	727.115	100002796|F|0--13:C>G	TGCAGCATTCTACCAAGTACGGAAACCAAGAAAGTTTTCTTGCCAAAAAGTTCAGAGTAATACCGAGAT	100	65	0R
chr1R	727.15	100018448|F|0--39:T>C	TGCAGCTCGGTCTAGCCAAAGTTATGCACGCTGTTTATCTCTACTTTGTGTGTGAATGTCCCTGAAACA	100	69	0R
chr2R	0.412305	3744212|F|0--55:G>C	TGCAGAGCGGCCTGGACCACGTCAAGACGATCCAGTTTGCCATCGAGAAGAAGCTGAATGAGGGCGTCA	98.551	69	0R
chr2R	1.13086	100034706|F|0--16:C>T	TGCAGCGATGATCTCGCGCACATTGTTTAATGAGCTCAGATAGGCACGTTAAGATTATATTCTGCTCAT	98.551	69	0R
chr2R	1.46817	100155309|F|0--21:C>T	TGCAGTTTTGCTTGGAGCTGACGCCGCTGTCACGTGCTGAGCCGCCGCTAATTCTAATTGAAGATCGGA	100	68	0R
chr2R	1.54832	100011767|F|0--21:T>C	TGCAGTTTTGCTTGGAGCTGATGCCGCTGTCACGTGCTGAGCCGCCGCTAATTCTACTTGAAGATCGGG	98.551	69	0R
chr2R	1.54919	100165275|F|0--9:C>A	TGCAGAAATCGGTGAAGCGGCAAAAACAAAAACCCAGTGCACATGTGTACGTACAAGGGAGAATACATT	100	69	0R
chr2R	1.54919	100177762|F|0--5:C>T	TGCAGCGCGCATAGTTGGGTGAAGATCCGTGGCGGCTTGAGGCATATGCGGGGCAGCTCGGAAGAGAGC	100	69	0R
chr2R	2.57235	100065162|F|0--56:A>G	TGCAGCCCCACGTCGCTGAAAGCCACGGTGAGGAACACCAGGGCCGTGAAGACGGCACGCATGAAGTCG	98.529	68	2R	13.21
chr2R	2.57235	3350782|F|0--66:T>C	TGCAGCCCCACGTCGCTGAAAGCCACGGTGAGGAACACCAGGGCCGTGAAGACGGCGCGCATGAAGTCG	100	68	0R
chr2R	2.96917	100012287|F|0--29:C>A	TGCAGAGCAATGAGTAGTGCACAACAAAACAAGAATGGATTAAATTTGCAAAGGCTCACCATCAGGCCT	100	69	0R
chr2R	2.9984	3735501|F|0--63:A>C	TGCAGGAGGAGTCGCCGAGAAAAAGGAGTAGCGGCTCAGCACGTGCTCGGGCTCTGTGTGCGGAGACGA	98.551	69	0R
chr2R	3.12325	5037413|F|0--28:A>G	TGCAGCGCCGCCCACCAAGCTAGCCGCGACACCCCAACCCCTTCCCTTCTGAGCCTTCTATCCCTCTCA	98.551	69	0R
chr2R	3.12325	100080925|F|0--7:A>C	TGCAGGTATGAGAACACAGGGAAGAACGGGAAGAGGGATGAGACGACGAAGCTGGCTGCTAGCGCGGGC	98.551	69	0R
chr2R	3.12325	5046997|F|0--30:A>G	TGCAGGTCTGAGAACACAGGGAAGAACGGGAAGAGGGATGAGACGACGAAGCTGGCTGCTAGCGCGGGC	100	69	0R
chr2R	3.12475	5206710|F|0--10:T>C	TGCAGCAAGATGACGGCGTCGATGTCGGCTTCGCCACGCCGCTGGCCACGGGTGGAGAAATTGGGCCGC	100	69	0R
chr2R	3.22171	3601015|F|0--40:C>T	TGCAGTGGCGCCATGGGCAGCATGGCCAATGGCCATGGAGCCGCGTGCCTTGGGTGTGACGCAGCCGAT	100	69	0R
chr2R	3.75638	5216366|F|0--17:G>A	TGCAGCAAGACGACGGCGTCGACGTCGGCTTCGCCACGCCGCTGGCCACGGGTGGAGAAATTGGTCCGC	100	69	0R
chr2R	3.96902	100043895|F|0--35:T>C	TGCAGATATCATCTGTACGCACGATGTGTCGTGCATCAGCCGTAGATGAGATGAGATGAGAGTACATGT	100	69	0R
chr2R	4.00919	100028616|F|0--58:C>T	TGCAGTGTAGTTGTCATGACTGAAGCCGTCGAAACGGAATGGGGGACATTTCCTCCGCCTCCACCCGTC	98.551	69	0R
chr2R	4.18907	100075323|F|0--61:A>C	TGCAGACTCGCCCAAGATTATCCGACATATTGACGCGCCGGGGAGCGGAACGGCAGATCCGAGGCGTCG	100	69	0R
chr2R	4.33526	3732112|F|0--36:G>A	TGCAGTGTACTCGTCATAGCCACAAAATTTGTGACGGAATGGGCGTGATATCCTGCTTCTCCACTTAGC	100	69	0R
chr2R	4.37208	3909637|F|0--46:G>A	TGCAGTGGCTCCTAGAGCGCGGACGGGCGCGAGCAGTCGCAGCTGCGAGCAACAGCGGCCGCATACGAG	98.551	69	0R
chr2R	4.66479	3730362|F|0--22:A>G	TGCAGCAACCATCGCTGCACACATGTCGGCGGCTTCAGACAGTCAGACAGCAATGCATTTTTCCACGAC	100	69	0R
chr2R	5.0132	100063571|F|0--36:C>A	TGCAGCGAGGAGCTCCTCGTGGAGCGCCTGGTGCGCCGAGGCTTGGAGCAGAACAATAAGCCTCTGAGC	100	69	0R
chr2R	5.03198	100005485|F|0--62:G>C	TGCAGGTACATGGTGCATATACTGCTGCAAAAGTACAAAAGCGACGGGATGGCTAGATGCAGGGGCATA	100	69	0R
chr2R	5.13218	3737633|F|0--37:G>T	TGCAGTTGAACGGGGAGTAGGTGCTCGACGATCTGGGGTCGAAGAGCGGGTCCGCCTGCGGGTGGCACT	100	69	0R
chr2R	5.26571	100020936|F|0--25:G>C	TGCAGCTCTTTTCATCCTTGACACAGCTCACTATGCCTATAAGTGGTGAAATGATCGCTACGCCGAGAT	100	65	0R
chr2R	5.26611	5047394|F|0--51:T>G	TGCAGATTTGCAGGCAGCAAGAGCACGGATCGTAGCTGGGGTTGGAGCCCCTGAAGAAGCAGGGAGGGA	100	69	0R
chr2R	5.28042	100062097|F|0--50:C>T	TGCAGCATGCAGGCTGACCTCTTGGACGGTGCTACACCTGTCACCGCACGCTGTGGCCTCCTCTTGGTG	100	69	0R
chr2R	6.51916	100041569|F|0--63:T>C	TGCAGACTGGTAAGGAACGACGTCAATTGTAGCTGTGTTTTTTGGTTAGTATAAGGAAAAAAATAAACA	98.551	69	0R
chr2R	9.09506	100010181|F|0--5:T>C	TGCAGTCATATGCTCCTGGGTTGGTGTTTCCATGTAGCGACTCACAATTCCAACCGCATATGCTATGTC	100	69	0R
chr2R	9.20821	5216902|F|0--53:G>A	TGCAGCAGCGTGGATCCATGGCGCCTTGGGGAAGAAAGTGAAGGGAATAAGACGGTCCAGCACCGTTCG	100	69	0R
chr2R	9.35952	100105913|F|0--23:C>G	TGCAGCAGCGATGAGCCTGCTATCTTGCTCTCGGAGGACAATGCCGTGGCACTGTCGGTGGACGCCAAA	100	69	0R
chr2R	9.43727	100077169|F|0--34:C>G	TGCAGCCAGAGCAGCAGCGGCGTGTCGGCCGGCGCGGTGAGCGGGTGGCTGGCCTCGTAGAAGGCGTAG	98.551	69	0R
chr2R	9.43755	100036774|F|0--10:A>G	TGCAGTGAGCACCAGCACGCGCGCACATCATCCTCTTCCGATCTGATCCGCCGATGGCTCAGCCGCTTA	98.551	69	0R
chr2R	9.51655	100136757|F|0--18:T>C	TGCAGAAGAAGTCGACGATGAGGACGGCCGGGGAGGCGCCGGCGAGGAAGACGCGGAGGTGCGGGATGG	100	69	0R
chr2R	10.5288	3350460|F|0--52:A>T	TGCAGCAGAGTCATGGACAAAAGTGAAGTTCACAAAAGAACTTCATACGAAAAAGGCAATTGTTTCAAC	98.551	69	0R
chr2R	11.9022	3603012|F|0--16:A>C	TGCAGATGGGCTCAGCAGGCGTTCTTGATTCCAAGCAGCATTGTTTCGCGTCGCTACGTCCAAACGCAG	100	69	0R
chr2R	12.252	100000244|F|0--35:G>T	TGCAGCGTTCGTGCGCTGGGAAGAAATACTGCTGTGTCTCCCTGCTCCTTCTTCTTCTGTACTTCTCTT	100	69	0R
chr2R	13.2736	3598488|F|0--5:T>C	TGCAGTCTAGCGAGCATGTTGCCGGCACAGATCCTGTAGCCGCCACCGAACACCTGGTACGTCCCTGGC	100	69	0R
chr2R	13.5025	100081404|F|0--31:T>C	TGCAGTACAATGAAGAAATGTCAGGATTTCGTGATTCATCACGAGCACCTCATTAGCAGAACCATGGGT	100	69	0R
chr2R	13.7384	100008384|F|0--58:A>T	TGCAGCACTTTCCGCATGCATGCAAGCGAATTGATACTCATAATTGGCGGCGAGATCGAATCAGTTCGG	100	69	0R
chr2R	13.9483	5223683|F|0--15:A>G	TGCAGATTGGCCTCCATCTGCTCGAAAATCGGAAACCATGCATAGATACATTTATTTTGTTCTGTAACA	100	69	0R
chr2R	14.2789	100031014|F|0--10:T>C	TGCAGCAACATCAAGTGAAAGTTCACATCAAAAGGAGAGGAAGATATCGTCTGAACTCCAATTTATAGC	98.551	69	0R
chr2R	14.467	5218984|F|0--31:A>C	TGCAGCGGCAGGGGAGCCGCGACCCACCCGCAGCGAGCAGCAGCAGCGGCGACGGGTCTCACGGGAGCA	100	69	0R
chr2R	14.49	3595670|F|0--31:C>G	TGCAGTAGTCGAGGTCGTCGACCACGTCGTCCGCGTCGTAGAGCGCCTCCCTGAGAGCCGCGAGGGACG	98.551	69	0R
chr2R	14.58	100064082|F|0--36:A>G	TGCAGTCGGGGCAGCGAATGGCAGAAGACCACCAAAAAATACCCACACGGCCACGTATGCAACTGATGA	98.551	69	0R
chr2R	14.589	100086099|F|0--11:T>G	TGCAGTGCAGATACTAAAATGGGGCAGCGAATGGCAGGAGACCACCAAAGAATACCCACGCGGCCACGC	100	69	0R
chr2R	14.589	100086099|F|0--68:C>G	TGCAGTGCAGATACTAAAATGGGGCAGCGAATGGCAGGAGACCACCAAAGAATACCCACGCGGCCACGC	100	69	0R
chr2R	14.7084	100034790|F|0--7:T>C	TGCAGTGTAGATACTAAAACGGGGCAGCGAATGGCAGAACACCAAACGATACCAACGCATGCAACTGAT	98.551	69	0R
chr2R	14.7084	100112850|F|0--14:T>A	TGCAGTGCAGATACTAAAACGGGGCAGCGAATGGCAGAACACCAAACGATACCAACGCATGCAACTGAT	100	69	0R
chr2R	15.0224	3364686|F|0--34:G>C	TGCAGTTCGTGCAGTCGAGCGACGCGGTGGCGCGGGGGCACAACATCTTCTGGGAGGACCCCAAGTACA	100	69	0R
chr2R	15.0744	100024663|F|0--18:C>T	TGCAGAAACACATCTAGACAACCCTATTATAGACCAAAGAAGCCTAGAGCCAAATGCAGTTTTAACATC	98.551	69	0R
chr2R	15.2001	100131889|F|0--10:G>C	TGCAGCTCCTGTAGTTGGGACATAACTGCCATCAGTGTTTAACTTCGTCCAGCCCGGGCTAGGCGGCGC	100	69	0R
chr2R	15.856	100024727|F|0--6:T>G	TGCAGCTGTAGCCGCCGCCAAGATGGGGTCCAAGGTGTCCTCGTCGGCCTCCTCCAAGATCTCACTTTA	100	69	0R
chr2R	16.4028	3347644|F|0--58:G>T	TGCAGATACAGTGCAGACAAATTCATTATTCATTTATTCTTGTGTACTAGTTGATGTAGTCTACGCCAA	98.551	69	0R
chr2R	16.5199	3742323|F|0--23:C>G	TGCAGCCGCGACGCCTCGTCGGGCAGCGGGATGTAGATGAGCTGGTCGAGCCGCCCCGGCCGGAGCAGC	98.551	69	0R
chr2R	16.5512	100017708|F|0--19:C>T	TGCAGCGCTGCTAGCTGCACACAAGCATGCATGCCAGCGTGAACTCAGCCACAGTGCATGGTGACATAT	100	69	0R
chr2R	16.6728	100016246|F|0--52:T>A	TGCAGCTGCACCTCCGAACGTACGTGGCAGGCAGCGGCAGCGAAATGCCACCTTGCCATGCATGCCAGG	100	69	0R
chr2R	16.6874	3346783|F|0--52:G>T	TGCAGATGGGCGTTTCAGTCGTTCGTCCAGCCACGAGATGACGTGCAAAACCGTGCACACGCAGCACAA	100	69	0R
chr2R	17.3033	100036618|F|0--42:C>G	TGCAGGAGTGATTATGATTTTCCTTCTGACATCTGCATGAGTCATTGTCTTTTTATACACACGTGCAGT	100	69	2R	42.51
chr2R	17.5037	100126056|F|0--48:A>G	TGCAGGACTTCCTGCCGGTGCTCGGCGTGCTGGACATCGGCGGAGCCAAGCGGCGGGCGGTGCGGCTGT	100	69	0R
chr2R	17.5752	100058431|F|0--44:C>G	TGCAGGTTGGACGCCCCGTGCATCGCGAAGTACTCGCGCACCATCTCCCGGAACCTGGCGGCATCCTCC	100	69	0R
chr2R	18.1154	100032365|F|0--67:A>T	TGCAGAGTCTAACAGGGGCTCCAAGGTTACTTGTGGCAATAGCGAATGATGACATTCTTCCTGTTCTAA	100	69	0R
chr2R	18.2438	100002752|F|0--38:T>C	TGCAGAGCATCGATGAACCTCATGACACCGTGAAGGTCTGATGCCACCTCAAAGCTGATGATGCCGCCT	98.551	69	0R
chr2R	18.6475	100032928|F|0--27:T>C	TGCAGAGGAGCCTGAGGGGCGAGATCATGTTCCTCCGAGCCGAGCTGGAGAGCATGCAGGCCGCCCTCG	100	69	2R	45.34
chr2R	18.6475	100032928|F|0--61:C>T	TGCAGAGGAGCCTGAGGGGCGAGATCATGTTCCTCCGAGCCGAGCTGGAGAGCATGCAGGCCGCCCTCG	100	69	2R	45.34
chr2R	18.6475	3354603|F|0--27:C>T	TGCAGAGGAGCCTGAGGGGCGAGATCACGTTCCTCCGAGCCGAGCTGGAGAGCATGCAGGCCGCCCTCG	98.551	69	0R
chr2R	18.8355	5035109|F|0--13:C>T	TGCAGGACAGCATCCCAAGGGTGTACCTCGCCGCCGCGGCCGCCGCGCTGTACGCGCGCGCGTCGTCGT	98.551	69	0R
chr2R	18.8355	5035109|F|0--63:C>T	TGCAGGACAGCATCCCAAGGGTGTACCTCGCCGCCGCGGCCGCCGCGCTGTACGCGCGCGCGTCGTCGT	98.551	69	0R
chr2R	19.1204	3346186|F|0--67:G>C	TGCAGATGCCCTTGCATATATGCATTCGCAGGCGAGCCAGAAGATCCTACATGGAGATGTGAAATCCGA	100	67	0R
chr2R	19.1269	100072042|F|0--9:C>T	TGCAGCGCGCAGGGGGAGAGTTCACCGTCACAGGACATGTCCTTCAACCTGCGCGGTGGCCTGTTCCTG	98.551	69	0R
chr2R	19.2208	3745059|F|0--12:A>G	TGCAGTCCCACGACAGCTTCTGGCTCCGCTGGCCGGCGAGGGACCTCCTCGGCCTGTCCTCCATGTTCA	98.551	69	0R
chr2R	19.229	5200350|F|0--45:G>T	TGCAGGTCCGAGACACCATCATCATGGTACGTCTCTCACCTCTCCGGTCTCTCCATTTGTTCAGCTATC	100	69	0R
chr2R	19.2349	100023958|F|0--7:G>T	TGCAGGAGCGATACAGCAGGGCCGCCAACTAGGGGAGGCCGCACACCGACTAGTTGCAAACAGCTTGAA	100	69	0R
chr2R	19.6066	5042995|F|0--23:G>A	TGCAGGCACCATTGCTGATATGCGGCAACATTGGGAGTGGTACTATGACAAGCATTATGCTGTCTAGCA	100	66	0R
chr2R	19.6066	5042995|F|0--9:C>A	TGCAGGCACCATTGCTGATATGCGGCAACATTGGGAGTGGTACTATGACAAGCATTATGCTGTCTAGCA	100	66	0R
chr2R	19.7883	3908158|F|0--6:A>G	TGCAGCATGGTGAGGCGAGAGAACAAGGTGGTGCCGGCGGCGCCGCCTCGTGTCGACTTGAGGTCGCAG	100	69	0R
chr2R	19.9369	5039211|F|0--44:T>C	TGCAGTTCTCGGGCTCCTCCTCGTCGTCTGTGTCAGGGTAGTGTTTCGAGGAGTAAGTCTTCTTCTCCG	98.551	69	0R
chr2R	19.9369	5211186|F|0--34:A>T	TGCAGTTCTCGGGCTCCTCCTCGTCGTCTGTGTCAGGGTAGTGTCTCGAGGAGTAAGTATTCTTCTCCG	98.551	69	0R
chr2R	19.9369	5211186|F|0--58:A>C	TGCAGTTCTCGGGCTCCTCCTCGTCGTCTGTGTCAGGGTAGTGTCTCGAGGAGTAAGTATTCTTCTCCG	98.551	69	0R
chr2R	19.9373	100040802|F|0--48:G>T	TGCAGACCCCACGCCTGCGCTCGCTGCGGTACAAGGGCGGCCTCCCTCGGGACACCTGGTTAATCTACG	100	69	0R
chr2R	19.9386	100068090|F|0--57:G>C	TGCAGCTCTTGCGCTCCGTGGCCTCGTAGTAGTAGGTGTCCCAGTCGGCGTCCCTCTGCCCCTCCGTCT	100	69	0R
chr2R	19.9819	5138958|F|0--44:T>C	TGCAGCGGCTGGGTAATAACAGCTCTGAAACCTTTGAGGGTCCTTGGCCCATCCCATCTCTGGAAACCG	98.551	69	0R
chr2R	20.247	3744884|F|0--46:A>C	TGCAGGCCGGGGTTGGGGCCGCTGAAGGCGACGAGGGCGACGGCCGAGGAGCTGCCGCCGTTGTACTGG	100	69	0R
chr2R	20.3369	3592152|F|0--16:G>A	TGCAGAACAAGGGCCAGGTTGCCAAGGACAAATTGGCCAAGGTGGCCTGGGGTGCCATAACCAACTACC	100	69	0R
chr2R	20.7545	100029394|F|0--11:G>A	TGCAGTGGCTGGGTAATAACAGCTCTGAAACCTTTGAGGGTCCTCGGCCCATCCCATCTCTGGGAACCG	100	67	0R
chr2R	20.7556	5219250|F|0--21:T>G	TGCAGTACCGGCACTACTCCCTCCACAGGCTCTGCCCCTTCGGCTGGTTCGGGAAGGCCGCATCGGCTG	100	69	0R
chr2R	20.8531	100012477|F|0--44:C>G	TGCAGGCCCGAGGATGAAGAGCCTGGTCAGGAGTTCGAACCTCACATGCCTCTAGCACCATCTTTTTTG	98.551	69	2R	48.91
chr2R	21.7189	3738937|F|0--39:A>C	TGCAGCTGCAAGGAACGGACCAGGCCGGGATGCGACCACACCTACCGGAAGATGTGGGAAGACATGCAA	100	69	0R
chr2R	22.1175	3744502|F|0--36:G>A	TGCAGCTGCAAGGAACGGACCAGGCCGGGATGCGACGACCCCTACCGGAAGATGTGGGAAGACATGCAA	100	69	0R
chr2R	22.1175	3744502|F|0--9:A>G	TGCAGCTGCAAGGAACGGACCAGGCCGGGATGCGACGACCCCTACCGGAAGATGTGGGAAGACATGCAA	100	69	0R
chr2R	22.1175	100053442|F|0--36:A>G	TGCAGCTGCAAGGAACGGACCAGGCCGGGATGCGACAACCCCTACCGGAAGATGTGGGAAGACATGCAA	98.551	69	0R
chr2R	22.4979	100177808|F|0--30:G>A	TGCAGCTCCAGGTACTGGACGATGTCATGGGGATTGCGGCGACGGAGCGGGTGGTCAAGGCCACACGGC	98.551	69	0R
chr2R	22.6878	3905340|F|0--40:G>A	TGCAGAGCCCGCTATGCCATTGCCAGCCAGACAGGCGTCTGCATGAATCTTCGCGTATCCTCTGGAGGA	100	69	0R
chr2R	23.5237	5225459|F|0--65:T>G	TGCAGTGGACTAGGGGTGGATCGCGGTCGTCGGTGTCGTAGAGCGCGGTGTCGGTGTCGTGGAGATTGG	100	65	0R
chr2R	23.5664	100109745|F|0--14:A>G	TGCAGTCAGCATACACCATCGGCTGCCGCCGTTGCTCCAACGACAGAGGCTTCCCATCCCTGTTGATGG	100	69	0R
chr2R	23.5664	100109745|F|0--15:C>A	TGCAGTCAGCATACACCATCGGCTGCCGCCGTTGCTCCAACGACAGAGGCTTCCCATCCCTGTTGATGG	100	69	0R
chr2R	23.7143	100055269|F|0--38:T>C	TGCAGCGGGTGGGTAAAGGGAATGCAGTGGACGCTCGTTGACAACATCCGCGGCGATGCTCTCGCCGAC	100	69	2R	51.74
chr2R	23.7489	100032945|F|0--37:A>G	TGCAGGAAGGAGCCAATAAGAAGCTGCCGCTATTCGCAGTACGAACATGCGAAGAGATCACAGAGAGGA	100	69	2R	51.74
chr2R	23.753	100039667|F|0--67:T>C	TGCAGGACAAATAACTAGCCTTGATGGTCGACGCCCAATGCTTCGGCTGGACCCACTCTCCAGTGCTTA	100	69	0R
chr2R	23.754	100069360|F|0--53:C>G	TGCAGCTTCCAGTGGAGGTCCTGGTTGATGAAGCTGAGCGACTCGATGGACGACGCGATGGCGCTGCTC	98.551	69	2R	51.74
chr2R	23.754	3582216|F|0--53:G>C	TGCAGCTTCCAGTGGAGGTCCTGGTTGATGAAGCTGAGCGACTCGATGGACGAGGCGATGGCGCTGCTC	100	69	0R
chr2R	24.0048	100087638|F|0--59:C>G	TGCAGCTCCTCGAGGTACACGCTGCTGGTGCCGTCGAGGAAGCTGTCCGTCATCCTGGACAGCGGCACC	100	69	2R	52.3
chr2R	24.0114	100021126|F|0--34:C>G	TGCAGCTTGGGCCGCCTCGTCCGTCATACTCAAACCCGAACGCCATCCTCAACGGCGTCGAGATCATGA	100	69	2R	52.87
chr2R	24.9339	100005659|F|0--51:C>T	TGCAGCGCTTCCCCTTAACCTGGAAGATGCTTTTTCGTGTGTTGTTCCAGACAGCAGTTCAGCGAAATG	100	69	2R	52.87
chr2R	24.9349	3745898|F|0--33:C>A	TGCAGCCGGTGCCTCTAAGATCTAGTTAGCGACCTGGCATTTGTTGCAGTTTCTGTTTTTACTTTTGAT	98.551	69	0R
chr2R	24.9349	5206164|F|0--15:C>T	TGCAGCCGGTGCCTCCAAGATCTAGTTAGCGACATGGCATTTGTTGCAGTTTCTGTTTTTACTTTTGAT	98.551	69	0R
chr2R	24.9376	100004133|F|0--59:G>A	TGCAGTTAAAACGCAAAGCCAAATCATGGTCATGTTCAGGAGATCAAGAAATGCTCGAGGATTCGCTCA	100	69	2R	52.87
chr2R	24.9432	3743632|F|0--24:C>T	TGCAGGTGCCGGTTGCAGCTTCTCCAGAGCTCGCCCACTTTCCTTGGCTCGCAGCACCCCCAAATCTCT	98.551	69	0R
chr2R	24.9432	3892565|F|0--31:A>G	TGCAGTGGTAGAACTGGGTGAAGGCAGCACTACAAGCACAACGCGACGGTGCTGGAACCAACCGACGAC	100	69	0R
chr2R	25.3175	5209120|F|0--17:A>T	TGCAGCATCTCATCTAGAATCCCAGCAGATCAGCAGCGGCCCTGGAGTGGGGAAGACGATTGGGTCGGG	100	69	0R
chr2R	25.4456	100140009|F|0--18:C>G	TGCAGGTGGTGCGTGCGGCTACCATGGTGACGTGGAGCAGCCGCCGTTCTCCGCCATGATCACGGCGGG	100	69	0R
chr2R	25.8827	100015866|F|0--19:T>G	TGCAGCACCGGCCGCGCCTTGGCGAGGTCGGCCGCGCAGAGCCGCCCGTCCTCGCCCGAGAAGCCGAAC	100	69	0R
chr2R	25.9067	100007792|F|0--19:C>G	TGCAGCCAGCGTGCGCTTTCGCCGTTGCTTATATAGCCCTAGCAGCCAACGCAAGGCTTCAGTGCAGCA	100	69	0R
chr2R	26.0207	3348722|F|0--41:G>A	TGCAGGACAAGGAAAAGAAATTTCTTCTTGTGCTTCCCGTTGTCCCTTGGATACGCTGTATTGTTCCTG	100	69	0R
chr2R	26.1211	5207759|F|0--53:A>G	TGCAGCTGCCGCTGCTGCTGCTGGAGCAGGAGCACGGTGTGGTTGAAGGCGCCATCGACGGCGTGGAGG	100	69	0R
chr2R	26.3383	100099310|F|0--52:C>T	TGCAGGCGCAGGCGGCTGGATGCGCTGCGGCCTCGTCCGCACAGCGATCTCGCCGTCCCCCAAGTGGAC	100	69	0R
chr2R	27.4134	5213017|F|0--14:C>A	TGCAGTGGACGCGGCCCACCGAGTGCGCGCCCAGCAGCGCCACCACGGCCTCGGCGTCCAGCCCCATGG	100	69	0R
chr2R	27.4146	3353057|F|0--31:T>A	TGCAGATCTTCTGACTGAAAATGGAGTAAGGTGGTGGTGCATGTCAAATTCAGGAAGCATGCATGCCCG	100	69	0R
chr2R	27.4669	100034720|F|0--48:C>T	TGCAGATCTTCTGACTGAAAATGGAGTAAGGAGGTGGTGCATGTCAAACTCAGGAAGCATGCATGCCCG	100	69	0R
chr2R	27.4707	100058168|F|0--41:A>G	TGCAGCTCCGACACCGGCAGCACCGTCTGCCCCGCAAAGTCATCCTTCTCCGACATGTCGTACTCGTGC	98.551	69	0R
chr2R	27.4736	100109871|F|0--34:C>G	TGCAGTCGCTGCTGAGCTGGTTGCCGGTGAGGTACGAGTTGTGGCCGGTGTAGATGTAGTAGTGGGAGA	98.551	69	0R
chr2R	27.4736	100109872|F|0--46:C>G	TGCAGTCGCTGCTGAGCTGGTTGCCGGTGAGGTACGAGTTGTGGCCCGTGTAGATGTAGTAGTGGGAGA	100	69	0R
chr2R	27.4738	3597101|F|0--35:C>G	TGCAGGCGGATCTGGTCCAGCAGGCGGTCCGCCTCCCCCTCGGCGTCGGCGTCGGCGGCGTCGTGGTCG	98.551	69	0R
chr2R	27.4738	3906275|F|0--19:C>G	TGCAGGGGCACCAGCAGCGCGCCGGCCCGCGCCTCCCGCGCCTGGGGCGCGGCCAGCTGCTCTCCCTCG	100	69	0R
chr2R	27.5554	3893173|F|0--10:A>G	TGCAGTGGACACGGCCCACCGAGTGCGCGCCCAGCAGCGCCACCACGGCCTCGGCGCCCAGCCCCATGG	100	69	0R
chr2R	27.711	100017697|F|0--24:G>A	TGCAGATGGTAACCAGATAAAATCGGGTAGGTTTATCAACGACGTGCTTTTCAATCCGTAACTGTACAG	100	69	2R	65.46
chr2R	28.0293	3354026|F|0--10:G>T	TGCAGCAACAGACAAAGAAACGGAATCACCACCACGGCCACGGCCAGCGCCAGAAGAAACCAAACTCCG	100	69	0R
chr2R	28.0295	100156412|F|0--53:G>A	TGCAGAAGAAGCTGCACCAGGTCCCGCCCCCGTCCCCTCTCTCGCTCCATCCCGTCAGATTTGGGGGAA	98.551	69	0R
chr2R	28.0295	100156413|F|0--41:T>C	TGCAGAAGAAGCTGCACCAGGTCCCGCCCCCGTCCCCTCTCTCGCTCCATCCCATCAGATTTGGGGGAA	100	69	0R
chr2R	29.1204	100008342|F|0--45:G>A	TGCAGTGAGGATGAGTACGCCATCGCCGCTCTCAGGAACATCGATGATTACTTCACCGACGAGCCACAG	100	69	2R	67.7
chr2R	29.4405	100013375|F|0--19:A>C	TGCAGAACCTGGAGAACGGAGAAGTTGTGCGCATGATGCCGACATGCATGCACTTCTTCCAGGGCAGCT	98.551	69	2R	68.26
chr2R	30.3025	100005198|F|0--62:T>A	TGCAGGACTAGTTCGTCGTCGTTGTACCAGTCTTGATACTCAGTGTAAAATTGCTGGTGATGTATGTCA	100	69	0R
chr2R	30.3025	3749376|F|0--17:C>T	TGCAGCATGCTCACTCCCTGTTTCATATCTGCAAGCGTGGGATAGTTGATTGCGTGATTGCGGTGGATG	100	69	0R
chr2R	30.6103	3351683|F|0--26:G>A	TGCAGCTCCACCTCGTCGGTCTTGTCGGACTCCACGGAGAGCAGCACGTCCTTGCGGCGCACGAACCGA	100	68	0R
chr2R	31.5111	100084261|F|0--27:G>A	TGCAGCGCGGCGCCGAGCTTGGGAGACGCCTGGTGGAGGCGTACGCGGAGGACAAAGCGGCGGCGTGGC	98.551	69	0R
chr2R	31.8855	100002851|F|0--48:G>A	TGCAGTCTTTGCTAGACTGGAAGACGGCGTGATCGTTGATCTTGAACAGTAGGTCGAGCTTCCTGACGA	100	69	0R
chr2R	31.8949	3584698|F|0--5:C>T	TGCAGCGTCGCCGTGGTTTTCTCGTGAAAGTGCCAGAAGGAGACAAGCGTGTCCTTGGGGTCCCGACAC	100	69	0R
chr2R	31.8949	100077814|F|0--46:A>G	TGCAGCGGAGGGCCGACGTCGGCGGCGCGTCGTCCGCCATGCCGACATTCGAGGAGGCGTTCGAGCTCT	100	69	0R
chr2R	31.9014	100033248|F|0--26:G>C	TGCAGCTTAGGGACGCTCAAGGGGCTGGAGGTCAACAGGAGCGGGAGCACGATGCTGGGGCTCAAGAAC	100	69	0R
chr2R	31.9014	100033248|F|0--46:G>C	TGCAGCTTAGGGACGCTCAAGGGGCTGGAGGTCAACAGGAGCGGGAGCACGATGCTGGGGCTCAAGAAC	100	69	0R
chr2R	31.9017	3365292|F|0--23:G>A	TGCAGCGGATGGCCGACGTCGGCGGCGCGTCGTCCGCCATGCCGACGTTCGAGGAGGCGTTCGAGCTCT	98.551	69	0R
chr2R	31.9073	5225331|F|0--5:T>C	TGCAGTGGATGGCCGACGTCGGCGGCGCGTCGTCCGCCATGCCGACGTTCGAGGAGGCATTCGAGCTCT	100	69	0R
chr2R	32.7335	100034250|F|0--65:G>C	TGCAGCTGCCTACTCTCCGACGCGCCCACGGCCCCAGGCTGCGTCGTGCTCATCGTCGAGCCTGAGGAA	100	69	0R
chr2R	33.0026	3899920|F|0--53:A>G	TGCAGGGTGGGTAGATGAAACATGAAGAAAGCCGCGGCAATTTCATAGAATGAAATGGAACTAGGTTGA	98.551	69	0R
chr2R	33.0905	100029892|F|0--54:G>T	TGCAGCAATTCAGAATGTGTATGGCAGCAATCAAAACCACTGATGCACAAGAACGCCGCTCTCCCGGAG	98.551	69	0R
chr2R	33.8418	100170116|F|0--30:G>C	TGCAGGTTTTGGCTTGGCCCAACTATTGTTGGCAGTCCCATTGCGCTTGGCTGCGCATGTCGTGCGCTT	100	69	0R
chr2R	34.0059	100007296|F|0--37:C>A	TGCAGCCCGCCCACCATGTCCTGGTTCAGGATGGACACCACCGAGCTGTCCGTGTGCGCCTCCATCCCC	100	69	2R	84.44
chr2R	34.9572	100076784|F|0--31:C>A	TGCAGCAGCTGTTCCTCGACGACAACAGCTTCGTCGGGGAGCTGCCGGCGAGCATCGGCGAACTCTCCG	98.551	69	0R
chr2R	34.9572	3596276|F|0--61:G>A	TGCAGCAGCTGTTCCTCGACGACAACAGCTTCGTCGGGGAGCTGCCGGCGAGCATCGGCGAGCTCTCCG	100	69	0R
chr2R	35.3111	100068208|F|0--41:G>T	TGCAGACCACAGTCGACCTCTCGGGTGTGGTGCAGAGCACGGCGTACGTTGGCTTCTCGTCCACAGCAG	98.551	69	2R	84.44
chr2R	35.3201	100074261|F|0--27:A>G	TGCAGTATACCCGAGAGGTCAACGGCCATCTGTAAGAGGGGCCTCTTGGGCCTGGCCACGCCCAACGGA	98.551	69	2R	84.44
chr2R	36.2751	100028953|F|0--58:T>C	TGCAGCTCCATCTTCATTGGCCACGTTCTTCCCCACGACCACTGCCACTAGGCCGGCATGGTCGAGATG	98.551	69	2R	84.44
chr2R	37.3717	4095377|F|0--40:C>G	TGCAGCAGTGCTGGATCTGGCCGAGGGACGTGTCGTCGCGCCGCGACGGCGGCAGGTCGTGCACCACCG	98.551	69	0R
chr2R	37.372	5207515|F|0--63:C>A	TGCAGGGGATCACCGACTCGTTGTAGAAGGCGGAGAAGGACACGCAGCATTGCGGCGGCTTGGCCGAGA	100	66	0R
chr2R	37.3904	100075516|F|0--21:T>G	TGCAGGGGATCACCGACTCGTTGTAGAACGCGGAAAAGGACACGCAGCAGTGGGGCGGCTTGGACGGTT	100	69	0R
chr2R	39.056	100008394|F|0--17:T>C	TGCAGACAACAATGCCGTGCCAGAGGTCGACCCATCCTACTGTGCCTTCTCCAAGAGAGATCACCTTGT	98.551	69	0R
chr2R	39.5031	3582727|F|0--61:A>G	TGCAGAAGCTACAGCGTTCTCAGCAAGGTGAACTTGGTGGCGCCGGCACCACCGGAGAGGCAGCAGCCG	100	69	0R
chr2R	39.8311	100148479|F|0--21:C>T	TGCAGCCTACGAATCAGTCATCGAACCAAGAATATAAACTCTGGCAGTCTTGTTGTCCTTGGTCCATTG	100	69	0R
chr2R	40.1252	100010477|F|0--39:C>T	TGCAGATCTCAAACCCTGACTCGATCGACTCCTAACATACGCAACCAGCTAAAATCACCAGCTTCGTCG	98.551	69	0R
chr2R	41.474	100077703|F|0--42:C>G	TGCAGGCGCCGCCGTTCTGCGAGGACGAGAGCCGCGTCGGTCCCCGCCGTTCCTGGATAAAAGGCCGCA	100	69	0R
chr2R	42.1496	100072830|F|0--7:A>C	TGCAGAAAAAATGGAAGCTGCTGCTTCCCGCAAAATAAATGCACGGAAAAGATCCCTTTTGGATGGTGC	100	69	0R
chr2R	43.3466	100139842|F|0--44:C>G	TGCAGGTAGCAAGTGGAGCAGAAGAACAAACAGTAACATGTGCACAAGAAGTGTGATGGGGCTCATGTG	100	69	2R	86.73
chr2R	43.9265	100009254|F|0--39:C>T	TGCAGATACTGACCAGATGCAGACATGTACATAGTCGGCCAATGCGTTTGGCCACACCGTCAAAACCGA	100	69	2R	86.73
chr2R	43.9343	100012768|F|0--59:A>G	TGCAGTACGTGCATGCTTATTCCAGTTGACCACGGGGTCTATGTGATGTCTTCATCTTTATCGGAAAAA	100	69	0R
chr2R	44.0198	3345932|F|0--25:T>C	TGCAGTGGTTCTCTCCTCTTTCGCCTTGTTAATTTGTCCACGCCTAGACGTAGCATCTGATGATTACCC	98.551	69	0R
chr2R	44.2841	100020095|F|0--30:C>T	TGCAGAATTGACACTAAAGGTCCTTACGAACCGGGATTAAAGCCCGATTCTGCACTAATGACTACAGAG	98.551	69	0R
chr2R	44.2841	3737607|F|0--30:T>C	TGCAGAATTGACACTAAAGGTCCTTACGAATCGGGATTAAAGCCCGATTCTGCACTAATGACTACAGAG	100	69	0R
chr2R	45.4861	100023839|F|0--33:C>T	TGCAGCTTCCTGGAAGCTGCCTGCCGAAACCTTCAAGCATTTATGGTGGCTAATTAATTTCAGTGGTTA	100	69	0R
chr2R	45.4861	3355417|F|0--33:T>C	TGCAGCTTCCTGGAAGCTGCCTGCCGAAACCTTTAAGCATTTATGGTGGCTAATTAATTTCAGTGGTTA	98.551	69	0R
chr2R	47.7524	3742113|F|0--47:T>C	TGCAGCGAAAAAGAAAGAAAGGTCCTCTCCTGGGAATATATAAAGCGTGCCCGCAGTGGTGGTACGCTG	100	69	0R
chr2R	48.1247	100072015|F|0--35:G>T	TGCAGCTCCTTGAGGCGCTTGAGCCTCATGCGGTCGCGCCACATGCGGCGCTCCAGCTCCTCGATGCCG	100	69	0R
chr2R	48.1247	3365185|F|0--35:T>G	TGCAGCTCCTTGAGGCGCTTGAGCCTCATGCGGTCTCGCCACATGCGGCGCTCCAGCTCCTCGATGCCG	98.551	69	0R
chr2R	49.3319	100065761|F|0--14:C>G	TGCAGCTGTGATTCCGTGAAATAGTCATTTTTTTGTCAACATGGCTCTTATGACATGCTTGTGTTCTTT	100	69	0R
chr2R	49.6598	100005896|F|0--50:T>G	TGCAGGTATGCTTCCATTCAGGAGGTTACTTCCAAGGTCCAAATAGAAGATCCTCTTGCAGTTCTTAAG	100	69	2R	89.56
chr2R	50.0761	3596043|F|0--38:T>G	TGCAGCCTACCCTAGCCGATGTATGTCGGTCGAGTGGCTCCTGTGAAAGAAAGAGAGAGCGTGGCGTGC	100	69	0R
chr2R	50.4097	5225848|F|0--19:G>A	TGCAGACGGAAATGAGCGAGCAAAAGTGGCAGGCTGGGTTTCGAGAGGACGGTGTGGACAGAGTGCTTG	100	69	0R
chr2R	50.4097	5225848|F|0--65:C>T	TGCAGACGGAAATGAGCGAGCAAAAGTGGCAGGCTGGGTTTCGAGAGGACGGTGTGGACAGAGTGCTTG	100	69	0R
chr2R	50.7895	100037572|F|0--64:A>G	TGCAGAAAACGGTTCCATCCTCTCTGCTGGCTGCTGCAACAGCACAACAATACCCAGTTGCCCAATCGG	100	69	0R
chr2R	51.2091	100021811|F|0--58:A>T	TGCAGTCCAGGGAAGCCACCGACGGCACGTAGTCAGATCACCACCTTGTTATGAACTTAAAGAAACTGC	100	69	0R
chr2R	51.2091	3908666|F|0--11:T>A	TGCAGAAGCACTACTCCAATCAATCGAAAGGCAAAACTAGAGAATTGTCTGAGCGCAGAGGCGATCCGA	100	69	0R
chr2R	51.2091	3908666|F|0--44:T>A	TGCAGAAGCACTACTCCAATCAATCGAAAGGCAAAACTAGAGAATTGTCTGAGCGCAGAGGCGATCCGA	100	69	0R
chr2R	51.4871	3360554|F|0--19:G>A	TGCAGGCCTACAGCTAGCGGGCCATCGGCATCTGCAACTGAAAACGAACTAACGATCCACCTCATCAGA	100	69	0R
chr2R	51.6839	3351888|F|0--27:T>C	TGCAGGTCCGTTCGTTGCACAGTCAATTGACACACATGGGTTTCTGAGGCTGCCGTTGCTTGGCTCCGT	100	69	2R	90.11
chr2R	53.2624	100050017|F|0--14:G>A	TGCAGTCGGCTGGAGATGCTTCCCGAGGGAGGCCAAGGTGACCAACAGTCCGCCTGCATCAACAAGAAG	100	69	0R
chr2R	53.2624	5039601|F|0--14:A>G	TGCAGTCGGCTGGAAATGCTTCCCGAGGGAGGCCAAGGTGACCAACAGTCCGCCTGCATCAACAAGAAG	98.551	69	0R
chr2R	54.0871	3355564|F|0--37:G>C	TGCAGTTCCATCATCAGAGTCGAACCATGGTGAGCAGGAGAGCAGGGATTACATACAGCGGTGATCGGT	100	69	0R
chr2R	54.3742	100060757|F|0--15:G>A	TGCAGCATGCATGGAGTTGCCTCACTGCATACGCACGAGAGGCATGGCGTGAGTTCGGTCACCTTGTGG	100	69	0R
chr2R	54.7685	3750225|F|0--44:A>C	TGCAGATGCATTAATTGGCGTTATTATGACCGGCATGAGTACACACGTAGAGTGTATTTGTTGCCGCCG	100	69	0R
chr2R	55.1217	100158330|F|0--17:G>A	TGCAGGTGGAGCTCGTCGAGGATGAGCGAGTCGCCGCCGAAGAAGGGCGAGTGCGGGCCCCCGCCCCCG	100	69	0R
chr2R	55.1217	100158330|F|0--32:G>C	TGCAGGTGGAGCTCGTCGAGGATGAGCGAGTCGCCGCCGAAGAAGGGCGAGTGCGGGCCCCCGCCCCCG	100	69	0R
chr2R	55.1222	3909331|F|0--58:G>A	TGCAGCAGCAGCAGCAGCAAAACGACGGCCAGAGGTAAAAATACCCACCACCCTCGCCGCCTACGAGCT	100	69	0R
chr2R	55.123	3735000|F|0--19:G>C	TGCAGCATCCTCGCACCTGGAATCCAATCCAACACAAGAATCTCAGCACACACTCACTCATCATGCATC	100	69	0R
chr2R	55.2037	100021219|F|0--55:C>G	TGCAGCCACGGGCCTGCTCGCAAACACGCACGCATTCCAAGGCTCAGACTCCAGACTCCAGAGTCCGCG	100	69	2R	90.67
chr2R	59.9778	100196831|F|0--42:T>C	TGCAGAGGGACTTGGGCGAGGCAGCAGGTGAAGCAGAGGCCTTAGTGGCGGGCGACAGAACTTGCAGGG	100	69	0R
chr2R	60.6907	100074390|F|0--35:G>C	TGCAGCTCCGACGCCGAGATGAAGCCGTCGCCGTCGACGTCGAACACCTTGAAGGCCTCCCGCATCTCC	100	69	0R
chr2R	61.1419	100064643|F|0--68:G>C	TGCAGTTCATTAATACCGCCGAAAAAGCAGGGGAAAACGGACGGGGCAGTGTACCAGTGACTGAGCAAG	100	68	0R
chr2R	61.1771	100024571|F|0--55:C>T	TGCAGGTAGGTCAAACGAGATGATATCAACTCCTGTCAAACAAGCAAGGAAGAAACAGATAATTTACAT	100	69	2R	91.22
chr2R	61.8175	100076972|F|0--20:A>G	TGCAGCATCTCCACACGGTCACGAACATCGACCAGGTCGTCCAAGACCGCCGCGGCCGGTGAACGCCCG	98.551	69	0R
chr2R	61.8175	4490751|F|0--53:C>G	TGCAGCATCTCCACACGGTCACGAACATCGACCAGGTCGTCCAAGACCGCCGCCGCCGGTGAACGCCCG	100	69	0R
chr2R	61.8175	5210175|F|0--54:T>C	TGCAGGAGTCTTCGCCTGGGGCGACCGTGGAGGCCGGGGAGCTGGTGGAGGGGATGATGGACAAGCTGT	98.551	69	0R
chr2R	61.8501	3581365|F|0--35:A>G	TGCAGCATCTCCACACGGTCACGAACATCGACCAGATCATCCAAGACCACCGCCGCAGGTGAGCGCCCG	100	69	0R
chr2R	61.8501	3743087|F|0--19:G>A	TGCAGGAGTCTTCGCCTGGGGCGACCGTGGAGGCCGGGGAGCTGGTGGACGGGATGATGGCCAAGCTGT	100	69	0R
chr2R	61.8723	5202538|F|0--16:C>G	TGCAGCATCTCCACACCGTCACGAACATCGACCAGGTCATCCAAGACCACCGCCGCAGGTGAGCGCCCG	100	69	0R
chr2R	61.8823	3744642|F|0--31:C>T	TGCAGGGGTCGCCAAGAGTGTCGGACATGGGCGCGAGGGAGCTCGTGAAGGGGATGATGGCCAAGCTGT	100	69	0R
chr2R	62.0462	3908221|F|0--31:C>T	TGCAGCGTCACCGCCTGCTCGCGCACCTCCACCAGGTCGTCGTAGATCACCGCCGGCCGTGAGCACCCG	100	69	0R
chr2R	62.0543	100038741|F|0--6:A>G	TGCAGGAATCCCTCCACGTTCCCATCACTCATCGTCCAAGGTGCTGCGTACGCTGCCCCACCGCCGAGA	100	66	2R	91.22
chr2R	62.3854	3586681|F|0--13:C>T	TGCAGATGCGTCTCACGGTAGAAGAAAAAAGGATTAACGGATAAGAATGGCCTGATCGTGGTGCCTTTG	100	69	0R
chr2R	63.1037	3906298|F|0--61:A>C	TGCAGGCTTGCTGCTGGGCTACACGGTACACTACAGCAAAAACAACTTACATACCGCCTGCATCTGTCC	98.551	69	0R
chr2R	63.2923	100033240|F|0--31:C>T	TGCAGGGATGAAGACGAAAAGAGAATTCATCCGATCTCAGGTAAATTATTTTCCAGTTCATGCTAAAGA	98.551	69	0R
chr2R	63.4114	3903272|F|0--49:A>G	TGCAGTTCAAGGCCAAGGAGGTCAACTGCTTCCAGGTGCGGCTGGCCAAATTCCTCGTGGAGAACGCCA	100	69	0R
chr2R	63.5423	100035743|F|0--8:T>A	TGCAGCTCTAATCAAAAAACTCAGAACAGACGCCCGAAAGACAATTGTATAGAGCACGCTGTCGAAAAA	100	69	0R
chr2R	63.784	100005498|F|0--43:C>T	TGCAGCTAGCTTGAAACCAACTATTACATCATTTCTTAATCAGCTCATTTTGCGATTATTGTAGTAAGT	100	69	0R
chr2R	63.7849	100108422|F|0--10:T>G	TGCAGGCCCGTCTCGGCTCGGCCGCGGTATTCGCGTCGCCGACGAAGCCGATTACCACCGCGGTGCACC	100	69	0R
chr2R	63.8058	5215304|F|0--23:A>G	TGCAGCTGGATAAACCAGAGGAAAGTTCTAATCAGGGGCGTGGCGGGCAAAGCATTTGTTGGACGTAGC	98.551	69	0R
chr2R	63.9051	100015969|F|0--65:G>C	TGCAGATATCCTTCCAAGTAAGTGCAGTTGCGCAGCGTGAGATCCGTGAGCCGCGGGAAAGCAAGGCGC	100	69	2R	93.47
chr2R	63.9377	100029038|F|0--31:T>G	TGCAGCCGTCGTCCCCTTCTCTATACCAGTTTCTGTCGAAGGCTCCTTCCTCCAGGAAGAGCGTGAGCC	98.551	69	2R	93.47
chr2R	63.9377	100068546|F|0--55:G>C	TGCAGGGTCGCCCAACTCCTAGCCGACCCTACCGTGGCGCGCGTGGAAGAGCTCAGCATCAGCTGCGTG	98.551	69	0R
chr2R	63.9377	3743956|F|0--55:C>G	TGCAGGGTCGCCCAACTCCTAGCCGACCCTACCGTGGCGCGCGTGGAAGAGCTCACCATCAGCTGCGTG	100	69	0R
chr2R	64.066	100025805|F|0--15:C>G	TGCAGAGCGTGGGTTCGCGTGTTAACACCGTTCGGGCCGAAACGTGGGACGTAAGCAGGCCTAGAATGC	100	69	2R	93.47
chr2R	64.1127	3596773|F|0--67:G>A	TGCAGATATCCTTCCAAGTAAGTGCAGTTGCGCAGCGTGAGATCTGTGAGCCGCGGGAAAGCAAGGCGC	100	69	0R
chr2R	64.724	3903163|F|0--17:T>C	TGCAGCGACGCCCGCAGTGACGCCGACTACGAGCGCGAGAACGCCTTCACCGTCATCGGCAGCAACCCG	100	69	0R
chr2R	65.0733	5215110|F|0--5:G>A	TGCAGGTGCTTGGGCAATACTGAACCAGTCCCTACCACAAGATGATAAGAATATGTAACGGCAGGATTA	100	69	0R
chr2R	65.1783	100045387|F|0--37:A>G	TGCAGTGTATTTTTATTAATTTTCAAATAAGTGATACATAAACGTTCTCAAAAGAAACAAAATTGGAGT	98.551	69	2R	93.47
chr2R	65.1783	3906362|F|0--14:A>C	TGCAGTGTATTTTTATTAATTTTCAAATAAGTGATACATAAACGTTCTCAAAAGAAACAAAATTGGAGT	98.551	69	2R	93.47
chr2R	65.297	100010898|F|0--54:T>C	TGCAGCAACTCAGCAACAGAGGGCAAGGAACAAGAAGCAAAAAAGCTCTCCAACTTGAATGCTTTCGAT	98.551	69	0R
chr2R	65.297	3576280|F|0--53:C>T	TGCAGCAACTCAGCAACAGAGGGCAAGGAACAAGAAGCAAAAAAGCTCTCCAACTTGAATGCTTTCGAT	98.551	69	0R
chr2R	66.3522	100046834|F|0--44:C>A	TGCAGGGAGATATATGATTATTTTCAGAGAGTTTCGAACGAATTCTTGTTGCATGGTACGGTCTAGAGT	98.551	69	2R	93.47
chr2R	66.3522	100132966|F|0--32:G>T	TGCAGGGAGATATATGATTATTTTCAGAGAGTGTCGAACGAATTATTGTTGCATGGTACGGTCTAGAGT	98.551	69	0R
chr2R	66.5911	3595514|F|0--54:G>T	TGCAGCTTCTGCGCGGTCTGGTCCAGCTCCTCCTTCAGAGAAGAAACCAAGGTGGCATCCGAGGACACC	98.551	69	0R
chr2R	67.1273	100039404|F|0--20:A>C	TGCAGGTCGGCGTCACTGAAACGCCGTCCCAGGAGACGCCTGGCGCCATAGATGGTGCGGTTCGGGTTG	98.551	69	0R
chr2R	67.3961	100001461|F|0--35:T>A	TGCAGGCACCTGGCCTATATGGATCACGAGAGGGGTCTGATCTGCCTGCGTGATGTCTGAATGCCCGAG	100	67	0R
chr2R	68.6116	100042116|F|0--50:C>G	TGCAGCCACCACCGCGCAACCATGGTAATCTCTTACTCCTCTCCCTCCTCCTCGTGTTCCCCTGCACTC	100	69	2R	94.03
chr2R	69.8122	100002729|F|0--62:G>C	TGCAGGCCAACAACTTCTTTAGCACACGCACGCACAGAGGGCAGCAGGCCGTCGTCCATGCGGCCGATC	100	69	2R	94.03
chr2R	69.8122	3581550|F|0--62:C>G	TGCAGGCCAACAACTTCTTTAGCACACGCACGCACAGAGGGCAGCAGGCCGTCGTCCATGCGCCCGATC	98.551	69	0R
chr2R	69.9001	100038244|F|0--50:C>T	TGCAGGGTTGACGCCAACGATAACCGATATGATGCGTAGCGATTGGGTCTCCCGATCTCGTCATGCTCA	98.551	69	2R	94.03
chr2R	70.2821	3602926|F|0--39:A>G	TGCAGCGTCCCCTTCTCCTCCGCCATTACTTCCGCCGAAAGGAAACGAGAGCTTCTGCTACCAGATCGA	100	69	0R
chr2R	70.2821	5219698|F|0--61:G>A	TGCAGGCGATGAGGGGCTGGGTCGTGGACCACAAGCTGCGGGCCGTAGGTGCGCCGCGGGGGGTTCCCC	100	69	0R
chr2R	70.6758	100033581|F|0--48:A>T	TGCAGAATAGTGACCGTCATGTCATGCTGTCGAAGACAAGCTACTAGTAGTCAGTGAGTGCTTGTCTAC	100	69	0R
chr2R	71.7704	100050850|F|0--29:C>T	TGCAGTACGAGCTGCATCAGCAGGGAAGGCCGCTGCGTCAGCAGTAGCAGCGCACCGCTGCTGACGCTA	100	69	0R
chr2R	72.8918	100024144|F|0--40:T>C	TGCAGTTATCTTTTCATGTCCCCTGTTTCACTCCATGTTTTGTCTCGTGCACAGGATCTTCGGAGGAAA	100	69	0R
chr2R	73.0672	3745720|F|0--16:G>C	TGCAGCACCGGCCGTGGCTGAGCGAGGTCGTCAGACGCACAGAGCTGCTCGTCTTCCCGTGAAAAGCCA	98.551	69	0R
chr2R	73.0672	3745720|F|0--29:G>A	TGCAGCACCGGCCGTGGCTGAGCGAGGTCGTCAGACGCACAGAGCTGCTCGTCTTCCCGTGAAAAGCCA	98.551	69	0R
chr2R	73.0672	3745720|F|0--30:T>C	TGCAGCACCGGCCGTGGCTGAGCGAGGTCGTCAGACGCACAGAGCTGCTCGTCTTCCCGTGAAAAGCCA	98.551	69	0R
chr2R	73.0672	100004041|F|0--28:G>A	TGCAGAAGGTGTGGGAATGCCCAGCTCCGCCTGAGCCGTGTTCCCTGATGGCATCTCACATCCTGCCGT	98.551	69	2R	96.26
chr2R	73.0672	100004041|F|0--40:T>C	TGCAGAAGGTGTGGGAATGCCCAGCTCCGCCTGAGCCGTGTTCCCTGATGGCATCTCACATCCTGCCGT	98.551	69	2R	96.26
chr2R	73.1784	100019514|F|0--59:A>G	TGCAGGATCGTGGACGCCGGCACGGGGCTCGTGGTGGCGGAGGTGAAGAGGAAGGTGACAGCGGGCGGG	98.551	69	0R
chr2R	73.1784	100124279|F|0--19:C>G	TGCAGCACGCCCGCTTCCCCGCGCGCGCCCCGCCGTCGTCGTGGATCCTGTACCGCATGGCGCAGCCGA	100	68	0R
chr2R	73.2557	100055903|F|0--44:T>C	TGCAGGGACACTCTTTTCACATGAATGAATTTTACGTACGAACATTTCTTGTCACGGTGGTTGAGGAGC	100	69	0R
chr2R	73.2557	3742809|F|0--44:C>T	TGCAGGGACACTCTTTTCACATGAATGAATTTTACGTACGAACACTTCTTGTCACGGTGGTTGAGGAGC	98.551	69	0R
chr2R	73.2557	3742303|F|0--32:C>T	TGCAGAATTCGCAGCTTATTTTTCAGGCAAAGCCGCATTCTCCAATAAACGAAAGCTGACGGTGGACGG	98.551	69	0R
chr2R	73.2557	100061957|F|0--32:T>C	TGCAGAATTCGCAGCTTATTTTTCAGGCAAAGTCGCATTCTCCAATAAACGAAAGCTGACGGTGGACGG	100	69	0R
chr2R	73.2561	3732026|F|0--13:C>T	TGCAGATAGGGGTCGGCTTTGGTGGTTACTGTGGCACCATCTGCGGGAACCAGTTAATTAGTGGAAACA	100	69	0R
chr2R	73.626	100026248|F|0--60:C>T	TGCAGCAAGTAGTGCAACACAACACTAGCAAGGTCGATCGACCGAAGGTAGCTTAGCTAGCAAGGAAGA	100	69	0R
chr2R	73.7964	100014098|F|0--5:C>T	TGCAGCTTGTTCTTATATATTCGTGAAGTTTGTTCTTATATATTAGAAATGATCATGGGTTAGTATTAC	100	69	0R
chr2R	73.9937	100015115|F|0--41:A>T	TGCAGATCAAGAACAGAACAGGTCAGAGTCGTCGTGGAAGGAAGCCGGGTTACTGTTGCTCAAGCGGCC	100	69	0R
chr2R	74.8331	100024974|F|0--17:A>G	TGCAGGCGCGGAGGAGGACTTCAGGCGTGATGCACACGATGAACTCGAGCATAGTATGCGCAAGCACAC	100	69	0R
chr2R	74.9862	100008039|F|0--21:T>C	TGCAGCCACAAAAAGATGCGTTGAGGGATCATGCCACCATTCTGTTGATCTACGCCATAAGAAAAGAAA	100	69	2R	98.5
chr2R	75.4716	3588103|F|0--56:C>A	TGCAGCAGCTGGGCGGGTCCCACGGTCGGTTCCCTTTCCATGACCATATAACTCACCAACACCTCATCA	100	69	0R
chr2R	75.4723	100114278|F|0--12:G>A	TGCAGCAATCGAGGGGATGAAGAGCCAGATGGGCGGCGCCGCCAGCGAGGAGACGGTGAGCGACCACGG	100	69	0R
chr2R	76.2778	100022237|F|0--31:A>G	TGCAGCTAGCTAGTCACCCAGACACACGCGCACACATACGTAGACCAACCGATGCAGTATTAAGTAATG	98.551	69	2R	96.26
chr2R	77.1487	100020019|F|0--10:T>C	TGCAGGCGGTTCTCGACGGCAACCTCCGCCTCCTCAAAGGTACCAGCAACAACCAGCCCTTACCACTGC	100	69	0R
chr2R	77.2372	100150708|F|0--31:G>C	TGCAGTTTGGTACAACTCCAATTGAAATTGCGGCCCTCCAAAGCAGATGGGATATGGTTGATATGTTAT	100	69	0R
chr2R	77.3907	3905909|F|0--5:T>G	TGCAGTCGGTTCTCGACGGCAACCTCCGCCTCCTGAAAGGTACTAGCAACAACCAGCCCTTACAAGTTA	98.551	69	0R
chr2R	77.4009	100014715|F|0--31:C>T	TGCAGTTTGATACAACTCCAATTGAAATTGCCGCCCTCCAAAGCAGATGGGATATGGTTGATATGTTAT	100	69	0R
chr2R	77.4537	3363605|F|0--35:G>A	TGCAGCAACCGTCCCGAAAGTTGCAGAGATGAACAGCGCGGTCTCACCTTCCAAGGAAATAAACAAGAT	100	69	0R
chr2R	79.2524	3353310|F|0--5:C>G	TGCAGCCCCTCCATCCGCGCCGCCATGGCGTCGCCCACGGCCCTGACCTCCTGCTCGATCCCCGCCGCC	100	69	2R	96.26
chr2R	79.2618	100020260|F|0--65:G>C	TGCAGGGATTACGAGGTGCTGAACCATGAGCTGCTCCAGACGCTGGTGGAGAAAGTCCGGGCAATGGAA	100	69	0R
chr2R	79.2621	100040226|F|0--40:C>T	TGCAGCTCGTCGAAGACCCATGAGTAGTCGCTGAGGCTGCCTTCATCATCACTGCCTGTGCCCCATGGA	100	69	0R
chr2R	79.6138	3906106|F|0--9:A>G	TGCAGCCATAGCAACGTCAGCACGCGGCCGGGAGGCAAGAACTTGCAGCGAGGCGCGGCCGTGCGGCGA	100	69	0R
chr2R	80.1816	3750943|F|0--53:C>T	TGCAGGCACCATGGGATCTCTCATTATCCGGACGAAGAGGCGACCAACCACACCGCGCTGCCCTGCCCC	98.529	68	0R
chr2R	80.6654	5208280|F|0--17:A>G	TGCAGGTGGCGCAGCCAAAGACGGTTGTCCTCGAGCGCGTAGGCGGTGACGTTGTACGGCCCGCCGAGA	100	69	0R
chr2R	80.6654	100011361|F|0--25:T>C	TGCAGACCCTTGTTGTGCAGGTCCTTGGAGCTGCTTATGTCCTCTACAAGTACATGGCCGACAGCGGGA	100	69	2R	98.5
chr2R	80.7589	3750468|F|0--8:T>C	TGCAGCGTTGGGTCCGTGCAGCGGCCTCCTCCTCACGGAGGTTAGGAGAGGAAGATGTGCTCTTCCATG	100	69	0R
chr2R	81.1373	100012035|F|0--38:C>T	TGCAGAAACTCTCTTTTTCCTCTGAAAACTTGTATCCGCTGGGACCACTCACAGCCATCAGTAGAATGA	100	69	2R	96.26
chr2R	81.3632	100085615|F|0--66:A>G	TGCAGCCGTGGCCGCGGACATGACCCACGCAACCGCGAAGCCCAGGTAGATGAGGGCTAGCGCCGCAAC	100	69	2R	96.26
chr2R	81.7194	100001252|F|0--56:A>G	TGCAGAACTCTTTTTCCTCTGAAAACTTGCATCTGTTGGGATCACTCACAACCATCAGCAGAATTGGTA	100	69	0R
chr2R	82.9045	100048538|F|0--59:T>A	TGCAGTTGGGAAGAGCGCGTGCTCTCAGCGTAGCAAAAAATCGAGGTTATTTCCCTTGATCAAAATTAG	100	69	0R
chr2R	82.911	100030443|F|0--60:C>G	TGCAGACATATGACGCTCGAGAAGGTTCAGCAGTCAAGAAAATTTGCTGCATCATACCAACCAATTATC	100	69	2R	99.06
chr2R	84.9756	100124548|F|0--12:C>A	TGCAGCAGTTTGCCGCACGCGGGCGTCAAATAGGGTTCGCCCAGATCGGTGCTGTCAAATAGGGCCTTT	100	69	0R
chr2R	85.5534	100047633|F|0--52:C>T	TGCAGCGGGTCGCGTACCTCAACGTCGGCATCTATCCGTTCACCTCCATCTTCCTGCTCACCTACTGCT	98.551	69	2R	99.06
chr2R	86.2848	100003096|F|0--48:C>T	TGCAGCTCCCGATCGGCAATGGCGACCAAGATCTACATCGTGTAATGCCCCGCCTCTGCTTGCTCTGCT	100	69	0R
chr2R	86.2848	3362014|F|0--48:T>C	TGCAGCTCCCGATCGGCAATGGCGACCAAGATCTACATCGTGTAATGCTCCGCCTCTGCTTGCTCTGCT	98.551	69	0R
chr2R	86.2848	3362014|F|0--55:C>A	TGCAGCTCCCGATCGGCAATGGCGACCAAGATCTACATCGTGTAATGCTCCGCCTCTGCTTGCTCTGCT	98.551	69	0R
chr2R	86.6326	100043075|F|0--64:G>A	TGCAGCAAAAAATAAAAATCCCCAAATCAGGGCTATCGACGCACTGCAAAGTACCTTCGATTTGGAGAT	100	69	0R
chr2R	89.9841	100050297|F|0--24:C>T	TGCAGAATTTTACCTGGGGAACCGCTTGGGATGCACATGAACCCTTAGATAAGTGCCGGCCTCAAGGTG	98.551	69	0R
chr2R	90.3883	100056870|F|0--28:G>A	TGCAGCTTTTCGTTTGAAAAGGCGTGAAGCGGGTCAAGCAGATGAACCGGGGCCATTTAGCAATTGCAA	100	69	0R
chr2R	90.7519	100064867|F|0--61:C>G	TGCAGGTGGCCGCCGTGGCGTTCAACGGCTGCTTGGGGTTGTTCCATCTCGTCCTAGGACTCTGGATGC	100	69	0R
chr2R	90.7519	3365129|F|0--61:G>C	TGCAGGTGGCCGCCGTGGCGTTCAACGGCTGCTTGGGGTTGTTCCATCTCGTCCTAGGACTGTGGATGC	98.551	69	0R
chr2R	91.0999	100079430|F|0--62:A>G	TGCAGGAATTAGTTGCTAAATTGGCTCTGTGTGCCAGTTTTGCTCACAAGATTTAGTTGGTGAATCAGT	100	69	0R
chr2R	92.6442	3745915|F|0--32:A>G	TGCAGCACGCCGGAGCTGAGGAAGCACTACGAACTGCTGGTGGGGGCGGCGAGGGGGAGACCGTGGTCG	100	69	0R
chr2R	92.8571	100056842|F|0--61:T>C	TGCAGGTGTCGCACGCGTTCGGGCCGTGCTCACCGCTGGGAAGCGCGGCCGCAGCGCCGTCTTGGGCGG	100	69	2R	101.86
chr2R	92.9804	3742772|F|0--17:G>C	TGCAGGCCGGAGCGCCAGTCGCCGTCGTACTGGTCGCCGTTGGCGTAGCTCTTCCTGCCGTCGCCGTGC	98.551	69	0R
chr2R	93.0122	5216372|F|0--22:A>G	TGCAGTGCATGGCGATGGTGCTACAAAGGGGAAAGCCAGCAATGATGCTGTGGTGAACGGCGGAGGACG	100	69	0R
chr2R	93.3347	5215769|F|0--30:A>G	TGCAGTGCATGGCGATGGTGCTGCAAAGGGAAAAGCCAGCAATGATGCTGTGGTGAACGGCGGAGGACG	100	69	0R
chr2R	93.3347	3365214|F|0--10:C>T	TGCAGCACCACACCCTCCATCCCCATCCCCCCAACAGTAAAGGAGGCATGGCGGCCATGCATTTCCAAA	100	69	0R
chr2R	93.6635	100041185|F|0--68:C>T	TGCAGCCATGAGAAAACCCCTATGGATGAGGCACTGACCCTTGGAAAGATGGAAGTGGTCGATGCAATC	100	69	0R
chr2R	93.6635	3363526|F|0--68:T>C	TGCAGCCATGAGAAAACCCCTATGGATGAGGCACTGACCCTTGGAAAGATGGAAGTGGTCGATGCAATT	100	68	0R
chr2R	94.9363	3599840|F|0--26:G>A	TGCAGACACGCGCTGATCACGATATTGCAGGAGACAGCGTCGACCTCGGCCATTGCTCTGAATGCCCGC	100	69	0R
chr2R	94.9368	100023968|F|0--15:C>A	TGCAGCAACCCCTTGCCGCAGCATCAACCGGAAGAACTCAAAAGCTTCTTCCTCCCTGCCATTCTGGAC	100	69	0R
chr2R	96.6872	100081297|F|0--38:A>C	TGCAGAACGCGAAAAGCGCGGCGACTCCGCGTTCAGCAACGAACTGCTTCGTAACCGCCCGCCCGTCGG	100	69	2R	101.86
chr2R	97.5114	100031266|F|0--5:C>T	TGCAGCGCCACCTGGATGGGGTGAAGGCCCAAGGTGCTGTTGAGCCACTCCTCCGTGGTCTGGAACACG	98.551	69	0R
[truncated: 9,108 more rows]
