# Supplementary material for: A Genome-Wide Association Study Pinpoints Quantitative Trait Genes for Plant Height, Heading Date, Grain Quality, and Yield in Rye (Secale cereale L.)
Source: Front Plant Sci. 2021 Oct 29;12:718081. doi: 10.3389/fpls.2021.718081 (PMC8586073; doi:10.3389/fpls.2021.718081)
Supplement: Supplementary file 3 [file Table_3.XLSX]

## Sheet: supplTable3
	DArTseqTM SNP ID	Rye 600k SNP ID	ident	overlap	E	score
1	3362508|F|0--29:C>G	AX-99362701_Lo7_v2_contig_65511	98.48	66	3e-26	115
2	5035833|F|0--32:C>A	AX-99395518_Lo7_v2_contig_1354720	98.55	69	5e-28	121
3	100027550|F|0--37:G>T	AX-99521065_Lo7_v2_contig_2896779	98.53	68	2e-27	119
4	3906333|F|0--25:C>T	AX-99521065_Lo7_v2_contig_2896779	98.53	68	2e-27	119
5	3906333|F|0--26:T>A	AX-99521065_Lo7_v2_contig_2896779	98.53	68	2e-27	119
6	3352646|F|0--31:G>A	AX-99738232_Lo7_v2_contig_52636	98.53	68	2e-27	119
7	100030301|F|0--42:C>T	AX-99272083_Lo7_v2_contig_1383048	98.55	69	5e-28	121
8	100030301|F|0--53:A>C	AX-99272083_Lo7_v2_contig_1383048	98.55	69	5e-28	121
9	100019251|F|0--17:G>A	AX-99245250_Lo7_v2_contig_274164	98.55	69	5e-28	121
10	3350465|F|0--30:C>G	AX-99369828_Lo7_v2_contig_4492	98.51	67	8e-27	117
11	100026046|F|0--39:T>C	AX-99778733_Lo7_v2_contig_2870578	98.48	66	3e-26	115
12	3363479|F|0--39:C>T	AX-99778733_Lo7_v2_contig_2870578	98.48	66	3e-26	115
13	100025711|F|0--36:A>G	AX-99785483_Lo7_v2_contig_1378584	98.55	69	5e-28	121
14	3353896|F|0--36:G>A	AX-99785483_Lo7_v2_contig_1378584	98.55	69	5e-28	121
15	100012496|F|0--32:T>C	AX-99249257_Lo7_v2_contig_262352	98.55	69	5e-28	121
16	3352344|F|0--32:C>T	AX-99249257_Lo7_v2_contig_262352	98.55	69	5e-28	121
17	3352344|F|0--8:T>C	AX-99249257_Lo7_v2_contig_262352	98.55	69	5e-28	121
18	3355117|F|0--25:G>C	AX-99777284_Lo7_v2_contig_1353721	98.55	69	5e-28	121
19	100023166|F|0--30:C>T	AX-99418469_Lo7_v2_contig_1381081	98.51	67	8e-27	117
20	100011622|F|0--39:A>G	AX-99234769_Lo7_v2_contig_1360832	98.48	66	3e-26	115
21	3581379|F|0--39:G>A	AX-99234769_Lo7_v2_contig_1360832	98.48	66	3e-26	115
22	100040261|F|0--31:C>G	AX-99304740_Lo7_v2_contig_1361449	98.53	68	2e-27	119
23	100055351|F|0--35:A>G	AX-99567822_Lo7_v2_contig_1367489	98.57	70	1e-28	123
24	3599572|F|0--29:G>C	AX-99390961_Lo7_v2_contig_13220	98.51	67	8e-27	117
25	100019942|F|0--36:T>C	AX-99702940_Lo7_v2_contig_1355354	98.55	69	5e-28	121
26	3908770|F|0--30:G>T	AX-99831436_Lo7_v2_contig_143528	98.51	67	8e-27	117
27	100043977|F|0--60:T>C	AX-99650317_Lo7_v2_contig_65905	97.14	70	3e-26	115
28	3352159|F|0--35:T>C	AX-99650317_Lo7_v2_contig_65905	98.57	70	1e-28	123
29	3364159|F|0--32:T>G	AX-99450875_Lo7_v2_contig_162259	98.55	69	5e-28	121
30	100026290|F|0--32:G>T	AX-99450875_Lo7_v2_contig_162259	98.55	69	5e-28	121
31	3730048|F|0--32:T>C	AX-99795087_Lo7_v2_contig_1345422	98.57	70	1e-28	123
32	3730048|F|0--7:G>A	AX-99795087_Lo7_v2_contig_1345422	98.57	70	1e-28	123
33	100007549|F|0--38:T>C	AX-99782025_Lo7_v2_contig_2877516	98.51	67	8e-27	117
34	100020821|F|0--33:T>C	AX-99822341_Lo7_v2_contig_13018	98.57	70	1e-28	123
35	100021619|F|0--34:A>G	AX-99601384_Lo7_v2_contig_8992	98.57	70	1e-28	123
36	3734104|F|0--35:G>A	AX-99310471_Lo7_v2_contig_3323	98.57	70	1e-28	123
37	100030934|F|0--21:C>T	AX-99853980_Lo7_v2_contig_1439860	98.57	70	1e-28	123
38	3732112|F|0--36:G>A	AX-99604943_Lo7_v2_contig_12005	98.55	69	5e-28	121
39	100033248|F|0--26:G>C	AX-99732595_Lo7_v2_contig_180059	98.57	70	1e-28	123
40	100033248|F|0--46:G>C	AX-99732595_Lo7_v2_contig_180059	98.57	70	1e-28	123
41	3582727|F|0--61:A>G	AX-99553435_Lo7_v2_contig_1354997	98.53	68	2e-27	119
42	100010477|F|0--39:C>T	AX-99246608_Lo7_v2_contig_3191	98.48	66	3e-26	115
43	100005896|F|0--50:T>G	AX-99872924_Lo7_v2_contig_127555	98.57	70	1e-28	123
44	3355564|F|0--37:G>C	AX-99226779_Lo7_v2_contig_263041	98.53	68	2e-27	119
45	100108422|F|0--10:T>G	AX-99831715_Lo7_v2_contig_26629	98.57	70	1e-28	123
46	100024523|F|0--33:T>C	AX-99543818_Lo7_v2_contig_1385832	98.57	70	1e-28	123
47	100073963|F|0--29:T>C	AX-99721936_Lo7_v2_contig_70534	98.48	66	3e-26	115
48	100077977|F|0--38:T>C	AX-99834329_Lo7_v2_contig_3118	98.51	67	8e-27	117
49	3602911|F|0--7:T>C	AX-99820293_Lo7_v2_contig_1379490	98.51	67	8e-27	117
50	5041299|F|0--29:G>A	AX-99520104_Lo7_v2_contig_1359885	98.48	66	3e-26	115
51	100029416|F|0--30:G>C	AX-99779482_Lo7_v2_contig_2876675	98.51	67	8e-27	117
52	100090239|F|0--33:A>G	AX-99264545_Lo7_v2_contig_126643	98.57	70	1e-28	123
53	100130402|F|0--34:G>C	AX-99644516_Lo7_v2_contig_125731	98.57	70	1e-28	123
54	5225225|F|0--38:T>C	AX-99359823_Lo7_v2_contig_2884072	98.51	67	8e-27	117
55	100040789|F|0--6:A>G	AX-99306815_Lo7_v2_contig_69231	98.48	66	3e-26	115
56	100075909|F|0--68:T>C	AX-99534384_Lo7_v2_contig_1345946	98.55	69	5e-28	121
57	3745654|F|0--21:G>A	AX-99845181_Lo7_v2_contig_1359168	98.51	67	8e-27	117
58	3737855|F|0--37:G>A	AX-99308128_Lo7_v2_contig_126519	98.53	68	2e-27	119
59	100022835|F|0--21:C>G	AX-99301629_Lo7_v2_contig_129469	98.55	69	5e-28	121
60	4490167|F|0--33:A>G	AX-99826635_Lo7_v2_contig_144675	98.53	68	2e-27	119
61	4490167|F|0--67:T>C	AX-99826635_Lo7_v2_contig_144675	98.53	68	2e-27	119
62	5209923|F|0--32:T>C	AX-99715113_Lo7_v2_contig_1356977	98.55	69	5e-28	121
63	100139523|F|0--55:C>G	AX-99412986_Lo7_v2_contig_2878567	98.48	66	3e-26	115
64	100021348|F|0--35:A>G	AX-99592261_Lo7_v2_contig_76823	98.57	70	1e-28	123
65	3353941|F|0--26:C>T	AX-99280015_Lo7_v2_contig_1492841	98.51	67	8e-27	117
66	100040117|F|0--38:G>A	AX-99415071_Lo7_v2_contig_1365673	98.51	67	8e-27	117
67	3597356|F|0--39:T>C	AX-99236183_Lo7_v2_contig_4484	98.48	66	3e-26	115
68	100013213|F|0--38:G>C	AX-99743590_Lo7_v2_contig_2874710	98.51	67	8e-27	117
69	3746407|F|0--33:G>A	AX-99476783_Lo7_v2_contig_126081	98.57	70	1e-28	123
70	100015647|F|0--33:A>G	AX-99629118_Lo7_v2_contig_1397019	98.57	70	1e-28	123
71	100081095|F|0--31:T>G	AX-99663618_Lo7_v2_contig_1348461	98.53	68	2e-27	119
72	100022718|F|0--35:C>T	AX-99850303_Lo7_v2_contig_2873782	98.57	70	1e-28	123
73	3748392|F|0--34:A>C	AX-99304539_Lo7_v2_contig_143094	98.57	70	1e-28	123
74	100106564|F|0--6:T>C	AX-99338625_Lo7_v2_contig_1366250	98.57	70	1e-28	123
75	100087230|F|0--29:G>T	AX-99628146_Lo7_v2_contig_134154	98.48	66	3e-26	115
76	3597551|F|0--29:T>G	AX-99628146_Lo7_v2_contig_134154	98.48	66	3e-26	115
77	100022581|F|0--38:T>C	AX-99418110_Lo7_v2_contig_143989	98.51	67	8e-27	117
78	3909618|F|0--29:C>T	AX-99635234_Lo7_v2_contig_1361906	98.57	70	1e-28	123
79	5208104|F|0--30:G>A	AX-99279938_Lo7_v2_contig_2869704	98.51	67	8e-27	117
80	3344814|F|0--11:C>T	AX-99662027_Lo7_v2_contig_1352892	98.51	67	8e-27	117
81	3344814|F|0--38:C>A	AX-99662027_Lo7_v2_contig_1352892	98.51	67	8e-27	117
82	100026990|F|0--19:G>A	AX-99603561_Lo7_v2_contig_61792	98.57	70	1e-28	123
83	100026990|F|0--34:A>G	AX-99603561_Lo7_v2_contig_61792	98.57	70	1e-28	123
84	5212629|F|0--34:G>A	AX-99603561_Lo7_v2_contig_61792	98.57	70	1e-28	123
85	3355782|F|0--10:C>G	AX-99677810_Lo7_v2_contig_63511	98.55	69	5e-28	121
86	3905921|F|0--9:T>C	AX-99669912_Lo7_v2_contig_9949	98.57	70	1e-28	123
87	100052880|F|0--31:T>C	AX-99666076_Lo7_v2_contig_272671	98.53	68	2e-27	119
88	100052880|F|0--47:G>C	AX-99666076_Lo7_v2_contig_272671	98.53	68	2e-27	119
89	3588313|F|0--30:C>T	AX-99623473_Lo7_v2_contig_2869471	98.51	67	8e-27	117
90	100019705|F|0--65:C>T	AX-99371814_Lo7_v2_contig_17017	97.14	70	3e-26	115
91	100076246|F|0--34:G>C	AX-99364237_Lo7_v2_contig_1355066	98.57	70	1e-28	123
92	3365115|F|0--62:C>G	AX-99267194_Lo7_v2_contig_2873514	98.55	69	5e-28	121
93	100084128|F|0--35:T>C	AX-99737119_Lo7_v2_contig_1362567	97.14	70	3e-26	115
94	100187152|F|0--16:A>G	AX-99545837_Lo7_v2_contig_1354755	98.48	66	3e-26	115
95	3360544|F|0--11:T>C	AX-99226092_Lo7_v2_contig_1348162	98.51	67	8e-27	117
96	3892516|F|0--35:A>G	AX-99580238_Lo7_v2_contig_13528	98.57	70	1e-28	123
97	100007052|F|0--29:C>T	AX-99439096_Lo7_v2_contig_1359678	98.48	66	3e-26	115
98	3362248|F|0--29:T>C	AX-99439096_Lo7_v2_contig_1359678	98.48	66	3e-26	115
99	3576606|F|0--13:G>A	AX-99248110_Lo7_v2_contig_77637	98.53	68	2e-27	119
100	3730107|F|0--30:G>A	AX-99714033_Lo7_v2_contig_69707	98.51	67	8e-27	117
101	3597320|F|0--29:T>C	AX-99832538_Lo7_v2_contig_5425	98.48	66	3e-26	115
102	100036426|F|0--32:C>T	AX-99277361_Lo7_v2_contig_2872785	98.55	69	5e-28	121
103	3907314|F|0--32:T>C	AX-99277361_Lo7_v2_contig_2872785	98.55	69	5e-28	121
104	100008281|F|0--34:G>A	AX-99618284_Lo7_v2_contig_1352572	98.57	70	1e-28	123
105	3593239|F|0--34:A>G	AX-99704200_Lo7_v2_contig_9140	98.57	70	1e-28	123
106	100092874|F|0--17:T>G	AX-99615321_Lo7_v2_contig_2876209	97.14	70	3e-26	115
107	5200860|F|0--59:A>G	AX-99615321_Lo7_v2_contig_2876209	97.14	70	3e-26	115
108	100003237|F|0--50:G>T	AX-99788619_Lo7_v2_contig_302488	98.48	66	3e-26	115
109	100196363|F|0--41:C>T	AX-99788619_Lo7_v2_contig_302488	98.48	66	3e-26	115
110	3748282|F|0--17:G>C	AX-99330160_Lo7_v2_contig_74684	98.57	70	1e-28	123
111	3349011|F|0--5:T>C	AX-99781315_Lo7_v2_contig_146948	98.57	70	1e-28	123
112	100065742|F|0--38:C>T	AX-99461292_Lo7_v2_contig_2871592	98.51	67	8e-27	117
113	3740048|F|0--12:T>A	AX-99841288_Lo7_v2_contig_63030	98.48	66	3e-26	115
114	100189937|F|0--39:A>G	AX-99868085_Lo7_v2_contig_284018	98.48	66	3e-26	115
115	100076315|F|0--19:C>G	AX-99621212_Lo7_v2_contig_237399	98.53	68	2e-27	119
116	5222528|F|0--27:T>C	AX-99798202_Lo7_v2_contig_183236	98.57	70	1e-28	123
117	100032184|F|0--63:T>C	AX-99380179_Lo7_v2_contig_361085	98.53	68	2e-27	119
118	3907894|F|0--36:T>G	AX-99290000_Lo7_v2_contig_1350941	98.55	69	5e-28	121
119	100043024|F|0--33:T>C	AX-99310369_Lo7_v2_contig_64137	98.57	70	1e-28	123
120	100024518|F|0--34:G>A	AX-99849517_Lo7_v2_contig_143784	98.57	70	1e-28	123
121	3602982|F|0--37:T>G	AX-99319129_Lo7_v2_contig_1346754	98.53	68	2e-27	119
122	100047370|F|0--56:G>A	AX-99720005_Lo7_v2_contig_206788	98.57	70	1e-28	123
123	3364151|F|0--56:A>G	AX-99720005_Lo7_v2_contig_206788	97.14	70	3e-26	115
124	3362763|F|0--31:T>C	AX-99735524_Lo7_v2_contig_3915	97.14	70	3e-26	115
125	100013603|F|0--35:A>G	AX-99734554_Lo7_v2_contig_2875684	97.14	70	3e-26	115
126	3737929|F|0--35:G>A	AX-99734554_Lo7_v2_contig_2875684	98.57	70	1e-28	123
127	5211378|F|0--34:C>G	AX-99233879_Lo7_v2_contig_1408887	98.57	70	1e-28	123
128	3584587|F|0--26:G>A	AX-99602037_Lo7_v2_contig_187967	98.48	66	3e-26	115
129	100017452|F|0--52:C>T	AX-99481475_Lo7_v2_contig_2872383	98.53	68	2e-27	119
130	100041210|F|0--31:G>A	AX-99773874_Lo7_v2_contig_233559	98.53	68	2e-27	119
131	3889524|F|0--26:C>G	AX-99773874_Lo7_v2_contig_233559	98.53	68	2e-27	119
132	100025289|F|0--34:T>C	AX-99436720_Lo7_v2_contig_274915	98.57	70	1e-28	123
133	100012618|F|0--31:C>G	AX-99544962_Lo7_v2_contig_2868696	98.53	68	2e-27	119
134	100012618|F|0--36:G>A	AX-99544962_Lo7_v2_contig_2868696	98.53	68	2e-27	119
135	100106375|F|0--17:C>T	AX-99619942_Lo7_v2_contig_61947	98.51	67	8e-27	117
136	100026805|F|0--38:T>C	AX-99806774_Lo7_v2_contig_1382182	98.51	67	8e-27	117
137	3599352|F|0--38:C>T	AX-99887249_Lo7_v2_contig_5506	98.48	66	3e-26	115
138	100031299|F|0--46:T>C	AX-99579655_Lo7_v2_contig_1368574	98.48	66	3e-26	115
139	100034456|F|0--33:T>G	AX-99344814_Lo7_v2_contig_1346382	98.57	70	1e-28	123
140	100046424|F|0--29:G>C	AX-99633452_Lo7_v2_contig_3454	98.48	66	3e-26	115
141	100018810|F|0--32:T>C	AX-99647086_Lo7_v2_contig_7003	98.55	69	5e-28	121
142	3743706|F|0--30:C>T	AX-99324125_Lo7_v2_contig_1367017	98.51	67	8e-27	117
143	100025166|F|0--11:A>G	AX-99239793_Lo7_v2_contig_59797	98.53	68	2e-27	119
144	100025166|F|0--34:G>A	AX-99239793_Lo7_v2_contig_59797	98.53	68	2e-27	119
145	100024212|F|0--35:G>A	AX-99744235_Lo7_v2_contig_1346842	98.57	70	1e-28	123
146	3363157|F|0--35:A>G	AX-99744235_Lo7_v2_contig_1346842	98.57	70	1e-28	123
147	100047010|F|0--33:A>G	AX-99252136_Lo7_v2_contig_1366795	98.57	70	1e-28	123
148	100044896|F|0--35:C>G	AX-99747620_Lo7_v2_contig_19449	98.57	70	1e-28	123
149	100017235|F|0--29:T>C	AX-99608409_Lo7_v2_contig_1348155	98.48	66	3e-26	115
150	100079970|F|0--31:T>C	AX-99773299_Lo7_v2_contig_2908155	98.53	68	2e-27	119
151	100031025|F|0--34:G>C	AX-99648138_Lo7_v2_contig_1354400	98.57	70	1e-28	123
152	3909072|F|0--37:A>T	AX-99526183_Lo7_v2_contig_2872868	98.53	68	2e-27	119
153	100049510|F|0--31:T>A	AX-99277072_Lo7_v2_contig_3536	98.53	68	2e-27	119
154	100011726|F|0--35:G>A	AX-99366559_Lo7_v2_contig_4774	98.57	70	1e-28	123
155	100027378|F|0--36:G>C	AX-99739093_Lo7_v2_contig_20234	98.55	69	5e-28	121
156	100016187|F|0--39:G>A	AX-99239858_Lo7_v2_contig_2876440	98.48	66	3e-26	115
157	5203836|F|0--12:T>C	AX-99639778_Lo7_v2_contig_2869116	98.57	70	1e-28	123
158	100018253|F|0--29:C>T	AX-99765892_Lo7_v2_contig_2523	98.48	66	3e-26	115
159	4103835|F|0--19:A>G	AX-99343307_Lo7_v2_contig_158726	98.48	66	3e-26	115
160	100038308|F|0--16:C>T	AX-99759628_Lo7_v2_contig_1367240	98.57	70	1e-28	123
161	3364309|F|0--35:C>A	AX-99759628_Lo7_v2_contig_1367240	98.57	70	1e-28	123
162	5204633|F|0--34:T>C	AX-99483133_Lo7_v2_contig_1458863	98.57	70	1e-28	123
163	100040067|F|0--32:T>G	AX-99637390_Lo7_v2_contig_1370529	98.55	69	5e-28	121
164	5204833|F|0--32:C>G	AX-99546526_Lo7_v2_contig_63470	98.57	70	1e-28	123
165	3363934|F|0--49:G>A	AX-99582484_Lo7_v2_contig_67620	98.53	68	2e-27	119
166	100080399|F|0--50:C>T	AX-99394187_Lo7_v2_contig_153868	98.48	66	3e-26	115
167	100008885|F|0--16:G>A	AX-99480043_Lo7_v2_contig_232588	98.53	68	2e-27	119
168	3362503|F|0--29:C>G	AX-99723759_Lo7_v2_contig_60006	98.48	66	3e-26	115
169	3362959|F|0--35:G>A	AX-99237342_Lo7_v2_contig_126614	98.57	70	1e-28	123
170	100189574|F|0--34:G>A	AX-99607578_Lo7_v2_contig_62499	98.57	70	1e-28	123
171	5202549|F|0--20:G>T	AX-99311573_Lo7_v2_contig_1377609	98.51	67	8e-27	117
172	5224825|F|0--32:G>C	AX-99556026_Lo7_v2_contig_1386278	98.55	69	5e-28	121
173	3343525|F|0--37:C>T	AX-99667586_Lo7_v2_contig_1370995	98.53	68	2e-27	119
174	3352829|F|0--6:T>C	AX-99727470_Lo7_v2_contig_2870131	98.57	70	1e-28	123
175	100019261|F|0--31:A>G	AX-99863657_Lo7_v2_contig_1345503	98.53	68	2e-27	119
176	5216387|F|0--7:A>G	AX-99565606_Lo7_v2_contig_1347546	98.57	70	1e-28	123
177	3576122|F|0--7:A>G	AX-99471042_Lo7_v2_contig_1376374	98.53	68	2e-27	119
178	5206330|F|0--6:G>C	AX-99814873_Lo7_v2_contig_2869537	98.55	69	5e-28	121
179	100030799|F|0--37:T>C	AX-99512885_Lo7_v2_contig_20617	98.53	68	2e-27	119
180	100188291|F|0--31:A>G	AX-99643130_Lo7_v2_contig_1370728	98.53	68	2e-27	119
181	5209108|F|0--34:G>C	AX-99824916_Lo7_v2_contig_233090	97.14	70	3e-26	115
182	100037928|F|0--37:G>A	AX-99360283_Lo7_v2_contig_2869247	98.53	68	2e-27	119
183	100041033|F|0--29:T>G	AX-99405545_Lo7_v2_contig_1369284	98.48	66	3e-26	115
184	3743563|F|0--35:C>A	AX-99316416_Lo7_v2_contig_2872077	98.57	70	1e-28	123
185	100021505|F|0--18:G>A	AX-99425754_Lo7_v2_contig_8941	98.55	69	5e-28	121
186	3883239|F|0--32:C>T	AX-99425754_Lo7_v2_contig_8941	98.55	69	5e-28	121
187	100016240|F|0--36:G>C	AX-99836454_Lo7_v2_contig_2877521	98.55	69	5e-28	121
188	3579802|F|0--13:T>C	AX-99462578_Lo7_v2_contig_65053	98.55	69	5e-28	121
189	3359975|F|0--31:A>G	AX-99344722_Lo7_v2_contig_68063	98.53	68	2e-27	119
190	100076508|F|0--36:T>C	AX-99828605_Lo7_v2_contig_1389620	98.55	69	5e-28	121
191	5205550|F|0--15:T>C	AX-99450204_Lo7_v2_contig_62852	98.57	70	1e-28	123
192	100028244|F|0--45:G>T	AX-99614820_Lo7_v2_contig_241475	98.48	66	3e-26	115
193	100037382|F|0--30:C>T	AX-99292885_Lo7_v2_contig_3190	98.51	67	8e-27	117
194	3597826|F|0--32:C>T	AX-99872235_Lo7_v2_contig_149547	98.55	69	5e-28	121
195	100011787|F|0--34:G>C	AX-99459801_Lo7_v2_contig_3822	98.57	70	1e-28	123
196	100054093|F|0--38:C>T	AX-99629632_Lo7_v2_contig_321563	98.51	67	8e-27	117
197	3364568|F|0--38:T>C	AX-99629632_Lo7_v2_contig_321563	98.51	67	8e-27	117
198	3901002|F|0--30:G>C	AX-99332947_Lo7_v2_contig_2871548	98.51	67	8e-27	117
199	100052058|F|0--32:T>C	AX-99432935_Lo7_v2_contig_1346473	98.55	69	5e-28	121
200	100052058|F|0--51:C>T	AX-99432935_Lo7_v2_contig_1346473	98.55	69	5e-28	121
201	100055677|F|0--38:A>G	AX-99319525_Lo7_v2_contig_8140	98.51	67	8e-27	117
202	3364815|F|0--38:G>A	AX-99319525_Lo7_v2_contig_8140	98.51	67	8e-27	117
203	100009622|F|0--31:A>C	AX-99739102_Lo7_v2_contig_2882828	98.53	68	2e-27	119
204	4093110|F|0--36:T>A	AX-99622218_Lo7_v2_contig_2869505	98.55	69	5e-28	121
205	100150574|F|0--60:C>G	AX-99349093_Lo7_v2_contig_1347130	98.48	66	3e-26	115
206	100042245|F|0--35:T>A	AX-99717755_Lo7_v2_contig_385670	98.57	70	1e-28	123
207	3730911|F|0--23:G>A	AX-99479036_Lo7_v2_contig_1350239	98.53	68	2e-27	119
208	100033928|F|0--36:G>T	AX-99290000_Lo7_v2_contig_1350941	98.55	69	5e-28	121
209	3577425|F|0--35:G>A	AX-99490725_Lo7_v2_contig_91706	98.55	69	5e-28	121
210	100009518|F|0--42:G>A	AX-99488732_Lo7_v2_contig_118503	98.53	68	2e-27	119
211	100013709|F|0--33:T>C	AX-99464052_Lo7_v2_contig_283139	98.57	70	1e-28	123
212	3591257|F|0--33:T>A	AX-99837089_Lo7_v2_contig_63464	98.57	70	1e-28	123
213	100030575|F|0--37:G>A	AX-99262394_Lo7_v2_contig_1548833	98.53	68	2e-27	119
214	100030575|F|0--55:C>T	AX-99262394_Lo7_v2_contig_1548833	98.53	68	2e-27	119
215	100173261|F|0--31:T>C	AX-99222979_Lo7_v2_contig_75160	98.53	68	2e-27	119
216	100039936|F|0--38:T>C	AX-99704683_Lo7_v2_contig_1358883	98.51	67	8e-27	117
217	5043221|F|0--10:T>A	AX-99261051_Lo7_v2_contig_62189	98.48	66	3e-26	115
218	100021901|F|0--12:A>G	AX-99419391_Lo7_v2_contig_1346604	97.14	70	3e-26	115
219	100002373|F|0--33:G>C	AX-99516872_Lo7_v2_contig_1368582	98.51	67	8e-27	117
220	100190873|F|0--34:C>T	AX-99659386_Lo7_v2_contig_302913	98.51	67	8e-27	117
221	3585944|F|0--22:C>G	AX-99292750_Lo7_v2_contig_75580	97.14	70	3e-26	115
222	3593500|F|0--31:T>C	AX-99408455_Lo7_v2_contig_1376825	97.14	70	3e-26	115
223	3743044|F|0--11:A>C	AX-99344814_Lo7_v2_contig_1346382	97.14	70	3e-26	115
224	5044260|F|0--31:A>G	AX-99738669_Lo7_v2_contig_143976	98.53	68	2e-27	119
225	5044260|F|0--67:A>G	AX-99738669_Lo7_v2_contig_143976	98.53	68	2e-27	119
226	5206740|F|0--11:C>G	AX-99644968_Lo7_v2_contig_1350543	97.14	70	3e-26	115
227	5210177|F|0--18:C>T	AX-99262259_Lo7_v2_contig_1345724	98.48	66	3e-26	115
228	5211923|F|0--5:G>C	AX-99505304_Lo7_v2_contig_477960	97.14	70	3e-26	115
