# Supplementary material for: A Genome-Wide Association Study Pinpoints Quantitative Trait Genes for Plant Height, Heading Date, Grain Quality, and Yield in Rye (Secale cereale L.)
Source: Front Plant Sci. 2021 Oct 29;12:718081. doi: 10.3389/fpls.2021.718081 (PMC8586073; doi:10.3389/fpls.2021.718081)
Supplement: Supplementary file 4 [file Table_4.XLSX]

## Sheet: suppltable4 PHT
Trait	DArTseqTM SNP ID	Sequence 5'>3'	Lo7 pseudomolecule	Position (bp)	Lo7 cds	Description	Padj 2011	R2 2011	Padj 2012	R2 2012
PHT	100012457|F|0--21:T>C	TGCAGATAGGCAGCTAGACTATGGGTGTAGATAAGCAGATATCTCACCTTGCTGGGCACACGGCGGCCG	chr1R	1043026			0.032621104	0.048953258
PHT	100012457|F|0--53:G>A	TGCAGATAGGCAGCTAGACTATGGGTGTAGATAAGCAGATATCTCACCTTGCTGGGCACACGGCGGCCG	chr1R	1043026			0.032673384	0.051596918
PHT	100024482|F|0--44:A>G	TGCAGATCCCAGTTTGGAGATTGCATCCTAGCATTTCTATACTCACCATGGTTTTGTAAACTTGATGCA	chr1R	2116394					0.041397392	0.049530077
PHT	100002426|F|0--48:T>C	TGCAGCTCTTCTTGTATGTTGTTGTTTGTACCAAACAACTGTGCTTCTTTGATGCAGATACCACTGCCG	chr1R	5086940	SECCE1Rv1G0001520.1	NBS-LRR-like resistance protein			0.047782154	0.056890285
PHT	100044121|F|0--59:A>C	TGCAGCGAACGTCGCAGTCGCTACGAGAACGGACCCGACACCAACAATCTGTGCGAATGACGTTATTTT	chr1R	5794204	SECCE1Rv1G0001660.1	Ankyrin repeat protein family-like protein			0.026923474	0.097610435
PHT	3356239|F|0--9:T>C	TGCAGGGACTAACGAGCATGGAAGGGAAGTAAAGGGCAAGGAACATACGAGCGGCAGATTGGGCGCATA	chr1R	6765668					0.036408367	0.108192903
PHT	100087706|F|0--40:A>G	TGCAGCTGCTTGTGGCAGCTCCGATGGCCATGGCCCGCTCACCGCGGGCTCTAGAGGAGATGACGCCAG	chr1R	8348763	SECCE1Rv1G0002270.1	Cyclotide			0.042355758	0.153153361
PHT	100001782|F|0--24:G>T	TGCAGCACTGGTTGCGGTCGCACTGGTTGGTTTCACTGCATTTAGCACTATCATAAATGCAGAAGCCGC	chr1R	12390777	SECCE1Rv1G0003080.1	Chitinase	0.024783271	0.056667218
PHT	100040203|F|0--51:A>G	TGCAGTGAAACCAACAAGTGCAGCAACAACCAGTGTTGCGGTCCCACGGGCATATGCGGCGTCGGCAAC	chr1R	12470684	SECCE1Rv1G0003110.1	Chitinase	0.049728823	0.070780895
PHT	100017322|F|0--36:T>C	TGCAGCGGAAGAACAAAATAAAAAGAAATAACCACATGTTACCTTCATGCGGTTCACTCACCTGGTAAC	chr1R	13636314			0.026876605	0.029682272
PHT	100156700|F|0--29:G>A	TGCAGATGAAAGCAACGAAAGTCAAAACAGAATGTCGACATGTCCCCGGCGTGTCAGCCGTCAGCAGCA	chr1R	22341573					0.044377285	0.092922414
PHT	100024806|F|0--63:G>T	TGCAGCTATGGCCACGTACTCGGCCTCACATGAAGAAAGAGCAACAATTTTCTGTTTTTGAGAGCTCCA	chr1R	22852156			0.047397198	0.042908238
PHT	100019932|F|0--62:T>C	TGCAGCTTGAAAGCAATAAATTTTGAACTGGCAATCAGTTGGTTTGTTAGAAAAAATCCAAATGATAGT	chr1R	31470375			0.005266876	0.055158541
PHT	100078320|F|0--60:T>C	TGCAGCGGGGCTTCCCGGCGGACGGGAAGCCGACGCAATCGCGGTTCGCCCCGGTGAGGATGCCCGAGA	chr1R	33953840	SECCE1Rv1G0006460.1	Replicase polyprotein 1a			0.042355758	0.061839407
PHT	100033505|F|0--13:G>C	TGCAGTTCCACGGGTTCCACGGCGTGAAGCAGGAGGAGAAGAAGCTGGGCCAGAAGTTCACCGTCGACG	chr1R	35169625	SECCE1Rv1G0006680.1	7,8-dihydroneopterin aldolase	0.033440816	0.02129319
PHT	5207774|F|0--59:C>T	TGCAGATATAACCTAGTTTATGCCTGCGACAGGATCTCTGAACAGTCGTACTAGTATATCTTATCTTGT	chr1R	35306136					0.040121588	0.060331702
PHT	100003879|F|0--20:C>T	TGCAGCAGCTGCTGGTGAGACCGCTTGCAGTGGGCAATGGCGCCCTGGATGGCCCCCTCCTCCGACCCG	chr1R	38604880	SECCE1Rv1G0007090.1	Membrane-associated kinase regulator-like protein, putative			0.02257989	0.086901997
PHT	100045367|F|0--34:T>C	TGCAGATTGATGTCAATCGATTAAGACTTTTTGGTTAGATATTTCCAAGAGCAAAGGATCAGAAGGTAG	chr1R	40269070					0.03821284	0.035142082
PHT	100030148|F|0--36:G>T	TGCAGCCTGCTGCCGACATTGGGGACCTTGCACCTCGGTCTGTCTATACCATGTGGTCGTACTCGTACC	chr1R	43461668			0.026457728	0.037643763
PHT	100004850|F|0--10:G>T	TGCAGATCGTGGTGATGAACATGCTCATGGGCGCCTCCACCGTCAGCAGCATCCTCTCCACCTACCTCT	chr1R	43827422	SECCE1Rv1G0008040.1	Protein aluminum sensitive 3	0.006735493	0.043184736
PHT	100057985|F|0--35:C>T	TGCAGTACAACGTTGGCCAGCCGCAACGCCGCTGGCAGTACAACCCCCATTTTCTATCCTTCCCTCCAC	chr1R	49246513					0.041990248	0.034957013
PHT	100004289|F|0--31:C>G	TGCAGATGCTCGTGCATCGCGTCCTCTTTCACAGGATCATACAGCGGTTATAGCACGGACAGTTTCAGC	chr1R	49293504			0.017299202	0.061276043
PHT	100043959|F|0--53:C>G	TGCAGCCGCCAGCCGAGCGCTGGTTTCCCTTCTTCCATCGTTCGGATTCTCCACTCATCTCCGTATCCT	chr1R	49737113			0.008034668	0.059440869	0.04382519	0.056742133
PHT	100079928|F|0--29:G>C	TGCAGCAGGTCGACGAAGCACATTGAGCCGTGTTCTCCACCAATGGAGATGGCCTTGTGTGTCGCGTAC	chr1R	49918726			0.006141247	0.057275027	0.022035741	0.090678851
PHT	100013144|F|0--53:C>T	TGCAGGGACATCCGCCTCACCTTCTTCATCATGATCTTCGGCTCCGTCCACTTCCTGCTCTCCCAGATG	chr1R	50414787	SECCE1Rv1G0008850.1	Amino acid transporter, putative	0.001392055	0.101261955	0.038889537	0.046014037
PHT	100029641|F|0--11:A>G	TGCAGACAACCAATCGGTCTTGTTCTTCCTGCTCTGCCCCTTGTTTTAAGAGCATGGAATCAGTTTCAA	chr1R	51926305			0.04135085	0.043746177	0.049883133	0.02401583
PHT	100024532|F|0--45:C>T	TGCAGATATACTAACACATCACCAGATCTGCGTTTATGAAAAAAACGGACATATCACCATATTCGTATC	chr1R	58990363					0.047142815	0.015781866
PHT	100040019|F|0--56:A>G	TGCAGAGACGGCCCCGCCCTCGTCCTCTCCCTCTTCAACCGTGTCTGCCGAGAAGAAGCCGGCATGCGG	chr1R	61812246	SECCE1Rv1G0010340.1	Pentatricopeptide repeat-containing protein	0.038852355	0.016570154
PHT	100040398|F|0--34:C>G	TGCAGTTGTTTGAGTTCGCCAAGAACCACCGTGGCCTCTACCAGAACAGCATTCCATCGACCAGAAATT	chr1R	66901003	SECCE1Rv1G0010900.1	Endoglucanase			0.042355758	0.023858182
PHT	3344875|F|0--26:T>C	TGCAGTATTAAGTACTACTGCTGGTATAGATGTTCTGCTATAAAGAAAAGAGAAAAGCAAAAAGGGCAT	chr1R	68274876					0.048919181	0.042879931
PHT	5215614|F|0--22:G>T	TGCAGTATTAAGTACTACTGCTGGTACAGATGTTCTGCTATATAGAAAAGAGAAAAGCAAAAGGGGCAT	chr1R	68333271					0.034660092	0.083134652
PHT	100042582|F|0--35:G>T	TGCAGTCCCTTTCTTCTTCCTCTCTGAGTACCAAAGTGATGGCGCTGATGCTGCGATCCTCGACGCCCT	chr1R	70772102			0.020934758	0.050647308
PHT	100115683|F|0--67:G>A	TGCAGAAGCCGCGCCCACTGGTCCTCGTTGTCGCTCCCGAAGCTCTTCTTCGTCTCCTCCACCGCCAGC	chr1R	86566724	SECCE1Rv1G0012110.1	Peptide chain release factor 1	0.030037975	0.021005407
PHT	100016369|F|0--40:T>C	TGCAGACTGGAACCTACCTTGAATGGTAACTTATGTGATGTCCCGTGGGATACATACATCTGATAAAAA	chr1R	90248607			0.031905067	0.079220425
PHT	100068611|F|0--6:G>T	TGCAGCGGCGGCCGCCGCAGCCAGCTCAATGCCATTGTCAACGCCATCGTCGACCCCATTGTCAACTCC	chr1R	92755496	SECCE1Rv1G0012470.1	DNA binding protein, putative	0.020738577	0.031550591	0.027585383	0.093885529
PHT	100025451|F|0--22:T>C	TGCAGTGCTGCTTCTGCTTTATTCATTCACAAGTAATAGTAGTCCTACCAATAAAAGATCTATTTGTAG	chr1R	98216928			0.020754472	0.043375773
PHT	100054546|F|0--10:G>T	TGCAGCGATCGCTGCACCTCGCCGCTGCTCGCCATGGCGTCCGCCGACCTACCACTGCTTGTTCAGAGA	chr1R	107956835			0.017122874	0.074357217
PHT	100002328|F|0--33:C>T	TGCAGGCATATCGTGCTGCTGATGGTGCTGCATCAGGCATCCCGCCAGATACCTTAGCTTGCCGTCCGA	chr1R	109080242	SECCE1Rv1G0013930.1	Replication protein A 70 kDa DNA-binding subunit	0.018656585	0.037129561
PHT	100004181|F|0--13:T>C	TGCAGAGCAAGTTTAGGAAAGTCGCCAAGAAGAGCAAGCAAGAGTTCGACGCCATTGATGGAAGGATCC	chr1R	109130700	SECCE1Rv1G0013960.1	Protein CHUP1, chloroplastic	0.026608593	0.041260263
PHT	100025220|F|0--43:T>C	TGCAGTTGACGCATCAATCGCGAGGTTACTCTCATGCAGCACCTCACTCTCAGGGTCCACAGGAGCAAC	chr1R	109280047			0.008297413	0.068806871
PHT	100033460|F|0--11:G>T	TGCAGTCCTGAGAGGATTCATTGGTACTTTTATGAGGATTCACTGGTACTAGAGCAGGGCAGGCAATGA	chr1R	112448945			0.001392055	0.092615615
PHT	100030396|F|0--31:A>G	TGCAGTCCCAGTTCTCGATTGGAAGGGGTTCAAAGATGGCTGTTCGCCTTGGGCTCAACAACAAGCTGA	chr1R	115568398	SECCE1Rv1G0014640.1	Translocase of chloroplast 159, chloroplastic	0.038852355	0.016690958	0.046758176	0.015453053
PHT	100002478|F|0--50:C>T	TGCAGCACAAACAGCATTGTTGTTGAAAGTAGTTCTTGGATGATGGTAAACATACCTTTTCACGATAAG	chr1R	130790597			0.009161921	0.037878348
PHT	100004472|F|0--43:T>A	TGCAGCCACCCTCTCTCTGTGTATAAGCCATTAACAAAGAAACTGGACATACCCTAATCAGTCAGCCGC	chr1R	131458597			0.026881813	0.041294998
PHT	100027072|F|0--60:T>A	TGCAGCATTAGGCACCAAGGTAACTAAGACTGAAACCAGACATTATACATGACAAAGTGCTGAATTGCA	chr1R	136413439			0.048396093	0.01669275
PHT	100025755|F|0--41:G>T	TGCAGTGCTATATATAGATGGTATTGGGAGATATCCCCTCGGAGGGTTTATATGGAAGAAGATACGAGA	chr1R	139463612			0.031599473	0.019890725
PHT	3359777|F|0--12:T>C	TGCAGCTGGCAGTGTTCAGCTACCATAGATAAATAACAACCACAGCTAGGACAAGTGAATAATATACGG	chr1R	145492997					0.045992249	0.128825778
PHT	100069639|F|0--67:T>C	TGCAGCTGCCGGCCATGTCGGTGGAGACGGAGCGGAGCTCCACGGAGTCCTCCGCCGCCTCGGGCCTTG	chr1R	147987691					0.049937811	0.05038746
PHT	100025379|F|0--54:T>C	TGCAGATACCAACACACATAATTTTAAACAAGATGCAAAAAAGAATACTTCCTTTAAAGTTAGTATAAA	chr1R	156260335					0.049883133	0.03809877
PHT	100050769|F|0--23:C>G	TGCAGGGTCTCCTCGCACTGCACCGCGCGCGCTCGCCGAGCGCTGCCACCAGAAGATTCCAACCGAGAT	chr1R	222030587					0.029306841	0.086172226
PHT	100043246|F|0--8:G>A	TGCAGTCAGATCGGGTTGTGAAAATTTCGGCAGCAATGGATGTATCTACCGTCTGGCAACTCGTTGCAT	chr1R	283951509			0.01869926	0.043336311
PHT	100015255|F|0--48:T>A	TGCAGGTGATCAAAGTCATCTGCTTACTTTTCAACAGAAAAACGAGGCTTCGCCTGTTTCGATTCGAGG	chr1R	290787388					0.036408367	0.058620544
PHT	100026046|F|0--39:T>C	TGCAGAAGCAGAAGCAGAAGGCAGCAAAGAATAAGTTAATAATCGCAACTCATCATACATAGTCTTAAC	chr1R	303450466			0.031599473	0.028605276
PHT	100115678|F|0--19:G>A	TGCAGAAGCTCGGGGTGAAGAAGATCCTGGTGAACCAGCTGCACCCCGTCGGCTGCACGCCGTGGCTCA	chr1R	304299593	SECCE1Rv1G0023410.1	GDSL esterase/lipase	0.037413437	0.044491753
PHT	100025711|F|0--36:A>G	TGCAGGCACGAAACCAGAAAGGGAAAAAGTCGTTCCACTCGCGCACGTAATCCTGGAATTGTTGGACCA	chr1R	305447906			0.031124428	0.0236656	0.047142815	0.046823151
PHT	100022667|F|0--47:G>C	TGCAGAAACATTCGCGTTTAGTCTCACAATAGGCCCAGAAGAAATACGTGCCAAAGCCCATTAGATGGA	chr1R	306851559			0.049808564	0.019066784
PHT	100020600|F|0--67:A>G	TGCAGACTTTTAGAAGACTAAACCTTGTTAAATTGCAAGTTTACAACAACAGTAGACCGTAGCGTAGAC	chr1R	314449438			0.020007038	0.033701128	0.044354255	0.05339775
PHT	100002490|F|0--14:G>A	TGCAGCTGATTCATGACACATTTGTATGTAATTGTTCATGTTCAATTGTTTTCTTACTCACCAGGTGAA	chr1R	324546740			0.03789411	0.027970583
PHT	100042224|F|0--34:G>A	TGCAGGGCACTAGCATTAAACCCATCCCAAAAATGAAGCCAAAGAAAAAATATAAATCGGCTCCCCTCT	chr1R	337312115			0.035984059	0.040084499
PHT	100009453|F|0--63:A>T	TGCAGATGGTTCAGCGGGAGACACTTTTCATCTCACTTAATGCGACAAATAGTCGTTGCGGCCAACTGG	chr1R	337767677			0.036063718	0.047178357
PHT	100024832|F|0--18:G>A	TGCAGCACATGAATTTACGAATGACCTTAAATAAGGTTTGGAGTGTGATCTACTTTGTTGCCGTCTTGC	chr1R	354858363			0.022903166	0.064730617
PHT	100073540|F|0--61:C>G	TGCAGTCGAGCCTGTCGGTGGCCAAGAAGAGCCTGGCCCTGGACGAGACGCCGAGGATGTCCGACTCGT	chr1R	365993984	SECCE1Rv1G0026120.1	Myosin-related family protein	0.022903166	0.027377747
PHT	100049994|F|0--48:A>T	TGCAGAGACATCAGAGTTCAGTTGGACCTGAATCAGTTGATTTTTTTTAAAAAAAGGAGGTTGAAACCC	chr1R	369515004			0.047917039	0.019550858
PHT	100031161|F|0--45:C>T	TGCAGACACTCGTTGTTGACATGTTTCTCTTCGCCCTCACATCTTCAGTTGGAATAGAGTGGCATGCCA	chr1R	369759909			0.009168433	0.078856177
PHT	100012496|F|0--32:T>C	TGCAGCTGTGGCATGGCTCCTGGATCAAACTGTACCTCATTCCCACCAGCCTTGCATGTGAACCAGAAC	chr1R	371770387	SECCE1Rv1G0026520.1	Disease resistance protein RPM1			0.034393953	0.10040075
PHT	100040563|F|0--15:T>G	TGCAGGAACGCGCGCTCCGTCCGTCACGCCTCAAATCGAACGCGAAAAAACAAGAACCAAAAACGAAAA	chr1R	382545523			0.03789411	0.033557963
PHT	100004049|F|0--61:A>C	TGCAGCAGGACCTTGAGAATCCTATCTGCCAACCTCAATTCCTCACGGGGCCTCCGCCTGGAACCGAGA	chr1R	383615419	SECCE1Rv1G0027490.1	Pentatricopeptide repeat-containing protein	0.045144301	0.018514556
PHT	100037902|F|0--29:T>C	TGCAGGTGCAGGTAAGCCGCCTGGAAAGATGACGTCGTCGCGAGTGCCGCCTCCAAGGCGGCCTCCTCT	chr1R	384716239	SECCE1Rv1G0027620.1	DUF641 family protein (DUF641)	0.019247123	0.071473284	0.043403403	0.085879248
PHT	100015078|F|0--30:G>C	TGCAGCGTGGGGACTATCAGGCTATTGTGGGCTCGTTGCAATGGTTCGATCTGTTAAGACTCCCGCTAC	chr1R	396165578			0.020676124	0.093020274
PHT	100000847|F|0--6:G>A	TGCAGAGGCCGCAGAGATGACAACAGAAGATGAGCCACTAAACCCTTGAAGCACACCAGCAGCCATTGA	chr1R	397801005					0.043759819	0.08588531
PHT	100014804|F|0--8:A>C	TGCAGAGCAGCGCACACCTGAGCCGCCGCTTCGTCCTTGTCGCCGTCCAGCCTTCCCCTCAGGACCCGA	chr1R	408847340	SECCE1Rv1G0028970.1	Glutathione S-transferase	0.038595852	0.023299759
PHT	100015009|F|0--32:A>G	TGCAGTCACTCTTGATTCCCAGATCCCAGCGAACACAGGTAGACACAGCACTCGTACACACAAATTTAC	chr1R	409723561			0.020996389	0.029772038
PHT	4489594|F|0--26:A>C	TGCAGAGAGCAAAGAGGACATCCAATAAGATGCACGAATTCGGACAATTTACCAAACCTGTATGTACTC	chr1R	412051189					0.047802064	0.077990468
PHT	100069867|F|0--53:G>C	TGCAGGATGGTCGCCGCCCACGTCCACTGCGACACGATCACGCTGGCGATCAGGCCCGTCTTCACGCTC	chr1R	428622528	SECCE1Rv1G0030520.1	Urea-proton symporter DUR3			0.0305698	0.130508813
PHT	100047277|F|0--37:A>G	TGCAGCTCTCCCAGTCGTAGTTCTGCGGCGACACCAGACTGCACACGCAGTGCACGGCCCCGCCCACCA	chr1R	428624003	SECCE1Rv1G0030520.1	Urea-proton symporter DUR3			0.032536202	0.068167973
PHT	100029125|F|0--30:C>T	TGCAGCAAGCCGTACGTACACTCCCATGCGCGCACCTCTCCGCATCCGTTTCTTGGTTCTTACTAGCAC	chr1R	439986539					0.040033647	0.039933125
PHT	100010699|F|0--68:C>G	TGCAGGGCATGCATCCATCATGCATGGTCGCATCCCGCATGCATGGATGCACTAGCTAGCAATTCCTTC	chr1R	454266556			0.03631291	0.023746947
PHT	100037796|F|0--39:C>A	TGCAGCTCAGACCACAGCAAGTATTTCTAAGGTTAAAAACACAAGAGATACATTTTCAAATTTTCACGC	chr1R	460525015					0.023340664	0.098703129
PHT	100105726|F|0--13:G>A	TGCAGCGGCGCATGCTCGGCCAAGGCGAGCCGTTGTTGTCATGCGGCGTACGAATGGTGAGAACGGAAG	chr1R	474976635			0.018845891	0.069619016
PHT	3904535|F|0--15:G>A	TGCAGGTGAGGCAATGTGTTTTCCCATGGCAATCTTTGCGGCGGTGTAGAGGGCTGAGGCAACGAAGAC	chr1R	482196884					0.043759819	0.074699773
PHT	3583451|F|0--5:C>G	TGCAGCGACGAGGAGGGGACGCCCATGGCGTCCTTGAGGAAGAAGTTGACGCCGAGCCAGGGGAAGAGC	chr1R	500402811	SECCE1Rv1G0035700.1	Major facilitator superfamily protein			0.049057756	0.083221959
PHT	100039618|F|0--39:G>A	TGCAGCTCCACTCGGTCCTCTTACTTACATGAACCAGTCGAACTTTACTCACGACCAGGCGCCAGCCAC	chr1R	502261187			0.046902294	0.028859226
PHT	100053820|F|0--19:G>A	TGCAGCTCCAGTGCACCCAGGCATCTGTGGACGGAAGAGTAAGTAGTAATGCATAAATAGCAGCGGTAA	chr1R	506891834			0.007359483	0.049563589
PHT	100030994|F|0--16:T>A	TGCAGTAGCCACAGACTAGCAGGGCGATGCAGGCGACGATGATGTAGAGCTTCCCCTTCTGCTGCTGCG	chr1R	506927243					0.046758176	0.019388379
PHT	100029598|F|0--40:A>G	TGCAGCCAAATCAAACGCGAGAGATTAGGAGGCCGAATCGAACAGCGCAGGAGGACGCGCAGATCTGAA	chr1R	510370135			0.041836717	0.049724797
PHT	100135676|F|0--65:C>T	TGCAGCAAGCGCGGCCGCGGGCCCATCATGGCCAGGACCGTCGCGGCCACCATGTTCGTCGTGCTCGGC	chr1R	512069433	SECCE1Rv1G0036740.1	B-cell receptor-associated 31-like	0.032621104	0.032874144
PHT	100004528|F|0--56:C>A	TGCAGTTTGCTTGGTTTTCTTACTTTGAGGTCTTTGTTGTGCCCTTTCTGCTCCTCCTGCACTTCCCGA	chr1R	539726431			0.007037332	0.053817716	0.019110055	0.117565338
PHT	100060277|F|0--13:A>G	TGCAGCAGTCAGAACGCAGAGATTATTTACTGTGCGCACGCGAATACCTGGCTTTCCTAGCTGGAGTGG	chr1R	539954996			0.031905067	0.046202112
PHT	100012335|F|0--10:A>G	TGCAGGGCACACTTTTGCTGTTTATGCAGAATGGATTTAGAAATAGTTTTGATTTTTGAACAAGGATTC	chr1R	542148685			0.032673384	0.052641331
PHT	100026389|F|0--33:G>C	TGCAGAGCGCCCTGAATCTCCGTCATGTACTTGGTGTCTTCGTCTAACCATCGGGCGTACTCCATGTCG	chr1R	551134976	SECCE1Rv1G0039640.1	transcription factor-like protein	0.048951445	0.028720471
PHT	100075095|F|0--34:T>G	TGCAGGTACTGCACCTTCTCGATTTGCTAACTCCTTTTGGGCTCTGATCTGCGAGTGGGAGAAGTAACC	chr1R	555028546			0.030636698	0.025650345
PHT	100044111|F|0--25:A>G	TGCAGGAACTCAAACCCAAGGCGGCAGTCATGATAACTGCTGCAACCGATGGTGTTTGGGCAAATCTTA	chr1R	555411022	SECCE1Rv1G0039970.1	Phosphate transporter	0.032345596	0.044240554
PHT	100035894|F|0--31:C>T	TGCAGTAGGAAGGGTGGTGGATAGGCAAGTGCAAGCTGCAAGATCTGTTCGAGACCAGTTGTGATGTCA	chr1R	555653065			0.007005324	0.059742299
PHT	100031583|F|0--32:C>T	TGCAGTTCAGCCGTGTCCGTCGGTGTGTCACACGCGTTTCCCGATAAAAGGCAATTATTCTATCCACAC	chr1R	558456964					0.032086606	0.07988065
PHT	100017746|F|0--40:C>T	TGCAGAGCTATAGATAAAGTTGTGAACTGGTAGAGTCCTTCATCATACCCTACGGCCTACGCTACACAC	chr1R	558771588					0.049048359	0.074301343
PHT	100034867|F|0--42:C>T	TGCAGCAAGATGCCGCTGGCCCCATAAATGCTGCACCTGTAGCAGTTCATGATGGCCTCAAAGAACACC	chr1R	562434568			0.039421021	0.032375476
PHT	100021369|F|0--33:A>G	TGCAGTATGAAACAAGCAGGTAGTTCATCACTCAGAAACAAACAGCCCCTATTTTGGTCCACATCCTGA	chr1R	564889949			0.026608593	0.036734565
PHT	100012656|F|0--18:C>T	TGCAGACAGGGCAAAAACCATCCTTGCTCTGGCCTCCCCTGACTCCAAGCCCAGTGATCTCAGAAGGCC	chr1R	566397133	SECCE1Rv1G0040830.1	GTP cyclohydrolase II/3,4-dihydroxy-2-butanone 4-phosphate synthase	0.046878023	0.044539341
PHT	100022037|F|0--14:G>T	TGCAGACCAGATCAGAATAACCCTCATTGATGTGCAATGTGCAATGGCAGTCTTTTTGACTGAGTATAT	chr1R	566702144			0.049330123	0.027914325
PHT	100047166|F|0--22:C>T	TGCAGGCTAGAAACAGCGGCATCTATAAGCAGTACACGAAAGTGGCCGGAGCCTCCTTACCGGCTTCGG	chr1R	569418790			0.037596549	0.027928851
PHT	100015202|F|0--25:C>A	TGCAGTTGGGACGCATCTAGTCGAGCTACTCATAAACCCCCACGGTCAAACCGATCAATTCAGAAACCC	chr1R	579073301			0.036217235	0.029420416
PHT	3893197|F|0--26:A>C	TGCAGCTCATGAGCGAGGCCCTAGAGAGCGCACGTGCACCAGCTCTCGAGGTGCGTCGTTTGATCCAAA	chr1R	587905287					0.027557039	0.127222439
PHT	100034010|F|0--37:G>A	TGCAGCTCCCGTGCCACATCCTCTTCAGCTCCTGCGCGGCCATGCTGGCCTTTCTCGCCTACTTCCCCA	chr1R	588130374	SECCE1Rv1G0043050.1	Glycosyltransferase	0.020602285	0.033112246
PHT	100053404|F|0--26:A>G	TGCAGGGGTGGCCGAAACGGATAGCCACAAGATCGGGTCAAGAACGCACGCGCGCTGACCGCATGCGGG	chr1R	588575159			0.04562555	0.03824885
PHT	3742118|F|0--26:G>A	TGCAGGGGTGGCCGAAACGGATAGCCGCAAGATCGGGTCAAGAACGCACGCGCGCTGACCGCATGCGGG	chr1R	588575159					0.041397392	0.05524262
PHT	100075090|F|0--50:A>G	TGCAGGTCCTCATCGGCGACTGGTTCACCAAGGACCACGCCGTCATGGCCAGCCTCCTCGACGCCGAGA	chr1R	591683248	SECCE1Rv1G0043310.1	L-ascorbate oxidase-like protein	0.028639489	0.064543467
PHT	3576299|F|0--27:G>A	TGCAGCTCCGCCTCGCAGAACGCATCGGAGCAAGCCACTATCTCGTGTAGTGCGGCGGCGCTGTTTGCA	chr1R	595055726					0.026679128	0.120333633
PHT	100001799|F|0--60:G>A	TGCAGCCCTGTTTCCCTCAGATGCAGAGAAGACGGGCAGCAAATAATAGTTTCACTGCTTGGAGCATTC	chr1R	595976057			0.049198885	0.026581667
PHT	100001510|F|0--8:C>G	TGCAGTTCCGAGAGAATATTCGTACTGATTTTCCCATGTCAAGTCATCCAGTCCTCAGTAACAACGACC	chr1R	599740316					0.034066438	0.074128844
PHT	100006292|F|0--33:G>A	TGCAGCATGAAGTTCAGGAGCTTCTGCTTCTCGGTGTGGCGTCCGAACATGATCTTGTCACTGAAAAGG	chr1R	614282579	SECCE1Rv1G0046100.1	NB-ARC domain-containing disease resistance protein	0.04768815	0.01827672
PHT	100068391|F|0--29:G>C	TGCAGCCAGTACGGGTACTGCGGCATGGGGGGCGACTACTGCGGCAAGGGCTGCCAGAACGGCGCCTGC	chr1R	621228621	SECCE1Rv1G0047020.1	Chitinase	0.026881813	0.028921336
PHT	100066441|F|0--7:G>A	TGCAGCCGGGCAACCGGGAGATATTCGTCTCCCTGGGGCTCGACGTCCGCGCCCTGTGGCTCAAGCGCA	chr1R	621300421	SECCE1Rv1G0047070.1	Tesmin/TSO1-like CXC domain containing protein	0.046878023	0.026479156
PHT	100018258|F|0--39:T>C	TGCAGCTTGCCTTTTGGGTCATGCAAAGTTCTTAGATGCTGCTTTAGAGGAGCAAAGGCAAATCATTAG	chr1R	626150623	SECCE1Rv1G0047540.1	Cytochrome P450-like protein	0.045144301	0.02498697
PHT	5047337|F|0--24:G>C	TGCAGTAAAACCCTTGGTGCTGTAGCTATTTACAGAGGCGTACAAAAATGATACATTTAGTCAACCCTA	chr1R	637528827					0.049057756	0.065005045
PHT	100024232|F|0--30:C>T	TGCAGTAATCTCCACCAAGAAGCTCTCCAGCTCTCCCTTGTTCCACTCAGCAAACACATCGGCTATCTC	chr1R	650224487	SECCE1Rv1G0050900.1	6-phosphogluconate dehydrogenase, decarboxylating			0.017592759	0.209342678
PHT	100020809|F|0--40:G>A	TGCAGGTGGTGCACCTCAACTCCTGTCTCTGCGGCGACAGGGACATGATGATGATTGTGGATGCCCCCG	chr1R	650405917	SECCE1Rv1G0050920.1	F-box/LRR protein			0.042233378	0.026528667
PHT	100017643|F|0--32:A>T	TGCAGGCAAAATGCCCTGAGAAGAGACGCACCACTGCTTGACCAAACAATTATTAACAGCTTTAGAAGC	chr1R	651187416			0.022867726	0.027194579	0.043759819	0.018917636
PHT	100079325|F|0--21:T>C	TGCAGCTTTTTTCTCGCCGGTTTCTAGTTGAAGCTTTTCAAATATGTGGTTGAAGCTTTTGTGTCAACA	chr1R	662011908					0.035800104	0.11210206
PHT	100066352|F|0--58:T>C	TGCAGGTGCTGGCCATCCTCCCGTCGTACGCGGGCAAGACGGTGCTGGAGCTCGGCGCTGGCATCGGCC	chr1R	664854563	SECCE1Rv1G0052830.1	Methyltransferase			0.032741705	0.038978548
PHT	100085450|F|0--19:C>G	TGCAGCTGTTCCGCGCGACCCAGAAGGACTACAGCGAGGCGGCGCGGTGGATCATCGGCCTCATGGCGA	chr1R	664908126	SECCE1Rv1G0052850.1	Kinase family protein			0.042207921	0.020420244
PHT	3735139|F|0--47:A>C	TGCAGATATCGTGTGGCAGTCCGTCAGTGCAATCTTCAGGAGATACTACTGTACTTATAACAGCTAGAT	chr1R	669781534					0.046758176	0.09967654
PHT	100038461|F|0--10:A>T	TGCAGTGGAAATTAAATGCCACATAAAATGTATTGAACATTTGTAGGCAATATGTACTTCTCATGGAAT	chr1R	684890540			0.038852355	0.024611218
PHT	100029562|F|0--47:T>G	TGCAGCAGACAACTGCAACAGCCACATGAATACCTGCAATCCAGCGATTCACAGGCCAAGCAATAATGA	chr1R	686917155			0.047066557	0.020303775
PHT	100037213|F|0--59:C>T	TGCAGGACGACAACATTCATGTGTTTGGAATGCATGCAACTGTACTTGTTCTTGTTGTGCGCACAACGG	chr1R	688748795			0.044175601	0.050810678
PHT	3883672|F|0--48:G>T	TGCAGCTGGTATTCGTCGATGGCGAGTTTAGCGTGGGTCACGGGACTCGGATCGTGCAGCTGTTACTGG	chr1R	691651211					0.045073702	0.047057279
PHT	100021599|F|0--48:C>A	TGCAGTCTTACCAGAAAAGCAGCAGCGAGCAGTAGTGCAGTACAACAGCCGTATACATTCCACTGTAAC	chr1R	696112467			0.008836254	0.054604939
PHT	100016960|F|0--12:T>C	TGCAGGGAGGAATGCGCATGCTACTAATCGCTTCACTTATTCTGCGGCACATTACCGACAGCTCTTCAA	chr1R	697538315					0.036537255	0.16660406
PHT	100035105|F|0--18:T>C	TGCAGCGTGGAGTTCTACTAACTTACATATAACACAAGACAGGAAGGAGAGAAACAGCAAATAAACATA	chr1R	699188670			0.022903166	0.038050244
PHT	100080624|F|0--42:G>A	TGCAGAGGAGAAGGCCGGCGCAGACCTGCCAGACAGAAATGAGGCGGTACGTTTCGCGCAAGAAAGGGA	chr1R	702158805	SECCE1Rv1G0058890.1	F-box protein	0.033447774	0.051084633
PHT	100080624|F|0--54:C>T	TGCAGAGGAGAAGGCCGGCGCAGACCTGCCAGACAGAAATGAGGCGGTACGTTTCGCGCAAGAAAGGGA	chr1R	702158805	SECCE1Rv1G0058890.1	F-box protein			0.041397392	0.038486208
PHT	100035101|F|0--39:A>G	TGCAGCTGCTCGAATTCTTCGCAACAGCAAAACTTCTGGAACTTGGATTCTTCGCTACACGAAAGCTGT	chr1R	702158808	SECCE1Rv1G0058890.1	F-box protein	0.043777185	0.063607241
PHT	100046747|F|0--68:A>G	TGCAGGCATTTGCGGGCTAAACTATCATGGGCGTCGCTGTCCGTTTATCGTTACGCTCACACGTCGGGA	chr1R	705127698					0.005037073	0.078155867
PHT	3351951|F|0--28:C>G	TGCAGATCTATCTACAGTGGTAGCAGAGCGGATGATGAGATTGAGGGGGCTTACGTTGGGGCAGTGCCT	chr1R	706961540					0.039375083	0.096169781
PHT	100009613|F|0--7:C>T	TGCAGTTCGAGGTGTTCAGCCAGGGCATGTTCAAGACGGAGCTGTGCAACAAGTGGGAGGAGACCGAGA	chr1R	707635035	SECCE1Rv1G0059740.1	Zinc finger CCCH domain protein			0.044085483	0.06820832
PHT	100042837|F|0--39:C>G	TGCAGCCCAAGCTCATCGCCTGCGGCAAATCCGCCGCGGCGTCCACCATGGCCGTCCGCTTCCTGCTCG	chr1R	707948786	SECCE1Rv1G0059840.1	Auxin efflux carrier component			0.014199536	0.055184569
PHT	100021404|F|0--22:G>T	TGCAGACAGACAGAAACAGGGGGCCTGGCGTCAGTCTTATTTCAGTATTCAATGTAAGTAGCATATACA	chr1R	710411528			0.047474069	0.021893391
PHT	100074948|F|0--23:C>T	TGCAGAAGCAGCGGAGGATGAGGCAGACCTAGCCCGGTCGACCTGGAAGAGCCTTGGGAAGAGACGGCG	chr1R	710993882	SECCE1Rv1G0060630.1	Serine/threonine-protein kinase STE11			0.038161029	0.086855473
PHT	100004448|F|0--23:A>G	TGCAGATCAAGGGCAGAGCACACAACCCCATAGCTCCCCTTGCCAATCACCTCCTGGATCTTGTACCGA	chr1R	712221449	SECCE1Rv1G0060780.1	Mitogen-activated protein kinase	0.03841834	0.020359518
PHT	100039168|F|0--67:G>T	TGCAGCTGCGAATGGTAGAGGCAGCTCGTTAGATGTGCTCCCTTCCTCGGGCCGAAGATTAGAAGAAGA	chr1R	717873635					0.046693776	0.015193169
PHT	100009214|F|0--22:C>T	TGCAGGATGACTTGACGATGGACGACTGGAAACTTGTGATGAAGCTGAAGAAGATACTGAGCATTCCAT	chr1R	723090897	SECCE1Rv1G0063100.1	Translation initiation factor IF-2, putative	0.001392055	0.108746111	0.02172327	0.209470782
PHT	5210247|F|0--51:A>G	TGCAGGAGCGTCTTCGCCCTCGACTCGCCGCCGCTCTGGGGGCTCGAGTCCATCTGCGGCCGCCGCCCG	chr1R	724709028	SECCE1Rv1G0063390.1	Protein phosphatase 2C			0.045346419	0.049791227
PHT	100035974|F|0--15:C>T	TGCAGTTTACCTCTCCTCTGGCTGTACTCAATGATGTAACTTGCCATTTGGGCCTTTGAGTGATATATA	chr1R	726142011			0.037666513	0.022489561	0.046122292	0.018665091
PHT	100034161|F|0--55:C>T	TGCAGCGCCTCGACCTCTCCGCCTTGCCCGCGCTCCAGGTGCTCGACCTCTACGACAACGACCTCGCCG	chr1R	726552747	SECCE1Rv1G0063750.1	Non-specific serine/threonine protein kinase	0.040531029	0.020730626
PHT	3595670|F|0--31:C>G	TGCAGTAGTCGAGGTCGTCGACCACGTCGTCCGCGTCGTAGAGCGCCTCCCTGAGAGCCGCGAGGGACG	chr2R	14490029	SECCE2Rv1G0066510.1	NBS-LRR disease resistance protein-like protein			0.049245452	0.03895396
PHT	3364686|F|0--34:G>C	TGCAGTTCGTGCAGTCGAGCGACGCGGTGGCGCGGGGGCACAACATCTTCTGGGAGGACCCCAAGTACA	chr2R	15022432	SECCE2Rv1G0066670.1	Endo-1,4-beta-xylanase			0.049057756	0.056703496
PHT	3908158|F|0--6:A>G	TGCAGCATGGTGAGGCGAGAGAACAAGGTGGTGCCGGCGGCGCCGCCTCGTGTCGACTTGAGGTCGCAG	chr2R	19788321					0.043759819	0.049197031
PHT	100068090|F|0--57:G>C	TGCAGCTCTTGCGCTCCGTGGCCTCGTAGTAGTAGGTGTCCCAGTCGGCGTCCCTCTGCCCCTCCGTCT	chr2R	19938558			0.037941231	0.042321921
PHT	5206164|F|0--15:C>T	TGCAGCCGGTGCCTCCAAGATCTAGTTAGCGACATGGCATTTGTTGCAGTTTCTGTTTTTACTTTTGAT	chr2R	24934905					0.041397392	0.087785406
PHT	100156413|F|0--41:T>C	TGCAGAAGAAGCTGCACCAGGTCCCGCCCCCGTCCCCTCTCTCGCTCCATCCCATCAGATTTGGGGGAA	chr2R	28029490					0.047772188	0.042044013
PHT	100033248|F|0--26:G>C	TGCAGCTTAGGGACGCTCAAGGGGCTGGAGGTCAACAGGAGCGGGAGCACGATGCTGGGGCTCAAGAAC	chr2R	31901382	SECCE2Rv1G0069940.1	Sulfotransferase	0.046239681	0.024430115
PHT	100028953|F|0--58:T>C	TGCAGCTCCATCTTCATTGGCCACGTTCTTCCCCACGACCACTGCCACTAGGCCGGCATGGTCGAGATG	chr2R	36275146					0.044377285	0.057297112
PHT	100075516|F|0--21:T>G	TGCAGGGGATCACCGACTCGTTGTAGAACGCGGAAAAGGACACGCAGCAGTGGGGCGGCTTGGACGGTT	chr2R	37390385	SECCE2Rv1G0070710.1	Protein COBRA, putative			0.044091456	0.037643031
PHT	100010477|F|0--39:C>T	TGCAGATCTCAAACCCTGACTCGATCGACTCCTAACATACGCAACCAGCTAAAATCACCAGCTTCGTCG	chr2R	40125204					0.02257989	0.122205952
PHT	100077703|F|0--42:C>G	TGCAGGCGCCGCCGTTCTGCGAGGACGAGAGCCGCGTCGGTCCCCGCCGTTCCTGGATAAAAGGCCGCA	chr2R	41473992					0.039253365	0.032600653
PHT	100009254|F|0--39:C>T	TGCAGATACTGACCAGATGCAGACATGTACATAGTCGGCCAATGCGTTTGGCCACACCGTCAAAACCGA	chr2R	43926500					0.046961774	0.031810468
PHT	3345932|F|0--25:T>C	TGCAGTGGTTCTCTCCTCTTTCGCCTTGTTAATTTGTCCACGCCTAGACGTAGCATCTGATGATTACCC	chr2R	44019783					0.037547662	0.061461499
PHT	100020095|F|0--30:C>T	TGCAGAATTGACACTAAAGGTCCTTACGAACCGGGATTAAAGCCCGATTCTGCACTAATGACTACAGAG	chr2R	44284086			0.025695639	0.031262378
PHT	3737607|F|0--30:T>C	TGCAGAATTGACACTAAAGGTCCTTACGAATCGGGATTAAAGCCCGATTCTGCACTAATGACTACAGAG	chr2R	44284086					0.034066438	0.084177011
PHT	100023839|F|0--33:C>T	TGCAGCTTCCTGGAAGCTGCCTGCCGAAACCTTCAAGCATTTATGGTGGCTAATTAATTTCAGTGGTTA	chr2R	45486075			0.048804371	0.055075146
PHT	3365185|F|0--35:T>G	TGCAGCTCCTTGAGGCGCTTGAGCCTCATGCGGTCTCGCCACATGCGGCGCTCCAGCTCCTCGATGCCG	chr2R	48124652	SECCE2Rv1G0071970.1	Ethylene insensitive 3			0.013786461	0.136606614
PHT	5225848|F|0--65:C>T	TGCAGACGGAAATGAGCGAGCAAAAGTGGCAGGCTGGGTTTCGAGAGGACGGTGTGGACAGAGTGCTTG	chr2R	50409718					0.041532565	0.055155139
PHT	3351888|F|0--27:T>C	TGCAGGTCCGTTCGTTGCACAGTCAATTGACACACATGGGTTTCTGAGGCTGCCGTTGCTTGGCTCCGT	chr2R	51683936					0.045246273	0.050278106
PHT	100060757|F|0--15:G>A	TGCAGCATGCATGGAGTTGCCTCACTGCATACGCACGAGAGGCATGGCGTGAGTTCGGTCACCTTGTGG	chr2R	54374204					0.032086606	0.039517165
PHT	100158330|F|0--17:G>A	TGCAGGTGGAGCTCGTCGAGGATGAGCGAGTCGCCGCCGAAGAAGGGCGAGTGCGGGCCCCCGCCCCCG	chr2R	55121731	SECCE2Rv1G0072370.1	RNA-binding domain CCCH-type zinc finger protein			0.04322127	0.100151889
PHT	100074390|F|0--35:G>C	TGCAGCTCCGACGCCGAGATGAAGCCGTCGCCGTCGACGTCGAACACCTTGAAGGCCTCCCGCATCTCC	chr2R	60690688	SECCE2Rv1G0072730.1	Calcium-binding family protein	0.021287462	0.039635102	0.041286533	0.081495001
PHT	100064643|F|0--68:G>C	TGCAGTTCATTAATACCGCCGAAAAAGCAGGGGAAAACGGACGGGGCAGTGTACCAGTGACTGAGCAAG	chr2R	61141897					0.02860321	0.146960356
PHT	100005498|F|0--43:C>T	TGCAGCTAGCTTGAAACCAACTATTACATCATTTCTTAATCAGCTCATTTTGCGATTATTGTAGTAAGT	chr2R	63784017					0.040121588	0.027623222
PHT	100025805|F|0--15:C>G	TGCAGAGCGTGGGTTCGCGTGTTAACACCGTTCGGGCCGAAACGTGGGACGTAAGCAGGCCTAGAATGC	chr2R	64066005			0.015578844	0.034816627	0.036408367	0.024302656
PHT	100042116|F|0--50:C>G	TGCAGCCACCACCGCGCAACCATGGTAATCTCTTACTCCTCTCCCTCCTCCTCGTGTTCCCCTGCACTC	chr2R	68611623					0.042290917	0.045724377
PHT	100002729|F|0--62:G>C	TGCAGGCCAACAACTTCTTTAGCACACGCACGCACAGAGGGCAGCAGGCCGTCGTCCATGCGGCCGATC	chr2R	69812167					0.02860321	0.086241121
PHT	100038244|F|0--50:C>T	TGCAGGGTTGACGCCAACGATAACCGATATGATGCGTAGCGATTGGGTCTCCCGATCTCGTCATGCTCA	chr2R	69900117	SECCE2Rv1G0073610.1	F-box family protein	0.049330123	0.048449699
PHT	100004041|F|0--28:G>A	TGCAGAAGGTGTGGGAATGCCCAGCTCCGCCTGAGCCGTGTTCCCTGATGGCATCTCACATCCTGCCGT	chr2R	73067224	SECCE2Rv1G0073990.1	Nuclear nucleic acid-binding protein C1D	0.001392055	0.080504795
PHT	100004041|F|0--40:T>C	TGCAGAAGGTGTGGGAATGCCCAGCTCCGCCTGAGCCGTGTTCCCTGATGGCATCTCACATCCTGCCGT	chr2R	73067224	SECCE2Rv1G0073990.1	Nuclear nucleic acid-binding protein C1D	0.023565312	0.047769247
PHT	100055903|F|0--44:T>C	TGCAGGGACACTCTTTTCACATGAATGAATTTTACGTACGAACATTTCTTGTCACGGTGGTTGAGGAGC	chr2R	73255671			0.029098386	0.023615425
PHT	100026248|F|0--60:C>T	TGCAGCAAGTAGTGCAACACAACACTAGCAAGGTCGATCGACCGAAGGTAGCTTAGCTAGCAAGGAAGA	chr2R	73625953			0.027422303	0.021705555
PHT	100024974|F|0--17:A>G	TGCAGGCGCGGAGGAGGACTTCAGGCGTGATGCACACGATGAACTCGAGCATAGTATGCGCAAGCACAC	chr2R	74833146			0.020754472	0.032751954
PHT	100008039|F|0--21:T>C	TGCAGCCACAAAAAGATGCGTTGAGGGATCATGCCACCATTCTGTTGATCTACGCCATAAGAAAAGAAA	chr2R	74986209			0.029026366	0.031220961
PHT	100014715|F|0--31:C>T	TGCAGTTTGATACAACTCCAATTGAAATTGCCGCCCTCCAAAGCAGATGGGATATGGTTGATATGTTAT	chr2R	77400939	SECCE2Rv1G0074530.1	Ankyrin repeat protein-like	0.03138245	0.020152044
PHT	100040226|F|0--40:C>T	TGCAGCTCGTCGAAGACCCATGAGTAGTCGCTGAGGCTGCCTTCATCATCACTGCCTGTGCCCCATGGA	chr2R	79262104	SECCE2Rv1G0074720.1	Protein GAMETE EXPRESSED 1	0.007431068	0.076360675
PHT	100047633|F|0--52:C>T	TGCAGCGGGTCGCGTACCTCAACGTCGGCATCTATCCGTTCACCTCCATCTTCCTGCTCACCTACTGCT	chr2R	85553445	SECCE2Rv1G0075780.1	Cellulose synthase, putative	0.037666513	0.041135284
PHT	100003096|F|0--48:C>T	TGCAGCTCCCGATCGGCAATGGCGACCAAGATCTACATCGTGTAATGCCCCGCCTCTGCTTGCTCTGCT	chr2R	86284824			0.008297413	0.106718807
PHT	100064867|F|0--61:C>G	TGCAGGTGGCCGCCGTGGCGTTCAACGGCTGCTTGGGGTTGTTCCATCTCGTCCTAGGACTCTGGATGC	chr2R	90751897	SECCE2Rv1G0076390.1	ABC transporter, putative	0.020232273	0.026887878
PHT	3742772|F|0--17:G>C	TGCAGGCCGGAGCGCCAGTCGCCGTCGTACTGGTCGCCGTTGGCGTAGCTCTTCCTGCCGTCGCCGTGC	chr2R	92980368	SECCE2Rv1G0076640.1	Phosphatidylinositol 4-phosphate 5-kinase 4			0.034066438	0.074762212
PHT	100106259|F|0--14:G>C	TGCAGCCAGGCCCAGGCAGAGTCTCCTAGAACTCCTGCTTGACTTTCTATGGCCGCCGATTCCGGCCGG	chr2R	101734169					0.036209598	0.099712571
PHT	100074736|F|0--21:A>G	TGCAGAAACAAACCCGACCGGACTCAAACCACGAGCGCAGCAGCTCCAAGCACCAAACAAGCAGGAGAC	chr2R	103121111					0.034393953	0.104206666
PHT	100023926|F|0--19:G>A	TGCAGTAAGAGCCTAAGTCGCAAGTACCACAATTCCAACCTTTTTCTATGATATCTGATTCCTCCATCC	chr2R	108231156			0.024857295	0.031573556
PHT	5216773|F|0--15:T>C	TGCAGTCACGCCCACTCCCAACTCCGTGCGACTCGCTGGCCTCCTATCCGTGCAGCCGTACTTCGGCGG	chr2R	113398873	SECCE2Rv1G0078950.1	Gibberellin receptor GID1A			0.048410282	0.045926867
PHT	3747009|F|0--24:G>A	TGCAGGAGAGAGAGAGGGGAGGTCGATAGCTCTGGGCCCATACTACATGGGCCTTACTGTTGACTAGCG	chr2R	114727681					0.042143874	0.084647128
PHT	100085634|F|0--19:T>C	TGCAGCCGACGGGTATTGCTAGTTGTCAGTTCTTTATCCTTGTTGAAGGTGAGAGAGAATGTGGTCAGA	chr2R	116980622	SECCE2Rv1G0079280.1	U3 small nucleolar RNA-associated protein 18-like protein			0.049571521	0.029016477
PHT	100081005|F|0--13:G>C	TGCAGCTCGCCGAGGTGCTCCACGGCCGCGGCCTCGCGGTCACCATCCTCCACACCACGTTCAACGCCC	chr2R	125659989	SECCE2Rv1G0079990.1	UDP-glycosyltransferase			0.041397392	0.03696934
PHT	100128481|F|0--17:G>A	TGCAGGTGCGTGGCATGGAACGCCTCTCTCGGCGTCAGCGGTTCACAGCCTCTCGCCATCGGGCTGCCG	chr2R	130025852	SECCE2Rv1G0080460.1	Calmodulin-binding family protein, putative, expressed			0.035230926	0.058894313
PHT	100157881|F|0--25:C>A	TGCAGGCAGAACCCGTCCGCGCACGCGCGACCAATCAATCAATGCAATTCGAGCCGTGATTCCATCGAG	chr2R	130502559					0.042195081	0.05774188
PHT	100082865|F|0--25:T>G	TGCAGGGTCCAGAGCAGGGGTGAGGTGTAGGTGCGTATATATACACGGTTACGCTCGGTGGTCACGCCC	chr2R	133651877			0.011548184	0.033355337
PHT	3365375|F|0--23:A>G	TGCAGCTTGCGCTTGAGGTGCGTATTCCAGTAGTTCTTGATGTCGTTGTCGGTGCGCTCGGGGAGGTAG	chr2R	133652660	SECCE2Rv1G0080880.1	Myb factor			0.042233378	0.053729763
PHT	100047759|F|0--37:G>C	TGCAGACGGACATCAACATGGCGCGCCGCGCGCTGCGGGAGGCACTCACCACGCTCGACGACATCAAGC	chr2R	133652738	SECCE2Rv1G0080880.1	Myb factor	0.020602285	0.029338662
PHT	100039323|F|0--20:T>G	TGCAGAAGTAGCAAGCACGTTCGATCGGTGGATAATCTTTTAGTAAAACATGGCGTGCCTGCCGCTGGT	chr2R	133802491			0.022903166	0.028605927
PHT	100049603|F|0--23:T>A	TGCAGATTGCTGTCAATGCAACTTTTCGCAACGAAAACGCATTTTCCTTGACGTCTCGTATTCATCACA	chr2R	135482041			0.029714564	0.040921931
PHT	3891720|F|0--18:A>C	TGCAGCAGCACAGCCAACAGAGGAGGAAGACGACCTGATAGCCGAGGCCCTCTACGGGCACAGCGGCCG	chr2R	135482518	SECCE2Rv1G0081060.1	Cell shape-determining protein MreC			0.036271447	0.069677678
PHT	3597369|F|0--18:C>T	TGCAGTACGGCACAAGATCGACCATGGCGCTGATCGGCAGTGACGACACGGCGGCGGTACTCGAGGAAC	chr2R	135821404					0.048337631	0.067613674
PHT	100034406|F|0--26:T>C	TGCAGATCACTTCATCACTAGAACCCTCTCGGATCACACAGCCAATAAACTCAATTAAACGCTAAATCC	chr2R	136752692			0.026417279	0.044238157
PHT	3907587|F|0--43:T>C	TGCAGTGTAATCGGCGAAGGATGGATACAAGACTTGCAAGAGCTACGACTATCAGATGTGTATAATTTG	chr2R	137799594					0.036408367	0.085641425
PHT	100019288|F|0--50:C>T	TGCAGTGTGATGATTTGTGATCGTAGTCATCCTAGCAAGCAGAAACAAAACTGTGATAATAATAATGTA	chr2R	146142358			0.03841834	0.019490015
PHT	5205312|F|0--24:T>A	TGCAGTAATGTTTCCCTCGAGCACTGACACCACTCCGAAGCTTGCCGCTGTCATCTCGTGCTGATTTTC	chr2R	147329336					0.042143874	0.05432464
PHT	100018040|F|0--10:G>A	TGCAGCCACAGTCGATGTCACTGGTGGATCTACAGCTCTGGGTCTTGAAGCTGTTCAGGCTCCATCCAC	chr2R	148080335	SECCE2Rv1G0082120.1	Transposon protein, putative, Mutator sub-class	0.026987142	0.026450106
PHT	100028105|F|0--12:T>C	TGCAGTGCACAGTCCCATTCCCCTGCTTCCTCTTTCCGACTGTCAGCGCTACAGCACCGTCGGCCCTTT	chr2R	148175671			0.007037332	0.071010094
PHT	3745098|F|0--31:C>G	TGCAGTATCCATCATCTTTTCCTGAACTCCCCCAGGAATATTCAGGCAACTTCCTGTAAACTGTAATAA	chr2R	148417935					0.039930166	0.059681521
PHT	100108926|F|0--51:C>G	TGCAGGGGGCGATCAGGAGCGCGCTGGAGAGGAAGCCGGCGGTGCCGGCGGCGGCGCACGAGGCGGAGA	chr2R	154431559	SECCE2Rv1G0082630.1	SPX domain-containing protein			0.036537255	0.100497497
PHT	100006462|F|0--25:A>G	TGCAGGTTTGTGCAGTTTGAGGAATACATTTTGGTTACAACTCATTAGAAGTGAGCCAAACAATTCCCG	chr2R	160637225			0.031124428	0.030261789
PHT	100029739|F|0--47:C>A	TGCAGATAGAGCGGCGTCGGCGCAGCGCCACCCAACCCAACCAGTGGCCAGCAACGACCCATCCACCGA	chr2R	161519554			0.011548184	0.046483746
PHT	3363836|F|0--47:A>C	TGCAGATAGAGCGGCGTCGGCGCAGCGCCACCCAACCCAACCAGTGGACAGCAACGACCCATCCACCGA	chr2R	161519554					0.04641922	0.046285842
PHT	100059813|F|0--33:G>C	TGCAGAATTTGAGCTCGGAAAGAAAAATTACGCGACCGTCTCCGTACGCGGCGCTCGCAGAGCGCGTAG	chr2R	164015256			0.032345596	0.025136144
PHT	100010641|F|0--5:G>C	TGCAGGAACGGGGTTCCTGAAAGTAAAGCAGACTGCCCACACTTCCGCAGTGCCATGAAGTTAACACAG	chr2R	174843361	SECCE2Rv1G0084420.1	F-box family protein-like protein	0.032621104	0.019495373	0.042233378	0.019278549
PHT	100059145|F|0--14:A>C	TGCAGCACCCATCCAGAAACACCATCACAGTCGACCTTCCTCTCCCACATTTCTAATTTTTGGTATTCC	chr2R	174853165	SECCE2Rv1G0084440.1	F-box family protein	0.019586868	0.048359661
PHT	100024313|F|0--30:C>A	TGCAGCAGGACGGTGACGAAGGTGAAGAAGCAGCAGGTGACCAGGGCTTCCACGGCCGGGCCGTAGCGG	chr2R	183375507					0.04382519	0.060840068
PHT	100017315|F|0--49:A>G	TGCAGACCATGATCCTCACGACAGCGGTGCCCCTGGTGGCCATGCAGCTACTGTTCACGGCGTCGGCTG	chr2R	183378117	SECCE2Rv1G0084980.1	Disintegrin and metalloproteinase domain-containing protein 5	0.0361822	0.024205587
PHT	3885623|F|0--52:G>T	TGCAGCCGCGACCAGATAACCCCACCCGCGCTCGCCCCGCCGCCAGCCATCAGACGCACGCGCCCTGGC	chr2R	188201681					0.02257989	0.105520593
PHT	3743123|F|0--59:T>C	TGCAGCGCGCCGTGGAGCCTGGCGGAGCCGCGGAGGCTGTTGCACGCCAGCAGGCGCAGTTCGTCCTCC	chr2R	189385689	SECCE2Rv1G0085340.1	GDSL esterase/lipase			0.041397392	0.083329696
PHT	5201623|F|0--16:T>C	TGCAGGCGCTCAGGGCTACCATCGACAGGTTCGGCTCCGAGAACGTGTGCCTCTGCGGCCACTCCCTGG	chr2R	189385692	SECCE2Rv1G0085340.1	GDSL esterase/lipase			0.041397392	0.083329696
PHT	3745628|F|0--36:G>T	TGCAGAGGAGAGTTCTTTCCTGGTACGTACTGTACTGTACGTGGTATTACATGAAGCGGCGGCTTGACC	chr2R	195175748					0.038443114	0.059711584
PHT	3581436|F|0--55:C>T	TGCAGCGCTGCCAGCCCCTCCTCCCCGTCGCCGAGGAGCTCCTCATCGTCAGCCGCTGCGTCGAGTCGC	chr2R	195176332	SECCE2Rv1G0085670.1	BTB/POZ domain-containing protein			0.042233378	0.052624495
PHT	4093305|F|0--31:G>A	TGCAGGGCGTGGTCGACCTGCTCCCGGTGGAGGCGAGCGGCGCCGTCCCGGTGGCCTTCTACTTCGCGC	chr2R	195176755	SECCE2Rv1G0085670.1	BTB/POZ domain-containing protein			0.036209598	0.072355057
PHT	100050125|F|0--65:G>A	TGCAGGGTCTTCTTCAGCGAGATGATCTCCTGCTCCAGCGCCTGGATCCTGAAGCTCGCCGTCTCGTAG	chr2R	195177739	SECCE2Rv1G0085670.1	BTB/POZ domain-containing protein			0.030709071	0.050995658
PHT	3596443|F|0--66:A>G	TGCAGTGCCACCCACGCGACCAACCTGCTACCACCACTGCTGCTCGCTCACCCGCACGGCCCACTCATG	chr2R	196872522					0.049668644	0.041626754
PHT	3364124|F|0--67:A>C	TGCAGATCACGGACGTGCAGCTGGAGATCATGATGGGCATCCTCAGCGTGTACGCGCTCATCGGGTCAT	chr2R	198638132	SECCE2Rv1G0085960.1	Polyol transporter			0.036286096	0.065923807
PHT	100037435|F|0--9:C>T	TGCAGACATCGGTGTGATGAGCGGAGCGTCGCTGTACATCCAGAAGGACCTGAAGATCAACGACACCCA	chr2R	198748761	SECCE2Rv1G0085970.1	Polyol transporter			0.032115554	0.043006696
PHT	100006349|F|0--61:C>T	TGCAGGGAGAACAAGATGGTGCTAGTGTTGCGTTTAGCTTAATTTCGCTTGGATATAATGACAGAAAAA	chr2R	199038908					0.03003634	0.029302511
PHT	3343505|F|0--8:C>A	TGCAGGTTCAATACTCGCAAGTTGCTTGGTTGCAAGGCGCAGAGGGAAATCTAATGGGAATTATTGGAT	chr2R	199966900					0.02172327	0.140764519
PHT	100023115|F|0--27:T>C	TGCAGCACGTTCTGGTACGGTATGCAATTATGTACAGTAAGTGTCGGTGTACGCATAGTTGGAGGGGGG	chr2R	224231354					0.046398949	0.069331405
PHT	100046222|F|0--14:T>C	TGCAGCTATACCCTTCTCCCAGTCCCAGACTCGAGAATTCTGTGGTGGTTGCTCATGCTCCATATTTTG	chr2R	225822739	SECCE2Rv1G0087420.1	F-box family protein			0.017592759	0.101026366
PHT	100050783|F|0--64:C>G	TGCAGGAGCAGCTCTACACAGTAGCGGCACCCGTGTGTGTGACCAGGCGCCACTGGCCGAGCAGCCTCA	chr2R	227535626			0.031599473	0.018918052	0.039193498	0.020390971
PHT	4490268|F|0--43:G>A	TGCAGCATGTCGTCGGGGCCGCCGTCGGGGTAGTCTGCTTTGCGGGAGCTGACGATGCTGGAGAATATG	chr2R	228522951	SECCE2Rv1G0087580.1	Cytochrome P450, putative			0.0305698	0.089519177
PHT	100080119|F|0--28:C>G	TGCAGGCCTTCGTCCCCGATCTCGAGGTCGCCGTCGCCGACCTCCTCGCCTTCTTCCGGTCCGTCCGAG	chr2R	230234209	SECCE2Rv1G0087690.1	alpha/beta-Hydrolases superfamily protein			0.042355758	0.071175799
PHT	3355587|F|0--24:C>G	TGCAGAACTCAAGGAAAAGGGCTCCGAGCTATATACCACTTTGCTTGAAGGGAAGGTAAGTAAGCTATA	chr2R	230239376					0.010320669	0.21710487
PHT	100080920|F|0--18:C>A	TGCAGGTATCCGACGCATCCTCTCTTCCTTTCTCGTCCTCGGCGCTTTTGCTTTTGGCCTCTGTGCGCT	chr2R	230874670					0.04382519	0.061181712
PHT	100032677|F|0--47:G>C	TGCAGGCTCCAGATCGAGGAGACTTTTGCAGGAGCAAGAGAGAGAGAGAAACAAAATGGATCACTCCAC	chr2R	235305062					0.038988099	0.060933294
PHT	100177768|F|0--35:C>A	TGCAGCGGCAGCGACGACTACGACGACGGCGGCGGCCGCGGCGGGGAGGAGTACGGGATGATCGAGATC	chr2R	237552076	SECCE2Rv1G0088030.1	transmembrane protein			0.037166858	0.062177838
PHT	100188461|F|0--62:C>G	TGCAGCGTGGTGTCGCCGTTGCGGAGGAAGAAGAGCACGCGGTTGAGGAAGACGGCGCCGATCAGCCGA	chr2R	238030505	SECCE2Rv1G0088050.1	Armadillo/beta-catenin repeat family protein			0.038162533	0.061822822
PHT	3598850|F|0--40:A>G	TGCAGATCCTTGGCAGGCAAAATAACAAACGCTGCGAGAAAGATTAGAATACGCAAGCTTCCACGCACG	chr2R	243092818					0.047782154	0.041545256
PHT	100012885|F|0--55:C>G	TGCAGTGATGCACGAGACAAGCATGTGCATGCGCCATTTTGGTTTGCTGGCCGTCCGCGTCTCCTTTCG	chr2R	246931766					0.037848352	0.044130239
PHT	100076215|F|0--26:T>A	TGCAGCAACCCACGGGTTAATCTAGTTAGGTATATATAAAGACTGAAGAGGCAACCAAATACAGCAGTT	chr2R	253276517					0.041532565	0.061010497
PHT	100077977|F|0--38:T>C	TGCAGCGCCATCCAGCCCGGCGCGCGGTGCTTTGATCCTGACACAAAGCTTGCGCACGCGTCTTACGCG	chr2R	254919075	SECCE2Rv1G0089210.1	Glucan endo-1,3-beta-glucosidase 3			0.04572013	0.068645554
PHT	100020706|F|0--12:A>C	TGCAGCTCGCGCATGCACCCATCATCGCCGCCCCAAGCCGCTTCCTCGCCAAGCCACTACCTCGCATTG	chr2R	282469952					0.046549417	0.020009989
PHT	100149524|F|0--31:T>G	TGCAGGAGGCGGGCGGCGAGCTCGTGGAGCTTCTGTGGCAGGACGGGGCCATCGTACCACAGGCGCAGG	chr2R	440531615	SECCE2Rv1G0096520.1	Basic helix-loop-helix transcription factor			0.018555666	0.146634894
PHT	100019290|F|0--22:G>A	TGCAGTCTGCGCCACGAGAACAGAATTAACACGCTCTCACAAGGAAGGAACAAGAAGCGCACAAGAAAC	chr2R	440531618			0.0347373	0.026588234	0.049057756	0.047597275
PHT	3363085|F|0--22:A>G	TGCAGTCTGCGCCACGAGAACAAAATTAACACGCTCTCACAAGGAAGGAACAAGAAGCGCACAAGAAAC	chr2R	440531618					0.019645645	0.126113078
PHT	100012927|F|0--30:C>T	TGCAGGACACGTACAACGCAACAAATTTGTCTTGAGCAAATGTTAGACATACGAGACAGAGACATCCAC	chr2R	442551731			0.039421021	0.022041324
PHT	3362914|F|0--30:T>C	TGCAGGACACGTACAACGCAACAAATTTGTTTTGAGCAAATGTTAGACATACGAGACAGAGACATCCAC	chr2R	442551731					0.014532505	0.148161964
PHT	3745999|F|0--33:A>G	TGCAGTCCCACTGACCCGCAGACCTGCGAGACGATCCGTGGCTCCAACCTGAGCCTGCTCCTTCTGGGC	chr2R	455784780	SECCE2Rv1G0097240.1	Nitrate transporter 1.2			0.037591012	0.061894278
PHT	3743019|F|0--28:T>C	TGCAGCTCTCCATCGCACATCCAACAACTGAAGATGATCTACATGTGTCCCTGTTTGAATTCCGACAAG	chr2R	456084737					0.024526689	0.11629571
PHT	100080819|F|0--12:C>G	TGCAGGGTGGCCCGCGGCGGCGGCGTCTGCGGCCCTTCCCCGCGGCCGCGGACGGGGGTCCACTGGACA	chr2R	462257560	SECCE2Rv1G0097510.1	Werner Syndrome-like exonuclease			0.049057756	0.039948028
PHT	100013807|F|0--60:T>C	TGCAGAAAGAAGTATGCCGACGATCTAGAGAAATACTAGCAAAGAAGGCTTCAGCAACAATTCATACCG	chr2R	501252374					0.046758176	0.044134403
PHT	3743309|F|0--31:A>G	TGCAGCGAGCGTGGGATTGGGCGGATCCAACACGGGTGGGTGGATTGACGAAGAAATATCTCCCTCTTC	chr2R	501956768					0.043759819	0.053176943
PHT	3743277|F|0--28:A>C	TGCAGCTGCAAGCACGATGATCAAGAGAAGGTAGAGACCGGCAGGGCCCATGGAGACTGTAAGAAGAAC	chr2R	514848642					0.049237072	0.06178768
PHT	100017971|F|0--29:T>C	TGCAGCGTAAGCTGGTCTTTCCACCCAAATGAGCAATGCTAGACTTACGGACGCATTCCAGCAAGATTT	chr2R	523875765					0.035720595	0.144594811
PHT	100053547|F|0--27:A>T	TGCAGGCGTGGTCGGCTATGCGGTTGCACGGGGCAGCATTAGTAGCAAGAGCAGCGCGAGCAACACACA	chr2R	523946208			0.045523835	0.014995927
PHT	5227407|F|0--27:T>A	TGCAGGCGTGGTCGGCTATGCGGTTGCTCGGGGCAGCATTAGTAGCAAGAGCAGCGCGAGCAACACACA	chr2R	523946208					0.046549417	0.048706128
PHT	100068019|F|0--67:A>T	TGCAGTACAGTACGCACCACTATTAACGTCACCTGATGATCGATCGATCGATCGATCGATCACAAGTAT	chr2R	532095457					0.045765318	0.01827576
PHT	3602911|F|0--7:T>C	TGCAGTGTCGACGAGGGGATGTGTTCCCCAAAAGGAACCCTAGGAGAGTGTAGATCCGTTTCTTGATCA	chr2R	543338239	SECCE2Rv1G0100550.1	ATP-dependent protease La (LON) domain protein			0.037848352	0.088913202
PHT	5221825|F|0--44:G>C	TGCAGCGGGGTTCGGCTGATGGGGGCCGTGCACGTCGCGCGTGTGACTGAGCGTTCAGCTGTGATGGGG	chr2R	548388341					0.037848352	0.088913202
PHT	3906396|F|0--20:A>G	TGCAGCCACATTGCGGCGACAAAGACGAGCCATCGGTTGGTGGAGAAGGCCCTGAGCCTGTCGGCGAGC	chr2R	549834810	SECCE2Rv1G0100900.1	Nodulin-like / Major Facilitator Superfamily protein			0.036209598	0.073270071
PHT	100038306|F|0--41:G>T	TGCAGGTCCCGGTAGAGCAGCATGTCCAGCATCCCCCGAAGGTCCTGGTCCGTGTCCACGTCGCAGAGC	chr2R	567908608	SECCE2Rv1G0101670.1	Octicosapeptide/Phox/Bem1p domain-containing family protein	0.03138245	0.03804205
PHT	3892972|F|0--54:A>G	TGCAGCCGCCCTAGCTGCCCTAAAGTGAGGGTCCATGACGTCGGCGCCGCTCGCACTCTGTACATGAGA	chr2R	571456111					0.036286096	0.09733449
PHT	100085513|F|0--58:G>C	TGCAGCTACTCTATTCCGTCTCGTGCAACTTTAAGGTCGCACCTTACAGCGGGTACGAGCCCATAGTTT	chr2R	571556603			0.025496751	0.05078865	0.049668644	0.055655484
PHT	3908841|F|0--64:A>G	TGCAGATCTCGGAGCGCCCTGGCTGGCCGGTAAATAAATTGGGAGCGGCGCTGTTGCTTGTGGCACAGG	chr2R	574124375					0.039375083	0.089591546
PHT	100014353|F|0--66:A>G	TGCAGATGCCAGGTCATCTGTTGAAGCGTCACATGGAGGAAACAGAAGTCATGAGGCAGTACCTGTAAC	chr2R	574135899			0.029457449	0.05235485
PHT	3591313|F|0--52:G>A	TGCAGGAGTTCGAGTGGCGCGCGCACCCGTCGCAGCCGGCCGTCGACTTCAAGGATAAGGTGGAGTTCA	chr2R	574423564	SECCE2Rv1G0102160.1	Cytochrome P450			0.024514332	0.100900635
PHT	100016410|F|0--26:G>A	TGCAGCATCCGCGCCACCATCAGCGCGATGTGCGTCGTCCCCATGGCCAAGCCCGGGCAGATCCGCCGC	chr2R	574423567	SECCE2Rv1G0102160.1	Cytochrome P450			0.046479354	0.071407633
PHT	5041299|F|0--29:G>A	TGCAGCCTCCCCGGTGTGGATTCTCCTTCGTGCTGCCGTCCACATTGATCTGTAGCATATCCTGCTTGG	chr2R	574727982	SECCE2Rv1G0102170.1	Retrotransposon protein, putative, unclassified			0.02172327	0.104335447
PHT	100123085|F|0--36:A>G	TGCAGGCAGGGTAGATAGCAATACAATACGATTGACATGGTTTCCGGCTGAAGCGATCGTTGGTTGGTT	chr2R	574740561					0.046398949	0.064614113
PHT	100039710|F|0--32:G>C	TGCAGTCAAATGCTCTACCACTAGGATATGGAGCCAATTGATAAATTAATGCAAATTTAATTTATATGA	chr2R	577574872			0.007148849	0.145818952	0.038136378	0.043563134
PHT	100082846|F|0--29:T>C	TGCAGGTCGGCGGTCGCCGAGTCCCGCACTTCGCGCCAGCCCTTGGAGATGAAGGCGAACGCGCCGCCG	chr2R	581726787	SECCE2Rv1G0102750.1	Digalactosyldiacylglycerol synthase 1, chloroplastic	0.013095616	0.043088706	0.036050492	0.033689648
PHT	3906514|F|0--46:C>T	TGCAGCTGCCGCCGAGGCGTGGTGGGGCGCCCCGACGGCGAGGTCGCGTCCATCCGCGGAAGCGCCGCC	chr2R	583531890	SECCE2Rv1G0102790.1	VQ motif family protein			0.032982999	0.075372134
PHT	3595250|F|0--29:A>C	TGCAGTGCGTCCTTACCATACGACGTCTCATCATCCGTTGCCGTTCATGCTCCCTATGTTGATGGTGCT	chr2R	584784052	SECCE2Rv1G0102860.1				0.036537255	0.097105178
PHT	100000947|F|0--50:A>G	TGCAGGATAACATTGAGAAAGCAATTGTTGCCAAGATTTTGCAGGCCTCCAGTGTAGTACAGCCTCTCT	chr2R	588155939	SECCE2Rv1G0103260.1	Ubiquitin carboxyl-terminal hydrolase	0.032673384	0.028479167
PHT	3602686|F|0--50:G>A	TGCAGGATAACATTGAGAAAGCAATTGTTGCCAAGATTTTGCAGGCCTCCGGTGTAGTACAGCCTCTCT	chr2R	588155939	SECCE2Rv1G0103260.1	Ubiquitin carboxyl-terminal hydrolase			0.046398949	0.04478384
PHT	3740597|F|0--7:G>T	TGCAGTTGGTTAAACGATACTAGTACATGTTCAATAGCCATAAGCGAACGATACGCAACACAGATAGAT	chr2R	590336478					0.03163267	0.088974848
PHT	100109390|F|0--46:C>G	TGCAGGTGGTCCGGCCACGGAGACCTTGGATGCTAGCGTTGGAGTTCTCCACGCGCGTACGTGTACGTG	chr2R	590390458					0.043674955	0.061553226
PHT	100012219|F|0--8:T>A	TGCAGTTTTTTGGGTTCCGAACAGCACGTCAAGCTACAGAGAGCACGCGTCTGGGCGTTCCGTCGAATC	chr2R	592790844			0.021462314	0.068318351
PHT	3579949|F|0--31:A>G	TGCAGCATCTGTTGATGTGTCATGTGGTGATAGATGTGTTCTCTTGTGCTGTTGGACGATCGTCTTTGC	chr2R	607653825					0.0325349	0.183744656
PHT	5045113|F|0--14:C>T	TGCAGCAGCAGGTGCGCCTTCACCTGGGACCTGATGTCGCTGCCCAGCCGGTTCCTGTTCATGTACCGA	chr2R	607729370	SECCE2Rv1G0104510.1	Potassium channel			0.03163267	0.108834913
PHT	100048853|F|0--10:C>T	TGCAGCGTCACCCGTGCTCTGCAAAGGAATGGCGAGCCCAATGGTGGGGACTCCAATCCGCCTCAACAG	chr2R	608164877			0.015578844	0.048658438
PHT	100047679|F|0--41:C>T	TGCAGTTTGGTTCTTCCTCTTGCGCCTTCCATTTGCTACTGCCGTTGGTTTCTTCTGCGGCCTTCTGTC	chr2R	610638031	SECCE2Rv1G0104740.1	PAIR1 protein, putative, expressed			0.036408367	0.063044778
PHT	100053458|F|0--32:G>C	TGCAGCGACCTGCCCAGCTCTAAGTGCACCTCGGCCAAGTGCGGCTACACGTACACCTACGGCGACTCC	chr2R	612637139	SECCE2Rv1G0104890.1	Aspartic proteinase nepenthesin-1	0.03789411	0.036054712
PHT	100047356|F|0--19:T>C	TGCAGGAGATTCTTGCCCGTGCCGTTGGCGACGATGCTATAATGAATGATTGCCATGTTGTCGACTTTA	chr2R	612950922	SECCE2Rv1G0104940.1	Zeaxanthin epoxidase, chloroplastic			0.04322127	0.029786257
PHT	100034671|F|0--59:C>G	TGCAGTTGGCTAGTTGGTAGTACGTGCTGGATGCCATATATGTCCTCTCTCGCAGCTTTCATGCGAGGC	chr2R	618484934			0.031382283	0.042333611
PHT	3743427|F|0--29:C>T	TGCAGTCGAACTAGAGGTCGGGAGTTCGACTCCCCACTCCTGCACTTATTTGTGCATGACATTTAGTTC	chr2R	622706901					0.049966193	0.056882423
PHT	100060621|F|0--67:G>A	TGCAGAGAGCGGCAGATAGGACCTCTCCAGATTGTCGTCGGTTCCCAATGGGCTAGCGAGGCACCGAGC	chr2R	623120926			0.007148849	0.067077318	0.023340664	0.07909817
PHT	100036628|F|0--46:G>T	TGCAGCCAACGGATGCGATCGCACCGCACGACCTATTCGCCACGATGCTCTTCCTTGCTCTCTGCGTCA	chr2R	623858803			0.025206479	0.049985977
PHT	100021314|F|0--21:C>T	TGCAGAGAAGGAAGACCTGCACATCGGGAGAGCATTCGTGCGGATGCTGAACTCCATCCAACGGCTACA	chr2R	625482870			0.019247123	0.098281742
PHT	100108164|F|0--53:C>T	TGCAGGAGCTGGCCGGTGAAGCAGCAGACCGTGGCGACGAGGAGGAGCAGCACCAGGCTGAGCCATCCG	chr2R	627012683	SECCE2Rv1G0105930.1	Amino acid transporter, putative			0.049057756	0.058234618
PHT	3744756|F|0--51:G>A	TGCAGGAGCTGGCCGGTGAAGCAGCAGACCGTGGCGACGAGGAGGAGCAGCGCCAGGCTGAGCCATCCG	chr2R	627012683	SECCE2Rv1G0105930.1	Amino acid transporter, putative			0.049057756	0.057508791
PHT	100061025|F|0--31:T>C	TGCAGGAGGAGCAGACCATCATCCAGCTCCATGCGCTTCTCGGCAACAGGTGATCACCGACCCAACGAT	chr2R	627780006					0.017592759	0.117230337
PHT	3351341|F|0--33:A>C	TGCAGTGACTCGTGAAAAGAAAATCGATAGTAAACCCATTTTATTGCGAAAGAATGCACGCCGATCAGT	chr2R	628465771					0.027922091	0.140051144
PHT	100057874|F|0--15:C>T	TGCAGGGGTGCATCGCCGTTGGGGTGCTACTGATGCTGGTTTCCACCATGGGCGGGTTAAGGAGCATCA	chr2R	629566469	SECCE2Rv1G0106070.1	Amino acid transporter, putative	0.03795815	0.021196282	0.029152255	0.038694597
PHT	100014148|F|0--32:A>G	TGCAGCACTGAGCCACCAGTGGCTGAAACATGAAACTGACCAACTGAACTACCACTGCGACGTTTCAGG	chr2R	629567073					0.03163267	0.03580999
PHT	100011279|F|0--61:C>T	TGCAGTTGGTGGCCAGTACTTTTGTTTAGAATTGGGAATTGTGGGGATGTGGACAATCTGACACCAACA	chr2R	639262126					0.015239025	0.118891872
PHT	100057926|F|0--66:A>G	TGCAGCAGCAGGCACGACTTGCCGACACCTGCACGACCACCCGACCGTCAGCGCGAGCCAGATTCAACA	chr2R	640112755					0.02172327	0.178195044
PHT	100034063|F|0--37:C>T	TGCAGCCCTGTCACGCGCGCCAAGCAGAGCAACCTCGCTCAGCGCCAACGACAAGAGCAACGCGCGTTC	chr2R	640371296					0.046479354	0.055883595
PHT	100021258|F|0--18:T>C	TGCAGCATCAGGCACTTGTCGACGCCGTTGGGGAACGGCCCAGAGAAGCCATTGCGCGACAAATCCAGA	chr2R	645282982	SECCE2Rv1G0107080.1	Receptor-like kinase			0.041773834	0.054038039
PHT	3742745|F|0--67:C>T	TGCAGCCGCTCCGCGAGGCGGCCGCGCTGCACGCGCACGGGCGCCGCCTCAAGCACGGCTCCGCCGTCC	chr2R	648363069	SECCE2Rv1G0107390.1	F-box protein			0.04322127	0.077672354
PHT	3595955|F|0--25:G>A	TGCAGGCATATTTGTTGATGGGTGTGTTGGACGGTGGCCCTTGGCAGATGTGGGGTGCCTCGGCTACAC	chr2R	649277808					0.046980346	0.094582335
PHT	3590123|F|0--44:C>T	TGCAGCAGCACCTCGTAGGTGTCGTGGGCCTCCTCGAGCCGCACCACGGCGCGGCACGCCTCGAGGTCC	chr2R	649321439	SECCE2Rv1G0107480.1	Leucine-rich repeat (LRR) family protein			0.044656294	0.068019597
PHT	3899131|F|0--46:A>G	TGCAGCCTCGTCATCGCCAATAGGAATCGAAAGGATAAGCTCAACAACAATTGGCCCGCGTGGGGCACG	chr2R	654490327					0.041532565	0.109035383
PHT	100112485|F|0--32:T>C	TGCAGGTAAGTGTAGAGAAGATAACAGTCTGATCCCCCATGGCGTGATTGGAATAGGTCGAGACAGACC	chr2R	656977132					0.046398949	0.062319868
PHT	100005840|F|0--68:G>C	TGCAGTCAGTTCTTTTCCACCCTTTCCTATACGAAGACACTGGACCGAAACTGATCTGTTAACCACCCG	chr2R	658350283			0.020738577	0.03363427	0.010050879	0.167970293
PHT	100003334|F|0--58:G>A	TGCAGTAATTCCCAGAAATACAAGGAACAAGTTAAAAGTGCAATTAGTTCATGGGGTTGAAGAATAGAT	chr2R	663047727			0.022903166	0.028791741	0.010050879	0.166877577
PHT	100063037|F|0--19:C>A	TGCAGCCGTAGCACGCGCCCTTCACGTCCTCCCCGCACACCTCGCACCTGGCGTTGCCGCCGCCAGCGC	chr2R	664363792					0.024544541	0.137390987
PHT	100011239|F|0--7:C>T	TGCAGGTCATTGCAGCGGCATAGGCACTAGGCGTTGACCTGCCCGCGATCGAGCTGGGACAAAGCGAAA	chr2R	667897908					0.035230926	0.087745011
PHT	3365048|F|0--14:T>C	TGCAGCATCTCGTGTGTTTGGAGCTCTTCGTTTGGCTGGCTAGCATGGAACGGGGATGCGGCCGAGCAC	chr2R	668467842					0.042233378	0.104445698
PHT	100013063|F|0--42:C>T	TGCAGCTAGGCCAACTTCTGGTATGCAGCTTGTTTCATTAGTCGATTGATCCTACCCCACTTCTTATCA	chr2R	673203192					0.02172327	0.039805269
PHT	100024196|F|0--38:G>T	TGCAGTTTACCAAATGTACCAATCAGGACGTCTGCTGAGCAGCTACTGTAATATCAGTTTTTTAAGACG	chr2R	673267674					0.015239025	0.128881308
PHT	100018521|F|0--9:A>G	TGCAGCGAAAGCGCCACAGGGCAGCTCAGGAGCGCTGGGAACACCGTGTCAGCTGGGCACACGGCATAG	chr2R	673275513			0.002182365	0.086350723
PHT	100050986|F|0--64:T>C	TGCAGCGACAGTCCACGTGGTCGCACGCAGGAGGAATGCTGTTGCGATCCTGGTTCGTGATGGATGATC	chr2R	674011372					0.049057756	0.019906286
PHT	100023751|F|0--13:T>A	TGCAGATCGCCACTGCCCAATACGTACGGGCACTACCCAATGCGTACGGCAATCTTCATCGTCTCGAGC	chr2R	674404896			0.043160781	0.016949725
PHT	3352506|F|0--8:G>T	TGCAGAAGGCCTGTTTTCTGACGGAGGAAGGAGCTAGCACACAAGACAGAAGCTCTACAATCTATCCGT	chr2R	675427417					0.036286096	0.065245014
PHT	100050311|F|0--58:C>A	TGCAGTGATGTGTGTACTACGTGGTTAAGCTTGAGAGTTTGCGTTTTGTTTTGATAGGCTTGGACTGGA	chr2R	678026429					0.040033647	0.037966349
PHT	100019041|F|0--28:A>C	TGCAGTACTGCTAGCTAGTCAGCTCACCAAAAAAATATACTACGCGTCTCTTGCTCGTCAGCCAATCGC	chr2R	681728847					0.02172327	0.052496764
PHT	100035358|F|0--23:G>T	TGCAGGACCCTCCCTCTGACTTAGATGATGCCGATCTTGTTGGCCACGTCAAGAGCATCGTAGTCTGGT	chr2R	684845472			0.031995083	0.022919937	0.032086606	0.027874402
PHT	100039401|F|0--18:C>T	TGCAGTAGGCGCTTGTGTCGTGGTTTCTTATGTTATCGGAGTTTTGTAGTTGTTACTTAGCAAAGGGGC	chr2R	684845475					0.032402488	0.090743463
PHT	5037641|F|0--21:G>C	TGCAGCCGCGGCGCTGGCGGCGGCGCTGGGAGTGTCCTTGGATCGTACGCTGTTTCTGTGCAGGTAAGC	chr2R	686903601	SECCE2Rv1G0110070.1	Gamma-tubulin complex component			0.025656241	0.08923899
PHT	100025478|F|0--16:C>T	TGCAGATTCAAACCAACTCCAGGCATCAGAGACCACCCGAGGCAATAGAACCACGAGGCAACCGTCCAC	chr2R	686903604			0.045144301	0.039082226
PHT	3576891|F|0--16:T>C	TGCAGATTCAAACCAATTCCAGGCATCAGAGACCACCCGAGGCAATAGAACCACGAGGCAACCGTCCAC	chr2R	686903604					0.025656241	0.08923899
PHT	100003936|F|0--32:G>T	TGCAGGGTGGCCACCCAGGTGCTCCACTTGTAGTCGTAGTACCTGTTCACCTGGTCCGACAGCCCGAGA	chr2R	689854646	SECCE2Rv1G0110460.1	transmembrane protein, putative (DUF247)			0.049057756	0.035369397
PHT	100017886|F|0--29:T>G	TGCAGGATACTGGTAGAAATCTATTTTGGTTTGCCTTCGTTTTCAGAGAAATGGACACTACGACAATCC	chr2R	690565580			0.02219447	0.037883136	0.042207921	0.019796556
PHT	100017886|F|0--31:T>C	TGCAGGATACTGGTAGAAATCTATTTTGGTTTGCCTTCGTTTTCAGAGAAATGGACACTACGACAATCC	chr2R	690565580			0.016976318	0.044416741	0.036271447	0.087203252
PHT	3359868|F|0--59:C>G	TGCAGCTGCTGCGCGATCCTGATGATGTTCACCTGCACGCACGCACACAGCATTGTCATCTCCGTTCGC	chr2R	692822390					0.034066438	0.110836172
PHT	5037465|F|0--38:T>G	TGCAGCGTGTACGTGGCGGCCGCCAGGATGTGGCGGAATGGGCGGTGCGGGCAGAACTCCACCGCGTCG	chr2R	692828463	SECCE2Rv1G0110660.1	WD repeat-containing protein			0.049048359	0.065949011
PHT	100005171|F|0--12:T>C	TGCAGAAATCAGTACATATCCAGAATTTTCATCCATTCCACAGTCATCATCTCAAGATGGATTTTCTGT	chr2R	694397706	SECCE2Rv1G0110830.1	Zinc finger (C3HC4-type RING finger) family protein			0.046549417	0.032214731
PHT	3745833|F|0--5:C>G	TGCAGCACGCTCTTCTGCCCGTGCTCGTGCCCCTCCACGGCCCCTTCAGGATGGTACACATCGGGCACG	chr2R	698042095	SECCE2Rv1G0111120.1	Caleosin			0.046549417	0.124818643
PHT	3892189|F|0--21:T>C	TGCAGCATCGAGGATCGTCGCTGGCAAGATGTGGACGTAGGCCGCGCGCCCCTGTCTTGATCGATTCCT	chr2R	698052401					0.021998075	0.140550566
PHT	100128024|F|0--37:T>A	TGCAGTTTTCAGTAATCAAATCGTACGGTTCTGCAAATACACACAAATCAGACGTGAATTCTGTGCTTA	chr2R	699055616					0.041943556	0.137816087
PHT	100006910|F|0--22:C>T	TGCAGCAGAGGCAGCAGGGCTTCGGTTACATGCTTGATGCCGTAGTAGTTGGTCTGCACGCCTTCCTTT	chr2R	702585627	SECCE2Rv1G0111650.1	Short chain dehydrogenase/reductase	0.02219447	0.0280507
PHT	100009789|F|0--67:T>C	TGCAGAGATCCAGCCAGAGACCATGCCGCCTCCCAACCGAGCCATGCCGCTCCTTCTCCTGCTCCTCTT	chr2R	702877333			0.007148849	0.070409541	0.040275568	0.077665744
PHT	100023588|F|0--34:T>C	TGCAGGGGCGCCATGGTGACGTTGACCTGCATGGTCTGGCCGTCGAAGTCCACCCACACCTGCATCGGC	chr2R	702878016	SECCE2Rv1G0111710.1	Lectin receptor kinase	0.025715283	0.039118454	0.027867498	0.047192201
PHT	100017855|F|0--25:A>G	TGCAGGCAAGTGAGCGAAACAGACGACCCGTCAGTCCTTCAGATTCAAAATTTGAGCAATTTTGGCGCG	chr2R	706758049			0.035415997	0.027430372
PHT	100014173|F|0--36:T>C	TGCAGAATCATGAAGAGACATATGTTCAGTGTCTAATTCGCAACTGAAGCTACAAATGAACAGGAAAGA	chr2R	707352761					0.046549417	0.06233025
PHT	100034759|F|0--52:A>G	TGCAGCAGCACTCTTCTGGACATAAGCAAGAAGCTGGACTCAGTTTCCGCGAAACATATCTGAATCAGT	chr2R	708913962			0.041671813	0.052099695	0.042143874	0.051091386
PHT	100049227|F|0--67:T>G	TGCAGTTCCTGCCGTCCTGCTCAATCGGGGAGGAGAGTCTGCAAGAGCTCCGCGAGTTCGAGTTGGCTG	chr2R	710920763	SECCE2Rv1G0112540.1	Glycosyltransferase	0.005266876	0.074725217	0.032741705	0.034846741
PHT	100017225|F|0--12:G>C	TGCAGCCCTCTGGCCTGGCTCTTGAAAAGAGGGGGAGTGAAACCTATGATGGACACCAATTGTGGCAAT	chr2R	711551317	SECCE2Rv1G0112580.1	formin homology 2 domain-containing protein / FH2 domain-containing protein	0.022625156	0.041329326
PHT	100052596|F|0--62:C>G	TGCAGCTCGAAGAAGCCATGCTGGATGCCGGCGATCTTAAATGCCTCCGCAGCATTAACCTTCGTACCA	chr2R	715958886	SECCE2Rv1G0112840.1	Phenylalanine ammonia-lyase	0.039421021	0.028873076
PHT	100075392|F|0--18:T>G	TGCAGAAGAAGGTGAGGCTCTTCTTGGAGACGAACGGAGGGAGAGGACAGGTTAAATAGGGAGCGCAGC	chr2R	716348265					0.049365921	0.031915915
PHT	100015687|F|0--30:T>C	TGCAGCAAGAGATCCATGGCAGCGCCCCGCTGCCGTTGCACGTCCAGCGCCGGCTCGGTGGTGGCCTCC	chr2R	718506622	SECCE2Rv1G0113030.1	AP2-like ethylene-responsive transcription factor SNZ			0.045477672	0.046971707
PHT	100033311|F|0--12:T>C	TGCAGAGAAGAATTAGCATAACAATTACTACTTGTCGATCAAATGAAATGAACCAACTGTGCCATACTA	chr2R	719171687			0.007118804	0.050434969	0.036516738	0.067035493
PHT	100020563|F|0--56:C>T	TGCAGCTGCACTTGCTTAGTTTGCCACGCAACACCTCCCAAAGAAGCAACGAAATACCAGTCTCCAGAT	chr2R	720184966			0.036502039	0.038939195	0.045765318	0.043746187
PHT	100022309|F|0--68:G>T	TGCAGCTAGCTCCTGCGTGAGTAGTGAATTATTTCAGATGTTGCCTGGTTACTCTTGTGAAGCTACGGG	chr2R	720193112			0.00862336	0.068973126
PHT	100037513|F|0--39:G>A	TGCAGTTGTGGCATCGCTGTCTCATAAGGATACACGCCTGCTACTGAATTAGCAATATCCAAAGTTCCA	chr2R	720377084			0.026457728	0.029578158	0.045073702	0.03136878
PHT	100039983|F|0--28:A>C	TGCAGGCATCGTTGAATATGTGTGGCGAAGGATTCGCAGATGTGGAAGTCCATGCATGCGTACTGGTCC	chr2R	724408837			0.031599473	0.032539802	0.014532505	0.060018699
PHT	100015204|F|0--35:A>G	TGCAGATCGCGCAGCATCTGCATGAAGTCGGGCTGATCGAGGTAGGCGCGGGTGGTGGGGTCGGCGGCG	chr2R	725082022	SECCE2Rv1G0113710.1	Hsp70-Hsp90 organizing protein 1			0.046479354	0.045320339
PHT	100083983|F|0--67:T>G	TGCAGCAAAGGCGCTGGCCATTCTTGTTTGTTGGGAGATTTGGCGCGAGCGAAATCGACGGATTTTTTA	chr2R	726744468					0.042195081	0.054106176
PHT	100028410|F|0--8:C>T	TGCAGACACGCCTCTTCAGCACATAGACTTCTGAATTCAGCAGTCATTTCATGGGCTAAATTCGACCAG	chr2R	734398008	SECCE2Rv1G0114420.1	HAUS augmin-like complex subunit 6			0.024526689	0.038417902
PHT	100080477|F|0--60:A>T	TGCAGCCCAGGCCACAGTTATCTGCGTTTCCCTATCGGCCATCGCCGCAAGGAGACAGGAAAGGAGGGC	chr2R	737194709					0.024884389	0.055942157
PHT	100036502|F|0--66:T>C	TGCAGCTTGCACCAGTTAATCCTTACCTGAGCAGATCATAATGTAGAGGTCGATGTCCATTCTATATCT	chr2R	738355933			0.04870884	0.02685301
PHT	100006331|F|0--5:C>T	TGCAGCAACATAAACACAATCTGAGGTTTCGGGAGGAAAAAGCTCATGTTTGAAATGCCTGTGAAAATT	chr2R	749073800			0.043732766	0.024812326
PHT	100033907|F|0--17:A>T	TGCAGGACTGCATATTTATTTGGGGTAGAGGACTGTATTAATACTGACACGGCTTATGCAATGGTCTGT	chr2R	755714411			0.033584411	0.03025202
PHT	3743276|F|0--26:G>C	TGCAGACATGCCGGCGACAAGATCTCGGCCGCAGGAACAAAATCGCAGGATTGAGATTTCGCTGCCGAG	chr2R	757398468					0.043759819	0.048388225
PHT	3596352|F|0--66:C>A	TGCAGGGGTCGGGCGTATGTGTACCAGTGGATGTGCGTGCGTGTGGGCACTGTGGCGTTCAGCGCCCGC	chr2R	758762216					0.041085719	0.077170622
PHT	100018522|F|0--57:T>C	TGCAGCTGACGGTGGGGCGGAGCGGCGGCCTGCGGAGGCTGGAAGAGCTGGTTGGTGTGAAGGTCGGGG	chr2R	758981297					0.037848811	0.093398493
PHT	100035295|F|0--34:A>G	TGCAGTATATGCACGTACACCTCTCAGGAAAAAAAATGTTTATACACGTACACTTTGTGCAGTGAGAGA	chr2R	762384610			0.04472573	0.050880279
PHT	100061071|F|0--44:C>G	TGCAGCAGCGGCGAGCTAGGCAACAAACAGGCTAAACAGCAAACCAGCCCGCTCCTCCTCGCTGTCACA	chr2R	763790605			0.02909966	0.039549902
PHT	100017584|F|0--54:G>A	TGCAGAGCAGCACAAGAACAGATTCACTGATCACATCTCAAATTTTCACAATTCGAGACTGTGATGAGA	chr2R	764871827			0.025983375	0.062908969
PHT	100082729|F|0--52:C>G	TGCAGTGCGTGGCCATCTCGTACAACGTCGGGTGGCTGGACCCCGCGCACCACCTCCTGCGCGACAACG	chr2R	766439976	SECCE2Rv1G0116650.1	Glycosyltransferase	0.005777256	0.081197477
PHT	100079738|F|0--18:T>G	TGCAGGCACATGACGCAGTCGGGGCGAGGCGCCTCGATCGGTTCACATAGACGGATTGATATGCATGGA	chr2R	772269652					0.049079515	0.038086731
PHT	3593075|F|0--5:C>T	TGCAGCCGTTGCGGTTGCGGGGGAGGAGGGTTCGTCGCTTGCTTCCAAGGGTCCGACGTACTACGTCAT	chr2R	773764062					0.049048359	0.073467768
PHT	100015396|F|0--60:G>T	TGCAGCTGCCCCGCTCCTTCCGTTTCTAGCTAGCCCACCATCAACTTGGATCTTGGCTACGCCCATGTC	chr2R	775215800					0.047190518	0.037475627
PHT	3346581|F|0--11:A>G	TGCAGGATGTGATTCGTGCGCAGCTCCTGCACGTCCTCCACGCGGTCCGTCACCATGCCCAGCATGCAG	chr2R	775521143	SECCE2Rv1G0117740.1	transmembrane protein, putative (DUF247)			0.049138671	0.052002899
PHT	3905929|F|0--26:G>A	TGCAGCCCATAGCAGGTCACGTCGGCGCGCACTCGCCTGGCTGACTAACCCTCCCCCTCCTTGCAGCAT	chr2R	781350995					0.049572303	0.086969593
PHT	4489905|F|0--49:T>C	TGCAGCCACCGGCTTCTCGACGACTGCTGTCTGATCCGCCATCCCGTCCTCCTTCGTTTTCATTGCAGA	chr2R	782847783	SECCE2Rv1G0118490.1	Sodium channel protein type 3 subunit alpha			0.049057756	0.041784073
PHT	100078979|F|0--7:A>G	TGCAGCTACTACTGGTGAGCTGGTCCTGCGAGGTGCGCGAGCAGGGATAGGCCGGCGGCGTCGGGTGCG	chr2R	783644029					0.049658874	0.047531365
PHT	100084562|F|0--38:C>G	TGCAGCTCCCGCAGCTCGACGCCGTCCACGGCCGCCTCCGCGAAGTCCACGCCGCGGCCGCTGCACAGC	chr2R	788209633	SECCE2Rv1G0119080.1	Shikimate/quinate hydroxycinnamoyl transferase	0.048545541	0.032527386
PHT	100014996|F|0--44:G>C	TGCAGCACACACAAATTATTAGGCGATTTCAATAAAATTCAAATGGAAATTTTGGTACTTTGACCTAAA	chr2R	794007642			0.026400131	0.038642696
PHT	100080908|F|0--47:A>G	TGCAGGCGCACAACGACGCGCGCCGCGAGGTCGGCGTGGCACCCCTGAAGTGGAACTCGACGCTGGAGC	chr2R	798574739	SECCE2Rv1G0120390.1	Pathogenesis-related protein 1	0.048804371	0.049214996
PHT	100037277|F|0--16:C>G	TGCAGATAGATAGATACAAGTTGTCTGATAACAATCAGATCTAAGTACCTGCCAGAATGTTTTCTAAGA	chr2R	802020759			0.040531029	0.032391151
PHT	3364843|F|0--50:T>C	TGCAGGAGGCAGAGCGAGCGGCCGTCTGGAGCCATGGCTGCGTGGGCGCTTGAGCTGCAACCCTGTCGC	chr2R	843492536	SECCE2Rv1G0125820.1	Ribosomal RNA large subunit methyltransferase E			0.036483839	0.086697994
PHT	3600840|F|0--27:G>C	TGCAGGCCATGGCGCCACGCGCGCGAAGATGAAGAAGACCTCCTTCCATGGCTCCTCGCGCCGTCCGAG	chr2R	843660938					0.041397392	0.054668999
PHT	5209446|F|0--31:A>T	TGCAGATCCTTGAGATGCGAGTTCTTCTCCAAGTCATCTAGTAGAATCCATAAATCAAACCATAGTGCC	chr2R	843931672					0.04880427	0.114595475
PHT	3342597|F|0--25:A>G	TGCAGCAACAACACCACCATCCTGCAACTCGCTCGTCTCCTTGCAGAGAAGTACCCACAATACAGCGTG	chr2R	844463882	SECCE2Rv1G0126050.1	Anthocyanidin reductase			0.034066438	0.152462968
PHT	3361209|F|0--66:C>A	TGCAGCACGAGGAAGGCTACGTTCCATGTAGGCAAGAGTATGGCTCACTTTGTTTTGGCCTATACGCAT	chr2R	844965426					0.041532565	0.073356347
PHT	100040533|F|0--9:A>C	TGCAGTGTAAACGACCAACAAGTTGTATGTCGCCGCCATTCCAAAGATTCCTACCATCCCGCATGCCAT	chr2R	845495966	SECCE2Rv1G0126310.1	Organic cation transporter protein			0.042355758	0.029284208
PHT	100058178|F|0--68:C>G	TGCAGCGGCAGCTCGTGGGGCAAGGAGGGCCGCTACTGGTGGAAGGAGAAGGACATGCAGGAGCTGTCC	chr2R	845783004	SECCE2Rv1G0126340.1	Xyloglucan endotransglucosylase/hydrolase			0.018555666	0.104468829
PHT	100051059|F|0--55:A>C	TGCAGGCCGTAGCGGGTGCGTTGAGCGCTCCTGGCGAGCAGCTCAAGTGCTCAACAGTCACTCCCTTCA	chr2R	847234870					0.015952057	0.194336853
PHT	100071705|F|0--58:A>G	TGCAGCGTGGTCGCGTGTGGTGTTGCGTTGCGTGCTCGGATCGCCACCACTCCTCGCGAGCTGGATCGA	chr2R	849385119			0.027183498	0.03136537	0.02257989	0.037581665
PHT	3744532|F|0--32:A>C	TGCAGCCTCGCCTTGCTCCATTGCCAGCCTTGACGAGCTGCACGTACGAGCAGGAGCACGGACATTCCC	chr2R	851514476					0.045073702	0.073200771
PHT	100069840|F|0--68:T>G	TGCAGGTCCCTCGTCTCCTCCCTCAGCAGCGCGACGAGCCGCGGGAAGTCCATGCGCAGCGCCTCCCCT	chr2R	851516826	SECCE2Rv1G0127180.1	Serine/threonine-protein kinase	0.049198885	0.038619716
PHT	100007409|F|0--65:G>A	TGCAGAGCTGTTCTGTTATGCTAAGTGGAGTCGAGCTATAAGCAGTAATCCTCTAGATGTCATCTGTCT	chr2R	853990132			0.049463308	0.048147924
PHT	100132243|F|0--59:G>C	TGCAGCTCGACCTCCCCGCACTCGACGTTCCTCAGCCTGAGCACCACGTCCTGCTTCACGGTGCCCTCG	chr2R	855923445	SECCE2Rv1G0127750.1	C2 domain-containing protein	0.046878023	0.039111803
PHT	100017747|F|0--20:A>T	TGCAGAGATAAACTTCAATGAGGAGCAATAGTGTGCGAAGGGCTCCCGAATAAGCATGCATATCGCTAG	chr2R	856407710	SECCE2Rv1G0127830.1	CsAtPR5	0.018016013	0.07673017
PHT	3363298|F|0--46:T>G	TGCAGGGCGAAGAAGACAGTGCAGCAGCAGGATAACAGCAGCGGCCTTCGTCCCATGTTTCAGGTCACC	chr2R	859457683	SECCE2Rv1G0128270.1	RING/U-box superfamily protein			0.049057756	0.090165864
PHT	100080862|F|0--7:G>A	TGCAGGTGCACGGCGCCGCGGTAGGGACGAGCGGCCGGCGAGTGGAGGTGGTACGACTGTAGCGCCACC	chr2R	860503296	SECCE2Rv1G0128430.1	Transcription factor			0.037547662	0.085187555
PHT	100004973|F|0--60:G>A	TGCAGCCTCTTGCCGCTGCCCTCTACTGCTTGCTGGTGAGACAGTAGGCCAAGTGCGAATGCAGGAGGG	chr2R	860560768					0.010320669	0.13874392
PHT	100036396|F|0--52:A>G	TGCAGGGCCATAGTTATCGGACTGATGGTAATCGTTTGGTTGATCAAGCAATAGTCCTTCCGACTGATC	chr2R	865564504	SECCE2Rv1G0128860.1	Zinc finger CCCH domain-containing protein 30	0.020711211	0.056380042
PHT	3737535|F|0--14:T>G	TGCAGGTCACCCCCTCCCACTGGCAGCAATGTCCGTCACTCGAGTCCCAGTCCCACCAGTACTCCCAGT	chr2R	867006156	SECCE2Rv1G0129190.1	Leucine-rich receptor-like kinase family protein, putative			0.044091456	0.142409923
PHT	3347772|F|0--19:A>G	TGCAGCCACTTCGGGTCCAACGTCTCGGCATCCTCCAGGTTCGGGATCTCGAAGACCGCCTGCACGTCC	chr2R	868091956	SECCE2Rv1G0129400.1	Beta-fructofuranosidase, insoluble protein			0.045332813	0.061008549
PHT	3746074|F|0--9:C>T	TGCAGATTACGGTCGCGCGAGTCGATGCCGACGACCGTCGGCCCCCTCTTGTACACGGCTTCCTGCAAA	chr2R	868263128	SECCE2Rv1G0129440.1	Cysteine protease			0.049057756	0.056722326
PHT	100038774|F|0--13:C>G	TGCAGAATCATGTCTGTTCTATTATCCTGACTGGTATTTGTATCCTTGAGTACAGAATGAGAGTTGATT	chr2R	868635782					0.043759819	0.075307992
PHT	100078619|F|0--53:T>A	TGCAGGTCCGAGACGGTGAACGTGTCCTCCTGCCTCGTGTAACCACGAAGGGTTATTTACTGCTGGACT	chr2R	873517583					0.049057756	0.039358819
PHT	100107336|F|0--17:C>T	TGCAGCTATTAGTTCTACATGCTATCAGGATGTGTTCTGGGCTGCGAGGTTGTGGATTTGATTCCTCTT	chr2R	876980031					0.044955315	0.083518658
PHT	100039239|F|0--62:T>C	TGCAGCACCACAAGGAAGCAAAAGCACATTAGGAATTCTTGATTCCTCTCTTACCACCTCTCTTGACAC	chr2R	877963677					0.038136378	0.033308608
PHT	100067890|F|0--24:G>A	TGCAGCCGCGAGGGCGAACTCGCCGCGAAGCTCTCGTGCGGGGAGGCTCACGAAACACGGCCAGAGGCA	chr2R	888722660					0.049057756	0.025809122
PHT	100062517|F|0--15:T>A	TGCAGATCGAGCTTCTGTTCGATTCATTCAGATGTTTCAGGCTTCAATCCAAGCACGGAAGGAAGAGGT	chr2R	888756624			0.005777256	0.111748197
PHT	100089433|F|0--14:A>G	TGCAGAGCTCCGACACGCCCAACGGCCCGCTCAAGCTCTCCCTCCAGCTCGTCAGCGCCACCGTCGCCG	chr2R	888769304	SECCE2Rv1G0132250.1	Lipoxygenase	0.046878023	0.026347468
PHT	100065199|F|0--7:A>G	TGCAGCAAACGCTGGCCGAGTCCCTCACGGACCCCTTCGTCGCCCCCGACGCCTACATGGTCGGCGCCG	chr2R	889120216	SECCE2Rv1G0132320.1	transcription factor-like protein	0.016976318	0.067116909
PHT	100029409|F|0--67:G>A	TGCAGCTGGCCGTGTACCTCTGCGCCGCCATGTCGCTCATGCTCTTCGCCGAGCGCCTCTACATGGGGC	chr2R	894709022	SECCE2Rv1G0132950.1	Cellulose synthase-like protein			0.049237072	0.026604289
PHT	100056502|F|0--62:C>T	TGCAGATACATATTTTACAGGCGGCGACTCAGGGTTTAGATCTTTTACTCATTATCTTGACTCGAGAAG	chr2R	894994267					0.042355758	0.065947256
PHT	100014313|F|0--61:C>G	TGCAGAATGTCCGCACAAAACTTAACCAAGTTGCTTCTGTAAGTCCAAAAGCTTAGATTTCCTGCTCTT	chr2R	896548207			0.023511976	0.045429864	0.047710736	0.057228453
PHT	100054977|F|0--52:T>G	TGCAGAAGTTCTTCCAGGCGCAGAGCAAGGTCTGGGCCATGACCTTCATCTCTGGCGCGGGGCTCGCCC	chr2R	897947159	SECCE2Rv1G0133620.1	Protein DETOXIFICATION	0.022625156	0.080461456
PHT	5226219|F|0--41:G>C	TGCAGGTGCCTGGATGGGTTCCAGCCGGCACACGGCTTCGGGGTCGGCCCCTCCAGAGGATGCGTGAGA	chr2R	898084217	SECCE2Rv1G0133700.1	Serine/threonine-protein kinase			0.032473752	0.106153793
PHT	5040701|F|0--45:C>G	TGCAGGACGGCCCCTTTGACCTCGCAGTAGCCGAACGGCCCGCACCCGCCGTAGACGAGGCACCCCTTG	chr2R	898460464	SECCE2Rv1G0133780.1	Serine/threonine-protein kinase			0.043759819	0.050334051
PHT	100031064|F|0--23:A>C	TGCAGAGCTGGACGATGTCGTCGACGGTGCCGGCCTCGTCCTCCGCTTCAGAGAATGGCATTCCAAGGA	chr2R	898660554	SECCE2Rv1G0133840.1	Sulfotransferase	0.022625156	0.034677037	0.042233378	0.027912305
PHT	100067652|F|0--35:A>G	TGCAGCAGTATCAGTACCAGCAGATGGGCGGCCAGACAGGTGCCAGGGGGGAGCCGCTCCAGTTCACCA	chr2R	898747306	SECCE2Rv1G0133890.1	basic helix-loop-helix (bHLH) DNA-binding superfamily protein	0.021462314	0.069309109	0.034066438	0.088859788
PHT	100068444|F|0--10:T>C	TGCAGAGCGCTGTCGCGAGACAGCCCATCGGCGTCGCCATCGAGGTCCCCAGCAGCATGCAGTTCTACA	chr2R	903007327	SECCE2Rv1G0134750.1	Cysteine protease	0.038834093	0.023936226
PHT	100126693|F|0--28:A>G	TGCAGGGCATGCGCCGGCGGCTGGCGCGACTGTTCGCGCGGCTGCACGCCGTCTTTGACGCCGAGGTGG	chr2R	905726600	SECCE2Rv1G0135180.1	Cytochrome P450 family protein, expressed			0.049057756	0.044481845
PHT	100159630|F|0--32:T>C	TGCAGTCAGATCCAACAGCTTCGTCATAGATCTAGAGCTGTGGCATGAATAATTTGTCGAAAATGTACC	chr2R	924510749					0.022963881	0.115291496
PHT	3889882|F|0--68:G>C	TGCAGGCAGGGCACGTCCAACTTTGTTGCCATTTTACACTACTTGGCCACCGACGCATCCGATCACTTG	chr2R	925250525					0.044091456	0.055219545
PHT	100108096|F|0--51:C>A	TGCAGGAGACGACGAGGGAGGAGGAGGAGCTCTTGGGGTGGAAGACGGGGACGGAGCCGGTGGCGGAGC	chr2R	926590761	SECCE2Rv1G0139350.1	Eukaryotic aspartyl protease family protein			0.034066438	0.200223662
PHT	3744328|F|0--8:T>G	TGCAGCGTTGTGAGCCGGTGCGTGGACCCCGACCCGTCGAAGCGGCCGTCGATGCAGATCATCGCGGGG	chr2R	929121752	SECCE2Rv1G0139800.1	Receptor kinase, putative			0.039253365	0.068029452
PHT	100122695|F|0--64:C>G	TGCAGGCGGTCGAGCTCCAGCAGCGCGGCGGCAGGTGGGCGCCGATGCAGCAGTCATGGGGCGCCGTGT	chr2R	929144196	SECCE2Rv1G0139850.1	Expansin protein			0.040033647	0.077548576
PHT	100110375|F|0--36:G>A	TGCAGTTGAGCCTTGTTGCTTGAGAAGCTTGACAAAGTTAGAGCTGACTTATGTGCATATCACGGGGGA	chr2R	929667663					0.048691274	0.048567184
PHT	100030496|F|0--28:T>C	TGCAGGTTCCCCAAACTGCTACACCTCTTCCTTTTGTTCAGTCCCGAGGACGTTTGTTCTTAATTTCTT	chr2R	930353879					0.044960521	0.038764205
PHT	100037384|F|0--59:A>G	TGCAGATAACATACGTGGTCAGGATAGTTTGGGTCAGCAAACCCAAGAGGCTGCCGACAATACACTGTT	chr2R	931265219			0.030037975	0.043206475
PHT	100126258|F|0--35:G>T	TGCAGGATGAGCCAGAGCGCGTAGAAGAAGCAGCTGCCGGTGCAGAGCAGGGAGCCCATGGCGCGGTTG	chr2R	932353456	SECCE2Rv1G0140680.1	WAT1-related protein			0.049237072	0.050024773
PHT	100057510|F|0--38:C>T	TGCAGCGCTCCTGGATCGTCCTCATCGCCGCTGCGTTCCTCATGGTGCCCTTCTACGTCCTGGCCGAGC	chr2R	933222874	SECCE2Rv1G0140870.1	Protein DETOXIFICATION			0.043759819	0.038761788
PHT	100024853|F|0--41:T>C	TGCAGCCGCAGCATGCTGCTCGAAGGCGGCCATGCTCACTCTCCCCCTGAAACCTTCTGAATGATGAGT	chr2R	934839684	SECCE2Rv1G0141310.1	Kinase family protein	0.018845891	0.044494107
PHT	3587083|F|0--11:T>C	TGCAGCAGAAATGCACGCACTCATCAGTGATGAGTTGTGTTTCATGAGCTTTTGCGATTCCTTACCTTT	chr2R	935628752					0.034066438	0.08157326
PHT	100104424|F|0--6:G>A	TGCAGAGCCTCGCGGCTGCGGCGGTCCGGCCGGCGATGACGGCGCCTCCCAACAGAGCAGCCTGGGAGC	chr2R	936051052	SECCE2Rv1G0141620.1	2-oxoglutarate (2OG) and Fe(II)-dependent oxygenase-like protein			0.04961185	0.068283785
PHT	100032658|F|0--12:T>A	TGCAGATGCTTCTGGCAGTTGGCCAGGCACCCTTGTTGCTTGCAAAAGTGCTTCGGAAGGACGGCATCA	chr2R	936939125	SECCE2Rv1G0141830.1	coiled-coil protein, putative (DUF572)	0.033510337	0.036103592
PHT	100148558|F|0--9:T>G	TGCAGCCATTGCCTAGGCAGTTGTACCATGCGCTAGGGCGGTTGAACCGCTTCTTCCATGAGCGGTACT	chr2R	937014163					0.049201123	0.03980054
PHT	100079103|F|0--17:C>A	TGCAGGTGGGGTCAGTGCATTCGTCGAACGAGTGACTTCTGGCCGTCTTAGATGATCTTATTTTTGGCT	chr2R	937124544			0.046878023	0.026520733
PHT	100171023|F|0--32:C>T	TGCAGGAACGACGAGTAGATGGCGCAGAACGGCTTCATACCCTCGGCGGCGAGCCCCGCCGCGAAAGTC	chr2R	938385429	SECCE2Rv1G0142080.1	1-deoxy-D-xylulose 5-phosphate synthase			0.037848352	0.135596604
PHT	100034111|F|0--50:C>G	TGCAGCACGGAGATGGGGTTGGTGTAGTGCATCTTGGGCAGCAGCGGCCGCCCGTACTGCCCCAGCATG	chr2R	941181131	SECCE2Rv1G0142520.1	C2 calcium/lipid-binding and GRAM domain protein			0.049057756	0.022222912
PHT	100026753|F|0--49:T>A	TGCAGCAAGTGGTATTAAGTATGAACACACAGGTCTTTCCTTCTTGGAATCCAAGAGTGTGAGCTGCAT	chr2R	943639902			0.032345596	0.018816663	0.032982999	0.026345571
PHT	100038909|F|0--10:G>C	TGCAGAATCGGTTGTCCACACGACAAGTGGACGGTAAAACAAATGGATGGATGTTGGTTAATGAGCATT	chr2R	943817996	SECCE2Rv1G0143060.1	F-box protein			0.047573937	0.035079296
PHT	100107908|F|0--52:G>A	TGCAGCTTTGTGTCGGCATTCTTTAATCAATAAGAAGCGGCTTTGCTCCGCTGGCGGTTTCCAACTTGT	chr2R	944318965					0.02172327	0.155937598
PHT	100067184|F|0--40:C>G	TGCAGCATGGATCAAACATACATCAAAGAGCGGAGCGGAGCGGATCAATCAACAGAGGGAGGGTTAGGG	chr3R	108938			0.043893468	0.031154958
PHT	100007433|F|0--55:G>C	TGCAGTACCAGCATCTCGGCGAAGGCTAATTAGTAACTAAACTTAATCAGTACATGGCCAAGTATAAGT	chr3R	1042958			0.03841834	0.063512185
PHT	100007443|F|0--49:T>A	TGCAGCATACTAAGTCTCAGTTTCCGAAATAAATACATTCAGAGTTCGTTGTGAAACAAATCTCTAGAT	chr3R	3241718			0.03789411	0.035015054
PHT	3737855|F|0--37:G>A	TGCAGGCACCCGTGCTAAAGAAGTACCCCGCGAGGCTGTCGGTCACCTCCTACACCTGCTTCTTTGGTG	chr3R	5417271	SECCE3Rv1G0144790.1	WAT1-related protein			0.037166858	0.095270155
PHT	4490454|F|0--26:A>G	TGCAGAACCATTATTCTTACACATTCAAGCACAGATTCGTGGCACGGTGGCCACATATTCATGGTAAAC	chr3R	11491528					0.036408367	0.171408699
PHT	3597316|F|0--13:T>C	TGCAGCAGCAAATTGAAACGAAACGAATTCGTCAAGTCAAGGTTTGAGGCAGATTGGAGGCTTGAGGGG	chr3R	12045046					0.046398949	0.078816233
PHT	100183153|F|0--49:C>G	TGCAGCATGTCGTCCACGGGGCGGCCTGCTTCTCTGCGCGACCTGACCACTTGGGAGAACATCTCGCCG	chr3R	12417273	SECCE3Rv1G0146810.1	Obtusifoliol 14-alpha demethylase			0.046398949	0.064748059
PHT	100089680|F|0--31:T>C	TGCAGTTACGATTGGGACTAGTCCCTGGTAATCGTCGCCGCCTGGAGACGGCCGCACCGTGCGCCACCG	chr3R	15217227			0.047113574	0.069477667
PHT	100025401|F|0--13:G>A	TGCAGCACAAATCGACATTGGCGAGCGATGGATCAACACGTACGCTGCGAACCGGGAACAAACTAAAGG	chr3R	26321723			0.023565312	0.048881335
PHT	100012137|F|0--41:C>T	TGCAGCCCCTTGTGCGTGGCGATGGCCTGCGAGAAGCCATACAAGCTGTGGGCATTGTACTCGAGGATG	chr3R	27642466	SECCE3Rv1G0149680.1	Alpha-glucosidase	0.040531029	0.021424537
PHT	100038857|F|0--59:G>A	TGCAGTAGTGGCGAAATGTTCAGAAGAGAATAAATGGATTCATCATGCTCAAAAGTCCCGACGTCAAAA	chr3R	29780484	SECCE3Rv1G0149940.1	ARM repeat superfamily protein	0.001410396	0.087789454
PHT	100051405|F|0--36:T>C	TGCAGGGGCTATGTCTTGCTTACTGCGAAACGTACCTACATTTCACCGCTGGTGGTATGATAACGAGCA	chr3R	29810089			0.034205684	0.029946849	0.02230195	0.127389356
PHT	4497148|F|0--32:T>C	TGCAGCAGGAAACAGGCAGCGACGGCGGGCCGTAGAGCGGACTTGCGGTGGCCATCCGCCATCCATCGG	chr3R	32078789					0.049365921	0.075655881
PHT	3351697|F|0--65:T>C	TGCAGCGCGGCCACCTTAGCTCTTACATCGGCGCCTTTGCCTTGGCCAGCCATCACTTCCCTCACTGCC	chr3R	32953220	SECCE3Rv1G0150570.1	Glycosyltransferase			0.04476766	0.085314759
PHT	3907825|F|0--51:C>T	TGCAGCCATCAGCTTGGGCTTTGCAATCGTCAATATCTCCTACGGGGACGACAGCTTGCATGTCGTTGA	chr3R	34945846					0.048048428	0.068898216
PHT	3591091|F|0--16:G>A	TGCAGCCGTAGTTGTCGACGCGGAAGGCGACGGCGCCGTCGGGGCCGTACACCGCGCAGCCGTTGCCGT	chr3R	37801720	SECCE3Rv1G0210570.1	LURP-one-like protein			0.042233378	0.051915057
PHT	5213603|F|0--39:A>G	TGCAGAGAGAAGTGGCGAGCTGCGACCGACGGTCATAGCAACGGCCGTGGAGGGGCGTGGCATGTTAGC	chr3R	38894004					0.036408367	0.075368635
PHT	100138138|F|0--58:G>A	TGCAGCCGTGCATTGCCAAACCCAAAACAGTACTGCCCAAGGCATCTTGGCCGGTTTGGCCCGCCTCCG	chr3R	41379739					0.049057756	0.046005315
PHT	3585847|F|0--7:A>C	TGCAGTAAATTGAGGAAGACGATCAGATCAGTACACACGTAGGTAACGATTGAGTCTAGCGAACATACC	chr3R	44859512					0.046549417	0.045730922
PHT	100022096|F|0--13:C>A	TGCAGCTCTAGGACCTGTCTATGGTCCAAAGAGAAAAAATAAATGTTATTTCAGTACGTGTCTCGCAGG	chr3R	45202035					0.040033647	0.061092756
PHT	100054039|F|0--68:C>T	TGCAGGAAGAAGATGAGCACCGCCCAGTAGAACGCCACGTCGCTGAAGAGCGACGAGAGCCCGAGCAAC	chr3R	47113548	SECCE3Rv1G0152370.1	Ethylene-dependent gravitropism-deficient and yellow-green-like 2 isoform 2			0.049937811	0.044572499
PHT	3353386|F|0--5:T>C	TGCAGTCCGCTCCGCTCCAGATTTTCAACTCCGATGAGTTCGAGAAAGCGCCGCTCTGCCACATCCGAG	chr3R	47462380					0.031993668	0.154595414
PHT	3887994|F|0--23:T>C	TGCAGTTCATAATCTACTCCGCGTGGTCGGCCTGTCACGAAAAAAAGAGCTGTCCTAGCTGGCTGTGTT	chr3R	48138337					0.042355758	0.057495148
PHT	100044515|F|0--27:T>C	TGCAGCCTGAAGAATTGGTGAGCGAAGTAGCCTGCGTCGCCGTATGAATCAGATCTTTTCTTAGGGAAG	chr3R	49673649					0.042207921	0.032040037
PHT	5041314|F|0--23:T>A	TGCAGCTTCTCTTCAGTGAGTCATCGATCGATCTCAGACCGTTCTTGGTCGATCGATCGCCGCCGTCGA	chr3R	50116996					0.03003634	0.096866806
PHT	3590338|F|0--5:C>T	TGCAGCCCCTCCTATAAAACCCATCCAATCCCCACCCGTCTGAAGAACCCTCCGCCACTTCCCCGTGTT	chr3R	50313422					0.039375083	0.069614977
PHT	100168884|F|0--11:G>A	TGCAGTGGGCGGCGCGGTCGGTCGCTGCGGGGCGCTATAGCGGCGTTTCGGAGGTGCTAGAGGCGGCCT	chr3R	52877881	SECCE3Rv1G0153230.1	Invertase/pectin methylesterase inhibitor family protein			0.041532565	0.057564847
PHT	3732326|F|0--34:C>T	TGCAGGCACGACTGCATGACCTTCCTGACCTTGACGTCTTTGGCATGGGCGAGCGCAGACTTGATGCTG	chr3R	52907659	SECCE3Rv1G0153240.1	Plant invertase/pectin methylesterase inhibitor			0.0200629	0.130920942
PHT	3354396|F|0--57:A>C	TGCAGATGGCCTCTGTTTTGTACTCGGAGCCCCGCCACCGCTCAGATCTATAAAAGGAAAGCTCAACCA	chr3R	52984791					0.041286533	0.212485024
PHT	3909776|F|0--25:A>T	TGCAGCCATATATGATCCATCCGCCAGCTTTGTGTCGCATGCTGCAACGAGCGCTCGCCTCGAAAGGCC	chr3R	52995136					0.049048359	0.043739908
PHT	100079133|F|0--8:T>C	TGCAGCTTTATGGCCAAGTACGTCAGCAACACCCTCCTCTGGCACTTCGTTCCTCCCCTCGGCTTCCCT	chr3R	55791592					0.045765318	0.049544767
PHT	3597235|F|0--38:A>C	TGCAGCTTCATGGCCAAGTACGTCAGCAACACCCTCCTATGGCACTTCGTTCCTCCCCTCGGCTTCCCT	chr3R	55791592					0.032982999	0.099860712
PHT	100021899|F|0--43:A>G	TGCAGGTGTACATGTAGTACATAGTGTCACATCCTGCTTTTCAAATAACCAATTGTACGCACTAGGTTT	chr3R	63560196			0.041671813	0.063301803
PHT	100079886|F|0--54:G>C	TGCAGCCGAGAGGATCCAATCTCATGACCTGGCGAAAGAGTGTACCCAACTGACGAGTCGAGCATGAGG	chr3R	64813957			0.04135085	0.036972549
PHT	100140226|F|0--31:C>G	TGCAGTCCCTGGTCCTCGTCGACAACAACCTCACCGGCGCCGTGCCGACGGAGCTCGGCGGGCTGGCGA	chr3R	65381547	SECCE3Rv1G0155460.1	Leucine-rich repeat receptor-like protein kinase family protein, putative			0.045414858	0.061276864
PHT	3351107|F|0--40:A>C	TGCAGGGGCAGCCGCTCCTCGCCACCAGTACGTATCAGCTAGACCGATCGCCATGGCCAACTGTTCTTG	chr3R	67073179					0.026923474	0.099123674
PHT	3593929|F|0--29:C>G	TGCAGGGACGGCGAGGGAGCCGTGGTGGACCTCCCCTGCCATGACCGCACCCTACTGCGCGCACGCGCC	chr3R	68264065	SECCE3Rv1G0155700.1	Hydroxycinnamoyl-CoA shikimate/quinate hydroxycinnamoyltransferase			0.041397392	0.054365873
PHT	100048572|F|0--31:T>C	TGCAGGCGCAGGCTGGACCTAGTGTGCATGATGAACCCGTAGAGCTCGCCCATGTCCAACGTCTCCCCA	chr3R	69031472	SECCE3Rv1G0155740.1	Cytochrome P450	0.022903166	0.023966722
PHT	100042097|F|0--68:A>G	TGCAGCTTCGCGCCGCAGAAGCGATTCCCTGCGTCAAGGATCGTGCGCGCTGACAGGTTGGACCTTAGA	chr3R	73485642			0.019247123	0.030724283	0.036286096	0.028857993
PHT	100019039|F|0--53:T>C	TGCAGTCGGCTGTTTGGAAATATAGCTTGTCCCTGGCAAGGTCGTAGAGCAGGTGCATGTTCTGCAACT	chr3R	73549698	SECCE3Rv1G0156520.1	Aspartic proteinase nepenthesin-1			0.029099644	0.045530408
PHT	100021140|F|0--13:T>C	TGCAGGTACGCACTGTAGCAGCACGCCCCAATCAGGTGTTCCATCTGCTCCCTCACTCGGTCCCAGATT	chr3R	74373691			0.006141247	0.066417211	0.036537255	0.080126263
PHT	3736573|F|0--66:T>C	TGCAGTAGAGACTTTTTCTTCAAGCGTTTTCTCACATTTTCTTCGGCGCCTAAGACAAACTTTCCTTTT	chr3R	78556322					0.036286096	0.100899006
PHT	3743095|F|0--62:G>A	TGCAGCACATGGCTCGCGCGCTCAGCCTGGTTTCTTGAGCTAGCTAGATCTTGGTGGACTGGGACCGAG	chr3R	81005960					0.041943556	0.119013774
PHT	4494774|F|0--53:G>C	TGCAGCGAGTGCGGCTGCTACGACGCATTCTGCGACCGCTGCTGCCCCTGCGTGTCCCACGACGCGCGC	chr3R	81005963	SECCE3Rv1G0157360.1	Harpin inducing protein			0.049966193	0.083748903
PHT	3739232|F|0--38:C>G	TGCAGCCGCTGCACTTGAGCGTGATGGACGGCCCCTGGCTCGTGTTCTGGCACCTGTAGGTGAAGAGCG	chr3R	85067264	SECCE3Rv1G0158010.1	transmembrane protein			0.04485499	0.065436676
PHT	3362878|F|0--14:T>C	TGCAGCAGAGTAATTGTCATGTGTTTTTGAGGATTTGTCATGAACGCATGATGCAACATGGAGAATTAC	chr3R	85437860					0.044377285	0.073883733
PHT	100009202|F|0--29:G>T	TGCAGCCTCTACGGGGACGCACTGGTGTCGCCCTCGCTGGAGCGCCTCGCCATCGTCCACTGTCACACC	chr3R	85798381	SECCE3Rv1G0158150.1	F-box family protein			0.045332813	0.017788955
PHT	3593858|F|0--33:G>C	TGCAGGGGATCGCGACCTGGCGATGCTGCTCCTGTGCAAGGGCGCCGACGTGGGCGCGGCGAACCCCCG	chr3R	89808973	SECCE3Rv1G0158640.1	Ankyrin repeat protein-like			0.03163267	0.126117262
PHT	4489894|F|0--10:A>G	TGCAGCGCCAAGAGGTTCCCGAGCGACGCCGGGATGTGGCCGGTGATGCCGTTCATGGACAGGTCGATG	chr3R	91276032	SECCE3Rv1G0158840.1	Receptor protein kinase, putative			0.047772188	0.070246496
PHT	100033068|F|0--60:T>C	TGCAGTGCACGCACTGATCTGATCTCATGGAGTCATGGGTCGAAGACGGCGTCGCCGCACTTGCACTTC	chr3R	109525771					0.041397392	0.079779459
PHT	100030569|F|0--16:A>G	TGCAGTTCGGCACGGCATTCGAGCAGCTTGTCAATGCTCACCAGGACTCAAAAACAACGCTGGACTCCA	chr3R	150961298	SECCE3Rv1G0163720.1	ABC transporter-like family-protein			0.032086606	0.070507395
PHT	100009959|F|0--68:A>G	TGCAGCTCCATATCCAGGAGCATTTACATCTCCCTTGAGCTCCTCCACCAAATACTTGCAAATCTCCAA	chr3R	156358593	SECCE3Rv1G0164040.1	Ankyrin repeat protein-like			0.047147609	0.061251191
PHT	100014449|F|0--17:T>C	TGCAGCAACTTTTCAAGTTTCGATCCACTAATTTCGCTCTAAAGTACGAAAACTCGGCCCACTCTTGGT	chr3R	163084472					0.023378636	0.101943378
PHT	100050655|F|0--24:G>A	TGCAGGGACGTACACGGTGGGCCCGCCGCCGTCTCTGCAAGCCGAGTCCCATGTCTGCTCGAACGCCTG	chr3R	163196196	SECCE3Rv1G0164440.1	Pectin lyase-like superfamily protein			0.038889537	0.055843422
PHT	100054996|F|0--14:C>T	TGCAGTCACGCGGGCGCTTTACCGACCACGGTAAATTCAGACACGAGGCAATGTACACATGCTTTAGCA	chr3R	166616501					0.018555666	0.139065688
PHT	100076755|F|0--52:T>C	TGCAGGTTGACCACCGCAGCGCCACGCCCTGCCTTGGGTCTTGAGGCCTCGGTTAGCTCAGCGCCTCAG	chr3R	167641494					0.049057756	0.033954286
PHT	100065850|F|0--52:C>G	TGCAGAGCGAAGGCTTGAGCTTCTCGAACCAGTCGAGCTGGACGCTGAGCGACAGGTTGGTCCAGAGCT	chr3R	174822825	SECCE3Rv1G0165480.1	GDSL esterase/lipase			0.0200629	0.116989496
PHT	100032949|F|0--42:G>C	TGCAGCTCCGTCGCCTTCTCCGCCTGTTGTGCCATTGCTCGTGACAAGTCTTTGAAGTCTGTCTCCGCT	chr3R	180009880			0.026457728	0.049852607
PHT	100041285|F|0--43:C>A	TGCAGTCCGTCGTGAAGGAGACGCTCCGCCTCCGCATGGCCATCCCGCTCCTGGTGCCGCACATGAACC	chr3R	184079539	SECCE3Rv1G0166200.1	Cytochrome P450 family cinnamate 4-hydroxylase	0.029457449	0.019869124
PHT	100080907|F|0--55:G>A	TGCAGGTAGGGGAGGCGCTCCAGGTCCGGCTCCGTCACCGCCGTGCCAGGGCCCAGAACGGCGACGATC	chr3R	184079542	SECCE3Rv1G0166200.1	Cytochrome P450 family cinnamate 4-hydroxylase			0.039375083	0.098098841
PHT	100030840|F|0--58:A>T	TGCAGGCTATAGCAGTATAAATAGACAGCCATCTCCCGCTAGTTTCATGCACCGATCAATCTTCTCGGA	chr3R	184294203					0.044656294	0.051316364
PHT	100049717|F|0--27:G>A	TGCAGAGACAGACAGCACAGCCGAGCCGAGCCAAGCCAGGAGCAGCCAGCCACAAAGAGGGGACGGGAA	chr3R	187171283			0.029457449	0.037293816
PHT	100021085|F|0--26:A>G	TGCAGATTAATGTTCTGTTATTGACTACCTTTTGTACTCCCATGTCCTCCTTTTCATCGCCAATTAATG	chr3R	207279960					0.039930166	0.020892338
PHT	100030863|F|0--25:T>C	TGCAGATTATCTTGAGATGAAAACGTATCACTGCCTTTGTCTTCAAAGCGGCCTGCATGTCCACTCCGC	chr3R	209040028					0.02257989	0.148823584
PHT	100024617|F|0--7:G>T	TGCAGTAGCAGGACGCCGCTGTTGTCCTCATGCTGCTACTCGACCTCAACATCGGAACATCTCCGTCCT	chr3R	213997542					0.042355758	0.021454466
PHT	3350873|F|0--40:T>G	TGCAGTGTCCGAGAGCTCCACTACGATCGCCCACATCAACTACGCCGAGCCGTTCGAGCTGAGGAGCCC	chr3R	235360023					0.042233378	0.065248728
PHT	100059634|F|0--55:A>T	TGCAGACTTGGATGTGCGGCCAGATTTTCATTGTCGTTCGGGAATCGTCTGAATTATGTCGTTTGTATA	chr3R	254853177					0.046398949	0.017943299
PHT	100197196|F|0--12:T>C	TGCAGACACTTATTCTTTTCTTCAGCCTTATCCTCACCCAAAGGCTTAAATAGTCTTGTTACCCGAGAT	chr3R	284418662					0.036408367	0.095663855
PHT	100026582|F|0--22:C>G	TGCAGCTCTGTTTGACCAAGAACTAGCGCAATATGTGTTGGATCGATCTTGAGCAACCGCTTGCCCCCT	chr3R	487023529					0.032115554	0.054031086
PHT	100018250|F|0--48:T>C	TGCAGCGACTGCAAGCTTTTGCCCTCCTTTCTTATTTCTTCTTTCTTTTCGTGATTTCGTTGCCGAGAT	chr3R	623300273			0.046239681	0.040793155
PHT	100042691|F|0--14:G>A	TGCAGCGACTCGTCGGGCAGCTTCCCGCTCTCCGTGAACATGCTGCCGATCTGGCATTGCTGGATAATC	chr3R	657455511	SECCE3Rv1G0183950.1	Guanine nucleotide exchange family protein			0.03003634	0.070960271
PHT	100030449|F|0--41:C>G	TGCAGTACGGAGTATTCTCGGGGACATTGCACATTATTGGGCAGCTTCCCTTCCCTGAAGAGATTGCAG	chr3R	665258918					0.024526689	0.152895273
PHT	100058398|F|0--49:G>T	TGCAGAAAGCGTCCGCCGCGAATGCCGCGCCTCTTTGTCGCCCCGCAGCGAGGGACCACGCGCCAGCGT	chr3R	666038149			0.037666513	0.01688625
PHT	100059085|F|0--64:G>A	TGCAGGCGCTGGTGCGCGGCCGCCGTGTGCGCAAGCAGCTGGCCGTCACGGTCAAGTGCATGCAGGCGC	chr3R	666038930	SECCE3Rv1G0184770.1	Protein IQ-DOMAIN 1	0.035415997	0.017472984
PHT	100073708|F|0--26:A>G	TGCAGCCTCCAGGACGTGAACGGCCTAGACTGCCCGCTCATGGTCTGGGAGGAGGAGCTGCTGCCCGCT	chr3R	666250575	SECCE3Rv1G0184810.1	3'-N-debenzoyl-2'-deoxytaxol N-benzoyltransferase	0.031599473	0.049253573
PHT	3746407|F|0--33:G>A	TGCAGGAGACTCCTTCAAAGAAAAGTATAGAAAGGTCATACGTACCGCTACCGCACTGATCCGCCGTGG	chr3R	679992681	SECCE3Rv1G0186050.1	Receptor-like kinase			0.049048359	0.064300052
PHT	5223946|F|0--51:G>C	TGCAGGAAGCGGCGGGGCGGGCGTCGGCTGTGGCGAAGGGGAGCAGGACGAGGAGGAGGAGGAGCAGAT	chr3R	680016351	SECCE3Rv1G0186070.1	Protein kinase family protein			0.039253365	0.132242313
PHT	100039695|F|0--17:A>G	TGCAGAGCCCTCTCTTAAAAGCCATTTCTGCCAGCCAGTTGAGAAGTAATTAGGCATGTGGTGTAAGCC	chr3R	684502026			0.040676642	0.048766364
PHT	3908270|F|0--34:A>T	TGCAGCGACGCGGATTAGCGATTTGGCCGGACAAAAGGGATCTGCTGCAAAATGTAAGTAACAAATCGG	chr3R	686915074					0.03566871	0.095679581
PHT	100066358|F|0--28:A>T	TGCAGGTATGTAGTATGCCCCAACCTGAATTTTTCCTCCCTTTCCTTTTTCCTTCTATTTTTCTTTCCA	chr3R	694449307			0.020996389	0.048975997	0.039749357	0.092302179
PHT	100009127|F|0--41:G>C	TGCAGCACCTGTTGGAATATATAGCATGAAAAATAGATTAGGAGCCATTTCGACACTCCTGGTACCGCC	chr3R	694461648			0.038217359	0.039671581
PHT	100027150|F|0--25:C>T	TGCAGTCACATGCATATTGATCGATCGAGCTAAAAGGACCCTTCATATGACAAGCACCTTTACTTTACA	chr3R	696887641			0.001410396	0.061109659
PHT	100036494|F|0--64:C>A	TGCAGGCCGATTCCCGCGCATTCAAGAGCGCCTCCTACCGAAAATCCATGGAACAGGTCAGGCCCCGAA	chr3R	702748071					0.039736621	0.088261459
PHT	100006953|F|0--48:A>G	TGCAGTAGGCAGCAGCCGCAACTAAGCAACGAGCAGCAGCATCACATCATCGAAGCAACATGGACGAGC	chr3R	707916056			0.03138245	0.025256692
PHT	100010900|F|0--60:C>T	TGCAGACAACATACCTACCCATTTCAATTTGTTGATTGTTTAGCACTTCTCATAATCCTTCGTATTTAT	chr3R	708202679			0.04768815	0.015708416
PHT	3595637|F|0--13:C>T	TGCAGATAAATGGCACTAGATTAGTGCAAGGCACAAAGAATCAATGCTCAAGTTTCTGATGTATTTTTA	chr3R	710244885					0.049572303	0.042851245
PHT	100053318|F|0--50:G>A	TGCAGGAGATAAGTTTTCTTTTTCGAAAAAGCAGGAGATAAGTTTGCGCTGGCGGCGGACAGGTACTGC	chr3R	712147663			0.036502039	0.090901234
PHT	100051290|F|0--37:A>G	TGCAGGCGCCGCCGCAGTTCCCGTGGCCGCCCGTCTCACACAAGCTCATGCCCTTCGAGATCGACCTCC	chr3R	713353897	SECCE3Rv1G0188450.1	epstein-barr nuclear antigen			0.049057756	0.01954775
PHT	100081095|F|0--31:T>G	TGCAGCCGCGAGTAACGCGCCGCCGTGGTAGTTCTGCTCTAGGCTGTTTTTGCTTATTCTGATGGGTCG	chr3R	715364297			0.033791416	0.042954002
PHT	3747147|F|0--25:G>A	TGCAGGTGTCGGACGCGATGGACGTGGAGATGCGCGCGGGGCTCGCCTCCGAGGACGGGAGCAAGCTCA	chr3R	719445389	SECCE3Rv1G0188870.1	Phosphotransferase			0.042355758	0.051392045
PHT	100022308|F|0--9:A>G	TGCAGCTGCAACGGCCACGCCCATGTCTGCCAAGATTCAGCAGCAAGATGGTCAGCCAAAGATACAGTT	chr3R	721956338			0.009161921	0.073995308
PHT	100012559|F|0--42:G>A	TGCAGCTCCGCCAAGTCTCCATTGCAGCCTCGTTTGGTCTCCGCATTGAACCGCCACTATTCCAACCAA	chr3R	724369827			0.045346344	0.035166822	0.042233378	0.0364395
PHT	100055626|F|0--63:C>G	TGCAGTATGATGTCCTCCTTCGGGGCGAAGTACTCGGCCACCATCTCGGTCACCTGCATAGTTCGAAAC	chr3R	730944889			0.018002177	0.032113117
PHT	100036225|F|0--15:T>A	TGCAGAAAAGGCAAATGTTCTCTTGGGCTCAGCTCTAACCGATCGAGCTAATTGAACGGCACTCGCAAG	chr3R	731558334					0.041384246	0.063179841
PHT	5208417|F|0--18:C>G	TGCAGATACCATGGCGATCCAAGCTGAATTCAAACCATAAAGACGAAGAGACTGCAAGAAAATTTTGTC	chr3R	734982530					0.037166858	0.084508717
PHT	3364216|F|0--51:T>C	TGCAGACACCACACTAACCGCTGGCACACCATCTCACCATGTTTTTCGTCATGACTTGGCTTTACTAGA	chr3R	736163198					0.041847968	0.087811105
PHT	100002452|F|0--13:C>T	TGCAGTCTGCACTCACCTCAACCTGTCTGTGGGGACAGTGAGCTTGCAGTCCTTGAGATGATGGTACAC	chr3R	738555187			0.001410396	0.070888822
PHT	100093487|F|0--14:G>C	TGCAGCAAGGAGCGGTGCAAATTTAGCGCAAGTGAAGCATCGGCACACTCATATTTGGTGGTTTTGCGC	chr3R	738555761			0.001821923	0.120541118	0.049499684	0.018893722
PHT	100019020|F|0--29:G>A	TGCAGCACTGTGCAATTTACATAGGGAAAGTACGTCAGCTAGTCATGCAAGGATTAATGTTTGGTAGAG	chr3R	742622557			0.023903379	0.061632224
PHT	100033118|F|0--56:C>G	TGCAGTACAGCAGCAGCAGAACGTCCGTCCGTCTGGAAGCGCAGAGATGGCATCTCCAACCGTCCTTAA	chr3R	745420467			0.017203623	0.063477893
PHT	100131146|F|0--16:G>A	TGCAGGACAAGTGTGCGCATGTGACGTCGTCGGTGCATGCGCGCGCCGGCCGGTCGATCTCTTGCCGAA	chr3R	754106801					0.049048359	0.035624462
PHT	100049719|F|0--57:T>C	TGCAGACATCTTCGTGGCCGTGCCTAGGGGGTTGGATGGCGTCCCGCCGTTGCTGGTTCGCACAAGGTT	chr3R	761882749					0.04322127	0.047065719
PHT	100034308|F|0--56:A>G	TGCAGCTTGCGATCCACACTCTCTTCAGGTTTGTCATGGTCTTCCAGAGGTGGCTTAAAGGGAGCTCTA	chr3R	766140704	SECCE3Rv1G0193140.1	CC-NBS-LRR family disease resistance protein			0.033345266	0.095883578
PHT	3362776|F|0--15:G>A	TGCAGATGTCACATTGCTCTTCACGTGGGCAGTAAGTGCAAGCCAACACTCTGCTCTTCACAACTGACA	chr3R	770495898					0.045546449	0.044956222
PHT	100108465|F|0--20:T>G	TGCAGGCCGTCGTCAAGGAGTCGCTCCGGCTGCACCCGCCGACGCCGCTGATGCTCCCGCACAGGGCCA	chr3R	776662884	SECCE3Rv1G0194020.1	Cytochrome P450			0.041171818	0.06789801
PHT	100047403|F|0--48:C>G	TGCAGACCAGTCTACCGCCGAACCCCCAAACCTGAAATGCTTGGCACCCCTCATAGTCTGTCTCTTGTG	chr3R	779129750			0.018543962	0.029785244	0.042355758	0.048015069
PHT	100065609|F|0--37:C>T	TGCAGCAGGATGGTGAGCATGTGCGAACGCCAAGCAGCTCGCGGAAAGACGCCTTTCTCTTGCGCATGT	chr3R	801772691			0.045144301	0.03652028
PHT	100058378|F|0--28:C>A	TGCAGAGTGTGGATCGCGTCGTCTACATCTGGTAAATTCGTCCGAAACACTCGAGGGCTTCTTCTGTCC	chr3R	801822788			0.036026896	0.024289931
PHT	100009632|F|0--16:A>G	TGCAGGTCCATCACCAAGTCCTGATACTCCTGAATCCTAGAGCTTATATGAGACAGATACCTCGGGCTG	chr3R	803624078	SECCE3Rv1G0195910.1	DUF641 family protein	0.041329735	0.016746677
PHT	100089140|F|0--18:T>C	TGCAGCACCCCGGCGTGCTCGCCTCCTCCCTCCACGCTCCCCGACAGCACGTCCCCTGCGACGACGACC	chr3R	805788423					0.04382519	0.092816849
PHT	100087230|F|0--29:G>T	TGCAGTATCACGGGGGAGGCCAGGTGGAAGACGCCGTGGACGCCGTCGACCGCCGGCCGGACGGAAGCA	chr3R	807549274	SECCE3Rv1G0196270.1	Cinnamoyl-CoA reductase 4	0.045865172	0.043051468
PHT	100021972|F|0--42:C>T	TGCAGTACCGTATCTCGAAGTATTCAAGACGACGGATACATGCGTGGCCACTGAATACCGCAAGTACCG	chr3R	812366754					0.032982999	0.086029222
PHT	100030141|F|0--65:T>G	TGCAGGTACAGAGAGCAGCGCTACAGGGGCGACCAGCGCGATGGACGTGCATGCTACACCCCCATTTGC	chr3R	816545577			0.022625156	0.066166839
PHT	100005334|F|0--34:G>T	TGCAGCTTCAAGGTTTGAAATGCCTCCTGTCGAAGCTGCAATCAGAAACTACAGTGCAGTGACTCGATC	chr3R	825928478					0.036408367	0.054968663
PHT	100052621|F|0--62:C>G	TGCAGCAGCATTTCTCAGGGGCGACCGTCATAACGATCGCGCATCGAATCACCTCGGTCCTTCACAGCG	chr3R	829097618	SECCE3Rv1G0198210.1	Multidrug resistance protein ABC transporter family protein			0.049966193	0.02361118
PHT	100011187|F|0--36:C>T	TGCAGGGATCAGGGGAGGAAGAAGGGGGACGCCTCGCCATGAAGGCGCTCATCCTCGTCGGGGGCTTCG	chr3R	830767607					0.039375083	0.053833762
PHT	100064882|F|0--65:G>C	TGCAGGGCGGTGTTGACGCAGTGCACGGCGCACAGCTTCCCCTCCTGCACCTCGTGGTACAGCAGGCCC	chr3R	833905445	SECCE3Rv1G0198610.1	Ataxin-3, putative, expressed			0.026923474	0.090940604
PHT	100041128|F|0--15:G>T	TGCAGAGTAACCGTGGCGGAGTTTGTTTCTGCACCTCTCGTTGGCTGGAGCCTGGGAACGATATCCACG	chr3R	835685732					0.041532565	0.021412103
PHT	100011712|F|0--12:T>C	TGCAGCACAGCTTAAAAATCCACACATTAGCAAGCCGTATAACCCTCATCGAAACGTGGATGCTTCAGC	chr3R	843557238					0.042233378	0.084826702
PHT	3730027|F|0--31:C>G	TGCAGTGCTGGTGCCTCAACTTCCGCGGCCGCGTGACCATCGCCTCGGTGAAGAACTTCCAGCTGACCG	chr3R	853944064	SECCE3Rv1G0200480.1	Tubby-like F-box protein			0.045073702	0.100644977
PHT	100010669|F|0--46:G>A	TGCAGGCCGAATTAAGAAGGAGAAAGTGTTTCCTCTGCTAATGATGGGGGCATAAACTACATAAACTAA	chr3R	863578124					0.049937811	0.014996026
PHT	100028371|F|0--61:T>C	TGCAGCAGGGGTAATCGTGACGAGAAACGGAGTCCACCGCCTGCACGGTTTCCCGTTGCGCTTTGTCAT	chr3R	863585037			0.013044575	0.033801321	0.042233378	0.044072742
PHT	100056879|F|0--51:C>G	TGCAGCTGAGATGGCGCTGTCGAGCGCGCACCCAGGTCCCCTGAACTCGTGCCGGGAAGAGGGGGCAGC	chr3R	868443213					0.049572303	0.016924568
PHT	100083448|F|0--18:C>G	TGCAGTGCTCCAACTTGCCCACACCTTGGCGGCCAGTGGAACGGGTGTTCCCAGGACCAGTGCCAGTAC	chr3R	871816795	SECCE3Rv1G0202220.1	Aspartic proteinase nepenthesin-2	0.025681435	0.030597456	0.021807058	0.049672551
PHT	100017798|F|0--60:T>C	TGCAGTGGCGTCGCTCCTACGAAGAAAGGGAGGCTCTGCTCAGAGACATATGCTGGTAACTGCAACTGA	chr3R	875235158					0.025656241	0.056507845
PHT	100025435|F|0--56:C>T	TGCAGCCATCTCTTGTAAGAACACAATCAAGACTGTAAGTTACTAGTACAACACTGCGCAAAATCCGAC	chr3R	876227859			0.041836717	0.051477099
PHT	100135259|F|0--32:G>A	TGCAGCAGAAGATGAGCGCCAAGGAGTCCGAGGCCTGGTCCAAGGTGCTTAGGCAGGAGGAGGCACTCA	chr3R	878340377	SECCE3Rv1G0202840.1	Protein ETHYLENE INSENSITIVE 3			0.015239025	0.231300919
PHT	100004307|F|0--51:A>G	TGCAGGGTCAGAAATTTAAGTGCACCAATGTACAACTATTGTTAGTTCATCAGTCTACTTACATTAAGC	chr3R	883043819					0.042355758	0.028987413
PHT	100026990|F|0--19:G>A	TGCAGTTAAGAATCGAGTTGCCAGGGAAGGAAACACAGAAGGTGTTTGATGCAGCCCTGACGAGCCTGG	chr3R	883144820	SECCE3Rv1G0203390.1	Trigger factor	0.039657344	0.045041898
PHT	100026990|F|0--34:A>G	TGCAGTTAAGAATCGAGTTGCCAGGGAAGGAAACACAGAAGGTGTTTGATGCAGCCCTGACGAGCCTGG	chr3R	883144820	SECCE3Rv1G0203390.1	Trigger factor	0.001410396	0.154009166
PHT	3745621|F|0--62:A>G	TGCAGCCATGCCAGCGGCCGCCGCTCCCGGAAACCGCGGAGACAACGGCACGACGGCAGCTCATTCTCG	chr3R	884601006	SECCE3Rv1G0203720.1	Serine/threonine-protein kinase			0.043759819	0.11033775
PHT	100001790|F|0--36:A>C	TGCAGTGCAGCTGTTAGTTAACGAACCTTTTCTGGCAGATGAGTACACAGTTTCAACGAGTTCATCATG	chr3R	886245334			0.032621104	0.02453109
PHT	100028279|F|0--66:G>C	TGCAGCACCTTGGGTTTGGCCCACGTTGGCGCGAGTGGATCTCCATGCTCCTTTCCACGGCCTCTAGGA	chr3R	888030548					0.037848811	0.037687421
PHT	100073970|F|0--12:T>C	TGCAGGGAGTGCTGTGCTTGCTGTTTTTGGAGTGTTTGCTGGTTAAATGTTGCCGTCTGTTGGTGCTGG	chr3R	889675305					0.042207921	0.027880789
PHT	100015010|F|0--53:A>C	TGCAGTATCTTCTCTTCAACAGAACATTTGGTAATAAGCTGGTAAACAACCACAGGTCGGGTCTGGCCA	chr3R	896163863	SECCE3Rv1G0204670.1	DNA/RNA helicase protein	0.022625156	0.065242099
PHT	3596886|F|0--35:G>C	TGCAGATGCTACGGGGTGTAGGATGGAAGAACGGAGAGAAAGACAACGACTTCGTTTGCGGCAATCGAA	chr3R	897697321					0.049057756	0.116827622
PHT	100117882|F|0--36:A>G	TGCAGGTTCGTTGAGAGCGAGCAACCCGACGCTTCCACTTGGGCCGGCCCAGGATTCGGCTTCGCTGCT	chr3R	897989605			0.001363737	0.153507633
PHT	3596750|F|0--36:G>A	TGCAGGTTCGTTGAGAGCGAGCAACCCGACGCTTCCGCTTGGGCCGGCCCAGGATTCGGCTTCGCTGCT	chr3R	897989605					0.040033647	0.059755749
PHT	100024188|F|0--27:C>T	TGCAGATTAAAGGCATGGAGTTTAGACCTGTTCCAAGCAAAGCCTCTGTCTCCAAACAGATGGTGGATA	chr3R	899684384			0.022584328	0.055343936
PHT	3596679|F|0--44:T>C	TGCAGCCTCTTGCTCACCGCAGCACTGGTCCTAGCGCTGAGCCATGGAGCCCTCGGTCATGGTGGTGCC	chr3R	900404863					0.04382519	0.077809995
PHT	100066998|F|0--51:G>A	TGCAGAGCCGCAATGATCTTTCAGCAGCATATGGCCGACCTTGGACGGGAGGAAGACAGAACGGCAGCG	chr3R	902945755					0.03857306	0.081523171
PHT	100036485|F|0--8:T>A	TGCAGTGATACCTATCTGCTCACATGCTCCTGCATGTGTAGTGTGCCAGTATTTGGTGGACCTTTGCAT	chr3R	906002488			0.044738146	0.041637611	0.041397392	0.035500061
PHT	100016041|F|0--64:C>A	TGCAGCACCGCCAGAAGAAAATTAAGCACTGAAAAGAGGTCATACGAGCACACTACAACAGTTGCAGTT	chr3R	911478521					0.041532565	0.037015234
PHT	100027826|F|0--48:A>T	TGCAGCAGCTTCATCCGCTGGCTGATCTTCTCTCTTCTCACCTGACCAACAGAAGCAGAGCATGAGAAA	chr3R	912772796					0.044091456	0.092436173
PHT	100007663|F|0--28:G>A	TGCAGTTTCTGTCCATGAAGCTGGCCACGGTGAACCCGCAGCTGGACTTCAACAATCTGCCCAGCCTCC	chr3R	912773082	SECCE3Rv1G0206890.1	Basic helix-loop-helix transcription factor	0.032673384	0.020207787
PHT	100027833|F|0--37:C>T	TGCAGATCTTGCCAGAATGCCCCGACCTGCACACACACGTTTGCCATCACAAATTGTTCATCGTCGACA	chr3R	912773631					0.049057756	0.018232099
PHT	100046551|F|0--8:T>A	TGCAGAATTCGGACCTTGACGCCGATCTGGAGCTGTGTAACATCCGCGGACTTCTTGGCCGAAGCTGGA	chr3R	913374078					0.0200629	0.093186441
PHT	3592681|F|0--14:C>G	TGCAGCTCGCCGCCCACGAACTCGCCCTTGATCGCCTCGAACACCTCCTGGTCGTGGGCCTTGGGCCGA	chr3R	923471015	SECCE3Rv1G0207670.1	Glycosyltransferase			0.041286533	0.121899475
PHT	100023452|F|0--20:G>A	TGCAGCCGTGGCCGTGTGGAGAAGCCTTAGGTCCTGGTAGATTATGTACTGTTGGCCTAATCCTCCAGA	chr3R	924019373			0.038834093	0.032391125
PHT	100127185|F|0--50:T>C	TGCAGGTTCCACCCCTGGTTCCAGCTTTGAAAGCGCCAAGAATGACGATGTCCTGGACGACCTCTTCAA	chr3R	924717598	SECCE3Rv1G0207800.1	RNA-binding protein			0.048168092	0.053675394
PHT	100048928|F|0--16:A>C	TGCAGTAGGTTGGCTCAGTGTTCAGATTGCCATTGCTGTTCAGTTACATATAAGACATCCACAGTAGAA	chr3R	926120058			0.022625156	0.084082552
PHT	100138998|F|0--18:C>T	TGCAGGAAGACGACGTAGCTGTGTCTGCCGCCGCCGCCACCGCCCCCGTGCAGGAAGAGGAGCCCTCAG	chr3R	926620687					0.038858498	0.077488187
PHT	3737096|F|0--16:A>C	TGCAGTTGCCACTTCCATGTGTGCTTGCCTGACCCTGTCATCCTGTGTACTCAGAGCAACTCCAACCCA	chr3R	929443062					0.047782154	0.099449652
PHT	100017087|F|0--10:G>T	TGCAGCTGGTGCACACACTTTTTCACATTCAGTGCAACAGACACATGGTACTGTTTCAGGCTCTTCCGA	chr3R	932804777	SECCE3Rv1G0208520.1	Chaperone protein dnaJ	0.039004608	0.01893625
PHT	3363571|F|0--10:T>G	TGCAGCTGGTTCACACACTTTTTCACATTCAGTGCAACAGACACATGGTACTGTTTCAGGCTCTTCCGA	chr3R	932804777	SECCE3Rv1G0208520.1	Chaperone protein dnaJ			0.049572303	0.04660896
PHT	100014713|F|0--45:C>T	TGCAGCAACGCAGCGACGAGAAAACGTTAAGAAAACCCAGCTTGCCAGTGGGCATCGTCGCATCCAATT	chr3R	936360258			0.020696174	0.029625639
PHT	100015464|F|0--6:T>C	TGCAGATGTGTAAATGCGATTCAGGTTGTGTCTTTGTAATGTGAAGAGATTGTGGCGTTGAGCGGCAGC	chr3R	936552107			0.041396117	0.041410614
PHT	100015464|F|0--63:G>C	TGCAGATGTGTAAATGCGATTCAGGTTGTGTCTTTGTAATGTGAAGAGATTGTGGCGTTGAGCGGCAGC	chr3R	936552107			0.004110653	0.103922035
PHT	100061764|F|0--28:A>G	TGCAGAGGTTGTCGTACCACGGGGACTGACCCTGGAGCTCATAGAGGTCATGGAGCGTGGTCCTCTTCG	chr3R	936936961	SECCE3Rv1G0209170.1	Transaldolase	0.026939054	0.023363089
PHT	100003005|F|0--61:C>T	TGCAGATGCAAACGAAACGAACAACAGGTCCAGTCAGTGGATAACCACGTTTAAAAATCTCCACAGGAA	chr3R	938420053					0.026923474	0.043953814
PHT	3898458|F|0--44:C>G	TGCAGTCAGCGAGACGAGAGAGGCAGAGACTCTTCCGCGCTCCCCGCAGAGTCAGAGTACCAGTAAGAC	chr3R	939051971					0.036490541	0.100968704
PHT	100039850|F|0--58:A>C	TGCAGGCTACGCGCCACATATGGTAGTATTGTACACACACACGGGCAAACTGTTGGTCAAAGTGGATCC	chr3R	939379057					0.027778173	0.040103957
PHT	100043254|F|0--44:T>C	TGCAGGTCCGCGCCAGCAAGAACATCGACAGCTTCTTGAAGCTCTCTGGCGCGATCCAGAACCTTGCAC	chr3R	940623541					0.02860321	0.085200238
PHT	100024591|F|0--50:A>T	TGCAGTGTATGTGTGCTAGCAGCGCCCTGTAATCGCCACCGCTGTCTGACAGTTCGTTCATTCTCAGGG	chr3R	953821941			0.039421021	0.036417462
PHT	100073506|F|0--45:A>G	TGCAGTTGTGCATAAATGTAACGAAACACGTGTCGTGCAATTGCCAAAATAGGCTTCAACAGGTGAGAC	chr3R	961144347					0.033345266	0.041824505
PHT	100104041|F|0--64:A>G	TGCAGGGCGACGCCGCCCTCATCGGCTCCGCGATGTCGTCCGACTTCATCGTCGAGCCCACCAGAGCGC	chr3R	961526522	SECCE3Rv1G0213580.1	Homoserine kinase			0.039761863	0.060804287
PHT	3909569|F|0--14:A>G	TGCAGCCCATTTAAACTCCATTTGTTAAGACATCTTGCCATGGCTAGGCTTATTTGTCTCGGTCTCTAT	chr3R	963441043					0.036408367	0.191013147
PHT	100045742|F|0--7:C>T	TGCAGCGCGGGCTGCGACCTCGCGCTGGGCTCCTACTACGTCACCAAGGACACGAACATCACCTACATC	chr3R	964159449			0.041836717	0.030314211	0.010050879	0.202498455
PHT	100004978|F|0--27:A>G	TGCAGCTTCCATCCCTACCATGTAGTTATAGACCATGTTGTTGCCACTAAACACGTCCTCAACATCACC	chr3R	964292832					0.033345266	0.028886669
PHT	100018403|F|0--50:C>T	TGCAGTTCATCTGCTGTTGCATGCAGTCTATGCTTTTCATAAAGTTAATTCATTGGTGTTTCTTCATGA	chr3R	964946974					0.045073702	0.033004704
PHT	100022713|F|0--52:T>A	TGCAGTTTTCACGTCGGTGTCAGAATTTGAATTTGAAACTTGGTATTTCAATTTTTTTAGACCCAAAGA	chr4R	2189059					0.04841637	0.016050099
PHT	100080290|F|0--52:C>G	TGCAGGCCGTCATGGCGGACCCAGCTGGGCTTCTCCGTCAGCATCTCCGCGCCCCCCTCTACCTGCCGC	chr4R	2332397			0.038852355	0.018797606
PHT	3909981|F|0--62:A>G	TGCAGCATGTCCAAGGCAGCGACGTCCATCCTCTTCCGGGACCTGTTGATGTTCTCCTCAACAAAGCTT	chr4R	3145474	SECCE4Rv1G0215090.1	Aldo-keto reductase, putative			0.027922091	0.175865149
PHT	100022208|F|0--61:G>T	TGCAGGATGAGGATTAGTTGAGTCGAGAACGTGGCCTGCACGAGACCCTACCCTACTACTGGCCGAGAT	chr4R	4811534					0.017592759	0.071604472
PHT	100043085|F|0--66:C>A	TGCAGAGCAGGGCAGAGTCTGGCCGTGCGACGCAGGAGGCCTATCTATTTATCACACTGGCCAGGCCAG	chr4R	8594529			0.007979084	0.09205709
PHT	100084549|F|0--58:G>A	TGCAGCTCTCGAGAAAGAGCTGATCATTCAGCTCGTTCGTGGCCTCTACAAAATTTTGGTTTTGATGGG	chr4R	8937349			0.046878023	0.041012708
PHT	100002834|F|0--50:A>G	TGCAGTGTGGGCTCAACGCCAACGCAAAGCAAGCGCATGATCAGGATGAGATACTGCTAAACAAGCTAC	chr4R	8937352					0.043759819	0.043507072
PHT	100058112|F|0--41:A>G	TGCAGTCCGATGATCTGCTCGATGTACGCCTCGGGCGTGGCACGGATGTCGCACATGCCCTCCACGTTG	chr4R	11358163	SECCE4Rv1G0216530.1	Endo-1,4-beta-xylanase, putative, expressed			0.02257989	0.091686376
PHT	100034598|F|0--32:T>C	TGCAGCAGGACACCATGTGCTTGAATGAAAGATGGACGGTAGATGCAAGTCTTTGCCGTCTTTATATAC	chr4R	11427234			0.045256577	0.022466787
PHT	100030487|F|0--58:T>G	TGCAGTTTTTCGTGCTGTGCCCATTAGACTATTAGTCCAATTCGAAACCTGTCGCTCATACACTCGATA	chr4R	12008841					0.030097335	0.032659984
PHT	100005684|F|0--48:C>T	TGCAGGTGGACCCTGAAAATGCTGAGATGGAGAAAGCGTTCACGTAAGCAGCTATCCTAACTCGTGCTC	chr4R	12751568			0.020676124	0.083182041
PHT	100017629|F|0--57:G>A	TGCAGAGCGTGACGTAGGCGTAGCGCATAAGAAACCTACACGTGATCTAAAGAAAAGGAAAAACTACTC	chr4R	17330773					0.044091456	0.071615126
PHT	100018522|F|0--52:T>G	TGCAGCCCGTCTCCCGCGAGAATGCTTCCTCGGTCGTCATTTACGCACAATTTTTATAGCCAAGATACG	chr4R	25613749			0.041918849	0.039087931
PHT	100045972|F|0--25:C>G	TGCAGCAGGTGGGCTGGAAGCTCGCCCAGTTCGCGCACACCATCCGCGTCGATTTCCAGTACCGCGGCC	chr4R	27705186	SECCE4Rv1G0219050.1	GAI-like protein 1	0.041671813	0.017560549
PHT	100085284|F|0--13:T>A	TGCAGGGCGTGGTTGGTTTGGGGCAAGGGGCGCTGGCGACGGCTGCGTTTGAAATTTGAGGGGCAGGGG	chr4R	31200010					0.024526689	0.112623992
PHT	100022842|F|0--31:A>G	TGCAGGCTGCAATTTACTTCAATAAAATACAATGTTTCTGCTTTGAGGAGCAAACACTTCTTCCAGGGG	chr4R	35557642	SECCE4Rv1G0220130.1	Cytochrome c oxidase assembly protein ctaG	0.042798654	0.030499094
PHT	100015836|F|0--64:G>C	TGCAGCACCCCAACGGCGACACCGTGAGCGAGAGGGACCTGGCCAGGCAGCGCGAGGTGGTGTCGGTCT	chr4R	37770263	SECCE4Rv1G0220320.1	Glutamate decarboxylase			0.045073702	0.084769131
PHT	3596375|F|0--35:A>G	TGCAGCATCACACGACCACATGACTCCGGCATTGAAGAACTCGCGCCATGTCAAGGACGCTTAGCTGTC	chr4R	48960450					0.046479354	0.043429967
PHT	100033040|F|0--57:T>C	TGCAGCTAGATGGCGAGCCCGTCTTCTGATACTAAGAGCATCTTCAGCCGTTCGGCCTCAGGGCCTTGA	chr4R	50211976			0.032621104	0.080439069
PHT	5047198|F|0--29:C>T	TGCAGGCCGACGCCGTGGTCGATGAGCCGCGCGAGGCCGAAGTCGCCCAGCTTCGCGCCAAAGGACTCG	chr4R	51549875	SECCE4Rv1G0221680.1	Kinase, putative			0.044091456	0.048507341
PHT	100074440|F|0--67:T>C	TGCAGCGACCGTGTAGCGTATACACACCGTGCGTCTCTAGGCTGTAGCCCCGCTGTAACTTTTGGTGTT	chr4R	51928630			0.02909966	0.035241609
PHT	100017732|F|0--47:C>T	TGCAGGCAAGAAAAAGAAAAGTGGGTACGTACTCTTGGATTTTTCTCCCTGAGCTAAACTAGTCCAGGT	chr4R	52323161			0.040531029	0.050704651
PHT	100004105|F|0--60:T>A	TGCAGGTGATCAAGTGGTGTTCTTGATGCTGCTTTTGGTGCAGCTCTGTGGACTGATATCTACCTTCGA	chr4R	55074787	SECCE4Rv1G0222170.1	Protein ZINC INDUCED FACILITATOR-LIKE 1	0.009377478	0.108083617
PHT	5037677|F|0--11:C>A	TGCAGAAGCCGCGCGTACGGCGTGCCCTCCAGCGCCACGTGGCGGACGGCAGCGCCGCTGCCGTCGCCC	chr4R	56293951	SECCE4Rv1G0222350.1	Kinase PfkB			0.043759819	0.066207558
PHT	100018265|F|0--32:G>C	TGCAGCTCCAACAGCTCGGTTCTGGATTCTCGGCAACATATATATGCATGTATCATCATTCAAGTGTCA	chr4R	57697051					0.042233378	0.120850405
PHT	3365115|F|0--62:C>G	TGCAGGGAGATGTACAAGTGCATCCAGGACGAGCTGCTGCCGCTGCTCCTGGAGCCCATGACCATCGCC	chr4R	61869092	SECCE4Rv1G0222690.1	RING/U-box superfamily protein			0.034066438	0.095133105
PHT	100011803|F|0--44:T>G	TGCAGTTGGACGTGGGCTCTCATAGGGAACTATTTCATTTCCTGTTGCATACAATAAATAAAAGAAATT	chr4R	66932881					0.032982999	0.098974833
PHT	3578614|F|0--20:T>C	TGCAGGTTCCACAGAACCTCTTCGATGGAGGGCCGGGTCGAGGATTCGACGGATAGGCATTTGATCGTG	chr4R	69317427	SECCE4Rv1G0223400.1	Receptor protein kinase-like protein			0.049057756	0.069225219
PHT	100041863|F|0--7:T>C	TGCAGTATGCCGCGCAGCTCCAGGCGACGGCCGACGGCGATCTGAGATCAGAAGTTTCCTCGCAGGCCT	chr4R	69317430	SECCE4Rv1G0223400.1	Receptor protein kinase-like protein			0.043759819	0.098626457
PHT	100005883|F|0--63:C>A	TGCAGCAAAACCTGAACCTGAAGGCTGAAGCAAACCCTCTCAAAAAACACATACAGTAGCAAGCAGCAA	chr4R	74387488					0.019645645	0.060191011
PHT	100052586|F|0--42:G>A	TGCAGGCAAGGCAAACAAACCAAGCACAACCTGAAATTCTCCGCCCAGCGGCTCACACGGTCACACTCC	chr4R	87080477					0.022656006	0.037031709
PHT	100088983|F|0--13:G>T	TGCAGCTCCGCCAGCTGAGTCGGGAGTGGAGGGACTCCGAACACTCCCTTAATTAACATGATTGGCTCC	chr4R	87892921					0.040060818	0.052737285
PHT	100010231|F|0--60:G>C	TGCAGTTCGACAGGTACAGATACGTCAGGTTCTTGAGGTTCCCAATGCTCGGAGGCATCTGCCCTTGAT	chr4R	97809715	SECCE4Rv1G0225670.1	Receptor protein kinase, putative	0.020007038	0.02723059
PHT	100019012|F|0--52:G>A	TGCAGTTTCCGAGCAGTTGCTCGTTCCGCTTGCCAAGTCGTTGAGGATTTCGGAGCAGCGGAAAACTTG	chr4R	99702304					0.022656006	0.083193233
PHT	100008198|F|0--37:T>G	TGCAGGTACTACAAAGCTTAGGCAGGAATGGGCACTGTTTTTCAAGTTCAGCAGAGTTTTAGCTGCACA	chr4R	106213818					0.042207921	0.051033076
PHT	100055674|F|0--68:A>T	TGCAGCGCCTCGCGGGTGCCAATGGCCGCTTCTGTATAACGTGACGCTCGGACACCACCAACTCCACCA	chr4R	109015494					0.028841742	0.073458626
PHT	100013047|F|0--22:G>C	TGCAGCAAGTTAGGTGTCAAAGGTTAGTTTATTCACCACAATATATTCTTCTGTGTGGGAACCCCAATT	chr4R	111875416					0.043759819	0.023102995
PHT	100078189|F|0--62:C>A	TGCAGGGAGACGATGATGGAGTACAGGACGGAGCTGAAGAAGCTGGCTGCGAAGATGCTGGGCGTCATG	chr4R	111876044	SECCE4Rv1G0226610.1	1-aminocyclopropane-1-carboxylate oxidase	0.035984059	0.043515906	0.040575579	0.102178503
PHT	100061617|F|0--39:T>C	TGCAGAAGCATGCATGCATGCATACTCCTAGGACAAGAGTATAACCTTACCGAGGTGAAAGTTTGTCAT	chr4R	121843333			0.011548184	0.034550619	0.037547662	0.023200558
PHT	100066811|F|0--56:C>T	TGCAGTACTTGTTCGTCGCAGCCAATCGGTTGGCAGGTCGATTTCCACAGGCCATCCTGAATCTTTCTA	chr4R	129381698	SECCE4Rv1G0227900.1	Receptor-kinase, putative	0.026400131	0.111303561
PHT	100051752|F|0--46:T>C	TGCAGCTCCGCCGACTCCGCGAGCTGAGTCTGGAGCGGAGGGATTCTGAACACTCCTGAAGCCAACCGA	chr4R	139317627					0.049966193	0.028524338
PHT	100029852|F|0--33:T>C	TGCAGATGCATGCGGTCACGATCGTGTCTGTTTTGAGCCTTCATTTGTTCGTCTACAACCACACTTGTC	chr4R	142687642					0.042355758	0.116601598
PHT	100054304|F|0--67:G>C	TGCAGCGCCCCTCCTCCCTCGTCTCTATGTGGGTTCACCAGGGCAAGACTCTCGGCGCTGTTGCACTGC	chr4R	181106962			0.014061033	0.034756987
PHT	100046243|F|0--8:C>T	TGCAGCACCACGGCCGTCGACACATCATCCGCAATGGCCCTGGCTAGAGCGCATGGTCCTCCTCAGTGT	chr4R	181877918			0.041847727	0.034555268
PHT	100008716|F|0--15:C>A	TGCAGCAGGAAGATCCAGAAGCTGTCTAGCATGCCCTGACAAACCAGCATGGCCTCCTCGCTCCGAGAT	chr4R	186028723			0.042840588	0.038807027
PHT	100024658|F|0--17:A>G	TGCAGCAACCACCCCTGATCCACATCGACAACAAACTCCTTGTGGTACAGGCTCTTGACCTTGCCTGTT	chr4R	193283390	SECCE4Rv1G0232010.1	Scarecrow transcription factor family protein	0.013095616	0.033235687	0.018354308	0.042823211
PHT	100044522|F|0--16:T>C	TGCAGCAACACATCCTTCGTCAACGCCCCGAGAAGCAACGCGCGCGCCATCTTGTCCTTCCGCGCATTC	chr4R	196603046			0.04135085	0.020128055
PHT	100040241|F|0--63:G>A	TGCAGATGCTCCTATGAGCTGTGGAGAGCCAAACATTAGTACAGAACCAAACACACGCCAAAGGAGTTG	chr4R	241412977			0.044951009	0.02478655
PHT	100035347|F|0--49:A>G	TGCAGTAAGCATCTTCCTCAGATCCATCTCCCCTCCCTTCAGTTCTGTTACTTATGGCCGAATCCCGAT	chr4R	256614276					0.045346419	0.028154017
PHT	100049677|F|0--6:G>A	TGCAGCGTAAACCGTCTGTTGTTGTTGGTGCTTCAATTTCCCGGATGATCCGGACCCCGGCCCGGATGA	chr4R	263628497			0.045865172	0.019289421
PHT	100004499|F|0--19:C>T	TGCAGTTAGCAGGCACATTCGCTGATGTTTTGGAGATGAGAGCCTTATTGGCTATATTAGCATGCCCGA	chr4R	270296694			0.046878023	0.017428091
PHT	100007266|F|0--44:A>G	TGCAGAGGCACATATTTTCCCTAAGCTCACGAAAAACATGAATAATTGTCCTTGTATGCCTGACGGAAT	chr4R	463615910			0.029457449	0.02702424
PHT	100053535|F|0--28:G>A	TGCAGGTTGATTTCAGTTAAGCGGAGGGGCGTTTTTGCAAAACAGCCACGACGGACGACCAGAAACAAT	chr4R	463617109			0.005266876	0.067569087
PHT	100010153|F|0--27:G>A	TGCAGAAATATTCGTCGCGTTCTCAAAGCCTAAAGCAGAACGAACAGAGAGAAAGACACAGCGTCACCG	chr4R	474164052					0.025684996	0.109285355
PHT	100007744|F|0--17:A>G	TGCAGCTCAAATCCCTCAGCGGATTAAATTGGGCGCAGAAAGAGCAGTGCAAATTGCCGCTGGATGCAC	chr4R	499468393					0.046758176	0.047131607
PHT	100012743|F|0--47:T>C	TGCAGCAGCGCTCAACCAAACTTGTAAGCACAAAAAACAGACACTTGTAGACACCCAAACAATCAGATA	chr4R	502280151			0.025206479	0.029558824
PHT	100033669|F|0--25:G>T	TGCAGGTAACAATGGTGCTGGCAGTGCCTACCAGCCACCTCCAACAGACAACAATGGCGTTGGAAGCAC	chr4R	502958115	SECCE4Rv1G0243470.1	Pathogenesis-related thaumatin family protein			0.044057701	0.063873991
PHT	100013365|F|0--6:T>C	TGCAGTTAGGCCGTCTTTTTTGGCAGAAAAACAAATAGGCCGTCAAATCCGACCATGGCTGCTTGCTAG	chr4R	502999581			0.035701881	0.030592025	0.044867529	0.018922677
PHT	100039923|F|0--5:G>A	TGCAGGCACACGAGATCCGACGCGGCGGTCACAGCGTAGTTGCCATCATCGCTGCCATTGCTGGCCAGC	chr4R	503501841	SECCE4Rv1G0243530.1	Chorismate mutase	0.029507391	0.035692045	0.049571521	0.015632016
PHT	100039923|F|0--53:G>T	TGCAGGCACACGAGATCCGACGCGGCGGTCACAGCGTAGTTGCCATCATCGCTGCCATTGCTGGCCAGC	chr4R	503501841	SECCE4Rv1G0243530.1	Chorismate mutase	0.038834093	0.038367055
PHT	100017015|F|0--49:C>T	TGCAGGTGAAGCGAAGCTCCGAGTCGGTTGAGGACGTCGGCGACAAGGACGTTGATGACATGAGGACGA	chr4R	514508467	SECCE4Rv1G0244390.1	rho GTPase-activating gacO-like protein	0.005777256	0.055896724	0.043759819	0.050058819
PHT	100021118|F|0--53:T>C	TGCAGTAAGCATCTGATTCGACAATGAACTTGTGCATCACCTTTTTATTAGAATTATATATATCCAGCA	chr4R	514923926					0.036209598	0.050371551
PHT	100014435|F|0--40:A>G	TGCAGGATTTGATCGCTGCGTATCAGCGCCCTGCATTTAAACCATTCAAGTTTGAATGTTCTTCATGTG	chr4R	517239587			0.019450462	0.041916577
PHT	100034561|F|0--13:A>T	TGCAGAGGATTCTACAGATGATTTACCAGGCAAGCATGGTACACTCATATAGCAAGTCCAAAAGCACAA	chr4R	520269892			0.032673384	0.036403753
PHT	100048290|F|0--58:C>A	TGCAGCGCTCCTGGATCGTCCTCATCGCCGCCGCGATCCTCATGGTGCCCTTCTACGTCTTCGCCGAGC	chr4R	523547540	SECCE4Rv1G0244970.1	Protein DETOXIFICATION	0.016976318	0.05210528
PHT	100009911|F|0--45:C>T	TGCAGAAAGAAGAACATGAGCAAACTGCCAGGAGCTCTTACAGGCCAAAGCTTAATGTATCATTTGAAC	chr4R	524086291			0.016211594	0.065339995
PHT	100028861|F|0--6:C>T	TGCAGCCGCATTCAAATCAAATCCTACATCTCTCACCAGGAAACAAATACTCGTTGTTTCTCTCTCTAG	chr4R	524904139			0.007148849	0.057367656
PHT	100002616|F|0--36:T>C	TGCAGATAGTACAATGATATTGTTTCAAGAATCTTTTATATCATTCATGTACCTGCCATCCAGCCTCAA	chr4R	535129130			0.024857295	0.027921567
PHT	4105619|F|0--30:A>G	TGCAGTCTAAAACTCAAATAATGAAAGAGAACCTATCAAGATCCCGGTTTCTATGGCCGACAAAAGGAA	chr4R	544892079					0.049057756	0.038858447
PHT	3889599|F|0--25:T>C	TGCAGCTCCTCAGCCCGCTCGACGATGCCATCGCCATTGTTGCTCTCTGGATGCTGGCTGTTCCTTGCT	chr4R	547386220					0.049057756	0.038858447
PHT	100057656|F|0--6:G>A	TGCAGCGGCACCACCAGTCCCCACCTCGGGGTCGCGCATGCGGTGCAGGAAGACGCTGAGGGGCAGGAC	chr4R	569904705	SECCE4Rv1G0248280.1	Nuclear transcription factor Y subunit B	0.012381715	0.066781851
PHT	100157119|F|0--48:G>A	TGCAGCCAGCTCACGCGGCAGCTCTGGCCACCGCCCTGGAGAAGACGGGCGCGGCGTTCGTGTGGGCCG	chr4R	572535071	SECCE4Rv1G0248480.1	UDP-glycosyltransferase			0.044656294	0.047583314
PHT	100108026|F|0--39:A>G	TGCAGGACACAAGTGCAGAGTGAGAACACCCCAAACTAAAAAATCATGGGGAAGAGCACGTGACAGCAG	chr4R	574641933					0.049057756	0.038858447
PHT	100085580|F|0--19:T>G	TGCAGCGAGTAGTAGTCGTTTGGCCAGCAGTCATCGAGCTTGACGTGCGGCCTCTCGCCGTCGGCCCAC	chr4R	582147226	SECCE4Rv1G0249360.1	CONSTANS-like zinc finger protein	0.03686715	0.039887158
PHT	3597175|F|0--16:T>A	TGCAGCACACTGCGACTGAGCGCATGGAAGTAGAGCAGTCATGCCGAAGCCTGTTGATTATGTTCTCTA	chr4R	584818790	SECCE4Rv1G0249620.1	Nucleolar pre-ribosomal-associated protein 1			0.049057756	0.038858447
PHT	100031191|F|0--38:G>A	TGCAGCCGAGCCGTGGTCAGGAATTAAAGCCCATTAAGGCACAGCCCAGTCCAACCAAATTCAGTGCAC	chr4R	601777947			0.026987142	0.055533833	0.047772188	0.050029438
PHT	100043888|F|0--50:C>T	TGCAGCAATGAGTGCCGCTGAAGTTTTGGACGTGGAAGAGCATTATGGTTCGGCAAAAAAGGCGAATGG	chr4R	603901633			0.030949211	0.025865717
PHT	100045032|F|0--16:C>A	TGCAGCCCAGCCTCCGCTTGCACGAAACGCACCTAGCAAAGCAGGTGTCCTCCGATTGGGATGACCGCA	chr4R	607078236					0.036408367	0.047839077
PHT	4490030|F|0--30:G>A	TGCAGAAACTATTGTAGCAGACCGTGAGCAGCGAGCAGTGGTCACGTTGATCAAAACAAAGAAATAGAT	chr4R	609613904					0.026923474	0.139180499
PHT	100085819|F|0--45:G>C	TGCAGGTTCATTGTTGCAGGGGAAGAAACGAACACCGGCAGTCGCGGGCCGTGACAACGACGCCAGAAA	chr4R	610187598					0.049365921	0.081376249
PHT	100036426|F|0--32:C>T	TGCAGTTGAAGCAGGGGTTCGTTGCTATTGTTCTGGGCTGCACTGTTCCAATGTGTTCATCCAAAAATT	chr4R	617009248			0.041876689	0.030728479
PHT	3364408|F|0--65:A>G	TGCAGCACAAGCTCGTCCAGGCCGCCCCTGACCATGGCCGGGAAGAAGAGCCAGATCCCCGTCCCACCC	chr4R	617152205	SECCE4Rv1G0252680.1	MBOAT (Membrane bound O-acyl transferase) family protein			0.04935064	0.052291283
PHT	100010744|F|0--18:G>A	TGCAGAGGAAGAAAACGGGAGAAATCGCCGAGGAGTTGGACGAGGTTTGGATCCAGCACCTGAAGCATG	chr4R	617980558			0.047046083	0.032838354
PHT	100022262|F|0--15:A>G	TGCAGAAGGCAAGCGATGGTGCTCGGGAATCAACTCCAAGCTCGTCGCCTTCATGCTCACAGTGCCATC	chr4R	631953111	SECCE4Rv1G0254010.1	Galactoside 2-alpha-L-fucosyltransferase	0.015578844	0.052445869
PHT	100000142|F|0--17:G>A	TGCAGTCCATGCCACGAGTGGTGCTTGTAGTACCAACCGTTTAACGTACTTTTGTTGTCACGTATACTT	chr4R	642774595			0.046878023	0.025274856
PHT	3595577|F|0--31:G>C	TGCAGATCCTGCTCGAGTACATGGACGGCGGGTCGCTCGACGGCCGCCGCATCGCCGACGAGCCCTTCC	chr4R	656356127	SECCE4Rv1G0256370.1	Protein kinase			0.04322127	0.069227568
PHT	100058991|F|0--42:T>C	TGCAGATTCTTATAGTGCCATCTATGTACAACTAGCTATCTCTTATAGGAAAAGAGAGTGGTTTTTCAG	chr4R	657192481					0.047094604	0.046319131
PHT	100036067|F|0--10:G>A	TGCAGCAAACGAGAGCATCCATTCTCCTCTTGTCTTCCTCTTGTCTTCGCACCAGAGGCTAAAAATACA	chr4R	658507556			0.03841834	0.057252329
PHT	100010896|F|0--49:T>G	TGCAGCCACCTCTACTCCTGAATCAACAGCCACGGTCAAAATCAAACGCTTAACGCCACGCAAAAGGGC	chr4R	659272261			0.046878023	0.049729768
PHT	100015424|F|0--62:C>T	TGCAGCTAGCATTCCTCAACTGTCCAGCGTCCAGCCAGCAACGGCCAGATTAACTTCACTCACTGCATC	chr4R	662137420			0.019247123	0.056369469
PHT	100045277|F|0--59:G>A	TGCAGCCAAGCTTCTCTGGAGGGGAGGCGAATTCTGGAAAGAGAGCATGGGTCTCCTGGGCAGCGCAGA	chr4R	672696085	SECCE4Rv1G0257750.1	Zeta-carotene desaturase	0.018543962	0.043163132	0.042355758	0.021493041
PHT	100014679|F|0--52:G>A	TGCAGGTTGCCGTGGCGTGGTTAGCAGCAAACCACACATGTAGTACAAAGGAGCTGAGCTTTGATCCCC	chr4R	673755775					0.042233378	0.029022498
PHT	100016971|F|0--59:A>G	TGCAGCTCTGTGACCACCATGTGCTCCCTCCGCCTCCGCGGTCAATGCCACCGCGCTCCACGCCTTGGC	chr4R	673761477					0.047142815	0.056147444
PHT	100004101|F|0--51:T>C	TGCAGCCACTGGCAAGCATGCCTTCGCCATCTTGTACGTCCAGTATCTCTGTAAGGACCTTGAAAGAGT	chr4R	674323327					0.049668644	0.062280887
PHT	100037050|F|0--9:C>T	TGCAGGAAGCCGTCGCGCAACAGCTGGAGCGCGCGTTCGCGGCGCACGAGCCTTCGGACGACTCAGCGT	chr4R	680591966					0.044377285	0.020380579
PHT	100080630|F|0--52:C>G	TGCAGAGCGTGGCTTGACAGACGTGACAAGACAGAGGTGCCTTCGAGACGAACCTGGCTAGCATTGCAG	chr4R	680978550			0.046055915	0.021275898
PHT	100066187|F|0--13:G>C	TGCAGCGTGGCTGGACTTGAGCAGGTGCCTTCCAGACGAAGGTAGCTGCATTGCCCGAGGACCATGTGC	chr4R	681573247			0.02276565	0.027707571
PHT	100017068|F|0--25:C>T	TGCAGTGCTGCTGCGGCCCCTCTGACTACTGGATTGGAGTAGAAAGTCTTCGTTCAGTCACGGCCGCGC	chr4R	687638590					0.013786461	0.049656121
PHT	100077747|F|0--25:G>A	TGCAGGAAGCGGGTGAGCGGCAGCAGCATGGCCATGGCGAAGTGCTGCGGGATGAGCCACACGCTCATC	chr4R	694531419	SECCE4Rv1G0260260.1	Protein DETOXIFICATION			0.025615601	0.203134672
PHT	100046674|F|0--29:C>T	TGCAGGATAGTGCCCAGTGGCTAGAGTTACCTATCTGTCTCCTTTTGTTATGTAGCTCCTCGGTTAGTA	chr4R	700797771					0.043807923	0.095001604
PHT	100072999|F|0--27:G>C	TGCAGCGCTCTTGACTCGGCAAGCTGGGTGCAAAAGAACGATGGGCTGGCATCTTGGAGAGAGCCGAAG	chr4R	700812136					0.025615601	0.145394292
PHT	100056008|F|0--27:G>C	TGCAGTTTGCATGCAGCCTGAGTCGATGAATGGCTTTGCTCTGAATCTGCTCGTCCCTCGTCGCGCCAG	chr4R	701077296					0.036537255	0.041496365
PHT	5215261|F|0--25:G>C	TGCAGGCGCTCGTCATGGACCGCGCGGTCGGGCCCTTCACGGTGCCGGCGGGGTCGATGATCGTCGGCT	chr4R	702465254	SECCE4Rv1G0261540.1	Protein NRT1/ PTR FAMILY 2.1			0.049057756	0.053272056
PHT	100035463|F|0--34:A>T	TGCAGCAAAAACCCGAGAGAAATAATGGTGTACGAGGCAGTGGAGGCCGTTGCTCTCAGGAGCCAGGTT	chr4R	704709910			0.040531029	0.031353392
PHT	100035463|F|0--65:G>A	TGCAGCAAAAACCCGAGAGAAATAATGGTGTACGAGGCAGTGGAGGCCGTTGCTCTCAGGAGCCAGGTT	chr4R	704709910					0.042233378	0.062760169
PHT	100033221|F|0--54:C>T	TGCAGCAGCAGCCCGAGAGAGAAATAATGGTGTATGAGGCAGTGGAGGCCATTGCTCTCAGGAGCCAGG	chr4R	704714683			0.030037975	0.043978284
PHT	100005199|F|0--51:T>A	TGCAGAACTCTTTCAGCAACAACACCAGGCAGTGATGGTGGTGTTACTTCCTTCAGGTACGTGCCATCA	chr4R	705088760			0.02219447	0.066687117
PHT	5201328|F|0--44:A>G	TGCAGTGAGGCGTCATGGCGTTGGCGGTCGTGGCGAATGTGGCCACGGTGGCACAGCTCATCGAGCAGG	chr4R	705685659					0.043132849	0.061853712
PHT	3908390|F|0--25:C>T	TGCAGACCGCGGCATTCATGTCAAGCAGAGAGTTCCGGTTCCTGACGGCGTGGTGGAACACGGGGACGA	chr4R	706705780	SECCE4Rv1G0262240.1	F-box family protein			0.044377285	0.05125096
PHT	100070883|F|0--22:C>A	TGCAGACCAGCGTCAAGCCAGGCGACGTCGCCACCTTCGGCCAGCTTCGATTCCTTGCTCCTCTCGCGG	chr4R	713718535					0.041397392	0.055093015
PHT	100128839|F|0--22:C>T	TGCAGGTCAGTAACCACGGTGTCGAAGCCGCCGTGATAGAGAGCATGAGAGCTGCGTCGAGGGAGTTTT	chr4R	718691851	SECCE4Rv1G0263980.1	2-oxoglutarate (2OG) and Fe(II)-dependent oxygenase superfamily protein			0.042233378	0.050855603
PHT	3731129|F|0--19:C>T	TGCAGGTCACCCTGCTGCGCCGTGGCGGCATCGCCGTTGGCGTGACCGTCCACCACGCCGCCTGCGACG	chr4R	721646862	SECCE4Rv1G0264670.1	Anthocyanin 5-aromatic acyltransferase			0.049048359	0.069006892
PHT	100034659|F|0--6:T>G	TGCAGATACGGGTGAATAGAATGCCTGTCTATACATGTCCATGACAGTCGTTGCTTCTCCCTGCAAAAT	chr4R	721974269					0.032086606	0.044228337
PHT	100006621|F|0--48:A>G	TGCAGGCGCTTGGGTATAGTATCTATCACCAACACATACATTCACTTAACCCAGCATGACGGTCGGCGC	chr4R	722544317			0.023839027	0.027895396	0.03163267	0.028773903
PHT	100123354|F|0--11:C>T	TGCAGACAGGACAGACTGGTTCAAATTATTGAATCGAATTATAATTAAAAGTAAAGAAACTAAAGCATG	chr4R	727885880					0.04779333	0.074283657
PHT	100024162|F|0--16:C>T	TGCAGATAATATTTGGCGGCGGCGGCGCCAGTGAGCAACCTGAAGAGGAGCCTTCAATGATGACCAATG	chr4R	732199282	SECCE4Rv1G0266540.1	DUF1995 domain protein			0.044377285	0.019028859
PHT	3743031|F|0--48:A>G	TGCAGTGCTCACCGTCTTCGACACACTCAGCGTCATGCTCTGGGTGCCACTTTACGACCGCGCCATCGT	chr4R	733576955	SECCE4Rv1G0266790.1	Peptide transporter, putative			0.049717177	0.067173519
PHT	5213784|F|0--33:C>G	TGCAGTTCCGAATCAATACCGGGATGTTAATGACGACCAAGATTTAGCACAGACAGTACTACACAAAGC	chr4R	735993358					0.042207921	0.077561583
PHT	100036421|F|0--55:T>A	TGCAGAAGCATGACGACGGTGCTCGAAGTAGGTGAAGTAGAACCCGAGCGTGATGTAGACCATGCACGG	chr4R	736905702					0.045073702	0.031409875
PHT	3902754|F|0--27:C>T	TGCAGGCGGTTGTAGCAATTCGAGGTGCTGGTTGTAGCTCAGCTGACACCGATTGTAGAAAAAATTCTC	chr4R	737696661					0.046549417	0.066767654
PHT	100003392|F|0--20:C>A	TGCAGGATTAGATGATGAGGCGCCAACAGGTCTCCAGCTTCATGCCCTGCTCTGTCCCAAAGCTCGCAG	chr4R	742642060			0.007431068	0.134230928
PHT	100050230|F|0--44:A>G	TGCAGGGAGGCCCATTTAGCCCGACTCGTTTTTTGGAAATACAAACATACAATTAACGATGGTTTTTGA	chr4R	744096984			0.033584411	0.075155785
PHT	100115821|F|0--16:C>T	TGCAGCTCATGTCCAACGACAGGTTCAAGAGCGTGGAGCACCGCGTGGTGGCTAATAACATGGGGCCCA	chr4R	744158846	SECCE4Rv1G0268720.1	2-oxoglutarate (2OG) and Fe(II)-dependent oxygenase superfamily protein			0.024344066	0.181144811
PHT	100072719|F|0--15:T>A	TGCAGCCATCGATCCTGGCGCTCCAAGGTGCCAGCAAACTGCCCCTTCCGAGGAAGATCTTTGCCGTGG	chr4R	749626202	SECCE4Rv1G0269590.1	F-box family protein	0.004070134	0.07562246	0.010050879	0.072712174
PHT	3888435|F|0--30:T>C	TGCAGGTTCCCCTCCCCGTCGCCATGTTGATGTCGCGGGTGATCGACTACGTGTGGCTGAACGCCGACG	chr4R	750058220					0.049057756	0.06440745
PHT	100008850|F|0--23:A>G	TGCAGCATCCGCATCAAGAGACAATTACAACTTACAACATTAACACCCGTGCAAGTATTGTGCCGAGAT	chr4R	750604520			0.013311386	0.074773542
PHT	100054047|F|0--63:G>A	TGCAGCTCCCTCACGCTCTCTCTCTCTCTCAGACACAACAAAGACGAAGGAGGAGGAAGAAAGGAGACA	chr4R	751114010			0.012147105	0.066011011
PHT	100001842|F|0--27:C>A	TGCAGACACGATCAATCATGGCCATATCTCCCTGCCCTGCAAACGTATCTCTGCCCACTGTACGGATGC	chr4R	754157462			0.048768392	0.036147735
PHT	3362362|F|0--28:C>T	TGCAGACACGATCAATCATGGCCATATCCCCCTGCCCTGCAAACGTATCTCTGCCCACTGTACGGATGC	chr4R	754157462					0.043759819	0.0501817
PHT	100025609|F|0--55:A>G	TGCAGGAGGCGGAGCTGCTAGCGCTGCTGAGGGACGAGCAGGGCGAGGAAGACAGAATGATCCAGACGG	chr4R	759417141	SECCE4Rv1G0271100.1	ATP-dependent DNA helicase DDM1	0.018002177	0.069475418
PHT	100067298|F|0--16:A>C	TGCAGTAGGCGGTTCCACACAGCATGACAACCACATCGACTTATTTCGTGATGCGGCTGTTCCTCGGAG	chr4R	759850185			0.026809432	0.039947088	0.039761863	0.091544404
PHT	100055281|F|0--19:G>C	TGCAGCCACATAATGGTAAGAAGATGCGTATCCATTGCGGCAGCGCTGCTGCTGCTGCTAATCTCGGCA	chr4R	759855270			0.02219447	0.066935656
PHT	100055281|F|0--60:A>G	TGCAGCCACATAATGGTAAGAAGATGCGTATCCATTGCGGCAGCGCTGCTGCTGCTGCTAATCTCGGCA	chr4R	759855270			0.001410396	0.125694017	0.005037073	0.312956478
PHT	100084156|F|0--53:T>G	TGCAGCGAGACGGCCGTGACGCGGCCCTCGCGGTCGCAGGCGACGCCGACGAATGCGCCGCCGCAGGGG	chr4R	763508125	SECCE4Rv1G0271690.1	Receptor-like protein kinase			0.049365921	0.05227577
PHT	100008534|F|0--41:A>G	TGCAGATTCCAACAACTTGTAACGTACATACTCCAACTGAGATGTAACCCGATGTAGGCTTCCTCTTCT	chr4R	767971540					0.02257989	0.050623769
PHT	100083380|F|0--8:A>G	TGCAGAAGAGTTTCAGCTAGCTAATTATTCAACTTTTGTTGGCTTGGCAGCCCGCAATATTCTAGTGAT	chr4R	771717639					0.019645645	0.125000973
PHT	100039450|F|0--40:G>C	TGCAGAATACGCCAAAGCTGATTGCCACAATCCCAAGGGAGAAACTCGCCTATCCTGTCTATCTGGTAG	chr4R	772075638			0.02369933	0.056508701
PHT	100038517|F|0--21:G>A	TGCAGAATCATCCGCTTGCGCGCATTTCTTTATCGGTTTACCAGCGAAGTCAAGAAAGCTGCTCCATTG	chr4R	773058128					0.043568755	0.073669999
PHT	100008380|F|0--11:G>A	TGCAGCCAGCAGCATGTCAGCAATTGAGTTGATCTTGCAATCCAACAAATTTGGTCTCGGGCTGTATAC	chr4R	779383616			0.021462314	0.080232697
PHT	100016091|F|0--10:C>T	TGCAGTTTCTCCTTAGCCATTGTCAACCCAGTCGAGATCCATGGCACAATCTGAAGTTGCCCGCTGCCT	chr4R	780414137			0.025695639	0.042058718
PHT	100028338|F|0--62:G>T	TGCAGATGTGCCGGTGACTGACGACAGCCTCGATGAACTCTCACTAGTGTGCCACACCTCGAGGCCGTC	chr4R	783669407			0.046239681	0.022011837
PHT	100031499|F|0--41:T>C	TGCAGAACTTAGTGGAACTTGTCTCTTTGAGTAACCTGCCTTCTTCCACGAAAACTATCTTGTGTGCTC	chr4R	789164601					0.039375083	0.066675484
PHT	100017623|F|0--50:C>G	TGCAGGTTGGAATCAGGGGTCATTGGTGTCAAGAACCTTCCAAAACTAACCGAGATTTTACTTGATAAC	chr4R	792078093					0.034393953	0.063013099
PHT	100009888|F|0--54:C>T	TGCAGCTTTTGATGTTGTACGCCAGCAGCAGCATTTGATAGGTCGAGGTCTTCTCGATCAATCTCGCCT	chr4R	795061774			0.027010939	0.07788972	0.036209598	0.077835744
PHT	100018755|F|0--42:A>G	TGCAGTTCTTGTCCACGAGACACGAACACCCAAGAAAAGTCTACCTCCTTCGCAGAAAAACAAGGGAAA	chr4R	795080609					0.042143874	0.054628183
PHT	3742324|F|0--47:C>T	TGCAGAAATTGCAGCAGTCAGCTCGCCGGCACGCCAAGCTCGATGGTCGTGGTCACGCCGTTGAGGTTG	chr4R	802304705					0.049057756	0.081666741
PHT	100189937|F|0--39:A>G	TGCAGGTGGTGATGGCCCGCTCCGCCTTGTCGTTGTTCTAGGCGCGGGTGTAGATGTAGCGGCTGCCAG	chr4R	803341565					0.045073702	0.047350716
PHT	100015709|F|0--52:A>C	TGCAGGTTAGTAAGGTGGCAATGTCTGATAAAGAGGCAAACCTCTTACGTTGATTTTTTTTACTATGCA	chr4R	804730548			0.02369933	0.028113357
PHT	5224683|F|0--13:C>T	TGCAGGCGCTCGCCATGGACCGCTCTGTCGGAGCTCACTTCAGCATCCCGGCGGGGTCGGTCGGCGTCA	chr4R	806987034	SECCE4Rv1G0278050.1	Protein nrt1 ptr family 1.2			0.047094604	0.093247883
PHT	5224683|F|0--34:T>A	TGCAGGCGCTCGCCATGGACCGCTCTGTCGGAGCTCACTTCAGCATCCCGGCGGGGTCGGTCGGCGTCA	chr4R	806987034	SECCE4Rv1G0278050.1	Protein nrt1 ptr family 1.2			0.046744084	0.089576187
PHT	100009465|F|0--56:A>C	TGCAGATGACATGGTGATGAGTGTAGCCTGGAAGGCCACCATGAGCAGCTGCACGCATGTCAGCTTCAC	chr4R	808746513	SECCE4Rv1G0278470.1	Peroxidase	0.011548184	0.055548299
PHT	100164722|F|0--33:G>A	TGCAGGGGAGTACAAGTCTGCCACAGGAAGACCGTACTCCCACGGCTGTCCTCCCTAAGGCTGAGCCAT	chr4R	827201534	SECCE4Rv1G0281690.1	F-box family protein			0.043971243	0.053572023
PHT	100038250|F|0--65:C>A	TGCAGGATGGTGCGCCTCAACACGCTGCATGTCGACGGGATCTCCGCCAGCAACGTGGAGGCCATCTAC	chr4R	829121099	SECCE4Rv1G0282550.1	Disease resistance protein RPM1			0.049057756	0.108855102
PHT	3593938|F|0--41:C>A	TGCAGGATCCTGGTCAAGAGCTTCTGCCTCAGAACCTTGTACGCGGCCTGTTCGAGGTAGGTGACGGGA	chr4R	829555479	SECCE4Rv1G0282580.1	Aspartic proteinase nepenthesin-1			0.049057756	0.038858447
PHT	100023197|F|0--8:T>C	TGCAGCTATCAAAGGTTCATCGACAAACAAATGCAAGAAATGCATCATGCCATTCATGAAGACGGCGCA	chr4R	832820035	SECCE4Rv1G0283080.1	F-box protein	0.043160781	0.049329124
PHT	3584836|F|0--22:G>A	TGCAGTCGTAGAAGAGAGCGCGGCCGTGACGGCAGTCGAGCATAAAGCACTCGCGGTGGTCGGTGGCGG	chr4R	847132197					0.049883133	0.038483892
PHT	100012059|F|0--30:C>T	TGCAGATTTATAGCTGGGCAGGTGCACACACAAAACTGGCCAACCTTCTAGTCTGGCGCGCCTGATCCG	chr4R	847360442			0.001392055	0.121801907	0.040265857	0.037009676
PHT	100085795|F|0--36:G>A	TGCAGGTGTGACTCACACCGTGTGAGGTTGTTGGGCGATGGTGGCGAGCAGGCAGAGTCCTTGCTCGCC	chr4R	852699170					0.044091456	0.158614918
PHT	100081664|F|0--41:G>T	TGCAGCGGATCCACGACAAGTGGCTCAAGACAGGCGAGTGCGCGGCGGACGAGAGCGAGCTCATCAACT	chr4R	854889800	SECCE4Rv1G0287470.1	Glutamate receptor	0.030949211	0.045535655
PHT	100164055|F|0--44:G>A	TGCAGCGACAGCGAGCGGCGGCTCGTGTCGGAGGCGCAGCAGAGGCGTCCATGGCGCCTGTCGGCTGGC	chr4R	865330953					0.042233378	0.072588844
PHT	100177201|F|0--5:C>T	TGCAGCTGTTGGTGATCTGTTGGATGTCCAAGCCGTAGGAACCGCATGTGAGCGCGTCGTGCGAGCTGG	chr4R	865452201					0.044091456	0.057601676
PHT	100046191|F|0--45:A>C	TGCAGGGGCCATTCTCCATGCGCATCACCAGCGACTCCGGGAAGAAGCTGGTGGCCAACAATGTCATCC	chr4R	875957888	SECCE4Rv1G0291160.1	Expansin protein	0.049198885	0.02403606
PHT	100011380|F|0--36:T>A	TGCAGCCATGGATATGATCCATGGAATTCAGAATGCTGCAACCACGGATATGCCACAAGGAATGCAGAA	chr4R	878771621	SECCE4Rv1G0291800.1	tRNA pseudouridine synthase B	0.031599473	0.027460271
PHT	100056274|F|0--17:A>G	TGCAGGGGCGACAAGCCATACTGCTACTGCTGCCTCATTGGGTATAATTGCTACGAGTCCATGGACGTG	chr4R	883160753					0.044091456	0.036802561
PHT	100120334|F|0--67:T>A	TGCAGGAACGCGACATTGGGCTTCACCGCCCTGTCGAGGTTGTGTTGGAGAAGATTGGAGTTGAACTTG	chr4R	884433816			0.045472289	0.043496294
PHT	3885887|F|0--20:G>A	TGCAGCGCAGGTCTGAGTTCGTCATCTCCGAGGTGGGGTTGGAACCTGGGTACATTGCTTATCGCCTGG	chr4R	885685733	SECCE4Rv1G0293350.1	Mitochondrial transcription termination factor-like			0.047772188	0.065142367
PHT	100018812|F|0--36:G>C	TGCAGATCGATGGTGAGCATCGGCGAGCTGCGCCGTGGACCATACAGCATGCTCCTCCTCCTCCTAACT	chr4R	889845803			0.044291482	0.034701784
PHT	100074147|F|0--31:G>C	TGCAGATGGCGGCGGTGTTTTGTCACCTCTAGGTATGCCATGACCACTTTGAAATGATGTCCGACTGCG	chr4R	895648898			0.046878023	0.049732461
PHT	100019121|F|0--31:C>T	TGCAGCACACGCACGGCCAGCCTCATGTCTGCATATCCAAAGAACACATTAGAACAGTAGGAACAAATG	chr4R	897485573			0.038834093	0.050304634
PHT	100076208|F|0--38:A>T	TGCAGACGACACCACAATGCACAGGGAGACCACCATCGACAGTTTCCCCCTCGCGTCGCGTGATGGCCT	chr4R	898726409	SECCE4Rv1G0295490.1	DNA helicase	0.002785875	0.055587982
PHT	100041095|F|0--44:A>C	TGCAGGTTGCGGCGGTGCTGTGACACGTCTAGATATGCCATGACAACTTGAAAATGCCAGCCAACGGCG	chr4R	898726711			0.015578844	0.042270967
PHT	3746548|F|0--37:G>A	TGCAGTGTCCAATGCTGACACGAAACAATTATGCTTCGTGGGCACTGAGGATGCGAGTGATCCTGCAAG	chr4R	901829278					0.047802064	0.163097931
PHT	100016863|F|0--11:C>T	TGCAGCCCGGCCAGGATCCGCTTGAGCTGCGCGGAGGTGGTGGAGGAGGCGGCCGCCGCCGCGGCGGAG	chr4R	902779100	SECCE4Rv1G0296360.1	E3 ubiquitin-protein ligase			0.049572303	0.067456128
PHT	3746747|F|0--39:A>T	TGCAGGCATACGGAATTCAAGTTATTCCTATCATATTAAACTTATACTAATGCACACACATGTAGCAGT	chr4R	902824490					0.048436843	0.047633144
PHT	100006421|F|0--5:C>A	TGCAGCAGAACTCTCAAAGAGGAAGTAAACGACAGCAACGTACCCGTCCAGCCTCTCCATTATCCCGTG	chr4R	902849040					0.046758176	0.015814473
PHT	3593410|F|0--64:A>G	TGCAGCCGAACACGACGCCGTTCACAGACGTGGTCCCGAAGTTGAACGTCTCCATGGCTAGGTTACCGA	chr4R	904262759	SECCE4Rv1G0296720.1	Aspartic proteinase nepenthesin-1			0.049571521	0.075456325
PHT	100049263|F|0--29:A>C	TGCAGCTCGGCGCGGAGCGCGCTGGCCATATTCTCCCCGTCGTCCAGCAGCACGATGTCCTCCACCGCG	chr5R	10775413	SECCE5Rv1G0298250.1	Zinc finger (C3HC4-type RING finger) family protein	0.046277663	0.042471316
PHT	100049661|F|0--37:G>C	TGCAGGCAACCAAGCCTCGACGTTATAGCGCATTTGCGGTCGCGGGGAATCTGGTGACATTTGTACTAG	chr5R	14583476			0.026400131	0.058015342
PHT	3746808|F|0--40:G>A	TGCAGATGTCGTGTTAGCTCATACGTGGCGTTTTAACACCGCTTCTGTTGTAGGCTGCCAATCTTTTCT	chr5R	27288776					0.040033647	0.094929039
PHT	100199037|F|0--28:C>T	TGCAGTGGATCCATGGACGGCAAGAGGGCCATGGCTGATCTCGTCCACTTCGTCTGCGCCTTCCGAGAT	chr5R	27348740	SECCE5Rv1G0300610.1	Transducin family protein / WD-40 repeat family protein			0.044091456	0.062641191
PHT	100050639|F|0--14:C>G	TGCAGTATCCTGCTCAGCGCCATCTTGGCTTCGACCAGCGCGAAGTTCTGGCCGACGCAGACCCGCGGG	chr5R	27762212	SECCE5Rv1G0300700.1	Cytochrome P450-like	0.022625156	0.046450726
PHT	3882372|F|0--26:G>A	TGCAGTTCTCCTTCCTTCTCCGATGCGACCAGCTGACGGACGCGGAGGCCGCCCAGGAGCGCACCCACT	chr5R	29184617	SECCE5Rv1G0301140.1	hydroxyproline-rich glycoprotein family protein			0.047382921	0.073579442
PHT	100051080|F|0--66:T>C	TGCAGCGGCAGGCAGTGATGGATGAAAGTGAGTACCACGCTGCTAGCGCTTTGCATGAGTCATGGGTCT	chr5R	31996220			0.043527394	0.037498366
PHT	100177421|F|0--26:A>G	TGCAGAGGGACGGCGGAGGGATGAGCATGAAGAAGCACGTGTCCAAACGTTACTCCCATGTCTGCGCCG	chr5R	33591132	SECCE5Rv1G0301700.1	DNA mismatch repair protein MutS 1			0.041601725	0.084289661
PHT	100075301|F|0--32:A>G	TGCAGCAGCCCAGCGGCACGAGGTAGGACGCCATCGGGTTCCACCCCTCGCCCTGCGCCACGTCCTCCC	chr5R	33591214	SECCE5Rv1G0301700.1	DNA mismatch repair protein MutS 1			0.021998075	0.049123902
PHT	3583423|F|0--35:G>A	TGCAGGTTCTTGGTCGCCAAGTTCTTCGAGACGAGGGAGAGGCAGCACTGCGATAACTTTGCGGTGCTG	chr5R	33591217	SECCE5Rv1G0301700.1	DNA mismatch repair protein MutS 1			0.042143874	0.073783473
PHT	100073178|F|0--8:G>C	TGCAGTGGGGGGCAATTCTTAACACTCGCCACTCGTAAACTCTTTCAAAATTGCCCGCGGGATGAAAAT	chr5R	35880771					0.03929873	0.050978415
PHT	100006573|F|0--21:C>G	TGCAGTCGGGCAAAAGGGCAGCGGCAAAACGAATGGAATTCAAGGAAGCCCTGCTACAGCATGCATGCA	chr5R	38561852			0.030387891	0.048435005
PHT	100074508|F|0--25:T>A	TGCAGCACCGAGGACAAGACATGCCTTTACAGGGTACCGTACATGGACTGGTCGGCGAGCGAAGGTAGC	chr5R	39242065			0.014596402	0.03084317	0.043759819	0.017131595
PHT	3597579|F|0--34:C>T	TGCAGAACCTCCACATCACCTCCCACGAAGAGGACCCAGGGCCCGTTGCAGTTTCCAAAGGCGACCAGG	chr5R	44299966	SECCE5Rv1G0303030.1	Programmed cell death protein 2			0.018555666	0.122108133
PHT	5211970|F|0--21:G>C	TGCAGCCTGGAGAGGGGAGTGGAGGGAGAGACCACACGAGAGGGAAAGAGCCCTAACCGATTTTGTTGC	chr5R	45198303					0.02257989	0.098911956
PHT	3895532|F|0--43:C>T	TGCAGACAATCCATAGGCAGATGTTAAGTGATCTCGGAGCAGCCGTGGCGGTTGCAGGCGATGGCTCCG	chr5R	48966718					0.032982999	0.103180277
PHT	100123245|F|0--26:C>A	TGCAGAAGCATGGTGTCGTCCACCAACAGCACGCGCATCCCCTCCAGCGGCTTGCCGTCTCCAACATTG	chr5R	48966721	SECCE4Rv1G0257440.1	Histidine kinase			0.037547662	0.061395178
PHT	100059610|F|0--67:G>T	TGCAGCACAACAGACCCCCAAGGGGCGAGCCACATCAGCTTCAATCACGAGGCCACGCGCGGCGGACGG	chr5R	49044940			0.035207771	0.029741191
PHT	100042890|F|0--34:A>T	TGCAGGGAAGGTTGGTTGTAAAGGAAGATGCTCCATAGCGGTGAAGGATTGCAGATTCTCCGCCCACGG	chr5R	49231475			0.038217359	0.060774424
PHT	3731440|F|0--44:C>G	TGCAGCGGTGTCGCCCACAGATGCAAGTGCAACGGCGGTGAGAACGAGGACGGCAAGACGGGAAGCCAT	chr5R	52131078	SECCE5Rv1G0303930.1	Kinase, putative			0.034393953	0.069355945
PHT	3360491|F|0--12:G>A	TGCAGCGTCGCCGTGAAGGACGGGGACATCGACGCCTTCGTCGCCAGGAGCCCCGCTCTGGAGATCCTC	chr5R	52691252	SECCE5Rv1G0303970.1	FBD-associated F-box protein			0.04476766	0.096485973
PHT	100186886|F|0--5:T>C	TGCAGTCAACGCGCGGTAGCTGTGGTGGCGCGTCTTGCGGATGTAGCGGCGCTTCGCCGTGGAGTAGAC	chr5R	53417921					0.03363014	0.079406878
PHT	100020086|F|0--18:T>C	TGCAGGCTCCTGTCTTCGTCCTCTGCCCCGGAGCCGCCGCCGCCGCCGCAGACGGTGGAGAAGGTGCTG	chr5R	55081109	SECCE5Rv1G0304240.1	Acetyl-CoA carboxylase, putative			0.042355758	0.109223186
PHT	100018362|F|0--43:G>T	TGCAGAATCTTCTAAACAAAGTCGCAACTGATCAGCAGCAGCCGCAACAACAAGGGCAGCAGCACCGCC	chr5R	59010777	SECCE5Rv1G0304440.1	Protein ROOT HAIR DEFECTIVE 3 homolog	0.004312968	0.068016505
PHT	3364528|F|0--58:T>C	TGCAGAAGGACGGCGGCATGCAGTTTGAGCTCACCACCGAGATCATCAGCACCGTCATTTTCGTAAGAT	chr5R	61521675	SECCE5Rv1G0304730.1	Cytochrome P450, putative			0.045601419	0.062504116
PHT	100048463|F|0--67:C>A	TGCAGGCTTGTATTGGGAATGCCATCCGCTTCCAGCGTGCGGTTGACCGGGCTGCCATCACAATAATCT	chr5R	124613705			0.022625156	0.024553763
PHT	100019995|F|0--48:G>T	TGCAGGAGCTGGAGCGAGTTTTGAAAACAATTCCATGTTTCTAAAAATGTCAAGACATCCCATGAATTT	chr5R	193080090					0.045256848	0.036743358
PHT	100022045|F|0--27:T>A	TGCAGTCTACACTGCGATCGTCATTTTTGGACGATCCGATATGCCATCACTGTCCTGCGCGCGTCATGT	chr5R	224889761					0.049057756	0.053880347
PHT	100038242|F|0--24:G>T	TGCAGGTTTGCATCTTCGAGGTTTGATTATTAGAATAAAAATTGGTTCTGGTGCAGCTAAGAAGATGTT	chr5R	369786529					0.046398949	0.034052362
PHT	3365382|F|0--5:A>C	TGCAGAGACGGCTGCGAAGGCGCCCCGCCGCTGACGCACGGTGGGCTAATAGCGGGCGACGACTGCAAC	chr5R	371789617	SECCE5Rv1G0319210.1	Lipid transfer protein			0.049572303	0.094169234
PHT	100008160|F|0--43:A>C	TGCAGATCATGGCCCTGCACTCCTCCAGCCCCATCTTCTCGGAACCCAGCAGCTTGCCCAGCATCCGCC	chr5R	379776388	SECCE5Rv1G0319900.1	Calcium-binding protein			0.044377285	0.050630731
PHT	100045975|F|0--56:T>C	TGCAGCAGAAAAATCGCTGATAAAATGAGAAGGACGTCGCTGCTTTATGTGGGCCATGCAGCCACATAT	chr5R	397331558			0.037082805	0.030156798
PHT	100044467|F|0--5:A>G	TGCAGACGAATTGACCTGCTGTGGAATTGCATTTATTTTTGTCGTCATCATGGTGGCCGGAGCACCAGG	chr5R	404309991	SECCE5Rv1G0321480.1	FCA protein			0.041286533	0.06648561
PHT	100059355|F|0--42:T>G	TGCAGGTCACACAACGCGTTTAGTGCTTTCTGTTGATGGTTTTGGAGTACTCTAGCCCGAAATCTGGTG	chr5R	438189552					0.046549417	0.042032722
PHT	100036995|F|0--52:G>T	TGCAGTTCACCAACATGAACTCTATGCGCAACCTCTTCATTGTTGGGTTTTCGCTCTTTCTTGGCTTAT	chr5R	438910138	SECCE5Rv1G0323670.1	Nucleobase-ascorbate transporter-like protein	0.046239681	0.022371221
PHT	100020060|F|0--65:G>T	TGCAGACCGAGCAGGCATGTGCCCAATACATACTGTATTTGGTAACGTGCCAGGTACAGTATACAGATT	chr5R	439556765			0.034707763	0.029607311
PHT	3362686|F|0--45:A>G	TGCAGAGGCCTGCAAGCACCACCAATGCAAGCAAAGACACGGTATACAGTACTGGTGTACACGGTTTCA	chr5R	440655327					0.047190518	0.056613505
PHT	3744465|F|0--53:T>C	TGCAGCGTCGTCTGGCGCGCGCTCCGCGACTCCGGCCCCGACGCCGACAACCCTTGGAACGGCTGCGCG	chr5R	448093524	SECCE5Rv1G0324570.1	3-ketoacyl-CoA synthase			0.036212573	0.106646194
PHT	100011021|F|0--53:C>T	TGCAGCTTCCTACATAGCTCCGCCAGTGCTTATGAGGTAGCACAAATTGTTGACCACTTTGACTAGGCA	chr5R	461217978					0.036537255	0.127537588
PHT	5138822|F|0--17:G>C	TGCAGAGCCTCCACCGTGACCGCGGACCCGCGCGACCTGGCCTCGACGGCAGCCGCTGTGGCCTCCTCC	chr5R	466577210	SECCE5Rv1G0325510.1	Trichome birefringence-like protein			0.02172327	0.101724934
PHT	100066370|F|0--45:G>A	TGCAGGGAGCGGCGAATAGGGATTTCCTGTTAGGAGGTCTCGACCGAGATACTGCCGCTTGTGCGCTCC	chr5R	468891142					0.018318709	0.085980991
PHT	100060696|F|0--65:G>C	TGCAGGATCTGGGCGGAAAGGCAGCGCGTCCACACGACACACACGGAGCACGGGCACGGGCACGGGCAT	chr5R	470452246			0.042275675	0.024585249	0.034393953	0.06906893
PHT	5206791|F|0--53:C>T	TGCAGCATTGCTGGCTAGCAGGGCGGCCTGCTGCTCCATGGCCGGGGTGGTCACGAACGTGGTGAAACG	chr5R	471531156					0.046549417	0.06822782
PHT	100031214|F|0--8:C>T	TGCAGGCCCGCACTACACCGTGGAGCCCACCAGCCATCACGTATGTGTATCAATGTATCATCCTTTACT	chr5R	473897763					0.041397392	0.058232733
PHT	3601128|F|0--8:T>C	TGCAGGCCTGCACTACACCGTGGAGCCCACCAGCCATCACGTATGTGTATCAATGTATCATCCTTTACT	chr5R	473897763					0.04705914	0.042452848
PHT	100006484|F|0--19:C>G	TGCAGCAATTTGTTGGCGTCCATGCATCCACCGCGGCGAAGGCCCGCGCAAACATCTCAACTCCCATCT	chr5R	474639072					0.048946813	0.018940066
PHT	3746332|F|0--6:T>G	TGCAGCTGGTGCAGCCGTTTCCGTGGGCACGGCGACGGGGCGGCCCCTCCTGGCCCCGTTTCCGCTGCG	chr5R	477102308	SECCE5Rv1G0326320.1	Transcription factor jumonji (JmjC) domain protein			0.049245452	0.03836625
PHT	3581286|F|0--44:C>T	TGCAGAATACATGCAGCGCCATCGGTCGCCCGCGTCTTTTCCCGCGCGTCGGTTTTGGCCTTGACCAGG	chr5R	477564885					0.034393953	0.11136851
PHT	100009850|F|0--39:G>A	TGCAGAGTTCAGCGCGTGAAGCCACCAACAGAGTCCTCCGCATCTCCCCTGATCCTGCACTCGGCAATG	chr5R	478011760	SECCE5Rv1G0326360.1	Type I inositol-1,4,5-trisphosphate 5-phosphatase	0.024286916	0.029654443
PHT	100036416|F|0--47:A>C	TGCAGATCTCGGGCTGGTTATGACCAAAGAGGAGGGCAAGCAACACGACCAAGCGGCCCATTCTGCTAG	chr5R	478361010					0.037353051	0.026843492
PHT	3906784|F|0--16:T>G	TGCAGATAGGAACATGTCATACCATGGATGCACAATACTTGCCCAGTATATATATAAATATAGTTAGCT	chr5R	478958187					0.021652583	0.147709217
PHT	100010147|F|0--19:G>A	TGCAGGGATTTAATTAAAGGAGAAAGAAAGAAACATGCGCAAAAGGGATCGTTGATCAAATCATTCCGT	chr5R	478959287					0.037848352	0.022699971
PHT	3602982|F|0--37:T>G	TGCAGGCCTCCGACAGGATCTGGGTGTTGAGCGTCACTCCAGGGTTCGGGTGCCAGTGCATCAGCCTGC	chr5R	489030157					0.043132849	0.04994985
PHT	3906459|F|0--26:T>C	TGCAGCAGGGCTTTTGCTTCATCAAATTCGACACTGTTTGCAATTGATCGCTCCTACTACCTAGTGTTT	chr5R	491842068					0.041397392	0.06980678
PHT	3362555|F|0--62:A>G	TGCAGAATTCCAATATCGATCACCCCTCCAAATTTCAGCTCGATCTGACCGTTCAAACTTCGATAAAAG	chr5R	494771614					0.044377285	0.07043341
PHT	100075015|F|0--40:G>C	TGCAGAAGTGGGGCTTCATGGAGGAGTTCTCCTGGTACACGGCCGGCGAGCGCGAGTACTTCGCGGACC	chr5R	495622279	SECCE5Rv1G0327710.1	Chlorophyll a-b binding protein, chloroplastic			0.03363014	0.128477206
PHT	3363821|F|0--46:A>T	TGCAGCATCGCATGGTTCGGTCCAGTTGCAGTCCCACCCACGAAAAAGGTTCCCCCCCTCGTGCACGAT	chr5R	495817432					0.033345266	0.15515359
PHT	3349205|F|0--16:T>C	TGCAGTTGAGCTTGATTTCTTCTCCGTAGTCTGAGGACTGCGAGTAGCAGCATCTTCTCCAGCAACTTT	chr5R	496167888	SECCE5Rv1G0327740.1	DNA cross-link repair 1A protein			0.0200629	0.115004479
PHT	3745632|F|0--44:T>C	TGCAGGCTGTGCCGTCGCCTTCCGTTGACGTGCCACGGCCCGCATGTGCCGAGCCGGTGGAGCCGAGAT	chr5R	497580993	SECCE5Rv1G0327830.1	Flavin-containing monooxygenase			0.049057756	0.063489581
PHT	3364151|F|0--56:A>G	TGCAGCTACCTGCTGGAGCTCCTGGCGCAGGAGGGATTCCTCGTGGTGTGCGTCCCATACAACGTCACC	chr5R	498978250	SECCE5Rv1G0327950.1	Initiation factor 4F subunit (DUF1350)			0.044890652	0.045931549
PHT	5208591|F|0--64:C>G	TGCAGTCGCCCAAGTTCAAGGAGATGATCGAGCGGACGTCGGCCGCCGAGAGCAGCACCACCACCTCGT	chr5R	511466977	SECCE5Rv1G0328990.1	Ap2-like ethylene-responsive transcription factor			0.041506314	0.055124146
PHT	100164193|F|0--62:C>T	TGCAGCGTCACGCTGTACCAGAACTCGCACCTGTCCAACGGGTTCGACCCGTCGGTCCGCCTCGACGGC	chr5R	515135163	SECCE5Rv1G0329310.1	Phospholipase D			0.0200629	0.16531707
PHT	100123077|F|0--38:C>T	TGCAGCTTCTGGTTGGACATCTTGTAAGGCTGCTTCCGCGGGTTCACCTCGTCAGAGCACCTGAGCACA	chr5R	516321902	SECCE5Rv1G0329470.1	Cinnamoyl-CoA reductase			0.044377285	0.046660135
PHT	3580924|F|0--28:T>C	TGCAGGAGAGGAGAGGGACTAGGAGAATTCACGGAGCAGGAGATTTGCAGTGATCCAAACGTGTGATCC	chr5R	519427817					0.049048359	0.043946822
PHT	3596273|F|0--23:C>A	TGCAGGCGCCACCCCAGGCGCTCCGACAGCTCCTGCATCCGCTGCTTCTGCTCCGCGGTGAACTTGGTG	chr5R	520798499	SECCE5Rv1G0329720.1	Zinc-finger homeodomain 1			0.043807923	0.075586766
PHT	100076284|F|0--14:T>C	TGCAGCAAGTCCGCTTCCTCCAGGGATTCCATGGCCTTGAGCACCTTAGCCTTGTAGCTCCGCAGGCTG	chr5R	522030266	SECCE5Rv1G0329800.1	DUF1666 family protein			0.036408367	0.086813914
PHT	100019355|F|0--36:C>G	TGCAGATTTTCTCCAGCTCAGAGGGCCCCAACAGTCCGCGAACTCTCTGAAGGCCTTGTCACCAACGGC	chr5R	522032691	SECCE5Rv1G0329800.1	DUF1666 family protein			0.049668644	0.045009136
PHT	100040629|F|0--11:C>T	TGCAGCGTGTGCTCCAGGGCCGTCTCCAGAAGGTGCCATGTCATGGAGCGCGTCGTCGAATCCATCGTC	chr5R	522466655	SECCE5Rv1G0329870.1	E3 ubiquitin-protein ligase			0.041967837	0.023739466
PHT	100106947|F|0--47:A>G	TGCAGCGCCGCGGCAAGAGCGGCCAACGCCCTTGACTCTTGCCGGGCATGACGACATGGCGGTGGCGTG	chr5R	526367670	SECCE5Rv1G0330190.1	Zinc finger protein-like			0.048946813	0.04854009
PHT	3346935|F|0--66:A>G	TGCAGAATTCTATGGATCTTCCTCGAAATATCACTGGGAATACTGGTGATCTTCAAGAACCTGTGGATC	chr5R	526702849	SECCE5Rv1G0330220.1	Kinase-like			0.035225644	0.068576319
PHT	100004577|F|0--42:T>A	TGCAGATGGCATCCATCCATGTTACCTGTGCAAAACCACTAGTGTTTGATTACGGACACGGCTCTGACT	chr5R	527752231					0.049057756	0.013780752
PHT	100053099|F|0--35:C>G	TGCAGGATGTCGCGGGCGCCAGACGCGGACGAGGCCACGATGGCAGTGGTCGTACCGAGCTTCAAGGAC	chr5R	527762718	SECCE5Rv1G0330340.1	Cytochrome P450 family protein, expressed			0.049057756	0.013780752
PHT	100029610|F|0--58:T>C	TGCAGTGCATTATGGGGGAACACTGGTACGCGCCGTGCGATTAGTGCAATGCATGCAGTGCACGTACGT	chr5R	528623165					0.02257989	0.091655549
PHT	100021131|F|0--14:C>T	TGCAGATTCCCAATCTCTTCTGGGATCTGGGTTATGGATGTATTGCACAGCCGTAAATACCTCAAGTGA	chr5R	536251138	SECCE5Rv1G0331100.1	Disease resistance protein (TIR-NBS-LRR class) family			0.044091456	0.029234798
PHT	3589888|F|0--25:G>C	TGCAGCTGTCCCCGAGCTTGCGCAGGACGTCCATCACCTCCTCCGCGGTGATCCTGCCGTCCCTGTCCC	chr5R	536712863	SECCE5Rv1G0331180.1	Calcium-binding protein			0.039253365	0.059065608
PHT	100011963|F|0--19:C>G	TGCAGAGCGCCATCCAGGCCGCCATCGCGCACTGCAAGAACTCCATCGCCGTGGCCAAGCAGTAGTGCG	chr5R	537479957	SECCE5Rv1G0331270.1	Bri1 kinase inhibitor 1	0.037580312	0.050600907
PHT	100025965|F|0--33:G>A	TGCAGTACTCCTTGGCTTGTCAAAAATGTTCACGCCCACATGGGCATGTTTAATGCTTTAATCGACTGC	chr5R	539108023			0.027955153	0.022444375	0.02172327	0.035562803
PHT	100013162|F|0--57:G>C	TGCAGATCGATTCCAACAATCAGCACGCTCACGGGATCACAGTAGACAGCAGTACTAGCACATTTCATT	chr5R	539111318					0.042355758	0.036791534
PHT	100053352|F|0--48:C>G	TGCAGCAGACCTGCATGGGCACCACGCTATGGCGAACGAAGCCGCTGCCCACGTGGAAATCAATGAGCC	chr5R	539113487					0.039375083	0.047688284
PHT	100051377|F|0--19:C>G	TGCAGTGGGTAGTAGCGCACAAGGCAGGCGCGGGCAGCAGTACAAATGATTGGGTCACTGTGCGGAAAG	chr5R	540346210			0.046239681	0.050083503
PHT	100041174|F|0--63:A>G	TGCAGCTCCACGCCAATGCCTCTCAGGAGGCCCAGCTGAGAGAGTTCATCTCGTCCAGGAGGAACAGCG	chr5R	540822974	SECCE5Rv1G0331710.1	Carboxypeptidase	0.032621104	0.023289855	0.046398949	0.044850318
PHT	100072614|F|0--61:A>C	TGCAGGCATTCCTGGAGCAAGGGATACCTACCACGCCCCATATGCTCGTGGCAATGATGCCAAAGGTAC	chr5R	541393725			0.046878023	0.022213207	0.043631271	0.0259065
PHT	3358564|F|0--44:A>G	TGCAGCAAGAAGGAGCTAGCGAGACGAGATGCCGTCCGACGATCAAGAGCAAACACGCAAGCAGGCGCG	chr5R	541528447					0.042511125	0.050509054
PHT	100002643|F|0--46:A>G	TGCAGCTCATATACCATGTCGCCTCTTTCCCGCGTGACGTGCATCTATTTTGTGATGGATGGACGCCGC	chr5R	541730923					0.031428943	0.081133244
PHT	100014878|F|0--26:C>T	TGCAGAGGCATGTGTGCAGGGGCATACGCCAGGGATTGAACGCGACGCTGTAGCCTGTAGGGGAGGTGG	chr5R	545106179					0.045332813	0.088121195
PHT	3579634|F|0--5:C>A	TGCAGCGGCAGCAGCGGAAAAAGGCGGGCCGCTTCGATTGGTCGGGGATCAGAAAGGCAGGCCAGGCCG	chr5R	545999207					0.03333058	0.099073866
PHT	3362763|F|0--31:T>C	TGCAGAGGAGCTTCGACCACTTCGCCTACTTTGCACTGGTGCTCTTCATGACCATGATGCTGGTGGAGG	chr5R	547021970	SECCE5Rv1G0332330.1	ABC transporter G family member			0.049237072	0.053548573
PHT	100019986|F|0--21:A>G	TGCAGTTGGCAAGCTGTCATCAAATCAAGTGTCCAAGCCTGCGTGAGCATGTGAATACAAAACGGAAAG	chr5R	548128458					0.036408367	0.048937536
PHT	100070706|F|0--62:C>G	TGCAGGATATCTCGTCTCATGATGTAATGCGAGGGGTTTGTGTTGGCTAGAATTTGTTCCGTCACTTGT	chr5R	548262048					0.01230861	0.158470311
PHT	100047990|F|0--11:T>C	TGCAGGATCGGTGCAGAAGCGTCACGCCGTGTTCTTCCCTTTCCCGGCGCAGGGCCACGTCAAGCCGAG	chr5R	550628629	SECCE5Rv1G0332660.1	UDP-glycosyltransferase	0.049848131	0.026105508
PHT	3745476|F|0--68:G>A	TGCAGCTTCTTGAGCCTCCCGATGCTCGCCGGGATGGTGCCGCTGAGCTCGTTGTCGTAGAGCGTGACG	chr5R	553060140	SECCE5Rv1G0332930.1	Receptor protein kinase, putative			0.044057701	0.057084156
PHT	100063344|F|0--9:C>T	TGCAGGCTTCTTCTCTCTGGCGGCGAGCTTTCTTCCTCGGAGAATCGCAGTCGAGCGGATCTCGTCAGC	chr5R	554600953					0.018555666	0.057287235
PHT	3347145|F|0--29:C>A	TGCAGCCTGTCCAGCACGTTCTCCACGCCCACGTCCTCCCGCAGGCTCTCCTCGCAGGCCTTCTTCAGG	chr5R	554601149					0.048337631	0.102901885
PHT	3363395|F|0--64:G>A	TGCAGCATCATGCACCATTCACGACTGGATCAGTGCCGATCTTGGCAAGAGTTGTTGCGAGCAAGGATC	chr5R	555518547					0.045477672	0.046128639
PHT	100181338|F|0--41:C>T	TGCAGTCGCCCTACATCTCCCCTCGGATCGCCGAGCCTCCTCCCCCTCCTAATCCTCCGCCGCCGAGAT	chr5R	556274854	SECCE5Rv1G0333350.1	Disease resistance protein			0.041397392	0.076102375
PHT	5046584|F|0--18:G>C	TGCAGCCGCCGGCACTTGGCCCAGTCCATGAGCTTCTCGCCGTCGCCCTTGCCGCTCGGGATTATGAAG	chr5R	561893668	SECCE5Rv1G0333810.1	Tonoplast dicarboxylate transporter			0.049668644	0.038043213
PHT	100054245|F|0--65:T>G	TGCAGTTGCACCACAAACAGCAGCACGCGGGACGGCGGCTCTTCGCGGACCTGAACTCCAAGGCGTCCG	chr5R	562097219	SECCE5Rv1G0333820.1	Zinc finger protein			0.036271447	0.042428359
PHT	100032647|F|0--50:C>G	TGCAGCTAAAGAAGAGATTATTTTTCCTGGGGAACTGTGGCTTTTGTTTTCTTCTTATCCCTCTCTCAC	chr5R	566421083			0.014204298	0.049024453	0.02257989	0.126222453
PHT	100038317|F|0--25:C>A	TGCAGGAGCAGCAGCCTTGTTACACCATGCGGTAAAGCCAGCCAGGTTCTGATGCTTGTGTGAGGGACA	chr5R	568484424			0.045153918	0.060580615
PHT	100183353|F|0--11:C>G	TGCAGCTGGTGCTGGTGCCACTGCCGCTGCTGGAGGCGACTCCTTCGGCGCCTCGGTAACGACGGCCGA	chr5R	568501574	SECCE5Rv1G0334870.1	NAD(P)-binding Rossmann-fold superfamily protein			0.041397392	0.054117243
PHT	100072099|F|0--62:G>T	TGCAGCAGCGTCGGTCAGCGATGCGGCCTACCTCAGCGCCTCCACGCTCCTCGTTGGGGGATGTCGATC	chr5R	569256776	SECCE5Rv1G0334990.1	BTB/POZ domain-containing protein			0.018921176	0.040015184
PHT	3906051|F|0--28:A>G	TGCAGAAGGCGACCTTCGCCAAGAAGAGACTGGCGCCGCTGATGCTGGCGCCCAAGCGGGAGGAGATGG	chr5R	581984642	SECCE5Rv1G0336080.1	Alcohol dehydrogenase			0.03163267	0.118681996
PHT	3743514|F|0--29:T>C	TGCAGCGCCTTGTTCCATTTCCGTCAGAGTGACTGAAATGACAAACTGTTTTCTTCTTCTTTACTCCCA	chr5R	583139513					0.049057756	0.03963238
PHT	100014190|F|0--30:A>G	TGCAGGAATTAATCAATGGATCAGTAGGGGAGATAATCAAGGGAAGAACCATAGTACATCACGCACACA	chr5R	584051029			0.038852355	0.036590906
PHT	100069574|F|0--13:G>T	TGCAGGTGACCCCGTCGGTGCTGGCCGCGGGGCTGGCCGCCGACAACGTCATCTGCGCGCTCTACTTCA	chr5R	588452050	SECCE5Rv1G0337010.1	keratin-associated protein, putative (DUF819)			0.024526689	0.080089334
PHT	100058965|F|0--45:A>C	TGCAGCCAGAGGCCGCCAACAACAAGAGAGAAGCCACCAGCAGTGAACCAGCGGGAGAGACGGAGCTAG	chr5R	597269657					0.026923474	0.055251032
PHT	100080701|F|0--20:C>T	TGCAGGGGATATATGCCACCCGAATAATTGATCCGAGGCGTAGTCTCCATCAAGACACATGTATTCAGA	chr5R	604250675					0.045477672	0.066299968
PHT	100015401|F|0--12:T>C	TGCAGCCATGAATTGAGGAAGGTAGCATCGCCGTACGTGGGACTCAGACCCTAATTTCTGCGTTTTTCT	chr5R	609652202			0.043469229	0.035874374
PHT	100027891|F|0--65:C>T	TGCAGGCAAACACAAAGTTGACCCTACATAGAGCATCACACGGAATAATTTGACCAAGAAACTAACGAG	chr5R	611154288			0.046878023	0.029981084	0.049888442	0.024927351
PHT	3906824|F|0--46:T>C	TGCAGGGTCTGACATGGCAACAATTATGAAATGACGTATCAATTTCTTTGTAAAAATCACATTTTATCA	chr5R	619231523					0.042493796	0.052609015
PHT	100046870|F|0--8:G>C	TGCAGCACGGTGTGCGTGCCGATGAACCCCGCGCCGCCCGTCACCAGCACGCTCTTCCCCTGCGCCTCG	chr5R	619470396	SECCE5Rv1G0340920.1	UDP-glucose 4-epimerase	0.042275675	0.019820073
PHT	3364553|F|0--11:G>A	TGCAGTCAGTTGGGCTGGGCTCATAACGTTCGTGGTGCGCGGAGACCATCGCCAAAGGCCGAGCCACAC	chr5R	620722487					0.044377285	0.049861148
PHT	3907216|F|0--47:A>C	TGCAGGACGCAGGCCGCGATGGCGTAGAGCAGCAGGTCGTCGGTCGGAGGAGCATGCAGCCTTATTTTC	chr5R	620992499	SECCE5Rv1G0341130.1	GTPase-activating protein GYP7			0.039193498	0.118733306
PHT	100016106|F|0--53:C>A	TGCAGGATCATCCACAGCAGCAGCGCCCTCCTCATTCGACTGCAACCCAGCGCCCGCGCCCTCCTCGGG	chr5R	623234367	SECCE5Rv1G0341330.1	Zinc finger CCCH domain protein			0.013786461	0.074359462
PHT	100010806|F|0--6:T>C	TGCAGCTGATGTTGCGAGGGAAAAGGTCAGGGAAGGGGCGCAGCACAACAGTGGCGCAATAGAATAAGC	chr5R	624590230					0.039749357	0.053800711
PHT	3362530|F|0--21:C>T	TGCAGCAACATCCTTCTTCAGCCTGGTGGAACACTCATGCATGGTATGCTCAGGTTGCCACGCAAATGG	chr5R	626595776					0.049057756	0.039775216
PHT	100007917|F|0--20:A>T	TGCAGGTGTCTTTTATAGACACGAAGTACACATTGCTAAACAAAAGGCAACACCCAGTGTCGTAGGCAC	chr5R	629398632					0.044346559	0.035819253
PHT	3363318|F|0--13:C>T	TGCAGTACGACTCCTGTCACAGTGACGTTGTTGTATTACACAATTTTGATGGAAGCAATGCTTACTGTG	chr5R	632817206					0.048285418	0.092729295
PHT	3345601|F|0--24:T>A	TGCAGTAGGGGGTTAGCTTTCTGCTAGCCAATTTGTGCTTGATCGATCCTTGCGTGTAGTTGCCGCCAA	chr5R	634820535					0.049883133	0.057406266
PHT	4490583|F|0--50:C>G	TGCAGGCCGGCGATGTAGCGGGTGATGTACTCGACGGTGACGGGGTCCTCCACGGTGAGGCGGTGGCTC	chr5R	635146692	SECCE5Rv1G0343090.1	Proteasome subunit alpha type			0.036408367	0.093370696
PHT	3594457|F|0--26:G>A	TGCAGCGCCTTGCCGAGGAGGAGCTCGTTGGTGTGCGGGCCATAGATGTTGGAGGAGTCGAGGAGGGTG	chr5R	637850664	SECCE5Rv1G0343370.1	Aldo/keto reductase family oxidoreductase			0.033345266	0.14530125
PHT	100040405|F|0--18:A>C	TGCAGTCAGAACATACACAGAGCAAACATTTTTTGCTGGAAATCGGACTCACAGACAAGTGCAACGCAC	chr5R	640707299					0.040275568	0.081211266
PHT	3745707|F|0--19:C>T	TGCAGGACGGGGAAGAGCTCGGCGACCTCGTGCTGCGAGGACCTCGCCGTGGAGGAGGAGGAGCGGGTC	chr5R	640716146	SECCE5Rv1G0343740.1	ATP binding microtubule motor family protein			0.042233378	0.051626887
PHT	3901355|F|0--25:G>A	TGCAGTTCTGGTCATGCCGTCAAGTGAAGTGAAACATGAACCGTGGGCGAAGTCGACAAAAGAGGACGC	chr5R	641246423					0.049048359	0.064639988
PHT	3745853|F|0--67:T>G	TGCAGGTGCGACGAAGCTCTTTTTACCACATATGGTCTGTTTTCCGTTCTGCGCTTGCGACGATGATTT	chr5R	641524242					0.049572303	0.079841591
PHT	3597189|F|0--65:T>C	TGCAGCACGACGGGCGACGGCTTTGGCGGCGCGAACTCGACCAGTGTGGCCCCGTCCACACGCGCTTCG	chr5R	644965109	SECCE5Rv1G0344360.1	Agmatine coumaroyltransferase-2			0.048752316	0.064880057
PHT	100025841|F|0--23:G>A	TGCAGTTCTGCAACATGCCACTCGGCGGTGGCTTGAGCATGGCCTGGTTCATTAGGGCATCCTGCTTTA	chr5R	649913522			0.033447774	0.020338683
PHT	3909132|F|0--42:C>G	TGCAGCGGCGAGCGCCTTCCTGAGGAGCGTGATGGGGAAGCTCTTCCAGGTGCTGGAGAAGGAGTACAA	chr5R	657763967	SECCE5Rv1G0345660.1	Disease resistance protein (NBS-LRR class) family			0.049225879	0.039935057
PHT	100004216|F|0--53:C>A	TGCAGTTGGTCCTCAGCTAATGGTCATGTCCCTTGCCAACTTGTCACAGATTACCAGCACCTAAACCAC	chr5R	659422518			0.006141247	0.08581541
PHT	3344461|F|0--23:G>C	TGCAGCTGTAAGTGCAAAGTACAGGTCCAAAAGCATTGAAGCATACTCTGCATCTACTCTGTAAAGGCT	chr5R	660505120					0.048919181	0.075121703
PHT	100046422|F|0--29:A>C	TGCAGCCCCCCTTGGCTCTTCACTGCATCATGTCCTGCTCCTGCGCGCATTGCATGCTGCCGCGGCGGC	chr5R	661652207					0.049237072	0.035638035
PHT	100028062|F|0--60:C>T	TGCAGAATGTATATATTCTTGTATTGAATAATTTCCACAAGTGTAGGCTCATTTAGCGAACTCTGTGTG	chr5R	663001494					0.038443114	0.031180546
PHT	3748566|F|0--66:A>G	TGCAGGCGCGTGGACGCCAGCGCGCGCGCCCACACGCCGCCGATGGCGTCCGAGGACTCGAAGACGACC	chr5R	663215311	SECCE5Rv1G0346700.1	Flavin-containing monooxygenase			0.049057756	0.074247416
PHT	100040465|F|0--31:C>G	TGCAGTGAAGAGTTGCAGGAAAGCTAGAGATCTCACCGTTTATGTTTGCGCACTCTGCGGCGATGTCGA	chr5R	663216396					0.037848811	0.065299492
PHT	100016526|F|0--53:G>A	TGCAGGCGCAGAGCAAGAACGTGATCATCACCTACCTCGCGTTCGTCTCCCTCGGCGTCCATCTCTTCC	chr5R	663681741	SECCE5Rv1G0346770.1	Protein DETOXIFICATION	0.020738577	0.025598964
PHT	3745560|F|0--43:T>C	TGCAGCCCTTGCCCCATCTTGAATGCGCAGAGACGTCAACGGCTGAGGCTGCTTACCCGAGTCGATGCT	chr5R	663947168					0.036212573	0.121930551
PHT	100050658|F|0--23:G>C	TGCAGGCTGAAGCGCGCGTGCTTGGCTCCCTCCTGCCAAGAGGAGCCAGGTTATGGACGGATCATGGTT	chr5R	664212539			0.041151642	0.029389142
PHT	100042509|F|0--38:C>A	TGCAGTCCAGTCCATCAGAGCCATCAGATCAGAGGGAGCTCAACACGACACTGGACAGGGGGACACGAG	chr5R	682467494			0.007979084	0.091707553
PHT	100048790|F|0--48:C>T	TGCAGATGCAGAGACCGAGAACGGCAGTGGACGCGGAGCGCCAGTGGTCGGCGAGAACGGGCATCCCTG	chr5R	682981063					0.025656241	0.092679074
PHT	100020847|F|0--14:G>A	TGCAGCTAAATGCAGTAGAGCAGAACCACCTAGTATTTGGACACCACTTCCACATTTCGACCTGTCCCT	chr5R	683757778			0.018218714	0.04886392
PHT	100136999|F|0--33:A>G	TGCAGACTGGACATGGAAGCACGGCGACCGCAGATCGTGTCAAGAAAAGGCGGCCGGCGTCTCCCAAAC	chr5R	683883813					0.041097215	0.087306004
PHT	100014296|F|0--6:C>T	TGCAGCCTCTCGGGCAAGGTCTCCATCCCCATGTGCGACAGCAGGAGCCAAATATATGTGAGCAGCTCC	chr5R	685789658			0.020738577	0.082678834
PHT	5042178|F|0--37:G>T	TGCAGCCGGCGGATCATGGTGTCGTCGGCGCGGAGCCGCCTGGACGCGGAGGCAAACTTGTGCATCTCA	chr5R	686819725	SECCE5Rv1G0349830.1	Cyclic nucleotide-gated channel			0.036408367	0.093952227
PHT	3737861|F|0--19:T>G	TGCAGATCAGCAAGCTGGTTTCGGGCATCCTCTACTTCGGGTACATGCTGCTCGCCTCCTTCTCCTTCT	chr5R	687262431	SECCE5Rv1G0349900.1	Transmembrane 9 superfamily member			0.046105317	0.074193919
PHT	100054561|F|0--59:G>C	TGCAGCAGCGCAGTCGCGGACATCTGCGGGAGCCCGCCGCCCGACTCAGACGAGCTGTAGAGCGAAGGG	chr5R	690149450	SECCE5Rv1G0350370.1	Zinc finger protein, putative			0.037387075	0.044371534
PHT	100025094|F|0--52:C>G	TGCAGAAAACAGAACACTACAGTCTCGCTTGATTCAATCCACATGGAAACCCCACGTGCGTTGATACCA	chr5R	690471899					0.042355758	0.03635952
PHT	100074195|F|0--10:C>A	TGCAGAAGATCGAGACGATGGCCATCGAGGCGCTCAAGGTGCAGGCCGGCATCGCCGAAGAGCAGGCGC	chr5R	691329644	SECCE5Rv1G0350590.1	Protein PLASTID MOVEMENT IMPAIRED 1	0.038834093	0.054713312
PHT	100055568|F|0--65:A>C	TGCAGCAGCTGCGGGAACAGGCCAGGAATATGCTCCAGGGTGCCGGCACGCCGTAAACTAATGAAATGG	chr5R	691474526			0.002182365	0.109257736
PHT	100005556|F|0--56:G>A	TGCAGTTGTTGGAAATTCTCATCCAGCATGCCCTAGATGGATCCCATCATGAGAAGGCAAAGATAAACT	chr5R	694154903					0.049079515	0.02157955
PHT	100031122|F|0--25:C>G	TGCAGTCGATGGAGGAGGATGGCAGCGCAGCCCTGGGCTACGTCGTTGACATCATCAACCTGTTCATCA	chr5R	694154906					0.043759819	0.045643016
PHT	100016769|F|0--39:T>C	TGCAGGGGGAAATCAAGACAGCTTGGTTCGAGGCAATGGTCCTTCTCCTTGCTCTTTACTTAAAGCGAA	chr5R	695319719					0.046549417	0.053785486
PHT	100029363|F|0--63:T>G	TGCAGGAGTGAAGATTAACCTCACCTTCGGAGGTTAATGGACAACTAACAACCCAGGGAAGTATTAAAA	chr5R	697990398					0.024884389	0.033095671
PHT	3352487|F|0--64:G>A	TGCAGCTTCACCAGCCCCCTGAGCGCGCACAGCGCCTTCCTCGCCTGCGCGCCGATCCCGAGGAGCGAA	chr5R	698162333					0.034393953	0.097650522
PHT	4094275|F|0--51:T>C	TGCAGCTTCACCAGCCCCCTGAGCGCGCACAGCGCCTTCCTCGCCTGCGCGTCGATCCCGAGGAACGAG	chr5R	698162333					0.04708425	0.090205662
PHT	100042790|F|0--14:G>C	TGCAGAAGCAACTCGGAGATGGTATGGGGTAAAGAGTGTGATAACTTCCATGCTGAGTAGGCGTCAGTT	chr5R	699396746			0.042798654	0.02624599	0.034393953	0.091441174
PHT	4490430|F|0--23:G>C	TGCAGCACCGCGCGCAGCGGGAGGCGCTCGTTCTGCGCCGCGTGCGTGCACGCCTCCACCGTCAGCTTC	chr5R	700929869	SECCE5Rv1G0351560.1	Phototropic-responsive NPH3 family protein			0.044346559	0.075794938
PHT	100039378|F|0--51:A>G	TGCAGATAGTTTTTTCCTTTTTCAGCAGCATCAGTTATGATATGGTGAAATATTTCTAAACTTAGGCAT	chr5R	701269281			0.005777256	0.095931875
PHT	5207858|F|0--46:G>A	TGCAGCTCGGGCAGACGCCGCTGGTGGTGGTGTCGTCCAAGGAGACGGCGCGGCTGGTGCTCAAGACCC	chr5R	702672788	SECCE5Rv1G0351740.1	Cytochrome P450 family protein, expressed			0.027225376	0.120286362
PHT	5217407|F|0--32:G>C	TGCAGTCGCACCACTAGGGCAAAAGGAAAGAGGGTGCTCATGTTCCTTCAGTAGTTTGGATCAAGCGCC	chr5R	702966003					0.036286096	0.1317122
PHT	5045428|F|0--68:A>C	TGCAGATGCCGGTTGTTCGAGCAAAAATCTCACAAACAACAACTCCCCCTCAAAATCGATTGTATCAAA	chr5R	707092798					0.047190518	0.060256473
PHT	100010155|F|0--32:G>C	TGCAGTTAGTATGGAGAACGGACTGATGGCGCGAAATGATTTTTCTGTTTGAGACGAGGCCGTTTGAAG	chr5R	716379162					0.049057756	0.064581937
PHT	3909567|F|0--68:A>G	TGCAGTATGATCTTGTGCTTCCTCACCACCCTCTGCCCCGCCGGACCACCTGCGCCGCTGATCAACACA	chr5R	720762391	SECCE5Rv1G0353940.1	WRKY transcription factor			0.042233378	0.074016507
PHT	3910081|F|0--44:T>A	TGCAGTAGCTTGTTCTTAGGTGAACCACGTAGTTTCTTTAATGGTGATCCAAAGGGGAGGCACTGCCTA	chr5R	721119524					0.044091456	0.059456846
PHT	100025702|F|0--30:A>G	TGCAGGTGGCTGACGGTGGAGGAAGTTTTCACTCAAGGTTGTGGTCTGGGCCATGATGGAGGCGGACTC	chr5R	723045201					0.049237072	0.046873257
PHT	100016968|F|0--39:T>C	TGCAGTTGAGTGATTTGTCGGTGCAAAGTACCTCCGATTTGGAATACCGTATCTACTGTCTGTACAACG	chr5R	723342595			0.037082805	0.045214702
PHT	100053569|F|0--60:G>C	TGCAGCGGTGCAGGCCTCCGCATAAAGAAAGGGAACGTGGGCAGTCCGAGTCCAAGCAGCGCCGAATTC	chr5R	725977569			0.01211113	0.041464832
PHT	100019933|F|0--65:A>G	TGCAGCTGTAAAACAGCGGGACGCGCTAGCTATAGCTCTTTATTTTGTTCTGCTGCTGTCGCCGCAAGG	chr5R	726568714			0.018002177	0.066301192
PHT	100061804|F|0--11:C>T	TGCAGTGAGTGCTCCGAACTTTCCTTTCGCCGCTAAACCATCCCCGTTTTGACTTTTGAGATTCCGCGG	chr5R	735425450			0.025695639	0.08287838
PHT	100057316|F|0--62:T>C	TGCAGGTACGCCACGCTATTTCACCCGCGGCGAGTTCCTCGTCTTTCTAGATCCGCCTCCACTCCCGTC	chr5R	739540330					0.043759819	0.017187843
PHT	100037852|F|0--46:C>T	TGCAGGAGCGTCATGCCTAACAGGAATAAATTGCAAAAAACCACCACAATTAGGGATCCTAATTCACAA	chr5R	745652027			0.048329546	0.029752816
PHT	100053417|F|0--47:G>A	TGCAGGCGCCGCACGTTCGCCGCTATCTCCTCGGCCACATTCTTGGCGAAATCCTCCACCTCGGCGAAG	chr5R	756665639			0.039749137	0.03654071
PHT	100066380|F|0--26:C>G	TGCAGGCGCCGCACGTTGGCCGCGATCTCCGCCGTCACCTTCTTGGCGAAGTCCTCCACCTCGGCGAAG	chr5R	756676970	SECCE5Rv1G0358680.1	GDSL esterase/lipase	0.024438908	0.066360029
PHT	100017417|F|0--28:C>T	TGCAGATCAGCAGATCCGAAGCAGAGGCCGCACATGTTCTCAACCCATGGAAAAAGAATAGAGCAGAGC	chr5R	758846064					0.04382519	0.099229208
PHT	100074867|F|0--19:G>C	TGCAGCCAGGTGCACATGGGCATGTACATCTCGCTGGCCGCCGCTGGTGCCGTGTCGGCCGCCGAGCTG	chr5R	759815816	SECCE5Rv1G0359130.1	CASP-like protein			0.046398949	0.036275368
PHT	100031170|F|0--66:T>A	TGCAGTCTGACCAACAATTCTTGTGTTTAGTGTTCTTTGGCTTACAAGCTGTAACACCATGTGTACTAA	chr5R	776952051			0.044337415	0.057109108
PHT	3748702|F|0--46:A>T	TGCAGCAATGGAAGCTGCCGGCCAGGGGCAGTGAGCTGGTGCTTGAAGTTATTTGGCAAAGCTCTAGCT	chr5R	777993534					0.042900755	0.090713927
PHT	100011577|F|0--5:C>T	TGCAGCGCGCTTCCGAGCGATGACTGGTTCATCGAAGTCGCGCAGGACAGCATCAGCAGGATCAGCGGG	chr5R	780489331	SECCE5Rv1G0361610.1	Exocyst complex component EXO84B			0.03163267	0.037390192
PHT	100123314|F|0--41:C>T	TGCAGCAGCTTCTCCACGATCATGATGATGTTGGCGTAGTGCGATGCCAGCGCCGAGCCGCCCACGGTC	chr5R	784298186	SECCE5Rv1G0362200.1	Plant/protein (DUF668)			0.046549417	0.044372629
PHT	100075817|F|0--54:T>C	TGCAGATCAGCGCCACCGCGACCCTCCTCGCGGCCGCCAGCCGGCCGCCCGATTTATCCTCAGCCTCCG	chr5R	787048017	SECCE5Rv1G0362520.1	DUF21 domain-containing protein			0.036286096	0.094990453
PHT	3595269|F|0--44:A>G	TGCAGCTGGACCAGACGGCGACAAGCGGGCGTGGAAGGAGGAGGAGAGGGTTCGGTGAGCGCGATAGCG	chr5R	787430112					0.049668644	0.06919097
PHT	100042483|F|0--60:C>T	TGCAGATCTGGCGAAGGCTAAGCTGAACTGCACGGATTTCGTCATAGCCAACCAGTGCGACGTGGACGA	chr5R	787476004			0.023879629	0.038169624	0.049237072	0.04127418
PHT	100079069|F|0--14:G>A	TGCAGCTGGTTTTGGTGTTGATGGATGACTTTCATTACATGTAACGTATGCTGATTGTGAGTTTGTGAT	chr5R	789934064					0.044025878	0.136672066
PHT	100030001|F|0--66:G>A	TGCAGGATGCGTACGTGTGGCATATATGCTATACCACTACTCACATATAGTAATAGTAGTATTGTAGCT	chr5R	790848865					0.044091456	0.030152787
PHT	3342406|F|0--42:C>G	TGCAGTGTCCATCTGCTCACTTGCTTGTCAATGCTAATCACCCTGGATTCACTAAACAAATGGCGATGG	chr5R	792423587					0.046479354	0.083397233
PHT	100077017|F|0--8:A>G	TGCAGATGAGAGCAGCAGGTTGGTTGAGTAATTGGAGCGGGACAACGGACGAGAGAGAGACGTGCCTCT	chr5R	792943394			0.038834093	0.029676092	0.044091456	0.021979494
PHT	100023357|F|0--63:C>G	TGCAGCGATCGGTAAAAATGGGAGCAGACGTGGGCTGGGCACTGCGTGTTTGGGCGATGGGCTCCATCT	chr5R	795129463			0.025496751	0.02771123
PHT	100042928|F|0--39:A>G	TGCAGCAAAGATATAGCAGTTCAGACGTCGTTCTCGTAGAAAAAATGACGATGTTGGTTGTTGCAATAG	chr5R	796348690			0.037243643	0.056071113	0.049057756	0.021038755
PHT	100073954|F|0--8:G>C	TGCAGGTAGACGCCGATGGCCGTGAACTTGATGAAGTTGCCCCCGATGTCCATCCCCCGCACGCCTGCG	chr5R	802403401	SECCE5Rv1G0364630.1	Chalcone-flavonone isomerase family protein	0.047187023	0.028670896
PHT	100029672|F|0--45:G>T	TGCAGTTCATATCTCTCCTGGATCGTTGCCGAAGGGCCTGCACTCGCTGGATCTGTCGCGGAACAAGAT	chr5R	802422828	SECCE5Rv1G0364650.1	Leucine Rich Repeat family protein, expressed			0.042355758	0.049604178
PHT	100029510|F|0--47:A>T	TGCAGTAGAACCCAGTGTCTGTGTAGGGCACAGAGCGCACGCACCGAAGCCTTTGACCTTTGGTTTCTG	chr5R	806991086			0.032621104	0.021448788
PHT	100030398|F|0--40:A>T	TGCAGTATGAAGAGGTGAAGTTCAAGGCATTCGATTTGGCATCGAAGCCTGAAGGTGAGGGCACCCCGA	chr5R	807173168	SECCE5Rv1G0365460.1	NAD(P)-binding rossmann-fold protein	0.03671937	0.01993344
PHT	100047504|F|0--49:G>C	TGCAGTTGGGTGCGTTGGGTGGTGGGATCAGCTGTGGAGTCGTGGTTTTGCCCAGCTTCGTCCAAATGA	chr5R	815526953					0.045346419	0.085643604
PHT	100056926|F|0--53:G>A	TGCAGATCGGTGGGTACTTGCTCTGCTATCGATGACCTGTGGCGACCACCTCTGCTCGCCCCAAAAAGA	chr5R	815832326					0.03333058	0.056492222
PHT	100035494|F|0--61:T>C	TGCAGCTTCTTGCAACTTGCGGCTGAGCTCAACGGTTGTCGCAGCACTGCCCACTACCGTATATACACC	chr5R	817192006					0.04322127	0.057122422
PHT	3364253|F|0--5:C>T	TGCAGCCCTCTACTGAACGCCTGGTTGAACAGCATCCGCGTCTGGAACTCGGAGACGAAGGGGAACCAT	chr5R	819295045	SECCE5Rv1G0367090.1	Callose synthase			0.043119881	0.085909281
PHT	100033962|F|0--51:A>C	TGCAGCTTGCTAATCGAACAAAATGTCACCTCACCTAACTACAAATGGAAAAACAATTGTACAGTACAG	chr5R	823076812			0.027010939	0.060558918
PHT	3579835|F|0--14:G>A	TGCAGCTCCCGTCTGTGAACCCACCCTGCGGCCTCCAGCTGCCGGCGGCGAACCATGGGATGCCGAATA	chr5R	824886143	SECCE5Rv1G0367900.1	NAC domain-containing protein			0.045765318	0.068294195
PHT	100024393|F|0--55:A>T	TGCAGAAAAAGAGGGCATGCATATAGTTCCAATTCAGCATAGTTTTGCGGAAAAAATTTGAACAGCGAG	chr5R	827984532					0.039253365	0.09884653
PHT	100052856|F|0--15:C>G	TGCAGCTTTCTCTCCCGTGGCGCTCGTGCTCTGGTGGATGGAGGAGAGGAGCCTCCAAGCATGTATCGC	chr5R	833198545					0.049057756	0.042589478
PHT	100108112|F|0--43:A>G	TGCAGGAGATGCGCGTGCGGGTATCGAACCGGCAAAGCTACTTACGGTCGGGGCGGGCGTACATGCTCG	chr5R	837639187					0.049571521	0.066481414
PHT	100055773|F|0--14:G>A	TGCAGGCCTTACTGGTGCAGCAGCCAAAAGCCAAAGCCCAGGGTCAAAAAATATCAGGGTAAAGCCTAT	chr5R	839546302			0.007431068	0.040533702
PHT	100030450|F|0--47:A>G	TGCAGTACACTTCAGAGGTGGCTAACCATTTAATCAGAGAGCCTTTAACCGAGTTACCACCATAGTTGA	chr5R	841273478			0.032621104	0.061181175	0.005037073	0.122626168
PHT	100109866|F|0--62:A>G	TGCAGTCGCGAGTGAACGAGGAAGCTGTTTTTTTTTTCTTTTCCAATTCATCGTCCAACTCCATGGTTC	chr5R	841359413					0.02860321	0.107785597
PHT	100108541|F|0--64:G>C	TGCAGGCGCAGGCGGCGCAGCAGTTCAGGATGCAGGACCTGAGCAAGGCGATGAGGCCCGACGCGGCGG	chr5R	841431002	SECCE5Rv1G0370270.1	Nascent polypeptide-associated complex alpha subunit, putative, expressed			0.010320669	0.159107325
PHT	100086204|F|0--66:T>A	TGCAGTGCGTCACGCCGATCGTGTGCGCGCCTGAACGTATACAAATGAGAAACGCAGAGAGGAAAATAA	chr5R	841580925					0.049057756	0.070862473
PHT	100085806|F|0--58:G>C	TGCAGGTGTTTGATCCACACAAGAAACTCATAAAACCTTAAGCCATCGACTACCATGAGCATTTCTAAG	chr5R	842734800					0.047142815	0.064276104
PHT	100047768|F|0--57:A>C	TGCAGAAATCGGCAAAGCAAGCGCTAATGGACGGCGTGCTACCTTAATTAATCACGGAAAAGAGGAAGA	chr5R	846019922			0.021353867	0.043578824
PHT	100007259|F|0--23:A>G	TGCAGGGTAGCCCTAACATTCCCACACGCAGCGGCAAGCTCGCCCTCAAGAGGAAGAGATCACCGAGAT	chr5R	849462755			0.045865172	0.036825718
PHT	5210377|F|0--32:C>T	TGCAGAATGGATGGGGGTGGATGATGGTTCAACGAGCAGTGCTCAACTCGGGTGGGTGCTCTGCTCTAT	chr5R	849817762					0.046537285	0.102471166
PHT	3364823|F|0--31:G>C	TGCAGCGAGCGCTGGACGCCAACGCGCACCTGAAGCACTCCACCTTCTTCCAGCTCGTACGCTCCCATC	chr5R	851183098					0.049057756	0.059676223
PHT	100079126|F|0--32:A>G	TGCAGGTACACTGCCGACTAAAACATCGTAACATGACGAGAATGCCCTCGGAGCTGCTGGTTGCGTGAA	chr5R	852533849			0.037082805	0.035162674
PHT	100042411|F|0--13:C>G	TGCAGAGAAACCTCGGCGACGAGATGCGGGAGTTCTCGCTGCACAGGTTCTTCGATTGCTCTTTGGATT	chr5R	853114161			0.022551666	0.026681174
PHT	100139552|F|0--12:T>C	TGCAGTAAGTTGTATTTCAACGACGATGATGAACGCAATCATTTGGTTGGGTATATGTTGGTGCAGATG	chr5R	853429182					0.042233378	0.04329169
PHT	100034456|F|0--33:T>G	TGCAGCACACACGTTACCTCATTGATCGGCGCATCTGCATTGTCCTTCTGAATCGCCAACTCTTGCTCT	chr5R	853584377					0.043759819	0.051553487
PHT	100013740|F|0--20:A>G	TGCAGCTTCTGCCTCTCGCCAGACTTGAAGGCCACCGAAGAACCCTTGAAGTCCTGCTGCTTCAGAAGC	chr5R	853759256	SECCE5Rv1G0372620.1	Acid phosphatase 1	0.034122899	0.075513001	0.042493796	0.079470963
PHT	100018810|F|0--32:T>C	TGCAGCGAGCAGGCGGAGATGATCCTGGTGTATGAGTACATGGAGAAGGGCACGCTGCGGAGCCACCTG	chr5R	855721466	SECCE5Rv1G0372970.1	Receptor-like protein kinase, putative	0.043160781	0.030308604
PHT	100087508|F|0--30:T>G	TGCAGGAGGGTGCCGGTGAGCCGGCGCACCTGCGTGCACGCGGCCGTCGGCACGAACTCCCTGAGATAG	chr5R	861901029	SECCE5Rv1G0374090.1	Sphingomyelin phosphodiesterase 4	0.011660944	0.039639646	0.02257989	0.091524243
PHT	100038188|F|0--65:C>G	TGCAGCTTGGGGATGTACTCGAGGACTTGACACACCGTCGTCGGAATGCTCAGCTTCTTCTGCTTCCAG	chr5R	864809430	SECCE5Rv1G0374810.1	Basic helix loop helix (BHLH) family transcription factor	0.029457449	0.038710679
PHT	100061156|F|0--11:G>C	TGCAGGTTGACGACCTTGCCGTGTGCCGGCAGTGCGTCGTAGCAGTTCTTGAGCAGCGTCGCGCACTGC	chr5R	865578937	SECCE5Rv1G0374960.1	O-methyltransferase	0.038852355	0.035997334	0.041397392	0.082363915
PHT	100034612|F|0--33:C>G	TGCAGACGGTCCACACCTCCTGCATTTTCAAGTCGTATGCGCATACGTTATTGTGTCAATGACACTTAG	chr5R	866926913			0.040146616	0.041372651
PHT	100012997|F|0--11:T>C	TGCAGCAGCCTTCGAAGAGCATTCTCCAAGGTCTGGTTCTCCTCTAGCACCAGCACCGTTTGCTTCTGC	chr5R	868174467	SECCE5Rv1G0375410.1	THO complex subunit 1	0.045144301	0.02270762
PHT	100012997|F|0--8:C>T	TGCAGCAGCCTTCGAAGAGCATTCTCCAAGGTCTGGTTCTCCTCTAGCACCAGCACCGTTTGCTTCTGC	chr5R	868174467	SECCE5Rv1G0375410.1	THO complex subunit 1	0.016976318	0.067608514
PHT	100020703|F|0--45:C>T	TGCAGGCAACTGGCAGCAACCATTACTATTTTTTATTATTTTTTGCGGGTACCACTGCTAATAATTGCA	chr5R	868847968			0.03381624	0.023858467
PHT	100137782|F|0--48:G>A	TGCAGAACGCCGTTTCTCTGGTTATCAAGAAGAAGAGAGAGATCTTTCGTGTTAAGTACGAGCGGCTGC	chr5R	872876577			0.018218714	0.059571371	0.046537285	0.063059775
PHT	3344181|F|0--28:T>C	TGCAGGGCGAGCGCGAGATGGCAACGGATAACAAGCTCCTGGGCGAGTTCGACCTGGTCGGCATCCCGC	chr5R	873940820	SECCE5Rv1G0376800.1	Chaperone DnaK			0.044091456	0.048514146
PHT	100032045|F|0--51:C>T	TGCAGAAGCCGCTGTTTCTGAAGGAAAACCCTTCTGTGTTACTCATGCTGACGTGGGTCTTGATACCAC	chr5R	874759101	SECCE5Rv1G0376900.1	Alanine--tRNA ligase	0.038834093	0.028839249
PHT	5211022|F|0--53:C>T	TGCAGTAGAGTCGCCGAACACAAAGATGGCCGGAACCTTCGCCATGGAGGCGACGGTGCTGCTCACCAC	chr6R	148609	SECCE6Rv1G0377110.1	GDSL esterase/lipase			0.021652583	0.110814427
PHT	100041337|F|0--19:A>G	TGCAGCAGGTGCCAACACCACCGTTCAGTCAAGCAAGCCCCCTTCATCTTTTCATCAAGGTTTTATTAC	chr6R	4073735					0.032982999	0.046941562
PHT	100025060|F|0--11:G>A	TGCAGCCGCCCGTTGATGATTCCAAGTCGCCGGCCAGGGCGGCCTACTAGTAACTACTACGTCTTGCAA	chr6R	9197623			0.045144301	0.030279465
PHT	100017808|F|0--28:A>T	TGCAGCTGCGCAAGGTGGCGGTACATGAAGATACACGCTTTTGGCTAATCGGATCTCCAACATGGCGGC	chr6R	11430579					0.032982999	0.026053731
PHT	100018078|F|0--18:C>A	TGCAGGGTGGGTCCTGACCCGAGCCACTAGCAAAATCGTCAAAATCGTAACCATTTATACCACTGGATC	chr6R	12253209					0.037591012	0.075167331
PHT	5205700|F|0--26:C>A	TGCAGCGGCGGTGAATGCGGGCGCCACGGACCAAGTCCGTACTCTGGTGGGAGGAGGACGGACGGAGGA	chr6R	13048206					0.04572013	0.054414069
PHT	100061420|F|0--55:T>C	TGCAGAGGTGGGCTGGTTATGTTCTTCGTGGTGAACAAAATATGTGGAGGTAACCTGATCCTGCACACA	chr6R	19981856					0.040033647	0.057526282
PHT	100005222|F|0--36:T>C	TGCAGTTGAGATACAGAGGCCCTGAGCCTCTCCACCTCCTGACGAGTTCCCGCCTCGAATTGCTGCGAC	chr6R	20388488	SECCE6Rv1G0380270.1	Cortactin-binding protein 2	0.0435146	0.029000938
PHT	100005222|F|0--40:G>C	TGCAGTTGAGATACAGAGGCCCTGAGCCTCTCCACCTCCTGACGAGTTCCCGCCTCGAATTGCTGCGAC	chr6R	20388488	SECCE6Rv1G0380270.1	Cortactin-binding protein 2	0.032621104	0.031952659
PHT	100013939|F|0--11:A>G	TGCAGAACTATAACGAGGGTGCAAAGGGCCGGCCTTGGCGGCGGCAAGGGAGGATCGGGGGAGGAGGAG	chr6R	22196272					0.02257989	0.211972608
PHT	3600696|F|0--26:C>G	TGCAGCTCCAGGCCCAGCTCCTCCTCCACGTCGTCGGACGCCGAGATCAGCAGCAGCTCGCACCCCTCG	chr6R	29317833	SECCE6Rv1G0381060.1	F17F16.3 protein			0.049994618	0.039792304
PHT	5217893|F|0--19:G>A	TGCAGCCGCTCCAGGACAGGACCAGCGACGCCTACCGCTGGATGGTGCACCACGGCGAGAGGTACCGCG	chr6R	34338821	SECCE6Rv1G0381620.1	Glycosyltransferase			0.039930166	0.060479336
PHT	100013748|F|0--58:G>A	TGCAGTTCCAAACTAACAACAAAAGGTGAGTTAGCGTCGAAATCCATCGAAATCCACGGATCTAAGAGC	chr6R	40464993					0.038100713	0.14290494
PHT	100006613|F|0--36:G>A	TGCAGCGGGCATTTGGGGCACTTAGCATCATGAAAAGTTTGAGTTTTAGTTGTGCCAAATCTTAGACAA	chr6R	43431123			0.020738577	0.06764237
PHT	100030714|F|0--35:T>G	TGCAGGCAACATTTTGAATGGATCGCAAATGCTTTTGGCAAAAGATGTGGCAGTAGGTACGCAAAAGAT	chr6R	48981406			0.019586868	0.069436812
PHT	100029666|F|0--57:G>T	TGCAGAAGCGAGGGCTTGCGCTTTTGTTGACGAGTTGTAGTCAATGCTTAACCCACTGATGTTGACGTA	chr6R	50909480					0.03163267	0.067098058
PHT	100193654|F|0--61:G>A	TGCAGGATGATGAAGAGGAAAATGAAAAGTGGGGACGAAGTGGCGGCCAGGAGCGGCAGGCGTTTGCCT	chr6R	52584197					0.01516155	0.194049658
PHT	100061355|F|0--17:T>G	TGCAGCTTCTGCGCCTTTTGCTGCTGCCCCAATGCAGTTCTTGGGGTTTTAACCCCACGAGTGGTGCTC	chr6R	65401750			0.047073438	0.018744688	0.022656006	0.043513936
PHT	3603121|F|0--28:C>T	TGCAGTCGGTGGGCTTCAGCGCGGCGCCCGTCTTCGCGGCGGCGGGAATCTGGTTCGCCGTGTTCGGCG	chr6R	84392283	SECCE6Rv1G0385720.1	Transmembrane protein			0.040121588	0.103870369
PHT	100015174|F|0--35:C>A	TGCAGTGCTTCTCTTCTCTCCTCGTTTCCCCATCTCTATCGATTTGGCGATGCGAAGGGGACTAACCCT	chr6R	85038006			0.038852355	0.044191967
PHT	100057632|F|0--65:T>C	TGCAGGAGGTTGGGCGGGATAGAGATGGGGCGGCCGCCGCGACTGCCACCACGGAGGCGCAGCACTAGG	chr6R	88985498	SECCE6Rv1G0386020.1	Ubiquitin			0.03003634	0.086598283
PHT	100030971|F|0--45:G>A	TGCAGCGTGTATGTCATTTGAGATCCTACCGATGACTGTATTCAGGATAACGCGAGTACAAAACCAGCC	chr6R	102506023					0.036537255	0.039606351
PHT	100030069|F|0--14:A>G	TGCAGGAGGCGACTATCCGATCACAATGCTCGGCGCCGGAAGCCACAGCCAGACGCATTCTCCTTTGCA	chr6R	103640001	SECCE6Rv1G0386950.1	Squamosa promoter-binding-like protein			0.013786461	0.081407891
PHT	100068188|F|0--18:T>G	TGCAGAGGGTCTAAAGGATGGGGTGATCATGAGCAAGCAGGAGAGTACAGACTCTAATCGTTTCAGGAC	chr6R	142464365	SECCE6Rv1G0388820.1	root meristem growth factor			0.037166858	0.036351936
PHT	100021637|F|0--14:G>A	TGCAGTCCAACGATGCTCAGCTTAGCTCAGCTCACTAATTGATCTAGGTGTAGTACATACGTAGTTCTT	chr6R	168253987			0.049280838	0.013400665
PHT	100014614|F|0--6:T>A	TGCAGCTGGTCCGCCGCCCAGCACATGTTACAGAAAAGAACTAGCCATCCAAGAAATTTCATTGTCTCA	chr6R	182907620					0.044091456	0.044468996
PHT	100048828|F|0--64:C>T	TGCAGGCTTGCTCCACGCTACACGCATCCACGCACGCCCTTGCCTCTCCAATGGGCATCCATGGCCGTA	chr6R	206686496			0.019247123	0.042352399
PHT	100062902|F|0--42:C>T	TGCAGAAAAGGGGATGTTAGCAGCAGCAGATCAGCCCGCAGCCGCCTTCTGGGCCTCCCCCGCACCCAG	chr6R	207726989					0.03821284	0.033749954
PHT	100047010|F|0--33:A>G	TGCAGGCACCCTGCTGCACCAGACACAGACTGGACGCACAGGGCATGGCGTTCATCTTGTGGTCGGGAG	chr6R	244917369			0.044084696	0.026330303
PHT	100009182|F|0--16:C>A	TGCAGTGAAGCAGCATCGCTTGGCGAGGGATGCAACATGGCGGAACAGCAACAGAAATTCAACAGGCAG	chr6R	435876461			0.014181705	0.037080121
PHT	100013843|F|0--57:C>T	TGCAGCAAGCACCATTCAAGCTACAGGGCACTAGGTTGAGCTAGCAATGGCCAAGGACATTGAGGCGGC	chr6R	436070082			0.012176421	0.035449765
PHT	100032947|F|0--26:A>G	TGCAGCTTAATTAGAGAATACATTAGAGACCGACCGAGGAGGGTTGATGCGCTGATTGAAGTTCTCATA	chr6R	441762875			0.018656585	0.029418051
PHT	100058090|F|0--23:T>A	TGCAGAAGAGTGGCAGTGAAAACTTCGGGGATGTGCTTGAACGGCGAAATCCACTAGCCTTTGGTCATT	chr6R	442204213	SECCE6Rv1G0399590.1	SET domain-containing protein 9			0.036286096	0.042477586
PHT	100028335|F|0--33:T>C	TGCAGCATCTTGTCCTGTGTGGTCGCGTCTGGTTCTAGGATGATCTGAGTTCGCTCTTGGGATTCGCCG	chr6R	445250238			0.018002177	0.057595701
PHT	3750302|F|0--7:G>C	TGCAGAAGCTGAGATGTATGGTTTTTTCCCATGTTTGCATTACAGAGGTGGAGGCTTCATCTCCTTGGA	chr6R	448180655					0.042493796	0.11752387
PHT	100029511|F|0--43:T>C	TGCAGTACATCGATCGTACAAGTATAAGGAGCCGTCTCATCGTTCACCCTTCATCAAAATATAAGGAGC	chr6R	448391739			0.001392055	0.119680401
PHT	100003665|F|0--42:T>G	TGCAGTGGCTCATTAATCAATTCCGCCTGTAGATCTTACACATTTGTTTTTGAGATAATACATGGAGTC	chr6R	452723028					0.024884389	0.040764853
PHT	100055063|F|0--19:T>C	TGCAGCACAACCGCCTCACTGGGAGCCTGCCGTCGATGGGCAAGATGCGCTCGCTCGTCCACCTCGACG	chr6R	453245535	SECCE6Rv1G0400490.1	Leucine-rich repeat receptor-like protein kinase	0.039615897	0.053433088	0.03821284	0.052605556
PHT	100013116|F|0--7:G>A	TGCAGCAGCAGTGCAGCAACATCAGCCAGAAGACACAGCAAGGAGGAGCCACAATAGCTAGCAATGGTT	chr6R	455152222			0.035701881	0.035072832
PHT	3743748|F|0--7:A>G	TGCAGCAACAGTGCAGCAACATCAGCCAGAAGACACAGCAAGGAGGAGCCACAATAGCTAGCAATGGTT	chr6R	455152222					0.048168092	0.102171057
PHT	100033411|F|0--17:A>G	TGCAGAATTACAAACGCACCCCTTAATCTGACCAAATGTCTAACAAATTTCAAGAAACTCTATATTCCT	chr6R	458529869					0.032218787	0.039443309
PHT	100027491|F|0--9:A>T	TGCAGTCAAATTTTTAGAGGATTAACTGTAGTGTTAACTTCGCAAGAAAAGGGGCTGAAACCCTCGCAG	chr6R	459453432					0.046549417	0.032402472
PHT	100012575|F|0--8:T>C	TGCAGAGTTTAATTACGACTTGAGGACGACTGGCCACTTTCTTAATCTATATATCTCCTGCATTGGCGG	chr6R	461792795			0.039749137	0.03495242
PHT	100048805|F|0--58:T>G	TGCAGTTTGGGATTAATGCGGTTGTTGATGCGAAGCGAGCTGCCAGGGGAGCCCCCGCTTCCCTTTATG	chr6R	461927593	SECCE6Rv1G0401030.1	pH-response regulator protein palA/RIM20	0.025039569	0.040799224
PHT	100017393|F|0--36:A>C	TGCAGCGATCACGTAGGAGTTCACTATTGGCAACCTATTCCCTTGAGAATTTCCATGCCAGGAATCCAG	chr6R	462855331					0.045256848	0.087059697
PHT	100055902|F|0--67:G>A	TGCAGGGCACCTTCGCCCTCGTCCTCCGCGCCTACAACCCCAACAAGCGCACCGCCGTGTACCGCTCGC	chr6R	463783700	SECCE6Rv1G0401180.1	Late embryogenesis abundant (LEA) hydroxyproline-rich glycoprotein family, putative	0.048804371	0.032527685	0.02257989	0.122206215
PHT	100011173|F|0--22:T>G	TGCAGCTTAAGGGTCGTACTGATAAAAGAAGAAGAGATAAGTAATGGAGGGCCAGAGATTGCAACAAGA	chr6R	486232588			0.039615897	0.038630851
PHT	100127363|F|0--5:C>T	TGCAGCAGCCAAAGCGCACCGACCACGCCCAGCCCAACGGCCAGCCCGGTGACCACGCCATCTCGATTG	chr6R	486747764	SECCE6Rv1G0402670.1	Receptor-like protein kinase			0.049057756	0.042239065
PHT	100005995|F|0--34:C>T	TGCAGTGCTAGAAAGAGAACTCCGTGTCACAGACCGTGTGCCGACGTGCCGTTGCATGCTGACCTCCCT	chr6R	488130802			0.022960147	0.046290162	0.02257989	0.062696473
PHT	3344364|F|0--59:T>G	TGCAGACACATAAAACAGAAATGATATAACCATGCAAAGTTAAACAAGGATTATACCATTCGCACGGCT	chr6R	503697754					0.036209598	0.179338155
PHT	100040900|F|0--8:C>G	TGCAGGCCCCCACTAGCTACTGTACTGTACTGTAAATGCGTAACTAGTTTAGTTTAGGAGGGATCAGAA	chr6R	511820470			0.047080671	0.015292291	0.046758176	0.036454889
PHT	100027424|F|0--47:G>C	TGCAGCCGATCGGTTGAGCACCAAACCATCATCATGAGGAAGGAATTGATAATATCAAAATTAAACTAA	chr6R	523684265					0.012415717	0.067615526
PHT	100069055|F|0--24:A>C	TGCAGGGGGCGGCATCAGGCTGATATGCTATGGCTGTCGTTCCTCGTCGCAGAGGCAGACTACCAGACC	chr6R	542037587					0.024884389	0.117309931
PHT	100040289|F|0--41:C>A	TGCAGCGTCACAGGTTCGTTCCCTTCCACCGATTTCTTTGTCAGATCTAGCAGCAGAATGATAGCGTTG	chr6R	549949570			0.026417279	0.028649853
PHT	100069324|F|0--23:C>G	TGCAGGGGAGGCGTGGTGAGCTGCTTCTGCTCTTGCCCCGGCCGGCACAAGGAGGCATGGTGAGCTGCT	chr6R	554021055					0.04880427	0.041057191
PHT	100008301|F|0--53:G>T	TGCAGCTGCACGCCTCCCCTATAAATCCACCCCGCTGCGCTCCCGCCTCCATAGTCACAGGCCATCCGC	chr6R	555360460			0.02805746	0.048719707
PHT	100022210|F|0--23:G>A	TGCAGCTCCAGCTAGCCGCCATGGCCGCACCACCATGCAAGGCACAACAAACTCTATGTAATCGCGTGT	chr6R	560037734					0.042200017	0.020712643
PHT	100034919|F|0--40:T>A	TGCAGATGAACACACACACACCCAGCGATAAACCTAAAAATTCAATTTTGTTTTACCACAAAGGCATAA	chr6R	566936261			0.020934758	0.029194128
PHT	100048252|F|0--21:G>C	TGCAGTACAGGCACGAGCGGGGCCTCTTCGAGCAGAAGGCCAGGCGCTGGACCCGCAGATACGCCTCGG	chr6R	566995266	SECCE6Rv1G0407990.1	Ubiquitin-conjugating enzyme E2	0.028172093	0.020832422
PHT	100041261|F|0--50:C>T	TGCAGATCGACAGCAAGTCGCAGCAGGTTTCTTCGAGTGAGTGAGATCTCCCCTTGGCCAGCCAGATCT	chr6R	574544851					0.038858498	0.036876325
PHT	100009644|F|0--26:A>G	TGCAGCCTAGCAGAACCAGATTCCTGACCGTAGCGTAGCATGGCCATAGGCGTGCACTTTGTAGAGCCC	chr6R	582582676			0.017493618	0.02860079	0.036537255	0.021871818
PHT	100060953|F|0--14:T>G	TGCAGAGAGGCTGGTGGATTTATATCTACCAATGGGCACATCTCTGCCATACATCCAACCATCGTCCAT	chr6R	586457891					0.049048359	0.046034053
PHT	3747881|F|0--14:G>T	TGCAGAGAGGCTGGGGGATTTATATCTACCAATGGGCACATCTCTGCCATACATCCAACCATCGTCCAT	chr6R	586457891					0.049057756	0.072704196
PHT	100051335|F|0--18:G>A	TGCAGATTGGCATGAGGTGAGACTAGTCAGCGAGATTAATCAAAAGGGTTGGTTAAGGATTGATGGTTA	chr6R	594350065					0.036209598	0.0972732
PHT	3886139|F|0--55:G>C	TGCAGCGGCACGACGAGGCGGACTCGGCGCTCCGCGGCGCGCCGAGGTTCGGCGTGGACGAGTCCACCA	chr6R	595323240	SECCE6Rv1G0410130.1	TPR repeat-containing thioredoxin TTL4			0.036286096	0.069053516
PHT	100013003|F|0--54:T>C	TGCAGCTGCCCAAACAGCCGCGCCCCTTCAGACTCCAGTTTCTGGACAACTTCCTGGCGCAAGCAATGC	chr6R	598203188			0.011299099	0.052204923
PHT	100045136|F|0--51:G>T	TGCAGCAAAGCTCGTTAGGTCCTGGGGGCACAGCTCGGGCTGGGACGAAGCGAAGCGAAGCTCGGGGAT	chr6R	603711404					0.038443114	0.020679501
PHT	100050485|F|0--45:G>A	TGCAGCCATGCCGGTCTCACGAACAAGAGGCTGAGGTTCTATGACGCCATGAGGGCGGAGCACGGCATC	chr6R	611332609	SECCE6Rv1G0411860.1	Pentatricopeptide repeat-containing protein			0.044346559	0.038884745
PHT	100015159|F|0--44:G>C	TGCAGGAGGAAAGTCAACAGTATATCATCGTGTACGCACGCAGAGATGACGATATAGACGCATGCATGC	chr6R	618006124					0.043759819	0.021684387
PHT	100093121|F|0--22:C>T	TGCAGCCCAGGCCCAACATGCTCCTTTTTCACCTCTTTATTTATTTACGCTGGCTTTTGCGGTGATGGC	chr6R	618091721			0.048205678	0.017187729
PHT	3590657|F|0--37:C>T	TGCAGGCTGGCGTTCCAGCAGATGCTACAGGAGCAGACGGCCATCAAGGAGGCAGGTGGGCCGCTGGCC	chr6R	633858588					0.02257989	0.104867971
PHT	100007343|F|0--63:A>C	TGCAGCCAAGGCCGCAGTCATCGCCATTGGTGAAGAGATAGCAACATATGGACTTCCATCTGGAATTTG	chr6R	635703022	SECCE6Rv1G0414680.1	Lysine ketoglutarate reductase/saccharopine dehydrogenase	0.042798654	0.017069369
PHT	100003928|F|0--59:A>G	TGCAGGCATGCATGCACCTGCCTTTGTCTAGAACGTCTCATCTTGTAGTATTGATTTGCACTGCACGGG	chr6R	638199159			0.030387891	0.056537639
PHT	100035759|F|0--58:G>C	TGCAGATCCAGATCAGCCTGGCGCAGCAGTTCGTGGTGCCGCAGAGCCACATGCGCGCGATCCACGGCC	chr6R	638548776	SECCE6Rv1G0415000.1	Pathogenesis-related protein 1	0.04690209	0.014711724
PHT	100051632|F|0--5:G>C	TGCAGGATAAGGAGCTGGCGGTGCCGCTTGCCCCGCATTAGCAGCCCCACTGCTTGCCTGAACCGAGAT	chr6R	639279398	SECCE6Rv1G0415130.1	Protein FLX-like 1	0.016976318	0.06546422
PHT	100043002|F|0--46:T>C	TGCAGAGCAGAGTTGTATGCAACTCTGGTCGATAAATCTGGAATGTTCTTCCATTCTTCTCTCTGCACT	chr6R	639789823					0.047895162	0.028613335
PHT	5040623|F|0--58:T>C	TGCAGAGGTGGCCAGACCGGCACCTCAAGCTTTGACAAGTAGCAGCCGCGGCCGGGCTTAGTGCTGTCC	chr6R	642316671					0.032086606	0.103867485
PHT	100029778|F|0--17:T>G	TGCAGTTTCAGTAATGTTGGAAATTTGGAGCAGTAGAAATAAATACACACATGAGCATGACAAAACCAC	chr6R	642810507			0.046878023	0.042044135
PHT	100014834|F|0--26:T>G	TGCAGCATCTTGATCACGTCCACCGTTTCGTCCAGGTAGTACTTGGCCATGCTGGGCTTCTTCCCCACG	chr6R	643019089	SECCE6Rv1G0415660.1	Trehalose-6-phosphate synthase	0.020007038	0.088385976
PHT	100034918|F|0--56:A>G	TGCAGATGGGATTTACCAGCGGAAAGTTTTTACGAGCTTTCTGTACGTGTGGGACAAGCGAGATAAAAG	chr6R	647527595			0.038003727	0.036654647
PHT	100027354|F|0--39:G>T	TGCAGCCATCGCCACTTGTCAGCTCCGCGCCCTGCCCTAGCCCTGTTATGCAGCCGCCGCCGCCGCCGC	chr6R	648814874			0.036026896	0.025271428
PHT	100060407|F|0--22:G>A	TGCAGCTGCCGGCGGCATACGCGCCGATGAGGCTGACCAGCGCGATGACGATGCAGGCATAGAGCACGC	chr6R	659667757	SECCE6Rv1G0417900.1	Embryogenesis transmembrane protein-like	0.02219447	0.06177408
PHT	100029102|F|0--36:G>C	TGCAGTGGCCGACGGGCTGCGGGGCCGTGCTGCTGTGCTCAGAGATGGGAGGCCCCGTTCTAAAGGCGC	chr6R	659833091	SECCE6Rv1G0417870.1	Methionine aminopeptidase 2	0.0361822	0.036762616	0.045256848	0.03965698
PHT	100023333|F|0--6:A>C	TGCAGCAAGTGTCAAGTATCTGGAACTGCAAGTCCTCATCCTGTCAGAGATCAATGTCACTGGTGACTA	chr6R	660793136			0.048396093	0.034556265
PHT	100030513|F|0--40:G>C	TGCAGCAACGTGGACGCTCCTCTTTGTCTCGCTTGTCGAAGCAGCAGAGCCCTTGACCACATTGACGAC	chr6R	660793340	SECCE6Rv1G0418050.1	Signal transduction histidine-protein kinase ArlS			0.043403403	0.031691573
PHT	100055217|F|0--35:C>T	TGCAGTCCCTGCTGCCCCCACGCCACCTGCTCCTACCCTCGCCGTGGCAACCGCCCCAGTTCCACCAGC	chr6R	660812578			0.022903166	0.095906662
PHT	100028645|F|0--51:A>G	TGCAGATGCTAATTGACTTGATTGTATTCGCGATTGCAGAAACCAAGCGATAATTTGGTCAAGGGTTCT	chr6R	661024995			0.034698973	0.059445353	0.032086606	0.090959118
PHT	100011798|F|0--48:G>A	TGCAGCGACGTGTGCCCTCCTTTTTTCCCCTTGTATGCATGTATGAACGCATGTACTAATCCTTGTTGT	chr6R	665867602					0.036408367	0.098898126
PHT	3360613|F|0--7:G>A	TGCAGAAGAACAAAAATATGCAAAGAAAGCCGCCGCAAACGTATTACATCTTGAAACCAATCCATGACA	chr6R	666042210					0.046549417	0.121944949
PHT	100036670|F|0--33:G>A	TGCAGGGACAGTGTGCTGAAAATTCGAGACGTCGCATGTCGAAATGGAACTTTTTCATCATGGAAATTA	chr6R	666057301			0.022903166	0.088950744	0.040121588	0.048337918
PHT	100011360|F|0--15:A>G	TGCAGATGGTGCGCTAGTTGTTGGTAAAAACTAAGTTCTTTCAGTGATTCATGGATTTTAAAAAAATTG	chr6R	666562009			0.040317237	0.031752617
PHT	100011051|F|0--68:C>G	TGCAGCCCTGCTCCCGCAACTTGGGCACACAATCCGCCGTCATCGCTTGGACGTCGATCGCCACTATTC	chr6R	666845639			0.004469304	0.048014261
PHT	100082247|F|0--18:T>C	TGCAGCTTGGCCATGCAATCAAATCGACCGAGTTCGATCTAACACCAAATGGGGTCCTTTTCAGAGGTA	chr6R	669931354			0.02369933	0.034577498
PHT	100059123|F|0--47:G>C	TGCAGCGCCTTCATCTTCTCGTTGATCTTGCACCGCCGCCTCTTCTCGGAGAGGTTGTGCACCTCGGCG	chr6R	671098243	SECCE6Rv1G0419580.1	basic helix-loop-helix (bHLH) DNA-binding superfamily protein			0.046398949	0.01999958
PHT	100086231|F|0--9:T>G	TGCAGGTGATCTCTGGACATATGGCTCACGTCCGTCAGCCGAAGAGTACAAAAGAATGGTGCAGATAGA	chr6R	673594770					0.041532565	0.104640609
PHT	100019751|F|0--13:C>G	TGCAGGGATTTCACTAGACAGCCAGAAGCGAAGATAGATCACATCGACCCATGCTGCACTGCAGCCGAG	chr6R	676279714					0.038858498	0.074381937
PHT	100011934|F|0--66:C>A	TGCAGCGCGCAAGCTGGGGGAGGCACGGCGCAATTAGCAAGGCCACATGTCGTTAGCACTCTTCTTCTA	chr6R	678474040					0.045332813	0.018605088
PHT	100013110|F|0--40:C>T	TGCAGAACCTCCAGTGGATCAAGATCATTCTAAACACTTTCAAGAACCAACTTTGCGACCTGCATACCG	chr6R	679636524			0.005266876	0.085853912
PHT	100033209|F|0--23:C>A	TGCAGCTCTCCCTGCTCTCCCCACGGACCACCTACGCCGCCTACCTCGTCTACGCCATCGCCGACGACT	chr6R	680846900	SECCE6Rv1G0420920.1	F-box protein PP2	0.048336054	0.022458692
PHT	100040067|F|0--32:T>G	TGCAGCAATTCACAAGATAAGGGATGGCTATGTTAAAGGAAGACAAAATGAGGAAGTTGTTAGAGCTAA	chr6R	683512466	SECCE6Rv1G0421360.1	Kinase	0.024747819	0.026859996
PHT	100078748|F|0--10:T>C	TGCAGCTCGCTGGCACGACGGGCAGGATCCCGCCGGGGTTGAGCGGGAAGAGCGTCCCGAAGTACCCGT	chr6R	683947879	SECCE6Rv1G0421460.1	Glutathione S-transferase			0.036537255	0.11495453
PHT	100006564|F|0--32:G>A	TGCAGAAGATTTAGGCCTAATTATGGTACTTGGTCGACTATGTGTTAAATATCCTGTTGTGTTTGGCAA	chr6R	686259825			0.032673384	0.027570486
PHT	100006564|F|0--42:T>C	TGCAGAAGATTTAGGCCTAATTATGGTACTTGGTCGACTATGTGTTAAATATCCTGTTGTGTTTGGCAA	chr6R	686259825					0.044091456	0.024164866
PHT	100081994|F|0--57:A>G	TGCAGTGTGTCCTGGGCTCTCACTTCGTGGTTGGGATGCAAGATTTGGATGGCAGGCAGGCAGGCCAGT	chr6R	692478724			0.039749137	0.037444275
PHT	100080151|F|0--58:C>G	TGCAGGCGCAGCTGATGCAGGCCAGGGCGCAGCTGGCGTGCGGGGTCCAGAGCACCGCCTCGCCGGTGA	chr6R	696431303	SECCE6Rv1G0423520.1	LOB domain protein-like			0.022787324	0.1170474
PHT	3596342|F|0--20:C>G	TGCAGTCCCTCCTCATCGGCCTGCTGGCCATGGCGCTCATCCTGGCCTACCGCAACAGCTTCGCGGCGC	chr6R	697233814	SECCE6Rv1G0423710.1	Protein DETOXIFICATION			0.045765318	0.067369082
PHT	100098428|F|0--51:C>G	TGCAGTCACCTGGCCTTGGCCGCCTCTTCCACCGTGAGTCTCTCGTCCGTCCACCACCGCCGTCGCCGC	chr6R	699149438	SECCE6Rv1G0424070.1	Mitochondrial metalloendopeptidase OMA1			0.046186161	0.029328708
PHT	100026165|F|0--58:G>C	TGCAGGAGCAGTTCTTCAAGCAAGCTTGCTTACAGTCATCTTCGCTCAAATTTTCAATGTCATGGCTTT	chr6R	699352850	SECCE6Rv1G0424120.1	Serine/threonine-protein kinase	0.020996389	0.054429478
PHT	100011443|F|0--18:A>G	TGCAGACAACATACATACATCTAGTAAATGAATTCCAAATTAAAAGGATTCAAAGAAATTTGTGCAGTG	chr6R	699399646			0.030646585	0.047671714
PHT	100076476|F|0--27:A>T	TGCAGCGGTTATTTTCGATAAGCATCGAGATGCACAGCCTGCCGCCTCCAAGGTACGCAAGCTCGGTGC	chr6R	699759377			0.02219447	0.039329959
PHT	100003478|F|0--33:G>A	TGCAGCTGAAAGCTGATTAAACCCGTCGTTCCAGCTCGACCCAGTCATTCTTATAAGACAAACTAAATG	chr6R	700925254			0.033447774	0.028065121
PHT	3596685|F|0--40:G>A	TGCAGAACACGAACGATCAATCTAGGTCGGTTGATGGATGGAAATTGGGATAAACGTACGTACGGGAGT	chr6R	708376400					0.049057756	0.052902884
PHT	100019563|F|0--19:G>C	TGCAGCTCGCCGACGCGCTGCACGGCCGAGGCCTCGCCATCACCGTCCTCCACACCACCTTCAACGCCC	chr6R	715609124	SECCE6Rv1G0426720.1	UDP-glycosyltransferase	0.043160781	0.040005689
PHT	100002090|F|0--57:C>T	TGCAGAATACATTGTCTCGAGGTACAATCCCACTTGATTCTCAAACAATCACTGATTCATGAATTGCAG	chr6R	718639073			0.027010939	0.046063104
PHT	100034618|F|0--6:A>G	TGCAGAACGCTCAGCAGAACAGGATGAAGCTCCTGATAGAAAGAGCCGTCATAGACTTATGCAGCAGCA	chr6R	719648729	SECCE6Rv1G0427440.1	Jasmonate O-methyltransferase			0.049048359	0.095987132
PHT	100035325|F|0--38:G>C	TGCAGCAACTAAAATGAACACATAGATGGAGGTTCGCAGATGGCGGGAGCTTCCAGCAGCATAGGCACC	chr6R	719771850	SECCE6Rv1G0427510.1	Embryogenesis transmembrane protein-like			0.042207921	0.056893545
PHT	100058446|F|0--36:T>G	TGCAGGGGAAAGGGTTCACTGACGGTGGAGCGCGTGTTGCCGGCGCCGAAGCCGTTCAAGCTGTGCTAC	chr6R	720649878	SECCE6Rv1G0427760.1	Basic 7S globulin 2			0.034066438	0.026883006
PHT	3900539|F|0--28:C>T	TGCAGCTGGATGAGCAGGACCAACACAACGCAGACGGCAGCAGTTACCTTAAGAGGTGCCATTGGCTGG	chr6R	721375321	SECCE6Rv1G0427850.1	RAS guanyl-releasing protein 1			0.041097215	0.059197959
PHT	4095225|F|0--39:T>G	TGCAGGAGAAGAACCATGACGCCCTCGAGCCGAACCTACTCTTCGTGGAGGTGCCGGACGGGTTAGTGC	chr6R	722279791	SECCE6Rv1G0427940.1	UDP-glycosyltransferase			0.045246273	0.067793919
PHT	3907336|F|0--13:C>G	TGCAGCCGGGCCACGGCGGCCACCATGCTAGCGCCCCCTCCGCACTCCCACCGTCGCTCTCGCTCTCCC	chr6R	722824150					0.049048359	0.096198863
PHT	100069008|F|0--64:T>C	TGCAGTGCATGTGCATGGTCCGATGGATGGCGACGGCGGACGCAAACGTGGCGATGGATGGCGTTTCCC	chr6R	725996328					0.047142815	0.019738319
PHT	3743380|F|0--47:C>G	TGCAGGACACATGCACATCGCGCTTGCATTTGCACTGGTGGTTGGGGCGCCACCTATTGGGCCTCTTAA	chr6R	726262768					0.041286533	0.154657508
PHT	100125467|F|0--36:G>A	TGCAGCTACTGTTGCGCGTGCTGCGGCGGGCCAGGTGGGCCATGCCGCCACTGCCAGAGGCGGCAGCCA	chr6R	727070037					0.049668644	0.052723156
PHT	100022675|F|0--28:G>C	TGCAGTTTATCGATGGTATGTACGTCTGGATCAATCACCGGCAACCTGCCAAAAACATTCTTTTCCGTT	chr6R	728613900					0.039253365	0.064431506
PHT	3743008|F|0--20:A>C	TGCAGTTCCGCGACCTCGACAGGGAGAAGAAGAAGATCGAGATCCAGGTCACGCGCGACGGCTTCCGAG	chr6R	728614475	SECCE6Rv1G0428610.1	Calcium-transporting ATPase			0.049057756	0.039199131
PHT	100056351|F|0--50:G>C	TGCAGAGGCGTCTCGTCCTCGCCGCCCTGGCTCAGCGTCTCCATCAGGTTGCCCCACTCCGTCCGCATC	chr6R	728614838	SECCE6Rv1G0428610.1	Calcium-transporting ATPase			0.02172327	0.0351966
PHT	100067665|F|0--44:A>T	TGCAGCACGCCGTCTCCTATGGATCTGGAGTTTGTGGAGCTGGGAGTTGGAGCGCGCCCGAACCGCGTG	chr6R	728708298					0.020739403	0.041897817
PHT	100020097|F|0--22:C>T	TGCAGTGTCGTCCATTTATCTCCAGACTGAACGGGACACATAAATTCAGTGTCCTTCTTTTCTTCAGTT	chr6R	729785525			0.036383741	0.033205786
PHT	100032136|F|0--31:G>A	TGCAGTCGCAATCAGGTTCTGAATCAATGTTGTTTTGAAAGCAAAGAAACCAGGGAAATCCTATCAGAG	chr6R	729995993			0.048396093	0.045452047
PHT	3742625|F|0--34:A>G	TGCAGCTGCCGCGGCCGGAGAGCATGATGCATATACGACCCTGTCTCTATTTCACGTTTGTAGGTCTAG	chr6R	730283275					0.049201123	0.060347783
PHT	3363098|F|0--8:G>A	TGCAGGACGTGTTCCTCAGGCTCACGTTCGACACCACGACCATGCTGGTCTTAGGCGTTGACCCTGGCT	chr6R	734294335	SECCE6Rv1G0429260.1	Cytochrome P450, putative, expressed			0.043759819	0.049755395
PHT	3349373|F|0--27:A>T	TGCAGCAGGCAGGGCAAGTCCACCTTGACATGTTCGGTGGTCTCTCCTGAAAACGTGCTGTCTTCCAGG	chr6R	734888875					0.026923474	0.149429944
PHT	100077735|F|0--44:G>A	TGCAGGAGAAGAGACGAGAGGGGGCTGGCGGCGCTAGGGTTTGGGTCCCCTTTTAGGTGAACATAAATG	chr6R	737451860					0.042355758	0.078180701
PHT	3595415|F|0--28:T>C	TGCAGCCTAATGGTCCGTCTAATAACACTGAAAGAATCTGATATGGAGTAGGAGCTGTACCTGTCCCAC	chr6R	738923361					0.044091456	0.103163685
PHT	100138868|F|0--8:C>T	TGCAGCTGCTGCGGCGGTGAGGGCCGTCCGCGCGGTGGCGAGGGTCCACATCGTCCTCGGCTTGGTGGC	chr6R	744937623	SECCE6Rv1G0430860.1	glutamate synthase 2			0.03363014	0.185062439
PHT	100073826|F|0--53:T>A	TGCAGACTATCGCTTTCGACGATGAATGGCAGCTCGGTCCATTGGAGGGCTAATGCAACGCCCTCCATG	chr6R	747687535					0.0200629	0.109209712
PHT	100038963|F|0--52:G>A	TGCAGATGAACAGAATTTGATGAAATTCTTTTGCTTATAACAAATTCGAATCGATGAATCATGCAGCTC	chr6R	749996815			0.032445684	0.03780379
PHT	100000152|F|0--45:G>A	TGCAGACCAATAATGGTACGTAGTTTCCTTTCCTCCTCTTGCTAAGTTGAACCCCATGAAAGCTTCCGA	chr6R	752553347					0.039375083	0.045196695
PHT	100095607|F|0--49:T>C	TGCAGGAGAGGATCAGGGAGAGGGTGAACGTGAGGGAAGGCACCTCCTATATGAGGTCGGCCGTGCGGC	chr6R	754007765	SECCE6Rv1G0432710.1	Non specific phospholipase C			0.029921772	0.051163124
PHT	100017302|F|0--7:A>G	TGCAGCGAACTCTCTTGGAAGTTCCTGGCTAGAAGCCTAGCTAGAAAGAGACGGGCACTAATAATGGTA	chr6R	754720351					0.04382519	0.083041446
PHT	100046017|F|0--33:C>G	TGCAGTCGAAGTCGATCAGTCAGCACTCAGCAGCAGAGCATGATTATATATTTTGAATGTAATTAGCAC	chr6R	755147085			0.026424739	0.050108466
PHT	5035437|F|0--10:G>C	TGCAGCTGCTGGTCACCGACTACGCGCCGCACGGCAGCCTGGAGGCGCGGCTCCACAGGAAGGACGGCG	chr6R	756534578	SECCE6Rv1G0433140.1	Receptor protein kinase, putative			0.044091456	0.070533541
PHT	3904731|F|0--44:C>G	TGCAGCTGCGGCGTCCAGTAGTACCCCTTGAGCGGCATCAGGTTCGGGTGCCGCGCCTTGCCCAGCACG	chr6R	756578386	SECCE6Rv1G0433150.1	Receptor protein kinase, putative			0.044091456	0.070533541
PHT	100005511|F|0--14:C>T	TGCAGTTGGGAACACCCAGAGTTGTTCAGAGTCTCTATTGCTCGTCTCTGGTATGCAAACAAGAACCTG	chr6R	759085859					0.049237072	0.014272275
PHT	100016955|F|0--15:G>A	TGCAGTCGAAGCCGCGTCCAAGGTCATTTTTCTACCATCTCACGCGCATCGAGCTTCAGCCTCGTATAA	chr6R	759214451					0.014199536	0.12113656
PHT	100014864|F|0--66:G>A	TGCAGGACCCGAGCTCCCGCTTCATGAAAACCGTGAGCATGTGAGGCAAGAGCTTCACTTTGGAAAGCA	chr6R	761314303	SECCE6Rv1G0433710.1	Fusion glycoprotein F0	0.026939054	0.023587882
PHT	100007848|F|0--47:C>G	TGCAGAGCTTGAGACTCTCAGATGCAGAAAAGAGGAGCATAAAGATTCGAAGGAAACATGGCTGCTCGC	chr6R	761670868					0.041532565	0.081765485
PHT	3907248|F|0--28:T>G	TGCAGTTTGCTAGGCCGTTCTGGATGTCTATATGTTTGGCGGATGGTGACAAGGAGGAGGAGGACTTCT	chr6R	767505803	SECCE6Rv1G0434790.1	Glutathione S-transferase			0.049048359	0.040499069
PHT	3345656|F|0--21:G>T	TGCAGTATAGCGTTCAGGACAGAAACATAGTGTTGAGAAGTTCACAAGAGATGGTACCTTTTGGTCGAT	chr6R	767505806					0.049057756	0.038858447
PHT	100040916|F|0--15:T>A	TGCAGCATGATATTCTCTATCGATCTTATTGGAGTCTATAGGGTAGATCGACGTTGGTTGCATGCATGA	chr6R	772831953					0.04012404	0.034732512
PHT	100026261|F|0--28:C>G	TGCAGGTGGCGGGAGAGCTGGGCGCAACCAAGCTGGTGCTAGAGACGGATTGTGCCAACCTTGCCAAGA	chr6R	775011095					0.034660092	0.037805286
PHT	3733373|F|0--41:G>C	TGCAGCTCGGCGTCGCGGATGGCGACGGCCTTGGCGGCCTCGACCTCGGCGACCTTGGCCTGCCGAGAT	chr6R	778835240	SECCE6Rv1G0436680.1	Flotillin-1			0.049048359	0.043010876
PHT	100195907|F|0--13:C>G	TGCAGGTATTCATCACATGACTCACCACTAGGTGCGGAGCAGGTGTTGGTGGCGTGGTCGTAGTACTGC	chr6R	786417131	SECCE6Rv1G0437910.1	Pathogenesis-related protein 1			0.04382519	0.051546255
PHT	100006753|F|0--44:T>G	TGCAGTGCACTGTACGAGACGGCATCCATCCCTGGTATGTGACCTATCCAGCGCATCCAGTTGACCTTT	chr6R	792917912					0.043759819	0.027885797
PHT	100014367|F|0--60:C>A	TGCAGGATGCTTGTCCTTCCCCGCGATGCACGGTTAGCTGTACTACGTTGATTCCAGTTTCACCCTTGT	chr6R	794354388			0.047923933	0.058094135
PHT	3899189|F|0--29:C>T	TGCAGGGTGTGCCCGTTGTGTCGTGGGGACGTCTGCGAAGGTGTTGCCTCTTGAAGACCTTGGCAGCGG	chr6R	794954507					0.045765318	0.053024854
PHT	3739277|F|0--32:G>T	TGCAGTAATGTGCGTTCCTATAGCTTCCTAGAGCGGTTTTGGGAAGTTTCTATGGGTTGGTTCAGACCG	chr6R	794994735					0.042355758	0.103298072
PHT	3889836|F|0--18:A>G	TGCAGATGGATCCACGGGAGACTGGTCCGCTGGAGCTTTGGAGAAGAACAATGGTGAGGGGTTCGCGAT	chr6R	804282147					0.038315693	0.061150553
PHT	3362075|F|0--64:A>C	TGCAGGGAGCAACTCATTTATGCAGGTTTAATACTCAGTACACACAATTTCTGATTAACAGGAAATGAC	chr6R	805104006					0.032473752	0.081408487
PHT	5226059|F|0--33:A>C	TGCAGGGAGCAACTCATTTATGCAGGTTTAATAATCAGTACACACAATTTCTGATTAACAGCAAATGAC	chr6R	805104006					0.02860321	0.084324017
PHT	3350910|F|0--46:G>A	TGCAGCCATGGCTCCGACATGACCAGGCTACTGCCATTTCCATGTCGTTCCTGGTGCCGCTATCCCTGC	chr6R	806290646					0.049057756	0.082716367
PHT	3342698|F|0--19:T>C	TGCAGTTTTGTTATACTCCTGAACATTGATCATCGCCGTCGAGACGTACCAGGACTCTGATCTTCTTCC	chr6R	808365371					0.041397392	0.059215141
PHT	3734200|F|0--24:C>A	TGCAGGCAGCAGCAACATCTCCTTCAGTTCAACATGGAGCAGAACATTAACAAAACTTCTTCGATCAAG	chr6R	809603532	SECCE6Rv1G0441180.1	Receptor-like kinase			0.049048359	0.04511423
PHT	100030151|F|0--9:C>A	TGCAGCACTCCCAGTTGTTCATGTTTCAGGCATGTCACCGCGGGCTGGTACGTACTATTGGATAAAAGA	chr6R	810088389			0.002187436	0.097014776
PHT	100027003|F|0--56:C>A	TGCAGGTCATGCGTCCAGATCCAGGGCAGCCATCCTGCACACAAAAGAAAATAAACCAAGGAAGGAATC	chr6R	811303121			0.004110653	0.134677944
PHT	100038787|F|0--57:A>G	TGCAGTGGCACGTACAGGTGCTAGTGAGTACGTGCGTATGGCGTGTGGATCCACGATATGAATGATGCT	chr6R	813999610					0.049057756	0.094775915
PHT	100064290|F|0--46:C>T	TGCAGGGATGAGGGGGTGCAACCCTGTGGACACGCCGATGCAGAATCGGCTGAAGCTTGGCAAGACTAG	chr6R	821654725					0.037886564	0.080292528
PHT	100015661|F|0--16:A>G	TGCAGATCATTGCCCGACACTCCTCCACGCCCAGCTCGTGCGACCCCAGCCTGCTCAGTGTCCGCCTCA	chr6R	827208508	SECCE6Rv1G0444210.1	Calcium-binding protein	0.046239681	0.029338752	0.041085719	0.068157777
PHT	100087748|F|0--33:G>A	TGCAGCGATGCCGAGCTGACGCTCAGGTCGCTCGTGTCATGCACAATTCTTCTGAGCTGGAGTGTGCGC	chr6R	827606833	SECCE6Rv1G0444360.1	F-box family protein	0.018704721	0.042899668
PHT	100007479|F|0--67:G>C	TGCAGCGTCACCTTTGTCCAGCAATCATTTGATGCCTCCGTTTCATCCTCTAATCATGCATGGTAGTGG	chr6R	827871320					0.032086606	0.059390816
PHT	100074793|F|0--54:A>C	TGCAGCTCTCCGTGACCGCCGCCGGGCTGCGGAGATCACCTGCCGTGCTCCTACACGCCGAGGCTGCCG	chr6R	830820198	SECCE6Rv1G0444740.1	Adenine nucleotide alpha hydrolases-like superfamily protein			0.017592759	0.098437482
PHT	100021406|F|0--34:T>C	TGCAGTTCTTAATCTCATTAAGCAAGACCTCCTTTATCTCCAACCCACTACTTCTGCTCTGTGGCTCTC	chr6R	835483453					0.0200629	0.056797364
PHT	100004257|F|0--5:A>T	TGCAGACTAAGATGGAAGTGTGTGCATGGCATTGCTGCCAGCGAAATTCACACAGGCCAACGATGTTTG	chr6R	838665321					0.019645645	0.039248828
PHT	3362326|F|0--59:A>T	TGCAGATGCAACGCCCGTACAGAAAATGTAGGAAGCTGTAATTTTGCTAAAGTTTTGTGATGATGGCAT	chr6R	843677435					0.048919181	0.044626899
PHT	5203544|F|0--8:T>C	TGCAGGCATGTACGTATATATACAATACCACATCAGTAACACCCGATTGATCGAGGCAAGATTAAGCCT	chr6R	844288859					0.036408367	0.167802702
PHT	5223182|F|0--11:C>G	TGCAGACCGGACAGCGGCGGTGCTGAAGGAGCTGTGGTGGCCTCTGGTTTGCTGGCGGGAAGCGAGACG	chr6R	845270290	SECCE6Rv1G0446600.1	Transmembrane protein 53			0.032982999	0.074694666
PHT	100050689|F|0--62:C>G	TGCAGCTATGGTGTCATCGATCGCGGAGAGCAAACGGCAGCAGGTTTTATTAGGATGGGCCACAAGATG	chr6R	846469167					0.049668644	0.041683559
PHT	100014513|F|0--6:T>C	TGCAGTTCAGGCGAGATATATATTAATCAACTGCTGTATTGCACAACCTAATTAATTAGAGACTTCACG	chr6R	850609545					0.049048359	0.014778832
PHT	100060337|F|0--47:C>G	TGCAGTGCGTAGTATCCAACCAGGGGGATCACGCGACTCACCAGGTACGCGGATCCACGCAGGGTTGCA	chr6R	853479597			0.003940117	0.085456231	0.049237072	0.073822728
PHT	3906423|F|0--36:C>T	TGCAGCTTACTCTGCTGCGGCTCCTCCTCCACGAAGCTGCTGCGGTAGTCCCCAGAGCGGCGCCTGACG	chr6R	857246942	SECCE6Rv1G0448570.1	U3 small nucleolar RNA-associated protein 18-like protein			0.047199	0.099142209
PHT	100083848|F|0--25:A>T	TGCAGCGACAAGCGTTCTACGACATAATGCAGCTGAGGGATAGACAAGAGAAAGTCGAGAAGGTGCTCA	chr6R	863115207	SECCE6Rv1G0449530.1	Lateral signaling target 2-like protein			0.029971295	0.07463602
PHT	100068852|F|0--35:G>C	TGCAGCTTTTAGTATCATAGTGCTTGAGGGGTGCAGTGCAACGCAGCTTAGCAGCAGGTGAGCCGCAGA	chr6R	863834287			0.021439179	0.041828008
PHT	100072068|F|0--52:G>C	TGCAGCCGCCATTAATCGTGCATGCGACCACGGCTGGGCTCCGATGTGCATGGCACGGCCCAGCACCAC	chr6R	868675562			0.039603394	0.030846085
PHT	100013679|F|0--66:T>C	TGCAGTTCAGTGTGGTGGTGCAGACAGTGAGCACCCAGGGTGCCTCATTGTCACAGATCCCAGCTCTAG	chr6R	883649496					0.032616728	0.08230344
PHT	100008707|F|0--49:A>C	TGCAGGAGACCTTCTCACGAAACAAGTTTGTGACTGATAAATATCCCTGATATAATTAAGTCTCATCGC	chr7R	96013			0.026751799	0.023009234
PHT	100032028|F|0--33:C>T	TGCAGGAAAAAAGAGGCAATTTTATAGAATTTTCTAAAGTTATGACCACTTTTAACTTCCTTTAAACAA	chr7R	1722696					0.047772188	0.039630711
PHT	100019829|F|0--19:T>C	TGCAGTTTCGATCCAAGTCTGTCCGCCATGTAGTCCTGCTAATTGATTCTTGCGTCCACGCCGACCAAA	chr7R	3476754					0.041171818	0.081392537
PHT	100067007|F|0--46:G>T	TGCAGACCCTGGTGGACCACAGCACGAACCCCATGCCCACCCCGAAGATGAGCCCGCCGCCCCGCGGCA	chr7R	4017602	SECCE7Rv1G0454720.1	Protein YIPF	0.04620407	0.041597235
PHT	100014060|F|0--6:T>C	TGCAGCTGCTGGTGTCTGATTCAAACCCTTGTGGTGTTTTCAGGCGCCGATGAGCAGAGGCTGCTGGAA	chr7R	5148273					0.046105317	0.023776729
PHT	100008832|F|0--13:G>A	TGCAGAAATATAAGTTAAACAAGCTTGGGCGACTATGCAAATTACATCCAGAACACTTGAGCATCAAAA	chr7R	11416171			0.007148849	0.090138352
PHT	100012914|F|0--57:T>G	TGCAGCCATATAGAGGACATACATCCATGCAACAAAAATGTTACATGTGCGGGCGGCTGGCCTGCTAGA	chr7R	13578745			0.038701995	0.024150686
PHT	100023268|F|0--43:C>A	TGCAGCAGCCTCCAATATGTTTTCCCACTGGACAACAAGTACCCTCCAGAGATTGCATCCAGTGTCATA	chr7R	13701376					0.041397392	0.063315426
PHT	100113775|F|0--17:C>T	TGCAGCAGTCGGCGTCGCGGGCCTTCATCACGTCGCGCGCCGCCGCGGCAGACGAGACCACCAGCGTCG	chr7R	14324852	SECCE7Rv1G0457110.1	Cytochrome P450			0.034660092	0.093611288
PHT	100009841|F|0--64:G>A	TGCAGCGGGTCGATAGCTACCAGGGGCGCCATCAGGAAAACTAGCAATGGAGTCCAGATGTCTCGAAGT	chr7R	16156719			0.012800269	0.065927505	0.043759819	0.032260168
PHT	100027784|F|0--60:A>G	TGCAGGTGAGAATTCTTGTCCCATCCGTAAATGTCTTGGTTCTTGGGTCGTAGATTCGTAACGTCATCA	chr7R	17613973			0.014230612	0.083242864
PHT	5209297|F|0--44:A>C	TGCAGCATTCTTCGAGGCCGGCAGCGTCGATGATGTCCAGGTGCAATCACGCAAAATACAATATCTTCA	chr7R	19554936					0.046398949	0.097024011
PHT	3600738|F|0--62:G>A	TGCAGGAGCGGGAAGTCCACGGCCAGGTTGGGCGGCAGACGGCAGCGGCCGAAAGAGGCCACGCGAAGT	chr7R	20091449	SECCE7Rv1G0458110.1	paired amphipathic helix Sin3-like protein			0.042355758	0.100411794
PHT	5224562|F|0--25:G>A	TGCAGTTCAAGGCAGATGATAGAATGCAAGCTAAGCAACTCACCTATATTGGTACTCATTTAAATGATT	chr7R	25026466					0.027778173	0.108349483
PHT	100138340|F|0--20:C>G	TGCAGCGCCCACTCCACCACCAGCGCCCTGTCGCTGCCGGCTCCTGCCACCGCCTCCACCGCTTCTCGG	chr7R	25316240	SECCE7Rv1G0459340.1	Glycosyltransferase			0.044091456	0.05338256
PHT	100039646|F|0--8:T>C	TGCAGTTATCAGGTATCACCGCCGATTTGCGCTCGCTGCCCATCATGATCTTGTCCTTAGAATATTCAA	chr7R	26511765	SECCE7Rv1G0459640.1	ATP-dependent zinc metalloprotease FTSH protein			0.036286096	0.09528881
PHT	100032320|F|0--66:A>C	TGCAGTTGGGATTGATTCGACACATAGGAGATGGCAAAAGCAGGCCGTGGCCCGCCCAGCCCTTCAAGA	chr7R	29132845			0.038902878	0.030343743
PHT	100110071|F|0--15:G>A	TGCAGTGCGCGGACGGCCGCCATGGGCTCGCGGCGGAGGAGTCGGGGGAGGAGGCGGCGCAGGCCGTTC	chr7R	31517391					0.043759819	0.082058649
PHT	100049385|F|0--10:C>G	TGCAGCCCTACTTGTTCGATGACGAGCATATGCTGTGGCCAAACTGGGTAATTGATTGATATCAATTCT	chr7R	31964386			0.032673384	0.026494162
PHT	100023708|F|0--16:G>T	TGCAGAGGCTCTACTTGGGTTGCATGAGTGAATTTATTTTCTGCACTTTTCCTCAACTTCAGTAAGTCT	chr7R	32158828			0.03789411	0.024916795	0.049994618	0.026006536
PHT	100010686|F|0--8:T>G	TGCAGGTCTCGCGCTGCGTCGAGGTTCCCGATTTCGAGTTTGCCTTCAATTCGAAGGCGTTCTCGAACA	chr7R	42097925			0.009122943	0.069018295
PHT	100037407|F|0--10:G>C	TGCAGGTGCTGAGCGCGCTGGACGCGGCCAAGACGCAGTGGTACCACTTCACGGCCATCGTCGTCGCCG	chr7R	45292948	SECCE7Rv1G0462370.1	Phosphate transporter protein	0.036045946	0.056750279
PHT	100061556|F|0--17:C>G	TGCAGCCGGAGCGGGCACACGATCCCGAGGGGGCACTTGGTCTTGCGCCCCTTGTACTGCATCACCGTG	chr7R	48853690	SECCE7Rv1G0462830.1	Harpin-induced protein	0.040700108	0.089176181
PHT	100011671|F|0--35:C>A	TGCAGTCGCCTTCTCCAGCATGCTAACACGATACACAGAAGCAGATCCATGTTCATCGCCGCACCCTAC	chr7R	49535264					0.044377285	0.044055993
PHT	100011467|F|0--40:G>C	TGCAGATATCCATAAGAACAGAAACAAAACAAAATGTGATGACGATTCGAAATCCAAATCCGCCCCTAA	chr7R	52559127			0.007148849	0.068844619
PHT	3742250|F|0--62:A>C	TGCAGTTCTACATCCATCTGCTGCGGCATCCGATCCAATCAAATCATGGTAAATTCACTACCACCTCTC	chr7R	62301508					0.042233378	0.072838586
PHT	100019745|F|0--22:C>T	TGCAGAGAGCGACTCAACAGCGCATTGCACCTCCAACCAAATCGAACGGGGCACCTTGACGGAGACATC	chr7R	67027889			0.032673384	0.043460059
PHT	100047913|F|0--49:T>C	TGCAGCGGCACGACAAGAAGGTCCAGTCGGAGCTGCACCAGCTGGTCATTGAGATACTCACGAGTCTCG	chr7R	75356114	SECCE7Rv1G0465900.1	ARM repeat superfamily protein	0.038834093	0.057820631
PHT	100035445|F|0--62:T>C	TGCAGGCTAGAATTGACTTTACATGCTGTGGTTTGCTATATCGGTCGTACATTAATATTTAATATTGGG	chr7R	77513699			0.015578844	0.032129494
PHT	100011960|F|0--59:G>C	TGCAGGTACGCCTCGCACATTTCAAGCACGTGCCTCCCACGTCGGCGGAAATGGTCCCTGACAAACCCC	chr7R	81930789	SECCE7Rv1G0466850.1	Ubiquitin-conjugating enzyme E2			0.049079515	0.034008148
PHT	100036635|F|0--58:A>C	TGCAGATTTCTTGGTGGACGCCATGGACTACGCCATGTCGGGCTTCTGAGGACCATGAACGTTCTTGTG	chr7R	83747070			0.035374297	0.026788343
PHT	5216387|F|0--7:A>G	TGCAGGTAGTGGTCCTCGGAGGAGGCTCGTTCGGAACGGCGATGGCGGCGCAGGTGGCAGCCAAGAAGC	chr7R	87199158	SECCE7Rv1G0467360.1	Glycerol-3-phosphate dehydrogenase [NAD(P)+]			0.041990248	0.074033959
PHT	100009245|F|0--46:C>A	TGCAGAACATAGTCATCCCCACCTTCGACATCAAGCTGCTTCAGCCCACCATCTTCTCCAGATACGACG	chr7R	87206855	SECCE7Rv1G0467370.1	Patatin	0.023565312	0.031416764
PHT	100019124|F|0--46:T>G	TGCAGATTTGAAAAGAATGTTTCATGAATTGTTGAAAAGTTCACAATCCCAAAAGAAAATTCGTGAAAA	chr7R	89887552			0.034906567	0.037972317
PHT	100040874|F|0--8:A>C	TGCAGTGCAGTCTCGCTGTCCTTGGCCTTGATCAGCACGTATATCTTGCCCACGTCAGGGTTCGTCCTC	chr7R	90886165	SECCE7Rv1G0467760.1	Fatty acyl-CoA reductase	0.03789411	0.05561333
PHT	100023598|F|0--44:T>A	TGCAGCGCCAACGTTTAGCAACATGTTCATAATCTTTTCTTACCTCGATCTGAACAAAATCCGAAAGTT	chr7R	92133430			0.034494476	0.037199192
PHT	100019176|F|0--33:A>G	TGCAGTTCTAAGGAAGTATGGTTACCAAACCACACCATTGATCGATATTCTTTCGAGAAGCAGGGACAA	chr7R	96148556	SECCE7Rv1G0468300.1	Exocyst complex component SEC15A	0.045472289	0.023698663
PHT	100048210|F|0--49:T>G	TGCAGAGGCATGGGCACAAGCATGTCCATTACTCCCCATCATGCACGCATACGGACGGATGGCCCTGGC	chr7R	96883969			0.040085234	0.02136875
PHT	100050377|F|0--22:C>G	TGCAGATCACTCGTGCGTGGCTCTTGCGGTGAAAAATCCACGACCCGTCTTTCGCGAGAATGAGTGGTA	chr7R	98175058			0.021462314	0.054750126
PHT	100028052|F|0--20:C>T	TGCAGCAGCTCAAGGGCATGCTGGGGCTGGAGCACTTCACCACCTCCACCGACCTCGTCTCCGTCATGC	chr7R	99353414	SECCE7Rv1G0468550.1	Sulfate transporter	0.042798654	0.025091957
PHT	3363345|F|0--5:T>G	TGCAGTCCCCCGACCTGGTCCTGGCAGAGGATGGTGAGGAAGTCGCTGTCCGTGTGCGGCACCATGCCC	chr7R	105605435	SECCE7Rv1G0469060.1	Gibberellin 2-beta-dioxygenase			0.041532565	0.053571388
PHT	100064589|F|0--47:C>T	TGCAGCACCGACAGCGCCATCAACACCTTCAAGTCCGGCAACGACGTCGTCCCCCTCAACGTCACCGAG	chr7R	105830220	SECCE7Rv1G0469090.1	Blue copper protein	0.008838756	0.049070179	0.045256848	0.020069507
PHT	100036707|F|0--57:G>A	TGCAGAGAGGGGGAAAGCATCTGGATCTCTGTGTCACCGAGGTTTGAAAGGCAGGAGGAATCATGTGGG	chr7R	111809437			0.032621104	0.039011893
PHT	100053036|F|0--16:C>G	TGCAGAGTATTTGCTTCCCTACGCTTCCTTGTGGTGGTACCAATTATTCAGGGTGACATTGTACTGGAA	chr7R	118841496			0.01876209	0.029413575	0.019063377	0.11451877
PHT	100005916|F|0--37:T>C	TGCAGGCTCCCGTTGGAGCAGCGTTCGGTGCATGTAATGTATGTATGCCTGCATCTGCATGCGCCGAGA	chr7R	120955955			0.00165182	0.062498123	0.04641922	0.015634617
PHT	100014228|F|0--53:G>A	TGCAGCTGGAGGCCAAGGAGAGCGAGAACAAGCAGGCGCACATGAAGCTGGAGGCTCTGCGGAAGTCCA	chr7R	131538764	SECCE7Rv1G0471520.1	WEAK movement UNDER BLUE LIGHT-like protein	0.01972379	0.031111661	0.02172327	0.103960395
PHT	100016608|F|0--43:C>G	TGCAGAGGCTGCCTGACAAGTTTACCAGGGTGCTACTAGACGGCAGCAAGCCCCAGGAAGTGAAGCTGC	chr7R	132365776	SECCE7Rv1G0471590.1	B3 domain-containing protein	0.031014803	0.029622866
PHT	100025613|F|0--27:C>T	TGCAGCTGTGTGCAATTAGTTTACTGACCTCATTCAGACTGCAAAATCCATATAGCACCAGATCAACAA	chr7R	133676291			0.026751799	0.04403052	0.032982999	0.132974293
PHT	100014898|F|0--7:T>A	TGCAGAGTTCAGACCGATAACACCAGGAGACGAATGTAAAAAAGAAGCGAGCAATCCGATCGCACGAGA	chr7R	138219174					0.02860321	0.076324151
PHT	100022085|F|0--23:A>G	TGCAGTGCTCACCCCTTTCCTGCAAAGTTTCTAACTCAAAGATACAATCCGCTTACTTTCCTATGCAAC	chr7R	138225339			0.001392055	0.112744183	0.04322127	0.035347368
PHT	100018907|F|0--61:C>T	TGCAGGGAGCAGAATAAAGAGGGAAGCTGTGCACAGTTATGAGAAGAAGAATAATTGCCTACGAGTCAG	chr7R	141144097			0.005242798	0.051466159	0.046549417	0.016088809
PHT	100058625|F|0--45:G>A	TGCAGGAGTCAAAGCCAGAGGGCGAGACCTGGGAGGAGCAGTTGAGGAGCCACACCGACACGCGCCCCC	chr7R	141972010	SECCE7Rv1G0472410.1	Alpha-glucosidase like protein	0.013044575	0.037755951	0.013786461	0.155389337
PHT	100002802|F|0--60:C>A	TGCAGAGCCACAATGGAAACATCATCCTCAAAAAGCCTAGATTCTCACGGTAGCCTAGCTCGCTAGGCC	chr7R	142396232					0.047802064	0.014699876
PHT	100015594|F|0--8:C>T	TGCAGCTCCTGCATCTCCAGCCTGACCTGCTCCAGCATGTCCTGCATCTCAGTCCATTGCTCCGATTCC	chr7R	142432538	SECCE7Rv1G0472440.1	Myosin-related, putative	0.025039569	0.027346815
PHT	100086620|F|0--23:G>A	TGCAGCGATAACTGTGCGCGCACGCAGCGTGGCATCATATGGTTGGTAAAGCAAACGGTACCGCCCGAG	chr7R	143757480			0.019608964	0.029170562
PHT	100021338|F|0--26:C>G	TGCAGGGTGCAAGCGAGCCGATTCGTCCGTCCAATTATTGAACCCATGCCTGGCTGGCCGTAGTCGTCA	chr7R	144443065			0.025039569	0.025247665
PHT	100060857|F|0--37:G>A	TGCAGGGGTTCATTATGGGGAGGGCGACGGCGACGAGGAGGAGCTAGCGCCGTTCCGACCCAGAGCATT	chr7R	167806739			0.030569598	0.021480573	0.046758176	0.03688844
PHT	100015012|F|0--56:A>C	TGCAGTAAACTTCAGAGGTAGATTTCTGTTTAACCGTATCACCTTTCACCATTCTAACACAGTAGTTGC	chr7R	171129880			0.005777256	0.061659954
PHT	100065074|F|0--44:A>G	TGCAGGTTTCAGAGGACGAGCCAGCTTATTACTCCTGGCTGGCGAATCCTAGCTAGCTTGAACCAGACG	chr7R	171267992			0.005719033	0.065230116
PHT	100050196|F|0--55:C>G	TGCAGTTTTTCTTCGCCGAGACAGACATGTGTTCTTTCTCCGCTGGATCGTCTATCCGAAGGAGCCACC	chr7R	172672700			0.020754472	0.053290691
PHT	100036315|F|0--52:C>A	TGCAGCAACGCACGCACCATCTCTCGCTCTCGGTCTTGCACGCGATGCCTCTCTCGGCGGCATCCATCC	chr7R	172737089			0.029507391	0.044159296
PHT	100035485|F|0--44:C>G	TGCAGGGGCAAGGGCATCCAGCTGTGCGCCTACTCGCCGCTGGGCGCCAAGGGCACGCACTGGGGCAGC	chr7R	172994747	SECCE7Rv1G0474560.1	Reductase 1	0.024312595	0.025780928
PHT	100037928|F|0--37:G>A	TGCAGCAAGAAAGACGTGCGTAAGCAAGCATGACGCCGCGCCATTACTGTCGTTGGCGGTTGCGTTCAT	chr7R	177987107			0.007005324	0.087895557
PHT	100045819|F|0--12:A>G	TGCAGCCAATGGAAGCAGCCCAGGGAGAATCATTGACGAAACAACGCGCGGCCAAAGGGACAACCACAA	chr7R	182059911			0.005616156	0.062057571
PHT	100004704|F|0--23:A>G	TGCAGCTACCAATCCGACGCCAGAATATGGTACGACTTCTGCTTCATGCGGTACGACAACACGGACTTC	chr7R	230330132	SECCE7Rv1G0477980.1	Cysteine-rich receptor-kinase-like protein	0.022960147	0.045030779	0.048919181	0.018336056
PHT	100041186|F|0--43:C>A	TGCAGCCACCACCTCCTGCTCCCCGCGCCGAGCGCTCCTCAAGCCCGTGGCCTCCTCCAGCTCCCCGCC	chr7R	231824142	SECCE7Rv1G0478170.1	ATP synthase subunit b	0.029457449	0.03307148
PHT	100056355|F|0--9:A>G	TGCAGAGCAAACGCGCCACCTCGGGGTTGGACAGCGACTTGGGGAGCTCCCGCAGGAAGGCCTGGAGGC	chr7R	259418004	SECCE7Rv1G0479810.1	Ethylene-overproduction protein 1	0.047923933	0.014683586
PHT	100082996|F|0--42:T>C	TGCAGCTGGGCCTGGGCGCGGACGCAGCTGGTCGTACTACTCTCTCTGTTCCAAATTACTCGTCGTGGT	chr7R	272539458			0.021462314	0.040163547
PHT	100051514|F|0--61:T>C	TGCAGGTAGGACCTCGGCGGTTCACAGGACAACCGCATGCGCAGGTGTTGCAGGGAATGACTGAGTCAT	chr7R	276890441	SECCE7Rv1G0480940.1	Protein COBRA, putative	0.012492968	0.078083358
PHT	100056016|F|0--22:T>G	TGCAGTTCCAGGGCAACCTGCCTCAGACCCTTTTCACGGGCAACAGGGTAGAGGCAGAGAACAAGCAGC	chr7R	277468929	SECCE7Rv1G0480990.1	Calmodulin-binding protein, putative, expressed	0.00862336	0.040344169
PHT	3365149|F|0--63:G>A	TGCAGCGGCAAATCTCGTGGCTGCAATACAACGAGATGATGGAAAAGAGCGTCTGCTAGAACAGATAGT	chr7R	278850293	SECCE7Rv1G0481070.1	Long cell-linked locus protein, putative, expressed			0.042290917	0.075339077
PHT	100017681|F|0--29:C>G	TGCAGGATTTCCTGAACATGTTCTTCAGGCAGCAGTACAAGCCGATCCCGCTGGTCTACAACCTTGTGC	chr7R	298657247	SECCE7Rv1G0482040.1	Hexosyltransferase	0.016436592	0.034304809
PHT	100038968|F|0--24:G>A	TGCAGAGCAAGTTCCAGAGCATCTGCTATATATGTGTGTGAGGTGTTGGAATATGTGTATTGACATTTG	chr7R	317151790			0.040063367	0.017056878
PHT	100013861|F|0--47:T>C	TGCAGTTTATGGATTGCAAGCGTTAAACAAACCTTCCTTGCTCTACATATTATCTGCGAAAAATACTGG	chr7R	344683005			0.042798654	0.016054375
PHT	100040120|F|0--25:G>A	TGCAGCAGCCATTTTTTCTTTCGGCGTCGAAGCTGGAGTGCGTTGGCCTCATTCCCTAGGAATGACACT	chr7R	427557271			0.04099678	0.019390728
PHT	100050449|F|0--45:C>T	TGCAGGCGTCATCATCGTTGGCTCCTGCGGAGCAAGGCTTTCTCCCTGAGCAGCCAGAACACTATCACC	chr7R	430793081			0.040307531	0.034595839
PHT	100057763|F|0--51:C>T	TGCAGGACAGGGATAGACGAACAGAGGAAGAGGAGAAGGTGTCGCCCCCCTCAGCGAACAGCAGCACGT	chr7R	495252232					0.048546131	0.040797911
PHT	100037085|F|0--35:G>C	TGCAGTGGTAGGCAGAGGTACACATAACGTGTTTTGGGAGGACAAGTGGCTCAATGATGCTCGCATTGA	chr7R	507854787			0.040349737	0.01661967	0.034066438	0.066538113
PHT	3909759|F|0--64:G>A	TGCAGCACGGCGAGCACGTGGAGACGGTGATGCCAGGGTTCCGTTTCCACCCGACGGAGGAGGAGCTGA	chr7R	564836069	SECCE7Rv1G0493170.1	NAC domain-containing protein			0.049079515	0.084083044
PHT	100126319|F|0--16:C>T	TGCAGGCAGCACTGCACCACCATCACTGGCTGTGCCCCTCGCACACGCCATGGCGGAGTGCAGGAGGCG	chr7R	565886278					0.03163267	0.077645656
PHT	100036594|F|0--52:G>T	TGCAGAATAACTGTTCTTCAATGAATCAGAATATGCGGCAGCAGTCGTGAAAGGGGCATGTTGAATGGA	chr7R	577904674			0.04562555	0.02520968
PHT	100073278|F|0--16:A>G	TGCAGGAGGCGGCGGCACCATCGCCGCCCTCTCTTCCTCGACGGCTGCTGGATTGAAACGCTTCATCCA	chr7R	581448661	SECCE7Rv1G0494330.1	O-glucosyltransferase rumi	0.032345596	0.022060372	0.046945243	0.038841326
PHT	5213244|F|0--16:G>C	TGCAGAGGCATTACATGGAACAGCTCGCGGTCGCACTCCTTGTCGCCAGGAGTAGGTGGAGGTGAAGAA	chr7R	584452059					0.03163267	0.077645656
PHT	100004141|F|0--28:C>T	TGCAGAAGTTGCTGGTATGGATGCCACTCACTTAATCTCATGAGCAGTTTATATGATACGTGCCGAGAT	chr7R	584453371			0.009172473	0.074688753	0.045381764	0.085484766
PHT	100009583|F|0--41:C>A	TGCAGGAAAATGAGGCGCACCAAACTTGACGCCCCCATCGCCTGCCTCACGTAGCTGTCCACCACATGG	chr7R	592341640			0.037082805	0.018494285
PHT	100029564|F|0--58:A>G	TGCAGCACGCACACGGAATTAGAACAAAGCTACACGCAGCATGCTGGAATACAGCGAAAGCGCAAATGT	chr7R	594446987			0.018485296	0.058822048
PHT	100006528|F|0--43:A>G	TGCAGAGGAGGTTGGGCTTGATCCGCTCTTATCCAAGATTGCCAAGAAGTGCTCATAGGAGAAGAAAAG	chr7R	603436337			0.015297881	0.0327557
PHT	100006528|F|0--6:G>C	TGCAGAGGAGGTTGGGCTTGATCCGCTCTTATCCAAGATTGCCAAGAAGTGCTCATAGGAGAAGAAAAG	chr7R	603436337					0.042143874	0.067985608
PHT	100034346|F|0--7:A>G	TGCAGGCAGTAATACAATCAATACATCATAGAAATAGATTCTAGATGCATGCCACAATGTCGAAAAGGA	chr7R	607804143			0.007148849	0.048039589	0.046758176	0.03397449
PHT	100105166|F|0--17:T>A	TGCAGATATCATGCAACTGTTGAAGGAACTAACTGTCATACATTCAGTTAATTTGCGAGTAACATCATA	chr7R	613837960					0.033345266	0.140167528
PHT	100007729|F|0--48:C>T	TGCAGGAGACGGCCGCAGGGCGTGGACACCAAGAACCTGGTGAGGACCCTCAGACGCCTCCTGTCCCCG	chr7R	615565158	SECCE7Rv1G0496710.1	F-box family protein	0.042798654	0.020891549
PHT	100005749|F|0--19:C>T	TGCAGCGCATGTCGTACCTCAACGTGGGCATCTACCCGTTCACGTCCCTCTTCCTCATCATGTACTGCC	chr7R	618459904	SECCE7Rv1G0496920.1	Cellulose synthase family protein	0.017203623	0.028789341
PHT	3583597|F|0--50:C>T	TGCAGCTAGTCCACGCCGCCGCCGCTCGACGGCTGAATCGAGGCTCCAGCCCTAGGTCAGAGGACGCCG	chr7R	622582631					0.035720595	0.132842574
PHT	3890035|F|0--8:A>G	TGCAGTCCAGCGTCTCCCCGCTCGGCATGGGCGGAGGAGGGGCCTTCCAGCACTGGCCGTCCTCCGAGA	chr7R	623305531	SECCE7Rv1G0497330.1	NAC domain protein,			0.034066438	0.140525808
PHT	3897734|F|0--58:C>T	TGCAGGAGTAGGCCCCCTTGTGGAGCCAGGAGTACGCGTCGATGCCGACCTGCGAAGGCGGCGGAGGAG	chr7R	624732218					0.033345266	0.139793818
PHT	5046940|F|0--10:A>G	TGCAGTGCCAAGACCGGCGCCGCGGCGCCAACGGCACCTGCGGCTTCGACCCCGCCACCAGGGACTTCG	chr7R	626611359	SECCE7Rv1G0497530.1	Wall-associated receptor kinase-like protein			0.046751368	0.043856081
PHT	100037382|F|0--30:C>T	TGCAGATATTTCTCCAGTCCAGTACGCGCACATCACACACCAGTCGCCTGCGTGCACCGCCCGCCATTG	chr7R	627864957			0.047187023	0.034546126
PHT	100039588|F|0--24:G>A	TGCAGTGCGCGGACGCAGGTTGTTGTTCCTCGGCAACTCCTCGATTTCCATCCGACCACGATCGATCGC	chr7R	635329386					0.04485499	0.04521205
PHT	100003070|F|0--15:G>C	TGCAGAGGCTTCGCAGCAATTACTACTACCACATGCAGGAAGCAACAAAGGATTTTATCCTATTTATGC	chr7R	639573557			0.019450462	0.027972684
PHT	100017731|F|0--46:A>G	TGCAGGTCCATTCATGTACTACCAAAAAGTTGGTCGTGTCAATGGCACTCTGAAGTAGCCAGAAACATG	chr7R	641007075					0.025483081	0.10985585
PHT	100006499|F|0--26:C>T	TGCAGACCATTGACTTGTTATCATCTCGCTCTTCCAATGCTTGTCATCAGCATGTTGTAACCCCTGACG	chr7R	643140744			0.002187436	0.082771718
PHT	100056042|F|0--40:G>A	TGCAGGTAGAAGAAAAAGTGATACGACACTGTGTGGCCAGGGGGACGAAAGGACAGGGAAGAGATAAGG	chr7R	657058643			0.040531029	0.04000582	0.046479354	0.030713443
PHT	100049927|F|0--25:A>G	TGCAGGTCATGGCATGTCCGAAATGAAATAACCCACCACAAGCTGGCTCCTCCCATAGATACTTCCACG	chr7R	659489311			0.017299202	0.076224326
PHT	100039898|F|0--54:G>A	TGCAGTGTCCTGATCATGCATATATACTGCCAACGGATGCTTGGCTGTTTTTTGGGAAGTATGAGACTT	chr7R	667869850			0.027777741	0.022781286
PHT	100018087|F|0--34:G>T	TGCAGATCCGTGATTCACGATGCTTTCAATACTGGACATGGCGAACTGTTCCATGGAACTGGTGCAGTG	chr7R	673163933			0.03686715	0.068060913
PHT	100032315|F|0--64:G>A	TGCAGAAATATTACGGGCACAGTTTTTGGATAACAAACCACGCACAAAACTGCACATTCAGACGGCCAA	chr7R	674961727			0.006141247	0.050302894
PHT	100067594|F|0--59:G>A	TGCAGGAACAGGGCCGCCGCGGAGGCCTCCTCCGCCGCGGCGCCGAGGAGGCCGTACTTGTCCGAGGCG	chr7R	680149860	SECCE7Rv1G0501170.1	DUF1685 family protein			0.049048359	0.023374268
PHT	100004210|F|0--53:A>G	TGCAGAAATTCTACTACAGATCTACAATGCTGGCTGGACGCTTGCACAAACTTATACCTACGGCAAGGA	chr7R	692374838					0.042233378	0.033510131
PHT	3588774|F|0--41:A>G	TGCAGGCCGATATTCTGCCCTGCGTGCGTAAGCAGTCGTGGAAACCCTAGCTACTGTAGCTGGCTAGTC	chr7R	692381541					0.04485499	0.061918729
PHT	100086442|F|0--64:C>T	TGCAGGACAATGTCGGGTGGGGTGTCAGCTTCGCGATCCCGTCGGCGCTCTTGGTCTTGGCGCTCGCAG	chr7R	696877587	SECCE7Rv1G0502500.1	Peptide transporter	0.047953999	0.037264991
PHT	100061678|F|0--29:C>G	TGCAGGGCGGCGAAGACGCACGACAGCGTCGTGGAGGCCACGAGCGCGACGCTCTCCATGTCCATCCTC	chr7R	697551134	SECCE7Rv1G0502550.1	TSA: Wollemia nobilis Ref_Wollemi_Transcript_14910_3291 transcribed RNA sequence	0.014973313	0.032172283
PHT	100134127|F|0--28:C>T	TGCAGCCCCTCCCCCTCATCTCATTGCCCGTACCCACCCTCCACCTTCCGAATCTCGGACGCCTCCGCG	chr7R	698123039			0.025983375	0.056842387
PHT	100020158|F|0--20:A>G	TGCAGCCTCATGTGCTACAAAATCCACCTTGATTTAAGTATTAGTTTGACCTCTGATGCCCAGGACCAT	chr7R	699467808					0.048436843	0.049913814
PHT	3356201|F|0--26:A>G	TGCAGTCGAGCCTGCTCTACGCGGGCATCGTCCATCGCCCCGCCGCTGACCACGTCGCTCCTTGCGCAC	chr7R	708530048					0.03333058	0.150792135
PHT	100044664|F|0--39:A>C	TGCAGCCCAGTTCGCACGGGCGCACAGCGGCTCAGTCCAATCCAGTCCAATCTGTTCGCTTCGTTCGCC	chr7R	708593819					0.045765318	0.047482738
PHT	100054093|F|0--38:C>T	TGCAGATGGTGCCATTCCACGCTGGGAACATCGACGGGCGCCTACTCGAGCAATTCTCATGCGACGATC	chr7R	718944370	SECCE7Rv1G0504050.1	MADS-box transcription factor family protein	0.012248121	0.040319656
PHT	100048361|F|0--31:T>C	TGCAGTAAGGAAGCTGAAAAGCCGGGGCATGTGCTTTGCCCCTTCTCCAGCATGTGTGTAGGCAGCGGC	chr7R	725291427	SECCE6Rv1G0401490.1	BEACH domain-containing protein	0.047046083	0.028188298	0.04382519	0.026238019
PHT	100022898|F|0--22:G>T	TGCAGAATCAGCCCAATGAATTGCTGTTGAAAATTGTAAATAATTGCCAAACGGTATGTACGAAGTTGC	chr7R	725591353			0.041396117	0.04311524
PHT	100066097|F|0--65:G>A	TGCAGTCGCTGCTCAGCTGGCGCGACCCGAGGGCGTCCTGCCTCTTCGTCTTCTTCTGCCTCATCGCCG	chr7R	728742744	SECCE7Rv1G0504960.1	C2 calcium/lipid-binding and GRAM domain protein	0.046328279	0.0151063
PHT	100035446|F|0--65:T>C	TGCAGGCCTAGCTAAGCACCATGGCTGATAGTGTCATTCAGAAGTTACCTTGGCAGAAATGGAGATTGT	chr7R	729745532			0.024783271	0.064160226
PHT	100015026|F|0--67:A>G	TGCAGAGCAGAGCGCAAGAAACAAACTGGAATACATGATATCGCAAGCCGATGAATTGATAAAAATAAA	chr7R	733008912			0.046239681	0.031416583
PHT	5224468|F|0--62:T>C	TGCAGGCATCTGTAGTCGACCAGCGATGTTTCAGCGAGCTGATGCGCCAACTTCTGAACCTCTAGGTCG	chr7R	749095742	SECCE7Rv1G0506550.1	Cyclin family protein			0.047772188	0.066584554
PHT	100045579|F|0--59:C>T	TGCAGATTGATTGATTGGATTCCAGATGTTTCTTGTGCGAGATCGATCAGCACACGAGACCGTCACTGC	chr7R	758634832			0.022625156	0.05297958
PHT	100045700|F|0--8:C>T	TGCAGGGGCTTGGAGCTCGCCAGGAACTTCCAGTTTCCAGTTCTCAGAGAGGCAGACACCTATACTCAC	chr7R	761006796			0.042798654	0.018375078
PHT	100052058|F|0--51:C>T	TGCAGCTTCTCAGCGACGGTACAGTCGTGCGCTCTGCGGCCTTGCCCTTCCCTGTCGACGGCAACGTCG	chr7R	761586880	SECCE7Rv1G0507400.1	Alpha/beta-Hydrolases superfamily protein			0.043936624	0.031081422
PHT	100080903|F|0--42:A>G	TGCAGGCTAAGCGTCGCGATCAGCCTCCTAGGAGCCTCGTGCAGCGCATCGTCGTCAGCGGATGCGCCA	chr7R	764152084					0.047573937	0.022043199
PHT	3342739|F|0--20:A>C	TGCAGATGCTCGTGCTTCAGACATCCCTAGCATGGCAAGTATGAGCAAAACAAGCATGGTGTCGAACCG	chr7R	766098815					0.043456756	0.087642275
PHT	100016842|F|0--5:A>C	TGCAGAGGTTGCTTGCTTATCCTGGTCGATGTATATGGTAGGAGTAAAGGCTTCCCTGCTCGTGCGCCC	chr7R	766103048			0.020996389	0.06964217
PHT	100028334|F|0--61:C>G	TGCAGCCAAAGTACTTAACGCCAGGCTGGAAAGGCCGTGTGTTTCTACGAGCATGCAGTAGCCCTTGGC	chr7R	769978409			0.032345596	0.044943141
PHT	5046196|F|0--44:C>G	TGCAGCAATGAACAAATCTGCAAAACCAAATTCAGATGTTAATGCTTTAACAAATTGATGGATCGTAGA	chr7R	772150570					0.045601419	0.077605774
PHT	5224517|F|0--15:T>C	TGCAGAAGCACGAGTTCGAGCGGGTCCGCGTCCTCGCCAGGGGCATCGTGAGCGGGTGGCGGGCGTCCG	chr7R	772594725	SECCE7Rv1G0508630.1	Transcription elongation factor (TFIIS) family protein			0.039253365	0.094767605
PHT	100032596|F|0--46:C>G	TGCAGGTTCACAACTACAGGACGGTGCAGAACAATATTCAATTCCCCTTAGGCTAAATATATGGCAAAT	chr7R	789125127			0.007148849	0.091331624
PHT	5202284|F|0--38:C>G	TGCAGCTTCACGCAGGGGCTCTCTGCCGACAGCGTCCCCGGCATGAGGTTCCGCGTGCCGATCTCGACG	chr7R	789944607					0.04572013	0.071010413
PHT	3584483|F|0--16:A>G	TGCAGAGGGTAAGCACAGTGAGGTTGGACAGACTGGTTAGTAGTTGAAGCCAGTTTCTGCGCAGCTCGC	chr7R	803151176	SECCE7Rv1G0511400.1	FBD-associated F-box protein			0.043653989	0.080965383
PHT	100077572|F|0--46:C>T	TGCAGCCGTAGCGCGGACGGAGAGGGCCGACGTGCTTCTTGCCGGCCGTAGGCCGCTCGTGCCGTTCAA	chr7R	803842308					0.047142815	0.068005025
PHT	3742249|F|0--46:T>C	TGCAGGGCGCCATGGGGGCGCTCTCCGTCTCGGCCGCGAGCACCAGTGCCTTCTGGGGCAACCCGCTCG	chr7R	804549076	SECCE7Rv1G0511640.1	50S ribosomal protein L24			0.046549417	0.053557108
PHT	100021343|F|0--49:G>A	TGCAGGATAATGTACAGGGTGGTCAATTATTCTTTCATGATGCAAAGCCGAAGAAATGTGCACACTGAA	chr7R	806468579					0.039375083	0.035386083
PHT	4497021|F|0--25:G>C	TGCAGTGTCATGGGGTTGAGAGGGGGGACAAGCTCGAGATCTTCAACATGTGCTTTCACGACCTACATT	chr7R	807674256					0.041286533	0.058922074
PHT	3597098|F|0--16:C>A	TGCAGCACAAACTCCACAACAAAATCATAAAAACTGCAAATGCACATACATCAAAGAACTGAAACTTGT	chr7R	810407132					0.042355758	0.095703166
PHT	100016854|F|0--40:A>C	TGCAGTTGTATATTCGAAAGAGACCTTCTGTTGCTATATTATTTGACGGGGCCAGAACCAGACAAGAAA	chr7R	816990833					0.032086606	0.108606564
PHT	100125567|F|0--47:G>C	TGCAGAATAAGAGATAGATCAATGGCGTTGACGGCCGCGCTGGGGAGGAGGAGAGCGGAGCAAGATCAG	chr7R	825214488					0.049057756	0.043483315
PHT	100022264|F|0--22:A>G	TGCAGTTACTCCCCTTTGATTAATTAACCAATTTGGCTTGTCTACAATTCGGTGCGAAGCCACTGCTTT	chr7R	835526448					0.042207921	0.034912768
PHT	100022264|F|0--44:C>T	TGCAGTTACTCCCCTTTGATTAATTAACCAATTTGGCTTGTCTACAATTCGGTGCGAAGCCACTGCTTT	chr7R	835526448					0.042355758	0.03755294
PHT	100019797|F|0--31:A>G	TGCAGGCCGAGCGGCTTGCTATATGAGCCGCACGCGGCGGCCGGCCGGCCGGGGCCCTTCGCCGCGCCG	chr7R	842177448					0.049572303	0.070543705
PHT	100005404|F|0--50:G>C	TGCAGACTTGATTTGTTACACAACAAGAGTAGCATAAATAGATCCATGGTGAAATGGAAAGACCACCGA	chr7R	843127958					0.049237072	0.016194943
PHT	100043860|F|0--32:T>C	TGCAGGCAGGGAGGAATGGCACGAATCTGTACTTCCCATCTAGAGACGGTTGCCTCTACGGCTCTACCA	chr7R	845954479			0.023797512	0.02544722
PHT	3739888|F|0--29:C>T	TGCAGCGTACGTGCGAAAGGTTCGATTCACGCTAGCGTCGTCATTTTTGCAGTTTAAAACAGGAAAAGC	chr7R	847658439					0.042207921	0.09025121
PHT	3746247|F|0--52:C>T	TGCAGAGTCTCAATTACTACAAAAGAGAGCTAAACAAACTCAATTTGCACATCAGCCAGTCTCAATTAC	chr7R	849456779					0.043759819	0.091568793
PHT	100083048|F|0--25:C>A	TGCAGCTAGGGATTGGGAAGGAAGGCGATACCTGCTCTGGCTTGTCATGTTCCGCGAGAAACCAGGGGA	chr7R	849920654			0.038217359	0.05050261
PHT	100013120|F|0--42:T>C	TGCAGTTAGCGTCCTGTGGGCCCTATTTGACAGATTGTAATTTAATTGATTAATCGACTCAGTCACTAG	chr7R	851666007					0.047142815	0.060428018
PHT	3363091|F|0--65:T>G	TGCAGGTGGAGCCGCACCGCCTTCTCGATGTGGATGTATGCCTCGTCCACGAACCCCGTCATCTTTGTG	chr7R	854053625	SECCE7Rv1G0517400.1	Aspartic proteinase nepenthesin			0.046601017	0.072322897
PHT	100046347|F|0--32:T>C	TGCAGATGCCGGCCAGATAAGGATCCAAATCGTTGTATTTTATATACAACAGCACAGTAGCTACAGGTC	chr7R	856515454			0.03841834	0.032315922	0.033401628	0.113705887
PHT	100034350|F|0--6:T>G	TGCAGCTTAAAATTACTGCGCACCAAGCAAAAGCTAGCTAGATTGCAGCGCGCCGCACCATGGCGTGGC	chr7R	863167070			0.042010789	0.068853947
PHT	100007540|F|0--22:T>A	TGCAGACCATGCCAGACTACGATAGTCTACGTGCTCTATTTGGTTGGATGCATTCCTACTTCCATACTT	chr7R	864634978	SECCE7Rv1G0519400.1	Disease resistance protein RPM1			0.042355758	0.201136959
PHT	100015646|F|0--47:C>G	TGCAGATGATTAGCTTTGGATAATGCATCTTTTTCTTATAACAATGCCTGCGCGTTGCAGATGATTAGC	chr7R	864642484					0.04322127	0.074978735
PHT	3746052|F|0--30:A>G	TGCAGCGGCATGCTCCCCTCGCGGTGGCGCAACCTCTTGGTCTCGAGCAGTGGCGCCCGTGTGTCATCC	chr7R	869597745					0.049572303	0.141459609
PHT	100016825|F|0--63:G>A	TGCAGCTGCCGTATAAATAGGCTAGCTAGCTTGGCCATGGGATCTTTGCTTCCAAGATACTACGGAGAT	chr7R	878680641					0.025656241	0.083551411
PHT	100012479|F|0--31:A>G	TGCAGATGCTGACAGAGGGGCCATGGGAAGAACACGATGAGGTCGACCTCGAATTCCTGGGGAACAGCT	chr7R	879045008	SECCE7Rv1G0522710.1	Xyloglucan endotransglucosylase/hydrolase	0.014785533	0.032911701
PHT	100123301|F|0--66:A>G	TGCAGCATCTTCCAGTGCCGTGGGAAGAAACGCGGATTCATGCACATGAGCTTCGGGTCCGTGACGACA	chr7R	879352375					0.032115554	0.136794862
PHT	100022695|F|0--27:A>G	TGCAGTTTAGTTTAGGAACTCAATGTGATTGTGGTAGTGCAGCATTCATATCTCGTTCTAGGTGATTGC	chr7R	881056908			0.021287462	0.039110074	0.037848811	0.028197481
PHT	100035802|F|0--50:T>A	TGCAGCTCCCTCATGGCGCTGCTCAGCTCCTGCTGGAGCGACTGGATGCATCCCGCCATCTTCTGCTTC	chr7R	887015404	SECCE7Rv1G0524760.1	WEB family protein	0.045762747	0.017110971
PHT	3581035|F|0--52:T>C	TGCAGGACCTCCTCGGCTTCGACAAGGCCAGCATGACGGTGGAGTGGCTCCTTACGCAGTCCAAGCCGA	chr7R	894113982	SECCE7Rv1G0526150.1	Retarded palea 1 protein			0.042355758	0.08240963
PHT	100041200|F|0--48:T>C	TGCAGATGGGTGCAGCAAGAAGTCCTGCTATGTCATCTGTCCCGAGCTTACGCAGTGTGGATGAAACAA	chr7R	894733839	SECCE7Rv1G0526330.1	Disease resistance protein (NBS-LRR class) family	0.03686715	0.060316628
PHT	3904151|F|0--14:G>A	TGCAGCAGTTGCCCGCGTCGTCCTCATCGTCAATTTCAACCCCACACCCCCTTCCGCTCATACGTGTCG	chrUn	1343738					0.036408367	0.076502994
PHT	3743715|F|0--48:C>G	TGCAGATGCTCTTATATTTCCATGGTTGACCCAACCAACCCACACGGTCAGTCACGCTGCATCGCTCCC	chrUn	3439646					0.049057756	0.040881276
PHT	100067566|F|0--67:C>G	TGCAGGGCAACCGCCTGAACGGCCCCATCCCGGAGACGCTCGCCGACCTGAGGAGCCTCAACGTGCTCA	chrUn	10254839	SECCEUnv1G0530000.1	Receptor protein kinase, putative	0.038852355	0.018673735
PHT	100020905|F|0--28:A>G	TGCAGGTCTTGTCTTTGGGAACCAACATAATGCAAGGAAACTTGCCGAGTTCAGTTGGTAGTCTTGCAA	chrUn	12450501	SECCEUnv1G0553860.1	Receptor-kinase, putative			0.040878927	0.077295874
PHT	100142802|F|0--44:C>G	TGCAGGTCTTGTCTTTGGGAACCAACATGATGCAAGGAAACTTGCCGAGTTCAGTTGGTAGTCTTGCAA	chrUn	12450501	SECCEUnv1G0553860.1	Receptor-kinase, putative			0.043759819	0.073383717
PHT	3742732|F|0--31:G>C	TGCAGCACGCGTCGGACGGCGACGAGGAGTTGCCGATGAAGTAGCTCACGCACGGCGACAGCGAGGCCT	chrUn	13691935	SECCEUnv1G0530550.1	Lipid transfer protein			0.044091456	0.049558237
PHT	100025616|F|0--20:C>T	TGCAGCTCCAGGTACTTGGCCTTCATGCTCTCCAGCTCGAACTTGAGCGTGTTGATGTCCTTCTTGGCC	chrUn	16468347	SECCEUnv1G0531210.1	Phototropic-responsive NPH3 family protein			0.045765318	0.059852997
PHT	100004725|F|0--58:G>A	TGCAGCAGCACTCATCAGTATCTGTAACCAGGATGTACTTATGCAAATGCTCAGCCTCGTGGTATCATC	chrUn	19670717			0.034405987	0.040094251
PHT	100045960|F|0--20:C>T	TGCAGCTCGCGCCCCTGCCTCGCCACAAGAACGGCCATCGTCCGATTCTTTAGCTAAGCTAGACGCTCT	chrUn	32120989			0.038101145	0.03039726
PHT	100036676|F|0--67:G>A	TGCAGGAGGCTGCGCAGCTTCAGCACAAGCCGTCTTTCTCGGAGAGCAGGAGCATCACCAGGCCACTGA	chrUn	32890642	SECCEUnv1G0533780.1	ABC transporter ATP-binding protein	0.047923933	0.022318748
PHT	100033269|F|0--35:T>G	TGCAGAGACGGGTTCAGGGCCAGCCACTCTGCGCATGCATTGATGTATTTTCACCTCAGTCATGACCAG	chrUn	37171664			0.021101505	0.042273423
PHT	100044324|F|0--7:G>T	TGCAGGCGCGCCGGAAGTAGACGTAGGCGTCGAGCTCGTTTGTCGCCAGCAAGCACTGACCGATCTCAA	chrUn	65594109			0.025294554	0.037588627
PHT	3746421|F|0--67:C>T	TGCAGTGACCGGGTTAAATTACACCGCACCACCAGTGTCCAATGCGCGTACTTTACTGGCGTGCTGTCG	chrUn	67137434					0.025656241	0.186729938
PHT	100025210|F|0--61:G>A	TGCAGCCCGTGCGTGCGCGTGGGCGTGCGGGGCTCTGGCACGGCCGCACAGCCACAGCAGGGCATATTG	chrUn	68738420			0.007814382	0.063414254
PHT	100045660|F|0--34:A>G	TGCAGATGAGCTCTTGGCAGGAAAACACCAGCCCATGCAACTGGACGGGCATCATGTGCGCGGCTGTTC	chrUn	71671201	SECCEUnv1G0538200.1	Receptor protein kinase, putative			0.036408367	0.116542489
PHT	100158106|F|0--51:T>A	TGCAGGGACCGAGATGGAGGTGCTAGCGCTCGATTGGCTCGCCCAACTCCTTCGCCTGCCCGCAACATT	chrUn	73082429	SECCEUnv1G0538540.1	Tyrosine decarboxylase			0.04705914	0.042458194
PHT	3597151|F|0--50:T>C	TGCAGCTGCCTTGCTCCACGAGGGCGACGACGATGTCGGTGAAGTTAAACTACGCCATCCTCCTCCTCC	chrUn	75230581					0.049355182	0.058258403
PHT	100039550|F|0--53:C>T	TGCAGCTCCGTCGGCTCCTTTGATCTCTTGGACAGGGGTTTGGCGATGCAGAACGTGTAGATGAAGACG	chrUn	78540628	SECCEUnv1G0540130.1	Protein NRT1/ PTR FAMILY 5.1	0.007148849	0.069150781	0.02172327	0.131725737
PHT	3888966|F|0--9:G>A	TGCAGGCGCGACCATGGCATAGACCTTCTTGCGGAGGAGCTCGACGAGTAGCATCCAGAGGAGGATGAG	chrUn	78771603					0.024526689	0.197984078
PHT	100009310|F|0--60:T>C	TGCAGGGTGATGCAACTGCGAATCCCTGTTGTGGTTTCGAATAGTGGCCTTCAACCTCAATTGAATCAG	chrUn	115262924			0.014519649	0.080138322
PHT	100002552|F|0--65:A>T	TGCAGGAAATTACGAATTAAGAGGTCGATTAAAGTGCCCGCCATTAGCAACAAAATATCTGATATACCT	chrUn	131251523	SECCEUnv1G0544660.1	WRKY transcription factor	0.021462314	0.031869242
PHT	100013709|F|0--33:T>C	TGCAGTTTTATCGTCTCTGAAGATAAGTTGCAGTAAGCAAGCAAATAGGGAGGAGGGGATACCTTCCGT	chrUn	158989759			0.042798654	0.052155159
PHT	100035649|F|0--23:G>T	TGCAGATTCTCAAAAGCTGCTTTGTAAATTTACCCCTTTGGTTCAGCTTATGGCTTTTGGACCCAGAAG	chrUn	160821864					0.045843333	0.074723853
PHT	3742412|F|0--6:G>A	TGCAGGGCCTCAACGTCGTCGACCTGCTGCTCATCACCCAGAGCCTCGACGACCACTGCCACCTGCGCA	chrUn	166525226	SECCEUnv1G0547010.1	Metal-dependent hydrolase			0.046758176	0.075779249
PHT	100118932|F|0--46:C>A	TGCAGGGATGCCGAGCGGATGGCGTCGCCGAGCGAACAGTCGGTCGCCCTGAGCACGCGCAGGAGCGGA	chrUn	179534589			0.018845891	0.029524983
PHT	100001467|F|0--42:G>C	TGCAGATGCCAGCCACCTTATTCTGAATCTATACTGATGTTGGTGATCATGTGCAGGATCGTTGCATTG	chrUn	214478247					0.036271447	0.075761276
PHT	100019497|F|0--30:T>G	TGCAGGATCACCTGCACGGAACCCGTCGAGTGAGAAGGATTCCGTGGTCGACCCGTACTTTGATGAAGC	chrUn	215241953	SECCEUnv1G0550350.1	Non-lysosomal glucosylceramidase			0.030790708	0.084875873
PHT	100021732|F|0--6:C>G	TGCAGTCGACGGCATTCTGCGCGCAATGGCGACGGCGGAGGAGCGGCTGGAATCATCGTCGGCGTTCGG	chrUn	215241956	SECCEUnv1G0550350.1	Non-lysosomal glucosylceramidase			0.032982999	0.074271631
PHT	100006868|F|0--16:A>G	TGCAGCAGCTGCTACTACTACTACTACTGACATTACATGATGTATAGTTTTTCTTGATGGCCTCGGCGC	chrUn	229898520					0.0200629	0.06795156
PHT	3364254|F|0--38:G>A	TGCAGCAAGAAGTTGGAGTAGTTGCTCATTAGGACAGGGCACGACACAGACGAATGCACGCCGGCGCAA	chrUn	253758565					0.046089079	0.051827797
PHT	100011275|F|0--14:C>G	TGCAGCTGGCACGGCCACGGACATGATCCGCGATGAGTGGTGCCTTAACTGGATGCGCGTCCGTCCAGA	chrUn	262033423					0.034066438	0.055664041
PHT	3362204|F|0--43:G>A	TGCAGCAGGGAGAAGATTTACTTTTGTTTTCTTCGGTTGGTCGGTCATTAGTTAGGTACACAGTAGAAG	chrUn	265338555					0.047142815	0.087059805
PHT	100197758|F|0--67:A>G	TGCAGGTCCGTCTCTCCGACAAGGGCAAGGAGCTCGCCATCGCCAAGGATTCTGTCGCGGACTTGGAAT	chrUn	284433516					0.046758176	0.086005199
PHT	3580278|F|0--23:T>C	TGCAGATGTGACACGTATGCCTATGACGATGATGACGACAAAATCTCCTCCAGCTCGGGGTCGAAAGGC	chrUn	293830652	SECCE3Rv1G0211200.1	F-box family protein			0.042233378	0.077936895
PHT	100030003|F|0--58:T>A	TGCAGGAGCCCATCATGGCTATCGTTGCAGACCCACAGTTCATCTTTCTGAGACCGTCTTTGACATGTT	chrUn	300609703					0.030097335	0.0898262
PHT	100051298|F|0--16:T>C	TGCAGCTGCAAGCTCGTCCCCCTCTTCAGAACACCATGCCTCTCCTCCCCATTTTTTTCACCTTGCTCT	chrUn	301621486			0.046878023	0.016679261
PHT	100123329|F|0--39:T>C	TGCAGACAACATACACAGCGGACCGGAGCACGACGATGGTGAGATCGCCGCGCTCTCGCCGTTCGGGCT	chrUn	303470524	SECCEUnv1G0555740.1	Plant/F9H3-4 protein			0.044377285	0.077751191
PHT	5046941|F|0--27:A>G	TGCAGACAACATACACAGCGGACCGGAACACGACGATGGTGAGATCGCCGCGCTCTCGCCGTTCGGGCT	chrUn	303470524	SECCEUnv1G0555740.1	Plant/F9H3-4 protein			0.049572303	0.081751907
PHT	100017573|F|0--53:T>C	TGCAGGGGTCTCCATAAAATCCAGTCCATGGCCGCCACTAATCCAGTCCGTGGTCATGGCGCACCAGTC	chrUn	323563979					0.045256848	0.041731433
PHT	100035192|F|0--65:C>G	TGCAGGCAAATATAGGACCCCATTTAAAAACGAGCTTACTGAATTCTTGGGTATCGCAAATGGACCGTG	chrUn	324827572	SECCEUnv1G0557560.1	F-box protein	0.038101145	0.067117504
PHT	100034367|F|0--15:G>A	TGCAGTTCAAAACTCGCAGAAGAGATTGAAGCACACTACCTACCACTTCCTTGCTGATCTTCATGGTCT	chrUn	328871266					0.040419579	0.046415234
PHT	100001560|F|0--37:G>C	TGCAGAACGAGCTCAATCATGCATGGGCAGAGTTGTCGACTTCTCCCTGCCGCCTGGACCCAAGTGTCC	chrUn	343643731			0.010282289	0.058875847	0.049237072	0.062362565
PHT	100008280|F|0--44:T>A	TGCAGAAGGAGGCCGATCAATATATGTAGTAATTTATCTAGTTCTAGTCTAAACGTCACGTAGAGTCGT	chrUn	360034239			0.018016013	0.072083392
PHT	3736182|F|0--41:A>C	TGCAGCTTTTCAGGCAGTGGTGGTAGCATCTCCATTCTGAGATTCCTCGACCTTGGTTTCCGGCCCATC	chrUn	366032659					0.03163267	0.106930597
PHT	100002051|F|0--58:T>C	TGCAGGCTCATCACACAACTTCCAGCCAAGGTCGAAACCTTTCCATCCTTCAATTCTTTGCAGGGCCGA	chrUn	383981195					0.047563277	0.019231985
PHT	100006972|F|0--15:A>G	TGCAGATGGTGTTTCACCCTTGTACCTAGCCATCTTGCTGGGTAAGAGTACTATTGCATTGATTCTATA	chrUn	385407225	SECCE5Rv1G0346980.1	Ankyrin repeat family protein-like			0.032115554	0.080342927
PHT	100056511|F|0--43:T>A	TGCAGACCGCATACATGTCTACGTCCAGGCGTTTTGTGGAAACTGTTGACCAATAAGCCACGGCGGGCA	chrUn	392386949					0.04187954	0.039190759
PHT	100010612|F|0--34:T>C	TGCAGGCTTAGAATTTGCAGGTACTTTAAGCCTATTAAGAGGCGTGATAAATATAAAATCTCTATTTTT	chrUn	396315357			0.019690117	0.041604238
PHT	3591771|F|0--31:A>T	TGCAGCTCCAACTTAAGCACGTCTCCCGTGAAGGACGGGACGTAGAAGCGGCCGCCCAGGGAGAGGCCG	chrUn	421593174					0.02357791	0.097880921
PHT	100011952|F|0--42:C>A	TGCAGCCGCAGCCTCACTTCGTGTACGTGGCAAGGCAAGACGCTACTCAGGCTAGTCACTTACACTTAC	chrUn	421593177			0.022446902	0.030526799	0.036286096	0.061872793
PHT	100104643|F|0--36:T>G	TGCAGACATCCGCGACGAGCCGGAGCTCCTCGACACTGCGGACCGTCTCGTGGGAGAGCAACTTGCCGA	chrUn	469648900	SECCE3Rv1G0211200.1	F-box family protein			0.044091456	0.076483518
PHT	100003500|F|0--14:G>A	TGCAGCTAGCACCTGAACGATGCTCTTGGCCGAGAAAACCACCACGTACAAACTAGCCAAGCTAACCTC	chrUn	476210290					0.043653989	0.078583172
PHT	100021673|F|0--9:A>G	TGCAGTCTCACCAAGTACTTGAGATTTTGCTCTCATTATGAGAACAGGTTGGGGCTGATTGATAATGGA	chrUn	523354959					0.038858498	0.026757411

## Sheet: suppltable4 GYD
Trait	DArTseqTM SNP ID	Sequence 5'>3'	Lo7 pseudomolecule	Position (bp)	Lo7 cds	Description	Padj 2011	R2 2011	Padj 2012	R2 2012
GYD	100036768|F|0--68:A>C	TGCAGTTGTCCACTATCACCGGCATGGTGTGACAGCCTCGGCGAACACGTAGCTTGCAGAAATCCAAGA	chr1R	302185			0.0408317	0.0479047
GYD	3748277|F|0--36:A>G	TGCAGTCCGCCCGCAAGATCCTCACCGACAAGTTCGACGGCGATTTCACTACCGACGCCAAGGTGGGAA	chr1R	1409572	SECCE1Rv1G0000380.1	Regulator of Vps4 activity in the MVB pathway protein, putative			0.04753372	0.080916419
GYD	100030290|F|0--14:G>C	TGCAGGACAATCCAGAGAGACCAGGTTGCACAAGCGAGGATGAGAAGGAAGGTGCCTTTGATCCACTCG	chr1R	1970937	SECCE1Rv1G0000510.1	WAT1-related protein			0.018210405	0.248492826
GYD	100024482|F|0--44:A>G	TGCAGATCCCAGTTTGGAGATTGCATCCTAGCATTTCTATACTCACCATGGTTTTGTAAACTTGATGCA	chr1R	2116394					0.039645133	0.047233002
GYD	100107681|F|0--16:A>G	TGCAGCTGCTCCTAGCAGCGGCTACAACAGCAGCCACCACGGCGACGACTCCTGGGTGTCGGCCGAGCT	chr1R	2403121	SECCE1Rv1G0001020.1	Receptor-like protein kinase			0.011838457	0.18180432
GYD	100008697|F|0--25:G>T	TGCAGCGATAGCTATATGCACTTTTGGTTGCGTTGGTGCAAAAGCTATTGCTGCTGGCGCACGCATAGC	chr1R	2887340	SECCE1Rv1G0000930.1	Receptor-like protein kinase	0.0215265	0.0584034
GYD	100006644|F|0--25:G>A	TGCAGCAAGGAGCAGCAGCATGGTCGTCAGTGCCATACTCATTTGCTGCATGCTGGCCGTCTCAATGTT	chr1R	3220397					0.031920673	0.058445502
GYD	3362508|F|0--29:C>G	TGCAGCTACCATGGATGGATGGATGGATGCTTGATGATTCTTCTATCTTTCTCCTCTCTGCTCCGAGAT	chr1R	4264699					0.015768498	0.182609563
GYD	100189712|F|0--62:C>G	TGCAGCACGGAGATAGGGTTCGTGTAGTGCATCTTGGGTAGCAGAGGCCGCCCGTACTGTGCCAGTGTG	chr1R	4567072	SECCE1Rv1G0001350.1	C2 calcium/lipid-binding and GRAM domain protein			0.032822582	0.061942123
GYD	100011119|F|0--59:G>T	TGCAGCTATGGTAGGATACATATGTTGCCAAAATTTGAACTTGTGTCACACTGACGGATGTGGATGACA	chr1R	8159496			0.045373	0.0190727	0.017062683	0.040425157
GYD	100170683|F|0--13:C>T	TGCAGGCCCAAGTCGAAACCACAGTTACCATCCTCTTTCGCCACCCGCACGCCCAGACTGAACCTAACT	chr1R	14950713	SECCE1Rv1G0003730.1	Disease resistance protein (TIR-NBS-LRR class) family			0.026148289	0.211524321
GYD	100067961|F|0--19:G>C	TGCAGACGCTGCTCATCCTGCTCCTCAGCCGCGTGCTCGCCCTGCTCCTCCGCCCGCTCCGCCAGCCCA	chr1R	25406282	SECCE1Rv1G0005330.1	Cation/H(+) antiporter	0.046072	0.0145637
GYD	100068910|F|0--32:G>A	TGCAGCATGCGCGTCATGAAACGGAAGGTGCCGTCGTCGATGTATGGGGATAGACGCGCGCTCTCGATG	chr1R	30481619	SECCE1Rv1G0006160.1	3-ketoacyl-CoA synthase	0.0365754	0.0284049
GYD	3745760|F|0--30:G>A	TGCAGCGAGGTGCGGTTGAGGCCGTCGCTCGCAGGTACGGTCAGCGCGGACATAAGGGTTGCACGGAGG	chr1R	31197861					0.04910153	0.078603273
GYD	100028907|F|0--11:C>G	TGCAGAGGCTTCAAACACTTTCAGTTTTCGTCCGATTCATATTTCAAGATCTTCTTCCCCAGCCTCGGT	chr1R	34553372			0.0454971	0.0413818
GYD	100050540|F|0--8:A>G	TGCAGGTCAAAGACATTAGCGTTCCACCACTCTCCGAACATGACGATCTCTTCTTTGTCTGGCTTGGCA	chr1R	34814181	SECCE1Rv1G0006560.1	Laccase			0.036979971	0.036415874
GYD	3362687|F|0--35:T>G	TGCAGCGCCTTGCGCATCGCCATGTTCTCCATCTCTGTCACCTCGAACACATCCTTCAGCTCTGGCAGC	chr1R	37221171	SECCE1Rv1G0006990.1	Phosphatidylinositol N-acetyglucosaminlytransferase subunit P-like protein			0.013622228	0.169136088
GYD	3910090|F|0--26:C>A	TGCAGCTCCAGGAGCTCCGCGTCCATCGCTCCCCCCGCGCCTTCGCTGCCGGCGAGATCCGCTGCTGTG	chr1R	38516488					0.043391976	0.03909895
GYD	3352646|F|0--31:G>A	TGCAGTAGTTTATGTTTGGCTACTCCAAAGTGGTTTGTGTTTGGCTATTCCGTTTGGATGTGCAGATAG	chr1R	38603951					0.037666375	0.048083795
GYD	5037567|F|0--68:G>C	TGCAGCATGTGGAGTGGCCTGTCGTGTCCCTCTCGCTTTTTCTTTCTATCTCTCGCGAGACCCGAGTAG	chr1R	43396289					0.021697858	0.112996399
GYD	100004850|F|0--10:G>T	TGCAGATCGTGGTGATGAACATGCTCATGGGCGCCTCCACCGTCAGCAGCATCCTCTCCACCTACCTCT	chr1R	43827422	SECCE1Rv1G0008040.1	Protein aluminum sensitive 3			0.034670668	0.021478189
GYD	3584357|F|0--46:C>G	TGCAGGAGAGGGTAACACGGTGGTACATGATATCCCTGGCCTCGCGCGCGTCTAAGGGGGTCGGCTCCG	chr1R	45564478	SECCE1Rv1G0008210.1	F-box family protein			0.029891949	0.057430909
GYD	3744486|F|0--24:G>T	TGCAGATCCCCTGGGTCTCCACCCGCACCACGCCCTTCCTGAAGGTGAAGAGCTCCGGCCGGACCAGCG	chr1R	47171926	SECCE1Rv1G0008490.1	Pyrimidine-specific ribonucleoside hydrolase			0.024469221	0.123122282
GYD	100073378|F|0--16:T>C	TGCAGCCCACGGGTCGTGGCCGCCATGACGGCAACAACAAGCGCCTGCCTAGCCCTAGCCGCGCGTCCT	chr1R	50688546	SECCE1Rv1G0008920.1	Grainyhead-like protein 1 homolog	0.0356826	0.0571068
GYD	100034108|F|0--17:T>C	TGCAGCATGGAGGAGCATGTCGTCGTGGAGCCCTTGGCCAGCCAGAGCCCCGCCCCGATGACCGAGATC	chr1R	62073833	SECCE1Rv1G0010420.1	Tetraspanin family protein	0.0327567	0.0666708
GYD	100111550|F|0--7:A>G	TGCAGCGATGGATGAGAGGTCCAGGATGCAGCCGCCGGTGCCTTCGCGGGTGCGAGAGGGAGGGGTGCG	chr1R	66116753	SECCE1Rv1G0010810.1	ATP-dependent zinc metalloprotease FtsH			0.028348509	0.066580972
GYD	3582424|F|0--22:T>C	TGCAGAGGAGAAGGACAAGCAGTCCGTTCCCTACAGCGACGCCCCGTCTCCAGTGCGCGCCGTGCTCAA	chr1R	82768277					0.027482831	0.06886807
GYD	3362842|F|0--14:T>C	TGCAGGGTCTCCTCTGCGTCCTTGTCCTCGTGCCCCTTCACGTACGTGAAGTTCACCGTCGCTCCCTCC	chr1R	86006902	SECCE1Rv1G0012070.1	Dehydrogenase			0.047560365	0.059445495
GYD	3906943|F|0--31:C>A	TGCAGCTCCACGCCGTTGTCGCCGTCGACGGCGAGCTGCTCATACTCGCCGATGTAGTCGAGGTGGACC	chr1R	90593045	SECCE1Rv1G0012250.1	polyadenylate-binding protein 1-B-binding protein			0.025473967	0.065944439
GYD	100076761|F|0--57:C>G	TGCAGGTGCCGCCGTCGCCGCCTTCTTCTTGGCTGCGGGCACCGTCTTCTTCTTCTTCTCGGCAACATC	chr1R	95769899	SECCE1Rv1G0012700.1	F-box family protein			0.035665402	0.15870644
GYD	100030396|F|0--31:A>G	TGCAGTCCCAGTTCTCGATTGGAAGGGGTTCAAAGATGGCTGTTCGCCTTGGGCTCAACAACAAGCTGA	chr1R	115568398	SECCE1Rv1G0014640.1	Translocase of chloroplast 159, chloroplastic			0.047548094	0.01489616
GYD	3364326|F|0--26:C>A	TGCAGTTCATCCCCTAGGGCAAGCAACTATCGGGCGTATGTTACGGTACAGGTACAGGTATCACTTATC	chr1R	118258633					0.046425801	0.056323258
GYD	5221827|F|0--65:A>G	TGCAGCGCCGTGGCCAGCAGCTTGTTGGGGTACTCCTTGAGGAGGCGCACCTGGAGGACGATCCAAAGG	chr1R	120799857	SECCE1Rv1G0015100.1	WAT1-related protein			0.026148289	0.083841343
GYD	3349900|F|0--20:T>C	TGCAGAACTGCTTTGTATACTTTCCCAAACCCCCCAACTCCGACAACCATCTGCTCGTCAAAGTGTTTT	chr1R	132257081	SECCE1Rv1G0015900.1	Receptor-like kinase, putative			0.046626937	0.058487909
GYD	3743046|F|0--66:G>A	TGCAGCATTAGGCACCAAGGTAACTAAGACTGAAACCAGACATTATACATGACAAAGTGCTGAATTGCA	chr1R	136413439					0.042930148	0.044363665
GYD	5215439|F|0--67:A>G	TGCAGGGAGAGGAAGAGGAAGGCGATGACCCACCGGGACTCCATGAGCGGCGGCGAGGTGGAGTGGGAC	chr1R	408500089					0.048517124	0.037534966
GYD	100019812|F|0--58:G>C	TGCAGGCCGCGAGGGGCAAGACGGAGGAGGAGAAGGCGGAGGGGCTGAAGCAGACGCTGGTGGCGGTGG	chr1R	409065253	SECCE1Rv1G0029020.1	Glutathione S-transferase			0.045322613	0.03802719
GYD	100003660|F|0--58:A>G	TGCAGGTAATATCTTTGACCACTGTAATTAAAATGCCTTCTTCAGTCAGTCAATCATAACTGCAATTAA	chr1R	443153221			0.0456338	0.0301095
GYD	100035461|F|0--35:A>G	TGCAGCAGCAGATAGGAAGACGCAGGTAGCAAGCAAGCAGCACATAGCAAATCAGACAGCAATAGCTAG	chr1R	463765618			0.0407668	0.0288631
GYD	100003256|F|0--35:T>C	TGCAGGCTGGAGCACAATCGGTGACGTGCAGTCAATTTCTAGCCACCGTCAGATTTCAATCCAAGGGCT	chr1R	466698830			0.043803	0.0426012
GYD	3742589|F|0--37:C>T	TGCAGGTGTACTGGGGCGAGTTCCCCAAGGAGCGGGTCGACGAGGCCCACCGTGCCGGCGTCAAGGTCT	chr1R	495771431	SECCE1Rv1G0035120.1	L-lactate dehydrogenase			0.046265509	0.03583801
GYD	100022514|F|0--44:G>A	TGCAGAATTGTATATACAAAACTAGAGGAAGGAGACAACATATAGAAGGGAAAGCATTAAGAACTAAGG	chr1R	499434499					0.044120363	0.030157923
GYD	3742912|F|0--28:G>C	TGCAGGGTGTTCAGGGTGAGTTGTCCGCGGTTGAGCGTAAGCTCCAAACTCTGAAAATCGACATCCAAA	chr1R	501305862	SECCE1Rv1G0035760.1	GTPase Der			0.047560365	0.05692045
GYD	100150095|F|0--26:C>T	TGCAGGTAATCTGCAACCAATCGGAGCAACAACGGGCCGCATATCTTGGAAAATAGCGAGCCAGAGATG	chr1R	501339417					0.034227875	0.122864553
GYD	100150096|F|0--55:G>A	TGCAGGTAATCTGCAACCAATCGGAGCAACAACGGGCCGCATATCTTGGAAAATAGCGAGCTAGAGATG	chr1R	501339417					0.030960193	0.122888218
GYD	3355931|F|0--26:T>C	TGCAGCCTCCCCTTCCCGAAGGAAGGTCGTCTCGTCCCACCGTTGTGTCACCGAAGAGAACACATGCAT	chr1R	530926759	SECCE1Rv1G0037790.1	F-box family protein			0.047777123	0.066226913
GYD	3743215|F|0--6:C>T	TGCAGCCCGCTGGCCGGCTTCGTGCCGAGATGGGGCGACGTGAACCCATGGCGCCACGCCGTGGTCCTC	chr1R	533631721					0.047064762	0.045026348
GYD	3742380|F|0--15:C>A	TGCAGGAATTTGTCTCAAAAAAAAGCAGGATGCAGGAAAATGTTGGGGAGAGAGAGGAAGTAATAGGCC	chr1R	539284862					0.035823459	0.195257657
GYD	100015813|F|0--47:A>T	TGCAGCATCTCCACCCAGATAAGACATCTTCCAAACCAGCAGAAAACAGTTTCTCCGCGGTAAAGCAGT	chr1R	539728458					0.049322628	0.031569537
GYD	100113380|F|0--59:T>C	TGCAGCCCCATGAATCACGCCGCGTAAGCAAAACTGGCGGAGTAATGCCCATCCTTCTCTCAACTCCAC	chr1R	542039881					0.034325179	0.0709816
GYD	100148853|F|0--16:C>T	TGCAGCGCATCGGCGTCGGGATGGTGCTCTCGCTCGTGTCGATGGTGGTCGCGGCGCTCGTGGAGACGC	chr1R	543356830	SECCE1Rv1G0038850.1	Protein NRT1/ PTR FAMILY 5.5			0.04413032	0.040138302
GYD	100136466|F|0--58:T>G	TGCAGCCGTTCGGCTCGATATCCAAGCTCGTCATGCTGCGTGGCAAGAATCAGGTGGGTTCTTTTCTTC	chr1R	545634818					0.036520458	0.070090996
GYD	100041621|F|0--7:G>A	TGCAGCGGGACTCGTCATGGAGTCCTAGATTGAGATTGGAACCGCTGATGTATGTGCGCATGATCGGCG	chr1R	546643342					0.049186488	0.015463116
GYD	100018971|F|0--41:C>T	TGCAGCTACTCCGTAGATATTGTCTTAGGCTCTTAGCACGTCAGAAATATGGGCAATGTGGTAAATTGA	chr1R	548308381			0.0408239	0.0400864
GYD	100026389|F|0--33:G>C	TGCAGAGCGCCCTGAATCTCCGTCATGTACTTGGTGTCTTCGTCTAACCATCGGGCGTACTCCATGTCG	chr1R	551134976	SECCE1Rv1G0039640.1	transcription factor-like protein	0.0426057	0.047571
GYD	100035894|F|0--31:C>T	TGCAGTAGGAAGGGTGGTGGATAGGCAAGTGCAAGCTGCAAGATCTGTTCGAGACCAGTTGTGATGTCA	chr1R	555653065					0.046425801	0.02114763
GYD	4096091|F|0--10:C>T	TGCAGATACACACAGAATTATAAATTCAGATTAGGCTCATGCTTACAACAAGACTTTGGTCTTAAAATT	chr1R	557859147					0.043426633	0.046154825
GYD	3743243|F|0--37:A>T	TGCAGTAAGATGTCATATGATTGGCGTAATGACTCGAAGGTGTGTTACTTGGTCTGTGAGGCCCATATG	chr1R	562766795					0.046626937	0.048431171
GYD	100039127|F|0--40:T>A	TGCAGCAGGAATCAATCTATTCGATAATATTTTTCTATTATGCAAAGAACGAAGCAAGAGAACTACTTA	chr1R	562775890					0.04942549	0.020080767
GYD	100080464|F|0--28:G>C	TGCAGCCGACCCTGGCGACCGAGTACGCGAGCCAGGCCGGCCGCTTCACCCTCAACATCACCCGCTCCA	chr1R	565321008	SECCE1Rv1G0040740.1	Fasciclin-like arabinogalactan family protein			0.041722713	0.044980559
GYD	100055296|F|0--48:G>A	TGCAGCACAAAGCACCGAGGCAGACCAGCTTCCCGTTCCTGACATCTCGAGGCTGCCAAGCACTGTTTC	chr1R	575702818	SECCE1Rv1G0042000.1	F-box domain containing protein	0.0397848	0.0495555
GYD	100043599|F|0--28:A>G	TGCAGCCGCGCCCTGCTCTGCACCCTGGACTTGCTGAAGTCCTCGGCCAGGATGTCCACGAGCGCCATG	chr1R	579388632	SECCE1Rv1G0042330.1	Zinc transporter	0.0488362	0.0241172
GYD	100060596|F|0--43:A>C	TGCAGCAGCGCCTGTTTTGTTTCACACAACCCATGTTTGTTCCATACATCCCAAGCCCCGCAGGTAACG	chr1R	594236237			0.0456338	0.0389125
GYD	100011293|F|0--28:A>G	TGCAGAAGTAATTTAGGATGTGACATATATTGATTGCTCAATAGCCAGTAGTAGCTAGTATTTTGTGTA	chr1R	599997707			0.0122572	0.115755
GYD	100016613|F|0--46:G>A	TGCAGTCCGTTTTATGAGAAAATTGCTGACTTTGCCGTTCTCTACCGTAACAGATGCGTACGTGGCCTG	chr1R	611128884			0.0398779	0.0691941
GYD	100025182|F|0--60:T>G	TGCAGCGCCATATGTGAGAAAGGATATTCTGTTTGCTCAAGAAACAGCTGACAATATTGCTGCACTTCT	chr1R	614937551	SECCE1Rv1G0046190.1	Sulfite reductase [NADPH] hemoprotein beta-component			0.044120363	0.063673046
GYD	3585838|F|0--43:C>T	TGCAGCTCGAAGGAATGGAGGCGTTGCAGGACAAGTAGCACTGCGAATAACAGTCTTTGCATGATATCG	chr1R	618257871	SECCE1Rv1G0046540.1	splicing factor PWI domain-containing protein			0.048985633	0.051801196
GYD	100042597|F|0--44:T>A	TGCAGGACATGTTCATAGGTGGCACCGACACGATCTACAAGACGTTAGAATGGACCATGGCCGAGCTCG	chr1R	630248657	SECCE1Rv1G0047910.1	Cytochrome P450	0.0270066	0.0465646
GYD	100101980|F|0--47:G>A	TGCAGACTCCTGAGCTCTGAATCAAAATCTTTCTGCATGGACACGGCGCGGCGGCTGAACTGCTCGTCG	chr1R	635128587	SECCE1Rv1G0048430.1	Protein kinase			0.049186488	0.059343737
GYD	5046222|F|0--7:T>G	TGCAGTCTGGGAAGAGCATCGCCGACGCGGCGGACGAGTGCATCGGGGACGCCAGGCACAGCGACGACT	chr1R	637365502	SECCE1Rv1G0048800.1	Receptor-like protein kinase			0.047640339	0.080262654
GYD	100085450|F|0--19:C>G	TGCAGCTGTTCCGCGCGACCCAGAAGGACTACAGCGAGGCGGCGCGGTGGATCATCGGCCTCATGGCGA	chr1R	664908126	SECCE1Rv1G0052850.1	Kinase family protein			0.034350318	0.022269407
GYD	3730727|F|0--17:T>A	TGCAGATTTCTGCCCGATTCGTTTCAGGCTTTGGTTTGCCCAAATCAGTCAGTGTTGCGAATGATGTAT	chr1R	673532534					0.048924551	0.072780823
GYD	100021719|F|0--20:G>A	TGCAGCTTGAGCGGGCAGACGGCCTCGATCTTGCACTTGGTGTAGCGCGCCGTGTAGCTCACCTTGCGG	chr1R	674027408	SECCE1Rv1G0054310.1	Harpin-induced protein 1 (Hin1), putative	0.0215265	0.0370615
GYD	100044740|F|0--9:T>C	TGCAGCAGGTTCAGTATGCGGCAGCCACACCGAACACACCTTGTGAGGAAGAAGCACATGCACAAAACA	chr1R	678160981	SECCE1Rv1G0055090.1	transmembrane protein, putative (DUF247)	0.0426057	0.0285509
GYD	3896781|F|0--49:G>C	TGCAGAAATCCTTGGAGGACAGCGTTGCATCCCAGGAGCGGCAGACGGAGCGGAAACGCAGAATGGATT	chr1R	679013028					0.036440481	0.056444251
GYD	100080313|F|0--16:C>G	TGCAGGAGGTGGTGCTCGGCTGCACCACCTCCTACGACGGCCAGAGCTTCCAGGCCTCCGACGGCGTGC	chr1R	683302832	SECCE1Rv1G0055840.1	Eukaryotic aspartyl protease family protein	0.0215265	0.0968289
GYD	100104613|F|0--17:A>G	TGCAGACACAAGCTGCCACTACCATTCGCTTCCCGTCTGATCGTCAGCCGCCGCTCGCTCTCTTAGATC	chr1R	689021365					0.012454169	0.186284007
GYD	100104613|F|0--36:C>T	TGCAGACACAAGCTGCCACTACCATTCGCTTCCCGTCTGATCGTCAGCCGCCGCTCGCTCTCTTAGATC	chr1R	689021365					0.009770652	0.192668013
GYD	3883672|F|0--48:G>T	TGCAGCTGGTATTCGTCGATGGCGAGTTTAGCGTGGGTCACGGGACTCGGATCGTGCAGCTGTTACTGG	chr1R	691651211					0.038879974	0.044474701
GYD	3742707|F|0--23:C>T	TGCAGGTCCGACGTCCGTGCCTCCGTGGCACTCCTCCGTCGTCCTGCCTGCATGGCCGCCCAACGCCAA	chr1R	691798562					0.034646133	0.082697244
GYD	5219128|F|0--7:G>C	TGCAGGGGCTAGGGGTGAACCCCGCCGTGCGCGAGGTCGCCGACGAGGCCGAGCTCGCCGCGGCGGTGA	chr1R	692613558	SECCE1Rv1G0057200.1	Glutaredoxin, putative			0.003682333	0.213045774
GYD	100076156|F|0--50:A>C	TGCAGCAAACCCCAGCACCCAATGGCAGTGGACGGCGGACCAAATGCCTCACCAAGAGGCGCCCTCCCT	chr1R	694217688					0.02456655	0.070692683
GYD	3597084|F|0--51:C>T	TGCAGACCCCATTTTTATTTTTTTGTCTATTTCGTGTCTGTTTCACCCCATCCCTGGACCAAAGTTGGT	chr1R	695810215					0.030756877	0.125997055
GYD	100021599|F|0--48:C>A	TGCAGTCTTACCAGAAAAGCAGCAGCGAGCAGTAGTGCAGTACAACAGCCGTATACATTCCACTGTAAC	chr1R	696112467					0.030712155	0.026832468
GYD	100009312|F|0--37:T>A	TGCAGCGCTCAGTTCTCCTAGGCAATCAACATATGGTTTCATGCATCATTCTTTCTGTATCGTTCGTAG	chr1R	697522964					0.048061491	0.020755301
GYD	100077007|F|0--11:C>T	TGCAGATTTCACTAGCTTGCCTGGGTCCTGATGATTCGCTGGTTTCCCAAATGAGCTGGCTCGACGCGC	chr1R	697763682					0.028750246	0.037362675
GYD	100016980|F|0--28:C>A	TGCAGGCTCACCGATACTGTATGCAATGCAGCACAAATTCTCACGTACCGTTCTTGGAACAAAGAGCAC	chr1R	697800542					0.038947759	0.080088682
GYD	100035105|F|0--18:T>C	TGCAGCGTGGAGTTCTACTAACTTACATATAACACAAGACAGGAAGGAGAGAAACAGCAAATAAACATA	chr1R	699188670			0.0473866	0.0228746
GYD	100123640|F|0--28:T>C	TGCAGAGGAGAAGGCCGGCGCAGACCTGTCGGACAGAAATAAGGCGGTACGTTTTGCGCAAGAAAGGGA	chr1R	702089275	SECCE1Rv1G0058860.1	F-box protein			0.039361755	0.051769904
GYD	100080624|F|0--54:C>T	TGCAGAGGAGAAGGCCGGCGCAGACCTGCCAGACAGAAATGAGGCGGTACGTTTCGCGCAAGAAAGGGA	chr1R	702158805	SECCE1Rv1G0058890.1	F-box protein			0.038879974	0.044139154
GYD	3742237|F|0--40:G>C	TGCAGGTGACAGACCTGAAAATGGAATGGAGCACCGCCTTGCCCGTCTTCCTCGCCGCCGCCCTACGCT	chr1R	704441237					0.035136765	0.119887123
GYD	3742237|F|0--68:T>C	TGCAGGTGACAGACCTGAAAATGGAATGGAGCACCGCCTTGCCCGTCTTCCTCGCCGCCGCCCTACGCT	chr1R	704441237					0.032155192	0.091950677
GYD	5040808|F|0--53:C>A	TGCAGCGTGTCGTTCGAGGAGGCCGCCGCTGGGAGCACCCTTGCGTTGACGGCCGGGGAGACGACGCCG	chr1R	708627626	SECCE1Rv1G0060070.1	Plant invertase/pectin methylesterase inhibitor superfamily protein			0.032007565	0.089470718
GYD	5216973|F|0--22:T>C	TGCAGAATGGGGGCGACGGTGATCACACGAGTCTCTGCGACGGCATAAGGCGGTTTGTGTGGGAGGCGG	chr1R	710035193	SECCE1Rv1G0060380.1	Acyl-CoA ligase-like			0.032155192	0.087719395
GYD	100021404|F|0--22:G>T	TGCAGACAGACAGAAACAGGGGGCCTGGCGTCAGTCTTATTTCAGTATTCAATGTAAGTAGCATATACA	chr1R	710411528			0.0355033	0.0332315
GYD	100065669|F|0--61:G>A	TGCAGAAACAATGAAGAAAAAAAGAGACGTGGACTTTGGTGACCCGATCGACACGCGTGAAGTACCTTG	chr1R	710993790					0.039361755	0.053018894
GYD	100016453|F|0--58:C>G	TGCAGCTGTCATACCGAGTATTTGAGATCACAAACGTGCTGAGGGCAGCCTTCATTCCCAGCAGAGACA	chr1R	712137009	SECCE1Rv1G0060760.1	CAS1 domain-containing protein 1			0.04910153	0.039547563
GYD	100011387|F|0--48:T>A	TGCAGGTAGACATTTGATTTTGTACACCTCCATTTCCGCACATGTTTGTCATAACACTTTGGATATGGC	chr1R	712263815					0.0322936	0.044930163
GYD	3578819|F|0--17:C>G	TGCAGCAAAGAAGAAGGCAGAAGACAAGGTAACATTGTCTGGGCTGCTCAATTTTGTTGATGGCTTGTG	chr1R	718456422	SECCE1Rv1G0062120.1	ATP-dependent zinc metalloprotease FtsH			0.048964942	0.043411361
GYD	100064993|F|0--56:T>C	TGCAGAGTTGGACTTGGAGTGCTCCTCATCGTCTTCCTCCCGCTGCTTCAGCTCGATGGTGCAGTCAAT	chr1R	718456425	SECCE1Rv1G0062120.1	ATP-dependent zinc metalloprotease FtsH	0.0215265	0.0694181
GYD	3597619|F|0--52:G>T	TGCAGTGACCTATCTGCATTTCTACGACTGCCCCAAGTTCTCGGTAAGCCCAGGCCTTGTACATACATA	chr1R	722127373					0.032333467	0.063903158
GYD	3743893|F|0--58:G>A	TGCAGATATGTTTGCCTTTCTCGTTGAATGATTTTGCTCTACCATTAGGCGGACCATCGGGGTTCCCCT	chr1R	722990858					0.048800756	0.041094143
GYD	100065404|F|0--50:C>T	TGCAGCACTCCCCTCTGCATCAGCGAGATCCACGAGCATCGGTGCGACGGCGAGACGCCAGTTGCCGAA	chr1R	723201498					0.036907805	0.029699644
GYD	100070377|F|0--10:G>A	TGCAGGTGACGCCGCTCCACCGGCAGCAGTTGTGAGCACCTTGCTGCCATGAGACGAGGCGATTCTCCG	chr1R	724012551					0.044331973	0.05305519
GYD	100075060|F|0--25:A>C	TGCAGAATGCCGTTGTATTCCTTGCAGAACTCGCTCAGTTCAGGATGTATTATCGGACATACGTAAGTG	chr1R	724070928	SECCE1Rv1G0063290.1	Polynucleotidyl transferase ribonuclease H-like superfamily protein			0.018984976	0.08820023
GYD	3593736|F|0--26:C>G	TGCAGGAGCGTCTTCGCCCTCGACTCCCCGCCGCTCTGGGGGCTCGAGTCCGTCTGCGGCCGCCGCCCG	chr1R	724709028	SECCE1Rv1G0063390.1	Protein phosphatase 2C			0.009770652	0.137383397
GYD	100019239|F|0--45:C>T	TGCAGGAGAAACACTCTCCGGTGAGCTCCCTCCGCCACCGCCTCCCGGCTCTGTCGCCGGCGCTCCCAT	chr1R	725005361					0.039705471	0.082440859
GYD	100034161|F|0--55:C>T	TGCAGCGCCTCGACCTCTCCGCCTTGCCCGCGCTCCAGGTGCTCGACCTCTACGACAACGACCTCGCCG	chr1R	726552747	SECCE1Rv1G0063750.1	Non-specific serine/threonine protein kinase			0.044165858	0.017280742
GYD	3744357|F|0--6:G>A	TGCAGAGCAACTACCTTACCGGCCATCTTCCAGAGGACGACAGCATCCCGGCGAAGGAAAGAAACATGC	chr1R	726553665	SECCE1Rv1G0063750.1	Non-specific serine/threonine protein kinase			0.033696927	0.065511778
GYD	3350782|F|0--66:T>C	TGCAGCCCCACGTCGCTGAAAGCCACGGTGAGGAACACCAGGGCCGTGAAGACGGCGCGCATGAAGTCG	chr2R	2572347	SECCE2Rv1G0064270.1	transmembrane protein, putative (DUF679)			0.020744861	0.105153062
GYD	100020936|F|0--25:G>C	TGCAGCTCTTTTCATCCTTGACACAGCTCACTATGCCTATAAGTGGTGAAATGATCGCTACGCCGAGAT	chr2R	5265710					0.034325179	0.060148832
GYD	5047394|F|0--51:T>G	TGCAGATTTGCAGGCAGCAAGAGCACGGATCGTAGCTGGGGTTGGAGCCCCTGAAGAAGCAGGGAGGGA	chr2R	5266110					0.042821004	0.066415724
GYD	3603012|F|0--16:A>C	TGCAGATGGGCTCAGCAGGCGTTCTTGATTCCAAGCAGCATTGTTTCGCGTCGCTACGTCCAAACGCAG	chr2R	11902194					0.011838457	0.196446509
GYD	3598488|F|0--5:T>C	TGCAGTCTAGCGAGCATGTTGCCGGCACAGATCCTGTAGCCGCCACCGAACACCTGGTACGTCCCTGGC	chr2R	13273586	SECCE2Rv1G0066230.1	Cytochrome P450 family protein, expressed			0.011838457	0.145728267
GYD	100008384|F|0--58:A>T	TGCAGCACTTTCCGCATGCATGCAAGCGAATTGATACTCATAATTGGCGGCGAGATCGAATCAGTTCGG	chr2R	13738403					0.030756877	0.033291424
GYD	5218984|F|0--31:A>C	TGCAGCGGCAGGGGAGCCGCGACCCACCCGCAGCGAGCAGCAGCAGCGGCGACGGGTCTCACGGGAGCA	chr2R	14467049					0.017343136	0.240542591
GYD	100112850|F|0--14:T>A	TGCAGTGCAGATACTAAAACGGGGCAGCGAATGGCAGAACACCAAACGATACCAACGCATGCAACTGAT	chr2R	14708449					0.012454169	0.114079178
GYD	3364686|F|0--34:G>C	TGCAGTTCGTGCAGTCGAGCGACGCGGTGGCGCGGGGGCACAACATCTTCTGGGAGGACCCCAAGTACA	chr2R	15022432	SECCE2Rv1G0066670.1	Endo-1,4-beta-xylanase			0.012454169	0.182093943
GYD	100024727|F|0--6:T>G	TGCAGCTGTAGCCGCCGCCAAGATGGGGTCCAAGGTGTCCTCGTCGGCCTCCTCCAAGATCTCACTTTA	chr2R	15855974					0.030189378	0.034564228
GYD	3347644|F|0--58:G>T	TGCAGATACAGTGCAGACAAATTCATTATTCATTTATTCTTGTGTACTAGTTGATGTAGTCTACGCCAA	chr2R	16402825					0.017343136	0.141720635
GYD	3742323|F|0--23:C>G	TGCAGCCGCGACGCCTCGTCGGGCAGCGGGATGTAGATGAGCTGGTCGAGCCGCCCCGGCCGGAGCAGC	chr2R	16519896	SECCE2Rv1G0066970.1	Cell division cycle protein 48			0.026307875	0.137910399
GYD	100017708|F|0--19:C>T	TGCAGCGCTGCTAGCTGCACACAAGCATGCATGCCAGCGTGAACTCAGCCACAGTGCATGGTGACATAT	chr2R	16551235					0.025213359	0.08619014
GYD	100016246|F|0--52:T>A	TGCAGCTGCACCTCCGAACGTACGTGGCAGGCAGCGGCAGCGAAATGCCACCTTGCCATGCATGCCAGG	chr2R	16672770					0.024406046	0.06465462
GYD	3346783|F|0--52:G>T	TGCAGATGGGCGTTTCAGTCGTTCGTCCAGCCACGAGATGACGTGCAAAACCGTGCACACGCAGCACAA	chr2R	16687370					0.019843547	0.077828972
GYD	100126056|F|0--48:A>G	TGCAGGACTTCCTGCCGGTGCTCGGCGTGCTGGACATCGGCGGAGCCAAGCGGCGGGCGGTGCGGCTGT	chr2R	17503655	SECCE2Rv1G0067100.1	Cytochrome P450			0.011838457	0.127183133
GYD	100058431|F|0--44:C>G	TGCAGGTTGGACGCCCCGTGCATCGCGAAGTACTCGCGCACCATCTCCCGGAACCTGGCGGCATCCTCC	chr2R	17575180	SECCE2Rv1G0067100.1	Cytochrome P450	0.0215265	0.102641
GYD	5035109|F|0--13:C>T	TGCAGGACAGCATCCCAAGGGTGTACCTCGCCGCCGCGGCCGCCGCGCTGTACGCGCGCGCGTCGTCGT	chr2R	18835535	SECCE2Rv1G0067430.1	MBOAT (Membrane bound O-acyl transferase) family protein			0.011838457	0.114167464
GYD	5035109|F|0--63:C>T	TGCAGGACAGCATCCCAAGGGTGTACCTCGCCGCCGCGGCCGCCGCGCTGTACGCGCGCGCGTCGTCGT	chr2R	18835535	SECCE2Rv1G0067430.1	MBOAT (Membrane bound O-acyl transferase) family protein			0.012131965	0.112511546
GYD	3908158|F|0--6:A>G	TGCAGCATGGTGAGGCGAGAGAACAAGGTGGTGCCGGCGGCGCCGCCTCGTGTCGACTTGAGGTCGCAG	chr2R	19788321					0.033571901	0.052092438
GYD	5211186|F|0--34:A>T	TGCAGTTCTCGGGCTCCTCCTCGTCGTCTGTGTCAGGGTAGTGTCTCGAGGAGTAAGTATTCTTCTCCG	chr2R	19936852	SECCE2Rv1G0067760.1	F-box family protein			0.019843547	0.086897946
GYD	5138958|F|0--44:T>C	TGCAGCGGCTGGGTAATAACAGCTCTGAAACCTTTGAGGGTCCTTGGCCCATCCCATCTCTGGAAACCG	chr2R	19981868					0.044685142	0.068265668
GYD	3744502|F|0--36:G>A	TGCAGCTGCAAGGAACGGACCAGGCCGGGATGCGACGACCCCTACCGGAAGATGTGGGAAGACATGCAA	chr2R	22117494	SECCE2Rv1G0068080.1	IAA-amino acid hydrolase ILR1			0.027800759	0.133743815
GYD	100140009|F|0--18:C>G	TGCAGGTGGTGCGTGCGGCTACCATGGTGACGTGGAGCAGCCGCCGTTCTCCGCCATGATCACGGCGGG	chr2R	25445589	SECCE2Rv1G0068810.1	Expansin protein			0.047284704	0.058371421
GYD	5207759|F|0--53:A>G	TGCAGCTGCCGCTGCTGCTGCTGGAGCAGGAGCACGGTGTGGTTGAAGGCGCCATCGACGGCGTGGAGG	chr2R	26121087	SECCE2Rv1G0069030.1	Glycosyltransferases			0.036907805	0.070967492
GYD	100099310|F|0--52:C>T	TGCAGGCGCAGGCGGCTGGATGCGCTGCGGCCTCGTCCGCACAGCGATCTCGCCGTCCCCCAAGTGGAC	chr2R	26338297					0.032333467	0.110584794
GYD	100034720|F|0--48:C>T	TGCAGATCTTCTGACTGAAAATGGAGTAAGGAGGTGGTGCATGTCAAACTCAGGAAGCATGCATGCCCG	chr2R	27466875			0.0399807	0.0246589
GYD	100109871|F|0--34:C>G	TGCAGTCGCTGCTGAGCTGGTTGCCGGTGAGGTACGAGTTGTGGCCGGTGTAGATGTAGTAGTGGGAGA	chr2R	27473570	SECCE2Rv1G0069270.1	Phosphoinositide phospholipase C			0.035144443	0.070617027
GYD	100109872|F|0--46:C>G	TGCAGTCGCTGCTGAGCTGGTTGCCGGTGAGGTACGAGTTGTGGCCCGTGTAGATGTAGTAGTGGGAGA	chr2R	27473570	SECCE2Rv1G0069270.1	Phosphoinositide phospholipase C			0.044841481	0.056963813
GYD	3354026|F|0--10:G>T	TGCAGCAACAGACAAAGAAACGGAATCACCACCACGGCCACGGCCAGCGCCAGAAGAAACCAAACTCCG	chr2R	28029312					0.025773635	0.113855546
GYD	100156412|F|0--53:G>A	TGCAGAAGAAGCTGCACCAGGTCCCGCCCCCGTCCCCTCTCTCGCTCCATCCCGTCAGATTTGGGGGAA	chr2R	28029490					0.044607596	0.093342704
GYD	3749376|F|0--17:C>T	TGCAGCATGCTCACTCCCTGTTTCATATCTGCAAGCGTGGGATAGTTGATTGCGTGATTGCGGTGGATG	chr2R	30302485	SECCE2Rv1G0069590.1	transmembrane protein, putative (DUF594)			0.014583169	0.1556364
GYD	100077814|F|0--46:A>G	TGCAGCGGAGGGCCGACGTCGGCGGCGCGTCGTCCGCCATGCCGACATTCGAGGAGGCGTTCGAGCTCT	chr2R	31894854	SECCE2Rv1G0069930.1	Sulfotransferase	0.0321704	0.0780044
GYD	100033248|F|0--26:G>C	TGCAGCTTAGGGACGCTCAAGGGGCTGGAGGTCAACAGGAGCGGGAGCACGATGCTGGGGCTCAAGAAC	chr2R	31901382	SECCE2Rv1G0069940.1	Sulfotransferase			0.02657458	0.143246436
GYD	100033248|F|0--46:G>C	TGCAGCTTAGGGACGCTCAAGGGGCTGGAGGTCAACAGGAGCGGGAGCACGATGCTGGGGCTCAAGAAC	chr2R	31901382	SECCE2Rv1G0069940.1	Sulfotransferase			0.014372832	0.073083052
GYD	100076784|F|0--31:C>A	TGCAGCAGCTGTTCCTCGACGACAACAGCTTCGTCGGGGAGCTGCCGGCGAGCATCGGCGAACTCTCCG	chr2R	34957182	SECCE2Rv1G0070360.1	Receptor-like protein kinase			0.04835036	0.033963449
GYD	3596276|F|0--61:G>A	TGCAGCAGCTGTTCCTCGACGACAACAGCTTCGTCGGGGAGCTGCCGGCGAGCATCGGCGAGCTCTCCG	chr2R	34957182	SECCE2Rv1G0070360.1	Receptor-like protein kinase			0.045827257	0.056715537
GYD	100074261|F|0--27:A>G	TGCAGTATACCCGAGAGGTCAACGGCCATCTGTAAGAGGGGCCTCTTGGGCCTGGCCACGCCCAACGGA	chr2R	35320051					0.046425801	0.040725496
GYD	5207515|F|0--63:C>A	TGCAGGGGATCACCGACTCGTTGTAGAAGGCGGAGAAGGACACGCAGCATTGCGGCGGCTTGGCCGAGA	chr2R	37372006	SECCE2Rv1G0070680.1	Protein COBRA, putative			0.040856281	0.147953514
GYD	100075516|F|0--21:T>G	TGCAGGGGATCACCGACTCGTTGTAGAACGCGGAAAAGGACACGCAGCAGTGGGGCGGCTTGGACGGTT	chr2R	37390385	SECCE2Rv1G0070710.1	Protein COBRA, putative			0.036979971	0.053510379
GYD	3582727|F|0--61:A>G	TGCAGAAGCTACAGCGTTCTCAGCAAGGTGAACTTGGTGGCGCCGGCACCACCGGAGAGGCAGCAGCCG	chr2R	39503100	SECCE2Rv1G0070980.1	BRCT domain-containing protein			0.040399652	0.113237307
GYD	100077703|F|0--42:C>G	TGCAGGCGCCGCCGTTCTGCGAGGACGAGAGCCGCGTCGGTCCCCGCCGTTCCTGGATAAAAGGCCGCA	chr2R	41473992					0.04117572	0.028496873
GYD	3355417|F|0--33:T>C	TGCAGCTTCCTGGAAGCTGCCTGCCGAAACCTTTAAGCATTTATGGTGGCTAATTAATTTCAGTGGTTA	chr2R	45486075					0.012061119	0.175736392
GYD	3742113|F|0--47:T>C	TGCAGCGAAAAAGAAAGAAAGGTCCTCTCCTGGGAATATATAAAGCGTGCCCGCAGTGGTGGTACGCTG	chr2R	47752392					0.035144443	0.050262355
GYD	100005896|F|0--50:T>G	TGCAGGTATGCTTCCATTCAGGAGGTTACTTCCAAGGTCCAAATAGAAGATCCTCTTGCAGTTCTTAAG	chr2R	49659810					0.044051003	0.030517555
GYD	3355564|F|0--37:G>C	TGCAGTTCCATCATCAGAGTCGAACCATGGTGAGCAGGAGAGCAGGGATTACATACAGCGGTGATCGGT	chr2R	54087115					0.049322628	0.051755346
GYD	100060757|F|0--15:G>A	TGCAGCATGCATGGAGTTGCCTCACTGCATACGCACGAGAGGCATGGCGTGAGTTCGGTCACCTTGTGG	chr2R	54374204					0.036907805	0.031357477
GYD	5210175|F|0--54:T>C	TGCAGGAGTCTTCGCCTGGGGCGACCGTGGAGGCCGGGGAGCTGGTGGAGGGGATGATGGACAAGCTGT	chr2R	61817485	SECCE2Rv1G0072840.1	WRKY transcription factor			0.025213359	0.097190467
GYD	3581365|F|0--35:A>G	TGCAGCATCTCCACACGGTCACGAACATCGACCAGATCATCCAAGACCACCGCCGCAGGTGAGCGCCCG	chr2R	61850053	SECCE2Rv1G0072850.1	WRKY transcription factor			0.014882731	0.171441557
GYD	5202538|F|0--16:C>G	TGCAGCATCTCCACACCGTCACGAACATCGACCAGGTCATCCAAGACCACCGCCGCAGGTGAGCGCCCG	chr2R	61872304	SECCE2Rv1G0072860.1	WRKY transcription factor			0.025773635	0.08836532
GYD	100005498|F|0--43:C>T	TGCAGCTAGCTTGAAACCAACTATTACATCATTTCTTAATCAGCTCATTTTGCGATTATTGTAGTAAGT	chr2R	63784017			0.027873	0.0413225	0.039894025	0.022910229
GYD	3596773|F|0--67:G>A	TGCAGATATCCTTCCAAGTAAGTGCAGTTGCGCAGCGTGAGATCTGTGAGCCGCGGGAAAGCAAGGCGC	chr2R	64112652	SECCE2Rv1G0073130.1	F-box protein family			0.047640339	0.051752106
GYD	5215110|F|0--5:G>A	TGCAGGTGCTTGGGCAATACTGAACCAGTCCCTACCACAAGATGATAAGAATATGTAACGGCAGGATTA	chr2R	65073311					0.049145963	0.074192647
GYD	3906362|F|0--14:A>C	TGCAGTGTATTTTTATTAATTTTCAAATAAGTGATACATAAACGTTCTCAAAAGAAACAAAATTGGAGT	chr2R	65178278					0.047543045	0.039832967
GYD	100001461|F|0--35:T>A	TGCAGGCACCTGGCCTATATGGATCACGAGAGGGGTCTGATCTGCCTGCGTGATGTCTGAATGCCCGAG	chr2R	67396103					0.036623299	0.020385241
GYD	100042116|F|0--50:C>G	TGCAGCCACCACCGCGCAACCATGGTAATCTCTTACTCCTCTCCCTCCTCCTCGTGTTCCCCTGCACTC	chr2R	68611623					0.03135653	0.052495071
GYD	3602926|F|0--39:A>G	TGCAGCGTCCCCTTCTCCTCCGCCATTACTTCCGCCGAAAGGAAACGAGAGCTTCTGCTACCAGATCGA	chr2R	70282059					0.039384578	0.051430929
GYD	5219698|F|0--61:G>A	TGCAGGCGATGAGGGGCTGGGTCGTGGACCACAAGCTGCGGGCCGTAGGTGCGCCGCGGGGGGTTCCCC	chr2R	70282062					0.036907805	0.060175522
GYD	3732026|F|0--13:C>T	TGCAGATAGGGGTCGGCTTTGGTGGTTACTGTGGCACCATCTGCGGGAACCAGTTAATTAGTGGAAACA	chr2R	73256115					0.036503487	0.080320023
GYD	100022237|F|0--31:A>G	TGCAGCTAGCTAGTCACCCAGACACACGCGCACACATACGTAGACCAACCGATGCAGTATTAAGTAATG	chr2R	76277813					0.032196491	0.154154242
GYD	100150708|F|0--31:G>C	TGCAGTTTGGTACAACTCCAATTGAAATTGCGGCCCTCCAAAGCAGATGGGATATGGTTGATATGTTAT	chr2R	77237200	SECCE2Rv1G0074510.1	Ankyrin repeat protein-like			0.042787218	0.062720715
GYD	100030443|F|0--60:C>G	TGCAGACATATGACGCTCGAGAAGGTTCAGCAGTCAAGAAAATTTGCTGCATCATACCAACCAATTATC	chr2R	82910990					0.02778709	0.055782502
GYD	3363247|F|0--5:T>C	TGCAGTGCCACCTGGATGGGGTGAAGGCCCAAGGTGCTGTTGAGCCACTCCTCCGTGGTCTGGAACACG	chr2R	97511412	SECCE2Rv1G0077160.1	Magnesium-chelatase subunit H			0.047486813	0.034504065
GYD	3587824|F|0--45:A>G	TGCAGCATTGCAGAACCACTCGTCACATCAGCATCAGAAGCAGCAACAGAGAAGACGCTGGCGATAATT	chr2R	101999882					0.038065129	0.059925405
GYD	5223664|F|0--10:T>G	TGCAGGCGCTTGCCCGGCTGCCCATGGAGAAGCTGCGCTCCCAGTACCACCACAGCCTGCTCCAGGCCG	chr2R	111421290					0.046122165	0.060921126
GYD	5216773|F|0--15:T>C	TGCAGTCACGCCCACTCCCAACTCCGTGCGACTCGCTGGCCTCCTATCCGTGCAGCCGTACTTCGGCGG	chr2R	113398873	SECCE2Rv1G0078950.1	Gibberellin receptor GID1A			0.039894025	0.046568878
GYD	100182968|F|0--33:A>C	TGCAGCCGTACTTCGGCGGCGAGGAGCGCACGGAGGCGGAGCTGAGGCTGGAGGGCGTGGCGCCGAGAT	chr2R	113843444	SECCE2Rv1G0079030.1	Gibberellin receptor GID1A			0.02289351	0.070139696
GYD	100021566|F|0--47:T>C	TGCAGCATCTCCTCCGTTCTCTTCGCGCTGGACTCCATCTCCTCCATTTCCACGTCCATCTTCTTCAGA	chr2R	114404938	SECCE2Rv1G0079060.1	B3 domain-containing protein	0.0372009	0.0403605
GYD	3747009|F|0--24:G>A	TGCAGGAGAGAGAGAGGGGAGGTCGATAGCTCTGGGCCCATACTACATGGGCCTTACTGTTGACTAGCG	chr2R	114727681					0.049730133	0.051867973
GYD	3890109|F|0--40:T>C	TGCAGTTCGTTGGATTTTGTGATGGGGAACTCACTCCAACTGGCCGTGGTTTCACTTGCAGGGGGTCCG	chr2R	119375788					0.04910153	0.067262994
GYD	3346199|F|0--38:G>A	TGCAGCTGCCTTTGCCTTCTCCTGTGGTCTATCTATCTGCTTCCTCGCGTCGCGTGCCGCGCTGCTCCG	chr2R	128334843					0.037107465	0.079357524
GYD	3590013|F|0--25:G>C	TGCAGCAAAAGGCGACCGACCCCTCGGTCCCTTTCTTTCTTACATCGTCTCGTTCGGTGAGGCCGAGGT	chr2R	133652074					0.046861216	0.03681337
GYD	4094323|F|0--37:C>G	TGCAGACGGACATCAACATGGCGCGCCGCGCGCTGCGCGAGGCACTCACCACGCTCGACGACATCAAGC	chr2R	133652738	SECCE2Rv1G0080880.1	Myb factor			0.035665402	0.05039963
GYD	100049603|F|0--23:T>A	TGCAGATTGCTGTCAATGCAACTTTTCGCAACGAAAACGCATTTTCCTTGACGTCTCGTATTCATCACA	chr2R	135482041			0.0382503	0.0499145
GYD	3891720|F|0--18:A>C	TGCAGCAGCACAGCCAACAGAGGAGGAAGACGACCTGATAGCCGAGGCCCTCTACGGGCACAGCGGCCG	chr2R	135482518	SECCE2Rv1G0081060.1	Cell shape-determining protein MreC			0.047769007	0.035435715
GYD	100075983|F|0--68:T>A	TGCAGGAGCGGCCGGCTTTGAAATGTCTGCCTCTCACGAATTATGCTTTCTTTTCCGTCCCACTGTATT	chr2R	138775979					0.024643012	0.06513133
GYD	100106455|F|0--62:G>C	TGCAGCCGCAGGCCAGCAAACAAGAAATCCACCGTACGGCTGCGGCCGGCCCCCACATGGCGGTCAGGA	chr2R	139166777					0.022118936	0.079634671
GYD	100051411|F|0--5:G>A	TGCAGGCACATCACAATTTGATGGGACGTGGTAAGGCCCGTTGTAGGAGTATCGAGAGAAAGTTCTGGT	chr2R	143440752			0.0371677	0.0351259
GYD	100019288|F|0--50:C>T	TGCAGTGTGATGATTTGTGATCGTAGTCATCCTAGCAAGCAGAAACAAAACTGTGATAATAATAATGTA	chr2R	146142358					0.019851493	0.033915043
GYD	100054024|F|0--6:G>A	TGCAGGGGGTCCCGAGCTAGGGTTTTATCCCACACGCGAGCCAGCCCGTATAAGTAGCCCCGTCCCCAA	chr2R	151105849			0.0219194	0.0645092
GYD	3349124|F|0--40:G>T	TGCAGGTGAGCTGGGCAGCTCGTGCATCGATGAAACTTCGGAAGCAAGGCAAACCAGCTTTGGCAGTGG	chr2R	151865278					0.044841481	0.060247465
GYD	100037099|F|0--30:G>A	TGCAGGGCGCGGCTGCTCCTCTGGCAACACGAAACCCGTCGCGCTTGTCCGAGGCCTAAGGATCTCGAC	chr2R	155642495	SECCE2Rv1G0082730.1	Eukaryotic translation initiation factor 3 subunit G	0.037738	0.0280392
GYD	3749947|F|0--25:G>A	TGCAGGTTTGTGCAGTTTGAGGAATGCATTTTGGTTACAACTCATTAGAAGTGAGCCAAACAATTCCCG	chr2R	160637225					0.047679701	0.058366682
GYD	3363836|F|0--47:A>C	TGCAGATAGAGCGGCGTCGGCGCAGCGCCACCCAACCCAACCAGTGGACAGCAACGACCCATCCACCGA	chr2R	161519554					0.040830986	0.044596812
GYD	3745211|F|0--41:C>T	TGCAGGATCGGACGGCACGGAATGGGAAGCGGTTGCGTGGCCTGAGCTGCGGCGTGGAGCGGGCGGGCC	chr2R	161520525					0.048032954	0.034663523
GYD	5047389|F|0--14:G>C	TGCAGCGGGGTGGCGACGAGGAAGACGAACTCGCAGCCCTGGATGGCCGGCTCGAAGGTGGCGGCGTCG	chr2R	171079308	SECCE2Rv1G0083810.1	Dihydroflavonol-4-reductase			0.046425801	0.038907314
GYD	100010641|F|0--5:G>C	TGCAGGAACGGGGTTCCTGAAAGTAAAGCAGACTGCCCACACTTCCGCAGTGCCATGAAGTTAACACAG	chr2R	174843361	SECCE2Rv1G0084420.1	F-box family protein-like protein	0.045373	0.0159642
GYD	100069132|F|0--42:A>G	TGCAGCGGCACAGCTCGACCCAGGGACGCGGGCATTATTACCATAGACGCGCTCGGAGATCTCGAGCAG	chr2R	179456313			0.0392917	0.0324122	0.048517124	0.021407051
GYD	100017315|F|0--49:A>G	TGCAGACCATGATCCTCACGACAGCGGTGCCCCTGGTGGCCATGCAGCTACTGTTCACGGCGTCGGCTG	chr2R	183378117	SECCE2Rv1G0084980.1	Disintegrin and metalloproteinase domain-containing protein 5	0.0299279	0.0349736
GYD	3730751|F|0--21:A>C	TGCAGCCAGCAAAGATGAGTTATTTTTTCCGTGATTATAGCTGTAAGCAGTAATTTTCTTTCAAGTGTT	chr2R	186321728					0.04890562	0.064454872
GYD	100050125|F|0--65:G>A	TGCAGGGTCTTCTTCAGCGAGATGATCTCCTGCTCCAGCGCCTGGATCCTGAAGCTCGCCGTCTCGTAG	chr2R	195177739	SECCE2Rv1G0085670.1	BTB/POZ domain-containing protein	0.0333818	0.04637
GYD	100032677|F|0--47:G>C	TGCAGGCTCCAGATCGAGGAGACTTTTGCAGGAGCAAGAGAGAGAGAGAAACAAAATGGATCACTCCAC	chr2R	235305062					0.037985603	0.086813313
GYD	3745045|F|0--21:G>A	TGCAGCTGTCTTTTCTATTCCGACGTGTTACAACTGCTGTTCCCTACACAGCATCCAAAAAGGAGTCAA	chr2R	337689419					0.034670668	0.110615199
GYD	100050092|F|0--14:C>T	TGCAGAAGTCAGAGCCCGACCTCTACACGGACACTTTCATCGCCGCCCTCATCGCCGTGAGTCTCGCAG	chr2R	460083625			0.0456331	0.034357
GYD	100028671|F|0--30:A>C	TGCAGCAGCAGCACAACACCAACATATCTCAGTGGTATCATGGAAGGAGATGATATAGAATTATAAACC	chr2R	551962647			0.047308	0.0210955
GYD	100149100|F|0--22:C>A	TGCAGCTCGGCGAGACGCCACTCGTCGTGGCGTCCTCCAAGGAGATGGCACGGGAGGTGCTCAAGACGC	chr2R	571244654	SECCE2Rv1G0101900.1	Cytochrome P450 family protein, expressed			0.028760432	0.093019832
GYD	100015589|F|0--25:G>T	TGCAGCTGGTCCTATGGCCATATAAGAGCCAGCCGAGACGAAGGCGAAACAGGGCACAATTAAAGCAAG	chr2R	572604068					0.026148289	0.104752755
GYD	100016410|F|0--26:G>A	TGCAGCATCCGCGCCACCATCAGCGCGATGTGCGTCGTCCCCATGGCCAAGCCCGGGCAGATCCGCCGC	chr2R	574423567	SECCE2Rv1G0102160.1	Cytochrome P450			0.049422859	0.045857061
GYD	100018456|F|0--32:C>T	TGCAGCTCGTCCAGGTCGAACGTGTCCGCCACCGCCGGGTCCACCAGCTCGTGGAGGCGGTAGTCGGTA	chr2R	589132998	SECCE2Rv1G0103320.1	Kinase family protein			0.048811648	0.064836681
GYD	100048853|F|0--10:C>T	TGCAGCGTCACCCGTGCTCTGCAAAGGAATGGCGAGCCCAATGGTGGGGACTCCAATCCGCCTCAACAG	chr2R	608164877			0.0454971	0.0248806
GYD	100024743|F|0--56:C>G	TGCAGTATCTACACACATAGCAAACACGCGCCCAGGTGAGATGGATCGATCGATAGCAGAGCTGGAGCG	chr2R	613593904			0.0254399	0.0738691
GYD	100041706|F|0--21:C>G	TGCAGATGCTCTAATGGAAGTCGTCGTCAACCTATCTATATATGCGATTGCATGCTCGATAGTAGCCAT	chr2R	623367022			0.0392917	0.0522479
GYD	100057885|F|0--13:T>C	TGCAGGCGATTGCTCAAGTGAGGACGGTCTACTCCTACGTGGGGGAGTCCAAGGCCCTGAATTCCTACT	chr2R	624485190	SECCE2Rv1G0105720.1	ABC transporter ATP-binding protein	0.0349731	0.0507463
GYD	100039196|F|0--13:T>G	TGCAGAGAGGCAGTCAGGGGTCTTGGGATCAGATAAAATTACCTTTCCCCTTCCCCAGCCTCTTTCGTG	chr2R	653224475			0.0456338	0.0315403
GYD	100039196|F|0--58:C>T	TGCAGAGAGGCAGTCAGGGGTCTTGGGATCAGATAAAATTACCTTTCCCCTTCCCCAGCCTCTTTCGTG	chr2R	653224475			0.0407668	0.048862
GYD	100082658|F|0--11:G>A	TGCAGAACAGAGGCCTCACCTGGTATGCCTCTACTACTCCATATAACTTTGAACCACTGGCTCTCAGGG	chr2R	654302943	SECCE2Rv1G0107770.1	Glycosyl hydrolase family 5 protein			0.033571901	0.131886474
GYD	3745325|F|0--28:C>T	TGCAGGACAGCACTACATTAAACGTCAGCCACTGGTTCCCATGGCGAGAGGCACTGGATATTAGTCAGA	chr2R	664858748					0.039894025	0.105317934
GYD	100011239|F|0--7:C>T	TGCAGGTCATTGCAGCGGCATAGGCACTAGGCGTTGACCTGCCCGCGATCGAGCTGGGACAAAGCGAAA	chr2R	667897908					0.047640339	0.088187566
GYD	100067474|F|0--37:T>C	TGCAGACGCTCATGGACAAGGGCTGCGACGTCAACGCTAGGGCGGAGGCTGGCGATGTCGCCGTCATCC	chr2R	668471272	SECCE2Rv1G0108820.1	Ankyrin repeat	0.0492557	0.0392668
GYD	100034901|F|0--42:A>G	TGCAGCTGCACCTGCATGCCTCCCCCGTGGATTTCTTTACCTAAGGCGTGCCTGCAACCGCCCCAGTCC	chr2R	686058299					0.047637889	0.016495817
GYD	100003936|F|0--32:G>T	TGCAGGGTGGCCACCCAGGTGCTCCACTTGTAGTCGTAGTACCTGTTCACCTGGTCCGACAGCCCGAGA	chr2R	689854646	SECCE2Rv1G0110460.1	transmembrane protein, putative (DUF247)			0.033684151	0.084214742
GYD	3360445|F|0--66:T>C	TGCAGCAAGCTCCCAATCAATCAATCAATCAATCAATAATTGTCCTGCTGTTTCAGATCTTTGCTCTCC	chr2R	703121133					0.030540731	0.078909578
GYD	100075742|F|0--40:G>A	TGCAGATAAGTGAATCCGAAGCTGAGGTTGAAGCAAGGCTGGCTGAGATTGAGGAAGCTGCAAATATCA	chr2R	704686086	SECCE2Rv1G0111880.1	Sugar transporter, putative			0.032670477	0.074358793
GYD	3592161|F|0--21:A>T	TGCAGAGATTATAGTCCCTTGACAGGAAAACTCCATGGTGTTCAGAACATTAAACTCTTGGAAACCCAC	chr2R	705838242					0.035051987	0.063580645
GYD	100014173|F|0--36:T>C	TGCAGAATCATGAAGAGACATATGTTCAGTGTCTAATTCGCAACTGAAGCTACAAATGAACAGGAAAGA	chr2R	707352761					0.044841481	0.051274282
GYD	100027412|F|0--21:A>C	TGCAGGCTGCATCATGTCGTGACTTTACGTAGTAGGAGTACGTATATATACTCTTTTTTACTCCCCAAG	chr2R	730733089			0.049839	0.0742507
GYD	100036502|F|0--66:T>C	TGCAGCTTGCACCAGTTAATCCTTACCTGAGCAGATCATAATGTAGAGGTCGATGTCCATTCTATATCT	chr2R	738355933					0.033571901	0.189587082
GYD	100013672|F|0--59:A>C	TGCAGTGTGTTTCCAGCCATCATCAGAATCCTACTTGAAAGTGAGATTGTGAGAAGGTAAGACGAGAGA	chr2R	739815286			0.0421411	0.0331653
GYD	100007751|F|0--21:T>C	TGCAGTGGCCCGCTGAAACGATAACTTAGGTCGGTGATTTTGATGGAGAAGAACTGTATGGAGCTCTCC	chr2R	746945678	SECCE2Rv1G0115170.1	CsAtPR5	0.049577	0.0178387	0.038879974	0.084109631
GYD	100006331|F|0--5:C>T	TGCAGCAACATAAACACAATCTGAGGTTTCGGGAGGAAAAAGCTCATGTTTGAAATGCCTGTGAAAATT	chr2R	749073800			0.0219194	0.051434
GYD	100130402|F|0--34:G>C	TGCAGGCAGCGATCGGGCTGCGCGTACGTACCGTGAATGTTTTTTCTAAGGCGAGTACGTGAGCCGTGG	chr2R	751875272			0.0369951	0.0319584
GYD	100033907|F|0--17:A>T	TGCAGGACTGCATATTTATTTGGGGTAGAGGACTGTATTAATACTGACACGGCTTATGCAATGGTCTGT	chr2R	755714411			0.0454971	0.0318183
GYD	100009159|F|0--29:C>G	TGCAGAAAGCTTCGCTTGATCACATCTGCCCCAACTTGCACGCCATTATTTAGAAGCCTCTGGACACCA	chr2R	757398465			0.0488898	0.030549
GYD	100035295|F|0--34:A>G	TGCAGTATATGCACGTACACCTCTCAGGAAAAAAAATGTTTATACACGTACACTTTGTGCAGTGAGAGA	chr2R	762384610			0.0356856	0.0499041
GYD	100023902|F|0--12:C>T	TGCAGGTCCATTCCAGTTCGTCCCAGAGCCCTACAACGGCACCATACCGCGCCTGCAAATCAACCCCTA	chr2R	768675667	SECCE2Rv1G0116930.1	Serine carboxypeptidase family protein, expressed	0.0372009	0.0496997
GYD	100021607|F|0--8:G>A	TGCAGCTTGCGGAAGTGCGAAATCTAGGAGCAGAGACCCTTCTTGCCGCCGCCGCTGGTTCTTGGCTAT	chr2R	773288461			0.045373	0.0344418
GYD	100015396|F|0--60:G>T	TGCAGCTGCCCCGCTCCTTCCGTTTCTAGCTAGCCCACCATCAACTTGGATCTTGGCTACGCCCATGTC	chr2R	775215800			0.0454971	0.0368659
GYD	100014056|F|0--10:A>G	TGCAGAAGCTAGTGTACAGCATGTGCTTCGTGTTCGCGCGCTGCACCAAGCCGGTGTCGCTGACGGCGC	chr2R	776187421					0.039369978	0.069393978
GYD	100019327|F|0--20:G>C	TGCAGCTGCGGCGAGAGCTTGAGAGCCGTCATGGAGGACTCGGCGTCCTGGCCGTAGATCTGGTCGCCG	chr2R	779073227	SECCE2Rv1G0118050.1	MADS-box transcription factor	0.0372009	0.0248848
GYD	5218362|F|0--21:C>T	TGCAGGCAGAGGCGGCCACCGCTCACGGTGCGCGGGCGAGCGGCGAGGAAGCAAGGCCGTGGGAGAGCC	chr2R	785897247	SECCE2Rv1G0118830.1	Cold-responsive protein WCOR15			0.042787218	0.060248613
GYD	5220564|F|0--19:T>G	TGCAGCTGATTCACAACAATGAAGTTGTGTGATTTAAGAAATGGCAAAAGGACATGACTAAGTACCAGC	chr2R	798046535					0.038879974	0.148779876
GYD	3742998|F|0--11:G>A	TGCAGAGAGGAGCAAAGGAGGGAGCAAAGGAGGCAGGGGCAGCGATGCAAGCCATGCCGCAAGCAATCT	chr2R	798048792					0.049186488	0.039547227
GYD	5212738|F|0--31:G>C	TGCAGGCGCACAACGACGCGCGCCGCGAGGTGGGCGTGGCGCCCCTGAAGTGGAACTCGACGCTGGAGC	chr2R	798583788	SECCE2Rv1G0120400.1	Pathogenesis-related protein 1			0.046500394	0.086773677
GYD	100043186|F|0--5:T>C	TGCAGTCCGACGCCACGGGGAGAATCAAGCGAGCCCATGCCTCCAAACATGCTGGCCAACGAGGCATTT	chr2R	817366704	SECCE2Rv1G0122580.1	U-box domain-containing protein	0.0454971	0.0377076
GYD	100020110|F|0--62:G>A	TGCAGCAGCAGCAGCCTGTATCGGTGACGAACCCTCAACATGTATAGGTTAGAGACGGACGGGCCGAAG	chr2R	818353692					0.047583099	0.035761266
GYD	100026837|F|0--13:G>C	TGCAGTTCCCCTGGATGTTATAATTGACGTAAAAATGGGCTGAATTAGGCAGCAAGTCTAATAAATCGT	chr2R	829216557			0.0382503	0.0488178
GYD	3595685|F|0--50:A>C	TGCAGCGAGATCAGTAATACGAGTACATGTCTAACACAGCTGAGATCAAGAAAGTAAGCAGAAAACGTT	chr2R	829233135					0.046425801	0.0903554
GYD	100010907|F|0--22:G>A	TGCAGGACCAATTCAATTCTGCGCACGAAGTCCAAGCGATCCATCTGCCGCTTCAGGTTTCAGCAACTC	chr2R	829459236					0.038279233	0.043995839
GYD	3596188|F|0--9:A>C	TGCAGACGAAGACGACGACGATATAGCCGCCGATGCAGAGACATTGACAAGACTTTACGAGCCGATCAT	chr2R	842695355					0.047543045	0.043236326
GYD	100138753|F|0--23:C>A	TGCAGCTGCCGGCCGAGGAGGAGCTGCCGTCCGAGGCAGCGCTTCCCCCGCTGGGTCCAAGCATGCGTG	chr2R	843492497	SECCE2Rv1G0125820.1	Ribosomal RNA large subunit methyltransferase E			0.027482831	0.092708989
GYD	100138754|F|0--31:T>C	TGCAGCTGCCGGCCGAGGAGGAGCTGCCGTCTGAGGCAGCGCTTCCCCCGCTGGGTCCAAGCATGCGTG	chr2R	843492497	SECCE2Rv1G0125820.1	Ribosomal RNA large subunit methyltransferase E			0.036520458	0.066531334
GYD	3580391|F|0--37:C>T	TGCAGGAGACCATAATACACGCGTTAGTTGATGTCAACACAACGAGCTCCTGCCCAGGCAATTCTCAAG	chr2R	844316846					0.036520458	0.053198992
GYD	3891481|F|0--5:A>G	TGCAGACCTAGCAGGATGTTCAGCTGTGTCTCGTCGCCTGAAAATTTAATGTACATAACATGGATCTTT	chr2R	844447154					0.049957476	0.063190576
GYD	3342597|F|0--44:A>G	TGCAGCAACAACACCACCATCCTGCAACTCGCTCGTCTCCTTGCAGAGAAGTACCCACAATACAGCGTG	chr2R	844463882	SECCE2Rv1G0126050.1	Anthocyanidin reductase			0.046329564	0.097174449
GYD	5214840|F|0--42:C>T	TGCAGCTGCAAGCGACACCCTCAAGGCGGGCCAGTCGCTCGCCGTCGGCGGCAGCGAGCTCGTCTCGGG	chr2R	850945253	SECCE2Rv1G0127100.1	Serine/threonine-protein kinase			0.024364874	0.081594958
GYD	3744532|F|0--32:A>C	TGCAGCCTCGCCTTGCTCCATTGCCAGCCTTGACGAGCTGCACGTACGAGCAGGAGCACGGACATTCCC	chr2R	851514476					0.035758276	0.068046171
GYD	100044342|F|0--17:G>A	TGCAGCCAGCCCACCGCGGTGCCTGGACATGTCTAGACGTGGCATGCCCGCCTGGCCGCAGCAGCCCCT	chr2R	853383373					0.039894025	0.041582503
GYD	3360189|F|0--37:A>G	TGCAGAAGTTCAGAAAGCATCAAGATTTGCTGAACCCAGAGAAGACAGCAAGCCACAGACAGTAATGCT	chr2R	854222627					0.044841481	0.090675617
GYD	100033623|F|0--39:A>G	TGCAGAACAAGGTACTAAGTCGAACCATATCTCTCTGTCAGCACCTTTATTTTTAGGTACACATACATT	chr2R	854388351					0.025966178	0.047110522
GYD	5227229|F|0--65:G>C	TGCAGGCCAGGCCAAGCCAGGGCGCCATTAACGCCCAACCTGGGCGAGGTGGTTGGGGTTCGGTTGGGT	chr2R	856854500					0.023581597	0.176026603
GYD	3363298|F|0--46:T>G	TGCAGGGCGAAGAAGACAGTGCAGCAGCAGGATAACAGCAGCGGCCTTCGTCCCATGTTTCAGGTCACC	chr2R	859457683	SECCE2Rv1G0128270.1	RING/U-box superfamily protein			0.04413032	0.099297626
GYD	100150522|F|0--62:G>C	TGCAGTGCCTGGTGGCGCACCTGTGGCGGAGCATGACCAAGGCGCGCGGGCTCGACGGCGGGGAGACCA	chr2R	866503204	SECCE2Rv1G0129060.1	Agmatine coumaroyltransferase-2			0.030613751	0.056657351
GYD	3732474|F|0--13:C>G	TGCAGGATGTTCTCCGTATCATACTGTCAAGATTGACAATGAAAGAGGCTGTGCGGATGAGCGTACTAT	chr2R	866926328					0.046930884	0.049919911
GYD	3364147|F|0--68:C>G	TGCAGCATTCCCACTCAGTGCAGACTTACAAAATTTGAGATCAACCGCACTGGAATTTCGGTGCATGTC	chr2R	867519693					0.045322613	0.067731551
GYD	3906446|F|0--48:G>A	TGCAGGATCCCAAGGGGCTGTGCGCCGAGAAGGGCGCGTCCGTGCCGGGCGGAGTCGGCCCGTTCGGGC	chr2R	867669497	SECCE2Rv1G0129320.1	Beta-fructofuranosidase, insoluble protein			0.014583169	0.099783142
GYD	3362564|F|0--13:G>C	TGCAGTAGTACTAGACCTCGCACCTGCAACGATGAAATTTCTTCTTCTGCTCATCGCCGCGAGCTCCGC	chr2R	872620521					0.044841481	0.044195747
GYD	5047300|F|0--36:C>A	TGCAGGTTCACGGGCGGGGAACTTCACCGGCGTTGGCCGCCAACTGCACCCAAGCTTCCTCCCTGCTCC	chr2R	884469146					0.011838457	0.192389299
GYD	100126388|F|0--22:C>T	TGCAGGCCATAGGCACCGTCGTCGGCGCTGGAAGCGACAACCAGAAGGAGAAATGGGAAGATAACCGCC	chr2R	884852916	SECCE2Rv1G0131480.1	Beta-glucosidase			0.048825954	0.065451658
GYD	100076698|F|0--35:C>G	TGCAGCAGCCGGGAGTAGGCGCCCTCGGGCCGCGCCACGAGCTCCGAGTGCCCACCATGCTCAACAACG	chr2R	885301876	SECCE2Rv1G0131570.1	ABC transporter ATP-binding protein			0.033453564	0.081392489
GYD	100020444|F|0--42:G>A	TGCAGGGGCCGGGGGCTCGCATTTTGGTTTCGTCCTTGGCTCGGGAGGGTGTGTACCTGCATGCATGCA	chr2R	885454279					0.028899267	0.111306412
GYD	3365322|F|0--39:C>T	TGCAGTCCGATAGCGCAATCGAATCGGCGAGCTTGCTTGCTAGCCAGGGACAAGGATTTAAGAGGTCGT	chr2R	888524878					0.034670668	0.082592876
GYD	3589959|F|0--20:G>C	TGCAGCACGTCCTGCTCTACGAGGGCGACGGCATTCCGCCCTTCGACGCCATTCTCCAGTCCCTCCGCT	chr2R	888631557	SECCE2Rv1G0132200.1	Anthocyanin 5-aromatic acyltransferase			0.023581597	0.101435887
GYD	100067890|F|0--24:G>A	TGCAGCCGCGAGGGCGAACTCGCCGCGAAGCTCTCGTGCGGGGAGGCTCACGAAACACGGCCAGAGGCA	chr2R	888722660			0.0304162	0.0608894
GYD	3596626|F|0--49:G>A	TGCAGAAATGGGACCGCGTGTACGACTACGCGCTCTACAACGACCTCGGGAACCCCGACGTGCGCGAGG	chr2R	888768695	SECCE2Rv1G0132250.1	Lipoxygenase			0.035144443	0.077792365
GYD	100077389|F|0--66:G>C	TGCAGCCCGTACACCGCCACCGACTGCGGCTCCGACATCGGATGCAGCTGCGGGCTCAAGATCTGCGAG	chr2R	889120267	SECCE2Rv1G0132320.1	transcription factor-like protein	0.0393912	0.0330395
GYD	100014313|F|0--61:C>G	TGCAGAATGTCCGCACAAAACTTAACCAAGTTGCTTCTGTAAGTCCAAAAGCTTAGATTTCCTGCTCTT	chr2R	896548207			0.0270066	0.0498339
GYD	100148680|F|0--31:C>T	TGCAGCCGCTCTCACCTAATCATTCTCCCGTCGCCGTCGAGCTCCAGCTTAATTATTCCGCTCCTGGAT	chr2R	898173062					0.034719536	0.060247762
GYD	100074977|F|0--23:A>G	TGCAGAAGGTGGTAGTGAAGCTCAACCTGCACGACGACACGCGGAACCGCAAGGCGATCAAGGTCGTCC	chr2R	898476718			0.0372009	0.0452766
GYD	100164208|F|0--37:A>G	TGCAGCTACTACTGCTATGACTAATCAATCAGGCCAAACCAATTGCAGATTGCAGCGGTCTCTGTCATC	chr2R	899396510					0.034131965	0.088976499
GYD	5200637|F|0--53:A>T	TGCAGCGTGCTGTAAAGCCCGATCCTCCCCACTAAGAAGAGCCTTTTGCGAGCACCGGCGACGAGATAC	chr2R	900773681	SECCE2Rv1G0134210.1	F-box family protein			0.038879974	0.077979902
GYD	100092021|F|0--53:T>G	TGCAGGCAGAACAAACCCCTCCTCCATCGCTCATCACCAGATGGAAGAAGACATCATTGAGACCAGACC	chr2R	910529154	SECCE2Rv1G0136200.1	Pentatricopeptide repeat-containing protein			0.047560365	0.096784796
GYD	100005706|F|0--58:C>T	TGCAGAAGCTGTGGCGCCTCGACCTGTCCAAGAACAAGCTCACGGGCGCTCTGCCTGACGACTTCGCCG	chr2R	917508267	SECCE2Rv1G0137270.1	Leucine-rich repeat receptor-like protein kinase family protein			0.044841481	0.065126592
GYD	3730718|F|0--15:G>T	TGCAGCAGGAACATAGATACATGCACAACTGAAGCTGGTAGAAGAACGTGTGGTATGAAGATGTAGAAG	chr2R	922040205					0.038703216	0.061866116
GYD	3908511|F|0--19:C>T	TGCAGCACCTTCCTTCTTCCTCTGGTGGTGTTAATTAATTTCCCTATATCTTAAAATATGAATCACAGC	chr2R	929184420					0.046930884	0.046379347
GYD	3897575|F|0--11:C>A	TGCAGCAGGTCCCTGAGCTCATCCACGTCGACGGCGGCGGCGCTGCGGGCCCTGCCCTCCCCGTCGGAC	chr2R	929825191	SECCE2Rv1G0140000.1	Glutathione-regulated potassium-efflux system protein			0.039705471	0.052880936
GYD	3360178|F|0--41:C>G	TGCAGCTGCTCCTTGTACCGCTCTTCTCCCTCGCCGCCGCTCGCTTCCTCCTCCTCCATGCCCGTGCGT	chr2R	931385781	SECCE2Rv1G0140390.1	Cytochrome P450 family protein, expressed			0.047560365	0.034021999
GYD	3350004|F|0--46:C>G	TGCAGGAAGCCCACCATGAGGGCCGTCCAGGAGACCACGTTCCTCTCGAGCATTCCGTCGAACACCTGG	chr2R	931404407	SECCE2Rv1G0140460.1	Pentatricopeptide repeat-containing family protein			0.035665402	0.047664739
GYD	100005731|F|0--42:A>G	TGCAGCATCAGTGTAGCTAATTCAGAATCATTATCTTCTGGAATGCAGTAGATACTTAATGAATTGATT	chr2R	932533747			0.0457836	0.0314937
GYD	100038909|F|0--10:G>C	TGCAGAATCGGTTGTCCACACGACAAGTGGACGGTAAAACAAATGGATGGATGTTGGTTAATGAGCATT	chr2R	943817996	SECCE2Rv1G0143060.1	F-box protein	0.0371677	0.0390762
GYD	100017286|F|0--38:C>T	TGCAGATGGCCCTAATTATGGACAACTGACTGATACGGCATTCATATCCTTGGTCGCAGGCCATATCAT	chr3R	5097240			0.0273786	0.0949646
GYD	3731326|F|0--44:G>C	TGCAGCTGGAAGTCGAGGTTGAGGTGCTTGAAGTTGCGGGTCAGGGTGCCCCGCGGCCCAGTCACCGTG	chr3R	5334173	SECCE3Rv1G0144740.1	50S ribosomal protein L6			0.039361755	0.095837523
GYD	100028868|F|0--41:C>T	TGCAGATCGATTGACACAAAGCGAAGGAGAAAGTGATCGATCGAAATGAGAGCACGACTAGAATATACT	chr3R	5414732			0.0417253	0.0377428
GYD	100014226|F|0--57:C>A	TGCAGGAGTCCTCATCCATTATTCCACTCAACCGTACATCAAGTTCTCTGGTAAGATCTTTTATCTTCT	chr3R	8825258			0.0215265	0.0936704
GYD	3360758|F|0--36:C>T	TGCAGCTGGACGTGATCAGGCTTCCTTTCCGTTTTTCTTTTTGTTTTGTCACGCAACTCCTAAGGTTGA	chr3R	11270744					0.047933145	0.196645827
GYD	5137580|F|0--57:T>C	TGCAGCAGCTGCTGCAACTGGCGCTGCTCCTAGCAAGTATGTCCCAAAGTGGAAACGTGAGGGAGACAG	chr3R	12223438	SECCE3Rv1G0146710.1	Eukaryotic translation initiation factor 3 subunit A			0.032690436	0.215265865
GYD	100034700|F|0--17:C>T	TGCAGCTCCTCGATGTACGCGACGGCGTCCTGGATGATAGACGCCTTGTCCATCTAACGTCGCACAAAT	chr3R	14726646					0.036520458	0.041386162
GYD	3598579|F|0--37:C>T	TGCAGAAAGATATCGTTGTGTGCGAGCCCATCACAGGCGAGCGGCACCGCGTGCCCATGCCGCCTGAAC	chr3R	16323068					0.03135653	0.086889685
GYD	100156932|F|0--35:C>T	TGCAGCAGCACCTAGTTGGCCACACGAAAGGCTCTCCCGTGGATCGATGAGGTGGCCCGACCTAGTCCC	chr3R	16333855					0.036907805	0.066161723
GYD	100156932|F|0--43:T>C	TGCAGCAGCACCTAGTTGGCCACACGAAAGGCTCTCCCGTGGATCGATGAGGTGGCCCGACCTAGTCCC	chr3R	16333855					0.044287859	0.0630339
GYD	100126074|F|0--63:G>A	TGCAGGAGACACGGTTTTCTTTCCGTGAGAGGCACGATCATGCCTCTCGTAAATGGAAAAGAAGACGCG	chr3R	18946320					0.042863456	0.166899983
GYD	100022350|F|0--37:T>C	TGCAGTTAAATTTTGGGGTCATGTCATGTGTGCCGGCTTGCCGCATATGTGGACAACTCCTCGATCATG	chr3R	19244339					0.048712385	0.083040784
GYD	100163607|F|0--37:C>G	TGCAGATGAGGCCGAGGGCGAGGAGCCTGTGGCTGCTCGTGCGCCGGCTGCTCTGCCGCGGCAGCAAGC	chr3R	19262239	SECCE3Rv1G0148590.1	DnaJ heat shock amino-terminal domain protein (DUF1977)			0.035823459	0.056108565
GYD	100025401|F|0--13:G>A	TGCAGCACAAATCGACATTGGCGAGCGATGGATCAACACGTACGCTGCGAACCGGGAACAAACTAAAGG	chr3R	26321723			0.0224814	0.0731639
GYD	100052386|F|0--65:G>C	TGCAGCCGCTGGATCGAGCTCGGCGCCTTCTACCCCTTCTCCAGGGACCACGCCAACTTCGCCTCGCCG	chr3R	27553894	SECCE3Rv1G0149680.1	Alpha-glucosidase	0.0276826	0.037555
GYD	100012137|F|0--41:C>T	TGCAGCCCCTTGTGCGTGGCGATGGCCTGCGAGAAGCCATACAAGCTGTGGGCATTGTACTCGAGGATG	chr3R	27642466	SECCE3Rv1G0149680.1	Alpha-glucosidase	0.0273786	0.033913
GYD	100026870|F|0--56:T>A	TGCAGTGTCTTTTTGCTTTTGTGCCATGGTACTAAATCATCAATAATACTAGTGCTTCTCTCTCTCTCT	chr3R	28993298			0.0354014	0.047568
GYD	100005444|F|0--5:C>T	TGCAGCGTTGCATACAGACAAAACATGGCATCCTCAGTAGTTCAGTATACCAGAAGAGATGTGCTGAAG	chr3R	29738883			0.0456338	0.0277948
GYD	100079311|F|0--48:C>G	TGCAGCCGCTCGTCGGCGCCCTCCAGGTCCCACAGGAACCCCACCTTGCCATGGTCGCTCGGGTCCCTC	chr3R	31510968	SECCE3Rv1G0150320.1	Dihydroflavonol-4-reductase	0.0340684	0.0274523
GYD	3593358|F|0--35:A>G	TGCAGGCACTGGAAGGCCACCTCGGCCACGCGGTCAATCGTTCTCTTTGTTTCGGGGTCGGTGTCATAC	chr3R	35130186	SECCE3Rv1G0151000.1	Protein kinase family protein			0.044841481	0.08385393
GYD	100037671|F|0--41:A>G	TGCAGCCACTCATAATTTCGTCGCGGGTCTTCCTTTGCCCCATCAATTGGGATACTTGAGAAAGGAATT	chr3R	38373834			0.0491131	0.0575037
GYD	100008691|F|0--42:A>T	TGCAGCCACTCATAATTTAGGGCCAGTTCTTTTGGTGGCTTCAAGAACTGGCCCTTACCCCTTAGTGCC	chr3R	38575471					0.045322613	0.054758524
GYD	3597219|F|0--61:A>G	TGCAGCAGCAGAAGAAACTAAAGCCATCGCTTGATTTGTTTTTTCTTGCTATGATGATGACAATGTATT	chr3R	40364249					0.047171332	0.060785431
GYD	100005293|F|0--57:C>T	TGCAGCTGAATTACAAGCAACTATACTACACAAACAGACTGGTAAAAGTAAAACCATCTGCCAGCAAAA	chr3R	41142098			0.0268937	0.0340106
GYD	3742843|F|0--27:G>C	TGCAGCTCGCCGTCTCCGCCCTCGCCCGTCGCTCGCCGTCAGCTAGGGAGGACGTCCGCTGCTCCGTTG	chr3R	42017301					0.037423854	0.064756153
GYD	100030523|F|0--60:T>A	TGCAGTTGTGCACCCATCGTACATGCATCCATGCCAATAATTAATCTACTTGAAGAAGTATGGGAGGTC	chr3R	43084497			0.0451873	0.0234224
GYD	100007112|F|0--42:C>A	TGCAGCTACAAATGGATGGATGTGTTACAGGAAGAAGATCTGCCCAGATGGCAATATGTTTTAGTGGCT	chr3R	43085320			0.0340684	0.0377863	0.033571901	0.026426445
GYD	100031869|F|0--12:A>G	TGCAGGTAGCAAAAAGTTCATGAAAGAAAACAAAACGCAGCCGCCACCGCCACCTTCGCGGATGAGATC	chr3R	43501382			0.0215265	0.0429424
GYD	100031869|F|0--45:A>G	TGCAGGTAGCAAAAAGTTCATGAAAGAAAACAAAACGCAGCCGCCACCGCCACCTTCGCGGATGAGATC	chr3R	43501382					0.038878943	0.086999782
GYD	100004067|F|0--33:T>C	TGCAGGTGCGCTGAAGCCAAACGAACACGGTCGTTTAAGCACTACGTGGTCGCCATTAGTAACCGAGAT	chr3R	44507550			0.0219602	0.0467319
GYD	100057482|F|0--58:G>A	TGCAGGCAGTCATGTACCAGTACCACGGCTCTACCGCTCTAGCCTCTAGCCTCTAGCGGCCGTGTCATG	chr3R	44650041			0.0321704	0.0281201	0.047486813	0.056012246
GYD	100011769|F|0--7:C>A	TGCAGTACATTGAGGAAGACGATCAGATCAGTACACACGTAGGTAACGATTGAGTCTAGCGAACATACC	chr3R	44859512			0.0282008	0.0262633
GYD	100062377|F|0--51:T>G	TGCAGTCCAACATAGTTTCAATCCAACGCTAAAAACATGGCTCCATCGATGTTTACAGTCCCGTGGGTA	chr3R	45699898					0.033684151	0.052152032
GYD	100054039|F|0--68:C>T	TGCAGGAAGAAGATGAGCACCGCCCAGTAGAACGCCACGTCGCTGAAGAGCGACGAGAGCCCGAGCAAC	chr3R	47113548	SECCE3Rv1G0152370.1	Ethylene-dependent gravitropism-deficient and yellow-green-like 2 isoform 2	0.0215265	0.0931619
GYD	100044515|F|0--27:T>C	TGCAGCCTGAAGAATTGGTGAGCGAAGTAGCCTGCGTCGCCGTATGAATCAGATCTTTTCTTAGGGAAG	chr3R	49673649					0.038879974	0.029838308
GYD	100075467|F|0--64:G>A	TGCAGAGATAAAAAGAAGTATATACAGAATGATCACAATTAGCTTCAATAAGCAAAGCAAAATGGAATT	chr3R	49884322					0.044841481	0.070524741
GYD	100157357|F|0--14:C>A	TGCAGCGCCTGGAGCGGGGTAACGGAGATGCAGGGCGGGCCGAAGTAGTTGCCGAGGAGCAGCGGCGCG	chr3R	49932209	SECCE3Rv1G0152730.1	Beta-xylosidase, putative			0.030260266	0.167618484
GYD	5041314|F|0--37:A>G	TGCAGCTTCTCTTCAGTGAGTCATCGATCGATCTCAGACCGTTCTTGGTCGATCGATCGCCGCCGTCGA	chr3R	50116996					0.044841481	0.040476325
GYD	3596865|F|0--43:G>A	TGCAGCCCCTCCTATAAAACCCCCATCCAATCCCCACCCGTCTGAAGAACCCTCCGCCACTTCCCCGTG	chr3R	50240792					0.047207973	0.041191336
GYD	3907532|F|0--32:G>C	TGCAGATCACGACGGCGTACCTAGAGGGGGAGGGCTCTGGTCGACGCCAGAGGTCGGAGACGGGGAGTG	chr3R	51951960					0.033684151	0.112590371
GYD	100031686|F|0--61:C>G	TGCAGGCACGACCGCATGACCTTCTTGACCTTGGCGTCCTTGGCGTAGGCGAGCGCAGACTCGATGCTG	chr3R	52248527	SECCE3Rv1G0153090.1	Invertase inhibitor			0.036440481	0.031257738
GYD	100028485|F|0--24:C>G	TGCAGGAGATCAGCCATGGCGAACCGACGTCTGGATTGACTGGCTCTGTAAGTACTCACTCTGGACTGG	chr3R	53040547			0.0193881	0.0541049
GYD	100020038|F|0--28:C>G	TGCAGCAGAGGTATTCAGTTCGTTGATCCACTCTCCGATTCCAAATCGGACGAATCTGATTTTCTCTCC	chr3R	53194906			0.0226078	0.0331849
GYD	100017718|F|0--38:C>A	TGCAGCTTCATGGCCAAGTACGTCAGCAACACCCTCCTCTGGCACTTCGTTCCTCCCCTCGGCTTCCCT	chr3R	55791592			0.0219602	0.0558076
GYD	100017718|F|0--8:C>T	TGCAGCTTCATGGCCAAGTACGTCAGCAACACCCTCCTCTGGCACTTCGTTCCTCCCCTCGGCTTCCCT	chr3R	55791592			0.0215265	0.0409588
GYD	3597235|F|0--38:A>C	TGCAGCTTCATGGCCAAGTACGTCAGCAACACCCTCCTATGGCACTTCGTTCCTCCCCTCGGCTTCCCT	chr3R	55791592					0.042787218	0.049049367
GYD	3590428|F|0--20:A>G	TGCAGCCTTGTTTCTACAGTATATCTACAGTATCACATGTATCGTGGCCGTAGAATATGACTGTGGACA	chr3R	57144748					0.038878943	0.094959218
GYD	100158032|F|0--44:T>A	TGCAGGCGTCGGCGGCTTTGATGTGTTACGCGATTGGTAGCAAATCAATCAAGGCGGCAGCGGCGAACG	chr3R	59814254					0.04605425	0.068297731
GYD	100079886|F|0--54:G>C	TGCAGCCGAGAGGATCCAATCTCATGACCTGGCGAAAGAGTGTACCCAACTGACGAGTCGAGCATGAGG	chr3R	64813957					0.045656344	0.025873276
GYD	5138722|F|0--33:C>T	TGCAGCTCCGTCCGCTCCGGGAGCGGAGGGACTCGCCCGCTCCGAGATTTCTAACCGCAGCTCCGTCCG	chr3R	64963163					0.049708438	0.066595571
GYD	3352378|F|0--24:G>C	TGCAGGATCCGAGGATGCTATGCAGACGAAGTGGTCATGCGTGATATCACCTTCCATGGAGACGAGCTG	chr3R	65155365	SECCE3Rv1G0155360.1	vernalization5/VIN3-like protein			0.049730133	0.080526261
GYD	3351107|F|0--40:A>C	TGCAGGGGCAGCCGCTCCTCGCCACCAGTACGTATCAGCTAGACCGATCGCCATGGCCAACTGTTCTTG	chr3R	67073179					0.046500394	0.046688171
GYD	100048427|F|0--40:C>T	TGCAGAGCGCGAAGACGACGTTGGGTTCAGGGTACCCTAGCCCGTAGCAGAGCTCCATATCCCTCTCCC	chr3R	67073182	SECCE3Rv1G0155570.1	transcription factor, putative (Protein of unknown function, DUF547)	0.0454971	0.0197455
GYD	3593929|F|0--29:C>G	TGCAGGGACGGCGAGGGAGCCGTGGTGGACCTCCCCTGCCATGACCGCACCCTACTGCGCGCACGCGCC	chr3R	68264065	SECCE3Rv1G0155700.1	Hydroxycinnamoyl-CoA shikimate/quinate hydroxycinnamoyltransferase			0.025454329	0.064474096
GYD	100021348|F|0--35:A>G	TGCAGCCTTAGGAGCACATCCAGCAAGTCTTCGCTATCTCGAGCAGCGGAAGACGCACCAGCAGCAGTT	chr3R	69030736	SECCE3Rv1G0155740.1	Cytochrome P450			0.040264172	0.040359099
GYD	100026421|F|0--30:G>A	TGCAGAGATCAAGCTTCCATCCGGATTCCTGAGGACCATCCGTGAACCCGCAGTCCCGTCAGAGGAGAA	chr3R	69265658			0.0473866	0.0314994
GYD	3745623|F|0--5:T>C	TGCAGTCGGCTTCCCTGTCTGTCACCACTGCTGTAAACAACGTCGTTCAAGCAGACGATATGGCTGCAA	chr3R	71100680					0.038878943	0.04475344
GYD	100019039|F|0--53:T>C	TGCAGTCGGCTGTTTGGAAATATAGCTTGTCCCTGGCAAGGTCGTAGAGCAGGTGCATGTTCTGCAACT	chr3R	73549698	SECCE3Rv1G0156520.1	Aspartic proteinase nepenthesin-1			0.040328838	0.027532716
GYD	3593739|F|0--48:G>C	TGCAGGCACAGCGTAGGCGCGCGAGGACCATGAGGAGCATGTCGTCGGGGAGGGCACTGAGGGGGTCAC	chr3R	73640002	SECCE3Rv1G0156640.1	F-box family protein			0.047589111	0.034559126
GYD	100041319|F|0--36:T>G	TGCAGCGATACAGAGTGGACCTTGATGTCGGATGTATATGCGAGCATGCTGAGCACACGGAGACGCGGG	chr3R	73760567	SECCE3Rv1G0156640.1	F-box family protein	0.0411047	0.0499823
GYD	100042201|F|0--44:C>T	TGCAGTGTCGCACGGAAGCGGTTGATCCTACTTGCGTTCACGTTCCTCTTATTTTTGTCCCTAGCTCGG	chr3R	74342838					0.043426633	0.021316501
GYD	100058172|F|0--31:G>C	TGCAGCTAGCAATGCACAGATCACACCACGCGAGGGAGGAACCATGCATGTGCGCGGTGCGCTCCATCG	chr3R	80218316			0.0488898	0.0174172	0.047171332	0.07458189
GYD	100025560|F|0--26:A>G	TGCAGATTGTATCTGGATTCACCCTCAGAGTATCTCCCTACAAAGCAGCAGGAGCACTGATGATGCGGA	chr3R	80223593					0.044685142	0.094647791
GYD	100029431|F|0--9:C>T	TGCAGTAAACACCAGCAATAATCACCGTATACATATCATAACTTGGACTAAGTTGATCAGCAACAATTA	chr3R	80945082			0.0382503	0.0383653
GYD	100009202|F|0--57:C>G	TGCAGCCTCTACGGGGACGCACTGGTGTCGCCCTCGCTGGAGCGCCTCGCCATCGTCCACTGTCACACC	chr3R	85798381	SECCE3Rv1G0158150.1	F-box family protein			0.031738731	0.11278376
GYD	100021527|F|0--50:C>G	TGCAGGTTAAAGTTAAACAAAAGGGTTAGATCTAATCTACTGCTGCTACACCCCTAATGGAGGGCAGGG	chr3R	91273579			0.0435177	0.0179622
GYD	3743464|F|0--34:C>T	TGCAGAAAGCAGTATCCGCCGCCTTGCCGCACCACCGATTGTCGCCGGCCCCGGCAGACGCCAGTGCGC	chr3R	91279077					0.039361755	0.067716388
GYD	100030569|F|0--16:A>G	TGCAGTTCGGCACGGCATTCGAGCAGCTTGTCAATGCTCACCAGGACTCAAAAACAACGCTGGACTCCA	chr3R	150961298	SECCE3Rv1G0163720.1	ABC transporter-like family-protein			0.047544645	0.072639412
GYD	100014449|F|0--17:T>C	TGCAGCAACTTTTCAAGTTTCGATCCACTAATTTCGCTCTAAAGTACGAAAACTCGGCCCACTCTTGGT	chr3R	163084472					0.041577797	0.115670306
GYD	100050655|F|0--24:G>A	TGCAGGGACGTACACGGTGGGCCCGCCGCCGTCTCTGCAAGCCGAGTCCCATGTCTGCTCGAACGCCTG	chr3R	163196196	SECCE3Rv1G0164440.1	Pectin lyase-like superfamily protein			0.027677953	0.118117918
GYD	100054996|F|0--14:C>T	TGCAGTCACGCGGGCGCTTTACCGACCACGGTAAATTCAGACACGAGGCAATGTACACATGCTTTAGCA	chr3R	166616501					0.035758276	0.132657714
GYD	3735485|F|0--49:G>A	TGCAGCCTAGGCGTCGGAGATGCGGGCCGGCGCACCCAAGAGCGAGGCCGATGCGAGCACTGCTGGCCG	chr3R	204893583					0.035144443	0.113262383
GYD	5047332|F|0--54:C>T	TGCAGCCATCTACCGGACTTTTGTTTGCTGGAGCACGGTGGTGGAAGCCGATGACGGCGGCAAGCCGAG	chr3R	518931510					0.044841481	0.10940014
GYD	3595529|F|0--61:G>A	TGCAGGTGGTTGTCCTCGAACGGCACCTTGCCGGTCAGGAGCTCGAAGCAGATCATGGCGAGGCTGTAC	chr3R	607375076	SECCE3Rv1G0181200.1	Kinase family protein			0.044568481	0.067167302
GYD	100076931|F|0--44:C>G	TGCAGCATCAGCATAACCGGCCACAGCCTCGGAGGCGCACTGTCCACGCTCAACGCCATCGACCTGGTC	chr3R	633672863	SECCE3Rv1G0182610.1	Phospholipase A1			0.044165858	0.063403779
GYD	100084089|F|0--19:C>T	TGCAGACGACGAAGCCGCACCTCCTCCGCGAGCACAAGGTGCATCCGCAAGCGGCACGCCTCCGCCACG	chr3R	639324208	SECCE3Rv1G0182900.1	Protein phosphatase 2c, putative	0.0430204	0.0192564
GYD	100017568|F|0--41:T>C	TGCAGAAGGATCCCCCCACCTCATGCAGTGCAGGTCTTGCTTCTTCCTCGCTTTGCTTGCTTCTTTTGG	chr3R	641181072			0.0456331	0.0225041
GYD	100008619|F|0--61:G>C	TGCAGTTCCCAGCTGAAGCGACGAAGCGAGGCACGGTAATTGAAGCAATGAGATCTCGTACGTATGTAC	chr3R	642779001			0.0349731	0.030214	0.047207973	0.025281867
GYD	3589392|F|0--36:G>A	TGCAGCCGCGGAGGACGTCGTCAAGAGGGAGCTGGTGGTGGACACCACACCCAGCGGCGGCGCCCTCAC	chr3R	650433092	SECCE3Rv1G0183480.1	WRKY transcription factor			0.040264172	0.072034334
GYD	100077264|F|0--21:A>G	TGCAGCCATTGCGTGGATTATAGTTGTTCGTCAGATCAAATTCACCAAGCACACATTAGCTTGTATCGA	chr3R	650991553					0.047583099	0.064359517
GYD	100026964|F|0--11:C>A	TGCAGTGACGCCTAAGCCGTGTTGAAGCAGTCCCAGCTTCGTCTTCGTGAAGTCCTCATACGCCTCTTC	chr3R	652963398	SECCE3Rv1G0183650.1	Wuschel homeobox protein	0.041628	0.0413992	0.046425801	0.040183322
GYD	100084896|F|0--30:G>A	TGCAGGAAGATCGGCTCGACGTCGTTGGCGGCGAACTCGTCCAAATTTGGAGCAGGAGCCGGAGCCAGA	chr3R	652963741	SECCE3Rv1G0183650.1	Wuschel homeobox protein			0.042473865	0.120814863
GYD	100019038|F|0--20:G>C	TGCAGAAAATTCAGTCAGTAGATGTATGATGGAGGGAGGGAGCAGCAGGTACAGTTGCATTGGCGACCA	chr3R	655395786			0.0408239	0.056778
GYD	100009420|F|0--17:T>C	TGCAGCAATGGCACGAATAACAACAAACGGGCAACGCTCGAACAGTCAGAAGTATGAAGTGCGAGAACC	chr3R	661051207			0.0354014	0.0551031
GYD	3348245|F|0--12:A>G	TGCAGTAAATGCAGGCAAGAAGGACATCGAAGCTTCTATTGCCCAACAGTGAGGGCAATTTCAGCCAGA	chr3R	661053568	SECCE3Rv1G0184250.1	Gag-Pol polyprotein			0.018937234	0.104301682
GYD	3343696|F|0--44:C>T	TGCAGACGAGATGAACGCGGATCAAACATGATACTCTCCACGTACATGTGGGCATGGTCCAGTCCATCC	chr3R	668582043					0.035758276	0.083193833
GYD	100125685|F|0--23:A>G	TGCAGCTGCCGCCCATGTACCCGAAGCCAAGCACGGAGATAGTCGACATCTCCGACGAGGAGTAGATAG	chr3R	675837077					0.046890925	0.041537345
GYD	100018980|F|0--42:G>A	TGCAGATAAGGCTTCACCGTTCTCCATGTGCGCTGTACAGCCGCCGCCGCCGAGCTGCCCAGGCTGCCG	chr3R	688821453			0.0349731	0.0336742
GYD	3347467|F|0--41:C>G	TGCAGCACCTGTTGGAATATATAGCATGAAAAATAGATTAGCAGCCATTTCGACACTCCTGGTACCGCC	chr3R	694461648					0.047750101	0.056284134
GYD	100024865|F|0--57:A>T	TGCAGAAGATCAAAGATGCACAAGCTGAACTACCTCAAAGGTTTAAAGAGTCGCTCCAAATAACACGTA	chr3R	695448336			0.0354014	0.0462124
GYD	100006476|F|0--23:A>G	TGCAGAGCCGTCTCCGAGACATTAGTTGAAGCAACACACCAAGTACCATTTGAACGGTTTCCTCCAGTC	chr3R	705458727	SECCE3Rv1G0187810.1	Glucan endo-1,3-beta-glucosidase, putative			0.038089107	0.037863293
GYD	100045058|F|0--48:G>A	TGCAGAAGCCGTGCCAAACCTCTTGGGCGAAAGAACAACCTAGCATGAGCTGAGCTGCTGATTCGTCCA	chr3R	709840154			0.0333818	0.0323395
GYD	100050562|F|0--9:T>G	TGCAGCGGCTGCGGCGCCCAGGCCATGGAGCCTAAGTTCGAGCTGGTTGTCCAAGACGTCGCGCTGCAA	chr3R	710760547	SECCE3Rv1G0188210.1	transcription factor-like protein			0.046850906	0.016416581
GYD	100029841|F|0--29:C>G	TGCAGCGGTAAGTAATTAGGCATGGAGGACGTACGGACACTAGTCCGTGAGATGGGCCATAAACCACGG	chr3R	715363930					0.045656344	0.036465377
GYD	3579858|F|0--51:A>G	TGCAGCGACTCGAGAAGGCGCCAAGCTGGAGTCTTGCCCCCGAGCTGGCCCACCATCTCGGGTTTTTGT	chr3R	715801416					0.034646133	0.083041756
GYD	5047231|F|0--18:G>T	TGCAGCCGCTCCCGTTCAGTCATGTTCTAAGCTATCACTGTCGCCTCTCCAAGACCCGGCCCTCGTTCC	chr3R	724369368					0.035136765	0.11051669
GYD	100018776|F|0--45:T>A	TGCAGGTTGATTGTTACTCTATACAAATACATTTATCTTGTGCTGTATCATGTTCCTTAAATTAAATCG	chr3R	725277425					0.047802737	0.035692528
GYD	3748392|F|0--34:A>C	TGCAGTGCCGTTGCATCGACGACCCTGCGTGCATAGGTTAGCTCATCTTTGCACGAAAGCTAGGGGCAT	chr3R	733267632					0.032618401	0.121155184
GYD	100032865|F|0--5:C>T	TGCAGCTGCTGCTCTAGGAGTGAACATACTCATTCACCAAGGAATATCATGAGTTTACTTTTCAGAAGA	chr3R	769773597			0.0474828	0.0313409
GYD	100038905|F|0--65:T>C	TGCAGAGGGCCCATTGGATGATTCGTGCCGAGCTTCATCCCTGTATCGATGTCCTCTTTCGTTGCTACC	chr3R	770905288	SECCE3Rv1G0193520.1	Fatty acid oxidation complex subunit alpha			0.035144443	0.132092045
GYD	5035557|F|0--5:C>A	TGCAGCGTGTCGGCGGCGACGAGGCGGCCGTTCATGGCGTAGGGGTTGTTGGTGGAGACCATGTTGAAG	chr3R	775853103	SECCE3Rv1G0193940.1	Auxin efflux carrier component			0.048517124	0.141883609
GYD	100032791|F|0--7:G>A	TGCAGTAGTAAACTATGCTCTGGACCACATGAAAAATATGAAAAAACAGCTTTAAGAACATCAAGTCAC	chr3R	778878938					0.046569902	0.062475879
GYD	100033724|F|0--23:G>A	TGCAGCTAAGCTCAGCTACTTATGCTGCCACACCGAGCTACAGTACTGAGCTGTAGTAGTAGTATGAGT	chr3R	781223519			0.047308	0.0197555
GYD	100004359|F|0--10:T>C	TGCAGTAGGCTGCGCGCTCGTGAGTCCGACGCAGTTGTTGACCCATGACTCATGACTAGGAACATGGAC	chr3R	781831330					0.042910567	0.017804558
GYD	100003014|F|0--27:C>T	TGCAGGCGGTTGGTGCGGTATCCTCTGCCCCTGACCACCACAACATGCTCATCGGCACGCTGTTCTTAG	chr3R	788548244	SECCE3Rv1G0194970.1	WAT1-related protein			0.024406046	0.110938877
GYD	5202328|F|0--21:G>A	TGCAGCTGCGCCAAGTCGCCTGTTGCCAAATTCTTAAGACCACTTCATGGCGAGACATCAACGCCTCAA	chr3R	798679246					0.04833641	0.092329387
GYD	100034722|F|0--9:C>T	TGCAGAGGACGAGCGGTAGCTCAGCTCCAAGTACGACGAGACGAGGCAGCAAAGAGACAAAACTTACTA	chr3R	803302304			0.0354014	0.0242476
GYD	100022980|F|0--37:T>A	TGCAGAACACGAAATTAGGAACCCTTTGGTTCTGAACTCTTGGTGTCGGTGGTACACCCGTATGCTTGA	chr3R	803564696					0.024759223	0.164572618
GYD	3357161|F|0--23:T>C	TGCAGCGCCAATTAGGAGTGCCCTTTTCATCTAGGGGAGCTCCAACCTCCAAAGAAAAAAAGAGTAGAG	chr3R	803600790					0.046122165	0.076054274
GYD	100089140|F|0--18:T>C	TGCAGCACCCCGGCGTGCTCGCCTCCTCCCTCCACGCTCCCCGACAGCACGTCCCCTGCGACGACGACC	chr3R	805788423					0.032822582	0.117227627
GYD	100026835|F|0--26:G>C	TGCAGTTGGATCTGGATCTGACGGTGGTCGTTCGCTTCGAGCTGGTTTGCCCTAGAATGACGCCAGTCC	chr3R	817609671			0.0456331	0.0394299
GYD	100026835|F|0--38:G>C	TGCAGTTGGATCTGGATCTGACGGTGGTCGTTCGCTTCGAGCTGGTTTGCCCTAGAATGACGCCAGTCC	chr3R	817609671			0.0354014	0.0689402
GYD	100107722|F|0--52:C>T	TGCAGCTGGCGAGCGCGACCGGCCCGACGAGCCACGCGCGGCGGCGGAGCTGCGTGGCACGGTAGTGCT	chr3R	824720344	SECCE3Rv1G0197970.1	Glycosyltransferase			0.03211367	0.098771111
GYD	100103832|F|0--50:T>C	TGCAGGTACGCCGCGAGCAGCAGCCACGCCACCGCGCGCGTGGCGGCATCTGCCTGGTCCACCACCGCG	chr3R	829092244	SECCE3Rv1G0198210.1	Multidrug resistance protein ABC transporter family protein	0.0299532	0.0281989
GYD	5219456|F|0--62:C>G	TGCAGCAGATCGGGATACGGGCGCGGTCTGCGCTCGTCGCCGTCGTGTACGAGAAAGGGCTGCCCCTCT	chr3R	829092967	SECCE3Rv1G0198210.1	Multidrug resistance protein ABC transporter family protein			0.034646133	0.08478009
GYD	5207104|F|0--21:A>G	TGCAGGTGGTCTAGTTCAGCTACGGCTTGAGGCGCCCATGCGGGCCGAAGTGGAGCCGCGGTCAGAGTT	chr3R	829302299					0.047486813	0.047371321
GYD	3907409|F|0--6:A>G	TGCAGCACCGCGACCGTGGGTTGACTAGCACGTCAAGTCATCGCGGCCTTACATCATCGCTAAGTCGCC	chr3R	829302588					0.037266368	0.062677119
GYD	100026516|F|0--6:C>T	TGCAGTCTCTCCAGACCAAAGTACTCCCTAGCCCGCCCCTAGCCACAGTGCTCCCTGGCGCGCGCGGAT	chr3R	831697994			0.0456331	0.0491979
GYD	100177313|F|0--37:T>C	TGCAGTCTCTGGAGATCAGCCACGTATGGCCTCGCGATGGAGAGATTCGGCTCGCCATCATTGCGGGTA	chr3R	832228133					0.029891949	0.059469087
GYD	3906178|F|0--13:C>T	TGCAGAGAAATTTCCATGGCCGTTAACCCTGCCACCAGTGTAGTGGAGTGCAGTAGGTGGTGCTCGAAA	chr3R	832228136					0.034325179	0.056756982
GYD	3596104|F|0--59:C>G	TGCAGAGGTGGCCAGGCCGAGGGGCTCAGCCCGAGCGGCCCGACGTCGGTGGAGCCCCACGCCATGGCC	chr3R	832705893	SECCE3Rv1G0198490.1	G patch domain protein			0.039361755	0.071138737
GYD	100147602|F|0--68:A>T	TGCAGAAGCTGACGCCATGGGCGGACGGGCCGAGCATGGTGACGCAGTGCCCGATCCAGCCCAACGGCA	chr3R	833446275	SECCE3Rv1G0198560.1	Laccase			0.035136765	0.080800775
GYD	3592180|F|0--65:C>G	TGCAGGGCGGTGTTGACGCAGTGCACGGCGCACAGCTTCCCCTCCTGCACCTCGTGGTACAGCAGCCCC	chr3R	833905445	SECCE3Rv1G0198610.1	Ataxin-3, putative, expressed			0.040328838	0.041899578
GYD	5201150|F|0--12:G>C	TGCAGTCGGTGGGCGGCTGCTGGTTGTTTAGAAACTTGGAGTAGAGCATTGCAAGGTCGATGGACGAGC	chr3R	852527466	SECCE3Rv1G0200330.1	Dof zinc finger protein			0.040264172	0.148076098
GYD	3730027|F|0--31:C>G	TGCAGTGCTGGTGCCTCAACTTCCGCGGCCGCGTGACCATCGCCTCGGTGAAGAACTTCCAGCTGACCG	chr3R	853944064	SECCE3Rv1G0200480.1	Tubby-like F-box protein			0.038771151	0.092472703
GYD	100018665|F|0--65:C>G	TGCAGCTGCTCGTGCCACCTCGGGGGCTTGTTGCGGAGCACCAGCGGCCTCTCCTTGACCTCGCCCTCG	chr3R	853944067	SECCE3Rv1G0200480.1	Tubby-like F-box protein			0.019851493	0.132248629
GYD	3597801|F|0--45:C>T	TGCAGCAGATCCTCCGCGTCCGTGCTGCTGTGGACCCCCTCCACCCGCGCCGCCGCTTCTCCCGTGAGC	chr3R	854680420					0.04227573	0.061635565
GYD	100064113|F|0--25:G>A	TGCAGGGGCTAGCCATGCTCACCCTGTCGACGGTGCTCGCGCCTGGAGAGCGACCAGGATGCGCAGGCA	chr3R	859680051	SECCE3Rv1G0201070.1	Protein NRT1/ PTR FAMILY 5.5			0.039798109	0.051938375
GYD	100085305|F|0--49:T>C	TGCAGGCGGCTCGTCGGTTGGAGCCACCCGCCGGGATCGTGCCGCGGCGTGGTTCCCGGCTGATTCGTC	chr3R	861544744					0.041827315	0.045903906
GYD	100074729|F|0--32:C>A	TGCAGGCTACCCACGGGCGGTCCGAAGAATTTCTCTGCGCGGCTGCACACACAAACGACGGCGATGCCG	chr3R	862501588					0.043803946	0.016884801
GYD	5208104|F|0--30:G>A	TGCAGCTGTATTAAGTAGGTTTTCTAATGAGCCATGTTTGTTCAGTAGTTTAACCGCAGTCTTGCGACC	chr3R	863590617	SECCE3Rv1G0201410.1	5'-3' exonuclease			0.048924551	0.059649708
GYD	100100472|F|0--32:T>C	TGCAGCGCGACCCACTTGCCGCTGCCGCGCGGTACCTTGGCCTGCGTGATGTACATGGTGACGGGGAAG	chr3R	867211893	SECCE3Rv1G0201750.1	Amino acid permease			0.01358027	0.087324459
GYD	5217455|F|0--31:G>C	TGCAGTGCGTGTTGCGGGTCTTGGCTTCCGTGGACGGCGCAACCCATGATTGTACGGCGGCGTGGTTAG	chr3R	871439684					0.034325179	0.09449026
GYD	100019891|F|0--12:C>A	TGCAGAGTTTGACTGTGCATGCCACTGTCTGTGCCCAATACTTGAGCCGAGCTTTCACCTGGTCTGGAT	chr3R	879093657	SECCE3Rv1G0202910.1	DUF1685 family protein	0.0338121	0.0382044
GYD	3740743|F|0--16:G>C	TGCAGGCGTTCGCCGCGGCACCAGATGCGACAACAGCGGCCAGGCTGGAGCAGGCGGCTGCGGCGTTGG	chr3R	881682736	SECCE3Rv1G0203210.1	Microtubule-actin cross-linking factor 1, isoforms 1/2/3/5			0.045021539	0.051795956
GYD	100014560|F|0--34:C>T	TGCAGAGGATATGAAGAGCAACAGAATCAGGCATCTGCAACTAGTAAGGGAACTCGCAGTTCATCAGAA	chr3R	884483467					0.040234953	0.025962913
GYD	3745621|F|0--62:A>G	TGCAGCCATGCCAGCGGCCGCCGCTCCCGGAAACCGCGGAGACAACGGCACGACGGCAGCTCATTCTCG	chr3R	884601006	SECCE3Rv1G0203720.1	Serine/threonine-protein kinase			0.028113358	0.116402003
GYD	3362426|F|0--63:T>C	TGCAGCATTCTCAATCTCAACCCATTTGACAAATTTTTGCCACATTGCTGGATTAAACTCGTGTCCCGA	chr3R	897076823					0.045277979	0.040757406
GYD	100163252|F|0--5:T>G	TGCAGTCCACAATGCTACCGCGGTCCTCCGCGGCACTGTGGCGGCTGGTGGTGGACGTACGTCTGGGCG	chr3R	897076826					0.035144443	0.0880601
GYD	100051023|F|0--11:G>T	TGCAGACTGTAGAGTATAGCAGAGGCGTCCCTGCGTGCAGGCACCGAATTGAAGGAGAGAAACACCAAC	chr3R	897192581					0.041794981	0.019273958
GYD	3730773|F|0--40:G>C	TGCAGAGGCAAAGAACCGGCCTCGGCTGGCCGCCGTCGTCGTCGTGCTGATCGACGCTGAACTCCGTCA	chr3R	900011474	SECCE3Rv1G0205400.1	NAC domain protein,			0.017343136	0.156943532
GYD	3596679|F|0--44:T>C	TGCAGCCTCTTGCTCACCGCAGCACTGGTCCTAGCGCTGAGCCATGGAGCCCTCGGTCATGGTGGTGCC	chr3R	900404863					0.012840576	0.179803898
GYD	4489696|F|0--20:G>C	TGCAGCGCGTCCACCACGGTGCCCGGCGTGAGCCGCGACCCGATGGCCTCCTGGCACCACCGCTTGAGC	chr3R	902570801	SECCE3Rv1G0205800.1	BTB/POZ and TAZ domain protein			0.024386796	0.094588955
GYD	3744890|F|0--68:C>G	TGCAGACAAACAAGGTAATTAGCCGCAGATAACTCCGACCCTACTCGCCACGTCCCCCTCCTACTACTC	chr3R	902638136					0.044287859	0.061071426
GYD	3345418|F|0--31:G>T	TGCAGGAACCAGGTGAGGTAGTACATTTTCCGCCCTTCACACGCACAACAGAGCAGAGCATGATGAGTA	chr3R	903520146					0.020428183	0.119223967
GYD	3745910|F|0--39:A>G	TGCAGAACTCGACGCAGACCGGTGCCTAGCATGACCTCCAAGAGCCGATCAAGGCCTACATGGACTGAG	chr3R	903522067					0.011838457	0.151612222
GYD	100019825|F|0--41:C>T	TGCAGGCCGGCCTCGATGTTTTTGGCGATCAGCGCCGGGACCTCGCTGATGAGGCCGAAGGTCAGGCCC	chr3R	903952877	SECCE3Rv1G0205970.1	Chalcone synthase			0.046122165	0.045035663
GYD	100016748|F|0--33:G>A	TGCAGCACTCCCAGCTTAGGCAGCTCGCAGCTAGAATGACGCTATGCTTCGAATTAGCACTGCATACCT	chr3R	906967329					0.013710693	0.041622922
GYD	100004353|F|0--40:C>A	TGCAGCATGCCTTGTATGAAGATGAACATGATTATGTGCCCTTTTCACTATGTTTGAACAGATTACTGC	chr3R	906967332					0.014994187	0.040181979
GYD	3597319|F|0--41:G>C	TGCAGGTGGTGGTTCTGCACCCAGGTGAGGATGAGCTTGAGGAGCTGCATGGTGCCCTGGCGCCCCCCA	chr3R	908133038	SECCE3Rv1G0206350.1	Transcription factor viviparous 1			0.035899379	0.086214568
GYD	3595218|F|0--21:T>C	TGCAGCGATCGGGCTGCATCGTCATGCCGCCGCCGTGCCACATGGCCAGTTGGAGGAGGTCGGCGCCGC	chr3R	910072083	SECCE3Rv1G0206640.1	MADS box transcription factor			0.018210405	0.137888783
GYD	100027826|F|0--48:A>T	TGCAGCAGCTTCATCCGCTGGCTGATCTTCTCTCTTCTCACCTGACCAACAGAAGCAGAGCATGAGAAA	chr3R	912772796					0.049395637	0.076988538
GYD	100027833|F|0--37:C>T	TGCAGATCTTGCCAGAATGCCCCGACCTGCACACACACGTTTGCCATCACAAATTGTTCATCGTCGACA	chr3R	912773631					0.048924551	0.017006229
GYD	3746132|F|0--5:A>G	TGCAGACCATGTTGCATCAACTGTTTTGCGCCCTGCATTTAGGTGATGATCCATCCACAAGCTCTGGGT	chr3R	917530851					0.046425801	0.038653588
GYD	5223292|F|0--13:A>G	TGCAGGCAATGCTAGCGTTCGGCAAGGCGGCGCACGCGGAAGGCGTGCGCTACATGGACATGGAGGAGG	chr3R	918876823					0.046425801	0.080778923
GYD	100072122|F|0--58:C>T	TGCAGATAAAGCTGGTGTTCCTGGACACGGCGCTCTTCGACGGCTTCTGCGAGTACCACGGCGAGATGG	chr3R	923471012	SECCE3Rv1G0207670.1	Glycosyltransferase	0.0321704	0.0617566
GYD	100125657|F|0--12:C>A	TGCAGCTGACGGCGGCCGTCAAGGACCGCGCCAGGGACGTGCTCAGGAAGCTGGAGAAGGTCAGGGCGT	chr3R	925159137	SECCE3Rv1G0207900.1	Transcription initiation factor IIB			0.028270216	0.141424606
GYD	3587902|F|0--30:A>G	TGCAGGTACCTGTCTCCTCTCCCATTGACGAGATGCACAACCGCAAACTGAATCAGTGCAAAAATAAAG	chr3R	925675207					0.032120051	0.064045257
GYD	100182962|F|0--59:C>A	TGCAGGATGGAGGATGGGGACGGCGAGGCGGCGCGGCAGGCAATCGCGGCGAGGGTGCGCGGCGGGGAC	chr3R	938679543	SECCE3Rv1G0209410.1	Chaperone DnaJ			0.041722713	0.048463778
GYD	100039850|F|0--58:A>C	TGCAGGCTACGCGCCACATATGGTAGTATTGTACACACACACGGGCAAACTGTTGGTCAAAGTGGATCC	chr3R	939379057			0.0421411	0.0261812
GYD	100046898|F|0--58:C>A	TGCAGTTGACGACGAGTATGTCGATGGTGTCAAGAGAGACGTTCGTCTTGGAAAACAGCTCGTCCATGG	chr3R	944344202	SECCE3Rv1G0210630.1	3-ketoacyl-CoA synthase			0.046500394	0.02564227
GYD	100022131|F|0--66:A>C	TGCAGTTGTTCGTCGCCACAAAACATCTCCACTTGTGCTCCACTCGGATGGGCTCCTGTTTCATGAACC	chr3R	948210946	SECCE3Rv1G0211230.1	FBD-associated F-box protein			0.038058028	0.042687794
GYD	100014545|F|0--25:A>G	TGCAGACTCATCGGAGAGAAGCGGCACCACGAGGGGGTGGTCGAATCTGCCGGCGTGGAAGACCTCGAG	chr3R	954837278					0.043651766	0.076007636
GYD	100056919|F|0--64:C>T	TGCAGATTTCCTTGATGCCATCCATGCATACATGGATGTTGATTCGTGGCTGGATCCACCTTGGCTACG	chr3R	962186750					0.033684151	0.137126815
GYD	3744791|F|0--41:G>C	TGCAGCGACGTGATGGCGCCGACGCAGCCGTAGATTGGGTCGCGCACGCGCGCGTTCGCCTCGTACACC	chr4R	8418778	SECCE4Rv1G0215940.1	LOB domain protein			0.034325179	0.170570313
GYD	3600238|F|0--58:G>A	TGCAGAGCAGGGCAGAGTCTGGCCGTGCGACGCAGGAGGCCTATCTATTTATCACACTGGCCAGGCAAG	chr4R	8594529					0.039369978	0.058893427
GYD	5215420|F|0--14:A>G	TGCAGAAGCCCAGGACTCCAGGGAGTGGCAGCGGCAGCATCATGAAAATGTGAAAAGTTACCACACACA	chr4R	9829129					0.034461418	0.082616805
GYD	100053938|F|0--57:A>G	TGCAGCTCCTTGACGTGCCTCGTCGCGTCGGAGAGGATGGTCGCCTTGTCCATCTGAATCAATAATCAT	chr4R	11069574			0.0304162	0.0325778
GYD	100030487|F|0--58:T>G	TGCAGTTTTTCGTGCTGTGCCCATTAGACTATTAGTCCAATTCGAAACCTGTCGCTCATACACTCGATA	chr4R	12008841			0.0219602	0.0402858
GYD	3362268|F|0--63:C>T	TGCAGTGAAGTCGTTCATGAGGAATCAGGTCATGCCCTGAAGGTTCCATTTCGGAGAGTCCATCTGACC	chr4R	12192146	SECCE4Rv1G0216700.1	Phosphomethylpyrimidine synthase			0.041606612	0.101394038
GYD	5037662|F|0--14:C>G	TGCAGTCCCTGGAGCAGCAGCGCGTCGGCGAGCACCTTGTTGGCGGCGTCGGTGGGGTGGAAGCCGTCC	chr4R	14256290	SECCE4Rv1G0217060.1	GDSL esterase/lipase			0.044762856	0.058302306
GYD	100017629|F|0--57:G>A	TGCAGAGCGTGACGTAGGCGTAGCGCATAAGAAACCTACACGTGATCTAAAGAAAAGGAAAAACTACTC	chr4R	17330773			0.0356856	0.0604696
GYD	100077792|F|0--14:G>A	TGCAGCTCCACCCTGTCGCGATGGGAGCGCCGCCTGGGGCTCAGCCTTTCCCCCGTCGCTGGCTTCTCC	chr4R	18409833			0.0382503	0.0542229
GYD	3596689|F|0--62:G>C	TGCAGCATGGAGGCGACGACGTCGGGCAGCTGGCGGCGGAGGAACCGCGGCTCCAGGCCAGCGAGCTCA	chr4R	21072645	SECCE4Rv1G0218230.1	Importin-5			0.043068413	0.048754683
GYD	100107590|F|0--16:T>A	TGCAGCTGACCATTTTTCGGAAGACGCCAAGAGCATTGTGGTGGAGCTCATTGCGCACAAAGCCAGAAA	chr4R	21385085	SECCE4Rv1G0218290.1	Pentatricopeptide repeat-containing protein			0.048924551	0.090332802
GYD	100181633|F|0--64:G>C	TGCAGGCGTCGGGGCCCGGCTCCTCGAAGGACGGCGCGGTCACTTCTGGCGGCAGTCAAGCCGGGTCCG	chr4R	24467431	SECCE4Rv1G0218780.1	Beta-glucosidase			0.030189378	0.18210237
GYD	3908217|F|0--59:G>C	TGCAGCAATCTGAGACCAGCCCGGCACAGTAGTTATTCAAATGTGCTGATTGATTCCCTGATCGATCGG	chr4R	28012211					0.048924551	0.054116188
GYD	100041843|F|0--22:A>G	TGCAGACGATGGAAACTGAATAATTCAGGTAAGATTGAAAAACAACTACGGGAGAACTAAAGGATCAAA	chr4R	37181060					0.0440894	0.045979465
GYD	3743908|F|0--48:C>G	TGCAGAACACGGCCGGCGCAAACAAACGAACCGCGCGCGCGTACGCTTCGCACCCACCTCACGTTCACG	chr4R	42046288					0.046265509	0.087829094
GYD	100074440|F|0--67:T>C	TGCAGCGACCGTGTAGCGTATACACACCGTGCGTCTCTAGGCTGTAGCCCCGCTGTAACTTTTGGTGTT	chr4R	51928630			0.0361277	0.0347058
GYD	5222736|F|0--27:T>C	TGCAGCTCGGCGCAAGGTCGGCGATGGTAGCGAAGCGCGCAAGCGGCTCGGAGGAGGCGAGGCGTACCG	chr4R	53348929					0.033684151	0.106805968
GYD	100034393|F|0--30:A>C	TGCAGCGTGCAGCATAAGTTGATCCAGAAGATGGCCTTCTCCGCCAACCCCACCCTCCAGGACCACGCG	chr4R	53510759	SECCE4Rv1G0222060.1	F-box family protein			0.046930884	0.024189141
GYD	3346340|F|0--66:C>A	TGCAGATGCCGCAGTCTTTGCAGTGGTATTGCTCCTTGTCAACCTGCACAGCAGCAGCAAGATCCCCAT	chr4R	54277520					0.045449789	0.036387927
GYD	100017581|F|0--61:G>T	TGCAGCGCCTCCGCCTTCACGCGCTCGTCTCCCATCCCGGACGGCCGGCGCTGCTTCTGCTGCCGCGGC	chr4R	55992728					0.035121829	0.072506791
GYD	100012717|F|0--41:C>G	TGCAGACGATCGAGTCGGCCATGATGGTAGGCAATGCCTTACAGGAGACATAGAAAGCTCTTTCATCGA	chr4R	55998898	SECCE4Rv1G0222320.1	F-box family protein	0.035067	0.0564629
GYD	100088983|F|0--13:G>T	TGCAGCTCCGCCAGCTGAGTCGGGAGTGGAGGGACTCCGAACACTCCCTTAATTAACATGATTGGCTCC	chr4R	87892921					0.019843547	0.153468477
GYD	3906981|F|0--13:T>G	TGCAGCTCCGCCATCTGAGTCGGGAGTGGAGGGACTCCGAACACTCCCTTAATTAACATGATTGGCTCC	chr4R	87892921					0.025773635	0.073838435
GYD	100009481|F|0--35:T>C	TGCAGTCGCTTTAGCTTGCTTGACACACAACGGCCTAGCCAAGTCAGCTACTGCTAGGGAGTTTGTTCC	chr4R	102455864			0.0321704	0.0704593
GYD	100013194|F|0--30:T>C	TGCAGATCTGCTGTGTCCGCTGGCTGGGCATTACTTGACAAAGGACGCTGTATTCCAACAACAAAAATG	chr4R	110160677					0.033684151	0.12141904
GYD	100015987|F|0--47:T>G	TGCAGCAGAACTCGCTAATATGTTACACAAAAAGCTCTATGAACAGGTGGCAAAAACGAAGGCAGTCGT	chr4R	118079455					0.041676209	0.043821464
GYD	100045730|F|0--43:G>C	TGCAGCTGAGGGTGGAAAAACATCGGTAAGTATGTAGCTTATTGCTACATGATCTTGAATCTCTGTGCT	chr4R	136305291					0.034900561	0.098925856
GYD	100029852|F|0--33:T>C	TGCAGATGCATGCGGTCACGATCGTGTCTGTTTTGAGCCTTCATTTGTTCGTCTACAACCACACTTGTC	chr4R	142687642					0.048017037	0.134378983
GYD	100055200|F|0--66:C>T	TGCAGTTCTTCCTGACCTGTCCGCTGGACCCCGTCAGCGGCGTGATGTCCCCCATCTTGATCATCCCCA	chr4R	151067992	SECCE4Rv1G0229560.1	Peroxidase			0.035121829	0.03737011
GYD	3346293|F|0--57:A>T	TGCAGATCCGAAAGAAAATCTTGCTACAGATTGATATTGTAATCTGACGACATGGATATTTACTTTATG	chr4R	152907005					0.046213484	0.035855228
GYD	5046898|F|0--41:G>A	TGCAGCACCGGCGGCGCCTGGCAACGCTTCACTGCAACCTCGCCGTGCCCGGCAGCGGCAACCTCACCG	chr4R	154437119					0.028760432	0.139310529
GYD	3364037|F|0--52:T>C	TGCAGGCGAGCCATGGTAGGGTTTGTTGCGGGAGGCACAAAGCCACACTCATTTGTCTTCAGGATTACA	chr4R	154507896					0.034972003	0.051525304
GYD	100006543|F|0--38:G>C	TGCAGGTACATCTGGAGCGTGTAGGACCAGACACTGGAGAGCATGATGGGGATGTACCAGAGGGCGATG	chr4R	163122629	SECCE4Rv1G0230360.1	Protein DETOXIFICATION			0.049145963	0.038367066
GYD	100009075|F|0--40:C>T	TGCAGCGCTTCAGGGCTGAGCTTAATCTGAGCGCATGTATCGTCGTCCCAGCTGCGTCGGAACGGTTGC	chr4R	174209068					0.035121829	0.03737011
GYD	100035335|F|0--19:T>C	TGCAGACCCTGGAATAATGTGGTCGAATCTTGGAAGGGTCGATCGATTGTGTCCATGTTTAGTCGTCGC	chr4R	191357096					0.035144443	0.037654405
GYD	100158662|F|0--44:T>C	TGCAGTGGACACGGTGGTGGTTTTCCCGGCGCTCGAACGCCCGCTGCACGAACGGCAAATTTTCTCCGC	chr4R	229686681					0.03882013	0.083402656
GYD	100020221|F|0--47:T>C	TGCAGAAACAGCTATCTCAGCCGCAACCTCATGTTTCGTGATTCGTGTTGGACTGGACAAAGGAAAAGG	chr4R	232299707			0.0255805	0.0719423
GYD	100020120|F|0--49:G>C	TGCAGGCTGCGGCCGCGCAGCCGGGGAGCCGCATCGACGCCGGCAAACGGGTGGGGCCTGCACGCGCTC	chr4R	270315656					0.04890562	0.049151069
GYD	100021213|F|0--65:C>G	TGCAGGTTGTGCTCGTGGTCAAGCAAGCGACGATGGAATCTCGAGGAGGTAGAGGAGGTTCAAGACGAT	chr4R	293892226					0.044287859	0.0422431
GYD	100043183|F|0--28:C>T	TGCAGTGCATTCAGATTCAGTCATGGAACGGGATGAGATGGAGATGGTGCCTCACCTCTATATTTGGAG	chr4R	469206914					0.038924224	0.103831646
GYD	100007744|F|0--17:A>G	TGCAGCTCAAATCCCTCAGCGGATTAAATTGGGCGCAGAAAGAGCAGTGCAAATTGCCGCTGGATGCAC	chr4R	499468393					0.041449809	0.047319835
GYD	100033669|F|0--25:G>T	TGCAGGTAACAATGGTGCTGGCAGTGCCTACCAGCCACCTCCAACAGACAACAATGGCGTTGGAAGCAC	chr4R	502958115	SECCE4Rv1G0243470.1	Pathogenesis-related thaumatin family protein			0.047544983	0.078801041
GYD	100051730|F|0--44:G>A	TGCAGGGCCATCGAAACACATTTCATGGACTCGATGTAGGCGATGTGAGAGGAGGCAAAACGGTTGCGC	chr4R	504187173	SECCE4Rv1G0243600.1	DUF630 family protein (DUF630 and DUF632)	0.0476228	0.0375205
GYD	100026550|F|0--64:T>C	TGCAGGTACAAGAATTTGATGTGTACAGGTCTGAAATTTCCCGGTCAGATTGAGCACTTGTATCTCTAC	chr4R	510798280			0.0321704	0.0323039
GYD	5202601|F|0--33:T>G	TGCAGGTCGTCTTCCTCCTCGGGGTCGCCAATCTTTTTGGCCATGGCTCCTCCTACTTACCGTTGTGCT	chr4R	513747795					0.035444055	0.047908655
GYD	3733505|F|0--13:C>G	TGCAGAGCTAGGTCTATAGAGTAGCTGGCGGCTAGGCGCTAGTTGCAGGAAGGAAAGGTTGGATGGAGC	chr4R	513747798					0.036590815	0.057467144
GYD	3363349|F|0--60:T>A	TGCAGTAGGACGATTGGAGATCCTCGAGCCATGCATGCAAAGTACATGCCCTGAGAAGGGTACAAACAC	chr4R	513751298					0.035665402	0.047709096
GYD	100009398|F|0--58:C>G	TGCAGTGCTTCTTCGTGGCCGCCAAGTGCATCTGGCTGCTCCACCTGCTGGCCTTCTCCTTCAGCCCGC	chr4R	516513075	SECCE4Rv1G0244520.1	IRK-interacting protein			0.030675526	0.235344114
GYD	100076131|F|0--7:C>G	TGCAGCACCTGCTCCGCCCACGGCCACGACCAGCTCAGCGTGGACACGATGCAGCTCATCTTCTGGTCG	chr4R	516513078	SECCE4Rv1G0244520.1	IRK-interacting protein			0.02456655	0.04526189
GYD	3355498|F|0--20:G>C	TGCAGGATCCCCGTCGCCACGGGCATCATCATCACCGTGCACGCCGTGTTGTGGATCCACATGCTCACG	chr4R	519097932	SECCE4Rv1G0244680.1	Tonoplast dicarboxylate transporter			0.043599444	0.038731383
GYD	3352486|F|0--65:A>T	TGCAGGACGTAAGAGGACTGTTCAGTTCATGCGTAGCAGTTTTTGCCACCTTTTTATTTTATTATAGGT	chr4R	520927979					0.020983854	0.076541146
GYD	100021141|F|0--59:A>G	TGCAGGGTAACATTGGTGAACAGCAGCAAATTCCTAGTTACCTTCTCCAATACAGATACACCCAGAAAC	chr4R	521533515	SECCE4Rv1G0244840.1	Protein kinase family protein	0.0429556	0.0168721
GYD	100007717|F|0--10:A>T	TGCAGCAAAAAACTTGTGAACGCAAGTTCATACAGCTAGAGCCTAGAAGACAGTAACATATCGCATCTG	chr4R	522211696			0.0473866	0.0173918
GYD	100105507|F|0--14:T>G	TGCAGCAAACTGACTGTCTTTGACACGCAGCTTCTCCAGTTGGTCTCATTCGCCTCGAGCTTGAACTCG	chr4R	524901842	SECCE4Rv1G0245100.1	Disease resistance protein (TIR-NBS class)			0.048712385	0.035225795
GYD	3360648|F|0--20:T>A	TGCAGGATCTCCCCCTCCCCTCCCGAGCAGTACTCCATTGGTCCTACAGGTCTAGGGTTTTGCCTAGGC	chr4R	524904029					0.044165858	0.039573569
GYD	3363466|F|0--6:T>C	TGCAGCTGCATTCAAATCAAATCCTACATCTCTCACCAGGAAACAAATACTCGTTGTTTCTCTCTCTAG	chr4R	524904139					0.034900561	0.054482003
GYD	100014550|F|0--66:T>C	TGCAGACTCGGACGGTGCCGCCGTCACGCTGCCGAACTTGGGCGTGACGTAGGAGCCCGGCGAGAATAT	chr4R	524955408	SECCE4Rv1G0245110.1	Transposon Ty2-LR2 Gag-Pol polyprotein			0.032120051	0.063713547
GYD	3730107|F|0--30:G>A	TGCAGCATTCTCAAGATCTGGAACCTGAACGCGCACTCCGGCGTGATCGGCGCCTTCAACTGCCAAGGC	chr4R	528692567	SECCE4Rv1G0245390.1	Alkaline alpha-galactosidase seed imbibition protein			0.02657458	0.063544266
GYD	3362773|F|0--46:C>G	TGCAGAGAGATTGCACATCGCCTCATTACTGGGCTTTTGTTGGTGTCTAGACGAGAGAAAGAGGAAGAG	chr4R	533127590					0.047942652	0.033602734
GYD	3356576|F|0--27:T>C	TGCAGTATCCTTCTCCAACTCCACAGCTGGCAGAGCCGCACCGACCACCGCCGCCAGCGCGACAAAGGC	chr4R	543826780	SECCE4Rv1G0246400.1	Galactan beta-1,4-galactosyltransferase GALS1			0.047486813	0.045971552
GYD	100023519|F|0--32:A>C	TGCAGAACTGCACTGAACATACTGTTAACTTTACCATGCTCCATAAGACCATAACAACAGAACTTGAGA	chr4R	556616349			0.0347063	0.0382324
GYD	100057072|F|0--22:G>A	TGCAGATCGTGTTGGAGACACAGCAAACTCGGGTAGGGGCACCTTGTTGATCTGAATGTCGTTGGCGAT	chr4R	559475668	SECCE4Rv1G0247470.1	cysteine-rich RLK (RECEPTOR-like protein kinase) 19	0.0466693	0.0166378
GYD	100032995|F|0--53:T>G	TGCAGCTTCAGCGAGTATGGGTGTGGTCCAGAAGTGATGAGCTCCTTGCTCTTTGCACCAGATGGGACT	chr4R	564104996	SECCE4Rv1G0247810.1	Transmembrane protein C9orf5			0.042787218	0.032370137
GYD	3595888|F|0--59:T>C	TGCAGCGGGCGGAGGAAGTCGGCGAGCAGCAGGTAGAGGCCGTAGAGCACGAGCAGCGCTGTGGCGAGC	chr4R	564105797	SECCE4Rv1G0247810.1	Transmembrane protein C9orf5			0.040399652	0.063364842
GYD	3342761|F|0--18:A>G	TGCAGGACGTTGGCTCTTAGGACTGGATCACACAGGTTGTCACGCTCCACCTCCTCGTAACAGACACTG	chr4R	564591955					0.039213882	0.05910984
GYD	100067125|F|0--20:T>C	TGCAGGATATGTGTGCTGACTCCTCCTCTGAATCATCGCGCTGAATCTCACTGTCTCGGCCTCCGCACC	chr4R	565242631					0.033696927	0.114886651
GYD	3889514|F|0--9:T>C	TGCAGCTGATGCCTTGCCACCCCTGGCACGGGGAAACCGAGAGGTCCCACTTCAGATGGTTTCCCACAG	chr4R	570329290	SECCE4Rv1G0248300.1	Receptor kinase			0.041722713	0.062792152
GYD	3595819|F|0--34:A>G	TGCAGCAGTCGCATCATCTCCTCCTCCACGCGCGACTCGTTGCCGATGACGGAGTCGAACACCTCGGAC	chr4R	570330958	SECCE4Rv1G0248300.1	Receptor kinase			0.041722713	0.062792152
GYD	100066730|F|0--60:C>T	TGCAGAGGCGGCGCGTCTGCCATGAAGGTGCTTGGGCCAAGGCCCGTGAACGGCATGGTTCCGCCGCTC	chr4R	571651326	SECCE4Rv1G0248410.1	Dof zinc finger protein	0.0282008	0.0476083
GYD	3742700|F|0--60:T>C	TGCAGAGGCGGCGCGTCTGCCATGAAGGTGCTTGGGCCAAGGCCCGTGAACGGCATGGTTTCGCCGCTC	chr4R	571651326	SECCE4Rv1G0248410.1	Dof zinc finger protein			0.022139151	0.0720834
GYD	100006025|F|0--19:A>G	TGCAGGACACAAGTGCAGAATGAGAACACCCCAAACTAAAAAATCATGGGGAAGAGCACGTGACAGCAG	chr4R	574641933			0.0287616	0.0372827
GYD	3888499|F|0--53:T>C	TGCAGCCAGCCAGCCGCTGCTTCTGGCCACTGTAGCAAGGCAGATCCCTGAACTAGCGGATGCAGAAGC	chr4R	575591848					0.022532037	0.074131107
GYD	4092712|F|0--20:C>T	TGCAGCCGACGAGGCGGCCGCGCTCGTAGAACAAGGACGGCCGGTAGAACCAGCTGCCGGCGGAGACGA	chr4R	575776175	SECCE4Rv1G0248800.1	Trichome birefringence-like protein			0.025213359	0.070559723
GYD	3591394|F|0--37:T>C	TGCAGGCCGTCACCTACTACCTGCCACGCCTCCTCTCTGGCGAGACGCTGCACTGCGCCGACAAGCTCA	chr4R	577312123	SECCE4Rv1G0249050.1	NAC domain-containing protein			0.042787218	0.05265638
GYD	3749857|F|0--63:G>C	TGCAGCCGACTGGCCGTTTCAAGTGGGCCCCCAACGGATGCGATTCCAGAGAAAAGGGCCCGGGACACC	chr4R	579561475					0.023581597	0.097825301
GYD	100014176|F|0--29:T>C	TGCAGGTCAGATTGGAATTGGTTTGGTGGTACTAACCATCGGCAGTTGAGCATAAGCCGTGCAGAACCC	chr4R	581851808			0.0287365	0.0746045
GYD	3597688|F|0--49:C>T	TGCAGTGCGACAGCAGGTGCAGGTACGCGCTCGTGGTGTCCACGGAGATCCTCACCTCGGATTACTACT	chr4R	582450816	SECCE4Rv1G0249380.1	3-ketoacyl-CoA synthase			0.041827315	0.043623478
GYD	3362923|F|0--32:C>G	TGCAGCCTCTTCGCGCCCATCCCGTCCTTCACCGACATGATCATCCGCAAGTACAAGATGCGCAGCGAC	chr4R	582715890	SECCE4Rv1G0249420.1	3-ketoacyl-CoA synthase			0.030756877	0.081726107
GYD	100040548|F|0--30:G>A	TGCAGGTTTGTTGTTTCCATGTTGCGCGTGGCTGGATTCCATTGCATGCGCCATTGATGCATAGATGCA	chr4R	583012646			0.0321704	0.0717011
GYD	3743149|F|0--5:G>T	TGCAGGATCCACCGGAGAGAGCCCCCGCCCCCACCGCCGCCGCAGCAGCTTCAGCGGAAAACCGCCGAG	chr4R	584394843					0.036907805	0.049597289
GYD	100003442|F|0--7:C>A	TGCAGTTCCCTGATTAAGCAAGCACTGGGGAACTCGACTCAACTGATCATCAGATTCGACATTTTTGGG	chr4R	587241432					0.046787584	0.014884264
GYD	100020088|F|0--52:G>A	TGCAGCAGGGGAGGAGGCCATCTATGCCCATATCCTAAAGAAGTGTGCCCTCGCCCGAGGAAAACCAAG	chr4R	591591018			0.0321704	0.039072
GYD	100024709|F|0--65:A>C	TGCAGATTAATTGTCGTATTTCTATCCTTATTGATCATGAAATGTAGTATACTTACATGCAACGTAAAT	chr4R	595903773					0.02198652	0.035804046
GYD	3593831|F|0--65:G>C	TGCAGGCTCGCTCTTCGGTGCTGCCACAACCTGGCCGGCCTCACCATCGACGTGTCTAAACTCAGGGTC	chr4R	601839003					0.016012695	0.151604433
GYD	100053454|F|0--50:C>T	TGCAGCGCGACAGACTCTGAGCGGAGCAGAGGCGGAGATGGCGTACAAGCCAGTGGCAAAGAAGCGGCG	chr4R	602407885					0.025773635	0.039855689
GYD	100067643|F|0--10:C>G	TGCAGCCCCCCCTGTACAAGAAGACCTTTGGGATTTCAACAAATACATTGGTTTCGAGGAGCCCGTGGA	chr4R	608345122	SECCE4Rv1G0251840.1	Starch synthase, chloroplastic/amyloplastic			0.044051003	0.067077451
GYD	100081275|F|0--42:G>C	TGCAGGTTCGTTCAAGCAGCATGCAGCCAAAGGGACGCCACGGCGCCGCGATAAAGCGCGGCCGGACGT	chr4R	610393754					0.044306631	0.04525773
GYD	100124410|F|0--5:G>C	TGCAGGAGCCACTCGATGGTCTCGCCGTCCGTCTTGTGCCCCAGCTCCCGCGTCAGCTGGAACACCCGC	chr4R	612457677	SECCE4Rv1G0252120.1	TCP transcription factor			0.036440481	0.054171292
GYD	3344869|F|0--24:T>A	TGCAGCCCAGAAAGCTAGGTGGGCTTTTTTTGGTCGGCCCACACGTTAGGTTCAGGATAATTTAATTTA	chr4R	618659633					0.015137994	0.146170724
GYD	3344869|F|0--33:T>C	TGCAGCCCAGAAAGCTAGGTGGGCTTTTTTTGGTCGGCCCACACGTTAGGTTCAGGATAATTTAATTTA	chr4R	618659633					0.049730133	0.048913795
GYD	3906340|F|0--28:A>C	TGCAGAACTACTATGCTCAGCTGTACGCAGGGCTGGCGTCGCCGACAGGGCCACCGCCCTACCATCAGT	chr4R	620522190	SECCE4Rv1G0252990.1	RNA-binding protein			0.023581597	0.096298776
GYD	3741073|F|0--19:A>C	TGCAGCGAGCAACAACAACAACCATGCTCTTCTTGACGCGGTCCGTGTTAGCAAAAACACTTGTTAATT	chr4R	623899748					0.035378622	0.057199154
GYD	100001054|F|0--9:A>T	TGCAGGACTACAGAGATTCACATATCGACACAAACAGCTAGGCATAGATCGATCCATCTGTCAGGCAAC	chr4R	628309319					0.019851493	0.033696065
GYD	3352468|F|0--53:G>T	TGCAGTCCCAATGTCCCATCCTCTACCTACAATGGCTGCAACGGCTAACACCAGCCTACTGACCACACT	chr4R	630094440					0.035136765	0.058946338
GYD	5043556|F|0--59:A>G	TGCAGTTGTCCATTGCCGTACCCCGGAAGTCCAAGGAAAATGAGGTCTGGCCATGGCCGACAGTAGTGT	chr4R	631199408	SECCE4Rv1G0253910.1	Loricrin-like protein			0.019843547	0.092467857
GYD	100164284|F|0--9:C>G	TGCAGCTGCCGCTGGCTGTCAGAGCCCCCCTCCTGGTGGTTGCCAAAGTCCATGGCTCTCGCTCGCGGG	chr4R	635698780					0.044165858	0.038551585
GYD	3593612|F|0--6:C>T	TGCAGTCTGATTACTAGTTGAAGCCACATTCCCACTCGCTTTATCGCCCTGAATTCCTCCATCTTCGGC	chr4R	638004154	SECCE4Rv1G0254440.1	Protein trichome birefringence			0.047583099	0.036147118
GYD	3360149|F|0--30:C>T	TGCAGATACATTTCACATGCTGCAAGTTAACTGTAAGCCAGAACACTGAACATATAGCCACATTCCACG	chr4R	638313125					0.044165858	0.038551585
GYD	3363461|F|0--62:C>A	TGCAGCTCGCAAACATTTTTGTTTCCTGGTCGGAGGCCAAAGCCACTGTGTCGGCATCAACACTCTCGC	chr4R	642770501	SECCE4Rv1G0254900.1	BTB/POZ domain-containing protein			0.017343136	0.103949001
GYD	3588497|F|0--29:G>A	TGCAGGAGCGAGGTGAGGGTGTACTTATCGACACTTCCATCGCCGCATGTCGCCAGCATCTCCTGGAGC	chr4R	643849518	SECCE4Rv1G0255120.1	Pentatricopeptide repeat-containing protein, putative			0.036520458	0.114047664
GYD	3362918|F|0--24:C>T	TGCAGTTGCGCCATGGCAAGGAGGCCGCCTTCCTCCTGTACGTAAACTTTGGAAGAATCGTATTCGTAC	chr4R	650414955					0.049708438	0.0760018
GYD	100022096|F|0--49:C>G	TGCAGTGCTCGCAGCGGAAGCTCTGGCAGTCCTCGGCGATGAGCCGGAGCGCGTCGAGCGCCGAGTAGC	chr4R	655119535	SECCE4Rv1G0256240.1	Transcription initiation factor IIE alpha subunit family protein			0.046425801	0.057222799
GYD	100043028|F|0--52:T>C	TGCAGGTTACGCACGCGACATAGAGATAAGAATTAATTAAAAGTTTATAAAATCCAAGAAAGAGATAAG	chr4R	655376323			0.0392917	0.0409616	0.04249402	0.187428567
GYD	100021947|F|0--18:T>C	TGCAGCTCTTATATAGCGTGTATTTCACTGCGAAGCGGAATATCCTATTCGACGCTCGTTGCGTCAAAA	chr4R	656847171					0.041827315	0.042329291
GYD	100040060|F|0--52:T>C	TGCAGCCGAGGAGCTCGTGGACAAGAATGCCCAGGTGCAAGCCATCATCTCGTCTCAGACAACACCCGA	chr4R	657391992	SECCE4Rv1G0256520.1	Glutamate receptor			0.02096511	0.037314548
GYD	5046585|F|0--21:C>T	TGCAGCAGCCATCAGCGGGGACGCGCAGATTCCGTGAGGAAGAAATAGGCCGGTCGGCGAGACAAGAGG	chr4R	662675057					0.016415671	0.159714043
GYD	100127983|F|0--45:C>A	TGCAGTTTATGCATCAGGGAATTTCTTGTACTCATGGACATCTGACAAATTATATAGGTTCAGTATCAT	chr4R	662675372					0.047284704	0.10458708
GYD	100127983|F|0--61:A>G	TGCAGTTTATGCATCAGGGAATTTCTTGTACTCATGGACATCTGACAAATTATATAGGTTCAGTATCAT	chr4R	662675372					0.03135653	0.120594244
GYD	3362198|F|0--14:G>T	TGCAGGCTTCAAAAGCACCAACATTCTTAAAATGAAGTCGAAGCTCAGCAGAGAACCAAGCACCAACAT	chr4R	662736621					0.019229429	0.107438262
GYD	5216830|F|0--56:C>T	TGCAGCAGAACCTCCAGCCAGCTCGAACCTGCAACAGCGACGGGATCACATCGCAGCGGCGGAGGTGGA	chr4R	664390761					0.019843547	0.079365225
GYD	3884793|F|0--6:A>G	TGCAGAAGCTGATCGTGGAGGCGAGCCAGGGCGGCGCCGACGAGGTCCGCGTCGACAGCCTCCCCGAGA	chr4R	664396029	SECCE4Rv1G0257150.1	BTB/POZ domain-containing protein			0.019843547	0.079365225
GYD	3750358|F|0--15:A>C	TGCAGTAAGAGTGGAATTTTCTTTATTAGACACAACCGACCAGACTAAGCCCGTCGTCATCCTTGCGGA	chr4R	665276752					0.018984976	0.146397085
GYD	100089531|F|0--14:A>C	TGCAGACAATCCATAGGCAGATGTTGAGCGATCTCGGAGCAGCCGTGGCGGTTGCAGGCGATGGCTCCG	chr4R	668295263					0.016415671	0.218156018
GYD	100022396|F|0--33:T>C	TGCAGTTTAAGTTTAATGACAAGCAGGGTTTTTTTCTTTCTATATCAGAATATGTGCCTGGAAGGCCGT	chr4R	670461510					0.023612331	0.11191459
GYD	100082051|F|0--41:C>G	TGCAGTGCTCTGCTGTGGCATCGCCTGATGGGAACCAAGGTCCTGGAGGCCAAGTTCACGGGCACCAAC	chr4R	677422333	SECCE4Rv1G0258350.1	Heparanase			0.031738731	0.059987823
GYD	5046919|F|0--8:G>A	TGCAGAGGGTCGGCACCGGGCTCGTGCTCGCGCTGGTGGCCATGGTGGTGGCGGCGCTGGTGGAGGCGA	chr4R	679879942	SECCE4Rv1G0258850.1	Protein NRT1/ PTR FAMILY 5.5			0.040094758	0.054521993
GYD	5137762|F|0--5:T>C	TGCAGTTTGACTTGGCGGGCTTGACTGGGAGACGCGTGCCTTCCAGAGGAAGGAAGCTACGCATTGCCG	chr4R	679911224					0.049481227	0.031670321
GYD	100080630|F|0--52:C>G	TGCAGAGCGTGGCTTGACAGACGTGACAAGACAGAGGTGCCTTCGAGACGAACCTGGCTAGCATTGCAG	chr4R	680978550					0.03135653	0.14467624
GYD	100066187|F|0--13:G>C	TGCAGCGTGGCTGGACTTGAGCAGGTGCCTTCCAGACGAAGGTAGCTGCATTGCCCGAGGACCATGTGC	chr4R	681573247			0.0499504	0.0143392
GYD	3598031|F|0--51:G>A	TGCAGCGCCGTGTGTGGGCATTTACTTGCTTCCTTTTTTGCACCCGACTGAGAAAAGACTTTAGCGGTA	chr4R	681769298					0.036907805	0.105614807
GYD	3907431|F|0--13:T>A	TGCAGGGAGGGCCTGGTGGAGGAGGTGGACGCCTTGTTGGCGGCAATGTGGGGGCAGGGATTCTGCCTG	chr4R	685454880	SECCE4Rv1G0259370.1	Pentatricopeptide repeat-containing protein			0.04674739	0.122473842
GYD	3362680|F|0--23:T>C	TGCAGGCACCAATGGCGTCGGTATGCCATATTACATAGATTGACCAAGTAGCATCTCCTTCTGCCCAGT	chr4R	687448334					0.031656097	0.10188115
GYD	3909495|F|0--28:C>A	TGCAGCAGATTGCTGCTATTTCGCACAGCCTAGCGACCGACGAAATAAATTGGGCCGGCCCATTTAGTG	chr4R	687630049					0.034972003	0.081067169
GYD	3597790|F|0--18:A>G	TGCAGGTGTAGGAGGCGCACGTACGCGGCCGCGCGGTCGGGCTCCGCCGCAATCTCCGCCACCTGCCGC	chr4R	688911222	SECCE4Rv1G0259570.1	Telomere-associated protein RIF1			0.024643012	0.101584262
GYD	3908275|F|0--61:G>C	TGCAGGTGGAGGAGGCGCGCGTACGCGGCGGCGCGGTCGGGCTCCGCCGCAATCTCCGCCAGCTGCCGC	chr4R	689059529	SECCE4Rv1G0259610.1	Telomere-associated protein RIF1			0.034299247	0.060929461
GYD	3908275|F|0--8:G>T	TGCAGGTGGAGGAGGCGCGCGTACGCGGCGGCGCGGTCGGGCTCCGCCGCAATCTCCGCCAGCTGCCGC	chr4R	689059529	SECCE4Rv1G0259610.1	Telomere-associated protein RIF1			0.030189378	0.059157915
GYD	100079929|F|0--12:G>C	TGCAGGCATGCAGCTGCACCGGTATCTACGGAAGTCGTCGTCCTCGTCCACGTCGCGGACGCGGTGCCG	chr4R	689063668					0.044096979	0.077028312
GYD	5226762|F|0--6:C>T	TGCAGGCCGCAATGACCAGCTTTAATCTGGCCCAGATTTATTATACAATCATGTCCTATCTCAGCCCAC	chr4R	689064136					0.031104014	0.075108304
GYD	100016716|F|0--68:T>C	TGCAGCCATATCTAATCTAACGCTAGACTTTTAGGTTCAGGTTTTTAACTATCGGCTAGATTGACTTGT	chr4R	696365300					0.02456655	0.070177089
GYD	5202624|F|0--7:A>G	TGCAGGGAGATGACATGGATCCAGTCCGTGGCTTACATCTACCTGGGCGCCACCGCCGCCGTGGAGGAC	chr4R	698800726	SECCE4Rv1G0260820.1	FAD-binding Berberine family protein			0.014583169	0.10134477
GYD	100051715|F|0--68:C>G	TGCAGTACGGTAGAAGCATAATTAGCTGGCGCGACTGGCGGTCAACTAACCATGGGAATGTCGTTGAGC	chr4R	700330481					0.02778709	0.06480442
GYD	3735804|F|0--29:T>C	TGCAGGATAGTGCCCAGTGGCTAGAGTTATCTATCTGTCTCCTTTTGTTATGTAGCTCCTCGGTTAGTA	chr4R	700797771					0.038058028	0.066636588
GYD	100006589|F|0--47:C>G	TGCAGGAAGCGGTCGAACCAGTCGCTTGCTTCCTTCACCATGTTCGCCGTCAACAGATGTTCAACTCCC	chr4R	700950825	SECCE4Rv1G0261310.1	Alpha/beta-Hydrolases superfamily protein			0.039100425	0.055292478
GYD	100163086|F|0--52:A>G	TGCAGGAAGCGGTCGAACCAGTCGCTTGCTTCCTTCACCATGTTCGCGGTCAACAGATGTTCAACTCCC	chr4R	700950825	SECCE4Rv1G0261310.1	Alpha/beta-Hydrolases superfamily protein			0.017343136	0.122454323
GYD	100104251|F|0--45:A>T	TGCAGGCACCACGGCCGCCGCCGGCGACGGCGGCGGCGAAGCTCGAATTAAATTCACTGCTTTGCTCCG	chr4R	702501974					0.019843547	0.180564652
GYD	3593239|F|0--34:A>G	TGCAGCTACGAAATGATACTACTATTGGCCACCTAGAACCTGTCCTCACCAGTGACCACCAAAAAGGGA	chr4R	705276664					0.030189378	0.07978448
GYD	100140405|F|0--39:G>A	TGCAGTGCGGTCCCCAGAGACCCCGCCGGTGCACACGACGCTGCGTTGGCTGCCCGAGCCCAGGCCTCC	chr4R	705513436	SECCE4Rv1G0262010.1	P-loop containing nucleoside triphosphate hydrolases superfamily protein			0.034901185	0.060854153
GYD	3907260|F|0--9:C>T	TGCAGTGGTCGTTCATCTTGATTAATACGAGTAGTATTCAATTTTTGGGTAGATACCGGGAGCAGGAGC	chr4R	706246351					0.049730133	0.048746773
GYD	100192857|F|0--53:C>G	TGCAGGGACAAAGACGAATCGAACATCAAGCTAGGCAAGCTTAGCATAGCATCCTCTAAAAATCTGAAA	chr4R	708178731					0.03143607	0.077613753
GYD	100106192|F|0--7:A>G	TGCAGCCACCTCCTCATGAGGCGTGCCAACGAACCAGTCACAGGGCTGCCGCCCCGGCCTTCTCACGCT	chr4R	710613658					0.047640339	0.039146797
GYD	3349792|F|0--20:C>G	TGCAGGGCATGAATGGCATGCATAGCCATGCACACCTGGTTCTTGGACAAGAAGGCATCATTTTAGTTT	chr4R	713717768					0.042975705	0.053217903
GYD	100053791|F|0--50:G>T	TGCAGGGCGACGCGGCGGCATGCCACAGGAGCTAGATGCGGCATCTGCTGGATGCTCCGTCGTACGCAT	chr4R	714638127			0.0398779	0.0799932
GYD	3595422|F|0--26:G>T	TGCAGCTATCAGAAGGTGCTGGAGCCGCTGGGTTTCAAGGCTGTTTGTATGGAAGACAACGAGCTGGCT	chr4R	718041657	SECCE4Rv1G0263750.1	Thiopurine S-methyltransferase, putative			0.048924551	0.050909279
GYD	3731129|F|0--19:C>T	TGCAGGTCACCCTGCTGCGCCGTGGCGGCATCGCCGTTGGCGTGACCGTCCACCACGCCGCCTGCGACG	chr4R	721646862	SECCE4Rv1G0264670.1	Anthocyanin 5-aromatic acyltransferase			0.03135653	0.080231622
GYD	3904740|F|0--50:C>T	TGCAGGCCCACCCCCTCTCGATCGACGGCGTGCGGCGGTTAGGGCAGGATCCCGAGTCGTACGGAGTTG	chr4R	721850884					0.03072287	0.070843639
GYD	100026979|F|0--30:T>C	TGCAGGTGGCAGCGCAGCGCACAAGATCGGTGATCTCTGGGAGGCCGGCGAAGATGCCGACGAGGATCT	chr4R	722270262	SECCE4Rv1G0264770.1	F-box domain containing protein			0.047869519	0.054385945
GYD	100018645|F|0--57:A>G	TGCAGCTGCGGTGGTTCTGCGAGAAGAGCGGCGTCGTCCTGTTCACGGCCGGGTACAACGACGGGAGGA	chr4R	722271154	SECCE4Rv1G0264770.1	F-box domain containing protein			0.025837981	0.096181143
GYD	100006621|F|0--48:A>G	TGCAGGCGCTTGGGTATAGTATCTATCACCAACACATACATTCACTTAACCCAGCATGACGGTCGGCGC	chr4R	722544317			0.0454971	0.0171042
GYD	100196363|F|0--41:C>T	TGCAGGGACTAGCCGACAGGGCGCGGAACGCGATGTTGCCGCTGGAAATTGTCGAGCTCCCGTTCCCCG	chr4R	725925269	SECCE4Rv1G0265480.1	Glycosyltransferase			0.0440894	0.057796814
GYD	100132748|F|0--8:C>T	TGCAGCGTCGAGATCCGTGCGGAGCTTGCCACACAAAGGGTGCTCACCGTCGCGGATATCTATGGAGGC	chr4R	729352946					0.040328838	0.053983663
GYD	100011750|F|0--45:G>C	TGCAGGCTTAAAATTTGCAGGTATTTTAAGCCTATTACGAGGCGTGATAAATGTACAAATCTCTATTTT	chr4R	730237691			0.0219602	0.0536964
GYD	3365167|F|0--30:G>C	TGCAGGGATTTAATTCGGAGAAAAATGGCTGATCTGATCACACATGTACAGAACCAGCATTCTCTGCAC	chr4R	733195079					0.048825954	0.078312352
GYD	100110091|F|0--67:G>A	TGCAGTGCTCACCGTCTTCGACACACTCAGCGTCATGCTCTGGGTGCCGCTTTACGACCGCGCCATCGT	chr4R	733576955	SECCE4Rv1G0266790.1	Peptide transporter, putative			0.046861216	0.038873721
GYD	5046768|F|0--60:A>G	TGCAGAACCCGCCACCTGTGCTCTGCCGTACCCGCACCGCCCGCCGGTACCAGTACCAAAACCACGGCC	chr4R	735301885					0.047583099	0.057385509
GYD	100086038|F|0--6:T>C	TGCAGTTCTTCTTGGGCATCCACGTCACGCGCGACAAGACCGGCTTCTTCCTCTCGCAGGCCAAGTACG	chr4R	737558720					0.040264172	0.089315734
GYD	100038687|F|0--51:C>T	TGCAGCAGTTGTAACACGTCTTCCTGTTACACATGTGAATCAAGAGCGAGGCATTTCGGGTGGCCAAAT	chr4R	739021913					0.021697858	0.059089771
GYD	100060531|F|0--50:G>T	TGCAGGTGCCCGATTAATTGGTTTTACTGATACAGCAAAGTTTTGTAGGAGTATCCACTTGATTCTTTC	chr4R	739149592					0.042787218	0.083692095
GYD	3596153|F|0--8:G>T	TGCAGGATGCGATAATTGAGATGGAATTGATGGAAAAGTGGAGGAGAAGCTTGAGCGAGAGATTCACAG	chr4R	742173821					0.030756877	0.15848446
GYD	100026608|F|0--22:T>C	TGCAGGGATTTCTCTTTTCTGATTGGGCAGTGCTGGGCGCCGGCGCGCCGGCCCAAATTTGGGCCGAGA	chr4R	744779745					0.032618401	0.116896462
GYD	100001842|F|0--27:C>A	TGCAGACACGATCAATCATGGCCATATCTCCCTGCCCTGCAAACGTATCTCTGCCCACTGTACGGATGC	chr4R	754157462			0.0372009	0.0527234
GYD	3362362|F|0--28:C>T	TGCAGACACGATCAATCATGGCCATATCCCCCTGCCCTGCAAACGTATCTCTGCCCACTGTACGGATGC	chr4R	754157462					0.047207973	0.037828405
GYD	5222219|F|0--9:G>T	TGCAGCGTCGGGGTCTCTGGGACGGGGCAGGGATGGCGGATCCGAGGAGAGCTGGCTGGAGGCGTTGTC	chr4R	759717709	SECCE4Rv1G0271160.1	WW domain-containing protein			0.027847832	0.099212865
GYD	100055281|F|0--19:G>C	TGCAGCCACATAATGGTAAGAAGATGCGTATCCATTGCGGCAGCGCTGCTGCTGCTGCTAATCTCGGCA	chr4R	759855270			0.0408317	0.0394519	0.025966178	0.038040137
GYD	100055281|F|0--60:A>G	TGCAGCCACATAATGGTAAGAAGATGCGTATCCATTGCGGCAGCGCTGCTGCTGCTGCTAATCTCGGCA	chr4R	759855270			0.0399807	0.0367457
GYD	5205737|F|0--5:C>G	TGCAGCGCGTGCTTCCTGGCACGGAGCTCCGTGAAGAACGAGACGGCATGGAGGCGCATGCTGCGGGTC	chr4R	761347816	SECCE4Rv1G0271490.1	DNA replication licensing factor mcm2			0.044120363	0.080613401
GYD	100004939|F|0--6:C>T	TGCAGACCAAGCATGTCCAGGTTGATTGTGTGCCCGTGTTGGGTCGGCATGCCCATCAGGCTACTGGCA	chr4R	761378155					0.033684151	0.035339931
GYD	100084156|F|0--53:T>G	TGCAGCGAGACGGCCGTGACGCGGCCCTCGCGGTCGCAGGCGACGCCGACGAATGCGCCGCCGCAGGGG	chr4R	763508125	SECCE4Rv1G0271690.1	Receptor-like protein kinase			0.049481227	0.049815696
GYD	100085624|F|0--26:G>C	TGCAGGTAGCTGAATCCCGTAGCAGGGGCTCATGGGGCAGACAAGCGTAATGGATGACCCCCACAGTAT	chr4R	770673312					0.035941133	0.070898873
GYD	100030967|F|0--56:C>A	TGCAGGACTTTGCACAACTCGCATAGTTCTTCAATGCTCCTCTTGGGGTTGGCATACAAAGCATGAACA	chr4R	770722891	SECCE4Rv1G0272580.1	Disease resistance protein RPM1			0.019573607	0.204406181
GYD	100083380|F|0--8:A>G	TGCAGAAGAGTTTCAGCTAGCTAATTATTCAACTTTTGTTGGCTTGGCAGCCCGCAATATTCTAGTGAT	chr4R	771717639			0.0254399	0.0483438
GYD	100003956|F|0--49:C>T	TGCAGCAGCTTTGCAGAGTGATTGATCTCCAAGACCAAAGATGATAGCGCGCCAATCATCACGGCGGCC	chr4R	773239260			0.0393912	0.0663665
GYD	100191000|F|0--41:T>G	TGCAGCAGCTTTGCAGAGTGATTGATCTCCAAGACCAAAGATGATAGCGCGCCAATCATCACGGCGGCC	chr4R	773239260					0.01502671	0.206361881
GYD	100126830|F|0--25:A>C	TGCAGGGGGTGGTGCAGGGCCGCGGAGGGCTCGTCCTCGGCTCCCTCATCCCCTGCGCGCTCTTCTACT	chr4R	774466227	SECCE4Rv1G0273160.1	1-aminocyclopropane-1-carboxylate synthase			0.04890562	0.034413095
GYD	100117311|F|0--53:C>T	TGCAGTCCACGAAAACATCACCTGTGGGGAAATCCAGCTCGATGAACGGCTTCCCCTCCTCCGCCTCCG	chr4R	779905280	SECCE4Rv1G0273780.1	Phenazine biosynthesis PhzC/PhzF family protein			0.034972003	0.02246839
GYD	100016091|F|0--10:C>T	TGCAGTTTCTCCTTAGCCATTGTCAACCCAGTCGAGATCCATGGCACAATCTGAAGTTGCCCGCTGCCT	chr4R	780414137					0.022784588	0.213670984
GYD	4489743|F|0--44:C>T	TGCAGAGGCATGGGAGGACGTCCTGGTCGCCGCGCAAGACTGTACCGAGGGTAAGAGCATCTCCAGCTG	chr4R	783626700					0.0362631	0.053315606
GYD	3362406|F|0--5:C>G	TGCAGCACAAGCTAGAGCTGATTGTGGTGCACAAACATAGCTTTTCAGGAAATCACATGTTGCTGGCAT	chr4R	784820369					0.048924551	0.049546957
GYD	3344342|F|0--18:A>G	TGCAGGCAGGCAACTGGCACCGTACCGCTGCCAAGCAGTTGGAGTTAGCCAATACTCTGAATCAACAGA	chr4R	798018196					0.044120363	0.045187069
GYD	3909322|F|0--10:G>C	TGCAGCTGAAGTTGTCCACCAGCAGTGAACGACGGATGAGGGATGCCGCCGGCATCTGCTGCTACCTCC	chr4R	799101526					0.047583099	0.041079594
GYD	100041705|F|0--52:A>G	TGCAGATTATCCCAGGCAAGAACGTAAATTTCGCCGCCCTATCATCCGTTCCACCTCTGGGCTCTGGCT	chr4R	802053544			0.0456338	0.063332
GYD	100080500|F|0--41:A>G	TGCAGGGAGCAGTTGTAGAGGAGACGTCGTCGGCAGCGACGATGACCGGAACGAGCAAGGAGTCCATCT	chr4R	802649469					0.047640339	0.050814567
GYD	3353337|F|0--20:A>G	TGCAGACTGAATATTGCACAAGCTGGCTTTAACACTCAAAGGGTTCGGAGCCTCTTCAGATGCAATCGG	chr4R	808698500					0.039361755	0.071631263
GYD	100009465|F|0--56:A>C	TGCAGATGACATGGTGATGAGTGTAGCCTGGAAGGCCACCATGAGCAGCTGCACGCATGTCAGCTTCAC	chr4R	808746513	SECCE4Rv1G0278470.1	Peroxidase			0.028760432	0.030838563
GYD	3583415|F|0--13:C>T	TGCAGGCGTGGGCCGCGGCCTGCCGCGGCGATGATGCTGCCGCCGTGGCTAACGTGACGTTTGACCGCG	chr4R	810011199	SECCE4Rv1G0278670.1	Anthocyanin 5-aromatic acyltransferase			0.02456655	0.066677331
GYD	3741595|F|0--36:G>C	TGCAGCATGTCCCCGTCATGGGCGAGTCTCCCACGTGTGCTTGCGCCTCTCTCTCGGCTGGGTGCCCCT	chr4R	828213323					0.047359265	0.042886106
GYD	100069875|F|0--60:T>G	TGCAGGAGACTTTGACCACTTCCGCGTGGTCTTGATAGGCAACGGCGACGAAGGACGAGCTGTCGCTAG	chr4R	849908154					0.049730133	0.034379463
GYD	100180584|F|0--27:A>G	TGCAGCATTTCGTCGAACAGGAGGCGGACGTGGTCGATGGAGCCACCAGCCGCGCGCATGAGGATGTTG	chr4R	855556497	SECCE4Rv1G0287540.1	Pentatricopeptide repeat-containing protein, putative			0.046831013	0.035792526
GYD	5221725|F|0--66:T>G	TGCAGCGAGTTGTTCGATATGTCGAGGTAGAAGAGGCGGTCCAGCTCGCCGAGCAGCGGCGGGATCTGG	chr4R	858980923	SECCE4Rv1G0288200.1	Receptor kinase			0.035955733	0.048776076
GYD	100104330|F|0--54:G>A	TGCAGAAAAGGAATTCCAGAGGATCCATTGAGCATAACTCGGGAAGAATCCGTCGAAAGCAGGATGCTA	chr4R	865450059					0.049322628	0.077720049
GYD	3597064|F|0--40:C>T	TGCAGTATATGGAAGTAAAATAAACAATTTCATGAGTTTCCTTTGAACATATTGAAAAATGCTATCCAC	chr4R	866413396					0.036907805	0.116829097
GYD	5047363|F|0--58:C>G	TGCAGGGCGACGCCGACGGCGGCGGGGCGCTCGTCGCCGGCAGGTCGGACGGCGTGCTCAAGATGTTCA	chr4R	866628554	SECCE4Rv1G0289590.1	WD repeat-containing protein RUP2			0.049303633	0.050616881
GYD	3349789|F|0--13:C>A	TGCAGACACAAAGCAGTTGATGCTTGTGAAGTGAACCTCTCTTAGTTGGTATCTTAATTCAGCTCGCCA	chr4R	867430807					0.04910153	0.094722487
GYD	100147428|F|0--9:C>T	TGCAGCCGCCGCCCCAGCCGAGGACCTCAAGAGCTTTGATGCCGAGTTCGTCAAGGTCGACGAGGCCAC	chr4R	868725884	SECCE4Rv1G0289880.1	SKP1-like protein			0.03135653	0.1243948
GYD	3746583|F|0--48:T>C	TGCAGCGGGCGGTTGGTGTCCATCCTCCAGATTGAGCCCCAGGAGCGGTGCATTGGCTCCCAGTGCCCG	chr4R	875008921					0.044331973	0.065137398
GYD	100124908|F|0--23:A>G	TGCAGCCGTAAGATCATCGGCGCACGGTTCTATAGCGCAGGAGTTCCTGACCAGTTCCTCAAGACGGAC	chr4R	877089983	SECCE4Rv1G0291610.1	Subtilisin-like protease			0.041722713	0.078435438
GYD	100018170|F|0--53:C>T	TGCAGTGCACTCATGAGTCATGAGTTCGTGAGCATGCTTCTTTTTTTTCCTTTCGAAAACATGTCATGT	chr4R	877090180					0.049322628	0.1015362
GYD	3743700|F|0--21:A>G	TGCAGAGTTGACGGAGGCTCCAATTTGAGACAGATTCACATGTGGCTTGGCGGCCTCTATCTCACCACC	chr4R	878887974					0.039645133	0.063805358
GYD	3743930|F|0--44:C>T	TGCAGTCACCGATGCTGCGGGCATGGAGGCTGCCACTGCTGCGCCGGCCCCGACGAGGTCCCGGAGCCC	chr4R	879000806	SECCE4Rv1G0291840.1	Glycine-rich protein			0.033453564	0.124870673
GYD	3744938|F|0--29:G>A	TGCAGCGCATCTGCGGGCACAAGATGTCTGCGCCTAGACTCAAGACCATCAAGATCAGGGGCTGCTGGA	chr4R	884133045	SECCE4Rv1G0292900.1	NBS-LRR resistance-like protein			0.04674739	0.093396892
GYD	3592272|F|0--28:C>T	TGCAGCGTGAGTTGCGCTTGTGGCACAACAACAACCGACTTAACAATCATGGGTCAACAACAATGCTTT	chr4R	884281792	SECCE4Rv1G0292990.1	NBS-LRR resistance-like protein			0.036907805	0.079333722
GYD	3581525|F|0--36:T>C	TGCAGCGACCCGTACCTGCACACCGCCTTGCTCAGCTGGACTCTCCAGGACGCCATCCACGGTTTTTAC	chr4R	891432459	SECCE4Rv1G0294510.1	Dihydrolipoamide acetyltransferase component of pyruvate dehydrogenase complex			0.035144443	0.063918014
GYD	3360664|F|0--40:A>T	TGCAGTATATGTCGATGAGACGATGACAAGGAAACAAGCGAACTACCTGCCCAGCCAGTGGAGATATTC	chr4R	894878696					0.011879087	0.265181128
GYD	100038487|F|0--67:G>A	TGCAGCTCCCGACGTCAGGAATCGAGGGCGTAACCGCCCTCCCTTAGTACTTAGCATTGACCAAGGCGG	chr4R	895300651					0.027677953	0.042938988
GYD	100027889|F|0--36:T>A	TGCAGGGCTTCCTAGCAGTTGCATGATGCTCGCGGCTGATCCTCTCTGCCTGCTCAATGTAAACGCTTC	chr4R	895654594			0.0372009	0.0323485	0.038879974	0.030584338
GYD	3357872|F|0--46:T>A	TGCAGAAGGAGGACAGAAGGTGAGGGGAAAGAAATCAAACCTGGGATTTCAGGAGACTTGGAGTGAAGC	chr4R	897223233					0.023581597	0.132309148
GYD	100019121|F|0--31:C>T	TGCAGCACACGCACGGCCAGCCTCATGTCTGCATATCCAAAGAACACATTAGAACAGTAGGAACAAATG	chr4R	897485573			0.0167707	0.11235
GYD	100076208|F|0--38:A>T	TGCAGACGACACCACAATGCACAGGGAGACCACCATCGACAGTTTCCCCCTCGCGTCGCGTGATGGCCT	chr4R	898726409	SECCE4Rv1G0295490.1	DNA helicase			0.022054921	0.036149463
GYD	3748237|F|0--16:T>A	TGCAGGGGCAGAGAGGTGCTCCGAGTTGATCCTTGTGGTCAGCGAGCCCCTGCACAAAAAAAGGTTTTG	chr4R	903062867					0.04230752	0.07540186
GYD	100014485|F|0--25:T>A	TGCAGTTTCCCAAAATAAATATTTCTATTATTCACAGCCAATAAATGCTTCTGTCACAAAAGACTAGGT	chr4R	903456844					0.046932825	0.072845014
GYD	100059111|F|0--51:T>C	TGCAGCTGAGTTGGAGCGCACATAACCATGGGCATCAAGCAAGGAGTATAATAGTACTTCAGCGAGTAC	chr5R	2554140			0.0421411	0.041953
GYD	100044088|F|0--62:G>A	TGCAGGTGCCAACCAAAAGCGAGACTATGGTGACACCGGCCGGCAAGTCTAACCGTCGCCCAGTCAAGA	chr5R	3132106			0.0338844	0.0232975
GYD	100028030|F|0--23:A>G	TGCAGAAACCTCTCAGGCCAGAAATCCTCTGGCCTCTCCCAAGACGACGGATCCCTCCCAAGGGCCCAG	chr5R	11339003	SECCE5Rv1G0298510.1	Cytochrome P450	0.0408239	0.0217391
GYD	100046570|F|0--47:T>C	TGCAGTGATTCGGATCTCAATGGCTAGGTACCTGAAGGACTCGAGCATTATCTCATCTGTGTCGCTGAG	chr5R	12491461					0.025213359	0.126540676
GYD	100036062|F|0--17:C>T	TGCAGCAGATCGTTTTGCGACGAGAACATCATCGTCGGCATACGGAATTTGGGCGATGACGACGAAGAA	chr5R	16279244	SECCE5Rv1G0299380.1	YABBY transcription factor	0.0440507	0.0696785
GYD	3355824|F|0--30:C>T	TGCAGTTTTTACAATGCAGAACATGCAAGACAGAAAAAACAAAACTTCCCATCGTCACGAGTAGCCGAG	chr5R	19241961					0.047583099	0.096653918
GYD	100041242|F|0--61:A>G	TGCAGCTCTGCGTCGGCCGCCGCTGCCTCGTCTTCCAGCTCCTCCACGCCGACTACTTCCCACAGGCGC	chr5R	20778164	SECCE5Rv1G0299930.1	Werner Syndrome-like exonuclease	0.0382503	0.0324452
GYD	3357091|F|0--60:A>G	TGCAGGTAGTATTGATCAATTCTGGCTTGTCTACCTGCACGTCTAGGCAGAAAGCCCCCGATAGGCAGC	chr5R	26128441					0.021697858	0.096879435
GYD	100050639|F|0--55:C>T	TGCAGTATCCTGCTCAGCGCCATCTTGGCTTCGACCAGCGCGAAGTTCTGGCCGACGCAGACCCGCGGG	chr5R	27762212	SECCE5Rv1G0300700.1	Cytochrome P450-like	0.0321704	0.0412769
GYD	5044609|F|0--12:A>G	TGCAGGTATATTACCACATCGAACTGATTTACAGGCCTTGTGGTTGTCATTCCTATGGCTGTGTTGTTC	chr5R	30677360					0.041827315	0.077977177
GYD	100051080|F|0--15:T>C	TGCAGCGGCAGGCAGTGATGGATGAAAGTGAGTACCACGCTGCTAGCGCTTTGCATGAGTCATGGGTCT	chr5R	31996220			0.0382503	0.0571207
GYD	100051080|F|0--66:T>C	TGCAGCGGCAGGCAGTGATGGATGAAAGTGAGTACCACGCTGCTAGCGCTTTGCATGAGTCATGGGTCT	chr5R	31996220			0.0488898	0.0437151
GYD	3585613|F|0--18:C>T	TGCAGCTTTTATTTGCAGCTGTAGCTCTCCGCTTTTGGCACGAGGCCGTTGCCTCCAGGGACTCGGTCT	chr5R	39707215					0.047486813	0.114743248
GYD	100023805|F|0--53:T>G	TGCAGTTCATACTCGTGCTGCCTTCGCGATTTCAGCCACTCCGACTTGAGAAATGTCATGAGTTCTTCA	chr5R	41750332	SECCE5Rv1G0302730.1	WPP domain-associated protein	0.0320741	0.0780461
GYD	100053542|F|0--20:C>A	TGCAGGTACACATGAACTTCCGATTTCTTCTCGTTTCTCGGCGAAGAAAATCACAGCCTTACTACCACT	chr5R	42257355					0.046134192	0.120079555
GYD	3741565|F|0--63:A>T	TGCAGTAAAAATAAGGACATCATTTTGCGCAGCGGCATCAAAGAAAAGAATAGGAAACTGAGAAGATGT	chr5R	42633974					0.034844259	0.068237778
GYD	100003938|F|0--63:T>C	TGCAGATCCGATGGCCTTGAGCAGTTTAGCTTCAGCGTCACCAACAGGAGCGGCAATGATGGATGGCTG	chr5R	45203749					0.041722713	0.124002367
GYD	3748450|F|0--31:A>C	TGCAGCTACAGAGGCCGCTGAAAATTATCCGATCGGGGCGTCGATCATCGATCGACTATCCTCGGCCGC	chr5R	75551152					0.037615243	0.087832094
GYD	3734910|F|0--17:C>G	TGCAGGTTCAACGCCGCCCTGCCATTAGCAAGCAGGAAGCCGCCAGATCCGCCGCCATTCAAGACACCG	chr5R	96960151					0.041449809	0.071972817
GYD	4095086|F|0--22:T>C	TGCAGAAGATGATGGCATGGACTGGCCCCTTCACTGAAGAGGACGGTAGGACAGGATGGTCGCGATCTC	chr5R	107525083					0.047486813	0.091816766
GYD	100110478|F|0--17:A>T	TGCAGTTTATTATGTGCAAGTGATGATCTTGCTGCAAGTTTCTTCTTGGGTTGACAGGTTGATGATTCT	chr5R	133270592					0.042787218	0.075696663
GYD	100081607|F|0--51:T>C	TGCAGCTCTCCTCTCTCGCACGCGCGCCCGTGCCAGGAGCGCCCCGTGCTCTGATGGGATCGCCGAGAT	chr5R	142635498			0.0445123	0.0219812
GYD	100018452|F|0--18:A>G	TGCAGAGGGTGATAATCAAACATTGGTTCACGCCGTGTTTCTGGGATGGGATTTGGTGAACGGAACCCG	chr5R	147870139			0.0371677	0.0328011
GYD	100038242|F|0--24:G>T	TGCAGGTTTGCATCTTCGAGGTTTGATTATTAGAATAAAAATTGGTTCTGGTGCAGCTAAGAAGATGTT	chr5R	369786529			0.0440507	0.0358428
GYD	3744688|F|0--15:G>A	TGCAGGTTGCTGGTGGTGCCGTTGATGGCCAGCCCCAGCCCAACCATGCTCCCTGCGTGCATGCTCACA	chr5R	379522134					0.04890562	0.051542011
GYD	3364769|F|0--65:C>T	TGCAGGCTCTGGCTGCATGGTGCTGCTGATGGACTGCACCTGCGTCTTGCCGCTGGGGCCCTTGGCGCG	chr5R	381066576	SECCE5Rv1G0320070.1	2-oxoglutarate (2OG) and Fe(II)-dependent oxygenase superfamily protein			0.041827315	0.062266098
GYD	100043484|F|0--17:C>T	TGCAGTTCCCGGACCGCCGCGATGGCGTCCTGCTCCCGCATGAAGCTCACAAAGGCGAAGGTCCGTCCA	chr5R	431367441	SECCE5Rv1G0323220.1	RNA binding protein, putative	0.033587	0.0407106
GYD	100044967|F|0--20:C>T	TGCAGCACATATCCTTGAACCTCTATATAAACCGAGATTTGCACCACCACATCCCATCACACATCATCT	chr5R	433031553			0.047129	0.035949
GYD	100083222|F|0--67:T>G	TGCAGCACCTCGACCTCTCCCAGAACGACCTGGTGGGCCCTCTGCCCGCCTGCCTCGCCGCCCTCCCTG	chr5R	440480408	SECCE5Rv1G0323860.1	Receptor kinase	0.0408239	0.0370568	0.046569902	0.024326221
GYD	3362686|F|0--45:A>G	TGCAGAGGCCTGCAAGCACCACCAATGCAAGCAAAGACACGGTATACAGTACTGGTGTACACGGTTTCA	chr5R	440655327					0.043414703	0.046292244
GYD	3740892|F|0--36:A>G	TGCAGCTCCTTGGTGGAGATCATGCGGACGTCGGCGACGTCCTTGTTGGCGGCCGGCATTGCGTCGGCG	chr5R	443732966	SECCE5Rv1G0324140.1	Desaturase			0.046329564	0.047494592
GYD	100025633|F|0--7:C>G	TGCAGTACAATGAGAAAGAGGATCATGGGCTCAGAGATTATGCCACACGCTGTAAGAATCACTGCAATG	chr5R	449296256			0.0386697	0.058331
GYD	100019884|F|0--52:G>A	TGCAGCTGCCCGCGCCGAAGAAGAGCAACTGCTCCATGGTGTTCACCCTCAAGGAGATGGAGGAGGCCA	chr5R	466781803	SECCE5Rv1G0325550.1	Protein kinase	0.0426959	0.0169087
GYD	100031693|F|0--47:A>C	TGCAGCTTATATATACACAGCAAATGACACCATATATACATATGCCAATAGCAGGGTCGAGGTCCAGAA	chr5R	467022970			0.0421411	0.0445184
GYD	100030879|F|0--22:A>C	TGCAGGGATCCCATCAAGTGCAACAAATGCAACCTCCAGGGGCATAAAGCTAGGGACTGCTCCACCCAG	chr5R	471531446					0.043414703	0.031378746
GYD	100036416|F|0--47:A>C	TGCAGATCTCGGGCTGGTTATGACCAAAGAGGAGGGCAAGCAACACGACCAAGCGGCCCATTCTGCTAG	chr5R	478361010			0.049577	0.0257999
GYD	5222278|F|0--52:A>G	TGCAGCGGCTCGTCCTCTCGAACAACCGTTTCACTGGCGGCGTGTCGCTGGAATTCAACAAGCTCCGCC	chr5R	484588108	SECCE5Rv1G0326710.1	Receptor kinase			0.028899267	0.101205544
GYD	3602982|F|0--37:T>G	TGCAGGCCTCCGACAGGATCTGGGTGTTGAGCGTCACTCCAGGGTTCGGGTGCCAGTGCATCAGCCTGC	chr5R	489030157					0.044841481	0.036989891
GYD	100053160|F|0--64:A>G	TGCAGACCTGGGCACGAACAGAGGGCTGTCGTACATCGACATGAGCGACAACCTTCTTGAAGGGAGGAT	chr5R	494380228	SECCE5Rv1G0327640.1	Receptor-like protein kinase			0.014372832	0.080038719
GYD	100050415|F|0--64:C>G	TGCAGTGCCCCATCGCGACGCACGCGCGCCATGTTCGCTCGCTCATCCATCGTGGAACGTGGATCCGCA	chr5R	498695902					0.044287859	0.041390212
GYD	5207097|F|0--23:G>A	TGCAGTCATATCTGGCCCGCCCCGCCTGCCCGAGCAACGCCAGTGACACCGGCCTCACGGGGCGGCACG	chr5R	501585644	SECCE5Rv1G0328310.1	Hexosyltransferase			0.048712385	0.058432933
GYD	100079071|F|0--20:G>C	TGCAGTCACTAACCTGATCGGGAGGAACAGTAACCGTTAGGTGTGTCACGTGGAGTATATAATTTCCTT	chr5R	503449455			0.0440507	0.0318883
GYD	100076726|F|0--64:G>C	TGCAGTCGCCCAAGTTCAAGGAGATGATCGAGCGGACGTCGGCCGCCGAGAGCAGCACCACCACGTCGT	chr5R	511466977	SECCE5Rv1G0328990.1	Ap2-like ethylene-responsive transcription factor			0.035758276	0.096275967
GYD	5208591|F|0--64:C>G	TGCAGTCGCCCAAGTTCAAGGAGATGATCGAGCGGACGTCGGCCGCCGAGAGCAGCACCACCACCTCGT	chr5R	511466977	SECCE5Rv1G0328990.1	Ap2-like ethylene-responsive transcription factor			0.035144443	0.051331441
GYD	100023355|F|0--12:C>A	TGCAGGAGATATCCTTGACTGGAGGAGATGGTAGAAACCTTGAGGAAATAGGATGATGCCGTGTGAACA	chr5R	512129705					0.039369978	0.033899577
GYD	100043294|F|0--46:C>A	TGCAGATTAGCACGTTCGCCAGTCTCTTCTTCATCTCCCTCTTCATCTCCATCTTCGCGACGGGCATCC	chr5R	512843613	SECCE5Rv1G0329150.1	Cellulose synthase			0.044841481	0.032718046
GYD	100001975|F|0--32:C>A	TGCAGTTCATCCATCCTTGGGTCTCAGTTGAGCTGCATCCAACAACAATTTGAACTGTTCTTGCATCTT	chr5R	515398158			0.0321704	0.0427262
GYD	100006067|F|0--10:G>C	TGCAGGATCTGGGCCTCCAGTTCACCCCTGTCAACGACTCTCTCTACGAGACGGTGAGGAGCCTCCAGG	chr5R	516321899	SECCE5Rv1G0329470.1	Cinnamoyl-CoA reductase			0.047637889	0.015565016
GYD	3595964|F|0--23:G>C	TGCAGCACCATCTGCTTCGCGGAGGCGGCGGCGCCGCCAGGGCCGCCGCTAATCTGGTGCTGCCGAGAT	chr5R	518261124	SECCE5Rv1G0329550.1	Basic helix-loop-helix transcription factor			0.045439673	0.086148134
GYD	100073242|F|0--28:G>A	TGCAGGGGAAGGGCCTCTGCCTCATGCCGGTCTCCCTCGCCTCCGCCATCTCCTCCGCCACGTGCCAGC	chr5R	518263477	SECCE5Rv1G0329550.1	Basic helix-loop-helix transcription factor			0.01358027	0.08355741
GYD	100046592|F|0--28:C>T	TGCAGGAGAGGAGAGGGACTAGGAGAATCCACGGAGCAGGAGATTTGCAGTGATCCAAACGTGTGATCC	chr5R	519427817					0.028113358	0.209418282
GYD	100031803|F|0--16:C>T	TGCAGACCTGGGGCTTCTTCCTGGTGAGCGAACGTCTGCAACTGCATGCGTGCACCTCGATTAGCTCGT	chr5R	519505940					0.022532037	0.030892558
GYD	100105739|F|0--21:C>G	TGCAGCGGCCCGCCTCTTCGTCCACCTCCGCCGCAGCGGCGTACCCCCTGACGCGCACACGCTCCCGCA	chr5R	522524676	SECCE5Rv1G0329900.1	Pentatricopeptide repeat-containing protein			0.040399652	0.02464217
GYD	3346935|F|0--66:A>G	TGCAGAATTCTATGGATCTTCCTCGAAATATCACTGGGAATACTGGTGATCTTCAAGAACCTGTGGATC	chr5R	526702849	SECCE5Rv1G0330220.1	Kinase-like			0.047486813	0.034777703
GYD	3362829|F|0--48:C>T	TGCAGATCATTTATCCGCTTCCCGATTGCCAGAGGAGGCCAAGGCAAACGATCGGCGAGCCCATCCGCC	chr5R	527432835					0.046265509	0.043389982
GYD	3600749|F|0--19:C>T	TGCAGTCGTACCAGCAGTCCCTCCACGCGCTCCAGTCCATACCGCTCTGCGTCCTCGTGCCGCACCTCT	chr5R	528874663	SECCE5Rv1G0330420.1	PHD finger protein			0.044841481	0.060444035
GYD	3593069|F|0--38:G>A	TGCAGCAACAGTAGTTCGATAGATAGGAGACTGGCGATGCGCTTCAGAGGTAAGTTTATTTTGACTCCC	chr5R	532484093					0.035121829	0.071137652
GYD	100011963|F|0--19:C>G	TGCAGAGCGCCATCCAGGCCGCCATCGCGCACTGCAAGAACTCCATCGCCGTGGCCAAGCAGTAGTGCG	chr5R	537479957	SECCE5Rv1G0331270.1	Bri1 kinase inhibitor 1	0.0452276	0.0445927
GYD	5214299|F|0--50:G>T	TGCAGGCTCGGTTTTTACTGGCAAAGCTAAATCCATCGGTGGCATATAACGCCGACAACCCTGCTCCCG	chr5R	538319258	SECCE5Rv1G0331360.1	Protein transport protein SEC23			0.034972003	0.058504144
GYD	100025965|F|0--33:G>A	TGCAGTACTCCTTGGCTTGTCAAAAATGTTCACGCCCACATGGGCATGTTTAATGCTTTAATCGACTGC	chr5R	539108023			0.047308	0.0149452
GYD	100053352|F|0--48:C>G	TGCAGCAGACCTGCATGGGCACCACGCTATGGCGAACGAAGCCGCTGCCCACGTGGAAATCAATGAGCC	chr5R	539113487			0.0407668	0.0545368
GYD	3739909|F|0--34:G>A	TGCAGACTACGATCTCAGTGGAGACGAGAGAACCGCCGATGACGCATACGTCTTTCTGGTGAAATGGCT	chr5R	540822267	SECCE5Rv1G0331710.1	Carboxypeptidase			0.039361755	0.056992384
GYD	5211671|F|0--63:G>A	TGCAGCTCCACGCCAATGCCTCTCAGGAGGCCCAGCTGAGAGAGTTCATCTCGTCCAGGAGGAGCAGCG	chr5R	540822974	SECCE5Rv1G0331710.1	Carboxypeptidase			0.041794981	0.056581593
GYD	100014878|F|0--26:C>T	TGCAGAGGCATGTGTGCAGGGGCATACGCCAGGGATTGAACGCGACGCTGTAGCCTGTAGGGGAGGTGG	chr5R	545106179					0.034227875	0.083435757
GYD	3579634|F|0--5:C>A	TGCAGCGGCAGCAGCGGAAAAAGGCGGGCCGCTTCGATTGGTCGGGGATCAGAAAGGCAGGCCAGGCCG	chr5R	545999207					0.04910153	0.03878261
GYD	3362763|F|0--31:T>C	TGCAGAGGAGCTTCGACCACTTCGCCTACTTTGCACTGGTGCTCTTCATGACCATGATGCTGGTGGAGG	chr5R	547021970	SECCE5Rv1G0332330.1	ABC transporter G family member			0.030993359	0.086584497
GYD	100013603|F|0--35:A>G	TGCAGACTCCTCTGGTATTCTCCTGAGTAGTAGTCATCGCTTCTCCATGGTGGCACAACTGGAGGCCTC	chr5R	554359180	SECCE5Rv1G0333070.1	DUF2431 domain protein	0.0473866	0.0480484
GYD	3737929|F|0--35:G>A	TGCAGACTCCTCTGGTATTCTCCTGAGTAGTAGTCGTCGCTTCTCCATGGTGGCACAACTGGAGGCCTC	chr5R	554359180	SECCE5Rv1G0333070.1	DUF2431 domain protein			0.028899267	0.146500646
GYD	100064350|F|0--67:T>G	TGCAGCCTCTCCAGCACGTTCTCCGTGTTCACGTCCCTCCTAAGGCTCTCCTCGCATGCCTTCTTGATG	chr5R	554576526					0.047486813	0.025043891
GYD	3363395|F|0--64:G>A	TGCAGCATCATGCACCATTCACGACTGGATCAGTGCCGATCTTGGCAAGAGTTGTTGCGAGCAAGGATC	chr5R	555518547					0.047120123	0.037666272
GYD	5211378|F|0--34:C>G	TGCAGTGGCACATCGTCCTGCTCCTCGGCGCCGGCTTCGCCATCGCCGACGGGTTCAAGGCGAGCGGCC	chr5R	561893665	SECCE5Rv1G0333810.1	Tonoplast dicarboxylate transporter			0.04910153	0.038383317
GYD	100018536|F|0--31:C>T	TGCAGCTGATCAATCGATTGGTTAACCCAGACACCCCGGTGGTGTCAGTCACGACTCACGAGTGTATAT	chr5R	568283802					0.047777123	0.073046791
GYD	100113709|F|0--32:A>G	TGCAGCGCCGCCGCCGGAGTTGGGGTCGCCGAAGGGGAGTCGCTGTTGCTGGGCGGCTGGGAGAAGACG	chr5R	579496534					0.048036023	0.087722734
GYD	100025597|F|0--16:G>T	TGCAGAACTCCAACGCGCTCAACAACAAGACCGAGACGCACCCGTGGCATCTCCATGGTCACGACTTCT	chr5R	590703416	SECCE5Rv1G0337300.1	Ascorbate oxidase	0.0270066	0.0284917
GYD	100180230|F|0--52:C>T	TGCAGCTCCGCCAGCATCGGCAGCGTGTTCACCGTCAGCATGGCCACCGCCGCGTGGGTGCCCTCCGAG	chr5R	591893269	SECCE5Rv1G0337540.1	Bidirectional sugar transporter SWEET			0.04890562	0.032648367
GYD	100073165|F|0--59:G>A	TGCAGTTCGGTGTGCTGGGCTGTCCAGTTCAGCTCGCGGTTGATCCTTGCGGGGTTGCTGTACACTTCC	chr5R	594012435	SECCE5Rv1G0337730.1	UDP-glucose 4-epimerase, putative	0.0392917	0.0310358
GYD	3730174|F|0--18:C>T	TGCAGGTAGCTGAGCCGCCGCATCTCGAAAGGTATCTTCAAGCAAGTTATCTTGGAGCATCTCCTGAGT	chr5R	595523420	SECCE5Rv1G0337980.1	F-box protein			0.033819252	0.113557731
GYD	3740234|F|0--24:G>A	TGCAGGTCCTCACGGGGCTGCTTGGCCTCAACATCGTCGAGCAGGTGCAGGAAGCGATGAAGATGGACG	chr5R	596844724	SECCE5Rv1G0338130.1	Kinase family protein			0.035144443	0.118753318
GYD	100025772|F|0--47:C>T	TGCAGAAACAAATGCTTAATGGCCTTAGACTTTGTCATCCTTTTAGCCAGGATCAATCTGCTAATGGAA	chr5R	604029487			0.0454971	0.0256795
GYD	100042077|F|0--21:A>G	TGCAGTAGTCTAAGATGCACTATGAAGGTGAGGGAGCAGCCGCGCGCGCTTTTAATGCGTGACGCGCGT	chr5R	607219995			0.0454971	0.0288936
GYD	3591713|F|0--21:G>A	TGCAGTAGTCTAAGATGCACTGTGAAGGTGAGGGAGCAGCCGCGCGCGCTTTTAATGCGTGACGCGCGT	chr5R	607219995					0.041794981	0.050944697
GYD	3597548|F|0--52:G>A	TGCAGTCACATTTCAAGATCAACCATCCTGAACTGCCGCTGTCATACTACACGGGAGTTCTTGGTGAGT	chr5R	607220808	SECCE5Rv1G0339370.1	NADP-dependent alkenal double bond reductase			0.030875222	0.084151362
GYD	100042952|F|0--21:A>G	TGCAGTGTAGTCGAAAAGGAGAACAAACAATAAGGGCATCTTCAACGGGAGACGCTAACGGAGGACGCT	chr5R	610014162			0.0363657	0.0521768
GYD	100027891|F|0--62:T>C	TGCAGGCAAACACAAAGTTGACCCTACATAGAGCATCACACGGAATAATTTGACCAAGAAACTAACGAG	chr5R	611154288			0.0466572	0.0188019
GYD	100147470|F|0--28:G>A	TGCAGGTTCCGGTCGCCGTCGCCGTCGTGGCGCTCCAGAAGAAGCAGATTATTCTTCCAGCCGCGTGCC	chr5R	614396534	SECCE5Rv1G0340350.1	CRT-binding factor			0.017343136	0.087022243
GYD	4094030|F|0--64:C>T	TGCAGCTTCTGGAGCGCCACGACGGCGACGGCGACCGGAACCTGCCTCTGCTGGAGCGCCACGACGGCC	chr5R	614396537	SECCE5Rv1G0340350.1	CRT-binding factor			0.02657458	0.136129359
GYD	3579893|F|0--10:A>G	TGCAGGTTCCAGTCGCCGTCGCCGTCGTGGCGCTCCAGAAGAAGCAGATTATTCTTCCCGCCGCGTGCC	chr5R	614585211					0.017343136	0.155695754
GYD	4099822|F|0--38:C>T	TGCAGCTGGATATTTCCCCGCTCCGGCCTCCAGGGGGGCAAACTGCAATTGACCCACAAGATGTGGCCG	chr5R	615858487					0.047560365	0.053524671
GYD	3906824|F|0--46:T>C	TGCAGGGTCTGACATGGCAACAATTATGAAATGACGTATCAATTTCTTTGTAAAAATCACATTTTATCA	chr5R	619231523					0.044234458	0.042458034
GYD	3364553|F|0--11:G>A	TGCAGTCAGTTGGGCTGGGCTCATAACGTTCGTGGTGCGCGGAGACCATCGCCAAAGGCCGAGCCACAC	chr5R	620722487					0.035758276	0.054680641
GYD	100001266|F|0--9:T>C	TGCAGACTTTTGAGCTTTCTCCTTGGGGACTTCAGCCTGGTCACGGGAGAACGAAATCCATTCCGCATT	chr5R	620991966	SECCE5Rv1G0341130.1	GTPase-activating protein GYP7	0.0370045	0.0303396
GYD	3907216|F|0--47:A>C	TGCAGGACGCAGGCCGCGATGGCGTAGAGCAGCAGGTCGTCGGTCGGAGGAGCATGCAGCCTTATTTTC	chr5R	620992499	SECCE5Rv1G0341130.1	GTPase-activating protein GYP7			0.047171332	0.06788064
GYD	100015326|F|0--10:G>A	TGCAGATGCTGGCAATCCTCGATATCCTCCTAGAGGAGCTGAAGGGCAAGCTCTTGGCCGTCGGGATCG	chr5R	627592173	SECCE5Rv1G0341830.1	ATP-dependent Clp protease ATP-binding subunit			0.046425801	0.101534679
GYD	4491597|F|0--40:T>C	TGCAGCTTGCCGCCGAGGCCCCTGGCGAAGGCCTGGGCGATGAAGAAGCGCGCGAAGCGGTGGATGCGC	chr5R	633831710	SECCE5Rv1G0342810.1	1-phosphatidylinositol phosphodiesterase			0.023581597	0.070087092
GYD	3745707|F|0--19:C>T	TGCAGGACGGGGAAGAGCTCGGCGACCTCGTGCTGCGAGGACCTCGCCGTGGAGGAGGAGGAGCGGGTC	chr5R	640716146	SECCE5Rv1G0343740.1	ATP binding microtubule motor family protein			0.039705471	0.042515987
GYD	3342737|F|0--15:G>T	TGCAGGTTGTTGCACGGATCAGATATATGGAAATGTCATCATCCAAATAGAACAGTTCGATTTCAGAAT	chr5R	641236623					0.032120051	0.066950728
GYD	3901355|F|0--25:G>A	TGCAGTTCTGGTCATGCCGTCAAGTGAAGTGAAACATGAACCGTGGGCGAAGTCGACAAAAGAGGACGC	chr5R	641246423					0.0321909	0.093008655
GYD	3745853|F|0--67:T>G	TGCAGGTGCGACGAAGCTCTTTTTACCACATATGGTCTGTTTTCCGTTCTGCGCTTGCGACGATGATTT	chr5R	641524242					0.034900561	0.178259296
GYD	5210403|F|0--47:C>T	TGCAGTCCATACTACAACATTAGCATCATAGGAGCTATGGCCGGAGGCAAAACGTTCAGCACAAAATTC	chr5R	641596610	SECCE5Rv1G0343860.1	Eukaryotic aspartyl protease family protein			0.048924551	0.077495933
GYD	100128507|F|0--8:T>C	TGCAGCACTACGTATACACGCTGCTTCCCCTGTCCCGTATCCGCGTCACCACGTTAATTACTCCACCCG	chr5R	644195391					0.018937234	0.126386723
GYD	3358263|F|0--29:T>A	TGCAGCGTGATCTGCGCGCCCGTGATGTGTACCTGCGCGCCGCGCCCGTCGATCGTCTTGTTGCTGTTC	chr5R	645905052	SECCE5Rv1G0344540.1	Pectate lyase			0.02967748	0.097821065
GYD	100041960|F|0--23:C>G	TGCAGCTCCGCCGCGGAGATGTACCCGTCGCCGTTCTCGTCGAACACGGCGAAGGCCTCCCTCATCTCG	chr5R	657036899	SECCE5Rv1G0345540.1	Calcium binding protein			0.019851493	0.032581953
GYD	100016834|F|0--62:G>A	TGCAGGCGAGCGCTGATGTCGTCCATCTTCCTGGTGAAGTTGCTGAATTTGACAAGGAAGTCGTCCATC	chr5R	658133319	SECCE5Rv1G0345750.1	Alkyl hydroperoxide reductase subunit C			0.026256942	0.039070464
GYD	100147820|F|0--48:C>G	TGCAGAGCCCATGGCCTGTCAGCCCAGCGCCCATGCCCACGACGACCACCTGGCAGCCCGAGGCTGCGC	chr5R	669136279					0.033684151	0.084408123
GYD	100013329|F|0--11:C>T	TGCAGCAAGCACGTTACTGGAGTAGCCCACCATCAATCAGCCCAACAGAGCGGCCGAGCTGGCCTCGTC	chr5R	685578170			0.0382503	0.037568
GYD	3353777|F|0--22:T>A	TGCAGACATCCTCAGAGTGAATTAACAGCCTGATCTCTCGGCAGCGTCAGAGGGACGAGCAACTGGTAC	chr5R	691581988					0.040264172	0.101818568
GYD	3596564|F|0--31:C>A	TGCAGTTGTTGGAAATTCTCATCCAGCATGCCCTAGATGGATCCCATCATGAGAAGGCAAAGATAAACT	chr5R	694154903					0.03161988	0.097196936
GYD	3364788|F|0--14:C>G	TGCAGAAGCAACTCCGAGATGGTATGGGGTAAAGAGTGTGATAACTTCCATGCTGAGTAGGCGTCAGTT	chr5R	699396746					0.031813003	0.062194868
GYD	3364413|F|0--65:G>A	TGCAGGGTGCGGATGTAGCTCTCTAGGGTGCGGTCGTTCTCCAGCGGCTTCCTAGCAATGAAGAGGCGC	chr5R	706240192	SECCE5Rv1G0352010.1	Polyubiquitin-like protein			0.020713356	0.100378909
GYD	100033515|F|0--56:C>T	TGCAGGTGAGCTTGCTCTGCTTCCTGTTCCCCCCGTACGCGGGCTTAGATTTGGTTCGAATTCGAAGCG	chr5R	706477913					0.048921083	0.02889259
GYD	100081732|F|0--41:C>G	TGCAGTCCGGCGCGGGACGAGCGGGAGATGGGGGCCTTCTTCCCCTTGTCCTTCTCGGCGGTCTTGGCG	chr5R	706477916	SECCE5Rv1G0352060.1	Histone H2A			0.021697858	0.131620731
GYD	3591126|F|0--33:A>G	TGCAGAAGATGAAGATGGATGACGCTGACCCCAAAGACTACCTCACCTTCTTCTGCTTAGGTAACCGAG	chr5R	709963152	SECCE5Rv1G0352480.1	Phospholipase D			0.011838457	0.205228207
GYD	3908955|F|0--11:C>T	TGCAGGTATTCCTGCACGCCGTGCTGGCGAGGAAGCGGAAGATGCAGCTGCGGTTCCGGGACATGGAGT	chr5R	718790130	SECCE5Rv1G0353700.1	Cyclic nucleotide-gated channel			0.023612331	0.102905374
GYD	3602049|F|0--12:A>C	TGCAGCGTCGGCAGATACTGCCCTGACGGGATGCGCCTCGCCATCGAGGTCCATGACATGCCACGGACG	chr5R	719611939	SECCE5Rv1G0353770.1	Blue copper protein			0.049322628	0.060444528
GYD	3910081|F|0--44:T>A	TGCAGTAGCTTGTTCTTAGGTGAACCACGTAGTTTCTTTAATGGTGATCCAAAGGGGAGGCACTGCCTA	chr5R	721119524					0.049091678	0.035828985
GYD	100110147|F|0--35:T>G	TGCAGTGGCGGGAAGCAAAGTGAGAGAAGAAAGTGTAGCCTAATCTTCGGATATGAGGTTATGGAGGGT	chr5R	721209234					0.022784588	0.138150449
GYD	5200738|F|0--19:T>C	TGCAGTGCGTGACGCCGACTGTGTGCGCGCCCAACAGAACCACCATGTCGTCTGAGCTGAGACCGAGGT	chr5R	722917901	SECCE5Rv1G0354350.1	Peroxidase			0.044685142	0.084774525
GYD	100060843|F|0--62:A>G	TGCAGTATCGCCGTCACGTACTCGTCCACGACAGCGATTGCCAGGCGGAGCCGCCGCTCGCTACCGAGA	chr5R	723641175	SECCE5Rv1G0354460.1	Cytochrome P450	0.0287853	0.0434599
GYD	3737325|F|0--27:C>T	TGCAGAATCGACCACCACGAGATGTTTCCGAAACCCCAGAACATCACAGCGGCGGAAACCAATAAACCA	chr5R	726324549					0.042875138	0.052228991
GYD	100019933|F|0--65:A>G	TGCAGCTGTAAAACAGCGGGACGCGCTAGCTATAGCTCTTTATTTTGTTCTGCTGCTGTCGCCGCAAGG	chr5R	726568714			0.0215265	0.0783669
GYD	100064386|F|0--46:T>C	TGCAGATGTATAGGACGGTGAAGGGCACAGACAGATCGTCGCACATTGCCACAGGTACACACACATGCA	chr5R	726821129			0.0492557	0.0252346
GYD	100011091|F|0--30:G>A	TGCAGGGACAGCATTTTCTTTCTCCTTGACGCTTCACACTAACAGCCACCACAAAACGAAGGACGAAAC	chr5R	728526985			0.0333871	0.0594632	0.049303633	0.027939814
GYD	3577480|F|0--47:C>G	TGCAGGTTCCTGACGACGAGAGGGAGCCCATACCTGGGCAGCAGGGTCACGAAATTGCTGGGCTTGTGC	chr5R	731888523	SECCE5Rv1G0355500.1	Cytochrome P450			0.047637889	0.034775173
GYD	100075444|F|0--42:G>A	TGCAGAGAGCACCACAGCGGGAAGCTCGCCGGCGAGGCGGACGCAGCACGCGTGGAAGTTGGGCATGTC	chr5R	734875625	SECCE5Rv1G0355840.1	Alpha/beta-Hydrolases superfamily protein			0.032690436	0.091536207
GYD	3594058|F|0--7:G>C	TGCAGCTGCTCAGCGACGGCACGGTGATCCGCTTCACTGACGGCTACCCGCTCCCCATCCCGTCGCCGC	chr5R	734875917	SECCE5Rv1G0355840.1	Alpha/beta-Hydrolases superfamily protein			0.038878943	0.07682642
GYD	100061804|F|0--11:C>T	TGCAGTGAGTGCTCCGAACTTTCCTTTCGCCGCTAAACCATCCCCGTTTTGACTTTTGAGATTCCGCGG	chr5R	735425450			0.0167707	0.13801
GYD	100085133|F|0--44:G>A	TGCAGGCAAGTGTCGGCGGCGGTGGAGGAGGAATCGGTGGTGGCGTGGGAGGGGGAATCGGCGGCGGCG	chr5R	736674846	SECCE5Rv1G0356050.1	DNA topoisomerase			0.049108349	0.036188046
GYD	100080532|F|0--20:T>C	TGCAGGGATTGGGGGCACTCTCTCGCCCAGTGGCTGGTGTCCCCGCACTTGAAGCACGCGCCCTTGGTG	chr5R	736674849	SECCE5Rv1G0356050.1	DNA topoisomerase			0.019860178	0.121713174
GYD	100016917|F|0--9:T>A	TGCAGATTATAGACTTTGAGCCTGTGTATTGTGACATTGCGGGCGCCCCTAAACTTTGGTTCAATCATT	chr5R	743926619			0.049839	0.0327971
GYD	100133409|F|0--19:A>G	TGCAGCGAGGGGACGTGCAATCGGATTGGGGGTTTAGGGTTTAGGGAGGGGACTGGGCGGCTGAGCGCG	chr5R	744208940					0.044165858	0.064331054
GYD	100049488|F|0--20:T>C	TGCAGCGCCGTTGTGTGCAGTGGAGCGCTCGAGCTTGGCACGACCCCGCCGACCTCCTCCATGCAGTTC	chr5R	746090724			0.0399807	0.0633341
GYD	3903705|F|0--9:T>C	TGCAGCTAGTCCTATTGAGATTCGTGACATGGAACCTGATGTATTCGATTCATTGCTCCACTTCATATA	chr5R	756205966	SECCE5Rv1G0358580.1	BTB/POZ domain containing protein			0.04949208	0.059976276
GYD	3883862|F|0--13:G>C	TGCAGATGATGAAGACGCCGTCGCCGCTGTCGCAGATGACGCGGGCGCAGCCGATGGCCGTCGAGTCGC	chr5R	760823386	SECCE5Rv1G0359250.1	Pathogenesis-related protein 1			0.027482831	0.061896275
GYD	100077234|F|0--47:G>A	TGCAGCCATGCCACCTGCTCGGCGTACTTGTCCGGCGTCGCGTTGGGGTCGTTGGCGCACTCCACGTTG	chr5R	762358179	SECCE5Rv1G0359490.1	Endo-1,4-beta-xylanase			0.024643012	0.105832821
GYD	100169950|F|0--46:C>G	TGCAGGGCCACGTGAGCAAGCCGGTCGGGGAGGTCATCTGCGCCGCCCTCGACAGGCTCGCCACCACCG	chr5R	762654791	SECCE5Rv1G0359550.1	Endo-1,4-beta-xylanase			0.031738731	0.062073583
GYD	100031299|F|0--46:T>C	TGCAGTATGTTTGCGGCGATCTGCCTCAACTAGTATGTACGCTCATTCCAATCAGTTTCAAGGAGGAGC	chr5R	769196632	SECCE5Rv1G0360370.1	OTU domain-containing protein			0.044841481	0.022196112
GYD	100050035|F|0--38:G>A	TGCAGGCTCGCATTAATTGCACGTATTTTCAGCTCACAGGCATCCACCACACACCGTATTCTGTATTTA	chr5R	769298187			0.0421411	0.0496504
GYD	100081776|F|0--6:C>T	TGCAGTCGCCATGCTCACCCCGGCTGATACGGTCTGATGTCGCAACACAATCAGTGCCACTATGCCAGC	chr5R	770109444					0.030260266	0.063381398
GYD	3363909|F|0--36:G>C	TGCAGAAAACACTAATCGGTCAGATAAGCACTTGTTGACGCTAAATCTGACTGGTCGGTCCTGTCTTCA	chr5R	776805330					0.049441361	0.061028423
GYD	5211506|F|0--14:G>C	TGCAGCTTCCTCCAGAGGCGGATCATGTGCTGCGGCGACTGGTAGTGCGCGGTGTAGTAGCCATCAGAG	chr5R	777988514					0.048517124	0.053801856
GYD	5205135|F|0--62:A>G	TGCAGCTTCCTCCACAGGCAGATCATGTGCTGCGGCGACTGGTAGTGCGCGGTGTAGTAGCCATCGAAG	chr5R	778380459	SECCE5Rv1G0361250.1	Beta-1,3-galactosyltransferase-like protein			0.035758276	0.049242246
GYD	100079132|F|0--19:C>G	TGCAGGGGCTCAAGACGGTCGACGGCGAGGACCCGCCCAGGATCCTCCACTTCAACCCACGCCTCCGCG	chr5R	779212361	SECCE5Rv1G0361390.1	Beta-1,3-galactosyltransferase-like protein			0.021246491	0.033571772
GYD	100031110|F|0--45:A>G	TGCAGACCACCGTATGCGCCTGCTAATTAACTTGGCACGCTGCTGATTACCGCAGTAGGTAATTCTACC	chr5R	779601308					0.016415671	0.079001933
GYD	100087196|F|0--16:C>T	TGCAGTCCGACCCCATCAGGCTGATGAGCACGCCCAAGCTCAAGCTCCGCGCCTCCGCGGGCGCCGCGC	chr5R	781113820	SECCE5Rv1G0361820.1	Lactoylglutathione lyase	0.035067	0.0287982
GYD	3742804|F|0--30:C>T	TGCAGGACGATGGAGACCGACCGGCCCGGTCGATCGAGTCCGTCGGTCACTCACGTACACACCCGACCG	chr5R	782318836					0.039365216	0.049546942
GYD	100033389|F|0--40:G>A	TGCAGCTTTAGGAAATCCACGCCTCCAGCTTCGCGTGCCAGCATCCAGCTTCCCGCGAGGAGACACATG	chr5R	785637420					0.048061491	0.029463027
GYD	100076885|F|0--14:T>C	TGCAGCAGTTCCACTCGATCCCCTTCTCTGTGCGCTGCTCAATGGGGTAATCGCGCAGGGCGGCGTGGA	chr5R	787874862	SECCE5Rv1G0362730.1	Hemoglobin subunit alpha			0.022074797	0.098769729
GYD	100077017|F|0--8:A>G	TGCAGATGAGAGCAGCAGGTTGGTTGAGTAATTGGAGCGGGACAACGGACGAGAGAGAGACGTGCCTCT	chr5R	792943394			0.0354014	0.0369154
GYD	100023357|F|0--63:C>G	TGCAGCGATCGGTAAAAATGGGAGCAGACGTGGGCTGGGCACTGCGTGTTTGGGCGATGGGCTCCATCT	chr5R	795129463					0.044331973	0.023898075
GYD	100025019|F|0--12:C>T	TGCAGGCCAGAACGAAGATCCTGGGATAGAACTTGAGAAACTGAGAGATGTCCATCAGTAACAAAAGAG	chr5R	801887607			0.0454971	0.0273332
GYD	3361306|F|0--11:G>C	TGCAGCTACTAGTACGTACAACCACGACGGACACGCACGATTTGGATGTACCTCCGAGCACAGCGCGAA	chr5R	806991083					0.032705894	0.076470866
GYD	100030398|F|0--40:A>T	TGCAGTATGAAGAGGTGAAGTTCAAGGCATTCGATTTGGCATCGAAGCCTGAAGGTGAGGGCACCCCGA	chr5R	807173168	SECCE5Rv1G0365460.1	NAD(P)-binding rossmann-fold protein			0.023581597	0.094724994
GYD	100039002|F|0--47:C>G	TGCAGCGACCGCCCGCTCTCCTTCACCGCGCCGTCGGGCCAGACCGCCTGGAGCTACTACAAGATCATG	chr5R	813577425	SECCE5Rv1G0366510.1	GRAM domain-containing protein / ABA-responsive	0.000456863	0.0874596
GYD	100060597|F|0--53:T>C	TGCAGCAGCAGAACGGCACAGCCAACAAGCATGAATCAAGAGAGTGATGGCGATGATCGCAGAGGCATT	chr5R	818911640			0.0456338	0.024376
GYD	100124905|F|0--52:C>T	TGCAGCCGGTGGGGCGGCTGGTGCTCAACCGCAACATCGACAACTTCTTCGCCGAGAACGAGCAGCTGG	chr5R	822611669	SECCE5Rv1G0367580.1	Catalase			0.047486813	0.085184739
GYD	100061205|F|0--31:A>G	TGCAGCTCACGCAAAAGCAGAGCAGGTTCACACCTGCACGTTTCCCTCCACTTCCCTCTCACGCACACC	chr5R	823104770			0.0167707	0.0717432
GYD	3351628|F|0--32:T>A	TGCAGGTCAACACCAGCTAGGTCTTGTCCGCCTGCAAGCCGCCCGATAGACTCGCCCACCTCCAGCGAA	chr5R	824856760					0.035758276	0.108264101
GYD	3579835|F|0--14:G>A	TGCAGCTCCCGTCTGTGAACCCACCCTGCGGCCTCCAGCTGCCGGCGGCGAACCATGGGATGCCGAATA	chr5R	824886143	SECCE5Rv1G0367900.1	NAC domain-containing protein			0.037825059	0.066190877
GYD	100041187|F|0--38:T>G	TGCAGCCACAAAAGAAGCAAACTACGACGAACTGGACATGCCAGCAGATCAGACACAGGAACACAGAAC	chr5R	826539026			0.0494115	0.0237407
GYD	100068555|F|0--66:C>T	TGCAGGCTCTTGACGTAGGTCCAGGCCTCCCGCTGCGAGACCTTGTCCCACCAGCGGCTGACGTTCCTG	chr5R	826539345	SECCE5Rv1G0368100.1	Glutathione S-transferase	0.0372009	0.0238384
GYD	3347446|F|0--5:T>C	TGCAGTTGCACATATTCAATTTAGTCGATCTGTGCAGTGCAAATATGGATTGACATCTCCTTACTGAAG	chr5R	830038011					0.043426633	0.073051556
GYD	100077741|F|0--34:C>G	TGCAGGACGAGCTCCGCCGCGTCGACCGCAAGACCACCCCCTGGCTCATCGTCTGCGTGCACTCGCCCT	chr5R	831627923	SECCE5Rv1G0368910.1	Purple acid phosphatase			0.044165858	0.061989479
GYD	3597711|F|0--45:A>G	TGCAGCCGAGGTGCTCAACTCGGTGGAGAACTTCGGCCAGTGGAAAGACGCCAAGCAGCACCCCGCCGC	chr5R	832594204	SECCE5Rv1G0368980.1	callose synthase 1			0.028291047	0.118783302
GYD	100080853|F|0--14:C>G	TGCAGGTCGCACGTCGTGTCGGAGTCGGCGACGTGGGCGAGGAACGGGAGCACGCTCTGCTCCGCCTTG	chr5R	836531895	SECCE5Rv1G0369600.1	Cytochrome P450 family protein, expressed			0.047486813	0.078891225
GYD	100109866|F|0--62:A>G	TGCAGTCGCGAGTGAACGAGGAAGCTGTTTTTTTTTTCTTTTCCAATTCATCGTCCAACTCCATGGTTC	chr5R	841359413					0.044589985	0.04488544
GYD	100086204|F|0--66:T>A	TGCAGTGCGTCACGCCGATCGTGTGCGCGCCTGAACGTATACAAATGAGAAACGCAGAGAGGAAAATAA	chr5R	841580925					0.01358027	0.15353969
GYD	100022302|F|0--62:T>G	TGCAGGCTCTTCACCAAAAAGCAAGATCAAGATCTTCTATCACACCGACGAAAAGAAGGTCATGTATGC	chr5R	842350428	SECCE5Rv1G0370510.1	Polyubiquitin	0.0486863	0.0142822	0.044165858	0.060889944
GYD	5218735|F|0--17:A>G	TGCAGCGCCACAGCCTCACCTACCTCACGTCCATGGCACTCAGGTGCGCCATCGAGCTCGGCATCCCGA	chr5R	845286671	SECCE5Rv1G0371010.1	O-methyltransferase			0.035136765	0.11964584
GYD	100012806|F|0--46:C>G	TGCAGCAACAGCAGTACTATATATATACTTGGATGGAGAACGCCAACTCATCGTGGTTCCACGCGCAGG	chr5R	846020657					0.041856561	0.090423501
GYD	5210377|F|0--32:C>T	TGCAGAATGGATGGGGGTGGATGATGGTTCAACGAGCAGTGCTCAACTCGGGTGGGTGCTCTGCTCTAT	chr5R	849817762					0.031140892	0.098291773
GYD	100026743|F|0--53:T>C	TGCAGCTGCAAGGTTAAGAGTTGTAGAATCTAGTGGCGAGAGCTAGCAGAAGATGATGGAGCCATAGAT	chr5R	849836189			0.0254399	0.0395275
GYD	100068146|F|0--14:G>C	TGCAGCATCTGCTGGGTGCTGGCCATCCCGCGCTGGAGCACGGCCATGTCGTCCCGCAGGTCGTGGATG	chr5R	851777895	SECCE5Rv1G0372170.1	RING/U-box superfamily protein	0.0454071	0.0340639	0.017343136	0.07253955
GYD	100139552|F|0--12:T>C	TGCAGTAAGTTGTATTTCAACGACGATGATGAACGCAATCATTTGGTTGGGTATATGTTGGTGCAGATG	chr5R	853429182			0.0479394	0.0333143
GYD	3736610|F|0--39:G>C	TGCAGCCACCGTGAGTGCACGGTGAGTTTCTCCATGCCTGCCACACTGGTGGTGTTCACCGTGAGGAAG	chr5R	855041990					0.044051003	0.109240342
GYD	100028968|F|0--44:T>A	TGCAGACAAAAGGCATCTCTGAATTATCTCCACCACCCGACCGATTTCATTTCAAGAAAGGCAGGCGGC	chr5R	861111126					0.019851493	0.045195671
GYD	3734524|F|0--62:G>A	TGCAGAGTAATTGTCCACCGTTTATTTGTTCTATTAGATATGTACCCAGAGGGCTAATCTGTGCCGTCA	chr5R	862411709					0.038878943	0.129771957
GYD	100028607|F|0--14:T>G	TGCAGATGCCGACATCGTATTTGGCCATGAGTCGCAGCAGCTCCACCAGGACGCAGACGAGCAGCGCAA	chr5R	867593988					0.041827315	0.063170657
GYD	100046880|F|0--62:C>G	TGCAGAGGAGCGAGCAACTGAGGGAGCTCTATGAGTCGCTCTTGTCCGGCAAGGCGGACCACCGTGCGA	chr5R	873860607	SECCE5Rv1G0376740.1	basic helix-loop-helix (bHLH) DNA-binding superfamily protein			0.045322613	0.016896244
GYD	100034030|F|0--17:G>C	TGCAGACTGTGGGTCTTGGACGATGCTGGAGACGAGCTCGTAGGCGCTGCCAATGGCGTACTCCATGCC	chr6R	147215	SECCE6Rv1G0377110.1	GDSL esterase/lipase	0.0456338	0.0294563
GYD	5216446|F|0--21:C>G	TGCAGGGTCAACAGTTGCATGCGCGTTGTTGGAGAAGGTCCCACGGGTCTCGTACCTTCCATTTCCTTT	chr6R	2826679	SECCE6Rv1G0377620.1	Disease resistance protein RPM1			0.048712385	0.097833234
GYD	3363364|F|0--53:T>C	TGCAGCCTCTGCATCCTGCCCCGCTTGGCCTCCCTCAGCCTCTCCGCCGCCGATTCCAGCCTCTCGATC	chr6R	3392720	SECCE6Rv1G0377810.1	65-kDa microtubule-associated-like protein			0.045940124	0.036088069
GYD	5209516|F|0--17:C>T	TGCAGCGTTTCTCCACCCCCGCCTTAATTTGTCACCCACCCAAGAATAAACCCACCCGAAAACAGCCGA	chr6R	3923030					0.04910153	0.078594958
GYD	100041337|F|0--19:A>G	TGCAGCAGGTGCCAACACCACCGTTCAGTCAAGCAAGCCCCCTTCATCTTTTCATCAAGGTTTTATTAC	chr6R	4073735			0.023505	0.0564254
GYD	3364830|F|0--64:C>T	TGCAGCTGCGAGGGTAGGGTGATGCTTCAGATTCTTTCATGGATCGCCTGAATGCCTGATTCAGCTGGA	chr6R	7408126					0.04890562	0.039402609
GYD	100022566|F|0--17:C>G	TGCAGCTGCACTCGGTCCATATAAAGAGGGGCACCGTGCAGCCCAACGATCCTCTCACATCACAGGCAA	chr6R	8069675					0.038879974	0.042077864
GYD	100185201|F|0--65:G>A	TGCAGCCGTTGAGCTTGCAGTCCTGGTAGCAGCACACGTAGCACTGGCAGAACGGCGACGTGGCGGGGT	chr6R	8285004					0.038879974	0.051063723
GYD	100021847|F|0--45:C>T	TGCAGAGCATCCCTCCAGATATCCCATCGCCTCCTCGATTCCTTCCAGATTGTACGCGTCACGCAGCAT	chr6R	9954439	SECCE6Rv1G0378700.1	F-box family protein	0.0456338	0.0291926
GYD	5205700|F|0--26:C>A	TGCAGCGGCGGTGAATGCGGGCGCCACGGACCAAGTCCGTACTCTGGTGGGAGGAGGACGGACGGAGGA	chr6R	13048206					0.039361755	0.050825036
GYD	100183141|F|0--51:G>C	TGCAGCATCACCACACCGAAGCAGTACACGTCACGGCATGTGGCCGCCTCCGTTGTTGCGGCTTCTTCC	chr6R	19447385	SECCE6Rv1G0380100.1	Receptor-like protein kinase			0.013856517	0.124255828
GYD	3899332|F|0--14:G>A	TGCAGGGTCCCGGGGAGAACCTTCAAATCCGCCCTCGCCGTGTGCGACCCCTTGTCGCGGCGCTACGTG	chr6R	19808109	SECCE6Rv1G0380210.1	F-box domain containing protein			0.012454169	0.113166545
GYD	100061420|F|0--55:T>C	TGCAGAGGTGGGCTGGTTATGTTCTTCGTGGTGAACAAAATATGTGGAGGTAACCTGATCCTGCACACA	chr6R	19981856					0.018984976	0.0809093
GYD	3353308|F|0--6:G>A	TGCAGCGTTTGCGACTTGAACTTGATCCTTCCCACCGTAGCGCTCATGCATCGTCAAGCGGTCGAGGTC	chr6R	21010624					0.039438071	0.090172904
GYD	100026889|F|0--25:C>T	TGCAGGTCCATGACGTAAAGGGCGTCGCCGACGGCGATGGACATGGAGGTGCGCCTGGGGGCTATCATC	chr6R	21878890	SECCE6Rv1G0380340.1	Phosphatidylinositol-4-phosphate 5-kinase family protein			0.044331973	0.084591101
GYD	3745765|F|0--22:C>T	TGCAGAAGATGTCGATGTCGGGCTTGCCCGGCGGCGGCGGCGCACAGCCCAAAGCATGTATGCAGTTCG	chr6R	24768532	SECCE6Rv1G0380740.1	N-lysine methyltransferase			0.035758276	0.092943126
GYD	100148105|F|0--6:T>G	TGCAGATTGTGAATGATGGAGATGCAGTTAAAGTGTTCGTGTTGAGGCTGGCACGGCCGGCGGATGCTC	chr6R	29316715					0.034392737	0.095128699
GYD	3600696|F|0--26:C>G	TGCAGCTCCAGGCCCAGCTCCTCCTCCACGTCGTCGGACGCCGAGATCAGCAGCAGCTCGCACCCCTCG	chr6R	29317833	SECCE6Rv1G0381060.1	F17F16.3 protein			0.024643012	0.077505904
GYD	3365059|F|0--17:A>G	TGCAGGTTTGGAAGGGGATCACCGATAGGGAGCTCGATGTGCTGGACATCTTTGAGGATGAGGAGTATG	chr6R	30750318	SECCE6Rv1G0381240.1	Protein AIG2			0.027482831	0.13269031
GYD	100180562|F|0--64:T>G	TGCAGCAGCTCCTCAGGAAGTGGAAGCGGCTTGCGCTCGCGCCCAAGGCCGGCAGCAGGCACGGTGGTG	chr6R	33318797	SECCE6Rv1G0381520.1	SAUR-like auxin-responsive protein family, putative			0.015498918	0.213553246
GYD	100180562|F|0--67:T>G	TGCAGCAGCTCCTCAGGAAGTGGAAGCGGCTTGCGCTCGCGCCCAAGGCCGGCAGCAGGCACGGTGGTG	chr6R	33318797	SECCE6Rv1G0381520.1	SAUR-like auxin-responsive protein family, putative			0.019851493	0.146206155
GYD	3589480|F|0--66:G>C	TGCAGAAGGGAGCAAAGTCCTTCAGAGTTTGCACTACATTTGCTAACTATGGTAGTTACAGGTAATGTG	chr6R	33319235					0.025773635	0.190062627
GYD	5217893|F|0--19:G>A	TGCAGCCGCTCCAGGACAGGACCAGCGACGCCTACCGCTGGATGGTGCACCACGGCGAGAGGTACCGCG	chr6R	34338821	SECCE6Rv1G0381620.1	Glycosyltransferase			0.040399652	0.048348659
GYD	100058094|F|0--61:A>G	TGCAGAAACGGCAGAGGTGATCAGACGAGGAGGAGAGCACGCACACAGCACACCACGCCGTACGCTTCG	chr6R	38803311			0.049839	0.0416501
GYD	100006613|F|0--36:G>A	TGCAGCGGGCATTTGGGGCACTTAGCATCATGAAAAGTTTGAGTTTTAGTTGTGCCAAATCTTAGACAA	chr6R	43431123					0.044841481	0.038916814
GYD	100019611|F|0--53:G>A	TGCAGCACGCTGAGGTTGTTGTTGGCCTTCACCGCGTACCCCACGATTGAGCGGAGCCCCTGGAGAGCC	chr6R	43766863	SECCE6Rv1G0382510.1	Diaminopimelate decarboxylase	0.0378226	0.0460857
GYD	100163172|F|0--14:G>A	TGCAGGAGGCGGAGGCCGACGCCGCCAATCGTCCCCGCCGACCCCTGCGGGCTGTTCATCCACAGTCCG	chr6R	44673592	SECCE6Rv1G0382590.1	CASP-like protein			0.041722713	0.046548383
GYD	100002534|F|0--62:C>G	TGCAGGTTCCTCTCGAACTCCCTCAGGTAGTCCAGGAGCAAAACGATCACGAAGAGGATGAACCCACCG	chr6R	47170355	SECCE6Rv1G0382730.1	Embryo defective protein 1303	0.0224814	0.0361536
GYD	3737773|F|0--17:A>G	TGCAGTAGCAAGCAGCAACGGCCAGGAGCAGAGCAGCGGCAACGTAGTAAAGCAGCAGCGGTAGTAGAG	chr6R	50779728					0.03454089	0.108909905
GYD	3746580|F|0--25:G>T	TGCAGCTGTTCGTGCTGCTCATCTTGGCCTCTCCTGCCACCGCATGCACCGAGCAGGAGAAGCGCGACC	chr6R	51891960	SECCE6Rv1G0383300.1	Leucine-rich repeat receptor-like protein kinase family protein			0.02096511	0.129197945
GYD	3893763|F|0--64:G>C	TGCAGCCTTTCAGGCTTTGGTGATACGGTGGATCAGCGAGTTGGTGCGTTCTGTGTGCTTTGGAGGACA	chr6R	54389460					0.01502671	0.104847485
GYD	100046416|F|0--46:T>C	TGCAGCGACGGCGCCGAGTACGTACGCAACCAACTCACTCCATCCATATCTCTTGCTGCTTGGTTAGCA	chr6R	54398618					0.032670477	0.025089858
GYD	100017051|F|0--36:G>A	TGCAGCCGGATGGCGTCGTCGTCTCCCCGCGAGATGGGCGACGGCGGTGAGCGCGGCGCTGCGTGGCAC	chr6R	54420273					0.028100521	0.08029103
GYD	3363157|F|0--35:A>G	TGCAGCAACTGCATACACTGTAACAAGGAACATATACTCCTATTTTTTTTGCGAGAAACAAGGAACATA	chr6R	60406796					0.020813369	0.144846695
GYD	100061355|F|0--17:T>G	TGCAGCTTCTGCGCCTTTTGCTGCTGCCCCAATGCAGTTCTTGGGGTTTTAACCCCACGAGTGGTGCTC	chr6R	65401750					0.039361755	0.027435322
GYD	100030971|F|0--45:G>A	TGCAGCGTGTATGTCATTTGAGATCCTACCGATGACTGTATTCAGGATAACGCGAGTACAAAACCAGCC	chr6R	102506023					0.017222242	0.056868156
GYD	100030069|F|0--14:A>G	TGCAGGAGGCGACTATCCGATCACAATGCTCGGCGCCGGAAGCCACAGCCAGACGCATTCTCCTTTGCA	chr6R	103640001	SECCE6Rv1G0386950.1	Squamosa promoter-binding-like protein	0.0167123	0.0705481
GYD	100034940|F|0--62:G>T	TGCAGTGGGAAACAGACTGACGATACATGTGAGGTCCGTGAGCTTTTTGTTTCAGTGCTTTTGACAGCA	chr6R	129716980					0.020060947	0.037758215
GYD	100112208|F|0--38:A>G	TGCAGCTCGTGTTGCAACTTGCAAACCAATCATTTTCTATTTTGACAAAGAGGTGTTTGTCGTCTGTTT	chr6R	130379581			0.0473232	0.0519314
GYD	3746984|F|0--11:A>C	TGCAGAACGGGATAACCACCTCGCCACAGTACCGCTAGTGACCTACAGGAGGTTAGACTCCTTTTATAC	chr6R	134463603					0.040332087	0.078267773
GYD	3906197|F|0--44:T>C	TGCAGCGTGTGCTGGAGGAGTTGAAGAAGAACGGACGGCTCTCGTCTATCTCATCGAACGGTGTACGAG	chr6R	135367599					0.034227875	0.055429043
GYD	100028130|F|0--45:T>G	TGCAGAATCCTGACATAGTAGTTCCAGCTTCCAACCCTGTTCATATACAGAGCTCCGAAATCTCTAGGA	chr6R	141258856					0.034325179	0.024782048
GYD	3739373|F|0--41:C>T	TGCAGGGGGAGGTCTAGGCCCGAGCGCATCGGGAAGGATGGCGGCCGGCGATGCGAGTGACCGCGGACG	chr6R	150994862					0.017062683	0.131772024
GYD	100033166|F|0--59:T>C	TGCAGGCTGCTGCTATAGTGCAGGGCTGGGTGCACACGTCATGCGGTCACGCTTGCACATCGCTGACCG	chr6R	170856090			0.041113	0.088204
GYD	100048828|F|0--64:C>T	TGCAGGCTTGCTCCACGCTACACGCATCCACGCACGCCCTTGCCTCTCCAATGGGCATCCATGGCCGTA	chr6R	206686496			0.0427823	0.0257174	0.036520458	0.024931343
GYD	100080430|F|0--61:T>A	TGCAGGCTTGCTCCACGCTACACGCATCCACGCACGCCCTTGCCTCTCCAATGGGCATCCATGGTCGTA	chr6R	206686496					0.014882731	0.101675
GYD	100025996|F|0--7:G>A	TGCAGTGGTGGATCAAATAGTGCTAAGCGCTCCTCATCATTATGCAAAGTACCTTTGGTACATCGTCAC	chr6R	213245146					0.039369978	0.08772329
GYD	100047010|F|0--33:A>G	TGCAGGCACCCTGCTGCACCAGACACAGACTGGACGCACAGGGCATGGCGTTCATCTTGTGGTCGGGAG	chr6R	244917369			0.0340684	0.0434508
GYD	100029013|F|0--39:C>T	TGCAGTTATCTGAGATAAGCCTGCCAGATTTAAGGGATGCGCTGAACTAGCACACTGCTACCATGGACA	chr6R	244925634			0.0304162	0.0290243
GYD	100086654|F|0--10:A>G	TGCAGCCGCTATTGTGACCGCCACGGCCGCTCGCCACATCTCCGTCGGTGTGATCCGCCACGGCCGCTC	chr6R	311614247			0.0122572	0.0884
GYD	3587191|F|0--40:A>G	TGCAGAGCCGCCATCAGCGTTTGTCGCCTGGGCGAGGAACAAAGCACGCTCTGGAGGTCCAGCTCCGAG	chr6R	321723905					0.019573607	0.091255493
GYD	100017822|F|0--32:T>C	TGCAGCGGCGCTCCTGGCCGGTAGAGGAGGAGTGAGAGGCCGCTGCTTCCTCAGCATGGTCCTGCTCGC	chr6R	339491362					0.033571901	0.153976567
GYD	100009791|F|0--15:C>A	TGCAGTATATAATACCAATAAAACTTAGTTATCAACAAAACCGAGCTAAGTAATTTAAATGGGCAAAAC	chr6R	402383248					0.02657458	0.07868971
GYD	100036765|F|0--40:G>A	TGCAGAAAGAGCCACTCGCGCTGCAATGTCCTTGACGCTAGTTCCCACCCCGCTGGCTCTGACACCTCA	chr6R	419527660			0.0430204	0.0186658
GYD	3363334|F|0--40:A>G	TGCAGAAAGAGCCACTCGCGCTGCAATGTCCTTGACGCTAATTCCCACCCCGCTGGCTCTGACACCTCA	chr6R	419527660					0.01358027	0.156532473
GYD	100017863|F|0--66:C>T	TGCAGCGGCTCTCTCGAGATCTCCGACCGGCTTCACCTTGACGTGTAAATAAACTGTAGGTAGAGACGG	chr6R	434211036					0.040399652	0.048556153
GYD	3745685|F|0--16:A>C	TGCAGTGAAGCAGCATAGCTTGGCGAGGGATGCAACATGGCGGAACAGCAACAGAAATTCAACAGGCAG	chr6R	435876461					0.031738731	0.056778693
GYD	3744971|F|0--57:T>C	TGCAGCAAGCACCATTCAAGCTACAGGGCACTAGGTTGAGCTAGCAATGGCCAAGGATATTGAGGCGGC	chr6R	436070082					0.031738731	0.056778693
GYD	3750302|F|0--7:G>C	TGCAGAAGCTGAGATGTATGGTTTTTTCCCATGTTTGCATTACAGAGGTGGAGGCTTCATCTCCTTGGA	chr6R	448180655					0.018210405	0.204596227
GYD	5215025|F|0--40:C>G	TGCAGGCTTCTTCCACAGTAGAGTGATCAGCCGAGCAGTACGACCTTGATCGTTGAGGTGAGTGATGCT	chr6R	451090240					0.024637519	0.103507306
GYD	100012252|F|0--54:C>T	TGCAGTTGCCTCTGGTTTTATCTGTGGAGATGGTATATGGATGTTCCCTTCTTCCTTGCTCTCCCTTGC	chr6R	451187432	SECCE6Rv1G0400400.1	Yellow stripe 1A transporter			0.042198831	0.095957766
GYD	100147244|F|0--23:A>G	TGCAGGTCAGGAGCGCCACGTCCACCGCCGTGTCGATCATGTTGTCCATGAAGAAGACGTAGGCGGTCA	chr6R	453848227	SECCE6Rv1G0400520.1	transmembrane protein, putative (DUF247)			0.009770652	0.231449508
GYD	5201337|F|0--27:G>A	TGCAGTGCAAGTGTGCAAAACGGTGGCGGGCATATCTAGGCTCGCTCCTGTTGCATGGCGCTGCTACTC	chr6R	453849755					0.003682333	0.299231818
GYD	100112198|F|0--66:T>C	TGCAGGCAGCAACAGCACATTTAGAACAGCTCTTCAGCTCAGCGCACAGCAGTAAGCCATGATCACTAG	chr6R	453968030					0.012454169	0.16232701
GYD	3594690|F|0--55:A>T	TGCAGAAATCCAACTCCTGACTAAACTGTTATCAGCGGGGAAGACGACTCCCCTTATTTGCGTATTATT	chr6R	454214657					0.003682333	0.299231818
GYD	3742475|F|0--23:G>C	TGCAGCGGCGACGACGACGACGCGGCACGGCCGGCGCCCGCCACCAGCCACAGCGGCAGCAGCATCTCC	chr6R	454215680	SECCE6Rv1G0400560.1	Zinc finger, B-box			0.035144443	0.118228339
GYD	100106218|F|0--68:C>T	TGCAGCCACTGCGGCGTCCAGAAGACGCCCCAGTGGCGCGCGGGGCCGGAGGGCGCCAAGACGCTGTGC	chr6R	454748973	SECCE6Rv1G0400580.1	GATA transcription factor			0.025213359	0.163209705
GYD	100013116|F|0--7:G>A	TGCAGCAGCAGTGCAGCAACATCAGCCAGAAGACACAGCAAGGAGGAGCCACAATAGCTAGCAATGGTT	chr6R	455152222			0.0310674	0.0440331
GYD	3743748|F|0--7:A>G	TGCAGCAACAGTGCAGCAACATCAGCCAGAAGACACAGCAAGGAGGAGCCACAATAGCTAGCAATGGTT	chr6R	455152222					0.029704328	0.110391131
GYD	100031025|F|0--34:G>C	TGCAGGTGGACGGCTGCTACGTGCGGTACGACGCGAGCGACTTCGTCGGCCGGGCCGACAACACCGTCG	chr6R	455805739	SECCE6Rv1G0400650.1	Cysteine-rich repeat secretory protein			0.022513237	0.110304425
GYD	100033411|F|0--17:A>G	TGCAGAATTACAAACGCACCCCTTAATCTGACCAAATGTCTAACAAATTTCAAGAAACTCTATATTCCT	chr6R	458529869			0.0445123	0.036134	0.04910153	0.02641089
GYD	3748723|F|0--64:A>G	TGCAGCTGGGGAGTGGTGGGAGGCAGCGAAGGCGACCATCGCGGCGTACACGGGACTGCCGCCGAAGGC	chr6R	459430539	SECCE6Rv1G0400880.1	Membrane steroid-binding protein			0.035665402	0.072836206
GYD	100027491|F|0--9:A>T	TGCAGTCAAATTTTTAGAGGATTAACTGTAGTGTTAACTTCGCAAGAAAAGGGGCTGAAACCCTCGCAG	chr6R	459453432			0.0333871	0.0521526
GYD	100055902|F|0--67:G>C	TGCAGGGCACCTTCGCCCTCGTCCTCCGCGCCTACAACCCCAACAAGCGCACCGCCGTGTACCGCTCGC	chr6R	463783700	SECCE6Rv1G0401180.1	Late embryogenesis abundant (LEA) hydroxyproline-rich glycoprotein family, putative	0.0215265	0.12302
GYD	100007320|F|0--37:T>G	TGCAGTGTGATATTCTGGAGGAATCTTGCTGACTGATTTCCTGTGCGATGCTCAATGTGCAGGTGAAAA	chr6R	469263358			0.0454071	0.0160845
GYD	100045753|F|0--46:T>G	TGCAGCAGTGCCTCTCGTTTTCTCTTGGTGACCTGAATCATCCTCTTGCTACGTGCGTTTGCGTGGAGC	chr6R	474105445			0.0254399	0.0497904
GYD	3595739|F|0--20:T>G	TGCAGCACAGACTGCGTGGGTCGCGCGTCCATAAAATATCGCCCCCCATCGTCTCATCTCCGCGCTGTT	chr6R	475112611					0.031535555	0.096430623
GYD	5043587|F|0--20:C>T	TGCAGAGTGATAGATATATTCAACGGAACTCCGTGCTTCCATCGCATTATTGCAACCCCACCTGTTTGT	chr6R	475112949					0.027677953	0.128703338
GYD	100029580|F|0--28:T>A	TGCAGGTGCAAGCGCGCAGTGATTCTCATAATGCTGTTCCACGTCAAACGGACGAGCGCTGAAGTCCAT	chr6R	477185806			0.0277462	0.0898084
GYD	3579336|F|0--44:C>T	TGCAGAATGGCGTGTCCCCTCTGAAGGACCAAACATGGCGTACGCGCACAATGTCAATAACATTTTTCT	chr6R	483145316					0.038137385	0.119324226
GYD	100111493|F|0--17:C>T	TGCAGCCTGGCCGTGTGCTATCCGGCCGTCCGGTCGGCATTGTTTGTGTTTGAAGGGAAGCCACGTCTG	chr6R	483267670					0.025773635	0.174648596
GYD	100185564|F|0--68:A>C	TGCAGGGACACCGTCATGACCATCTGGCATTACCACGGCGGGTGCCAGGTCGGCAGAGTCGTCGACCGA	chr6R	490034389	SECCE6Rv1G0402840.1	Oxygen-dependent choline dehydrogenase			0.036710684	0.080251359
GYD	100008498|F|0--28:G>A	TGCAGGTCGATTCCTCGGCCTCTACATCGGTTTCAATTGATAAACAACGTGACGTAGCTGCTTCGTTTC	chr6R	491426317					0.048964942	0.075367716
GYD	3363478|F|0--6:C>G	TGCAGTCAATCCAACGGACCGAAAGAAAGAAAAATATTCAGTCGCCTGCTCAATAGTCCCCAAAATTCT	chr6R	498032128					0.034719536	0.081681085
GYD	3596017|F|0--58:C>T	TGCAGTCGTTGGAAATCCAACGGCTGCGGTATCGTCTTCCTCCTCCCGACCTCAGCTGCATCGCCACCC	chr6R	498032131					0.034719536	0.081681085
GYD	3344364|F|0--59:T>G	TGCAGACACATAAAACAGAAATGATATAACCATGCAAAGTTAAACAAGGATTATACCATTCGCACGGCT	chr6R	503697754					0.01376383	0.202750336
GYD	5220291|F|0--16:A>G	TGCAGATCTGGTAACAAGATGCAACAGAGTCCGCGTTCAAATTTCTTTGCGCTAATCAGAGGTGATCGA	chr6R	517653579					0.038879974	0.084619845
GYD	100004459|F|0--54:C>G	TGCAGAAAATCTTAAAAATATTCCAGACATACAGTAATCTTCGATATATATCGTCATAAATATTCCCGA	chr6R	518955256					0.037934334	0.047212985
GYD	100053706|F|0--67:G>T	TGCAGCCCCATGAAGTTTATCTCCATCAGAGGGGGACCTCCACGGCGGTACTCCTCCCAAAATGATTGG	chr6R	519321604			0.0479394	0.0221194	0.025908954	0.038607469
GYD	5044242|F|0--30:G>C	TGCAGCTTGGGGGAAAACCCTTATCCCACGGTACTGACGATGGCGGCGCATTGGTGTTGTTTTTCCTCT	chr6R	521914129					0.049941936	0.060048765
GYD	100027424|F|0--47:G>C	TGCAGCCGATCGGTTGAGCACCAAACCATCATCATGAGGAAGGAATTGATAATATCAAAATTAAACTAA	chr6R	523684265					0.024383558	0.044524204
GYD	100079379|F|0--7:A>G	TGCAGGAACTACGCGCAGCGCCAGGCGAGGACGCGGCCCGCCAGCTGAATCGCGAGGCGGCGCCGCGAG	chr6R	523763918					0.029574611	0.105878196
GYD	3887007|F|0--51:T>A	TGCAGGACTTGCAACAGATACGCGCCGATGCAGCCAAGGAGGATTGGAGGATCGAACAGGCGAAAAGCC	chr6R	524666985					0.045864404	0.056969551
GYD	100043767|F|0--8:C>G	TGCAGGTACCCGAACGCGCCGCACAATGCGCGGTACTTGTCGTCGTCGTCGAGCAAGCCCTGGAAATGG	chr6R	529985786	SECCE6Rv1G0405360.1	basic helix-loop-helix (bHLH) DNA-binding superfamily protein			0.036907805	0.031091887
GYD	3744858|F|0--25:G>A	TGCAGGCCAAGAAACAGGGGCGGCCGCGTTTAGGAAAAAGCAGAGGAGCGGCCGTAAACCGCCATCCAA	chr6R	530345963					0.019851493	0.092179353
GYD	3909072|F|0--37:A>T	TGCAGAAACTCGTAGAGCTGTTCCTGAAGGGAATCCAAGCTAACATAAAGAGGGAGGTTTATTATTGGC	chr6R	530347821	SECCE6Rv1G0405430.1	Replication factor C subunit 3			0.028692066	0.064053852
GYD	100017721|F|0--54:A>C	TGCAGCAGCAAGAGATCAACTGACAGAATAGCTCTGCAACGAAAGCAGATGCAAAACAATCAAATGCAT	chr6R	536588393					0.019843547	0.089429801
GYD	100069055|F|0--24:A>C	TGCAGGGGGCGGCATCAGGCTGATATGCTATGGCTGTCGTTCCTCGTCGCAGAGGCAGACTACCAGACC	chr6R	542037587			0.0372009	0.0310819
GYD	100012991|F|0--46:G>T	TGCAGTGCCACGAGTGTCCAGCACGAGCAATAGTCGGATTAGCGAAGGAAGCATTCAGATTACTTCGCC	chr6R	550531708	SECCE6Rv1G0406790.1	Methyltransferase	0.0215265	0.0518103
GYD	3580526|F|0--49:C>G	TGCAGAGTTTTCCTCTAGATAGCAGCACAATCCCAAGCGCCAATCAAAGCCCATCATCACTAGCGAGCT	chr6R	551687592					0.012840576	0.22603411
GYD	5202819|F|0--6:A>T	TGCAGAACGGTTGGGTGGCCAACACAAGGAGGTTAAGGACAATAATCCATCCCAGACCAAGATACTCAA	chr6R	553242493					0.033684151	0.117107579
GYD	100040004|F|0--34:G>A	TGCAGCCCACTGGGACTAGCGAAGCGAGGAGAGCGTGCACCCGCTACCAAATAGACTGTATTTGTTTGT	chr6R	553593423			0.0215265	0.0553624
GYD	100008301|F|0--53:G>T	TGCAGCTGCACGCCTCCCCTATAAATCCACCCCGCTGCGCTCCCGCCTCCATAGTCACAGGCCATCCGC	chr6R	555360460			0.0409358	0.0433084
GYD	100075744|F|0--56:C>T	TGCAGATGATGATGACGCACCTGAAGGGGCCGCAAATGGAGATCTTGACAAGTGTTCAGATGAGGAGGT	chr6R	558789856	SECCE6Rv1G0407500.1	tRNA (Guanine(9)-N1)-methyltransferase	0.0215265	0.0495545
GYD	100028664|F|0--54:C>T	TGCAGCTGCTGAGCCGAACTGTGAGGAAGGAATAAGCATGATGAGCATTAATGACAGTGGCGTCAGTAA	chr6R	559225146	SECCE6Rv1G0407580.1	CONSTANS-like zinc finger protein			0.017343136	0.066828903
GYD	100022606|F|0--28:C>T	TGCAGTGGAATATCAGGTTTCTTCGGGGCGCGGAACACAAACCCCGTCTCCATTTTTCCAAGCACGTAC	chr6R	560350598					0.028113358	0.078337477
GYD	100042220|F|0--67:C>G	TGCAGGGGCTCGTGAGCAAGGGCCTGTGGGAGGACGCCATCGACTACCTTGATGGCTTCCTGCCTGCCG	chr6R	563295622			0.0382962	0.0375305
GYD	3907793|F|0--10:G>A	TGCAGCAGTCGGGCGTGCGCGGAAGGACGTCGCCGCCGCCCGTCCCTCGCTTCGACGGCGTGAGGGTCC	chr6R	563745594	SECCE6Rv1G0407810.1	Ethylene receptor			0.017062683	0.087333492
GYD	100006260|F|0--58:C>T	TGCAGATACCTGGAAGATTATATTGCAGAACGAAGAGGTTAAAGCTCCTGTAAGTTTGCTTGCCCTGAC	chr6R	566145645					0.048517124	0.027987813
GYD	4104575|F|0--16:G>C	TGCAGGTGTACCATCCGAACATCGGGCCGGATGGGAGGATGGCCCTGGACATCTTCGGGGAGTGGTGGA	chr6R	566995104	SECCE6Rv1G0407990.1	Ubiquitin-conjugating enzyme E2			0.035144443	0.095605496
GYD	100048252|F|0--21:G>C	TGCAGTACAGGCACGAGCGGGGCCTCTTCGAGCAGAAGGCCAGGCGCTGGACCCGCAGATACGCCTCGG	chr6R	566995266	SECCE6Rv1G0407990.1	Ubiquitin-conjugating enzyme E2	0.0219194	0.0336506
GYD	3734956|F|0--16:G>A	TGCAGCCGAACTGGAAGTCCTTGACCGCGTCCGAGCCCAGCGACAGCGTGTCGGCGCCGTAGGTGCCGA	chr6R	569766172	SECCE6Rv1G0408060.1	Eukaryotic aspartyl protease family protein			0.01502671	0.091929873
GYD	100008596|F|0--17:C>T	TGCAGTTTCCATGTCTCCAGTAGCGTCTAGGTGCATAGTCCGTTGGTAATAATGTTCTAAGGTTGCATT	chr6R	571967609					0.041827315	0.041892302
GYD	100009682|F|0--6:C>A	TGCAGGCTATATATCTAACCATATCGCCGCATTGCCCATGCATGGAAAAATGAACACCGAGAAAGGGCG	chr6R	576590537			0.0421411	0.046723
GYD	3750003|F|0--42:G>C	TGCAGAGAAGACAGGGGACGCCATCAAGGCAGAGGAGCGGCCGGGGATGAGCAAGGGAAGCGTCAAGGT	chr6R	578546373	SECCE6Rv1G0408940.1	Glycosyltransferase			0.011879087	0.188030262
GYD	100046576|F|0--39:T>C	TGCAGTAGTAGCGAGGCGATGGATCTTTACATGTGGCGCTCGCTCACAGGCCGAGCAGGATGTAGTAGA	chr6R	581171812					0.026148289	0.028529105
GYD	3590224|F|0--48:A>G	TGCAGAGCAAAATGGGGCAGCTGGGAGCGGATCCAAAGCCGATCCGTCAGCTCCTGTCTCGGCGGCGGC	chr6R	582598670	SECCE6Rv1G0409160.1	Starch synthase, chloroplastic/amyloplastic			0.026307875	0.066565644
GYD	3747881|F|0--14:G>T	TGCAGAGAGGCTGGGGGATTTATATCTACCAATGGGCACATCTCTGCCATACATCCAACCATCGTCCAT	chr6R	586457891					0.043426633	0.087700141
GYD	3575914|F|0--14:T>A	TGCAGCCGCCCACGTCGACTCGTAAAGACGTTTTTCCGAAAACTATAAACACGTTTTGTGGGTTGACGA	chr6R	587925761					0.039361755	0.0771243
GYD	3362647|F|0--35:A>G	TGCAGCTGCGTACTATCGTACGTACATTCTACTACACAGAGACTCAGACAGCAGACTGAAATACGTACT	chr6R	587927641					0.025473967	0.203135969
GYD	3882451|F|0--20:C>A	TGCAGGTAATCCATCCCTGACATTAAAACGCACATCCTGCTCGTTGACATTGCTCATAATCAAACCCAG	chr6R	593016600					0.049441361	0.050378018
GYD	100051335|F|0--18:G>A	TGCAGATTGGCATGAGGTGAGACTAGTCAGCGAGATTAATCAAAAGGGTTGGTTAAGGATTGATGGTTA	chr6R	594350065			0.0324121	0.0571237
GYD	100123569|F|0--13:C>G	TGCAGAGCCAACACCCAAGACCTTTAACTTCCACCCAGATCGGTCAGAGAGACAGGCAGTCATTGGGTC	chr6R	598747097					0.049060631	0.044237326
GYD	100126270|F|0--20:T>A	TGCAGGATGCGGCGGGACGGTCTGCCGGTCAGCAAGTTCATGCTCCCCAGCGTGCTCAAGGCCTGCGCG	chr6R	599162179	SECCE6Rv1G0410530.1	Pentatricopeptide repeat-containing protein			0.036520458	0.049004097
GYD	3591639|F|0--23:T>C	TGCAGAAAGGCGGCAGTTGCAGCTGGGAGAGTGACTGAATGAATGTTGTAAACACTCATTGGTCAGCAG	chr6R	601862091					0.009770652	0.150032621
GYD	100078965|F|0--28:C>T	TGCAGCTGCGGGCACAAGGTGAAGACGCCCTCGTAGGCTGCCGTTGGAGTGGATTTCTGAATGCCTTGC	chr6R	605011374	SECCE6Rv1G0411000.1	F-box family protein			0.012454169	0.149373604
GYD	100003539|F|0--18:A>T	TGCAGGTCAGCTACAAGTAAACATCATCTACATACCTAGTAATGAAACATGGAGCTCACATAAAATGGG	chr6R	605037389					0.019843547	0.04605256
GYD	3594164|F|0--51:C>T	TGCAGCTGCATCGACAACTCTAGGTTCCATAGCACGTCGCCCATGGCCGGCCGCTCCGTGCCTTGGTGC	chr6R	605947080	SECCE6Rv1G0411170.1	Receptor-like kinase			0.041676209	0.04861656
GYD	100028115|F|0--62:G>A	TGCAGCGACTCCCCGATGGCGTGCGCCTCCCGCAGCCGCATGTCCTCCGAGAGCACGATGTCGACCTGG	chr6R	606281283	SECCE6Rv1G0411230.1	Metal tolerance protein	0.0333871	0.0264381
GYD	100067543|F|0--18:C>T	TGCAGGTGGGCGCTTTCCCTGGTGGCCGCGAGGTCATCCTCCCTAGCATTATCTCGGCGCTGGCTATTG	chr6R	606437951			0.0356856	0.0372377	0.023581597	0.042554765
GYD	4492003|F|0--7:G>A	TGCAGCCGCACGCCGACTCATCGAGGCTCGAGGTCAGGTGAGATGCAATCCGACCACCATGGGAAGCGC	chr6R	606437954					0.0321909	0.080509586
GYD	3597902|F|0--10:C>T	TGCAGCCGCCCGTCTGGGTGGCGTTCCTGCTGTTCGGCCTCCTCCTGGGCGTGCCGTACGGGGTGTTCT	chr6R	606838819	SECCE6Rv1G0411400.1	Protein PAM68, chloroplastic			0.034670668	0.052714094
GYD	3345381|F|0--45:G>A	TGCAGGCTGAGTCCAAGTCCAAGCAGGTAATAGCCTACATCAACTGCTGATTTGTCCATACCATTATCT	chr6R	607039071					0.03072287	0.163063834
GYD	5138781|F|0--10:T>C	TGCAGCTTGTTGACGAGCGCGGCGGCGCGGCCGTTGGTGAGCAGCGTGGCGTCGGAGGTGAACATCCCC	chr6R	607262949	SECCE6Rv1G0411450.1	Peroxidase			0.022117626	0.071543179
GYD	100025720|F|0--67:T>G	TGCAGCCCGCACACATAAACGTAAGGATCGTGGTCATGTCATGTACGTGTACGTCCTTGTTTTGCAGTT	chr6R	607263135			0.0382503	0.020028
GYD	100125223|F|0--24:G>A	TGCAGACTAGCGGTGGTGGGAGTAGTCCAGCTTTGCAGCCGCAGCAAGCTAGGGAGGGAGATTACTCCC	chr6R	608308252			0.0408239	0.0266314
GYD	100106381|F|0--59:C>T	TGCAGCCCGCTGACCTGGTCGTCCTGGAACAGCAGGATCACGCCGCCGGCGTCGGTGTGCGCGCGGAGG	chr6R	609164126	SECCE6Rv1G0411660.1	1-aminocyclopropane-1-carboxylate oxidase			0.017272799	0.089977641
GYD	100054913|F|0--68:G>A	TGCAGGAACCGTTTGTCGGCATCCCCGAAGAAATGATCCGCGACGCGCTCAAAGTCATCCTTGGTACTG	chr6R	609296156	SECCE6Rv1G0411670.1	Tyrosine-protein phosphatase	0.0486306	0.0314936
GYD	3901983|F|0--11:T>C	TGCAGCCACGCTGGACTCACCGACGAGGGGCTGAGGTACTATGACGCCATGAAGGTGGAGCACGGCATC	chr6R	611680698	SECCE6Rv1G0411980.1	Pentatricopeptide repeat-containing protein			0.042821004	0.063851216
GYD	100023464|F|0--14:G>A	TGCAGAAATGAATTGAGCAGCAAAAACACAGCCCAGGGCACCTATATATATGCAAGGGAAAATTCAGTA	chr6R	612117015			0.0286511	0.0574986	0.035823459	0.128816222
GYD	100034491|F|0--35:G>C	TGCAGCTTCTGCATGCATGCGCTTGCTTATCCATTGGTCGTCGTCATGCCGTCATGTTACGGTCGCCGA	chr6R	612458011					0.025561074	0.069473503
GYD	100065769|F|0--13:C>T	TGCAGCTCCGCCACGGCCCCGGCCGGCACGCCGTGGCCCACCAACTGGAAGATGCCCCACTCCCTCGCC	chr6R	614054845	SECCE6Rv1G0412350.1	Flavonol synthase	0.012453	0.0517316	0.021697858	0.031570427
GYD	100129706|F|0--30:G>A	TGCAGGTTCATCGACATCGAGCAGTTCACCGCCGAGCTGCGCAGGGCCGGCTTGGACGAGCGCGCCTAC	chr6R	614241620	SECCE6Rv1G0412410.1	ARM repeat superfamily protein			0.02657458	0.089658667
GYD	3361264|F|0--40:C>G	TGCAGTTCAACCTTCTGGGCCTGCACATACTCAAGAAGCTCGCGAGGGACCACGACAACTGCGGCAAGA	chr6R	614242500	SECCE6Rv1G0412410.1	ARM repeat superfamily protein			0.038878943	0.071349086
GYD	100149912|F|0--15:G>A	TGCAGGGAAGGTGAAGATGCCAGACAGGGCGTCCCTGAACTACCGCTCCTGCATCGGGCTGCTCGACAC	chr6R	614620716	SECCE6Rv1G0412430.1	Lipase			0.029555019	0.089604023
GYD	100093121|F|0--25:T>C	TGCAGCCCAGGCCCAACATGCTCCTTTTTCACCTCTTTATTTATTTACGCTGGCTTTTGCGGTGATGGC	chr6R	618091721					0.04460035	0.016533201
GYD	100042923|F|0--46:A>G	TGCAGCAGCAGTAGTCCATGATGCGTGCAGCAGGCCATCGAGCTCGAGCACAGGCCACAGCGAGCCAGA	chr6R	618091724			0.0475565	0.0376361
GYD	100035294|F|0--65:A>T	TGCAGTCACTACGTGACACCACGGCAGCAAACACTGTGGCAGTCAATCCATGCAGCCCCTCATCTAGCG	chr6R	619189479			0.0249354	0.0418839	0.039361755	0.116771898
GYD	3578151|F|0--44:G>A	TGCAGCGGAGCGGCGAATCTGCGGCCCGCAGGGCTCACGTGAGGGCGCACGAGGAGAGGCGCCCGCTCG	chr6R	619787554					0.044165858	0.042170688
GYD	3899370|F|0--8:C>T	TGCAGCTTCGAGCGTAGCGAGCAGTTCCACAAGAGACTGTCCTGCGTGCTCATTCCAGGTGCCATAGCA	chr6R	621412285					0.047486813	0.082605316
GYD	3902075|F|0--58:A>T	TGCAGCCGTGCTCCGACCCCCTTTCATCAGCGCCCAAATCCCCACCAATCCCCCTCCAATTTCATTCCA	chr6R	621414002					0.048924551	0.049546957
GYD	3882579|F|0--34:C>T	TGCAGGGAGGAGAGCATGAAGTTGAAGGCGGAGACGGGCGGCGCCACGCCGCGCCTGCGCGTCGCGGCG	chr6R	622737133	SECCE6Rv1G0413240.1	Pentatricopeptide repeat-containing protein			0.042787218	0.047114355
GYD	100012637|F|0--20:T>C	TGCAGATTAACCTTGCTTGTTTGTGAAGTTCCTGAGAAAGAGCATGGAGAGACAGAGGAGGGAACAAGA	chr6R	625235777	SECCE6Rv1G0413620.1	Protein EFR3-like protein	0.0279626	0.0557692
GYD	100019297|F|0--48:C>T	TGCAGGACGATGAAGCATTAAATTATGCGAATAGCAAACTTGTGATCTCAATTGCTACTACGACCAAGA	chr6R	629197151			0.035067	0.0602968
GYD	100027670|F|0--30:T>G	TGCAGCAATCATGAGACCAAACCGTCCATGTATGCTGTCGACCTCACCTCAATTGGGGACGTACACTGA	chr6R	630856075			0.033587	0.0293906	0.024643012	0.040646859
GYD	100075651|F|0--38:T>A	TGCAGAGGGTAAGTGTTTAGCCAGGCACGAATGCCATCTGGCAAATGGACAAGCATCATGTCGTGCACG	chr6R	632031560					0.024643012	0.099865162
GYD	100007343|F|0--63:A>C	TGCAGCCAAGGCCGCAGTCATCGCCATTGGTGAAGAGATAGCAACATATGGACTTCCATCTGGAATTTG	chr6R	635703022	SECCE6Rv1G0414680.1	Lysine ketoglutarate reductase/saccharopine dehydrogenase	0.0355033	0.0228949
GYD	100016373|F|0--7:C>A	TGCAGTCCATGTCATTAAACATTCTGAATCTTAAAATGTTAGTCACACCACAGAGAAATTGACATCCCT	chr6R	642505299			0.049839	0.0518937
GYD	100069149|F|0--42:G>C	TGCAGCCGTTGGACGCACGTAAGAGGCTGCACTCTGTTGCGTGGCATTGGTCGCTCGCTGTCAACCGAG	chr6R	644889789					0.046010958	0.042473508
GYD	100043171|F|0--55:C>G	TGCAGAGCATGGAGGAGCCGTCCATGGCCGACCCGCCGCGGATCTTCTGGAAGTCCAGGAGGAGGCCGT	chr6R	646664474	SECCE6Rv1G0416090.1	Snf1-related kinase interactor 1, putative	0.0434121	0.0362796	0.047637889	0.044215996
GYD	100034918|F|0--56:A>G	TGCAGATGGGATTTACCAGCGGAAAGTTTTTACGAGCTTTCTGTACGTGTGGGACAAGCGAGATAAAAG	chr6R	647527595			0.0473913	0.0406579
GYD	5034738|F|0--19:C>G	TGCAGAATCCAGCATAACACATTCAGCGCCGGCCATAACTGAACACAAAATACTGCACGGCACGGACAT	chr6R	654501543					0.037234731	0.053177861
GYD	100029482|F|0--61:A>C	TGCAGCGCTCGAGCTTGGCGCACTCCCGCCTGCTCTGCGGGATGCGCAGGAGGCTCATGCCAACGGCGA	chr6R	659670524	SECCE6Rv1G0417870.1	Methionine aminopeptidase 2			0.044234458	0.043085991
GYD	100029102|F|0--36:G>C	TGCAGTGGCCGACGGGCTGCGGGGCCGTGCTGCTGTGCTCAGAGATGGGAGGCCCCGTTCTAAAGGCGC	chr6R	659833091	SECCE6Rv1G0417870.1	Methionine aminopeptidase 2			0.0440894	0.043497724
GYD	100058031|F|0--56:A>C	TGCAGCGGCAGTTCGAGTCGAATCGCTCCTCCTCCTTCGTATTCGTCGTCAGGCAGAGCAACAAAGAAG	chr6R	660360162			0.0494115	0.0334258
GYD	100030513|F|0--40:G>C	TGCAGCAACGTGGACGCTCCTCTTTGTCTCGCTTGTCGAAGCAGCAGAGCCCTTGACCACATTGACGAC	chr6R	660793340	SECCE6Rv1G0418050.1	Signal transduction histidine-protein kinase ArlS			0.039369978	0.036811185
GYD	100028645|F|0--51:A>G	TGCAGATGCTAATTGACTTGATTGTATTCGCGATTGCAGAAACCAAGCGATAATTTGGTCAAGGGTTCT	chr6R	661024995					0.035144443	0.088433904
GYD	100011051|F|0--68:C>G	TGCAGCCCTGCTCCCGCAACTTGGGCACACAATCCGCCGTCATCGCTTGGACGTCGATCGCCACTATTC	chr6R	666845639			0.035067	0.021544
GYD	100056284|F|0--59:G>C	TGCAGCTGGGGCGCCGTCTTCTTCCCCAAGCACTGGCGCGAGTTCTACGCCTACATGGCGGCGCGCTTC	chr6R	673004900	SECCE6Rv1G0419790.1	Glycosyl transferase, family 2	0.0215265	0.0955431
GYD	100157047|F|0--26:C>G	TGCAGCATGGGGCCCATGGTCATGGACGGCACCACCACCACCAGCTCCAGCCCCCTCTTGGCCGCCTCC	chr6R	680482201	SECCE6Rv1G0420850.1	Cinnamoyl CoA reductase			0.040264172	0.06867803
GYD	3348315|F|0--40:G>A	TGCAGGCCGAGTCAGCCTGGGATTCAATTGCTTTATATATGTCCTACCTACGGAAACTAGTTTGAAGAT	chr6R	682001480					0.047777123	0.0677141
GYD	5214572|F|0--7:C>T	TGCAGCTCGCCAACGTGAAGACGGCGCTGGGGAGGCGGGAGGAGGCGCTCGCCGACCTGCGCGCCAGCG	chr6R	695997636	SECCE6Rv1G0423410.1	Protein KINESIN LIGHT CHAIN-RELATED 3			0.033839382	0.100827308
GYD	5044101|F|0--46:C>G	TGCAGCGCCGCATCCTTCTGGCCGTCGTGCTCGCCTCACCGTCGGTCCGGCCGGGCTGCCTCGCCGCCG	chr6R	696544265					0.041827315	0.046437083
GYD	5224459|F|0--67:G>A	TGCAGGGGCCGTGGAGGGAGCCGAACCTCGACGGCGGGCGCCATGAACGCGAGGGGGTAAGCTTGCCGT	chr6R	696551270					0.04117572	0.041184236
GYD	3582302|F|0--59:G>C	TGCAGGAACTTCTGCGTGGGGAAGGTGAGCGCGAGCGAGAACATCTGCGGGAGGATGCGGAGCGTGAAG	chr6R	697233322	SECCE6Rv1G0423710.1	Protein DETOXIFICATION			0.038878943	0.04690599
GYD	3596342|F|0--20:C>G	TGCAGTCCCTCCTCATCGGCCTGCTGGCCATGGCGCTCATCCTGGCCTACCGCAACAGCTTCGCGGCGC	chr6R	697233814	SECCE6Rv1G0423710.1	Protein DETOXIFICATION			0.032007565	0.069200712
GYD	100076476|F|0--27:A>T	TGCAGCGGTTATTTTCGATAAGCATCGAGATGCACAGCCTGCCGCCTCCAAGGTACGCAAGCTCGGTGC	chr6R	699759377			0.0479394	0.0208442
GYD	100068339|F|0--35:A>G	TGCAGCTTCTCGAACACCCGCGCGCCGCCCTCGTCACCGATGCCGAAGCTGGCCCTGGCGATGATCTCC	chr6R	700849188	SECCE6Rv1G0424480.1	Cytochrome P450	0.0456338	0.0338135
GYD	3364727|F|0--11:G>T	TGCAGGTGACGGATGCGGGAGAAGAGTTGATTTCCTTGTGCAATCGGAGAAGAGTCTGTCTATTGACAA	chr6R	706075333					0.04289347	0.043587104
GYD	3348176|F|0--63:T>A	TGCAGATGCCATCAAGCACACAATTAACTAACCCACCAGGCCTAGCTCCAGCTCGTGACAATGTTTTTT	chr6R	712377843					0.04890562	0.048093578
GYD	100031548|F|0--42:G>A	TGCAGGTACAACCTAAAGAACGACAAAAGAGAGACGATATCTGAAGCCGATGAGTTTGTGAAGCAGGAC	chr6R	712521450	SECCE6Rv1G0426290.1	F-box domain containing protein, expressed			0.04479896	0.147638105
GYD	100025507|F|0--60:A>C	TGCAGCAGTATAACTGGTCGTGTGGAGACTTCTCCTTGTAACCTTTATCAGGTTCTCTCCAATTCAGAA	chr6R	714126217			0.0304162	0.0457589
GYD	100021786|F|0--58:A>G	TGCAGCTCATGTGTGGATACAGAGAACTTGGCTGTTAGAAGCATCACCACACTCATAAACAGCCCTGGT	chr6R	719474773			0.0354014	0.0560347
GYD	100058446|F|0--36:T>G	TGCAGGGGAAAGGGTTCACTGACGGTGGAGCGCGTGTTGCCGGCGCCGAAGCCGTTCAAGCTGTGCTAC	chr6R	720649878	SECCE6Rv1G0427760.1	Basic 7S globulin 2	0.0327567	0.0308955
GYD	3348562|F|0--26:T>C	TGCAGCACCAAACACACACACACGAGTAGAGAGAACTCTGGTCAGAATTGATTGGGATTATCACACATA	chr6R	721504674					0.034670668	0.116127078
GYD	3909305|F|0--9:G>A	TGCAGCACTGGGTCAACCCTCACTTGAATATGTTTGGTAGTCTCCAGGCGACAGTACAGTAGTACACAC	chr6R	721541486					0.012454169	0.148170184
GYD	100012566|F|0--50:T>C	TGCAGCTGATTGTTCCGCGATGCCTCATAATCCAAGCAGCAAAGTACATGTCCAAATCCTCGTGATTGG	chr6R	722498451			0.0340684	0.0331456	0.032333467	0.030861035
GYD	5209105|F|0--54:T>C	TGCAGCACAGACAAGTGGCCCGCGTCGCAGTTGTACAGTCTGAGGTACTCGAGCTGCTTGCATGCTCAG	chr6R	723502642					0.018443861	0.089501693
GYD	5216274|F|0--64:T>G	TGCAGGGGACACTGGTGCTGCCAGTGGTGCGACATGTTGAGGACTACGATGCTGCCATGAAGCGTCCGT	chr6R	725192116					0.023581597	0.124573963
GYD	100069008|F|0--64:T>C	TGCAGTGCATGTGCATGGTCCGATGGATGGCGACGGCGGACGCAAACGTGGCGATGGATGGCGTTTCCC	chr6R	725996328					0.035327571	0.027689135
GYD	100077775|F|0--60:A>G	TGCAGCCTTCGGTGACACCCACGGCCCGACGCTTGTCTCCCTGGCCATTCGCTCATCCAAAAAGAGTGC	chr6R	726622176					0.040275208	0.049769902
GYD	3344374|F|0--16:C>G	TGCAGATTCTTACAAACAGCACAAATTCATTGCAACTACACACATAAGTACTAGCTGCCACCAGCCAAG	chr6R	728994731					0.012082784	0.278245913
GYD	3365192|F|0--43:T>G	TGCAGGTCCATCAGATCGTTCTTATTAAAACGTCCATGCCATGTCGACGGGCGAGTAACACATGCTACA	chr6R	729751289					0.035665402	0.144028856
GYD	3736893|F|0--48:G>A	TGCAGATGGTGACAAGCTGATGTGTTGCGGGCTACTGAGGCGAGCGCGGGAGAGATGCCTGTATTGTGT	chr6R	731388761					0.046861216	0.044916301
GYD	100002885|F|0--57:G>A	TGCAGCCAAATACCACGGAGTACCTTAATTCTGAGGGTATATTCGTCATGTACAAGAGCTAGACTCAGA	chr6R	733150283			0.0430204	0.0357267
GYD	100077735|F|0--44:G>A	TGCAGGAGAAGAGACGAGAGGGGGCTGGCGGCGCTAGGGTTTGGGTCCCCTTTTAGGTGAACATAAATG	chr6R	737451860			0.0382503	0.0433475
GYD	100054182|F|0--14:C>T	TGCAGCGCCGATCCCACAAAGCGCGCGACCCCGAAATCGACCGAAACCTAGCCTCGTCGCAACAGTGTA	chr6R	740025176					0.025773635	0.115400178
GYD	100054182|F|0--51:C>A	TGCAGCGCCGATCCCACAAAGCGCGCGACCCCGAAATCGACCGAAACCTAGCCTCGTCGCAACAGTGTA	chr6R	740025176					0.023766555	0.09367039
GYD	100069206|F|0--52:G>A	TGCAGAGCATCTGTGGCCCGCTCTCGACCATTCTCGTCCCCAACCTCCCAGAGCCCCACCTCACGAACA	chr6R	741462719			0.0356826	0.0615509
GYD	3363934|F|0--49:G>A	TGCAGGACTTCTGCGTTGCCGACTACAAATCCCTCGACGGCCGTAAGTTGTACTCTTGTGTGCGCACAT	chr6R	747258150					0.0322936	0.077989181
GYD	100095607|F|0--49:T>C	TGCAGGAGAGGATCAGGGAGAGGGTGAACGTGAGGGAAGGCACCTCCTATATGAGGTCGGCCGTGCGGC	chr6R	754007765	SECCE6Rv1G0432710.1	Non specific phospholipase C			0.038879974	0.041813436
GYD	100017302|F|0--7:A>G	TGCAGCGAACTCTCTTGGAAGTTCCTGGCTAGAAGCCTAGCTAGAAAGAGACGGGCACTAATAATGGTA	chr6R	754720351					0.019843547	0.106571571
GYD	3364272|F|0--50:A>G	TGCAGTGTGGGCGGCCTTGGACCGTCCAATTATTTAGTCTGTAGACGAAGACGAGACAATGCCTTTTCG	chr6R	757525798					0.010981855	0.15531991
GYD	100003922|F|0--30:T>C	TGCAGCATGTCTTCCTCCACCTCCCTACCATGGCAGTCTCCCTCTTCCACCTCCCTCTTCTAACGATCC	chr6R	758957465					0.03135653	0.035762445
GYD	100005511|F|0--14:C>T	TGCAGTTGGGAACACCCAGAGTTGTTCAGAGTCTCTATTGCTCGTCTCTGGTATGCAAACAAGAACCTG	chr6R	759085859					0.036590815	0.021119493
GYD	100016955|F|0--15:G>A	TGCAGTCGAAGCCGCGTCCAAGGTCATTTTTCTACCATCTCACGCGCATCGAGCTTCAGCCTCGTATAA	chr6R	759214451					0.035444055	0.060269272
GYD	3735499|F|0--49:T>C	TGCAGCTCGGCTTCAGGTTCTGCCTGCCATCCATCTGCTCTGCACTGAATGAAGCCAGTGGCCACTAGT	chr6R	759760361					0.018443861	0.131199432
GYD	3363790|F|0--66:A>G	TGCAGGACCCGAGCTCCCGCTTCATGAAAACCGTGAGCATGTGAGGCAAGAGCTTCACTTTGGAAAACA	chr6R	761314303	SECCE6Rv1G0433710.1	Fusion glycoprotein F0			0.01555529	0.091922423
GYD	3350980|F|0--47:G>C	TGCAGAGCTTGAGACTCTCAGATGCAGAAAAGAGGAGCATAAAGATTGGAAGGAAACATGGCTGCTCGC	chr6R	761670868					0.016012695	0.122689032
GYD	100024581|F|0--32:A>G	TGCAGCACTTGGATTTGAGATCCTAGGATGGGAAAGTTGACTTGGGACAGAGGAGAGATGTGCAGGGGC	chr6R	761671052					0.022074797	0.056086591
GYD	5214785|F|0--22:G>A	TGCAGCTGCGCCTTCTTCAGCTGGCGTGGTCTGGCCGCCGCACATCCACCGTGTCCGAGAGGACCGTGC	chr6R	761784180	SECCE6Rv1G0433820.1	TSA: Wollemia nobilis Ref_Wollemi_Transcript_14910_3291 transcribed RNA sequence			0.011838457	0.148741059
GYD	100127134|F|0--35:T>C	TGCAGGTGGCCGGTGACCCGTTGACGGGGACGAATTTGACGACGGCCGTGGTCGACGAATTTGATGCGT	chr6R	762384739					0.039556694	0.055174132
GYD	100060034|F|0--15:T>G	TGCAGGGGTCGATGATGAAGCCGCCCGAGAGGGCGATCCAGGGCAGCGGGCGCGCTTGGGGGCCATGGC	chr6R	762590659					0.048921083	0.085442764
GYD	3597651|F|0--15:G>T	TGCAGGGGTCGATGAGGAAGCCGCCCGAGAGGGCGATCCAGGGCAGCGGGCGCGCTTGGGGGCCATGGC	chr6R	762590659					0.04910153	0.03202012
GYD	100082255|F|0--68:C>T	TGCAGCTTCACCTCAGAGGAGGAGGTGCCCTTGGGACGGGCGGCATTGGTGGTAGGACCAGGAGCTGGC	chr6R	763394196	SECCE6Rv1G0434030.1	bZIP transcription factor, putative (DUF630 and DUF632)	0.0340684	0.0412671
GYD	3742474|F|0--60:C>G	TGCAGGTGGCGAGGATGGGTGGCGCTGCTCCAAGCGACATTTAGCGAGGATGGGTGTCGCCGATCTGTG	chr6R	763743835					0.035648963	0.067186656
GYD	3344847|F|0--27:C>A	TGCAGTCTCTCCAAAGTCCTTCGAGGCCTAGGAGTCCTGGAGGCATTCAGCAAGGAGGCCGACCTGTCC	chr6R	764689140					0.019843547	0.124493457
GYD	100039826|F|0--21:A>G	TGCAGAAGCTCAGCCGCAGCCAATCTACGACATAGATGGTCATGAGCTAACAGGCCACGACATGTACAA	chr6R	764818714	SECCE6Rv1G0434320.1	Kunitz trypsin inhibitor			0.041914272	0.034325827
GYD	5205980|F|0--13:G>A	TGCAGATGGTGACGAGCTGACGTGTTGCGGGCTACTGAGGCGAGCGCGAGAGAGATGCCTGTATTGTGT	chr6R	766942687					0.023938167	0.145739771
GYD	100173875|F|0--57:A>G	TGCAGCGGAGGTGGAGGCGCAGTTGGTCTGGGGAGGGCCCATTGCGTGTCACTGGTTAGTGGGGCCGAG	chr6R	768485388					0.044568481	0.06954095
GYD	100007686|F|0--47:T>C	TGCAGGAGCTAGCTATCATTATTCAGAAGTTCAGAACATATTTTTCATACCTTGTTGTGAAGCACCATG	chr6R	768843293			0.049839	0.0287569
GYD	3362267|F|0--47:C>T	TGCAGGAGCTAGCTATCATTATTCAGAAGTTCAGAACATATTTTTCACACCTTGTTGTGAAGCACCATG	chr6R	768843293					0.011838457	0.181654528
GYD	5040331|F|0--12:A>C	TGCAGCTGGCGGACGTGCTGCACGCCCGTGGCCTCCGCGTCACCGTCTTCCACGCCGCCTTCAACGCGC	chr6R	769357593	SECCE6Rv1G0435040.1	UDP-glycosyltransferase			0.040453109	0.18144033
GYD	100040916|F|0--63:G>T	TGCAGCATGATATTCTCTATCGATCTTATTGGAGTCTATAGGGTAGATCGACGTTGGTTGCATGCATGA	chr6R	772831953					0.031813003	0.040952263
GYD	100077459|F|0--21:C>T	TGCAGCCGCCCACGTCGCCGGCGGGTACGAGAGCTACTGCAAGTGCAACAAGGCGTGCATCGTGGACTG	chr6R	778097745	SECCE6Rv1G0436520.1	Translation initiation factor IF-2			0.025168593	0.170348119
GYD	100020933|F|0--44:G>A	TGCAGGCCGCAGGAAGTCGTGATACTGGTTCTTCAATAACTCGAGAATTCACCGCGAACAAATCTCATC	chr6R	779356084			0.0492958	0.0169216
GYD	100075333|F|0--40:G>A	TGCAGACTGCGACATCATCCCCGCTAGTTATGGCGGCGAGGATACACCTGTTTGAAGTGGGCGGTGAGG	chr6R	780821137					0.0440894	0.066400336
GYD	100139135|F|0--13:C>T	TGCAGGAGCGCGTCGAGGTTCCGAAGAGCGTCTGCGGCAAGCCTACGCCGTCGCTGATTGATTTGGCGA	chr6R	785763455	SECCE6Rv1G0437660.1	Werner Syndrome-like exonuclease			0.022074797	0.083951836
GYD	100084449|F|0--22:G>A	TGCAGGCACTCGAGGGGCCTCTGTTGTCAGAATCGTCGCCACTGGAGAAGATGAGATGGGTGACAAGGG	chr6R	788917511	SECCE6Rv1G0438290.1	28 kDa ribonucleoprotein, chloroplastic	0.0167123	0.0918201
GYD	3885556|F|0--27:A>G	TGCAGGGTGCACCAAACGACGAGGACGACGGAGGATGAGGAGCGTGGGGAGAGCAGCAAGGCCGCCCGA	chr6R	792571942					0.017343136	0.12339895
GYD	3748580|F|0--66:C>G	TGCAGCCGCGACGGCGACGAGCACGACTTCTTCCGCGCCGCGCAGGCCGGCGACGTGGACGCGCTCCAC	chr6R	795629196	SECCE6Rv1G0439220.1	Ankyrin repeat family protein			0.034900561	0.109622773
GYD	4490123|F|0--64:G>C	TGCAGGTGGTACCCCGGCGGGGTCCCGTCCAAGCACACTGCTCCCTTTTCCTGTGCGCCGGCGAGGAGG	chr6R	795818000	SECCE6Rv1G0439290.1	Pectin acetylesterase			0.04890562	0.102373327
GYD	100075576|F|0--13:A>G	TGCAGGAAGTCGTAGTGGATCCTCTTGTGAAGGACGGCGGCCTCCCTCTGGCTCCGCCTTTGATCCTCG	chr6R	799407710	SECCE6Rv1G0439780.1	NADH-quinone oxidoreductase subunit D	0.0454971	0.030761	0.017343136	0.056531883
GYD	3743080|F|0--5:G>A	TGCAGGAAGTCGTAGTGGATCCTCTTGTGAAGGACGGCGGCCTCCCTCTGGCTCCGCCTTTGATCCTCG	chr6R	799407710	SECCE6Rv1G0439780.1	NADH-quinone oxidoreductase subunit D			0.030606976	0.139923674
GYD	100038787|F|0--57:A>G	TGCAGTGGCACGTACAGGTGCTAGTGAGTACGTGCGTATGGCGTGTGGATCCACGATATGAATGATGCT	chr6R	813999610					0.044120363	0.11740803
GYD	5210400|F|0--33:A>G	TGCAGTGGCACGTACAGGTGCTAGTGAGTACGTACGTATGGCGTGTGGATCCACGATGTGAATGATGCT	chr6R	813999610					0.044685142	0.101395913
GYD	100021550|F|0--6:T>C	TGCAGGTGGCCCCAGACGGTACACCTACCACGAGCTGGTTGCCGCAACGAAACACTTCGCGGAAGATGA	chr6R	814660733	SECCE6Rv1G0442280.1	Protein kinase			0.034972003	0.038556004
GYD	100080522|F|0--13:T>C	TGCAGCAGCCAGTTAGGGCCCGAGTTTTTGAGGCTGTTCAGGTCTGGCAGTGGCCATGACTCGCGCATG	chr6R	822647677			0.0304162	0.0305561
GYD	100015661|F|0--16:A>G	TGCAGATCATTGCCCGACACTCCTCCACGCCCAGCTCGTGCGACCCCAGCCTGCTCAGTGTCCGCCTCA	chr6R	827208508	SECCE6Rv1G0444210.1	Calcium-binding protein			0.044841481	0.09103574
GYD	100040624|F|0--54:T>C	TGCAGGAGCTCTCCGTCGTCCGCTGGTACCAAAGGAAGAACCGCATCGACATCGTCGCCCCTGCGCTTA	chr6R	827559116					0.047466386	0.021158207
GYD	100087748|F|0--33:G>A	TGCAGCGATGCCGAGCTGACGCTCAGGTCGCTCGTGTCATGCACAATTCTTCTGAGCTGGAGTGTGCGC	chr6R	827606833	SECCE6Rv1G0444360.1	F-box family protein			0.011870094	0.055635968
GYD	3363592|F|0--56:C>G	TGCAGTCTCAACCACCGTGAACTTGTGATCATAGCCATGCATGCCATGCATGTGACCATGCAGGTGGTT	chr6R	827871323					0.028100521	0.102875316
GYD	3738870|F|0--66:T>G	TGCAGAACAAGACTGCAATTGGCAAAGCAAGCAGAGGCAGGGTAGGTCGGGGAAACTGTCGTGCGGTGG	chr6R	828419664					0.012454169	0.110217493
GYD	100025573|F|0--44:G>A	TGCAGCTGCATCGCCAGCCGCAACGACCTCCCTCGCATGCGACCGCACGGTCTCGGCAGCCAAAGCCGC	chr6R	828854016					0.02657458	0.137872747
GYD	3602335|F|0--45:A>T	TGCAGGAGGCGGTGCGGGACGCGATGCTGCACGACGCGAGGGTCGAGGAGGCGTGGGCGCTGGAGGGGG	chr6R	829960581	SECCE6Rv1G0444630.1	Pentatricopeptide repeat-containing protein, putative			0.026148289	0.139237783
GYD	100013659|F|0--41:A>T	TGCAGATCCATGCCTCCATAGTATGTCTCCTCTCCTGCTCAATTTACTGTGATTGAGTAGCCAGAATTT	chr6R	830382166					0.039361755	0.0379435
GYD	5202549|F|0--20:G>T	TGCAGATCCACCCACGGCCAGTCGTCTAAGATGCAAGCATGGATGGAACCAGGAAGGTCTCGCTCCTTC	chr6R	832303850					0.031738731	0.092726385
GYD	3909048|F|0--41:C>T	TGCAGTTTTTCCAGCAGATTCCTTGTTGCAGAAACTCATCACAGCAGACAGTGAGCACTGAGCAGGGGT	chr6R	836376998					0.0440894	0.063452731
GYD	100008423|F|0--22:T>G	TGCAGCGAGAGTCCCTACCTCATGCTTGCGGGCGTGAGGAAAAAGAGCTTTCGCGACAAAGCTCGATTT	chr6R	841976569			0.0474828	0.0377749
GYD	100025371|F|0--60:C>T	TGCAGGTTGGCGTTGCACCAAGTTGCACATTTTCTTACAAGGCTCGAATACATCATCGATCCATCACTA	chr6R	846467960					0.042787218	0.056876432
GYD	3585578|F|0--35:G>A	TGCAGAAAGATGCTCCATCGACAAACCTCACATGCGTACACGAGGCCGTGGATGGATGCGTGCTGCCTC	chr6R	850262445					0.048924551	0.053772269
GYD	5213705|F|0--59:A>C	TGCAGCTTCAGTCACGGCAGCACGCTGGGCAGGTTATGGGGGGCGCCGTTCAGGAACAGAGGCACCGAG	chr6R	851608330	SECCE6Rv1G0447780.1	Lysine ketoglutarate reductase trans-splicing protein (DUF707)			0.034972003	0.082839215
GYD	100110078|F|0--36:C>T	TGCAGTGCGTAGTATCCAACCAGGGGGATCACGCGACTCACCAGGTAGGCGGATCCACGCAGGGTTGCA	chr6R	853479597					0.027971985	0.097054051
GYD	100174480|F|0--35:G>A	TGCAGTAGGCGTGGTGAGTAGTATCGGTTTATCTAGTTCGGTGTTCTCTTTATTAATTCATTCATATTA	chr6R	856208879					0.036907805	0.079447902
GYD	100061599|F|0--18:T>C	TGCAGAGCGCGACCTCCATAGTGAGCCGCCTCGACCACCCCCATAACAGGCCTGCCTCCCCGCGATGCC	chr6R	868123711	SECCE6Rv1G0450490.1	Membrin	0.0440507	0.0624801
GYD	100072204|F|0--34:G>A	TGCAGTGCACGGCCTGTGGCTGAGTGGGACGTGCGTGGTGATAATAATAGTTTTCTCAATCATAGGACC	chr6R	868680539					0.045803296	0.076214704
GYD	5034741|F|0--32:T>C	TGCAGGAGCAGGTGGCGCGGGAGCAGTAGGGATGGCAGGTGGAGCGGTGGCGAGAGGGACAGCAGCCGA	chr6R	869289333					0.024643012	0.138982893
GYD	100165073|F|0--43:A>G	TGCAGTGGCGTCCCGACTTGTTTCACACCACCGCTGTAAGAAAAAACCACCATGGGTCGAGACAGGCCC	chr6R	869671150	SECCE6Rv1G0450780.1	thymidylate synthase 2			0.047486813	0.07557551
GYD	3747313|F|0--53:C>G	TGCAGTGGAATCCATGCGCGTGACAGGTGGTGATCAAGCTCTCAGTGTCTTGCCGTTCGGTTTGCCGGA	chr6R	872249310	SECCE6Rv1G0451360.1	Kinase family protein			0.02456655	0.160262254
GYD	3907289|F|0--40:C>G	TGCAGTGCTTGTTGCTGCCGTCGCAGTCGACGAGCTGCTGCGGCGACAGCGGGATCAGCTCCCCGTGCT	chr6R	872519554					0.044331973	0.066621539
GYD	100002862|F|0--37:T>G	TGCAGGTGAAAGAAAAAAAGAACACCTAAAGTATACATCGTGTTGTGGAAACAAGAGCGATCAGGACCC	chr7R	2125259			0.041113	0.0224905
GYD	100020412|F|0--37:A>G	TGCAGCGTTAAATTGTCGCCATCGATATATATGACTCATCTGAGATCTGACATGTACTCCTACCATTCA	chr7R	2336579					0.043414703	0.023772748
GYD	100017175|F|0--59:C>G	TGCAGCTCTTGCTGCACCTCATCAACCCTAAAATCAACCAAATCCATCACCAAAGTGAACAAGCAACAA	chr7R	3407460					0.042473865	0.025578736
GYD	3364522|F|0--59:G>C	TGCAGCGTACGATCGACGTGATCGACGTCCGTTCGCCCGTCGATTTCCATGGCTGACATGTGCATGTGC	chr7R	6193449					0.044331973	0.093412545
GYD	5219663|F|0--22:C>T	TGCAGCGTCCTGCAAGTACATTCCATCCCGCCATGATCGACCTCCACCGTCAGTACCATGTCAGCGAGC	chr7R	8208172					0.048712385	0.081915451
GYD	3596174|F|0--61:T>C	TGCAGGGACTTGAGATCAATCTCATAGAGGACAAAAGGAGAGCTATTTGCGACGATGAAAATGATGTCA	chr7R	9013292					0.040264172	0.091849226
GYD	5046764|F|0--53:C>T	TGCAGATGAAGTAGTTTGTGCCGCGGGCGAGCGTGACGCGGTCGGCGCCGGAGCTGTAGACCTTGCCTC	chr7R	10993380	SECCE7Rv1G0456520.1	Basic blue protein, putative			0.045449789	0.045875738
GYD	100004250|F|0--65:G>C	TGCAGACCAGCTTCGCCGCGTACACAACGTTGTTGGGAAAACTCAGGTCTCCCTCCCTATCCATCGTTT	chr7R	11393428	SECCE7Rv1G0456720.1	Sucrose transporter	0.0426057	0.031267
GYD	100004250|F|0--66:T>C	TGCAGACCAGCTTCGCCGCGTACACAACGTTGTTGGGAAAACTCAGGTCTCCCTCCCTATCCATCGTTT	chr7R	11393428	SECCE7Rv1G0456720.1	Sucrose transporter	0.0492557	0.0184876
GYD	100008832|F|0--13:G>A	TGCAGAAATATAAGTTAAACAAGCTTGGGCGACTATGCAAATTACATCCAGAACACTTGAGCATCAAAA	chr7R	11416171			0.0409358	0.0320825
GYD	3360514|F|0--20:G>C	TGCAGTATCTCTTGTGAGCTGTGAAGATGAAGTACATGGGGCGTACCTACCAGTCACTAGATAAAGTAT	chr7R	23479133					0.04117572	0.109631211
GYD	3908499|F|0--33:T>C	TGCAGCTTCTTTGAATTTTCTCACACCTTAGACTTTAGGCTTAGATAGTACAGGCATGTGACCACTGGC	chr7R	23479136					0.02456655	0.117666121
GYD	100004007|F|0--39:C>T	TGCAGTTTCATCAACTAACATCTGCTCTAGGTCAATTCGCATGGTACTAGCTTTGTGTTCCATTTGCGG	chr7R	23723852	SECCE7Rv1G0458970.1	lectin-receptor kinase	0.0456331	0.0320274
GYD	3744254|F|0--60:A>G	TGCAGGCAGAAAAAAGAGGAAGGATGCATGAGGGAGGCAACAAATGTGAACAGGAGGGAGAGAGAGAGA	chr7R	26115096					0.04289347	0.076090894
GYD	100110071|F|0--15:G>A	TGCAGTGCGCGGACGGCCGCCATGGGCTCGCGGCGGAGGAGTCGGGGGAGGAGGCGGCGCAGGCCGTTC	chr7R	31517391					0.0440894	0.075269271
GYD	100049385|F|0--26:C>T	TGCAGCCCTACTTGTTCGATGACGAGCATATGCTGTGGCCAAACTGGGTAATTGATTGATATCAATTCT	chr7R	31964386			0.0349731	0.048077
GYD	3731750|F|0--10:C>T	TGCAGTGCTGCTCCTGCTCCATATATCTCATGCATCATTCATAACGGAGCATTGGATAATGACAATTGC	chr7R	36640345					0.024406046	0.089937886
[truncated: 230 more rows]

## Sheet: suppltable4 TGW
Trait	DArTseqTM SNP ID	Sequence 5'>3'	Lo7 pseudomolecule	Position (bp)	Lo7 cds	Description	Padj 2011	R2 2011	Padj 2012	R2 2012
[truncated: 1,858 more rows]

[truncated: 6 more sheets: suppltable4 HDT, suppltable4 TIN, suppltable4 GPC, suppltable4 STC, suppltable4 TAX, suppltable4 WAX]
