# Supplementary material for: A Genome-Wide Association Study Pinpoints Quantitative Trait Genes for Plant Height, Heading Date, Grain Quality, and Yield in Rye (Secale cereale L.)
Source: Front Plant Sci. 2021 Oct 29;12:718081. doi: 10.3389/fpls.2021.718081 (PMC8586073; doi:10.3389/fpls.2021.718081)
Supplement: Supplementary file 5 [file Table_5.XLSX]

## Sheet: suppltable5 PHT
Trait	DArTseqTM SNP ID	Lo7 pseudomolecule	Position (bp)	Lo7 cds	description	Padj 2011	R2 2011	Padj 2012	R2 2012	Rice locus ID	Rice gene	gene symbol	Trait function	Trait	Objective	doi													chromosome	tblQTARO_170210_start	tblQTARO_170210_end	locus_id	alias	Genebank Acc	isolation
PHT	100004850|F|0--10:G>T	chr1R	43827422	SECCE1Rv1G0008040.1	Protein aluminum sensitive 3	0.006735493	0.043184736			OS05G0119000	sensitive to Al rhizotoxicity2	STAR2	Resistance or Tolerance	Other soil stress tolerance	Aluminium tolerance.	10.1105/tpc.108.064543
PHT	100023588|F|0--34:T>C	chr2R	702878016	SECCE2Rv1G0111710.1	Lectin receptor kinase	0.025715283	0.039118454	0.027867498	0.047192201	OS04G0531400	Salt Intolerance 2	SIT2	Resistance or Tolerance	Salinity tolerance	salinity tolerance	10.1105/tpc.114.125187
PHT	100082729|F|0--52:C>G	chr2R	766439976	SECCE2Rv1G0116650.1	Glycosyltransferase	0.005777256	0.081197477			OS04G0556500	cZ-O-glucosyltransferase 1	cZOGT1	Morphological	Dwarf	Dwarfism. Leaf senescence. Crown root.	10.1104/pp.112.196733
PHT	100065199|F|0--7:A>G	chr2R	889120216	SECCE2Rv1G0132320.1	transcription factor-like protein	0.016976318	0.067116909			OS04G0637000	-	ostgap1	Resistance or Tolerance	Other stress resistance	Regulation of production of phytoalexins and allelochemicals.	10.1074/jbc.M109.036871
PHT	100045972|F|0--25:C>G	chr4R	27705186	SECCE4Rv1G0219050.1	GAI-like protein 1	0.041671813	0.017560549			OS03G0707600	slender rice1	slr1	Morphological	Dwarf	Cell division and expansion. Gibberellin sensitivity.	10.1105/tpc.13.5.999
PHT	5037677|F|0--11:C>A	chr4R	56293951	SECCE4Rv1G0222350.1	Kinase PfkB			0.043759819	0.066207558	OS03G0737701	low phytic acid N15-186	lpaN15-186	Physiological	Eating quality	Seed phytic acid content.	10.1007/s00122-008-0863-7
PHT	100025609|F|0--55:A>G	chr4R	759417141	SECCE4Rv1G0271100.1	ATP-dependent DNA helicase DDM1	0.018002177	0.069475418			OS03G0722400	Oryza sativa Decrease in DNA Methylation b	OsDDM1b	Morphological	Dwarf	Dwarfism, DNA methylation	10.1007/s00438-012-0717-5
PHT	100044467|F|0--5:A>G	chr5R	404309991	SECCE5Rv1G0321480.1	FCA protein			0.041286533	0.06648561	OS09G0123200	-	rFCA	Physiological	Flowering	Flowering time.	10.1007/s10540-007-9047-y
PHT	100073954|F|0--8:G>C	chr5R	802403401	SECCE5Rv1G0364630.1	Chalcone-flavonone isomerase family protein	0.047187023	0.028670896			OS03G0819600	gold hull and internode 1	gh1	Morphological	Seed	Flavonoid content. Seed color. Internode color.	10.1007/s00425-012-1598-x
PHT	3344181|F|0--28:T>C	chr5R	873940820	SECCE5Rv1G0376800.1	Chaperone DnaK			0.044091456	0.048514146	OS02G0774300	mitochondrial heat shock protein 70	mtHsp70	Resistance or Tolerance	Other stress resistance	Heat and redox induced programmed cell death in protoplast.	10.1016/j.febslet.2010.11.051
PHT	100080151|F|0--58:C>G	chr6R	696431303	SECCE6Rv1G0423520.1	LOB domain protein-like			0.022787324	0.1170474	OS02G0820500	degenerated hull 1	dh1	Morphological	Panicle flower	Glume formation.	10.1007/s11103-007-9283-3
PHT	100037407|F|0--10:G>C	chr7R	45292948	SECCE7Rv1G0462370.1	Phosphate transporter protein	0.036045946	0.056750279			OS10G0444700	phosphate transporter8	OsPT8	Resistance or Tolerance	Other soil stress tolerance	Phosphate uptake.	10.1104/pp.111.175240
PHT	100040874|F|0--8:A>C	chr7R	90886165	SECCE7Rv1G0467760.1	Fatty acyl-CoA reductase	0.03789411	0.05561333			OS03G0167600	defective pollen wall	dpw	Physiological	Sterility	Pollen wall development.	10.1105/tpc.111.087528
PHT	100056355|F|0--9:A>G	chr7R	259418004	SECCE7Rv1G0479810.1	Ethylene-overproduction protein 1	0.047923933	0.014683586			OS03G0294700	ETHYLENE OVERPRODUCER 1-like	OsETOL1	Resistance or Tolerance	Drought tolerance	negative role in drought tolerance at the reproductive stage	10.1111/tpj.12508
PHT	100025616|F|0--20:C>T	chrUn	16468347	SECCEUnv1G0531210.1	Phototropic-responsive NPH3 family protein			0.045765318	0.059852997	OS02G0568200	Coleoptile phototropism 1	cpt1	Morphological	Root	Root and seedling phototropism. Auxin translocation.	10.1105/tpc.104.028357

## Sheet: suppltable5 GYD
Trait	DArTseqTM SNP ID	Lo7 pseudomolecule	Position (bp)	Lo7 cds	description	Padj 2011	R2 2011	Padj 2012	R2 2012	Rice locus ID	Rice gene	gene symbol	Trait function	Trait	Objective	doi													chromosome	tblQTARO_170210_start	tblQTARO_170210_end	locus_id	alias	Genebank Acc	isolation
GYD	100004850|F|0--10:G>T	chr1R	43827422	SECCE1Rv1G0008040.1	Protein aluminum sensitive 3			0.034670668	0.021478189	OS05G0119000	sensitive to Al rhizotoxicity2	STAR2	Resistance or Tolerance	Other soil stress tolerance	Aluminium tolerance.	10.1105/tpc.108.064543													5	967668	969310	Os05g0119000		-	Knockdown
GYD	100043599|F|0--28:A>G	chr1R	579388632	SECCE1Rv1G0042330.1	Zinc transporter	0.0488362	0.0241172			OS05G0472700	-	oszip5	Resistance or Tolerance	Other soil stress tolerance	Zn sensitivity.	10.1007/s11103-010-9637-0													5	23262252	23264744	Os05g0472700		-	Mutant
GYD	3363247|F|0--5:T>C	chr2R	97511412	SECCE2Rv1G0077160.1	Magnesium-chelatase subunit H			0.047486813	0.034504065	OS03G0323200	-	OschlH	Physiological	Source activity	Chlorophyll development.	10.1093/pcp/pcg064													3	11762832	11770250	Os03g0323200		-	Mutant
GYD	100057885|F|0--13:T>C	chr2R	624485190	SECCE2Rv1G0105720.1	ABC transporter ATP-binding protein	0.0349731	0.0507463			OS04G0459000	ATP Binding cassette B subgroup member 14	OsABCB14	Physiological	Root	auxin influx transporter involved in Fe homeostasis,	10.1111/tpj.12544													4	23319542	23313303	Os04g0459000		-	Knockdown
GYD	100077389|F|0--66:G>C	chr2R	889120267	SECCE2Rv1G0132320.1	transcription factor-like protein	0.0393912	0.0330395			OS04G0637000	-	ostgap1	Resistance or Tolerance	Other stress resistance	Regulation of production of phytoalexins and allelochemicals.	10.1074/jbc.M109.036871													4	32801894	32810598	Os04g0637000		-	Overexpression
GYD	3897575|F|0--11:C>A	chr2R	929825191	SECCE2Rv1G0140000.1	Glutathione-regulated potassium-efflux system protein			0.039705471	0.052880936	OS04G0682800	Albino midrib 1	AM1	Resistance or Tolerance	Drought tolerance	stomatal closure conferring the drought tolerance	10.1007/s00299-014-1639-y													4	35269455	35264814	Os04g0682800		-	Mutant
GYD	100026964|F|0--11:C>A	chr3R	652963398	SECCE3Rv1G0183650.1	Wuschel homeobox protein	0.041628	0.0413992	0.046425801	0.040183322	OS01G0667400	DWARF TILLER1	DWT1	Morphological	Panicle flower	panicle size, the number of spikelets	10.1371/journal.pgen.1004154													1	29047653	29046116	Os01g0667400		-	Mutant
GYD	100084896|F|0--30:G>A	chr3R	652963741	SECCE3Rv1G0183650.1	Wuschel homeobox protein			0.042473865	0.120814863	OS01G0667400	DWARF TILLER1	DWT1	Morphological	Panicle flower	panicle size, the number of spikelets	10.1371/journal.pgen.1004154													1	29047653	29046116	Os01g0667400		-	Mutant
GYD	100100472|F|0--32:T>C	chr3R	867211893	SECCE3Rv1G0201750.1	Amino acid permease			0.01358027	0.087324459	OS01G0878700	amino acid permease	OsAAP6	Physiological	Eating quality	starch and storage protein biosynthesis in developing rice grain	10.1038/ncomms5847													1	39893617	39889322	Os01g0878700		-	Knockdown Overexpression
GYD	100067643|F|0--10:C>G	chr4R	608345122	SECCE4Rv1G0251840.1	Starch synthase, chloroplastic/amyloplastic			0.044051003	0.067077451	OS06G0229800	Soluble starch synthase IIa	SSIIa	Physiological	Eating quality	Chalky kernel. Amylose content.	10.1139/g11-010													6	6747359	6752337	Os06g0229800		-	Knockdown
GYD	100036062|F|0--17:C>T	chr5R	16279244	SECCE5Rv1G0299380.1	YABBY transcription factor	0.0440507	0.0696785			OS07G0160100	YABBY 1	YAB1	Morphological	Dwarf	Dwarfism. Regulation of gibberellin level.	10.1104/pp.107.096586													7	3252075	3261389	Os07g0160100		-	Overexpression
GYD	100043294|F|0--46:C>A	chr5R	512843613	SECCE5Rv1G0329150.1	Cellulose synthase			0.044841481	0.032718046	OS09G0422500	brittle culm 6	bc6	Morphological	Dwarf	Brittle culm. cellulose synthesis in secondary cell walls.	10.1093/jxb/erq395													9	15935031	15939604	Os09g0422500		-	Mutant
GYD	3600749|F|0--19:C>T	chr5R	528874663	SECCE5Rv1G0330420.1	PHD finger protein			0.044841481	0.060444035	OS09G0449000	thermo-sensitive genic male sterility 9-1	TMS 9-1(OsMS1)	Physiological	Sterility	pollen fertility	10.1007/s00122-014-2289-8													9	17442030	17442369	Os09g0449000		-	Natural variation
GYD	100012252|F|0--54:C>T	chr6R	451187432	SECCE6Rv1G0400400.1	Yellow stripe 1A transporter			0.042198831	0.095957766	OS02G0649900	yellow stripe 1 like 2	OsYSL2	Resistance or Tolerance	Other soil stress tolerance	Fe and Mn translocation from root to shoot and endosperm.	10.1111/j.1365-313X.2010.04158.x													2	27058478	27061460	Os02g0649900		-	Knockdown Overexpression
GYD	100028664|F|0--54:C>T	chr6R	559225146	SECCE6Rv1G0407580.1	CONSTANS-like zinc finger protein			0.017343136	0.066828903	OS02G0724000	Days to heading on chromosome 2	DTH2	Physiological	Flowering	Flowering time under long day condition. Seed maturity.	10.1073/pnas.1213962110													2	30981132	30986033	Os02g0724000		-	Natural variation
GYD	100040874|F|0--8:A>C	chr7R	90886165	SECCE7Rv1G0467760.1	Fatty acyl-CoA reductase	0.0273786	0.0960021			OS03G0167600	defective pollen wall	dpw	Physiological	Sterility	Pollen wall development.	10.1105/tpc.111.087528													3	3632045	3635508	Os03g0167600		-	Mutant
GYD	3595934|F|0--28:C>T	chr7R	877656589	SECCE7Rv1G0522470.1	Cytochrome P450 family protein			0.024643012	0.142886041	OS04G0101400	cytochrome P450 93G1	CYP93G1	Physiological	Others	biosynthesis of different tricin O-conjugated derivatives	10.1104/pp.114.239723													4	92168	90335	Os04g0101400		-	Knockdown
GYD	4486186|F|0--13:A>G	chr7R	877656805	SECCE7Rv1G0522470.1	Cytochrome P450 family protein			0.021239808	0.153498051	OS04G0101400	cytochrome P450 93G1	CYP93G1	Physiological	Others	biosynthesis of different tricin O-conjugated derivatives	10.1104/pp.114.239723													4	92168	90335	Os04g0101400		-	Knockdown
GYD	3357556|F|0--20:C>G	chr7R	877844253	SECCE7Rv1G0522500.1	Zinc finger (C3HC4-type RING finger) family protein			0.011838457	0.148643739	OS04G0101800	soil-surface rooting 1	SOR1	Morphological	Root	Root growth angle.	10.1186/1939-8433-6-30													4	112189	115776	Os04g0101800		-	Mutant
	3352208|F|0--9:G>A			SECCE5Rv1G0352150.1	Zinc-transporting ATPase			0.04227573	0.043145093	OS07G0232900	-	OsHMA3	Resistance or Tolerance	Other soil stress tolerance	Cadmium accumulation. Translocation of Cd from root to shoot.	10.1073/pnas.1005396107													7	7437901	7441709	Os07g0232900		-	Natural variation
	3352208|F|0--9:G>A			SECCE5Rv1G0352150.1	Zinc-transporting ATPase			0.04227573	0.043145093	OS07G0232900	-	qCDT7	Resistance or Tolerance	Other soil stress tolerance	Cadmium accumulation. Translocation of Cd from root to shoot.	10.1111/j.1469-8137.2010.03459.x													7	7437901	7441709	Os07g0232900		-	Natural variation
	3737350|F|0--43:C>A			SECCE1Rv1G0063650.1	UDP-glucose-4-epimerase			0.018984976	0.110070684	OS05G0595100	rice Uridine 5`-diphospho-glucose 4-epimerase1	OsUGE1	Physiological	Culm leaf	cell wall polysaccharide biosynthesis under N-limiting condition	10.1371/journal.pone.0096158													5	29713562	29717054	Os05g0595100		-	Overexpression
	3737350|F|0--43:C>A			SECCE1Rv1G0063650.1	UDP-glucose-4-epimerase			0.018984976	0.110070684	OS05G0595100	rice Uridine 5`-diphospho-glucose 4-epimerase1	OsUGE1	Physiological	Source activity	sucrose biosynthesis during growth under N-limitation conditions (higher sucrose, lower glucose contents)	10.1371/journal.pone.0096158													5	29713562	29717054	Os05g0595100		-	Overexpression
	3891648|F|0--41:G>C			SECCE2Rv1G0131590.1	Transcription factor protein			0.041606612	0.060622436	OS04G0641700	increased leaf inclination1	ili1	Morphological	Dwarf	Leaf angle. Cell length. Brassinosteroid sensitivity.	10.1105/tpc.109.070441													4	33056296	33056710	Os04g0641700		-	Mutant

## Sheet: suppltable5 TGW
Trait	DArTseqTM SNP ID	Lo7 pseudomolecule	Position (bp)	Lo7 cds	description	Padj 2011	R2 2011	Padj 2012	R2 2012	Rice locus ID	Rice gene	gene symbol	Trait function	Trait	Objective	doi													chromosome	tblQTARO_170210_start	tblQTARO_170210_end	locus_id	alias	Genebank Acc	isolation
TGW	100031266|F|0--5:C>T	chr2R	97511412	SECCE2Rv1G0077160.1	Magnesium-chelatase subunit H	0.036504442	0.023271557			OS03G0323200	-	OschlH	Physiological	Source activity	Chlorophyll development.	10.1093/pcp/pcg064
TGW	100075237|F|0--44:T>C	chr2R	678777178	SECCE2Rv1G0109590.1	Endoglucanase	0.009113642	0.053618629			OS04G0497200	endo-1,4-b-D-glucanase 3	OsGLU3	Morphological	Root	Root cell elongation and division.	10.1093/mp/ssr084
TGW	100040117|F|0--38:G>A	chr3R	153236698	SECCE3Rv1G0163840.1	Protein gamma response 1			0.010336542	0.048817412	OS06G0613400	Oryza sativa completion of meiosis I	OsCOM1	Physiological	Sterility	Synaptonemal complex formation. Homologous pairing.	10.1111/j.1365-313X.2012.05025.x
TGW	100082916|F|0--44:G>A	chr3R	818346472	SECCE3Rv1G0197430.1	Zinc finger protein, putative	0.049539697	0.017254946	0.029442099	0.022912326	OS01G0839100	zinc finger protein179	ZFP179	Resistance or Tolerance	Other soil stress tolerance	Salinity and oxidative stress tolerance.	10.1093/jxb/erq120
TGW	100159403|F|0--43:C>G	chr3R	857603626	SECCE3Rv1G0200810.1	Chlorophyll a-b binding protein, chloroplastic			0.004463515	0.168434991	OS01G0869800	Nonphotochemical quenching	qNPQ1-2	Physiological	Source activity	Nonphotochemical quenching capacity. Protection from photoinhibition.	10.1073/pnas.1104809108
TGW	5037677|F|0--11:C>A	chr4R	56293951	SECCE4Rv1G0222350.1	Kinase PfkB			0.02112759	0.098095978	OS03G0737701	low phytic acid N15-186	lpaN15-186	Physiological	Eating quality	Seed phytic acid content.	10.1007/s00122-008-0863-7
TGW	5040976|F|0--5:C>T	chr4R	823067166	SECCE4Rv1G0280740.1	Cytochrome P450			0.040098259	0.074930738	OS06G0110000	reduced pollen elongation1	rpe1	Physiological	Sterility	Pollen tube elongation. Gibberellin biosynthesis.	10.1105/tpc.107.054759
TGW	5040976|F|0--5:C>T	chr4R	823067166	SECCE4Rv1G0280740.1	Cytochrome P450			0.040098259	0.074930738	OS06G0110000	ent-kaurenoic acid oxidase	oskao	Morphological	Dwarf	Dwarfism. Gibberellin biosynthesis.	10.1104/pp.103.033696
TGW	100076250|F|0--64:C>G	chr7R	59876218	SECCE7Rv1G0464290.1	3-ketoacyl-CoA synthase	0.036504442	0.061985575			OS03G0181500	onion 1	oni1	Morphological	Shoot seedling	Shoot organization.	10.1111/j.1365-313X.2011.04530.x
TGW	100056355|F|0--9:A>G	chr7R	259418004	SECCE7Rv1G0479810.1	Ethylene-overproduction protein 1	0.027948109	0.025691032	0.042371908	0.025656829	OS03G0294700	ETHYLENE OVERPRODUCER 1-like	OsETOL1	Resistance or Tolerance	Drought tolerance	negative role in drought tolerance at the reproductive stage	10.1111/tpj.12508
TGW	100086719|F|0--57:C>T	chr7R	297257898	SECCE7Rv1G0481970.1	MYB transcription factor	0.022927117	0.060314051			OS03G0315400	OsMYB2	OsMYB2	Resistance or Tolerance	Cold tolerance	Cold, drought and salinity tolerance. ABA sensitivity.	10.1093/jxb/err431
TGW	3594468|F|0--23:C>G	chr7R	509179805	SECCE7Rv1G0490840.1	Cellulose synthase-like protein			0.032022363	0.064135845	OS08G0160500	Cellulose synthase-like F 6	cslf6	Resistance or Tolerance	Lodging resistance	Brittle culm. Culm mechanical strength. Culm size. Mixed-linkage glucan content.	10.1104/pp.112.195495
TGW	4486186|F|0--13:A>G	chr7R	877656805	SECCE7Rv1G0522470.1	Cytochrome P450 family protein			0.030663647	0.143137623	OS04G0101400	cytochrome P450 93G1	CYP93G1	Physiological	Others	biosynthesis of different tricin O-conjugated derivatives	10.1104/pp.114.239723
TGW	3357556|F|0--20:C>G	chr7R	877844253	SECCE7Rv1G0522500.1	Zinc finger (C3HC4-type RING finger) family protein			0.021037345	0.105457945	OS04G0101800	soil-surface rooting 1	SOR1	Morphological	Root	Root growth angle.	10.1186/1939-8433-6-30
TGW	100025616|F|0--20:C>T	chrUn	16468347	SECCEUnv1G0531210.1	Phototropic-responsive NPH3 family protein			0.020852309	0.110587065	OS02G0568200	Coleoptile phototropism 1	cpt1	Morphological	Shoot seedling	Root and seedling phototropism. Auxin translocation.	10.1105/tpc.104.028357

## Sheet: suppltable5 HDT
Trait	DArTseqTM SNP ID	Lo7 pseudomolecule	Position (bp)	Lo7 cds	description	Padj 2011	R2 2011	Padj 2012	R2 2012	Rice locus ID	Rice gene	gene symbol	Trait function	Trait	Objective	doi													chromosome	tblQTARO_170210_start	tblQTARO_170210_end	locus_id	alias	Genebank Acc	isolation
HDT	100004850|F|0--10:G>T	chr1R	43827422	SECCE1Rv1G0008040.1	Protein aluminum sensitive 3	0.033801477	0.018504219			OS05G0119000	sensitive to Al rhizotoxicity2	STAR2	Resistance or Tolerance	Other soil stress tolerance	Aluminium tolerance.	10.1105/tpc.108.064543
HDT	100031266|F|0--5:C>T	chr2R	97511412	SECCE2Rv1G0077160.1	Magnesium-chelatase subunit H	0.031223005	0.026289222			OS03G0323200	-	OschlH	Physiological	Source activity	Chlorophyll development.	10.1093/pcp/pcg064
HDT	100062573|F|0--28:C>G	chr2R	132751939	SECCE2Rv1G0080750.1	Cellulose synthase-like protein	0.037960001	0.062936613			OS03G0377700	cellulose synthase A5	CESA5	Morphological	Dwarf	O.glaberrima Dwarfism to Rice tungro sperical virus (RTVS) infection	10.3389/fmicb.2014.00026
HDT	100023588|F|0--34:T>C	chr2R	702878016	SECCE2Rv1G0111710.1	Lectin receptor kinase	0.009524302	0.060999905			OS04G0531400	Salt Intolerance 2	SIT2	Resistance or Tolerance	Salinity tolerance	salinity tolerance	10.1105/tpc.114.125187
HDT	100077389|F|0--66:G>C	chr2R	889120267	SECCE2Rv1G0132320.1	transcription factor-like protein			0.014251923	0.107007604	OS04G0637000	-	ostgap1	Resistance or Tolerance	Other stress resistance	Regulation of production of phytoalexins and allelochemicals.	10.1074/jbc.M109.036871
HDT	100026964|F|0--11:C>A	chr3R	652963398	SECCE3Rv1G0183650.1	Wuschel homeobox protein	0.010741091	0.063374668			OS01G0667400	DWARF TILLER1	DWT1	Morphological	Panicle flower	panicle size, the number of spikelets	10.1371/journal.pgen.1004154
HDT	100045972|F|0--25:C>G	chr4R	27705186	SECCE4Rv1G0219050.1	GAI-like protein 1	0.023717915	0.025047913	0.047609771	0.018914422	OS03G0707600	slender rice1	slr1	Morphological	Dwarf	Cell division and expansion. Gibberellin sensitivity.	10.1105/tpc.13.5.999
HDT	100046645|F|0--52:G>C	chr5R	397306981	SECCE5Rv1G0321090.1	Kinesin-like protein	0.045867577	0.020065346			OS09G0114500	gibberellin-deficient dwarf1	gdd1	Morphological	Dwarf	Dwarfism. Cell elongation. Regulation of gibberellin biosynthesis.	10.1105/tpc.110.081901
HDT	100044467|F|0--5:A>G	chr5R	404309991	SECCE5Rv1G0321480.1	FCA protein	0.030599911	0.054303068			OS09G0123200	-	rFCA	Physiological	Flowering	Flowering time.	10.1007/s10540-007-9047-y
HDT	100073954|F|0--8:G>C	chr5R	802403401	SECCE5Rv1G0364630.1	Chalcone-flavonone isomerase family protein	0.042870347	0.031417721			OS03G0819600	gold hull and internode 1	gh1	Morphological	Culm leaf	Flavonoid content. Seed color. Internode color.	10.1007/s00425-012-1598-x
HDT	100036919|F|0--26:C>G	chr6R	538992555	SECCE6Rv1G0405990.1	Phosphoribulokinase	0.026549456	0.061445274			OS02G0698000	sedoheptulose-1,7-bisphosphatase	SBPase	Resistance or Tolerance	Other stress resistance	Photosynthetic ability under high tenperature condition.	10.1007/s00299-006-0299-y
HDT	5138299|F|0--41:G>C	chr7R	59660582	SECCE7Rv1G0464230.1	Jasmonate ZIM domain protein			0.049920727	0.107839717	OS03G0180800	-	OsTIFY11a	Resistance or Tolerance	Drought tolerance	Drought and salinity tolerance.	10.1007/s11103-009-9524-8
HDT	100076250|F|0--64:C>G	chr7R	59876218	SECCE7Rv1G0464290.1	3-ketoacyl-CoA synthase			0.049920727	0.032861322	OS03G0181500	onion 1	oni1	Morphological	Shoot seedling	Shoot organization.	10.1111/j.1365-313X.2011.04530.x
HDT	100034351|F|0--34:A>G	chrUn	166552903	SECCEUnv1G0547050.1	Sucrose transporter protein	0.016439226	0.063076065			OS12G0641400	sucrose transporter 2	ossut2	Physiological	Source activity	Sugar export. Growth retardation.	10.1104/pp.111.176982

## Sheet: suppltable5 GPC
Trait	DArTseqTM SNP ID	Lo7 pseudomolecule	Position (bp)	Lo7 cds	description	Padj 2011	R2 2011	Padj 2012	R2 2012	Rice locus ID	Rice gene	gene symbol	Trait function	Trait	Objective	doi													chromosome	tblQTARO_170210_start	tblQTARO_170210_end	locus_id	alias	Genebank Acc	isolation
GPC	100062573|F|0--28:C>A	chr2R	132751939	SECCE2Rv1G0080750.1	Cellulose synthase-like protein			0.0487869	0.027935374	OS03G0377700	cellulose synthase A5	CESA5	Morphological	Dwarf	O.glaberrima Dwarfism to Rice tungro sperical virus (RTVS) infection	10.3389/fmicb.2014.00026
GPC	5037449|F|0--63:C>A	chr2R	132752293	SECCE2Rv1G0080750.1	Cellulose synthase-like protein			0.038684019	0.101737832	OS03G0377700	cellulose synthase A5	CESA5	Morphological	Dwarf	O.glaberrima Dwarfism to Rice tungro sperical virus (RTVS) infection	10.3389/fmicb.2014.00026
GPC	5205924|F|0--12:A>G	chr2R	702877578	SECCE2Rv1G0111710.1	Lectin receptor kinase			0.047759299	0.131316662	OS04G0531400	Salt Intolerance 2	SIT2	Resistance or Tolerance	Salinity tolerance	salinity tolerance	10.1105/tpc.114.125187
GPC	100023588|F|0--34:T>C	chr2R	702878016	SECCE2Rv1G0111710.1	Lectin receptor kinase	0.04912107	0.024705857			OS04G0531400	Salt Intolerance 2	SIT2	Resistance or Tolerance	Salinity tolerance	salinity tolerance	10.1105/tpc.114.125187
GPC	100082729|F|0--52:C>G	chr2R	766439976	SECCE2Rv1G0116650.1	Glycosyltransferase	0.044137051	0.030623778			OS04G0556500	cZ-O-glucosyltransferase 1	cZOGT1	Morphological	Dwarf	Dwarfism. Leaf senescence. Crown root.	10.1104/pp.112.196733
GPC	3742587|F|0--52:G>C	chr2R	766439976	SECCE2Rv1G0116650.1	Glycosyltransferase			0.049152995	0.092990229	OS04G0556500	cZ-O-glucosyltransferase 1	cZOGT1	Morphological	Dwarf	Dwarfism. Leaf senescence. Crown root.	10.1104/pp.112.196733
GPC	100026964|F|0--11:C>A	chr3R	652963398	SECCE3Rv1G0183650.1	Wuschel homeobox protein	0.026767108	0.046227271			OS01G0667400	DWARF TILLER1	DWT1	Morphological	Culm leaf	internode elongation, cell division and elongation, tiller growth	10.1371/journal.pgen.1004154
GPC	100045972|F|0--25:C>G	chr4R	27705186	SECCE4Rv1G0219050.1	GAI-like protein 1	0.03468838	0.020816049			OS03G0707600	slender rice1	slr1	Morphological	Dwarf	Cell division and expansion. Gibberellin sensitivity.	10.1105/tpc.13.5.999
GPC	100071002|F|0--48:C>G	chr4R	47521350	SECCE4Rv1G0221290.1	Growth-regulating factor	0.013490605	0.071986094			OS03G0729500	Growth regulating factor	OsGRF6	Morphological	Panicle flower	open husk, long sterile lemma	10.1104/pp.114.235564
GPC	100108754|F|0--44:T>C	chr4R	47521350	SECCE4Rv1G0221290.1	Growth-regulating factor			0.048215149	0.062067367	OS03G0729500	Growth regulating factor	OsGRF6	Morphological	Panicle flower	open husk, long sterile lemma	10.1104/pp.114.235564
GPC	3344181|F|0--28:T>C	chr5R	873940820	SECCE5Rv1G0376800.1	Chaperone DnaK			0.047554446	0.048501812	OS02G0774300	mitochondrial heat shock protein 70	mtHsp70	Resistance or Tolerance	Other stress resistance	Heat and redox induced programmed cell death in protoplast.	10.1016/j.febslet.2010.11.051
GPC	100076250|F|0--64:C>G	chr7R	59876218	SECCE7Rv1G0464290.1	3-ketoacyl-CoA synthase			0.049549592	0.036701137	OS03G0181500	onion 1	oni1	Morphological	Shoot seedling	Shoot organization.	10.1111/j.1365-313X.2011.04530.x
GPC	100017520|F|0--32:C>G	chr7R	85750001	SECCE7Rv1G0467250.1	Sucrose transporter			0.041062212	0.211014225	OS03G0170900	Sucrose transporter 1	OsSUT1	Morphological	Dwarf	Dwarfism. Flowering time.	10.1093/pcp/pce148
GPC	100056355|F|0--9:A>G	chr7R	259418004	SECCE7Rv1G0479810.1	Ethylene-overproduction protein 1	0.018787786	0.030682098	0.041062212	0.035078934	OS03G0294700	ETHYLENE OVERPRODUCER 1-like	OsETOL1	Resistance or Tolerance	Drought tolerance	negative role in drought tolerance at the reproductive stage	10.1111/tpj.12508
	100075107|F|0--43:A>C			SECCE1Rv1G0063650.1	UDP-glucose-4-epimerase	0.043812837	0.036504518			OS05G0595100	rice Uridine 5`-diphospho-glucose 4-epimerase1	OsUGE1	Physiological trait	Culm leaf	cell wall polysaccharide biosynthesis under N-limiting condition	10.1371/journal.pone.0096158
	100075107|F|0--43:A>C			SECCE1Rv1G0063650.1	UDP-glucose-4-epimerase	0.043812837	0.036504518			OS05G0595100	rice Uridine 5`-diphospho-glucose 4-epimerase1	OsUGE1	Physiological trait	Source activity	sucrose biosynthesis during growth under N-limitation conditions (higher sucrose, lower glucose contents)	10.1371/journal.pone.0096158
	100171165|F|0--13:A>G			SECCE7Rv1G0522470.1	Cytochrome P450 family protein			0.043226746	0.139066563	OS04G0101400	cytochrome P450 93G1	CYP93G1	Physiological trait	Others	biosynthesis of different tricin O-conjugated derivatives	10.1104/pp.114.239723

## Sheet: suppltable5 STC
Trait	DArTseqTM SNP ID	Lo7 pseudomolecule	Position (bp)	Lo7 cds	description	Padj 2011	R2 2011	Padj 2012	R2 2012	Rice locus ID	Rice gene	gene symbol	Trait function	Trait	Objective	doi													chromosome	tblQTARO_170210_start	tblQTARO_170210_end	locus_id	alias	Genebank Acc	isolation
STC	100074710|F|0--67:C>A	chr1R	553133389	SECCE1Rv1G0039790.1	DNA glycosylase			0.0479193	0.0143719	OS05G0446000	DNA glycosylase/lyase DNG701	DNG701	Others	Others	Transposition of transposons.	10.1073/pnas.1112704108
STC	100062573|F|0--28:C>A	chr2R	132751939	SECCE2Rv1G0080750.1	Cellulose synthase-like protein			0.0345731	0.0434147	OS03G0377700	cellulose synthase A5	CESA5	Morphological trait	Dwarf	O.glaberrima Dwarfism to Rice tungro sperical virus (RTVS) infection	10.3389/fmicb.2014.00026
STC	100082729|F|0--52:C>G	chr2R	766439976	SECCE2Rv1G0116650.1	Glycosyltransferase	0.009123221	0.075120554			OS04G0556500	cZ-O-glucosyltransferase 1	cZOGT1	Morphological trait	Root	Dwarfism. Leaf senescence. Crown root.	10.1104/pp.112.196733
STC	100077092|F|0--38:A>G	chr3R	28991994	SECCE3Rv1G0149820.1	Zinc finger family protein	0.03620025	0.019446393			OS01G0129200	JAGGED	Osjag	Morphological trait	Panicle flower	Floral organ development.	10.1007/s11103-010-9703-7
STC	100081940|F|0--8:C>T	chr3R	652963398	SECCE3Rv1G0183650.1	Wuschel homeobox protein			0.0436867	0.0917922	OS01G0667400	DWARF TILLER1	DWT1	Morphological trait	Culm leaf	internode elongation, cell division and elongation, tiller growth	10.1371/journal.pgen.1004154
STC	100045972|F|0--25:C>G	chr4R	27705186	SECCE4Rv1G0219050.1	GAI-like protein 1	0.047335776	0.015578021			OS03G0707600	slender rice1	slr1	Morphological trait	Dwarf	Cell division and expansion. Gibberellin sensitivity.	10.1105/tpc.13.5.999
STC	100071002|F|0--48:C>G	chr4R	47521350	SECCE4Rv1G0221290.1	Growth-regulating factor	0.023418149	0.054892167			OS03G0729500	Growth regulating factor	OsGRF6	Morphological trait	Panicle flower	open husk, long sterile lemma	10.1104/pp.114.235564
STC	100099145|F|0--58:C>G	chr4R	584350427	SECCE4Rv1G0249530.1	Ribonucleoside-diphosphate reductase small chain	0.020397584	0.064738585			OS06G0257450	Stripe1	st1	Physiological trait	Source activity	Chloroplast development during seedling stage.	10.1104/pp.109.136648
STC	100148934|F|0--18:G>C	chr5R	491838375	SECCE5Rv1G0327400.1	Guanine nucleotide-binding protein subunit gamma 3			0.0363372	0.10557	OS09G0441900	DENSE AND ERECT PANICLES 1	DEP1	Physiological trait	Panicle flower	grain yield	10.1038/ng.2958
STC	100080151|F|0--58:C>G	chr6R	696431303	SECCE6Rv1G0423520.1	LOB domain protein-like			0.0422098	0.0626128	OS02G0820500	degenerated hull 1	dh1	Morphological trait	Panicle flower	Glume formation.	10.1007/s11103-007-9283-3
STC	100037407|F|0--10:G>C	chr7R	45292948	SECCE7Rv1G0462370.1	Phosphate transporter protein			0.0306544	0.0426081	OS10G0444700	phosphate transporter8	OsPT8	Resistance or Tolerance	Other soil stress tolerance	Phosphate uptake.	10.1104/pp.111.175240
STC	3586640|F|0--7:C>G	chr7R	90886025	SECCE7Rv1G0467760.1	Fatty acyl-CoA reductase			0.0366349	0.0922801	OS03G0167600	defective pollen wall	dpw	Physiological trait	Sterility	Pollen wall development.	10.1105/tpc.111.087528
STC	100056355|F|0--9:A>G	chr7R	259418004	SECCE7Rv1G0479810.1	Ethylene-overproduction protein 1	0.018283601	0.029777374	0.016806	0.0636338	OS03G0294700	ETHYLENE OVERPRODUCER 1-like	OsETOL1	Resistance or Tolerance	Drought tolerance	negative role in drought tolerance at the reproductive stage	10.1111/tpj.12508
STC	4486186|F|0--13:A>G	chr7R	877656805	SECCE7Rv1G0522470.1	Cytochrome P450 family protein			0.0251719	0.155673	OS04G0101400	cytochrome P450 93G1	CYP93G1	Physiological trait	Others	biosynthesis of different tricin O-conjugated derivatives	10.1104/pp.114.239723
	100171165|F|0--13:A>G			SECCE7Rv1G0522470.1	Cytochrome P450 family protein			0.0386239	0.170159	OS04G0101400	cytochrome P450 93G1	CYP93G1	Physiological trait	Others	biosynthesis of different tricin O-conjugated derivatives	10.1104/pp.114.239723
	3891648|F|0--41:G>C			SECCE2Rv1G0131590.1	Transcription factor protein			0.0425469	0.0733965	OS04G0641700	increased leaf inclination1	ili1	Morphological trait	Dwarf	Leaf angle. Cell length. Brassinosteroid sensitivity.	10.1105/tpc.109.070441
	5042828|F|0--14:T>C			SECCE5Rv1G0327400.1	Guanine nucleotide-binding protein subunit gamma 3			0.045145	0.0907134	OS09G0441900	DENSE AND ERECT PANICLES 1	DEP1	Morphological trait	Dwarf	nitrogen-insensitive plant growth coupled with increased nitrogen uptake and assimilation, internodes length,	10.1038/ng.2958
	5042828|F|0--14:T>C			SECCE5Rv1G0327400.1	Guanine nucleotide-binding protein subunit gamma 3			0.045145	0.0907134	OS09G0441900	DENSE AND ERECT PANICLES 1	DEP1	Morphological trait	Culm leaf	wider, shorter leaves, tiller number,	10.1038/ng.2958
	5042828|F|0--14:T>C			SECCE5Rv1G0327400.1	Guanine nucleotide-binding protein subunit gamma 3			0.045145	0.0907134	OS09G0441900	dense and erect panicle 1	DEP1	Morphological trait	Panicle flower	Dense and erect panicle.	10.1038/ng.352
	5042828|F|0--14:T>C			SECCE5Rv1G0327400.1	Guanine nucleotide-binding protein subunit gamma 3			0.045145	0.0907134	OS09G0441900	DENSE AND ERECT PANICLES 1	DEP1	Physiological trait	Panicle flower	grain yield	10.1038/ng.2958
	5042828|F|0--14:T>C			SECCE5Rv1G0327400.1	Guanine nucleotide-binding protein subunit gamma 3			0.045145	0.0907134	OS09G0441900	DENSE AND ERECT PANICLES 1	DEP1	Morphological trait	Dwarf	nitrogen-insensitive plant growth coupled with increased nitrogen uptake and assimilation, internodes length,	10.1038/ng.2958
	5042828|F|0--14:T>C			SECCE5Rv1G0327400.1	Guanine nucleotide-binding protein subunit gamma 3			0.045145	0.0907134	OS09G0441900	DENSE AND ERECT PANICLES 1	DEP1	Morphological trait	Culm leaf	wider, shorter leaves, tiller number,	10.1038/ng.2958
	5042828|F|0--14:T>C			SECCE5Rv1G0327400.1	Guanine nucleotide-binding protein subunit gamma 3			0.045145	0.0907134	OS09G0441900	dense and erect panicle 1	DEP1	Morphological trait	Panicle flower	Dense and erect panicle.	10.1038/ng.352
	5042828|F|0--14:T>C			SECCE5Rv1G0327400.1	Guanine nucleotide-binding protein subunit gamma 3			0.045145	0.0907134	OS09G0441900	DENSE AND ERECT PANICLES 1	DEP1	Physiological trait	Panicle flower	grain yield	10.1038/ng.2958
	5042828|F|0--14:T>C			SECCE5Rv1G0327400.1	Guanine nucleotide-binding protein subunit gamma 3			0.045145	0.0907134	OS09G0441900	DENSE AND ERECT PANICLES 1	DEP1	Morphological trait	Dwarf	nitrogen-insensitive plant growth coupled with increased nitrogen uptake and assimilation, internodes length,	10.1038/ng.2958
	5042828|F|0--14:T>C			SECCE5Rv1G0327400.1	Guanine nucleotide-binding protein subunit gamma 3			0.045145	0.0907134	OS09G0441900	DENSE AND ERECT PANICLES 1	DEP1	Morphological trait	Culm leaf	wider, shorter leaves, tiller number,	10.1038/ng.2958
	5042828|F|0--14:T>C			SECCE5Rv1G0327400.1	Guanine nucleotide-binding protein subunit gamma 3			0.045145	0.0907134	OS09G0441900	dense and erect panicle 1	DEP1	Morphological trait	Panicle flower	Dense and erect panicle.	10.1038/ng.352
	5042828|F|0--14:T>C			SECCE5Rv1G0327400.1	Guanine nucleotide-binding protein subunit gamma 3			0.045145	0.0907134	OS09G0441900	DENSE AND ERECT PANICLES 1	DEP1	Physiological trait	Panicle flower	grain yield	10.1038/ng.2958

## Sheet: suppltable5 TAX
Trait	DArTseqTM SNP ID	Lo7 pseudomolecule	Position (bp)	Lo7 cds	description	Padj 2011	R2 2011	Padj 2012	R2 2012	Rice locus ID	Rice gene	gene symbol	Trait function	Trait	Objective	doi													chromosome	tblQTARO_170210_start	tblQTARO_170210_end	locus_id	alias	Genebank Acc	isolation
TAX	100004850|F|0--10:G>T	chr1R	43827422	SECCE1Rv1G0008040.1	Protein aluminum sensitive 3	0.041877193	0.01607123			OS05G0119000	sensitive to Al rhizotoxicity2	STAR2	Resistance or Tolerance	Other soil stress tolerance	Aluminium tolerance.	10.1105/tpc.108.064543
TAX	100057885|F|0--13:T>C	chr2R	624485190	SECCE2Rv1G0105720.1	ABC transporter ATP-binding protein	0.033582578	0.043251659			OS04G0459000	ATP Binding cassette B subgroup member 14	OsABCB14	Physiological trait	Culm leaf	auxin influx transporter involved in Fe homeostasis,	10.1111/tpj.12544
TAX	100082729|F|0--52:C>G	chr2R	766439976	SECCE2Rv1G0116650.1	Glycosyltransferase	0.038106997	0.030458526			OS04G0556500	cZ-O-glucosyltransferase 1	cZOGT1	Morphological trait	Dwarf	Dwarfism. Leaf senescence. Crown root.	10.1104/pp.112.196733
TAX	100077092|F|0--38:A>G	chr3R	28991994	SECCE3Rv1G0149820.1	Zinc finger family protein			0.028167587	0.105796858	OS01G0129200	open beak	opb	Morphological trait	Culm leaf	Leaf morphogenesis. Panicle architecture. Floral organ identity. Cell proliferation.	10.1111/j.1365-313X.2009.03823.x
TAX	100053527|F|0--46:T>C	chr3R	777544972	SECCE3Rv1G0194160.1	Cyclin			0.044871015	0.042658502	OS01G0805600	Cyclin B1;1	Orysa;CycB1;1	Morphological trait	Seed	Endosperm formation. Embryo size.	10.1007/s00425-009-1051-y
TAX	100137734|F|0--28:C>T	chr3R	858457177	SECCE3Rv1G0200890.1	Ammonium transporter			0.035909671	0.111532599	OS01G0870300	ammonium transporter 3;1	OsAMT3;1	Physiological trait	Root	involvement in mycorrhizal N uptake pathway	10.1016/j.plaphy.2013.11.029.
TAX	100080151|F|0--58:C>G	chr6R	696431303	SECCE6Rv1G0423520.1	LOB domain protein-like			0.035005755	0.098257722	OS02G0820500	degenerated hull 1	dh1	Morphological trait	Panicle flower	Glume formation.	10.1007/s11103-007-9283-3
TAX	100037407|F|0--10:G>C	chr7R	45292948	SECCE7Rv1G0462370.1	Phosphate transporter protein			0.029384848	0.032933586	OS10G0444700	phosphate transporter8	OsPT8	Resistance or Tolerance	Other soil stress tolerance	Phosphate uptake.	10.1104/pp.111.175240
TAX	3586640|F|0--7:C>G	chr7R	90886025	SECCE7Rv1G0467760.1	Fatty acyl-CoA reductase			0.048001319	0.068944862	OS03G0167600	defective pollen wall	dpw	Physiological trait	Sterility	Pollen wall development.	10.1105/tpc.111.087528
TAX	3585435|F|0--47:T>A	chr7R	698909606	SECCE7Rv1G0502620.1	GRAS transcription factor			0.044755622	0.054250494	OS06G0610350	monoculm 1	moc1	Morphological trait	Culm leaf	Axillary meristemo formation. Tillering.	10.1038/nature01518
TAX	100025616|F|0--20:C>T	chrUn	16468347	SECCEUnv1G0531210.1	Phototropic-responsive NPH3 family protein	0.039916194	0.026572389	0.043567434	0.079348307	OS02G0568200	Coleoptile phototropism 1	cpt1	Morphological trait	Shoot seedling	Root and seedling phototropism. Auxin translocation.	10.1105/tpc.104.028357
	5046851|F|0--40:G>T			SECCE6Rv1G0386560.1	4-coumarate CoA ligase			0.028696817	0.1416654	OS02G0177600	4-Coumarate:coenzyme A ligase	Os4CL3	Physiological trait	Sterility	Lignin content. Dwarfism. Culm length. Anther development.	10.1104/pp.111.178301
	5046851|F|0--40:G>T			SECCE6Rv1G0386560.1	4-coumarate CoA ligase			0.028696817	0.1416654	OS02G0177600	4-Coumarate:coenzyme A ligase	Os4CL3	Resistance or Tolerance	Lodging resistance	Lignin content. Dwarfism. Culm length. Anther development.	10.1104/pp.111.178301
	5046851|F|0--40:G>T			SECCE6Rv1G0386560.1	4-coumarate CoA ligase			0.028696817	0.1416654	OS02G0177600	4-Coumarate:coenzyme A ligase	Os4CL3	Morphological trait	Dwarf	Lignin content. Dwarfism. Culm length. Anther development.	10.1104/pp.111.178301

## Sheet: suppltable5 WAX
Trait	DArTseqTM SNP ID	Lo7 pseudomolecule	Position (bp)	Lo7 cds	description	Padj 2011	R2 2011	Padj 2012	R2 2012	Rice locus ID	Rice gene	gene symbol	Trait function	Trait	Objective	doi													chromosome	tblQTARO_170210_start	tblQTARO_170210_end	locus_id	alias	Genebank Acc	isolation
WAX	100057885|F|0--13:T>C	chr2R	624485190	SECCE2Rv1G0105720.1	ABC transporter ATP-binding protein	0.015361224	0.073970162			OS04G0459000	ATP Binding cassette B subgroup member 14	OsABCB14	Physiological trait	Culm leaf	auxin influx transporter involved in Fe homeostasis,	10.1111/tpj.12544
WAX	100023588|F|0--34:T>C	chr2R	702878016	SECCE2Rv1G0111710.1	Lectin receptor kinase	0.020208911	0.050766817			OS04G0531400	Salt Intolerance 2	SIT2	Resistance or Tolerance	Salinity tolerance	salinity tolerance	10.1105/tpc.114.125187
WAX	100026964|F|0--11:C>A	chr3R	652963398	SECCE3Rv1G0183650.1	Wuschel homeobox protein	0.048349711	0.034123343			OS01G0667400	DWARF TILLER1	DWT1	Morphological trait	Culm leaf	internode elongation, cell division and elongation, tiller growth	10.1371/journal.pgen.1004154
WAX	100053527|F|0--46:T>C	chr3R	777544972	SECCE3Rv1G0194160.1	Cyclin			0.04802663	0.038968346	OS01G0805600	Cyclin B1;1	Orysa;CycB1;1	Morphological trait	Seed	Endosperm formation. Embryo size.	10.1007/s00425-009-1051-y
WAX	100050015|F|0--10:T>C	chr5R	528874663	SECCE5Rv1G0330420.1	PHD finger protein	0.040616652	0.026883145			OS09G0449000	thermo-sensitive genic male sterility 9-1	TMS 9-1(OsMS1)	Physiological trait	Sterility	pollen fertility	10.1007/s00122-014-2289-8
WAX	100073954|F|0--8:G>C	chr5R	802403401	SECCE5Rv1G0364630.1	Chalcone-flavonone isomerase family protein	0.027929677	0.045634324			OS03G0819600	gold hull and internode 1	gh1	Morphological trait	Culm leaf	Flavonoid content. Seed color. Internode color.	10.1007/s00425-012-1598-x
WAX	100056355|F|0--9:A>G	chr7R	259418004	SECCE7Rv1G0479810.1	Ethylene-overproduction protein 1	0.045838744	0.015126742			OS03G0294700	ETHYLENE OVERPRODUCER 1-like	OsETOL1	Resistance or Tolerance	Drought tolerance	negative role in drought tolerance at the reproductive stage	10.1111/tpj.12508
WAX	100067563|F|0--55:A>G	chr7R	877656592	SECCE7Rv1G0522470.1	Cytochrome P450 family protein			0.041679152	0.041489686	OS04G0101400	cytochrome P450 93G1	CYP93G1	Physiological trait	Others	biosynthesis of different tricin O-conjugated derivatives	10.1104/pp.114.239723
WAX	100025616|F|0--20:C>T	chrUn	16468347	SECCEUnv1G0531210.1	Phototropic-responsive NPH3 family protein			0.047534083	0.084207879	OS02G0568200	Coleoptile phototropism 1	cpt1	Morphological trait	Shoot seedling	Root and seedling phototropism. Auxin translocation.	10.1105/tpc.104.028357
32545	100075107|F|0--43:A>C			SECCE1Rv1G0063650.1	UDP-glucose-4-epimerase			0.048841127	0.078698144	OS05G0595100	rice Uridine 5`-diphospho-glucose 4-epimerase1	OsUGE1	Physiological trait	Culm leaf	cell wall polysaccharide biosynthesis under N-limiting condition	10.1371/journal.pone.0096158
32545	100075107|F|0--43:A>C			SECCE1Rv1G0063650.1	UDP-glucose-4-epimerase			0.048841127	0.078698144	OS05G0595100	rice Uridine 5`-diphospho-glucose 4-epimerase1	OsUGE1	Physiological trait	Source activity	sucrose biosynthesis during growth under N-limitation conditions (higher sucrose, lower glucose contents)	10.1371/journal.pone.0096158
43790	5203692|F|0--14:T>G			SECCE2Rv1G0132320.1	transcription factor-like protein			0.047534083	0.088005688	OS04G0637000	-	ostgap1	Resistance or Tolerance	Other stress resistance	Regulation of production of phytoalexins and allelochemicals.	10.1074/jbc.M109.036871
43790	5203692|F|0--14:T>G			SECCE2Rv1G0132320.1	transcription factor-like protein			0.047534083	0.088005688	OS04G0637000	-	ostgap1	Resistance or Tolerance	Other stress resistance	Regulation of production of phytoalexins and allelochemicals.	10.1074/jbc.M109.036871
