# Supplementary material for: A Genome-Wide Association Study Pinpoints Quantitative Trait Genes for Plant Height, Heading Date, Grain Quality, and Yield in Rye (Secale cereale L.)
Source: Front Plant Sci. 2021 Oct 29;12:718081. doi: 10.3389/fpls.2021.718081 (PMC8586073; doi:10.3389/fpls.2021.718081)
Supplement: Supplementary file 6 [file Table_6.XLSX]

## Sheet: suppltable6
			Trait	PHT	PHT	PHT	PHT	GYD	GYD	GYD	GYD	TIN	TIN	TIN	TIN	TGW	TGW	TGW	TGW	HDT	HDT	HDT	HDT	GPC	GPC	GPC	GPC	STC	STC	STC	STC	TAX	TAX	TAX	TAX	WAX	WAX	WAX	WAX
DArTseqTM SNP ID	Lo7 pseudomolecule	Position (bp)	Lo7 cds	Padj 2011	R2 2011	Padj 2012	R2 2012	Padj 2011	R2 2011	Padj 2012	R2 2012	Padj 2011	R2 2011	Padj 2012	R2 2012	Padj 2011	R2 2011	Padj 2012	R2 2012	Padj 2011	R2 2011	Padj 2012	R2 2012	Padj 2011	R2 2011	Padj 2012	R2 2012	Padj 2011	R2 2011	Padj 2012	R2 2012	Padj 2011	R2 2011	Padj 2012	R2 2012	Padj 2011	R2 2011	Padj 2012	R2 2012	description
100068611|F|0--6:G>T	chr1R	92755496	SECCE1Rv1G0012470.1	0.020738577	0.031550591	0.027585383	0.093885529									0.019073579	0.034865639	0.038918822	0.055666151	0.007400035	0.046045507											0.033327915	0.025015629			0.008589575	0.045181753			DNA binding protein, putative
100007384|F|0--10:C>G	chr1R	543267156	SECCE1Rv1G0038830.1													0.035989094	0.025737796	0.030151479	0.047297321	0.049708077	0.017061825	0.001093787	0.144382232																	Protein NRT1/ PTR FAMILY 5.5
100055917|F|0--23:C>G	chr1R	660237669	SECCE1Rv1G0052260.1																	0.024335349	0.050918345	0.021560929	0.069350427					0.028833884	0.044378695			0.015958619	0.072377909	0.02348101	0.054007016	0.024216068	0.070713441			Protein kinase-like
100066352|F|0--58:T>C	chr1R	664854563	SECCE1Rv1G0052830.1			0.032741705	0.038978548							0.049538155	0.035740725	0.040255642	0.034749961	0.030142403	0.027805264					0.048226491	0.02955619	0.047554446	0.023424257	0.007977941	0.069089959	0.0461431	0.0212188	0.03984139	0.035682454							Methyltransferase
100015969|F|0--65:G>C	chr2R	63905050	SECCE2Rv1G0073100.1															0.044754613	0.017327155													0.018648807	0.030698401	0.046495417	0.015869202	0.027926141	0.024823919	0.025146778	0.039063482	F-box protein family
100064867|F|0--61:C>G	chr2R	90751897	SECCE2Rv1G0076390.1	0.020232273	0.026887878															0.019719107	0.025641889	0.047080174	0.034290118	0.039934327	0.017281364	0.038684019	0.118801997													ABC transporter, putative
100007751|F|0--21:T>C	chr2R	746945678	SECCE2Rv1G0115170.1					0.049577	0.0178387	0.038879974	0.084109631													0.003311429	0.066162752			0.000699438	0.094511027	0.0456537	0.0582068									CsAtPR5
100021455|F|0--8:A>G	chr3R	20891198	SECCE3Rv1G0148890.1															0.031297841	0.055840563			0.010961214	0.106574519	0.039826332	0.016554862	0.045524676	0.06058468	0.03635634	0.017915602	0.0436867	0.0475203									Core-2/I-branching beta-1,6-N-acetylglucosaminyltransferase family protein, putative
100067220|F|0--43:C>G	chr3R	690064072	SECCE3Rv1G0186750.1																									0.049799798	0.036400672	0.0282656	0.0417658	0.037702791	0.04579309	0.029536775	0.035816551			0.025146778	0.052746948	TSA: Wollemia nobilis Ref_Wollemi_Transcript_14910_3291 transcribed RNA sequence
100026113|F|0--22:C>T	chr3R	690253079	SECCE3Rv1G0186770.1																									0.049799798	0.036400672	0.0283099	0.0411782	0.037702791	0.04579309	0.017870653	0.048103093			0.018774	0.065246339	Transmembrane protein, putative
100069092|F|0--55:A>G	chr3R	744224289	SECCE3Rv1G0190890.1															0.014994622	0.110782266													0.006158444	0.047151034	0.010394262	0.16905304	0.041022308	0.017749055	0.02049136	0.180617228	Serpin family protein
100068832|F|0--44:C>T	chr4R	17376573	SECCE4Rv1G0217580.1													0.037457914	0.018993272	0.036862363	0.023048899											0.0465311	0.0191729			0.018199069	0.044767098	0.046635016	0.015196777	0.025782413	0.039163562	Protein kinase superfamily protein
100039923|F|0--5:G>A	chr4R	503501841	SECCE4Rv1G0243530.1	0.029507391	0.035692045	0.049571521	0.015632016													0.038019832	0.031019895			0.01867121	0.054215686	0.038684019	0.031864397	0.010270416	0.063497557							0.016247558	0.061570228			Chorismate mutase
100072719|F|0--15:T>A	chr4R	749626202	SECCE4Rv1G0269590.1	0.004070134	0.07562246	0.010050879	0.072712174									0.010447719	0.052784113	0.034243294	0.024080118													0.038106997	0.022417311							F-box family protein
100065434|F|0--18:T>G	chr5R	665715898	SECCE5Rv1G0347130.1													0.008369059	0.060988993			0.012705043	0.04003607							0.034638846	0.02428388	0.0449633	0.02056	0.0025038	0.086040934	0.034255571	0.028637089	0.024216068	0.03390739			transmembrane protein, putative (DUF594)
100065434|F|0--61:G>C	chr5R	665715898	SECCE5Rv1G0347130.1																	0.01360291	0.054568797	0.022879327	0.04176198	0.016160333	0.057120649			0.004273571	0.094769436	0.0283296	0.0403607	0.006610739	0.087749553	0.036817502	0.039943568	0.019247329	0.047045752	0.04649243	0.026038781	transmembrane protein, putative (DUF594)
100022302|F|0--62:T>G	chr5R	842350428	SECCE5Rv1G0370510.1					0.0486863	0.0142822	0.044165858	0.060889944					0.031390957	0.023103548	0.028956105	0.059546827							0.048804468	0.051708935			0.0465311	0.0426626									Polyubiquitin
100087508|F|0--30:T>G	chr5R	861901029	SECCE5Rv1G0374090.1	0.011660944	0.039639646	0.02257989	0.091524243					0.047405169	0.018728054					0.025088532	0.068253574					0.042549214	0.018315677	0.047759299	0.056745972	0.024514538	0.026720313											Sphingomyelin phosphodiesterase 4
100061156|F|0--11:G>C	chr5R	865578937	SECCE5Rv1G0374960.1	0.038852355	0.035997334	0.041397392	0.082363915																	0.020201118	0.054543881			0.0031	0.090912407			0.018648807	0.057958478	0.029695731	0.126899563					O-methyltransferase
100065769|F|0--13:C>T	chr6R	614054845	SECCE6Rv1G0412350.1					0.012453	0.0517316	0.021697858	0.031570427					0.032475031	0.020754812	0.00073287	0.085680144					0.02894685	0.021286926											0.009919065	0.039717824			Flavonol synthase
100058625|F|0--45:G>A	chr7R	141972010	SECCE7Rv1G0472410.1	0.013044575	0.037755951	0.013786461	0.155389337					0.046831528	0.02359192	0.049538155	0.207390175			0.003004372	0.209155398					0.013227525	0.03936817			0.006989091	0.048020024											Alpha-glucosidase like protein
100004704|F|0--23:A>G	chr7R	230330132	SECCE7Rv1G0477980.1	0.022960147	0.045030779	0.048919181	0.018336056					0.046831528	0.033928119	0.049538155	0.030566058													0.043193522	0.028990229	0.016806	0.0574597	0.04032007	0.029033453	0.017138232	0.043272407					Cysteine-rich receptor-kinase-like protein
100041186|F|0--43:C>A	chr7R	231824142	SECCE7Rv1G0478170.1	0.029457449	0.03307148							0.046831528	0.026759354	0.049538155	0.026959787															0.016806	0.0615715	0.037532046	0.026513044	0.0074659	0.06150107					ATP synthase subunit b
100056355|F|0--9:A>G	chr7R	259418004	SECCE7Rv1G0479810.1	0.047923933	0.014683586							0.0477819	0.016432505	0.049538155	0.022972179	0.027948109	0.025691032	0.042371908	0.025656829					0.018787786	0.030682098	0.041062212	0.035078934	0.018283601	0.029777374	0.016806	0.0636338					0.045838744	0.015126742			Ethylene-overproduction protein 1
100051514|F|0--61:T>C	chr7R	276890441	SECCE7Rv1G0480940.1	0.012492968	0.078083358											0.04783082	0.037877778	0.004463515	0.090422299					0.031471588	0.052096703			0.030694002	0.05201749	0.0283099	0.0551247	0.039612173	0.040496221							Protein COBRA, putative
100056016|F|0--22:T>G	chr7R	277468929	SECCE7Rv1G0480990.1	0.00862336	0.040344169									0.049538155	0.05498844	0.035989094	0.019167601	0.011831585	0.109316843					0.004867619	0.049579346			0.010270416	0.038788476	0.0432835	0.0498666									Calmodulin-binding protein, putative, expressed
100017681|F|0--29:C>G	chr7R	298657247	SECCE7Rv1G0482040.1	0.016436592	0.034304809											0.04718458	0.01625877	0.039562644	0.066747862			0.040365652	0.04866864	0.001849333	0.078904804			0.000899	0.086605161	0.016806	0.207567	0.034020312	0.02237596							Hexosyltransferase
100005534|F|0--56:G>A	chr7R	338457562	SECCE7Rv1G0484030.1													0.033327592	0.029614921	0.009498261	0.050109111					0.023471266	0.033219459	0.038684019	0.037273016	0.029806321	0.028472646	0.016806	0.0772569					0.02084469	0.036534805			Cytochrome P450 family protein
100073278|F|0--16:A>G	chr7R	581448661	SECCE7Rv1G0494330.1	0.032345596	0.022060372	0.046945243	0.038841326					0.048153586	0.016054787			0.041301882	0.016866728	0.017800722	0.092065848					0.019152262	0.030589875			0.027779421	0.0240799											O-glucosyltransferase rumi
100054093|F|0--38:C>T	chr7R	718944370	SECCE7Rv1G0504050.1	0.012248121	0.040319656									0.049538155	0.054978273	0.029410658	0.024753648	0.049652328	0.04504763					0.028870479	0.023888475			0.04485664	0.017400535	0.04681	0.0428565									MADS-box transcription factor family protein
100066097|F|0--65:G>A	chr7R	728742744	SECCE7Rv1G0504960.1	0.046328279	0.0151063											0.014310698	0.034783054	0.017652395	0.09626078	0.006901067	0.040727698	0.015663798	0.086771996	0.048551231	0.014469556													0.045266909	0.066086546	C2 calcium/lipid-binding and GRAM domain protein
100040175|F|0--68:T>C	chr7R	873136407	SECCE7Rv1G0521190.1									0.046514081	0.045948784			0.037401633	0.033421224	0.035727504	0.022102657	0.021284846	0.039344315	0.025283655	0.035023052													0.023009608	0.040419457	0.045609012	0.019678258	Chitinase
100067566|F|0--67:C>G	chrUn	10254839	SECCEUnv1G0530000.1	0.038852355	0.018673735			0.0355033	0.0227057	0.047637889	0.021503887	0.046831528	0.020886973	0.049538155	0.020965541			0.018162345	0.034119027	0.028758947	0.023315													0.032653499	0.030795606	0.044435247	0.016307398	0.043530849	0.025050938	Receptor protein kinase, putative
100036676|F|0--67:G>A	chrUn	32890642	SECCEUnv1G0533780.1	0.047923933	0.022318748									0.049538155	0.098297898									0.020549427	0.046181051	0.043609107	0.111914632					0.02325053	0.040681475	0.029768427	0.124676523	0.022547751	0.044189006			ABC transporter ATP-binding protein
